# Supplementary material for: Implementing N-terminomics and machine learning to probe in vivo Nt-arginylation
Source: Research Square preprint supplement (doi:10.21203/rs.3.rs-6500900/v1), 2025-05-12
Supplement: Supplementary file 2 [file 7b1509e45b8a24613070d3ee.xlsx]

## Sheet: PSMs from decoy database
Confidence	Sequence	ActivationÂ Type	XCorr	Percolator q-Value	Percolator PEP	percolator_score	Score	Rank	Search Engine	Charge	PrecursorÂ m/zÂ [Da]	error [ppm]	RT	scan_num	Last Scan	Protein Accessions	nmod	strip_seq	seq_len	charge	rt	index	nAA	nestedcol	Modifications	mods	mod_sites	nce	instrument	rt_norm	strip_seq_dbmatch	PCC	COS	SA	SPC	bion_count	bion_pcc	yion_pcc	tp_avg	p2p1	true_set	enzyme	FN	TP	FP	spec_FDR	spec_FPR
Low	[R].qkAHEEANAAR.[K]	HCD	1.85	0.68	1	-0.923	0.25	1	Sequest HT (2)	3	490.925	-5.39	39.373	7255	7255	O43395	ArgAcetylD3	RQKAHEEANAAR	12	3	39.373	1	12		N-Term(ArgAcetylD3);K2(Acetyl:2H(3))	Acetyl:2H(3)@Any N-term;Acetyl:2H(3)@K	0;3	27	QE	-0.0784273	QKAHEEANAAR	0.448623	0.52985	0.355503	-0.176744	2	-0.0777925	0.659077	1	KR	TRUE	trypsin	1	6	14	0.7	0.142857
High	[R].eEARNPkR.[K]	HCD	1.77	0.0017	0.018	0.233	0.27	1	Sequest HT (2)	3	415.902	-0.71	39.5747	7331	7331	P51532	ArgAcetylD3	REEARNPKR	9	3	39.575	2	9		N-Term(ArgAcetylD3);K7(Acetyl:2H(3))	Acetyl:2H(3)@Any N-term;Acetyl:2H(3)@K	0;8	27	QE	-0.0765909	EEARNPKR	0.867215	0.899506	0.712147	0.621334	5	0.887884	0.856337	1	RR	TRUE	trypsin	0	11	4	0.266667	0
High	[R].tGAPAQADSR.[G]	HCD	2.34	0.00015	0.00064	0.68	0.44	1	Sequest HT (2)	2	587.804	0.46	40.4631	7648	7648	P20290	ArgAcetylD3	RTGAPAQADSR	11	2	40.463	3	11		N-Term(ArgAcetylD3)	Acetyl:2H(3)@Any N-term	0	27	QE	-0.0685182	TGAPAQADSR	0.991238	0.991754	0.918188	0.688837	5	0.976894	0.995236	1	RR	TRUE	trypsin	1	9	2	0.181818	0.1
High	[R].sREQkAkQER.[E]	HCD	4.38	5.8e-05	0.00015	0.955	0.52	1	Sequest HT (2)	3	517.628	-0.25	41.1512	7895	7895	Q9NX55	ArgAcetylD3	RSREQKAKQER	11	3	41.151	4	11		N-Term(ArgAcetylD3);K5(Acetyl:2H(3));K7(Acetyl:2H(3))	Acetyl:2H(3)@Any N-term;Acetyl:2H(3)@K;Acetyl:2H(3)@K	0;6;8	27	QE	-0.0622636	SREQKAKQER	0.607216	0.6897	0.484515	0.236867	9	0.411797	0.770384	1	RR	TRUE	trypsin	5	10	3	0.230769	0.333333
High	[R].sAPSQTTkR.[S]	HCD	2.03	0.002	0.022	0.21	0.37	1	Sequest HT (2)	2	611.345	0.37	41.8428	8148	8148	Q8NG27	ArgAcetylD3	RSAPSQTTKR	10	2	41.843	5	10		N-Term(ArgAcetylD3);K8(Acetyl:2H(3))	Acetyl:2H(3)@Any N-term;Acetyl:2H(3)@K	0;9	27	QE	-0.0559727	SAPSQTTKR	0.686051	0.719119	0.510909	-0.39897	3	-0.00207181	0.748578	0	HR	TRUE	trypsin	5	2	6	0.75	0.714286
Medium	[R].eVEkAkR.[A]	HCD	0.97	0.023	0.34	-0.109	0.29	1	Sequest HT (2)	2	575.848	0.01	42.185	8281	8281	P11021	ArgAcetylD3	REVEKAKR	8	2	42.185	6	8		N-Term(ArgAcetylD3);K4(Acetyl:2H(3));K6(Acetyl:2H(3))	Acetyl:2H(3)@Any N-term;Acetyl:2H(3)@K;Acetyl:2H(3)@K	0;5;7	27	QE	-0.0528636	EVEKAKR	0.900138	0.905342	0.720771	0.348933	1	0.360098	0.932397	1	RR	TRUE	trypsin	0	6	6	0.5	0
High	[R].gSQGDSkQQNGPPR.[K]	HCD	2.45	5.8e-05	0.00016	0.947	0.77	1	Sequest HT (2)	2	851.431	0.26	44.0073	8987	8987	Q96HC4	ArgAcetylD3	RGSQGDSKQQNGPPR	15	2	44.007	7	15		N-Term(ArgAcetylD3);K7(Acetyl:2H(3))	Acetyl:2H(3)@Any N-term;Acetyl:2H(3)@K	0;8	27	QE	-0.0363	GSQGDSKQQNGPPR	0.979557	0.980498	0.874066	0.749214	2	0.973962	0.989279	1	RR	TRUE	trypsin	0	6	3	0.333333	0
High	[R].gSQGDSkQQNGPPR.[K]	HCD	4.18	0.00011	0.00039	0.774	0.6	1	Sequest HT (2)	3	567.956	0.01	44.0572	9008	9008	Q96HC4	ArgAcetylD3	RGSQGDSKQQNGPPR	15	3	44.057	8	15		N-Term(ArgAcetylD3);K7(Acetyl:2H(3))	Acetyl:2H(3)@Any N-term;Acetyl:2H(3)@K	0;8	27	QE	-0.0358455	GSQGDSKQQNGPPR	0.983427	0.986356	0.894716	0.702905	8	0.994386	0.976913	1	RR	TRUE	trypsin	3	14	2	0.125	0.176471
Low	[R].ePPPPR.[E]	HCD	0.51	0.82	1	-1.61	0	1	Sequest HT (2)	1	893.497	-7.3	44.4561	9168	9168	Q13127	ArgAcetylD3	REPPPPR	7	1	44.456	9	7		N-Term(ArgAcetylD3)	Acetyl:2H(3)@Any N-term	0	27	QE	-0.0322182	EPPPPR	0.293936	0.357309	0.232611	0.0604348	1	0.826185	0.229211	0	RN;PH;PS;NP;QR	TRUE	trypsin	0	2	6	0.75	0
High	[R].gSQGDSkQQNGPPR.[K]	HCD	3.62	1.3e-05	2.8e-07	2.16	0.73	1	Sequest HT (2)	2	851.431	0.68	44.5313	9201	9201	Q96HC4	ArgAcetylD3	RGSQGDSKQQNGPPR	15	2	44.531	10	15		N-Term(ArgAcetylD3);K7(Acetyl:2H(3))	Acetyl:2H(3)@Any N-term;Acetyl:2H(3)@K	0;8	27	QE	-0.0315364	GSQGDSKQQNGPPR	0.963445	0.966009	0.833538	0.281442	5	0.96371	0.96532	1	RR	TRUE	trypsin	8	7	2	0.222222	0.533333
High	[R].gSQGDSkQQNGPPR.[K]	HCD	4.42	0.00011	0.00036	0.788	0.64	1	Sequest HT (2)	3	567.956	0.39	44.5931	9227	9227	Q96HC4	ArgAcetylD3	RGSQGDSKQQNGPPR	15	3	44.593	11	15		N-Term(ArgAcetylD3);K7(Acetyl:2H(3))	Acetyl:2H(3)@Any N-term;Acetyl:2H(3)@K	0;8	27	QE	-0.0309727	GSQGDSKQQNGPPR	0.980892	0.984346	0.88721	0.829358	8	0.980722	0.982931	1	RR	TRUE	trypsin	2	15	1	0.0625	0.117647
High	[R].gLDDDRGPR.[G]	HCD	3.11	0.00069	0.0059	0.356	0.46	1	Sequest HT (2)	3	401.208	-0.41	44.605	9233	9233	Q14152	ArgAcetylD3	RGLDDDRGPR	10	3	44.605	12	10		N-Term(ArgAcetylD3)	Acetyl:2H(3)@Any N-term	0	27	QE	-0.0308636	GLDDDRGPR	0.935022	0.945636	0.789119	0.472587	10	0.908367	0.936208	1	RR	TRUE	trypsin	5	14	2	0.125	0.263158
Low	[R].lGPGSSGGSAR.[E]	HCD	0.72	0.35	1	-0.533	0	1	Sequest HT (2)	2	573.806	-0.15	45.3769	9540	9540	P17152	ArgAcetylD3	RLGPGSSGGSAR	12	2	45.377	13	12		N-Term(ArgAcetylD3)	Acetyl:2H(3)@Any N-term	0	27	QE	-0.0238455	LGPGSSGGSAR	0.876192	0.87899	0.683564	0.492178	0	NA	0.936067	1	RR	TRUE	trypsin	0	5	5	0.5	0
High	[R].tRTEATDkkTSDQR.[N]	HCD	3.13	0.00085	0.0079	0.324	0.55	1	Sequest HT (2)	3	643.342	-0.94	45.4289	9560	9560	Q14244	ArgAcetylD3	RTRTEATDKKTSDQR	15	3	45.429	14	15		N-Term(ArgAcetylD3);K8(Acetyl:2H(3));K9(Acetyl:2H(3))	Acetyl:2H(3)@Any N-term;Acetyl:2H(3)@K;Acetyl:2H(3)@K	0;9;10	27	QE	-0.0233727	TRTEATDKKTSDQR	0.104552	0.180946	0.115832	0.308612	8	0.185598	0.00477505	NA	NA	FALSE	trypsin	6	8	2	0.2	0.428571
High	[R].lGGNPGTNSR.[V]	HCD	1.93	0.00025	0.0013	0.561	0.52	1	Sequest HT (2)	2	587.312	-0.25	45.6583	9653	9653	Q969G3	ArgAcetylD3	RLGGNPGTNSR	11	2	45.658	15	11		N-Term(ArgAcetylD3)	Acetyl:2H(3)@Any N-term	0	27	QE	-0.0212909	LGGNPGTNSR	0.820905	0.844815	0.640579	0.448218	3	0.601801	0.912289	0	YR	TRUE	trypsin	2	5	3	0.375	0.285714
High	[R].tGPPMGSR.[F]	HCD	1.8	0.001	0.0094	0.304	0.27	1	Sequest HT (2)	2	502.263	-0.14	45.8678	9741	9741	Q15056	ArgAcetylD3	RTGPPMGSR	9	2	45.868	16	9		N-Term(ArgAcetylD3)	Acetyl:2H(3)@Any N-term	0	27	QE	-0.0193818	TGPPMGSR	0.839716	0.875731	0.67924	0.381965	7	0.100154	0.918833	1	RR	TRUE	trypsin	2	11	3	0.214286	0.153846
High	[R].aLDDTARER.[A]	HCD	2.3	0.00022	0.0011	0.583	0.2	1	Sequest HT (2)	3	416.556	-0.1	46.0946	9832	9832	P20700	ArgAcetylD3	RALDDTARER	10	3	46.095	17	10		N-Term(ArgAcetylD3)	Acetyl:2H(3)@Any N-term	0	27	QE	-0.0173182	ALDDTARER	0.959963	0.965751	0.832904	0.605019	6	0.961657	0.959051	1	RR	TRUE	trypsin	1	13	3	0.1875	0.0714286
Medium	[R].tGPPMGSR.[F]	HCD	1.48	0.013	0.2	-0.038	0.24	1	Sequest HT (2)	2	502.263	0.08	46.3867	9947	9947	Q15056	ArgAcetylD3	RTGPPMGSR	9	2	46.387	18	9		N-Term(ArgAcetylD3)	Acetyl:2H(3)@Any N-term	0	27	QE	-0.0146636	TGPPMGSR	0.857506	0.875545	0.678994	0.268695	3	0.162744	0.916994	1	RR	TRUE	trypsin	1	9	5	0.357143	0.1
High	[R].dGGAAAAGPRPEQEPR.[A]	HCD	3.56	1.3e-05	1.2e-05	1.46	0.54	1	Sequest HT (2)	3	593.969	-0.66	46.9149	10158	10158	Q8NCN4	ArgAcetylD3	RDGGAAAAGPRPEQEPR	17	3	46.915	19	17		N-Term(ArgAcetylD3)	Acetyl:2H(3)@Any N-term	0	27	QE	-0.00986364	DGGAAAAGPRPEQEPR	0.971666	0.973708	0.853694	0.408173	11	0.984499	0.970519	1	RR	TRUE	trypsin	4	13	6	0.315789	0.235294
High	[R].gTREEQkELQR.[A]	HCD	2.91	0.00013	0.00055	0.709	0.36	1	Sequest HT (2)	3	540.629	-0.08	47.056	10216	10216	Q9Y314	ArgAcetylD3	RGTREEQKELQR	12	3	47.056	20	12		N-Term(ArgAcetylD3);K7(Acetyl:2H(3))	Acetyl:2H(3)@Any N-term;Acetyl:2H(3)@K	0;8	27	QE	-0.00858182	GTREEQKELQR	0.873269	0.895476	0.706329	0.670261	7	0.932441	0.87177	NA	NA	FALSE	trypsin	1	12	3	0.2	0.0769231
High	[R].kkIDRNPR.[V]	HCD	2.65	0.0044	0.06	0.107	0.41	1	Sequest HT (2)	3	439.94	0.27	47.4461	10378	10378	Q9NQZ2	ArgAcetylD3	RKKIDRNPR	9	3	47.446	21	9		N-Term(ArgAcetylD3);K1(Acetyl:2H(3));K2(Acetyl:2H(3))	Acetyl:2H(3)@Any N-term;Acetyl:2H(3)@K;Acetyl:2H(3)@K	0;2;3	27	QE	-0.00503636	KKIDRNPR	0.901996	0.92168	0.746366	0.519795	5	0.929456	0.905648	1	RR	TRUE	trypsin	0	9	5	0.357143	0
High	[R].aGAAcTLR.[Q]	HCD	2.92	0.00022	0.0011	0.588	0.45	1	Sequest HT (2)	2	510.776	0.23	47.4645	10386	10386	P30291	ArgAcetylD3	RAGAACTLR	9	2	47.464	22	9		N-Term(ArgAcetylD3);C5(Carbamidomethyl)	Acetyl:2H(3)@Any N-term;Carbamidomethyl@C	0;6	27	QE	-0.00487273	AGAACTLR	0.888614	0.906291	0.722196	0.493768	4	0.438355	0.926545	1	RR	TRUE	trypsin	2	10	2	0.166667	0.166667
High	[R].cDELTR.[K]	HCD	1.91	0.0042	0.057	0.111	0.34	1	Sequest HT (2)	2	497.744	-0.05	47.4808	10393	10393	P17844	ArgAcetylD3	RCDELTR	7	2	47.481	23	7		N-Term(ArgAcetylD3);C1(Carbamidomethyl)	Acetyl:2H(3)@Any N-term;Carbamidomethyl@C	0;2	27	QE	-0.00471818	CDELTR	0.959396	0.959956	0.81923	0.605652	5	0.837845	0.976838	1	RR	TRUE	trypsin	1	9	2	0.181818	0.1
High	[R].dQDNmQAELNR.[L]	HCD	1.53	0.0037	0.051	0.124	0.48	1	Sequest HT (2)	2	775.856	-0.88	47.5607	10425	10425	P33176	ArgAcetylD3	RDQDNMQAELNR	12	2	47.561	24	12		N-Term(ArgAcetylD3);M5(Oxidation)	Acetyl:2H(3)@Any N-term;Oxidation@M	0;6	27	QE	-0.00399091	DQDNMQAELNR	0.965075	0.966217	0.834052	0.495349	2	0.977744	0.946897	1	RR	TRUE	trypsin	0	6	6	0.5	0
High	[R].kPSSEEGkR.[S]	HCD	2.04	0.0007	0.0061	0.354	0.25	1	Sequest HT (2)	2	654.864	-0.84	47.6111	10447	10447	Q9Y613	ArgAcetylD3	RKPSSEEGKR	10	2	47.611	25	10		N-Term(ArgAcetylD3);K1(Acetyl:2H(3));K8(Acetyl:2H(3))	Acetyl:2H(3)@Any N-term;Acetyl:2H(3)@K;Acetyl:2H(3)@K	0;2;9	27	QE	-0.00353636	KPSSEEGKR	0.905197	0.922638	0.747942	0.598198	4	0.54762	0.962535	1	RR	TRUE	trypsin	0	9	4	0.307692	0
High	[R].akkVASR.[H]	HCD	1.42	0.00085	0.0078	0.324	0.44	1	Sequest HT (2)	2	525.84	-0.23	47.6696	10470	10470	Q14674	ArgAcetylD3	RAKKVASR	8	2	47.67	26	8		N-Term(ArgAcetylD3);K2(Acetyl:2H(3));K3(Acetyl:2H(3))	Acetyl:2H(3)@Any N-term;Acetyl:2H(3)@K;Acetyl:2H(3)@K	0;3;4	27	QE	-0.003	AKKVASR	0.944932	0.942286	0.782657	0.408867	3	0.472731	0.966428	1	RR	TRUE	trypsin	0	9	5	0.357143	0
High	[R].lEAEQAR.[E]	HCD	2.18	0.00057	0.0047	0.383	0.29	1	Sequest HT (2)	2	509.28	0.29	47.8908	10558	10558	Q14244	ArgAcetylD3	RLEAEQAR	8	2	47.891	27	8		N-Term(ArgAcetylD3)	Acetyl:2H(3)@Any N-term	0	27	QE	-0.000990909	LEAEQAR	0.847737	0.883987	0.690302	0.505747	4	0.554029	0.899604	1	RR	TRUE	trypsin	0	9	4	0.307692	0
High	[R].aLDDTAR.[E]	HCD	2.18	0.00039	0.0027	0.452	0.21	1	Sequest HT (2)	2	481.758	-0.13	48.0525	10625	10625	P20700	ArgAcetylD3	RALDDTAR	8	2	48.053	28	8		N-Term(ArgAcetylD3)	Acetyl:2H(3)@Any N-term	0	27	QE	0.000481818	ALDDTAR	0.914586	0.936208	0.771379	0.622879	5	0.825597	0.941687	1	RR	TRUE	trypsin	1	10	2	0.166667	0.0909091
High	[R].gPEEDRFSR.[G]	HCD	2.81	0.0003	0.0017	0.52	0.48	1	Sequest HT (2)	3	431.884	-0.13	48.153	10667	10667	Q14152	ArgAcetylD3	RGPEEDRFSR	10	3	48.153	29	10		N-Term(ArgAcetylD3)	Acetyl:2H(3)@Any N-term	0	27	QE	0.00139091	GPEEDRFSR	0.847855	0.884561	0.691084	0.759717	6	0.84507	0.841489	1	RR	TRUE	trypsin	0	14	2	0.125	0
High	[R].lAEQAER.[Y]	HCD	1.48	0.0034	0.046	0.134	0.1	1	Sequest HT (2)	2	509.279	-1.36	48.534	10829	10829	P61981; Q04917	ArgAcetylD3	RLAEQAER	8	2	48.534	30	8		N-Term(ArgAcetylD3)	Acetyl:2H(3)@Any N-term	0	27	QE	0.00485455	LAEQAER	0.936358	0.935725	0.770507	0.535577	4	0.590434	0.967137	0	AK;AK;AK;AR;AK;AR;AK	TRUE	trypsin	1	9	2	0.181818	0.1
High	[R].sAQDGPAPAEkR.[S]	HCD	2.48	0.00046	0.0034	0.423	0.49	1	Sequest HT (2)	2	736.889	-0.89	48.5546	10837	10837	Q9BQ52	ArgAcetylD3	RSAQDGPAPAEKR	13	2	48.555	31	13		N-Term(ArgAcetylD3);K11(Acetyl:2H(3))	Acetyl:2H(3)@Any N-term;Acetyl:2H(3)@K	0;12	27	QE	0.00504545	SAQDGPAPAEKR	0.987646	0.9888	0.904631	0.8382	4	0.990696	0.986176	1	RR	TRUE	trypsin	0	10	2	0.166667	0
Medium	[R].gPEEDRFSR.[G]	HCD	1.83	0.015	0.22	-0.051	0.19	1	Sequest HT (2)	3	431.884	0.53	48.687	10896	10896	Q14152	ArgAcetylD3	RGPEEDRFSR	10	3	48.687	32	10		N-Term(ArgAcetylD3)	Acetyl:2H(3)@Any N-term	0	27	QE	0.00624545	GPEEDRFSR	0.840236	0.861	0.660323	0.606564	7	0.807549	0.840142	1	RR	TRUE	trypsin	1	13	3	0.1875	0.0714286
High	[R].aELEASR.[S]	HCD	2.17	0.0015	0.015	0.251	0.28	1	Sequest HT (2)	2	488.766	0.46	48.8408	10965	10965	Q9H254	ArgAcetylD3	RAELEASR	8	2	48.841	33	8		N-Term(ArgAcetylD3)	Acetyl:2H(3)@Any N-term	0	27	QE	0.00764545	AELEASR	0.544209	0.632137	0.435644	0.281335	4	0.25187	0.559944	1	RR	TRUE	trypsin	0	9	4	0.307692	0
Medium	[R].sVSDNDIR.[K]	HCD	1.73	0.016	0.24	-0.061	0.16	1	Sequest HT (2)	2	553.785	0.57	48.8671	10976	10976	P55072	ArgAcetylD3	RSVSDNDIR	9	2	48.867	34	9		N-Term(ArgAcetylD3)	Acetyl:2H(3)@Any N-term	0	27	QE	0.00788182	SVSDNDIR	0.982788	0.984799	0.888858	0.439883	5	0.933641	0.996303	1	RR	TRUE	trypsin	2	9	3	0.25	0.181818
High	[R].sVSDNDIR.[K]	HCD	1.23	0.0075	0.11	0.04	0.29	1	Sequest HT (2)	1	1106.57	3.18	48.9781	11022	11022	P55072	ArgAcetylD3	RSVSDNDIR	9	1	48.978	35	9		N-Term(ArgAcetylD3)	Acetyl:2H(3)@Any N-term	0	27	QE	0.00889091	SVSDNDIR	0.595239	0.642136	0.443903	0.611254	3	0.856176	0.999453	1	RR	TRUE	trypsin	1	5	2	0.285714	0.166667
High	[R].vPEEASTNR.[A]	HCD	2.42	0.00011	0.00041	0.764	0.49	1	Sequest HT (2)	2	602.311	-0.26	49.197	11109	11109	Q2TAM9	ArgAcetylD3	RVPEEASTNR	10	2	49.197	36	10		N-Term(ArgAcetylD3)	Acetyl:2H(3)@Any N-term	0	27	QE	0.0108818	VPEEASTNR	0.837951	0.865184	0.665597	0.599743	5	0.241606	0.970405	1	RR	TRUE	trypsin	0	10	4	0.285714	0
High	[R].qQEEMMR.[Q]	HCD	2.53	0.00012	0.00046	0.743	0.48	1	Sequest HT (2)	2	576.77	0.06	49.2833	11148	11148	Q15233	ArgAcetylD3	RQQEEMMR	8	2	49.283	37	8		N-Term(ArgAcetylD3)	Acetyl:2H(3)@Any N-term	0	27	QE	0.0116636	QQEEMMR	0.929263	0.945656	0.789158	0.607006	5	0.803845	0.969989	1	RR	TRUE	trypsin	1	10	2	0.166667	0.0909091
High	[R].eGkQkADkNR.[A]	HCD	1.63	0.0034	0.047	0.133	0.32	1	Sequest HT (2)	2	755.431	1.35	49.3785	11193	11193	Q96A33	ArgAcetylD3	REGKQKADKNR	11	2	49.379	38	11		N-Term(ArgAcetylD3);K3(Acetyl:2H(3));K5(Acetyl:2H(3));K8(Acetyl:2H(3))	Acetyl:2H(3)@Any N-term;Acetyl:2H(3)@K;Acetyl:2H(3)@K;Acetyl:2H(3)@K	0;4;6;9	27	QE	0.0125364	EGKQKADKNR	0.968607	0.968713	0.840331	0.278236	1	0.974737	0.964993	0	NR	TRUE	trypsin	0	5	8	0.615385	0
Medium	[R].sVSDNDIR.[K]	HCD	1.72	0.039	0.52	-0.178	0.12	1	Sequest HT (2)	2	553.786	1.03	49.3927	11198	11198	P55072	ArgAcetylD3	RSVSDNDIR	9	2	49.393	39	9		N-Term(ArgAcetylD3)	Acetyl:2H(3)@Any N-term	0	27	QE	0.0126636	SVSDNDIR	0.969475	0.972646	0.850755	0.220125	4	0.904408	0.985519	1	RR	TRUE	trypsin	2	7	5	0.416667	0.222222
High	[R].aSVGQDSPEPR.[S]	HCD	2.49	5e-05	0.00011	1.02	0.42	1	Sequest HT (2)	2	672.34	-0.71	49.407	11206	11206	Q6UX71	ArgAcetylD3	RASVGQDSPEPR	12	2	49.407	40	12		N-Term(ArgAcetylD3)	Acetyl:2H(3)@Any N-term	0	27	QE	0.0127909	ASVGQDSPEPR	0.983334	0.985319	0.890779	0.47019	4	0.961656	0.992344	0	NR	TRUE	trypsin	3	8	3	0.272727	0.272727
Medium	[R].qPkYPR.[K]	HCD	1.79	0.017	0.26	-0.071	0.19	1	Sequest HT (2)	2	517.805	0.72	49.4252	11214	11214	P62750	ArgAcetylD3	RQPKYPR	7	2	49.425	41	7		N-Term(ArgAcetylD3);K3(Acetyl:2H(3))	Acetyl:2H(3)@Any N-term;Acetyl:2H(3)@K	0;4	27	QE	0.0129545	QPKYPR	0.770305	0.834652	0.628662	0.674348	3	0.367276	0.927943	1	RR	TRUE	trypsin	0	8	2	0.2	0
High	[R].hTAGkAIVDSR.[S]	HCD	3.13	0.00035	0.0023	0.477	0.56	1	Sequest HT (2)	3	467.6	-1.5	49.9247	11433	11433	Q8WWK9	ArgAcetylD3	RHTAGKAIVDSR	12	3	49.925	42	12		N-Term(ArgAcetylD3);K5(Acetyl:2H(3))	Acetyl:2H(3)@Any N-term;Acetyl:2H(3)@K	0;6	27	QE	0.0175	HTAGKAIVDSR	0.976722	0.980746	0.874872	0.639605	8	0.975784	0.978295	1	RR	TRUE	trypsin	1	14	5	0.263158	0.0666667
Low	[R].eDYVGGQSHR.[S]	HCD	1.37	0.36	1	-0.542	0.38	1	Sequest HT (2)	2	674.822	-5.06	50.617	11723	11723	Q7Z6E9	ArgAcetylD3	REDYVGGQSHR	11	2	50.617	43	11		N-Term(ArgAcetylD3)	Acetyl:2H(3)@Any N-term	0	27	QE	0.0237909	EDYVGGQSHR	0.694738	0.720224	0.511922	-0.110413	3	0.170532	0.873082	1	RR	TRUE	trypsin	2	2	8	0.8	0.5
High	[R].kQEEALR.[Q]	HCD	2.34	0.0017	0.017	0.236	0.33	1	Sequest HT (2)	2	560.324	0.92	50.846	11824	11824	Q6Y7W6	ArgAcetylD3	RKQEEALR	8	2	50.846	44	8		N-Term(ArgAcetylD3);K1(Acetyl:2H(3))	Acetyl:2H(3)@Any N-term;Acetyl:2H(3)@K	0;2	27	QE	0.0258727	KQEEALR	0.982159	0.982496	0.88071	0.6185	4	0.905179	0.988986	1	RR	TRUE	trypsin	0	9	4	0.307692	0
High	[R].akVYGR.[G]	HCD	1.52	0.0012	0.013	0.271	0.14	1	Sequest HT (2)	2	470.286	1.36	50.9328	11864	11864	O75369	ArgAcetylD3	RAKVYGR	7	2	50.933	45	7		N-Term(ArgAcetylD3);K2(Acetyl:2H(3))	Acetyl:2H(3)@Any N-term;Acetyl:2H(3)@K	0;3	27	QE	0.0266636	AKVYGR	0.901502	0.926744	0.754809	0.533478	5	0.585964	0.932427	1	RR	TRUE	trypsin	1	9	2	0.181818	0.1
High	[R].yRESkkIDR.[H]	HCD	3.04	0.00015	0.00063	0.683	0.41	1	Sequest HT (2)	3	495.954	-0.13	52.538	12528	12528	P84098	ArgAcetylD3	RYRESKKIDR	10	3	52.538	46	10		N-Term(ArgAcetylD3);K5(Acetyl:2H(3));K6(Acetyl:2H(3))	Acetyl:2H(3)@Any N-term;Acetyl:2H(3)@K;Acetyl:2H(3)@K	0;6;7	27	QE	0.0412545	YRESKKIDR	0.943702	0.951976	0.801903	0.130502	6	0.806037	0.969003	1	RR	TRUE	trypsin	3	9	6	0.4	0.25
High	[R].qkkTkkQkR.[L]	HCD	3.13	0.00025	0.0012	0.567	0.27	1	Sequest HT (2)	3	533.683	-0.13	53.6853	13034	13034	P56182	ArgAcetylD3	RQKKTKKQKR	10	3	53.685	47	10		N-Term(ArgAcetylD3);K2(Acetyl:2H(3));K3(Acetyl:2H(3));K5(Acetyl:2H(3));K6(Acetyl:2H(3));K8(Acetyl:2H(3))	Acetyl:2H(3)@Any N-term;Acetyl:2H(3)@K;Acetyl:2H(3)@K;Acetyl:2H(3)@K;Acetyl:2H(3)@K;Acetyl:2H(3)@K	0;3;4;6;7;9	27	QE	0.0516818	QKKTKKQKR	0.983793	0.987147	0.897822	0.849678	6	0.892058	0.989062	1	RR	TRUE	trypsin	1	13	1	0.0714286	0.0714286
High	[R].qkkTkkQkR.[L]	HCD	3.54	1.3e-05	2.3e-05	1.33	0.47	1	Sequest HT (2)	2	800.021	-1	53.7369	13056	13056	P56182	ArgAcetylD3	RQKKTKKQKR	10	2	53.737	48	10		N-Term(ArgAcetylD3);K2(Acetyl:2H(3));K3(Acetyl:2H(3));K5(Acetyl:2H(3));K6(Acetyl:2H(3));K8(Acetyl:2H(3))	Acetyl:2H(3)@Any N-term;Acetyl:2H(3)@K;Acetyl:2H(3)@K;Acetyl:2H(3)@K;Acetyl:2H(3)@K;Acetyl:2H(3)@K	0;3;4;6;7;9	27	QE	0.0521545	QKKTKKQKR	0.828203	0.853822	0.651443	0.450322	2	0.484371	0.867649	1	RR	TRUE	trypsin	2	8	3	0.272727	0.2
High	[R].eEkQRQELEkTR.[K]	HCD	3.71	8.3e-05	0.00028	0.836	0.52	1	Sequest HT (2)	3	622.344	-0.92	53.7952	13082	13082	P35579	ArgAcetylD3	REEKQRQELEKTR	13	3	53.795	49	13		N-Term(ArgAcetylD3);K3(Acetyl:2H(3));K10(Acetyl:2H(3))	Acetyl:2H(3)@Any N-term;Acetyl:2H(3)@K;Acetyl:2H(3)@K	0;4;11	27	QE	0.0526818	EEKQRQELEKTR	0.833047	0.875861	0.679412	0.763298	6	0.872289	0.815388	1	RR	TRUE	trypsin	0	15	3	0.166667	0
Medium	[R].sEDEPPAASASAAPPPQR.[D]	HCD	1.73	0.012	0.18	-0.026	0.54	1	Sequest HT (2)	2	989.986	-0.81	56.096	14064	14064	Q96IZ0	ArgAcetylD3	RSEDEPPAASASAAPPPQR	19	2	56.096	50	19		N-Term(ArgAcetylD3)	Acetyl:2H(3)@Any N-term	0	27	QE	0.0736	SEDEPPAASASAAPPPQR	0.917526	0.925234	0.752264	0.739871	4	0.908006	0.962237	1	RR	TRUE	trypsin	1	8	3	0.272727	0.111111
High	[R].qEkmADPESNQEAVNSSAAR.[T]	HCD	3.49	1.3e-05	8.4e-06	1.52	0.68	1	Sequest HT (2)	3	808.715	-1.07	56.5512	14253	14253	Q14669	ArgAcetylD3	RQEKMADPESNQEAVNSSAAR	21	3	56.551	51	21		N-Term(ArgAcetylD3);K3(Acetyl:2H(3));M4(Oxidation)	Acetyl:2H(3)@Any N-term;Acetyl:2H(3)@K;Oxidation@M	0;4;5	27	QE	0.0777364	QEKMADPESNQEAVNSSAAR	0.975778	0.97819	0.866797	0.54666	7	0.988144	0.981376	1	RR	TRUE	trypsin	1	19	11	0.366667	0.05
High	[R].kmADLHAVPR.[G]	HCD	2.39	0.00029	0.0017	0.522	0.35	1	Sequest HT (2)	3	467.263	-0.92	57.0089	14439	14439	Q14195	ArgAcetylD3	RKMADLHAVPR	11	3	57.009	52	11		N-Term(ArgAcetylD3);K1(Acetyl:2H(3));M2(Oxidation)	Acetyl:2H(3)@Any N-term;Acetyl:2H(3)@K;Oxidation@M	0;2;3	27	QE	0.0819	KMADLHAVPR	0.97118	0.976176	0.860757	0.709569	6	0.964903	0.968887	1	RR	TRUE	trypsin	2	12	2	0.142857	0.142857
Medium	[R].sckTAPASSSkSQTEVPkRGGR.[K]	HCD	1.38	0.018	0.28	-0.079	0.46	1	Sequest HT (2)	3	885.805	-0.85	57.1496	14498	14498	P46013	ArgAcetylD3	RSCKTAPASSSKSQTEVPKRGGR	23	3	57.15	53	23		N-Term(ArgAcetylD3);C2(Carbamidomethyl);K3(Acetyl:2H(3));K11(Acetyl:2H(3));K18(Acetyl:2H(3))	Acetyl:2H(3)@Any N-term;Carbamidomethyl@C;Acetyl:2H(3)@K;Acetyl:2H(3)@K;Acetyl:2H(3)@K	0;3;4;12;19	27	QE	0.0831818	SCKTAPASSSKSQTEVPKRGGR	0.96438	0.96602	0.833566	0.716653	1	0.991837	0.959418	1	RR	TRUE	trypsin	0	5	5	0.5	0
High	[R].skSDGEAkPEPSPSPR.[I]	HCD	3.39	1.3e-05	1.7e-05	1.38	0.63	1	Sequest HT (2)	3	654.008	0.05	57.9118	14819	14819	P26358	ArgAcetylD3	RSKSDGEAKPEPSPSPR	17	3	57.912	54	17		N-Term(ArgAcetylD3);K2(Acetyl:2H(3));K8(Acetyl:2H(3))	Acetyl:2H(3)@Any N-term;Acetyl:2H(3)@K;Acetyl:2H(3)@K	0;3;9	27	QE	0.0901091	SKSDGEAKPEPSPSPR	0.992875	0.993206	0.925751	0.657692	5	0.971688	0.995965	1	RR	TRUE	trypsin	3	16	4	0.2	0.157895
High	[R].skSDGEAkPEPSPSPR.[I]	HCD	2.63	0.00057	0.0047	0.384	0.6	1	Sequest HT (2)	2	980.504	-3.43	57.93	14826	14826	P26358	ArgAcetylD3	RSKSDGEAKPEPSPSPR	17	2	57.93	55	17		N-Term(ArgAcetylD3);K2(Acetyl:2H(3));K8(Acetyl:2H(3))	Acetyl:2H(3)@Any N-term;Acetyl:2H(3)@K;Acetyl:2H(3)@K	0;3;9	27	QE	0.0902727	SKSDGEAKPEPSPSPR	0.98746	0.988669	0.904071	0.875939	4	0.998879	0.974985	1	RR	TRUE	trypsin	0	11	2	0.153846	0
Medium	[R].kWEAAR.[EA]	HCD	2.16	0.011	0.17	-0.017	0.29	1	Sequest HT (2)	2	503.788	-0.97	58.3894	15024	15024	P01889; P01893	ArgAcetylD3	RKWEAAR	7	2	58.389	56	7		N-Term(ArgAcetylD3);K1(Acetyl:2H(3))	Acetyl:2H(3)@Any N-term;Acetyl:2H(3)@K	0;2	27	QE	0.0944455	KWEAAR	0.955103	0.964279	0.829329	0.260435	5	0.780654	0.965763	0.5	QR;KR	TRUE	trypsin	3	7	4	0.363636	0.3
High	[R].qSIAkEkEER.[L]	HCD	2.77	0.00022	0.001	0.599	0.53	1	Sequest HT (2)	2	754.924	2.33	58.5431	15089	15089	Q8NFC6	ArgAcetylD3	RQSIAKEKEER	11	2	58.543	57	11		N-Term(ArgAcetylD3);K5(Acetyl:2H(3));K7(Acetyl:2H(3))	Acetyl:2H(3)@Any N-term;Acetyl:2H(3)@K;Acetyl:2H(3)@K	0;6;8	27	QE	0.0958455	QSIAKEKEER	0.899835	0.912781	0.732139	0.437617	5	0.467634	0.964306	1	RR	TRUE	trypsin	2	11	4	0.266667	0.153846
High	[R].dPSASPGDAGEQAIR.[Q]	HCD	1.67	0.0015	0.015	0.252	0.46	1	Sequest HT (2)	2	836.411	1.2	58.7216	15154	15154	P18206	ArgAcetylD3	RDPSASPGDAGEQAIR	16	2	58.722	58	16		N-Term(ArgAcetylD3)	Acetyl:2H(3)@Any N-term	0	27	QE	0.0974727	DPSASPGDAGEQAIR	0.970464	0.972792	0.851156	0.670575	4	0.958001	0.981914	0	LR	TRUE	trypsin	0	9	5	0.357143	0
High	[R].dQDNMQAELNR.[L]	HCD	3.69	1.3e-05	4.9e-07	2.06	0.55	1	Sequest HT (2)	2	767.858	-0.81	59.7881	15595	15595	P33176	ArgAcetylD3	RDQDNMQAELNR	12	2	59.788	59	12		N-Term(ArgAcetylD3)	Acetyl:2H(3)@Any N-term	0	27	QE	0.107164	DQDNMQAELNR	0.974506	0.980559	0.874264	0.694715	8	0.963427	0.983004	1	RR	TRUE	trypsin	1	17	4	0.190476	0.0555556
High	[R].vEILNEHR.[G]	HCD	3.4	0.00049	0.004	0.405	0.03	1	Sequest HT (2)	3	404.23	0.96	60.0265	15706	15706	Q9NTJ3	ArgAcetylD3	RVEILNEHR	9	3	60.026	60	9		N-Term(ArgAcetylD3)	Acetyl:2H(3)@Any N-term	0	27	QE	0.109327	VEILNEHR	0.990101	0.992044	0.919641	0.773277	5	0.995344	0.979636	1	RR	TRUE	trypsin	1	13	2	0.133333	0.0714286
High	[R].eNQVLSVR.[I]	HCD	3.15	0.00034	0.0021	0.489	0.43	1	Sequest HT (2)	2	573.327	-0.49	60.1825	15777	15777	Q10589	ArgAcetylD3	RENQVLSVR	9	2	60.182	61	9		N-Term(ArgAcetylD3)	Acetyl:2H(3)@Any N-term	0	27	QE	0.110745	ENQVLSVR	0.944928	0.953233	0.804533	0.345125	5	0.650242	0.963031	1	RR	TRUE	trypsin	2	10	4	0.285714	0.166667
High	[R].dFAPPGQQkR.[E]	HCD	2.74	0.00011	0.00039	0.772	0.5	1	Sequest HT (2)	2	695.379	-0.17	61.715	16411	16411	Q9BVC6	ArgAcetylD3	RDFAPPGQQKR	11	2	61.715	62	11		N-Term(ArgAcetylD3);K9(Acetyl:2H(3))	Acetyl:2H(3)@Any N-term;Acetyl:2H(3)@K	0;10	27	QE	0.124682	DFAPPGQQKR	0.946123	0.955228	0.80878	0.462289	5	0.826986	0.979416	1	RR	TRUE	trypsin	3	8	3	0.272727	0.272727
High	[R].dFAPPGQQkR.[E]	HCD	3.63	8.3e-05	0.00027	0.845	0.63	1	Sequest HT (2)	3	463.922	0.53	61.7655	16432	16432	Q9BVC6	ArgAcetylD3	RDFAPPGQQKR	11	3	61.766	63	11		N-Term(ArgAcetylD3);K9(Acetyl:2H(3))	Acetyl:2H(3)@Any N-term;Acetyl:2H(3)@K	0;10	27	QE	0.125145	DFAPPGQQKR	0.947796	0.95547	0.809302	0.383114	6	0.990635	0.847559	1	RR	TRUE	trypsin	6	10	2	0.166667	0.375
Medium	[R].kkEITVR.[G]	HCD	2.19	0.012	0.17	-0.021	0.55	1	Sequest HT (2)	2	582.874	-0.45	62.3553	16681	16681	Q92841	ArgAcetylD3	RKKEITVR	8	2	62.355	64	8		N-Term(ArgAcetylD3);K1(Acetyl:2H(3));K2(Acetyl:2H(3))	Acetyl:2H(3)@Any N-term;Acetyl:2H(3)@K;Acetyl:2H(3)@K	0;2;3	27	QE	0.1305	KKEITVR	0.955608	0.961758	0.823372	0.257252	6	0.787555	0.974219	1	RR	TRUE	trypsin	1	8	6	0.428571	0.111111
High	[R].kSLLTR.[K]	HCD	2.16	0.003	0.04	0.151	0.13	1	Sequest HT (2)	2	482.314	-1.47	62.5983	16789	16789	Q9H4A6	ArgAcetylD3	RKSLLTR	7	2	62.598	65	7		N-Term(ArgAcetylD3);K1(Acetyl:2H(3))	Acetyl:2H(3)@Any N-term;Acetyl:2H(3)@K	0;2	27	QE	0.132709	KSLLTR	0.966666	0.971739	0.848289	0.643913	3	0.789877	0.975411	0.333333	YH;RR;GF	TRUE	trypsin	0	8	2	0.2	0
High	[R].eLQSAVPR.[D]	HCD	2.68	0.00022	0.001	0.596	0.49	1	Sequest HT (2)	2	550.817	1.12	62.6818	16823	16823	Q13895	ArgAcetylD3	RELQSAVPR	9	2	62.682	66	9		N-Term(ArgAcetylD3)	Acetyl:2H(3)@Any N-term	0	27	QE	0.133473	ELQSAVPR	0.879039	0.902516	0.716565	0.642412	2	0.882506	0.875516	1	RR	TRUE	trypsin	1	7	2	0.222222	0.125
High	[R].cESkkFGGPGAR.[A]	HCD	2.54	0.00011	0.00035	0.792	0.46	1	Sequest HT (2)	3	528.947	0.45	62.8052	16876	16876	P62249	ArgAcetylD3	RCESKKFGGPGAR	13	3	62.805	67	13		N-Term(ArgAcetylD3);C1(Carbamidomethyl);K4(Acetyl:2H(3));K5(Acetyl:2H(3))	Acetyl:2H(3)@Any N-term;Carbamidomethyl@C;Acetyl:2H(3)@K;Acetyl:2H(3)@K	0;2;5;6	27	QE	0.134591	CESKKFGGPGAR	0.969463	0.973628	0.853469	0.612516	7	0.965501	0.968126	1	RR	TRUE	trypsin	4	12	2	0.142857	0.25
High	[R].cESkkFGGPGAR.[A]	HCD	3.81	1.3e-05	5.5e-06	1.6	0.57	1	Sequest HT (2)	2	792.917	-0.04	62.8644	16902	16902	P62249	ArgAcetylD3	RCESKKFGGPGAR	13	2	62.864	68	13		N-Term(ArgAcetylD3);C1(Carbamidomethyl);K4(Acetyl:2H(3));K5(Acetyl:2H(3))	Acetyl:2H(3)@Any N-term;Carbamidomethyl@C;Acetyl:2H(3)@K;Acetyl:2H(3)@K	0;2;5;6	27	QE	0.135127	CESKKFGGPGAR	0.85562	0.88349	0.689626	0.600087	5	0.668841	0.896577	1	RR	TRUE	trypsin	2	11	3	0.214286	0.153846
High	[R].dFAPPGQQkR.[E]	HCD	2.15	0.0031	0.04	0.149	0.48	1	Sequest HT (2)	2	695.38	1.25	62.9114	16921	16921	Q9BVC6	ArgAcetylD3	RDFAPPGQQKR	11	2	62.911	69	11		N-Term(ArgAcetylD3);K9(Acetyl:2H(3))	Acetyl:2H(3)@Any N-term;Acetyl:2H(3)@K	0;10	27	QE	0.135555	DFAPPGQQKR	0.542645	0.601197	0.410619	0.463039	4	0.669876	0.626729	1	RR	TRUE	trypsin	3	8	3	0.272727	0.272727
High	[R].vAAMSVAAR.[V]	HCD	2.13	0.00058	0.0049	0.378	0.39	1	Sequest HT (2)	2	538.806	-2.77	62.988	16953	16953	O60231	ArgAcetylD3	RVAAMSVAAR	10	2	62.988	70	10		N-Term(ArgAcetylD3)	Acetyl:2H(3)@Any N-term	0	27	QE	0.136255	VAAMSVAAR	0.911333	0.921736	0.746458	0.487259	4	0.481533	0.9466	1	RR	TRUE	trypsin	2	9	2	0.181818	0.181818
High	[R].qEkMADPESNQEAVNSSAAR.[T]	HCD	5.69	1.3e-05	6.1e-06	1.58	0.65	1	Sequest HT (2)	3	803.384	-0.63	63.2327	17061	17061	Q14669	ArgAcetylD3	RQEKMADPESNQEAVNSSAAR	21	3	63.233	71	21		N-Term(ArgAcetylD3);K3(Acetyl:2H(3))	Acetyl:2H(3)@Any N-term;Acetyl:2H(3)@K	0;4	27	QE	0.138482	QEKMADPESNQEAVNSSAAR	0.99628	0.996687	0.948167	0.742827	10	0.99839	0.992314	1	RR	TRUE	trypsin	1	22	6	0.214286	0.0434783
High	[R].cESkkFGGPGAR.[A]	HCD	2.72	0.00011	0.00042	0.761	0.54	1	Sequest HT (2)	3	528.947	1.03	63.3133	17095	17095	P62249	ArgAcetylD3	RCESKKFGGPGAR	13	3	63.313	72	13		N-Term(ArgAcetylD3);C1(Carbamidomethyl);K4(Acetyl:2H(3));K5(Acetyl:2H(3))	Acetyl:2H(3)@Any N-term;Carbamidomethyl@C;Acetyl:2H(3)@K;Acetyl:2H(3)@K	0;2;5;6	27	QE	0.139209	CESKKFGGPGAR	0.989781	0.990763	0.913406	0.677215	6	0.977268	0.992498	1	RR	TRUE	trypsin	3	12	2	0.142857	0.2
High	[R].cESkkFGGPGAR.[A]	HCD	2.04	0.0015	0.015	0.252	0.28	1	Sequest HT (2)	2	792.912	-5.58	63.3985	17134	17134	P62249	ArgAcetylD3	RCESKKFGGPGAR	13	2	63.398	73	13		N-Term(ArgAcetylD3);C1(Carbamidomethyl);K4(Acetyl:2H(3));K5(Acetyl:2H(3))	Acetyl:2H(3)@Any N-term;Carbamidomethyl@C;Acetyl:2H(3)@K;Acetyl:2H(3)@K	0;2;5;6	27	QE	0.139982	CESKKFGGPGAR	0.822824	0.833232	0.627025	0.404527	2	0.514344	0.861615	1	RR	TRUE	trypsin	0	7	7	0.5	0
High	[R].lRENQVLSVR.[I]	HCD	3.62	0.00015	0.00067	0.672	0.47	1	Sequest HT (2)	3	472.281	-2.03	63.5172	17178	17178	Q10589	ArgAcetylD3	RLRENQVLSVR	11	3	63.517	74	11		N-Term(ArgAcetylD3)	Acetyl:2H(3)@Any N-term	0	27	QE	0.141064	LRENQVLSVR	0.92336	0.936958	0.772742	0.655535	8	0.751804	0.964393	NA	NA	FALSE	trypsin	2	13	2	0.133333	0.133333
High	[R].lEHSkNVNTEkLR.[A]	HCD	4.72	1.3e-05	2.6e-05	1.31	0.58	1	Sequest HT (2)	3	620.353	0.5	63.7566	17282	17282	O60841	ArgAcetylD3	RLEHSKNVNTEKLR	14	3	63.757	75	14		N-Term(ArgAcetylD3);K5(Acetyl:2H(3));K11(Acetyl:2H(3))	Acetyl:2H(3)@Any N-term;Acetyl:2H(3)@K;Acetyl:2H(3)@K	0;6;12	27	QE	0.143245	LEHSKNVNTEKLR	0.976534	0.981171	0.876265	0.701101	10	0.956056	0.998791	1	RR	TRUE	trypsin	1	18	5	0.217391	0.0526316
High	[R].vVSEGGkPkVR.[V]	HCD	2.91	0.00012	0.00042	0.757	0.59	1	Sequest HT (2)	2	723.941	1.05	63.8546	17328	17328	P17066	ArgAcetylD3	RVVSEGGKPKVR	12	2	63.855	76	12		N-Term(ArgAcetylD3);K7(Acetyl:2H(3));K9(Acetyl:2H(3))	Acetyl:2H(3)@Any N-term;Acetyl:2H(3)@K;Acetyl:2H(3)@K	0;8;10	27	QE	0.144136	VVSEGGKPKVR	0.936227	0.943755	0.785467	0.718675	2	0.727251	0.972887	0	FQ;FR	TRUE	trypsin	0	8	3	0.272727	0
High	[R].aEIkQGIR.[E]	HCD	2.39	0.0019	0.021	0.215	0.58	1	Sequest HT (2)	2	580.855	0.35	63.9178	17358	17358	O00560	ArgAcetylD3	RAEIKQGIR	9	2	63.918	77	9		N-Term(ArgAcetylD3);K4(Acetyl:2H(3))	Acetyl:2H(3)@Any N-term;Acetyl:2H(3)@K	0;5	27	QE	0.144709	AEIKQGIR	0.890595	0.907794	0.724469	0.296738	5	0.392004	0.954469	1	RR	TRUE	trypsin	1	9	6	0.4	0.1
High	[R].lQGQLEQGDDTAAER.[L]	HCD	4.11	1.3e-05	3.2e-05	1.27	0.73	1	Sequest HT (2)	3	611.301	-4.31	64.487	17605	17605	Q8NE71	ArgAcetylD3	RLQGQLEQGDDTAAER	16	3	64.487	78	16		N-Term(ArgAcetylD3)	Acetyl:2H(3)@Any N-term	0	27	QE	0.149882	LQGQLEQGDDTAAER	0.988968	0.990964	0.914354	0.678188	9	0.994807	0.982144	1	RR	TRUE	trypsin	3	18	4	0.181818	0.142857
High	[R].lQGQLEQGDDTAAER.[L]	HCD	5.04	1.3e-05	3.4e-07	2.13	0.58	1	Sequest HT (2)	2	916.453	0.6	64.6	17657	17657	Q8NE71	ArgAcetylD3	RLQGQLEQGDDTAAER	16	2	64.6	79	16		N-Term(ArgAcetylD3)	Acetyl:2H(3)@Any N-term	0	27	QE	0.150909	LQGQLEQGDDTAAER	0.970433	0.974203	0.855083	0.541873	9	0.962712	0.975489	1	RR	TRUE	trypsin	6	13	2	0.133333	0.315789
High	[R].kVSSAEGAAkEEPkR.[S]	HCD	5.65	1.3e-05	4.1e-07	2.09	0.69	1	Sequest HT (2)	3	641.694	0.3	64.6519	17678	17678	P05114	ArgAcetylD3	RKVSSAEGAAKEEPKR	16	3	64.652	80	16		N-Term(ArgAcetylD3);K1(Acetyl:2H(3));K10(Acetyl:2H(3));K14(Acetyl:2H(3))	Acetyl:2H(3)@Any N-term;Acetyl:2H(3)@K;Acetyl:2H(3)@K;Acetyl:2H(3)@K	0;2;11;15	27	QE	0.151382	KVSSAEGAAKEEPKR	0.991631	0.993346	0.92652	0.798944	15	0.954078	0.999037	1	KR	TRUE	trypsin	5	23	1	0.0416667	0.178571
High	[R].kSALALR.[W]	HCD	1.51	0.00055	0.0046	0.386	0.39	1	Sequest HT (2)	2	502.827	-0.67	65.2018	17919	17919	Q9Y2D5	ArgAcetylD3	RKSALALR	8	2	65.202	81	8		N-Term(ArgAcetylD3);K1(Acetyl:2H(3))	Acetyl:2H(3)@Any N-term;Acetyl:2H(3)@K	0;2	27	QE	0.156382	KSALALR	0.952741	0.959256	0.817648	0.374932	5	0.749362	0.967229	1	RR	TRUE	trypsin	2	9	3	0.25	0.181818
High	[R].gGPISFSSSR.[S]	HCD	3.32	5.8e-05	0.00021	0.892	0.56	1	Sequest HT (2)	2	598.318	2.04	65.3174	17970	17970	P35580	ArgAcetylD3	RGGPISFSSSR	11	2	65.317	82	11		N-Term(ArgAcetylD3)	Acetyl:2H(3)@Any N-term	0	27	QE	0.157427	GGPISFSSSR	0.116246	0.257736	0.165953	-0.0178237	6	0.253712	0.061574	1	RR	TRUE	trypsin	5	8	5	0.384615	0.384615
High	[R].kkQkLAkER.[A]	HCD	3.29	5.8e-05	0.00016	0.948	0.65	1	Sequest HT (2)	2	755.488	-0.18	65.5218	18061	18061	Q15388	ArgAcetylD3	RKKQKLAKER	10	2	65.522	83	10		N-Term(ArgAcetylD3);K1(Acetyl:2H(3));K2(Acetyl:2H(3));K4(Acetyl:2H(3));K7(Acetyl:2H(3))	Acetyl:2H(3)@Any N-term;Acetyl:2H(3)@K;Acetyl:2H(3)@K;Acetyl:2H(3)@K;Acetyl:2H(3)@K	0;2;3;5;8	27	QE	0.159291	KKQKLAKER	0.976305	0.978897	0.86898	0.625354	2	0.847545	0.98461	1	RR	TRUE	trypsin	1	8	3	0.272727	0.111111
High	[R].kkQkLAkER.[A]	HCD	3.48	8.3e-05	0.00028	0.834	0.7	1	Sequest HT (2)	3	503.995	0.22	65.6148	18102	18102	Q15388	ArgAcetylD3	RKKQKLAKER	10	3	65.615	84	10		N-Term(ArgAcetylD3);K1(Acetyl:2H(3));K2(Acetyl:2H(3));K4(Acetyl:2H(3));K7(Acetyl:2H(3))	Acetyl:2H(3)@Any N-term;Acetyl:2H(3)@K;Acetyl:2H(3)@K;Acetyl:2H(3)@K;Acetyl:2H(3)@K	0;2;3;5;8	27	QE	0.160136	KKQKLAKER	0.988509	0.990623	0.912749	0.77426	5	0.933779	0.996052	1	RR	TRUE	trypsin	1	12	2	0.142857	0.0769231
High	[R].qLSSGVSEIR.[H]	HCD	2.82	0.00021	0.001	0.603	0.37	1	Sequest HT (2)	2	638.856	0.79	65.6801	18129	18129	P04792	ArgAcetylD3	RQLSSGVSEIR	11	2	65.68	85	11		N-Term(ArgAcetylD3)	Acetyl:2H(3)@Any N-term	0	27	QE	0.160727	QLSSGVSEIR	0.966521	0.971307	0.847127	0.664634	5	0.887169	0.982635	0	SR	TRUE	trypsin	1	11	2	0.153846	0.0833333
High	[R].kkQkLAkER.[A]	HCD	2.6	0.00017	0.00068	0.669	0.55	1	Sequest HT (2)	2	755.487	-1.78	66.0342	18292	18292	Q15388	ArgAcetylD3	RKKQKLAKER	10	2	66.034	86	10		N-Term(ArgAcetylD3);K1(Acetyl:2H(3));K2(Acetyl:2H(3));K4(Acetyl:2H(3));K7(Acetyl:2H(3))	Acetyl:2H(3)@Any N-term;Acetyl:2H(3)@K;Acetyl:2H(3)@K;Acetyl:2H(3)@K;Acetyl:2H(3)@K	0;2;3;5;8	27	QE	0.163945	KKQKLAKER	0.953978	0.959419	0.818015	0.562806	3	0.806703	0.96585	1	RR	TRUE	trypsin	1	8	3	0.272727	0.111111
High	[R].vAAMSVAkR.[V]	HCD	2.22	0.00049	0.004	0.403	0.32	1	Sequest HT (2)	2	589.851	0.2	66.1359	18337	18337	Q14562; Q92620	ArgAcetylD3	RVAAMSVAKR	10	2	66.136	87	10		N-Term(ArgAcetylD3);K8(Acetyl:2H(3))	Acetyl:2H(3)@Any N-term;Acetyl:2H(3)@K	0;9	27	QE	0.164873	VAAMSVAKR	0.917649	0.927463	0.756031	0.442986	6	0.26403	0.966552	1	RR;RR	TRUE	trypsin	3	9	2	0.181818	0.25
High	[R].lNkHEENLkTkkQQR.[K]	HCD	7.17	1.3e-05	4.5e-09	2.94	0.77	1	Sequest HT (2)	3	759.108	-0.71	66.1671	18352	18352	P42766	ArgAcetylD3	RLNKHEENLKTKKQQR	16	3	66.167	88	16		N-Term(ArgAcetylD3);K3(Acetyl:2H(3));K9(Acetyl:2H(3));K11(Acetyl:2H(3));K12(Acetyl:2H(3))	Acetyl:2H(3)@Any N-term;Acetyl:2H(3)@K;Acetyl:2H(3)@K;Acetyl:2H(3)@K;Acetyl:2H(3)@K	0;4;10;12;13	27	QE	0.165155	LNKHEENLKTKKQQR	0.989965	0.992379	0.921355	0.83287	17	0.992065	0.997446	1	RR	TRUE	trypsin	5	29	2	0.0645161	0.147059
Low	[R].nIEELQQQNQR.[L]	HCD	1.2	0.69	1	-0.925	0.06	1	Sequest HT (2)	2	800.913	-2.15	66.2579	18392	18392	P12270	ArgAcetylD3	RNIEELQQQNQR	12	2	66.258	89	12		N-Term(ArgAcetylD3)	Acetyl:2H(3)@Any N-term	0	27	QE	0.165982	NIEELQQQNQR	0.646123	0.657693	0.456935	-0.0455955	2	0.271511	0.758513	0	YR	TRUE	trypsin	0	3	11	0.785714	0
High	[R].lQQAVLSR.[Q]	HCD	2.14	8.3e-05	0.00027	0.843	0.27	1	Sequest HT (2)	2	558.339	-1.22	66.9719	18712	18712	Q15018	ArgAcetylD3	RLQQAVLSR	9	2	66.972	90	9		N-Term(ArgAcetylD3)	Acetyl:2H(3)@Any N-term	0	27	QE	0.172473	LQQAVLSR	0.897661	0.915598	0.736564	0.318732	5	0.372958	0.952639	1	RR	TRUE	trypsin	1	10	4	0.285714	0.0909091
Medium	[R].mAEEAAR.[K]	HCD	2.38	0.01	0.15	-0.003	0.43	1	Sequest HT (2)	1	978.493	6.37	67.5367	18957	18957	Q9BV94	ArgAcetylD3	RMAEEAAR	8	1	67.537	91	8		N-Term(ArgAcetylD3)	Acetyl:2H(3)@Any N-term	0	27	QE	0.177609	MAEEAAR	0.817114	0.845511	0.641408	0.0963327	4	-0.0783958	0.980505	0	LR	TRUE	trypsin	3	5	3	0.375	0.375
High	[R].gLGAPLTEDQQNR.[L]	HCD	2.55	0.00018	0.0007	0.663	0.54	1	Sequest HT (2)	2	800.419	1.33	67.6383	19003	19003	Q9H2D6	ArgAcetylD3	RGLGAPLTEDQQNR	14	2	67.638	92	14		N-Term(ArgAcetylD3)	Acetyl:2H(3)@Any N-term	0	27	QE	0.178527	GLGAPLTEDQQNR	0.966329	0.968641	0.840149	0.548493	3	0.936066	0.981376	1	RR	TRUE	trypsin	0	8	6	0.428571	0
High	[R].lLAEkER.[E]	HCD	2.28	0.00095	0.0088	0.312	0.05	1	Sequest HT (2)	2	552.836	-0.21	68.0444	19180	19180	P02545	ArgAcetylD3	RLLAEKER	8	2	68.044	93	8		N-Term(ArgAcetylD3);K5(Acetyl:2H(3))	Acetyl:2H(3)@Any N-term;Acetyl:2H(3)@K	0;6	27	QE	0.182218	LLAEKER	0.881631	0.907642	0.724239	0.388342	6	0.298243	0.950556	1	RR	TRUE	trypsin	3	8	2	0.2	0.272727
High	[R].lMAEDEEGYR.[K]	HCD	1.96	0.00014	0.00059	0.696	0.43	1	Sequest HT (2)	2	707.331	3.17	68.7543	19481	19481	P51532; P51531	ArgAcetylD3	RLMAEDEEGYR	11	2	68.754	94	11		N-Term(ArgAcetylD3)	Acetyl:2H(3)@Any N-term	0	27	QE	0.188673	LMAEDEEGYR	0.912166	0.916575	0.738115	0.716792	5	0.844535	0.948768	1	RR;RR	TRUE	trypsin	0	13	3	0.1875	0
High	[R].lRSENkDIENLR.[E]	HCD	2.14	0.0043	0.058	0.109	0.33	1	Sequest HT (2)	3	578.324	-0.43	69.6442	19860	19860	Q86UP2	ArgAcetylD3	RLRSENKDIENLR	13	3	69.644	95	13		N-Term(ArgAcetylD3);K6(Acetyl:2H(3))	Acetyl:2H(3)@Any N-term;Acetyl:2H(3)@K	0;7	27	QE	0.196764	LRSENKDIENLR	0.382774	0.480036	0.318753	-0.165382	7	-0.0356948	0.791212	0	ER	TRUE	trypsin	4	8	10	0.555556	0.333333
High	[R].qYEEkNkEFER.[E]	HCD	4.17	5.5e-05	0.00013	0.993	0.52	1	Sequest HT (2)	3	597.639	-0.21	69.8782	19956	19956	Q32MZ4	ArgAcetylD3	RQYEEKNKEFER	12	3	69.878	96	12		N-Term(ArgAcetylD3);K5(Acetyl:2H(3));K7(Acetyl:2H(3))	Acetyl:2H(3)@Any N-term;Acetyl:2H(3)@K;Acetyl:2H(3)@K	0;6;8	27	QE	0.198891	QYEEKNKEFER	0.985454	0.988872	0.904936	0.768358	7	0.940893	0.997271	1	RR	TRUE	trypsin	3	15	1	0.0625	0.166667
High	[R].lASTSDIEEkENR.[D]	HCD	3.47	5.8e-05	0.0002	0.908	0.54	1	Sequest HT (2)	3	579.968	1	70.3603	20155	20155	O14974	ArgAcetylD3	RLASTSDIEEKENR	14	3	70.36	97	14		N-Term(ArgAcetylD3);K10(Acetyl:2H(3))	Acetyl:2H(3)@Any N-term;Acetyl:2H(3)@K	0;11	27	QE	0.203273	LASTSDIEEKENR	0.991845	0.992808	0.923604	0.727866	6	0.996272	0.985225	1	RR	TRUE	trypsin	1	15	3	0.166667	0.0625
High	[R].iQEkkDEDIAR.[L]	HCD	4.01	1.3e-05	3.1e-06	1.71	0.58	1	Sequest HT (2)	2	818.454	-0.59	70.3756	20161	20161	Q8IVM0	ArgAcetylD3	RIQEKKDEDIAR	12	2	70.376	98	12		N-Term(ArgAcetylD3);K4(Acetyl:2H(3));K5(Acetyl:2H(3))	Acetyl:2H(3)@Any N-term;Acetyl:2H(3)@K;Acetyl:2H(3)@K	0;5;6	27	QE	0.203418	IQEKKDEDIAR	0.984503	0.987844	0.900635	0.746864	8	0.978302	0.989713	1	RR	TRUE	trypsin	2	16	2	0.111111	0.111111
High	[R].gFSTTSAITPAAGR.[S]	HCD	2.28	8.3e-05	0.00027	0.841	0.44	1	Sequest HT (2)	2	769.412	0.8	70.959	20406	20406	O95678	ArgAcetylD3	RGFSTTSAITPAAGR	15	2	70.959	99	15		N-Term(ArgAcetylD3)	Acetyl:2H(3)@Any N-term	0	27	QE	0.208718	GFSTTSAITPAAGR	0.870501	0.886008	0.693065	0.377717	4	0.495974	0.924414	1	RR	TRUE	trypsin	2	9	6	0.4	0.181818
High	[R].lEELRNQELQkR.[K]	HCD	3.99	8.3e-05	0.00032	0.809	0.45	1	Sequest HT (2)	3	601.343	-1.1	71.1269	20476	20476	Q8WXF1	ArgAcetylD3	RLEELRNQELQKR	13	3	71.127	100	13		N-Term(ArgAcetylD3);K11(Acetyl:2H(3))	Acetyl:2H(3)@Any N-term;Acetyl:2H(3)@K	0;12	27	QE	0.210245	LEELRNQELQKR	0.913312	0.933401	0.766348	0.734802	8	0.927032	0.907504	1	RR	TRUE	trypsin	0	18	4	0.181818	0
High	[R].kkLLADQAEAR.[S]	HCD	3.19	2.3e-05	5.3e-05	1.17	0.59	1	Sequest HT (2)	2	767.457	0.34	71.7919	20744	20744	P84098	ArgAcetylD3	RKKLLADQAEAR	12	2	71.792	101	12		N-Term(ArgAcetylD3);K1(Acetyl:2H(3));K2(Acetyl:2H(3))	Acetyl:2H(3)@Any N-term;Acetyl:2H(3)@K;Acetyl:2H(3)@K	0;2;3	27	QE	0.216291	KKLLADQAEAR	0.96989	0.974943	0.857187	0.561663	8	0.969705	0.973643	0	AR	TRUE	trypsin	3	12	3	0.2	0.2
High	[R].kkLLADQAEAR.[S]	HCD	4.25	8.3e-05	0.00027	0.845	0.57	1	Sequest HT (2)	3	511.974	1.18	71.8913	20784	20784	P84098	ArgAcetylD3	RKKLLADQAEAR	12	3	71.891	102	12		N-Term(ArgAcetylD3);K1(Acetyl:2H(3));K2(Acetyl:2H(3))	Acetyl:2H(3)@Any N-term;Acetyl:2H(3)@K;Acetyl:2H(3)@K	0;2;3	27	QE	0.217191	KKLLADQAEAR	0.985264	0.988986	0.905426	0.899154	8	0.984132	0.988034	0	AR	TRUE	trypsin	0	16	2	0.111111	0
High	[R].hEAAVPPLAIPSARPEkR.[D]	HCD	4.06	3.2e-05	8.4e-05	1.08	0.56	1	Sequest HT (2)	4	547.067	-1.25	71.9094	20791	20791	Q6PJT7	ArgAcetylD3	RHEAAVPPLAIPSARPEKR	19	4	71.909	103	19		N-Term(ArgAcetylD3);K17(Acetyl:2H(3))	Acetyl:2H(3)@Any N-term;Acetyl:2H(3)@K	0;18	27	QE	0.217355	HEAAVPPLAIPSARPEKR	0.969742	0.973334	0.852653	0.686781	6	0.98191	0.964104	1	RR	TRUE	trypsin	0	15	6	0.285714	0
High	[R].vLVDVER.[G]	HCD	2.28	0.00037	0.0025	0.463	0.02	1	Sequest HT (2)	2	515.808	0.16	72.3353	20964	20964	P08621	ArgAcetylD3	RVLVDVER	8	2	72.335	104	8		N-Term(ArgAcetylD3)	Acetyl:2H(3)@Any N-term	0	27	QE	0.221227	VLVDVER	0.917566	0.935136	0.769445	0.536946	4	0.916988	0.924911	1	RR	TRUE	trypsin	1	10	2	0.166667	0.0909091
High	[R].qPLSkLPR.[H]	HCD	1.51	0.00034	0.002	0.497	0.46	1	Sequest HT (2)	2	592.873	0.06	72.5018	21034	21034	O75164	ArgAcetylD3	RQPLSKLPR	9	2	72.502	105	9		N-Term(ArgAcetylD3);K5(Acetyl:2H(3))	Acetyl:2H(3)@Any N-term;Acetyl:2H(3)@K	0;6	27	QE	0.222745	QPLSKLPR	0.78858	0.832141	0.62577	0.61382	4	0.281764	0.963747	1	RR	TRUE	trypsin	1	9	2	0.181818	0.1
High	[R].lDLDAckAR.[L]	HCD	2.75	1.3e-05	3.5e-05	1.25	0.38	1	Sequest HT (2)	2	654.355	1.5	72.8479	21174	21174	Q9NR46	ArgAcetylD3	RLDLDACKAR	10	2	72.848	106	10		N-Term(ArgAcetylD3);C6(Carbamidomethyl);K7(Acetyl:2H(3))	Acetyl:2H(3)@Any N-term;Carbamidomethyl@C;Acetyl:2H(3)@K	0;7;8	27	QE	0.225891	LDLDACKAR	0.942933	0.95574	0.809886	0.773874	6	0.906362	0.959506	1	RR	TRUE	trypsin	0	13	2	0.133333	0
High	[R].vELSGPkAAEPVSR.[T]	HCD	4.32	1.3e-05	2.3e-05	1.33	0.57	1	Sequest HT (2)	2	843.476	0.16	73.5971	21470	21470	Q9UHD8	ArgAcetylD3	RVELSGPKAAEPVSR	15	2	73.597	107	15		N-Term(ArgAcetylD3);K7(Acetyl:2H(3))	Acetyl:2H(3)@Any N-term;Acetyl:2H(3)@K	0;8	27	QE	0.2327	VELSGPKAAEPVSR	0.956021	0.960367	0.820168	0.329973	7	0.916274	0.971407	1	RR	TRUE	trypsin	8	8	2	0.2	0.5
High	[R].vELSGPkAAEPVSR.[T]	HCD	4.7	1.3e-05	1.4e-05	1.43	0.61	1	Sequest HT (2)	3	562.653	-0.07	73.6126	21476	21476	Q9UHD8	ArgAcetylD3	RVELSGPKAAEPVSR	15	3	73.613	108	15		N-Term(ArgAcetylD3);K7(Acetyl:2H(3))	Acetyl:2H(3)@Any N-term;Acetyl:2H(3)@K	0;8	27	QE	0.232845	VELSGPKAAEPVSR	0.988649	0.99009	0.9103	0.701401	10	0.972883	0.990709	1	RR	TRUE	trypsin	4	17	2	0.105263	0.190476
High	[R].yQkSTELLIR.[K]	HCD	2.62	0.0022	0.026	0.194	0.5	1	Sequest HT (2)	3	499.628	-0.15	73.9548	21615	21615	P68431; Q16695; Q5TEC6; Q6NXT2; P84243; Q71DI3	ArgAcetylD3	RYQKSTELLIR	11	3	73.955	109	11		N-Term(ArgAcetylD3);K3(Acetyl:2H(3))	Acetyl:2H(3)@Any N-term;Acetyl:2H(3)@K	0;4	27	QE	0.235955	YQKSTELLIR	0.853996	0.87771	0.681859	0.229081	4	0.0435689	0.954881	1	RR;RR;RR;RR;RR;RR	TRUE	trypsin	2	9	7	0.4375	0.181818
High	[R].qLEEAEEEAQRANASR.[K]	HCD	4.49	1.3e-05	1.5e-05	1.41	0.51	1	Sequest HT (2)	3	678	-1.02	74.1267	21684	21684	P35579	ArgAcetylD3	RQLEEAEEEAQRANASR	17	3	74.127	110	17		N-Term(ArgAcetylD3)	Acetyl:2H(3)@Any N-term	0	27	QE	0.237518	QLEEAEEEAQRANASR	0.906819	0.929167	0.758948	0.716644	8	0.862062	0.923936	1	KR	TRUE	trypsin	2	16	3	0.157895	0.111111
High	[R].dFTPAELR.[F]	HCD	2.56	0.0035	0.048	0.131	0.32	1	Sequest HT (2)	2	575.308	0.54	74.5842	21868	21868	O00264	ArgAcetylD3	RDFTPAELR	9	2	74.584	111	9		N-Term(ArgAcetylD3)	Acetyl:2H(3)@Any N-term	0	27	QE	0.241673	DFTPAELR	0.973387	0.978415	0.867489	0.746518	5	0.941514	0.98397	1	RR	TRUE	trypsin	0	11	2	0.153846	0
High	[R].sIkLDGkGEPkGAkR.[A]	HCD	3.03	5e-05	9.5e-05	1.05	0.65	1	Sequest HT (2)	3	655.728	-0.1	74.6425	21891	21891	Q13576	ArgAcetylD3	RSIKLDGKGEPKGAKR	16	3	74.642	112	16		N-Term(ArgAcetylD3);K3(Acetyl:2H(3));K7(Acetyl:2H(3));K11(Acetyl:2H(3));K14(Acetyl:2H(3))	Acetyl:2H(3)@Any N-term;Acetyl:2H(3)@K;Acetyl:2H(3)@K;Acetyl:2H(3)@K;Acetyl:2H(3)@K	0;4;8;12;15	27	QE	0.2422	SIKLDGKGEPKGAKR	0.976804	0.979854	0.871998	0.73751	8	0.95373	0.978482	1	RR	TRUE	trypsin	1	16	4	0.2	0.0588235
High	[R].yQkSTELLIR.[K]	HCD	1.77	0.0081	0.12	0.028	0.39	1	Sequest HT (2)	3	499.629	0.56	74.7035	21916	21916	P68431; Q16695; Q5TEC6; Q6NXT2; P84243; Q71DI3	ArgAcetylD3	RYQKSTELLIR	11	3	74.704	113	11		N-Term(ArgAcetylD3);K3(Acetyl:2H(3))	Acetyl:2H(3)@Any N-term;Acetyl:2H(3)@K	0;4	27	QE	0.242764	YQKSTELLIR	0.830974	0.849612	0.646327	0.261914	1	0.0693315	0.922192	1	RR;RR;RR;RR;RR;RR	TRUE	trypsin	0	7	9	0.5625	0
High	[R].eVkkEEGEAFAR.[E]	HCD	4.5	1.3e-05	2.1e-07	2.21	0.67	1	Sequest HT (2)	2	842.456	2.09	74.9737	22024	22024	P61019	ArgAcetylD3	REVKKEEGEAFAR	13	2	74.974	114	13		N-Term(ArgAcetylD3);K3(Acetyl:2H(3));K4(Acetyl:2H(3))	Acetyl:2H(3)@Any N-term;Acetyl:2H(3)@K;Acetyl:2H(3)@K	0;4;5	27	QE	0.245218	EVKKEEGEAFAR	0.921438	0.938253	0.775113	0.685193	8	0.837278	0.9497	1	RR	TRUE	trypsin	3	13	2	0.133333	0.1875
High	[R].eVkkEEGEAFAR.[E]	HCD	4.31	3.2e-05	8.2e-05	1.08	0.66	1	Sequest HT (2)	3	561.973	1.13	74.9846	22028	22028	P61019	ArgAcetylD3	REVKKEEGEAFAR	13	3	74.985	115	13		N-Term(ArgAcetylD3);K3(Acetyl:2H(3));K4(Acetyl:2H(3))	Acetyl:2H(3)@Any N-term;Acetyl:2H(3)@K;Acetyl:2H(3)@K	0;4;5	27	QE	0.245318	EVKKEEGEAFAR	0.992327	0.993985	0.93014	0.83109	9	0.983455	0.996046	1	RR	TRUE	trypsin	2	16	1	0.0588235	0.111111
High	[R].fTEELPDER.[E]	HCD	2.53	0.00037	0.0025	0.463	0.39	1	Sequest HT (2)	2	668.835	4.15	75.1944	22114	22114	Q7Z7F0	ArgAcetylD3	RFTEELPDER	10	2	75.194	116	10		N-Term(ArgAcetylD3)	Acetyl:2H(3)@Any N-term	0	27	QE	0.247218	FTEELPDER	0.994839	0.995148	0.937262	0.696268	6	0.985295	0.998091	1	RR	TRUE	trypsin	1	12	2	0.142857	0.0769231
High	[R].yQkSTELLIR.[K]	HCD	4.03	5.8e-05	0.00015	0.956	0.7	1	Sequest HT (2)	3	499.629	0.59	75.3992	22201	22201	P68431; Q16695; Q5TEC6; Q6NXT2; P84243; Q71DI3	ArgAcetylD3	RYQKSTELLIR	11	3	75.399	117	11		N-Term(ArgAcetylD3);K3(Acetyl:2H(3))	Acetyl:2H(3)@Any N-term;Acetyl:2H(3)@K	0;4	27	QE	0.249082	YQKSTELLIR	0.974661	0.981209	0.87639	0.920263	8	0.967498	0.975665	1	RR;RR;RR;RR;RR;RR	TRUE	trypsin	0	15	1	0.0625	0
High	[R].yQkSTELLIR.[K]	HCD	2.75	0.0003	0.0018	0.514	0.47	1	Sequest HT (2)	2	748.939	-0.27	75.5739	22277	22277	P68431; Q16695; Q5TEC6; Q6NXT2; P84243; Q71DI3	ArgAcetylD3	RYQKSTELLIR	11	2	75.574	118	11		N-Term(ArgAcetylD3);K3(Acetyl:2H(3))	Acetyl:2H(3)@Any N-term;Acetyl:2H(3)@K	0;4	27	QE	0.250673	YQKSTELLIR	0.926963	0.934312	0.767971	0.400375	4	0.898768	0.942614	1	RR;RR;RR;RR;RR;RR	TRUE	trypsin	1	6	5	0.454545	0.142857
High	[R].kVEEAFNcR.[C]	HCD	3.12	2.3e-05	6.5e-05	1.13	0.63	1	Sequest HT (2)	2	699.856	-0.57	75.6095	22293	22293	P52888	ArgAcetylD3	RKVEEAFNCR	10	2	75.61	119	10		N-Term(ArgAcetylD3);K1(Acetyl:2H(3));C8(Carbamidomethyl)	Acetyl:2H(3)@Any N-term;Acetyl:2H(3)@K;Carbamidomethyl@C	0;2;9	27	QE	0.251	KVEEAFNCR	0.943614	0.955368	0.809081	0.621107	6	0.731293	0.970324	1	RR	TRUE	trypsin	2	11	2	0.153846	0.153846
High	[R].lLQQEEkVkR.[Q]	HCD	3.31	5.8e-05	0.00015	0.956	0.55	1	Sequest HT (2)	3	521.318	1.99	75.8764	22403	22403	Q9BSC4	ArgAcetylD3	RLLQQEEKVKR	11	3	75.876	120	11		N-Term(ArgAcetylD3);K7(Acetyl:2H(3));K9(Acetyl:2H(3))	Acetyl:2H(3)@Any N-term;Acetyl:2H(3)@K;Acetyl:2H(3)@K	0;8;10	27	QE	0.253418	LLQQEEKVKR	0.972555	0.979629	0.871282	0.871201	7	0.973425	0.977279	1	RR	TRUE	trypsin	0	16	2	0.111111	0
High	[R].yQkSTELLIR.[K]	HCD	3.72	0.00011	0.00041	0.765	0.67	1	Sequest HT (2)	3	499.628	0.2	75.9134	22419	22419	P68431; Q16695; Q5TEC6; Q6NXT2; P84243; Q71DI3	ArgAcetylD3	RYQKSTELLIR	11	3	75.913	121	11		N-Term(ArgAcetylD3);K3(Acetyl:2H(3))	Acetyl:2H(3)@Any N-term;Acetyl:2H(3)@K	0;4	27	QE	0.253755	YQKSTELLIR	0.991812	0.993897	0.929628	0.866041	8	0.96143	0.998672	1	RR;RR;RR;RR;RR;RR	TRUE	trypsin	1	15	1	0.0625	0.0625
High	[R].lLQQEEkVkR.[Q]	HCD	1.59	0.0035	0.048	0.129	0.53	1	Sequest HT (2)	2	781.473	0.94	75.9206	22422	22422	Q9BSC4	ArgAcetylD3	RLLQQEEKVKR	11	2	75.921	122	11		N-Term(ArgAcetylD3);K7(Acetyl:2H(3));K9(Acetyl:2H(3))	Acetyl:2H(3)@Any N-term;Acetyl:2H(3)@K;Acetyl:2H(3)@K	0;8;10	27	QE	0.253827	LLQQEEKVKR	0.954143	0.952883	0.803798	0.486773	3	0.633546	0.980675	1	RR	TRUE	trypsin	0	9	6	0.4	0
High	[R].iVEQDTMPPkGVR.[H]	HCD	1.88	0.0011	0.011	0.29	0.42	1	Sequest HT (2)	2	858.472	-1.1	76.3366	22594	22594	O15523; O00571	ArgAcetylD3	RIVEQDTMPPKGVR	14	2	76.337	123	14		N-Term(ArgAcetylD3);K10(Acetyl:2H(3))	Acetyl:2H(3)@Any N-term;Acetyl:2H(3)@K	0;11	27	QE	0.257609	IVEQDTMPPKGVR	0.971602	0.973233	0.852371	0.55797	3	0.961746	0.97745	1	RR;RR	TRUE	trypsin	0	7	6	0.461538	0
High	[R].qQEGFkGTFPDAR.[E]	HCD	2.21	0.00013	0.00052	0.718	0.19	1	Sequest HT (2)	3	576.298	0.57	76.6306	22714	22714	Q15233	ArgAcetylD3	RQQEGFKGTFPDAR	14	3	76.631	124	14		N-Term(ArgAcetylD3);K6(Acetyl:2H(3))	Acetyl:2H(3)@Any N-term;Acetyl:2H(3)@K	0;7	27	QE	0.260282	QQEGFKGTFPDAR	0.95546	0.961427	0.822604	0.572099	4	0.920965	0.956835	1	RR	TRUE	trypsin	1	12	6	0.333333	0.0769231
High	[R].qQEGFkGTFPDAR.[E]	HCD	3.43	1.3e-05	2.2e-06	1.77	0.53	1	Sequest HT (2)	2	863.939	-4.01	76.6332	22715	22715	Q15233	ArgAcetylD3	RQQEGFKGTFPDAR	14	2	76.633	125	14		N-Term(ArgAcetylD3);K6(Acetyl:2H(3))	Acetyl:2H(3)@Any N-term;Acetyl:2H(3)@K	0;7	27	QE	0.2603	QQEGFKGTFPDAR	0.985034	0.985634	0.891961	0.199522	5	0.966558	0.994099	1	RR	TRUE	trypsin	3	9	7	0.4375	0.25
High	[R].lTEEFQNVR.[I]	HCD	2.47	6.5e-05	0.00023	0.876	0.21	1	Sequest HT (2)	2	668.856	-0.24	76.9726	22855	22855	Q9UI43	ArgAcetylD3	RLTEEFQNVR	10	2	76.973	126	10		N-Term(ArgAcetylD3)	Acetyl:2H(3)@Any N-term	0	27	QE	0.263391	LTEEFQNVR	0.921831	0.92666	0.754667	0.484556	7	0.568647	0.962733	1	RR	TRUE	trypsin	2	12	3	0.2	0.142857
High	[R].iVEQDTMPPkGVR.[H]	HCD	3.79	1.3e-05	3.6e-05	1.24	0.57	1	Sequest HT (2)	3	572.651	-0.18	77.0606	22891	22891	O15523; O00571	ArgAcetylD3	RIVEQDTMPPKGVR	14	3	77.061	127	14		N-Term(ArgAcetylD3);K10(Acetyl:2H(3))	Acetyl:2H(3)@Any N-term;Acetyl:2H(3)@K	0;11	27	QE	0.264191	IVEQDTMPPKGVR	0.988632	0.990185	0.91073	0.725177	12	0.950882	0.995138	1	RR;RR	TRUE	trypsin	4	17	1	0.0555556	0.190476
High	[R].lAAEATEWQR.[S]	HCD	3.22	1.3e-05	1.4e-05	1.43	0.48	1	Sequest HT (2)	2	688.36	-1.7	77.6509	23134	23134	Q96SB4	ArgAcetylD3	RLAAEATEWQR	11	2	77.651	128	11		N-Term(ArgAcetylD3)	Acetyl:2H(3)@Any N-term	0	27	QE	0.269555	LAAEATEWQR	0.91535	0.931279	0.762612	0.75075	5	0.73946	0.964428	1	RR	TRUE	trypsin	0	13	2	0.133333	0
High	[R].lEAVLASR.[S]	HCD	2.62	0.00013	0.00051	0.724	0.31	1	Sequest HT (2)	2	530.32	-1.66	79.1207	23754	23754	Q9BVI4	ArgAcetylD3	RLEAVLASR	9	2	79.121	129	9		N-Term(ArgAcetylD3)	Acetyl:2H(3)@Any N-term	0	27	QE	0.282918	LEAVLASR	0.92882	0.934729	0.768716	0.492302	3	0.463769	0.967437	1	RR	TRUE	trypsin	0	10	4	0.285714	0
High	[R].iVDGkVVSETNDTkVLRH.[-]	HCD	6.59	1.3e-05	2.1e-07	2.21	0.8	1	Sequest HT (2)	3	767.768	0.54	79.7235	24008	24008	P05783	ArgAcetylD3	RIVDGKVVSETNDTKVLRH	19	3	79.724	130	19		N-Term(ArgAcetylD3);K5(Acetyl:2H(3));K14(Acetyl:2H(3))	Acetyl:2H(3)@Any N-term;Acetyl:2H(3)@K;Acetyl:2H(3)@K	0;6;15	27	QE	0.2884	IVDGKVVSETNDTKVLRH	0.961099	0.969825	0.843209	0.748135	14	0.991823	0.873551	1	RR	TRUE	trypsin	1	30	7	0.189189	0.0322581
High	[R].lEAAYLDLQR.[I]	HCD	2.68	0.0037	0.051	0.123	0.38	1	Sequest HT (2)	3	464.927	-0.38	81.0248	24572	24572	O75347	ArgAcetylD3	RLEAAYLDLQR	11	3	81.025	131	11		N-Term(ArgAcetylD3)	Acetyl:2H(3)@Any N-term	0	27	QE	0.300227	LEAAYLDLQR	0.773367	0.807229	0.598067	0.334428	2	0.454921	0.968148	1	RR	TRUE	trypsin	1	7	6	0.461538	0.125
High	[R].iVDGkVVSETNDTkVLRH.[-]	HCD	5.07	1.3e-05	2.9e-05	1.28	0.59	1	Sequest HT (2)	4	576.076	-1.38	81.0746	24594	24594	P05783	ArgAcetylD3	RIVDGKVVSETNDTKVLRH	19	4	81.075	132	19		N-Term(ArgAcetylD3);K5(Acetyl:2H(3));K14(Acetyl:2H(3))	Acetyl:2H(3)@Any N-term;Acetyl:2H(3)@K;Acetyl:2H(3)@K	0;6;15	27	QE	0.300682	IVDGKVVSETNDTKVLRH	0.979936	0.98394	0.885752	0.762348	7	0.989483	0.960403	1	RR	TRUE	trypsin	2	23	4	0.148148	0.08
High	[R].iVDGkVVSETNDTkVLRH.[-]	HCD	7.42	1.3e-05	6.4e-09	2.87	0.77	1	Sequest HT (2)	3	767.767	0.11	81.1015	24605	24605	P05783	ArgAcetylD3	RIVDGKVVSETNDTKVLRH	19	3	81.102	133	19		N-Term(ArgAcetylD3);K5(Acetyl:2H(3));K14(Acetyl:2H(3))	Acetyl:2H(3)@Any N-term;Acetyl:2H(3)@K;Acetyl:2H(3)@K	0;6;15	27	QE	0.300927	IVDGKVVSETNDTKVLRH	0.991397	0.993353	0.926557	0.841807	18	0.995353	0.980847	1	RR	TRUE	trypsin	4	35	2	0.0540541	0.102564
High	[R].aMADPEVQQImSDPAMR.[L]	HCD	4.85	1.3e-05	4.8e-05	1.19	0.14	1	Sequest HT (2)	3	702.998	-0.29	81.6495	24838	24838	P31948	ArgAcetylD3	RAMADPEVQQIMSDPAMR	18	3	81.65	134	18		N-Term(ArgAcetylD3);M11(Oxidation)	Acetyl:2H(3)@Any N-term;Oxidation@M	0;12	27	QE	0.305909	AMADPEVQQIMSDPAMR	0.977694	0.979892	0.872118	0.864546	11	0.967768	0.997934	1	RR	TRUE	trypsin	1	21	2	0.0869565	0.0454545
High	[R].yQkSTELLIR.[K]	HCD	2.42	0.00011	0.00039	0.771	0.35	1	Sequest HT (2)	2	748.938	-1.31	82.8061	25336	25336	P68431; Q16695; Q5TEC6; Q6NXT2; P84243; Q71DI3	ArgAcetylD3	RYQKSTELLIR	11	2	82.806	135	11		N-Term(ArgAcetylD3);K3(Acetyl:2H(3))	Acetyl:2H(3)@Any N-term;Acetyl:2H(3)@K	0;4	27	QE	0.316418	YQKSTELLIR	0.967038	0.96973	0.842962	0.636398	4	0.902487	0.977509	1	RR;RR;RR;RR;RR;RR	TRUE	trypsin	2	9	2	0.181818	0.181818
Medium	[R].vATWFNQPAR.[K]	HCD	1.31	0.029	0.43	-0.142	0.37	1	Sequest HT (2)	2	695.874	-1.21	83.6889	25709	25709	P26373	ArgAcetylD3	RVATWFNQPAR	11	2	83.689	136	11		N-Term(ArgAcetylD3)	Acetyl:2H(3)@Any N-term	0	27	QE	0.324445	VATWFNQPAR	0.86561	0.856059	0.654189	-0.0582552	0	NA	0.924801	1	RR	TRUE	trypsin	0	3	11	0.785714	0
High	[R].iVDGkVVSETNDTkVLRH.[-]	HCD	6.12	1.3e-05	1e-07	2.35	0.68	1	Sequest HT (2)	3	767.767	-0.13	84.4457	26036	26036	P05783	ArgAcetylD3	RIVDGKVVSETNDTKVLRH	19	3	84.446	137	19		N-Term(ArgAcetylD3);K5(Acetyl:2H(3));K14(Acetyl:2H(3))	Acetyl:2H(3)@Any N-term;Acetyl:2H(3)@K;Acetyl:2H(3)@K	0;6;15	27	QE	0.331327	IVDGKVVSETNDTKVLRH	0.983766	0.987248	0.898222	0.741446	13	0.988052	0.970832	1	RR	TRUE	trypsin	0	28	9	0.243243	0
High	[R].sQPkDLAAkRPEEkEPEkVNPQISDEkDEDEkEEkR.[K]	HCD	5.74	1.3e-05	7.9e-06	1.53	0.74	1	Sequest HT (2)	4	1192.12	-1.7	84.5075	26063	26063	P26358	ArgAcetylD3	RSQPKDLAAKRPEEKEPEKVNPQISDEKDEDEKEEKR	37	4	84.507	138	37		N-Term(ArgAcetylD3);K4(Acetyl:2H(3));K9(Acetyl:2H(3));K14(Acetyl:2H(3));K18(Acetyl:2H(3));K27(Acetyl:2H(3));K32(Acetyl:2H(3));K35(Acetyl:2H(3))	Acetyl:2H(3)@Any N-term;Acetyl:2H(3)@K;Acetyl:2H(3)@K;Acetyl:2H(3)@K;Acetyl:2H(3)@K;Acetyl:2H(3)@K;Acetyl:2H(3)@K;Acetyl:2H(3)@K	0;5;10;15;19;28;33;36	27	QE	0.331882	SQPKDLAAKRPEEKEPEKVNPQISDEKDEDEKEEKR	0.940109	0.946993	0.79179	0.855749	13	0.918094	0.97839	NA	NA	FALSE	trypsin	1	28	4	0.125	0.0344828
High	[R].lDLLEDR.[S]	HCD	2.58	0.0003	0.0017	0.518	0.25	1	Sequest HT (2)	2	537.802	-0.92	84.7561	26166	26166	Q14697	ArgAcetylD3	RLDLLEDR	8	2	84.756	139	8		N-Term(ArgAcetylD3)	Acetyl:2H(3)@Any N-term	0	27	QE	0.334145	LDLLEDR	0.956494	0.966697	0.835241	0.77422	5	0.894304	0.970129	0	FR	TRUE	trypsin	0	11	2	0.153846	0
High	[R].lDHLAEkFR.[Q]	HCD	2.73	5.8e-05	0.00017	0.934	0.56	1	Sequest HT (2)	3	458.93	-0.71	84.8727	26214	26214	O43707; P12814	ArgAcetylD3	RLDHLAEKFR	10	3	84.873	140	10		N-Term(ArgAcetylD3);K7(Acetyl:2H(3))	Acetyl:2H(3)@Any N-term;Acetyl:2H(3)@K	0;8	27	QE	0.335209	LDHLAEKFR	0.988425	0.990599	0.912636	0.785586	9	0.990591	0.987569	0	ER;ER	TRUE	trypsin	2	14	1	0.0666667	0.125
High	[R].qLLATLR.[A]	HCD	2.11	0.00035	0.0023	0.478	0.27	1	Sequest HT (2)	2	508.325	-1.7	85.0478	26284	26284	O43159	ArgAcetylD3	RQLLATLR	8	2	85.048	141	8		N-Term(ArgAcetylD3)	Acetyl:2H(3)@Any N-term	0	27	QE	0.3368	QLLATLR	0.950607	0.951327	0.800557	0.439245	3	0.512836	0.981445	1	RR	TRUE	trypsin	0	8	5	0.384615	0
High	[R].lDLLEDR.[S]	HCD	2.64	0.00034	0.0021	0.486	0.28	1	Sequest HT (2)	2	537.802	-1.14	85.2775	26387	26387	Q14697	ArgAcetylD3	RLDLLEDR	8	2	85.278	142	8		N-Term(ArgAcetylD3)	Acetyl:2H(3)@Any N-term	0	27	QE	0.338891	LDLLEDR	0.980674	0.982675	0.881325	0.705802	5	0.911176	0.991582	0	FR	TRUE	trypsin	1	11	2	0.153846	0.0833333
Low	[R].gDTFSALTSVAR.[A]	HCD	1.18	0.15	0.89	-0.361	0.14	1	Sequest HT (2)	2	713.38	-0.48	85.452	26461	26461	Q7Z4N8	ArgAcetylD3	RGDTFSALTSVAR	13	2	85.452	143	13		N-Term(ArgAcetylD3)	Acetyl:2H(3)@Any N-term	0	27	QE	0.340473	GDTFSALTSVAR	0.919274	0.920947	0.745167	0.186713	4	0.755662	0.964001	0	AR	TRUE	trypsin	1	6	9	0.6	0.142857
High	[R].nFAELkIkR.[L]	HCD	2.25	8.3e-05	0.00029	0.828	0.3	1	Sequest HT (2)	2	705.43	-3.65	86.238	26793	26793	P18124	ArgAcetylD3	RNFAELKIKR	10	2	86.238	144	10		N-Term(ArgAcetylD3);K6(Acetyl:2H(3));K8(Acetyl:2H(3))	Acetyl:2H(3)@Any N-term;Acetyl:2H(3)@K;Acetyl:2H(3)@K	0;7;9	27	QE	0.347618	NFAELKIKR	0.943005	0.950384	0.798618	0.645946	6	0.622542	0.969368	1	RR	TRUE	trypsin	1	13	2	0.133333	0.0714286
High	[R].nFAELkIkR.[L]	HCD	3.71	0.00012	0.00042	0.758	0.57	1	Sequest HT (2)	3	470.623	-1.3	86.3199	26825	26825	P18124	ArgAcetylD3	RNFAELKIKR	10	3	86.32	145	10		N-Term(ArgAcetylD3);K6(Acetyl:2H(3));K8(Acetyl:2H(3))	Acetyl:2H(3)@Any N-term;Acetyl:2H(3)@K;Acetyl:2H(3)@K	0;7;9	27	QE	0.348364	NFAELKIKR	0.994347	0.995733	0.941172	0.883913	7	0.989434	0.996279	1	RR	TRUE	trypsin	1	15	1	0.0625	0.0625
High	[R].nFAELkIkR.[L]	HCD	2.74	0.00011	0.00041	0.764	0.45	1	Sequest HT (2)	2	705.432	-0.79	86.3817	26850	26850	P18124	ArgAcetylD3	RNFAELKIKR	10	2	86.382	146	10		N-Term(ArgAcetylD3);K6(Acetyl:2H(3));K8(Acetyl:2H(3))	Acetyl:2H(3)@Any N-term;Acetyl:2H(3)@K;Acetyl:2H(3)@K	0;7;9	27	QE	0.348927	NFAELKIKR	0.917873	0.922906	0.748385	0.204762	2	0.221627	0.968275	1	RR	TRUE	trypsin	1	8	7	0.466667	0.111111
High	[R].lESkIREHLEkkGPQVR.[D]	HCD	6.01	1.3e-05	3.7e-07	2.11	0.57	1	Sequest HT (2)	4	596.604	-0.28	86.6038	26940	26940	P05783	ArgAcetylD3	RLESKIREHLEKKGPQVR	18	4	86.604	147	18		N-Term(ArgAcetylD3);K4(Acetyl:2H(3));K11(Acetyl:2H(3));K12(Acetyl:2H(3))	Acetyl:2H(3)@Any N-term;Acetyl:2H(3)@K;Acetyl:2H(3)@K;Acetyl:2H(3)@K	0;5;12;13	27	QE	0.350945	LESKIREHLEKKGPQVR	0.993952	0.994713	0.934508	0.828396	11	0.994823	0.993931	1	RR	TRUE	trypsin	3	20	1	0.047619	0.130435
High	[R].lESkIREHLEkkGPQVR.[D]	HCD	5.41	1.3e-05	1.1e-05	1.46	0.58	1	Sequest HT (2)	4	596.605	0.34	87.1364	27155	27155	P05783	ArgAcetylD3	RLESKIREHLEKKGPQVR	18	4	87.136	148	18		N-Term(ArgAcetylD3);K4(Acetyl:2H(3));K11(Acetyl:2H(3));K12(Acetyl:2H(3))	Acetyl:2H(3)@Any N-term;Acetyl:2H(3)@K;Acetyl:2H(3)@K;Acetyl:2H(3)@K	0;5;12;13	27	QE	0.355782	LESKIREHLEKKGPQVR	0.991245	0.9922	0.920433	0.8066	11	0.984002	0.997263	1	RR	TRUE	trypsin	3	20	1	0.047619	0.130435
High	[R].lLEGEDAHLTQYkkEPVTTR.[Q]	HCD	4.5	1.3e-05	3.1e-06	1.71	0.71	1	Sequest HT (2)	3	873.809	1.13	87.3128	27227	27227	Q04695	ArgAcetylD3	RLLEGEDAHLTQYKKEPVTTR	21	3	87.313	149	21		N-Term(ArgAcetylD3);K13(Acetyl:2H(3));K14(Acetyl:2H(3))	Acetyl:2H(3)@Any N-term;Acetyl:2H(3)@K;Acetyl:2H(3)@K	0;14;15	27	QE	0.357391	LLEGEDAHLTQYKKEPVTTR	0.909482	0.925619	0.75291	0.467991	9	0.856046	0.982318	1	RR	TRUE	trypsin	0	19	15	0.441176	0
Medium	[R].amADPEVQQIMSDPAMR.[L]	HCD	1.64	0.021	0.32	-0.097	0.35	1	Sequest HT (2)	2	1053.99	-1.33	87.3673	27248	27248	P31948	ArgAcetylD3	RAMADPEVQQIMSDPAMR	18	2	87.367	150	18		N-Term(ArgAcetylD3);M2(Oxidation)	Acetyl:2H(3)@Any N-term;Oxidation@M	0;3	27	QE	0.357882	AMADPEVQQIMSDPAMR	0.925428	0.927643	0.756338	0.63721	2	0.955245	0.921448	1	RR	TRUE	trypsin	1	5	4	0.444444	0.166667
High	[R].amADPEVQQIMSDPAMR.[L]	HCD	4.46	1.3e-05	3.2e-05	1.27	0.61	1	Sequest HT (2)	3	702.998	-0.76	87.3765	27252	27252	P31948	ArgAcetylD3	RAMADPEVQQIMSDPAMR	18	3	87.376	151	18		N-Term(ArgAcetylD3);M2(Oxidation)	Acetyl:2H(3)@Any N-term;Oxidation@M	0;3	27	QE	0.357964	AMADPEVQQIMSDPAMR	0.986122	0.987648	0.899835	0.827633	13	0.988874	0.995793	1	RR	TRUE	trypsin	1	20	3	0.130435	0.047619
High	[R].iVDGkVVSETNDTkVLR.[H]	HCD	5.39	1.3e-05	2.8e-06	1.73	0.65	1	Sequest HT (2)	3	722.081	0.54	87.8194	27433	27433	P05783	ArgAcetylD3	RIVDGKVVSETNDTKVLR	18	3	87.819	152	18		N-Term(ArgAcetylD3);K5(Acetyl:2H(3));K14(Acetyl:2H(3))	Acetyl:2H(3)@Any N-term;Acetyl:2H(3)@K;Acetyl:2H(3)@K	0;6;15	27	QE	0.361991	IVDGKVVSETNDTKVLR	0.80492	0.84121	0.636313	0.742986	10	0.670467	0.997366	1	RR	TRUE	trypsin	1	21	4	0.16	0.0454545
High	[R].iVDGkVVSETNDTkVLR.[H]	HCD	3.31	1.3e-05	4.1e-07	2.09	0.71	1	Sequest HT (2)	2	1082.62	-0.3	87.8972	27464	27464	P05783	ArgAcetylD3	RIVDGKVVSETNDTKVLR	18	2	87.897	153	18		N-Term(ArgAcetylD3);K5(Acetyl:2H(3));K14(Acetyl:2H(3))	Acetyl:2H(3)@Any N-term;Acetyl:2H(3)@K;Acetyl:2H(3)@K	0;6;15	27	QE	0.3627	IVDGKVVSETNDTKVLR	0.993631	0.994103	0.930831	0.759457	7	0.995971	0.991396	1	RR	TRUE	trypsin	3	12	1	0.0769231	0.2
High	[R].cLYASVLTAQPR.[L]	HCD	4.19	7.2e-05	0.00024	0.866	0.55	1	Sequest HT (2)	3	527.288	2.46	88.0137	27512	27512	P13639	ArgAcetylD3	RCLYASVLTAQPR	13	3	88.014	154	13		N-Term(ArgAcetylD3);C1(Carbamidomethyl)	Acetyl:2H(3)@Any N-term;Carbamidomethyl@C	0;2	27	QE	0.363764	CLYASVLTAQPR	0.991768	0.993275	0.926125	0.799989	9	0.971006	0.997234	1	RR	TRUE	trypsin	1	16	3	0.157895	0.0588235
High	[R].aMADPEVQQIMSDPAmR.[L]	HCD	4.46	1.3e-05	1.1e-05	1.48	0.16	1	Sequest HT (2)	3	702.998	-1.18	88.3168	27637	27637	P31948	ArgAcetylD3	RAMADPEVQQIMSDPAMR	18	3	88.317	155	18		N-Term(ArgAcetylD3);M16(Oxidation)	Acetyl:2H(3)@Any N-term;Oxidation@M	0;17	27	QE	0.366518	AMADPEVQQIMSDPAMR	0.993435	0.994199	0.931394	0.829427	14	0.99587	0.985148	1	RR	TRUE	trypsin	3	21	1	0.0454545	0.125
Low	[R].aMADPEVQQIMSDPAmR.[L]	HCD	1.76	0.1	0.81	-0.304	0.3	1	Sequest HT (2)	2	1053.99	-0.74	88.4246	27682	27682	P31948	ArgAcetylD3	RAMADPEVQQIMSDPAMR	18	2	88.425	156	18		N-Term(ArgAcetylD3);M16(Oxidation)	Acetyl:2H(3)@Any N-term;Oxidation@M	0;17	27	QE	0.3675	AMADPEVQQIMSDPAMR	0.956782	0.958586	0.816144	0.527885	5	0.963473	0.987677	1	RR	TRUE	trypsin	2	6	5	0.454545	0.25
High	[R].vPTANVSVVDLTcR.[L]	HCD	5.41	2.3e-05	5.5e-05	1.16	0.61	1	Sequest HT (2)	3	577.981	1.42	88.5862	27747	27747	P04406	ArgAcetylD3	RVPTANVSVVDLTCR	15	3	88.586	157	15		N-Term(ArgAcetylD3);C13(Carbamidomethyl)	Acetyl:2H(3)@Any N-term;Carbamidomethyl@C	0;14	27	QE	0.368964	VPTANVSVVDLTCR	0.987974	0.990154	0.910589	0.809125	12	0.988276	0.991654	0	FR	TRUE	trypsin	3	19	1	0.05	0.136364
High	[R].vPTANVSVVDLTcR.[L]	HCD	4.4	1.3e-05	3.7e-08	2.54	0.76	1	Sequest HT (2)	2	866.466	-0.51	88.6042	27754	27754	P04406	ArgAcetylD3	RVPTANVSVVDLTCR	15	2	88.604	158	15		N-Term(ArgAcetylD3);C13(Carbamidomethyl)	Acetyl:2H(3)@Any N-term;Carbamidomethyl@C	0;14	27	QE	0.369127	VPTANVSVVDLTCR	0.940652	0.945997	0.789827	0.683937	4	0.935098	0.946476	0	FR	TRUE	trypsin	2	9	2	0.181818	0.181818
Medium	[R].sPSkPLPEVTDEYkNDVkNR.[S]	HCD	1.93	0.012	0.17	-0.02	0.32	1	Sequest HT (2)	3	884.806	0.94	88.6351	27768	27768	P05455	ArgAcetylD3	RSPSKPLPEVTDEYKNDVKNR	21	3	88.635	159	21		N-Term(ArgAcetylD3);K4(Acetyl:2H(3));K14(Acetyl:2H(3));K18(Acetyl:2H(3))	Acetyl:2H(3)@Any N-term;Acetyl:2H(3)@K;Acetyl:2H(3)@K;Acetyl:2H(3)@K	0;5;15;19	27	QE	0.369409	SPSKPLPEVTDEYKNDVKNR	0.522212	0.572449	0.388013	-0.122879	3	-0.038798	0.842339	1	RR	TRUE	trypsin	1	8	22	0.733333	0.111111
High	[R].gPSWDPFR.[D]	HCD	1.54	0.0028	0.037	0.159	0.34	1	Sequest HT (2)	2	581.795	-0.28	88.9466	27895	27895	P04792	ArgAcetylD3	RGPSWDPFR	9	2	88.947	160	9		N-Term(ArgAcetylD3)	Acetyl:2H(3)@Any N-term	0	27	QE	0.372245	GPSWDPFR	0.983267	0.983867	0.885493	0.319465	3	0.982862	0.983396	0	LR	TRUE	trypsin	0	9	7	0.4375	0
High	[R].gLMSQLEEkER.[L]	HCD	3.41	0.00011	0.00038	0.78	0.4	1	Sequest HT (2)	2	783.418	4.51	89.5404	28135	28135	Q9BW19	ArgAcetylD3	RGLMSQLEEKER	12	2	89.54	161	12		N-Term(ArgAcetylD3);K9(Acetyl:2H(3))	Acetyl:2H(3)@Any N-term;Acetyl:2H(3)@K	0;10	27	QE	0.377636	GLMSQLEEKER	0.922988	0.927674	0.75639	0.486328	3	0.769708	0.942873	1	RR	TRUE	trypsin	0	9	6	0.4	0
High	[R].gLMSQLEEkER.[L]	HCD	3.42	0.00018	0.00077	0.647	0.48	1	Sequest HT (2)	3	522.612	-0.64	89.6539	28181	28181	Q9BW19	ArgAcetylD3	RGLMSQLEEKER	12	3	89.654	162	12		N-Term(ArgAcetylD3);K9(Acetyl:2H(3))	Acetyl:2H(3)@Any N-term;Acetyl:2H(3)@K	0;10	27	QE	0.378673	GLMSQLEEKER	0.862825	0.890336	0.699061	0.296406	6	0.643104	0.988388	1	RR	TRUE	trypsin	4	9	5	0.357143	0.307692
High	[R].lSDkGLkAELmER.[L]	HCD	4.39	5e-05	9.7e-05	1.05	0.58	1	Sequest HT (2)	3	599.668	-0.21	90.3649	28471	28471	Q00839	ArgAcetylD3	RLSDKGLKAELMER	14	3	90.365	163	14		N-Term(ArgAcetylD3);K4(Acetyl:2H(3));K7(Acetyl:2H(3));M11(Oxidation)	Acetyl:2H(3)@Any N-term;Acetyl:2H(3)@K;Acetyl:2H(3)@K;Oxidation@M	0;5;8;12	27	QE	0.385136	LSDKGLKAELMER	0.960074	0.966528	0.834821	0.732818	7	0.916218	0.999055	1	RR	TRUE	trypsin	1	14	3	0.176471	0.0666667
High	[R].lEAAYLDLQR.[I]	HCD	3.43	1.3e-05	4.6e-05	1.19	0.5	1	Sequest HT (2)	2	696.888	1.23	90.3922	28483	28483	O75347	ArgAcetylD3	RLEAAYLDLQR	11	2	90.392	164	11		N-Term(ArgAcetylD3)	Acetyl:2H(3)@Any N-term	0	27	QE	0.385382	LEAAYLDLQR	0.964577	0.9688	0.840555	0.603002	6	0.944986	0.974542	1	RR	TRUE	trypsin	0	13	5	0.277778	0
High	[R].sPSkPLPEVTDEYkNDVkNR.[S]	HCD	6.29	1.3e-05	5e-07	2.05	0.65	1	Sequest HT (2)	3	884.807	1.93	90.7967	28652	28652	P05455	ArgAcetylD3	RSPSKPLPEVTDEYKNDVKNR	21	3	90.797	165	21		N-Term(ArgAcetylD3);K4(Acetyl:2H(3));K14(Acetyl:2H(3));K18(Acetyl:2H(3))	Acetyl:2H(3)@Any N-term;Acetyl:2H(3)@K;Acetyl:2H(3)@K;Acetyl:2H(3)@K	0;5;15;19	27	QE	0.389064	SPSKPLPEVTDEYKNDVKNR	0.992605	0.993961	0.930001	0.703973	16	0.996346	0.988477	1	RR	TRUE	trypsin	5	26	4	0.133333	0.16129
High	[R].aMADPEVQQIMSDPAMR.[L]	HCD	4.45	2.3e-05	6.6e-05	1.13	0.6	1	Sequest HT (2)	3	697.666	-0.88	94.5362	30189	30189	P31948	ArgAcetylD3	RAMADPEVQQIMSDPAMR	18	3	94.536	166	18		N-Term(ArgAcetylD3)	Acetyl:2H(3)@Any N-term	0	27	QE	0.423055	AMADPEVQQIMSDPAMR	0.980719	0.98292	0.88217	0.700958	11	0.96651	0.996544	1	RR	TRUE	trypsin	1	18	6	0.25	0.0526316
High	[R].aMADPEVQQIMSDPAMR.[L]	HCD	4.05	1.3e-05	1e-07	2.35	0.66	1	Sequest HT (2)	2	1046	0.44	94.6033	30215	30215	P31948	ArgAcetylD3	RAMADPEVQQIMSDPAMR	18	2	94.603	167	18		N-Term(ArgAcetylD3)	Acetyl:2H(3)@Any N-term	0	27	QE	0.423664	AMADPEVQQIMSDPAMR	0.956813	0.958982	0.817031	0.503016	8	0.92062	0.997068	1	RR	TRUE	trypsin	7	9	1	0.1	0.4375
Medium	[R].vPFSLLR.[G]	HCD	1.79	0.012	0.17	-0.021	0.01	1	Sequest HT (2)	2	516.824	1.17	94.634	30227	30227	P04792	ArgAcetylD3	RVPFSLLR	8	2	94.634	168	8		N-Term(ArgAcetylD3)	Acetyl:2H(3)@Any N-term	0	27	QE	0.423945	VPFSLLR	0.853348	0.880266	0.685272	0.582375	5	0.301039	0.962738	1	RR	TRUE	trypsin	1	10	2	0.166667	0.0909091
High	[R].vLkkNPLkNLR.[I]	HCD	3.25	1.3e-05	2.4e-05	1.32	0.73	1	Sequest HT (2)	2	830.045	1.17	95.5291	30593	30593	P36578	ArgAcetylD3	RVLKKNPLKNLR	12	2	95.529	169	12		N-Term(ArgAcetylD3);K3(Acetyl:2H(3));K4(Acetyl:2H(3));K8(Acetyl:2H(3))	Acetyl:2H(3)@Any N-term;Acetyl:2H(3)@K;Acetyl:2H(3)@K;Acetyl:2H(3)@K	0;4;5;9	27	QE	0.432082	VLKKNPLKNLR	0.945311	0.953903	0.80595	0.569415	4	0.774522	0.972269	1	RR	TRUE	trypsin	1	9	4	0.307692	0.1
High	[R].vLkkNPLkNLR.[I]	HCD	3.74	2.3e-05	6.9e-05	1.12	0.79	1	Sequest HT (2)	3	553.699	-0.31	95.559	30606	30606	P36578	ArgAcetylD3	RVLKKNPLKNLR	12	3	95.559	170	12		N-Term(ArgAcetylD3);K3(Acetyl:2H(3));K4(Acetyl:2H(3));K8(Acetyl:2H(3))	Acetyl:2H(3)@Any N-term;Acetyl:2H(3)@K;Acetyl:2H(3)@K;Acetyl:2H(3)@K	0;4;5;9	27	QE	0.432355	VLKKNPLKNLR	0.971113	0.976093	0.860516	0.531853	8	0.92877	0.978418	1	RR	TRUE	trypsin	3	15	4	0.210526	0.166667
High	[R].vkTNVPVkLFAR.[S]	HCD	2.88	1.3e-05	2.8e-05	1.29	0.51	1	Sequest HT (2)	2	832.02	-2.45	95.5682	30610	30610	Q9UKM9	ArgAcetylD3	RVKTNVPVKLFAR	13	2	95.568	171	13		N-Term(ArgAcetylD3);K2(Acetyl:2H(3));K8(Acetyl:2H(3))	Acetyl:2H(3)@Any N-term;Acetyl:2H(3)@K;Acetyl:2H(3)@K	0;3;9	27	QE	0.432436	VKTNVPVKLFAR	0.962629	0.967421	0.837053	0.802703	4	0.878111	0.977245	1	RR	TRUE	trypsin	0	9	2	0.181818	0
High	[R].aMELLkVSkDkR.[A]	HCD	4.06	5.8e-05	0.00017	0.935	0.6	1	Sequest HT (2)	3	585.35	-2.07	96.5029	30991	30991	Q9Y3U8	ArgAcetylD3	RAMELLKVSKDKR	13	3	96.503	172	13		N-Term(ArgAcetylD3);K6(Acetyl:2H(3));K9(Acetyl:2H(3));K11(Acetyl:2H(3))	Acetyl:2H(3)@Any N-term;Acetyl:2H(3)@K;Acetyl:2H(3)@K;Acetyl:2H(3)@K	0;7;10;12	27	QE	0.440936	AMELLKVSKDKR	0.997493	0.997945	0.959178	0.7868	7	0.994622	0.99813	1	RR	TRUE	trypsin	2	16	2	0.111111	0.111111
High	[R].eLQALGFQPGPITDTTR.[D]	HCD	5.39	1.3e-05	2.9e-05	1.29	0.55	1	Sequest HT (2)	3	682.368	1.35	98.9525	31970	31970	Q8NC56	ArgAcetylD3	RELQALGFQPGPITDTTR	18	3	98.952	173	18		N-Term(ArgAcetylD3)	Acetyl:2H(3)@Any N-term	0	27	QE	0.4632	ELQALGFQPGPITDTTR	0.992252	0.993403	0.926834	0.753865	12	0.987799	0.994651	1	RR	TRUE	trypsin	3	22	3	0.12	0.12
High	[R].qELEQVLGIR.[L]	HCD	1.95	5.8e-05	0.00016	0.954	0.33	1	Sequest HT (2)	2	693.401	0.2	100.258	32489	32489	Q92925	ArgAcetylD3	RQELEQVLGIR	11	2	100.258	174	11		N-Term(ArgAcetylD3)	Acetyl:2H(3)@Any N-term	0	27	QE	0.475073	QELEQVLGIR	0.933278	0.939991	0.778335	0.528799	5	0.579839	0.971815	1	RR	TRUE	trypsin	1	12	4	0.25	0.0769231
High	[R].lLAEEEQQLLQR.[L]	HCD	3.98	0.00018	0.00073	0.656	0.62	1	Sequest HT (2)	3	557.646	-1.18	100.78	32689	32689	Q96F44	ArgAcetylD3	RLLAEEEQQLLQR	13	3	100.78	175	13		N-Term(ArgAcetylD3)	Acetyl:2H(3)@Any N-term	0	27	QE	0.479818	LLAEEEQQLLQR	0.988416	0.991138	0.915182	0.936496	8	0.990764	0.986743	1	RR	TRUE	trypsin	0	15	1	0.0625	0
High	[R].qLLLDTTDkFR.[F]	HCD	2.96	5.8e-05	0.00018	0.928	0.49	1	Sequest HT (2)	2	798.451	-4.82	101.351	32912	32912	O15020	ArgAcetylD3	RQLLLDTTDKFR	12	2	101.351	176	12		N-Term(ArgAcetylD3);K9(Acetyl:2H(3))	Acetyl:2H(3)@Any N-term;Acetyl:2H(3)@K	0;10	27	QE	0.485009	QLLLDTTDKFR	0.968567	0.974119	0.854847	0.678788	4	0.933259	0.986925	1	RR	TRUE	trypsin	0	11	4	0.266667	0
High	[R].lIGDAAkNQVAMNPTNTVFDAkR.[L]	HCD	6.8	1.3e-05	9.3e-09	2.8	0.83	1	Sequest HT (2)	3	922.492	-3.41	101.92	33133	33133	P11142	ArgAcetylD3	RLIGDAAKNQVAMNPTNTVFDAKR	24	3	101.92	177	24		N-Term(ArgAcetylD3);K7(Acetyl:2H(3));K22(Acetyl:2H(3))	Acetyl:2H(3)@Any N-term;Acetyl:2H(3)@K;Acetyl:2H(3)@K	0;8;23	27	QE	0.490182	LIGDAAKNQVAMNPTNTVFDAKR	0.985028	0.988401	0.902941	0.822095	15	0.980344	0.989264	0	ER	TRUE	trypsin	1	28	5	0.151515	0.0344828
High	[R].iLVATNLFGR.[G]	HCD	2.44	0.00018	0.00069	0.667	0.39	1	Sequest HT (2)	2	652.898	0.72	102.341	33295	33295	O00148; Q13838	ArgAcetylD3	RILVATNLFGR	11	2	102.341	178	11		N-Term(ArgAcetylD3)	Acetyl:2H(3)@Any N-term	0	27	QE	0.494009	ILVATNLFGR	0.818865	0.834918	0.62897	0.4303	3	0.428482	0.929173	1	RR;RR	TRUE	trypsin	0	7	6	0.461538	0
High	[R].yADLTEDQLPScESLkDTIAR.[A]	HCD	6.57	1.3e-05	2.4e-07	2.19	0.71	1	Sequest HT (2)	3	891.108	-1.89	102.567	33380	33380	P18669	ArgAcetylD3	RYADLTEDQLPSCESLKDTIAR	22	3	102.567	179	22		N-Term(ArgAcetylD3);C12(Carbamidomethyl);K16(Acetyl:2H(3))	Acetyl:2H(3)@Any N-term;Carbamidomethyl@C;Acetyl:2H(3)@K	0;13;17	27	QE	0.496064	YADLTEDQLPSCESLKDTIAR	0.995774	0.996432	0.946209	0.789754	12	0.992898	0.997712	1	RR	TRUE	trypsin	3	25	3	0.107143	0.107143
High	[R].qVQSLTcEVDALkGTNESLER.[Q]	HCD	7.62	1.3e-05	8.8e-09	2.81	0.77	1	Sequest HT (2)	3	875.114	0.71	102.579	33384	33384	P08670	ArgAcetylD3	RQVQSLTCEVDALKGTNESLER	22	3	102.579	180	22		N-Term(ArgAcetylD3);C7(Carbamidomethyl);K13(Acetyl:2H(3))	Acetyl:2H(3)@Any N-term;Carbamidomethyl@C;Acetyl:2H(3)@K	0;8;14	27	QE	0.496173	QVQSLTCEVDALKGTNESLER	0.993916	0.994763	0.934818	0.814964	19	0.976021	0.997635	1	RR	TRUE	trypsin	5	29	1	0.0333333	0.147059
High	[R].yADLTEDQLPScESLkDTIAR.[A]	HCD	2.26	0.00049	0.004	0.403	0.63	1	Sequest HT (2)	2	1336.16	-0.76	102.662	33417	33417	P18669	ArgAcetylD3	RYADLTEDQLPSCESLKDTIAR	22	2	102.662	181	22		N-Term(ArgAcetylD3);C12(Carbamidomethyl);K16(Acetyl:2H(3))	Acetyl:2H(3)@Any N-term;Carbamidomethyl@C;Acetyl:2H(3)@K	0;13;17	27	QE	0.496927	YADLTEDQLPSCESLKDTIAR	0.990757	0.991251	0.915729	0.73739	5	0.997959	0.977438	1	RR	TRUE	trypsin	0	9	5	0.357143	0
High	[R].qVQSLTcEVDALkGTNESLER.[Q]	HCD	1.77	0.00034	0.0021	0.489	0.63	1	Sequest HT (2)	2	1312.17	1.09	102.713	33437	33437	P08670	ArgAcetylD3	RQVQSLTCEVDALKGTNESLER	22	2	102.714	182	22		N-Term(ArgAcetylD3);C7(Carbamidomethyl);K13(Acetyl:2H(3))	Acetyl:2H(3)@Any N-term;Carbamidomethyl@C;Acetyl:2H(3)@K	0;8;14	27	QE	0.4974	QVQSLTCEVDALKGTNESLER	0.99305	0.993334	0.92645	0.819712	3	0.994904	0.992418	1	RR	TRUE	trypsin	1	7	2	0.222222	0.125
High	[R].iFQEPTEPkTkAAAPGVEDEPLLR.[E]	HCD	5.95	1.3e-05	2.7e-08	2.6	0.65	1	Sequest HT (2)	3	976.532	-0.12	102.996	33546	33546	P31350	ArgAcetylD3	RIFQEPTEPKTKAAAPGVEDEPLLR	25	3	102.996	183	25		N-Term(ArgAcetylD3);K9(Acetyl:2H(3));K11(Acetyl:2H(3))	Acetyl:2H(3)@Any N-term;Acetyl:2H(3)@K;Acetyl:2H(3)@K	0;10;12	27	QE	0.499964	IFQEPTEPKTKAAAPGVEDEPLLR	0.990751	0.991657	0.917706	0.807237	16	0.982272	0.993851	1	RR	TRUE	trypsin	4	27	2	0.0689655	0.129032
High	[R].vDILDPALLR.[S]	HCD	2.39	8.3e-05	0.00032	0.81	0.54	1	Sequest HT (2)	2	663.403	0.7	104.383	34089	34089	P17980	ArgAcetylD3	RVDILDPALLR	11	2	104.383	184	11		N-Term(ArgAcetylD3)	Acetyl:2H(3)@Any N-term	0	27	QE	0.512573	VDILDPALLR	0.994138	0.994749	0.934733	0.583771	7	0.989569	0.997801	0	NR	TRUE	trypsin	3	14	2	0.125	0.176471
High	[R].vVDLMAHMASkE.[-]	HCD	3	0.00046	0.0033	0.427	0.65	1	Sequest HT (2)	3	526.274	-1.04	105.034	34342	34342	P04406	ArgAcetylD3	RVVDLMAHMASKE	13	3	105.034	185	13		N-Term(ArgAcetylD3);K11(Acetyl:2H(3))	Acetyl:2H(3)@Any N-term;Acetyl:2H(3)@K	0;12	27	QE	0.518491	VVDLMAHMASKE	0.934533	0.944182	0.78629	0.718682	12	0.925557	0.995158	0	NR	TRUE	trypsin	3	11	1	0.0833333	0.214286
High	[R].vEkkANkLAFkLEkR.[Q]	HCD	5.39	1.3e-05	4.5e-06	1.64	0.7	1	Sequest HT (2)	3	743.464	-0.86	107.228	35207	35207	Q96GA3	ArgAcetylD3	RVEKKANKLAFKLEKR	16	3	107.228	186	16		N-Term(ArgAcetylD3);K3(Acetyl:2H(3));K4(Acetyl:2H(3));K7(Acetyl:2H(3));K11(Acetyl:2H(3));K14(Acetyl:2H(3))	Acetyl:2H(3)@Any N-term;Acetyl:2H(3)@K;Acetyl:2H(3)@K;Acetyl:2H(3)@K;Acetyl:2H(3)@K;Acetyl:2H(3)@K	0;4;5;8;12;15	27	QE	0.538436	VEKKANKLAFKLEKR	0.994616	0.995514	0.939674	0.929008	12	0.996797	0.996964	1	RR	TRUE	trypsin	0	24	2	0.0769231	0
Low	[R].nSLDSFGGR.[N]	HCD	0.81	0.67	1	-0.893	0.22	1	Sequest HT (2)	1	1153.58	3.22	108.863	35855	35855	Q5BKZ1	ArgAcetylD3	RNSLDSFGGR	10	1	108.863	187	10		N-Term(ArgAcetylD3)	Acetyl:2H(3)@Any N-term	0	27	QE	0.5533	NSLDSFGGR	0.326137	0.386165	0.252401	0.0903475	3	0.96911	0.176023	0	YR	TRUE	trypsin	5	2	2	0.5	0.714286
High	[R].qGLEQFINkIAGHPLAQNER.[C]	HCD	6.62	1.3e-05	1.2e-09	3.19	0.36	1	Sequest HT (2)	3	837.123	0.12	109.663	36182	36182	Q9UMY4	ArgAcetylD3	RQGLEQFINKIAGHPLAQNER	21	3	109.663	188	21		N-Term(ArgAcetylD3);K9(Acetyl:2H(3))	Acetyl:2H(3)@Any N-term;Acetyl:2H(3)@K	0;10	27	QE	0.560573	QGLEQFINKIAGHPLAQNER	0.991239	0.992173	0.920299	0.671472	15	0.97852	0.993949	1	RR	TRUE	trypsin	6	30	5	0.142857	0.166667
High	[R].lPGAIDVIGQTITISR.[V]	HCD	2.12	0.00045	0.003	0.439	0.38	1	Sequest HT (2)	2	928.045	-0.65	110.726	36602	36602	Q6UN15	ArgAcetylD3	RLPGAIDVIGQTITISR	17	2	110.726	189	17		N-Term(ArgAcetylD3)	Acetyl:2H(3)@Any N-term	0	27	QE	0.570236	LPGAIDVIGQTITISR	0.932681	0.940449	0.779191	0.345353	4	0.888122	0.967688	1	RR	TRUE	trypsin	4	8	6	0.428571	0.333333
High	[R].lPGAIDVIGQTITISR.[V]	HCD	3.51	5e-05	9.4e-05	1.05	0.44	1	Sequest HT (2)	3	619.033	-0.5	110.896	36672	36672	Q6UN15	ArgAcetylD3	RLPGAIDVIGQTITISR	17	3	110.896	190	17		N-Term(ArgAcetylD3)	Acetyl:2H(3)@Any N-term	0	27	QE	0.571782	LPGAIDVIGQTITISR	0.969303	0.973225	0.85235	0.66369	11	0.994064	0.914347	1	RR	TRUE	trypsin	2	18	5	0.217391	0.1
High	[R].eALEkTEkQLEAIDQLHLEYAkR.[A]	HCD	7.68	1.3e-05	1.2e-10	3.62	0.72	1	Sequest HT (2)	3	1031.23	0.51	111.031	36727	36727	O43707	ArgAcetylD3	REALEKTEKQLEAIDQLHLEYAKR	24	3	111.031	191	24		N-Term(ArgAcetylD3);K5(Acetyl:2H(3));K8(Acetyl:2H(3));K22(Acetyl:2H(3))	Acetyl:2H(3)@Any N-term;Acetyl:2H(3)@K;Acetyl:2H(3)@K;Acetyl:2H(3)@K	0;6;9;23	27	QE	0.573009	EALEKTEKQLEAIDQLHLEYAKR	0.880404	0.913468	0.733213	0.730985	21	0.923579	0.862944	1	RR	TRUE	trypsin	2	37	8	0.177778	0.0512821
High	[R].gMTVEGLkQFIAAQGSSR.[S]	HCD	4.77	3.2e-05	8.8e-05	1.07	0.55	1	Sequest HT (2)	3	709.379	-2.8	113.646	37751	37751	P07814	ArgAcetylD3	RGMTVEGLKQFIAAQGSSR	19	3	113.646	192	19		N-Term(ArgAcetylD3);K8(Acetyl:2H(3))	Acetyl:2H(3)@Any N-term;Acetyl:2H(3)@K	0;9	27	QE	0.596782	GMTVEGLKQFIAAQGSSR	0.992313	0.993718	0.928607	0.843125	10	0.976607	0.9975	1	RR	TRUE	trypsin	1	21	3	0.125	0.0454545
High	[R].aRPGLEGLLAGVDNNLVELEAAR.[V]	HCD	6.17	1.3e-05	3.1e-07	2.14	0.67	1	Sequest HT (2)	3	860.142	-0.59	114.496	38083	38083	Q9BRZ2	ArgAcetylD3	RARPGLEGLLAGVDNNLVELEAAR	24	3	114.496	193	24		N-Term(ArgAcetylD3)	Acetyl:2H(3)@Any N-term	0	27	QE	0.604509	ARPGLEGLLAGVDNNLVELEAAR	0.942121	0.950817	0.799507	0.753402	15	0.948188	0.936294	NA	NA	FALSE	trypsin	3	23	3	0.115385	0.115385
High	[R].lFTkVkPLLQVSR.[Q]	HCD	2.27	0.0058	0.079	0.074	0.54	1	Sequest HT (2)	2	910.577	-0.26	115.583	38497	38497	P35579	ArgAcetylD3	RLFTKVKPLLQVSR	14	2	115.583	194	14		N-Term(ArgAcetylD3);K4(Acetyl:2H(3));K6(Acetyl:2H(3))	Acetyl:2H(3)@Any N-term;Acetyl:2H(3)@K;Acetyl:2H(3)@K	0;5;7	27	QE	0.614391	LFTKVKPLLQVSR	0.938717	0.946485	0.790787	0.588107	3	0.773029	0.978258	0	WR	TRUE	trypsin	1	8	4	0.333333	0.111111
High	[R].eILGTckMLGQMTDQVADLR.[A]	HCD	6	1.3e-05	1.3e-06	1.87	0.67	1	Sequest HT (2)	3	842.43	-0.96	115.86	38604	38604	P18206	ArgAcetylD3	REILGTCKMLGQMTDQVADLR	21	3	115.86	195	21		N-Term(ArgAcetylD3);C6(Carbamidomethyl);K7(Acetyl:2H(3))	Acetyl:2H(3)@Any N-term;Carbamidomethyl@C;Acetyl:2H(3)@K	0;7;8	27	QE	0.616909	EILGTCKMLGQMTDQVADLR	0.920546	0.934933	0.769082	0.642405	12	0.755374	0.972176	1	RR	TRUE	trypsin	3	23	6	0.206897	0.115385
High	[R].nPIYSLIDkkkQFR.[S]	HCD	4.48	1.3e-05	8.1e-06	1.53	0.7	1	Sequest HT (2)	3	696.078	0.12	116.498	38849	38849	Q9H5J8	ArgAcetylD3	RNPIYSLIDKKKQFR	15	3	116.498	196	15		N-Term(ArgAcetylD3);K9(Acetyl:2H(3));K10(Acetyl:2H(3));K11(Acetyl:2H(3))	Acetyl:2H(3)@Any N-term;Acetyl:2H(3)@K;Acetyl:2H(3)@K;Acetyl:2H(3)@K	0;10;11;12	27	QE	0.622709	NPIYSLIDKKKQFR	0.983189	0.987215	0.898092	0.751538	11	0.956215	0.995709	1	RR	TRUE	trypsin	1	20	5	0.2	0.047619
High	[R].iLNEDGSPNLDFkPEDQPHFDIkDEF.[-]	HCD	2.12	0.0024	0.03	0.179	0.52	1	Sequest HT (2)	3	1117.54	-3.34	123.218	41390	41390	Q9UMX5	ArgAcetylD3	RILNEDGSPNLDFKPEDQPHFDIKDEF	27	3	123.218	197	27		N-Term(ArgAcetylD3);K13(Acetyl:2H(3));K23(Acetyl:2H(3))	Acetyl:2H(3)@Any N-term;Acetyl:2H(3)@K;Acetyl:2H(3)@K	0;14;24	27	QE	0.6838	ILNEDGSPNLDFKPEDQPHFDIKDEF	0.924746	0.930434	0.761139	0.561368	10	0.936169	0.977777	1	RR	TRUE	trypsin	0	12	11	0.478261	0
High	[R].ePFLLSGGDDGALkIWDLR.[Q]	HCD	4.96	1.3e-05	1.4e-05	1.42	0.61	1	Sequest HT (2)	3	783.424	2.19	125.256	42162	42162	Q9BQ67	ArgAcetylD3	REPFLLSGGDDGALKIWDLR	20	3	125.256	198	20		N-Term(ArgAcetylD3);K14(Acetyl:2H(3))	Acetyl:2H(3)@Any N-term;Acetyl:2H(3)@K	0;15	27	QE	0.702327	EPFLLSGGDDGALKIWDLR	0.942243	0.953209	0.804483	0.533971	14	0.882687	0.960787	1	RR	TRUE	trypsin	4	23	9	0.28125	0.148148
High	[R].dELLAQHAAGALGLPDLVAVLTR.[V]	HCD	7.61	1.3e-05	5.8e-10	3.33	0.76	1	Sequest HT (2)	3	848.817	1.21	125.682	42323	42323	P58107	ArgAcetylD3	RDELLAQHAAGALGLPDLVAVLTR	24	3	125.682	199	24		N-Term(ArgAcetylD3)	Acetyl:2H(3)@Any N-term	0	27	QE	0.7062	DELLAQHAAGALGLPDLVAVLTR	0.926823	0.938632	0.775812	0.674013	19	0.885595	0.994864	1	RR	TRUE	trypsin	5	32	5	0.135135	0.135135
High	[R].dELLAQHAAGALGLPDLVAVLTR.[V]	HCD	5.69	1.3e-05	5.4e-07	2.04	0.72	1	Sequest HT (2)	4	636.864	0.25	125.751	42349	42349	P58107	ArgAcetylD3	RDELLAQHAAGALGLPDLVAVLTR	24	4	125.751	200	24		N-Term(ArgAcetylD3)	Acetyl:2H(3)@Any N-term	0	27	QE	0.706827	DELLAQHAAGALGLPDLVAVLTR	0.849209	0.872478	0.674976	0.668203	16	0.732654	0.988628	1	RR	TRUE	trypsin	4	24	4	0.142857	0.142857
Low	[R].sSGMTLDNISR.[A]	HCD	0.54	0.83	1	-1.81	0.15	1	Sequest HT (2)	2	691.353	3.49	131.228	44651	44651	Q99807	ArgAcetylD3	RSSGMTLDNISR	12	2	131.228	201	12		N-Term(ArgAcetylD3)	Acetyl:2H(3)@Any N-term	0	27	QE	0.756618	SSGMTLDNISR	-0.0726909	0.00171711	0.00109315	-0.525934	2	-0.0859775	-0.104808	0	FR	TRUE	trypsin	2	1	13	0.928571	0.666667
High	[R].gPREPGPAGRGDGDSGR.[S]	HCD	3.82	5.8e-05	0.00016	0.95	0.57	1	Sequest HT (2)	4	460.481	-0.34	39.4923	7282	7282	P58107	ArgAcetylD3	RGPREPGPAGRGDGDSGR	18	4	39.492	202	18		N-Term(ArgAcetylD3)	Acetyl:2H(3)@Any N-term	0	27	QE	-0.0773455	GPREPGPAGRGDGDSGR	0.899775	0.914567	0.734937	0.765011	5	0.835139	0.906437	0	WR	TRUE	trypsin	2	13	2	0.133333	0.133333
High	[R].gSQGDSkQQNGPPR.[K]	HCD	2.43	8.3e-05	0.00028	0.836	0.66	1	Sequest HT (2)	3	567.956	0.63	39.6093	7325	7325	Q96HC4	ArgAcetylD3	RGSQGDSKQQNGPPR	15	3	39.609	203	15		N-Term(ArgAcetylD3);K7(Acetyl:2H(3))	Acetyl:2H(3)@Any N-term;Acetyl:2H(3)@K	0;8	27	QE	-0.0762818	GSQGDSKQQNGPPR	0.957038	0.962431	0.824942	0.682092	4	0.948708	0.96125	1	RR	TRUE	trypsin	0	11	5	0.3125	0
High	[R].dHDNkQkSDDRGESER.[H]	HCD	4.07	1.3e-05	3.2e-05	1.27	0.65	1	Sequest HT (2)	4	552.515	0.33	39.7883	7393	7393	Q6KC79	ArgAcetylD3	RDHDNKQKSDDRGESER	17	4	39.788	204	17		N-Term(ArgAcetylD3);K5(Acetyl:2H(3));K7(Acetyl:2H(3))	Acetyl:2H(3)@Any N-term;Acetyl:2H(3)@K;Acetyl:2H(3)@K	0;6;8	27	QE	-0.0746545	DHDNKQKSDDRGESER	0.985713	0.988511	0.903404	0.823626	10	0.959932	0.990314	1	RR	TRUE	trypsin	0	20	4	0.166667	0
Medium	[R].lNHSPPQSSSR.[Y]	HCD	0.82	0.019	0.29	-0.087	0.22	1	Sequest HT (2)	3	470.913	-3.01	40.4494	7632	7632	Q5T8P6	ArgAcetylD3	RLNHSPPQSSSR	12	3	40.449	205	12		N-Term(ArgAcetylD3)	Acetyl:2H(3)@Any N-term	0	27	QE	-0.0686455	LNHSPPQSSSR	0.809587	0.835116	0.629199	0.383087	3	0.844595	0.803076	1	RR	TRUE	trypsin	0	7	8	0.533333	0
High	[R].gSQGDSkQQNGPPR.[K]	HCD	1.28	0.0021	0.024	0.201	0.38	1	Sequest HT (2)	3	567.956	0.02	40.4863	7646	7646	Q96HC4	ArgAcetylD3	RGSQGDSKQQNGPPR	15	3	40.486	206	15		N-Term(ArgAcetylD3);K7(Acetyl:2H(3))	Acetyl:2H(3)@Any N-term;Acetyl:2H(3)@K	0;8	27	QE	-0.0683091	GSQGDSKQQNGPPR	0.522829	0.567953	0.384529	0.102119	1	0.3925	0.601706	1	RR	TRUE	trypsin	0	4	12	0.75	0
High	[R].eAPGPAGGGGGGSR.[W]	HCD	1.87	0.00068	0.0058	0.358	0.48	1	Sequest HT (2)	2	664.331	-0.11	41.6962	8090	8090	Q9BQ61	ArgAcetylD3	REAPGPAGGGGGGSR	15	2	41.696	207	15		N-Term(ArgAcetylD3)	Acetyl:2H(3)@Any N-term	0	27	QE	-0.0573091	EAPGPAGGGGGGSR	0.887157	0.899313	0.711866	0.603281	2	0.628765	0.93086	0	GR	TRUE	trypsin	0	7	5	0.416667	0
Low	[R].eGPTVETkR.[I]	HCD	2	0.32	0.99	-0.513	0.39	1	Sequest HT (2)	3	421.568	-6.59	41.7839	8125	8125	Q96AT1	ArgAcetylD3	REGPTVETKR	10	3	41.784	208	10		N-Term(ArgAcetylD3);K8(Acetyl:2H(3))	Acetyl:2H(3)@Any N-term;Acetyl:2H(3)@K	0;9	27	QE	-0.0565091	EGPTVETKR	0.779588	0.799658	0.589971	0.0182754	3	-0.0826321	0.895153	0	YR	TRUE	trypsin	2	5	7	0.583333	0.285714
Low	[R].gSSDPTVQR.[S]	HCD	1.63	0.082	0.75	-0.273	0.5	1	Sequest HT (2)	2	574.299	1.49	41.8065	8134	8134	Q2KHT3	ArgAcetylD3	RGSSDPTVQR	10	2	41.806	209	10		N-Term(ArgAcetylD3)	Acetyl:2H(3)@Any N-term	0	27	QE	-0.0563091	GSSDPTVQR	0.992436	0.9924	0.92146	0.201287	2	0.99036	0.99519	1	RR	TRUE	trypsin	2	4	5	0.555556	0.333333
High	[R].sTSEkSkQR.[L]	HCD	1.76	0.00022	0.0011	0.587	0.55	1	Sequest HT (2)	2	671.375	-0.21	42.0285	8223	8223	Q15149	ArgAcetylD3	RSTSEKSKQR	10	2	42.028	210	10		N-Term(ArgAcetylD3);K5(Acetyl:2H(3));K7(Acetyl:2H(3))	Acetyl:2H(3)@Any N-term;Acetyl:2H(3)@K;Acetyl:2H(3)@K	0;6;8	27	QE	-0.0542909	STSEKSKQR	0.803074	0.830952	0.624407	0.204376	2	0.320808	0.887148	0	SR	TRUE	trypsin	2	6	5	0.454545	0.25
High	[R].gESMQPNR.[A]	HCD	1.96	0.002	0.022	0.211	0.38	1	Sequest HT (2)	2	560.274	0.11	42.0766	8242	8242	O75821	ArgAcetylD3	RGESMQPNR	9	2	42.077	211	9		N-Term(ArgAcetylD3)	Acetyl:2H(3)@Any N-term	0	27	QE	-0.0538455	GESMQPNR	0.891009	0.9135	0.733262	0.621151	5	0.81451	0.916049	1	RR	TRUE	trypsin	1	9	2	0.181818	0.1
High	[R].qEVADHPkR.[F]	HCD	1.86	0.0042	0.058	0.111	0.44	1	Sequest HT (2)	3	442.577	-2.15	42.4926	8397	8397	Q8WV44	ArgAcetylD3	RQEVADHPKR	10	3	42.493	212	10		N-Term(ArgAcetylD3);K8(Acetyl:2H(3))	Acetyl:2H(3)@Any N-term;Acetyl:2H(3)@K	0;9	27	QE	-0.0500636	QEVADHPKR	0.963777	0.966308	0.834275	0.423681	3	0.975612	0.972603	1	RR	TRUE	trypsin	0	8	8	0.5	0
High	[R].skTkEAR.[K]	HCD	1.96	0.00018	0.00073	0.657	0.43	1	Sequest HT (2)	2	555.833	0.16	42.7439	8495	8495	P84098	ArgAcetylD3	RSKTKEAR	8	2	42.744	213	8		N-Term(ArgAcetylD3);K2(Acetyl:2H(3));K4(Acetyl:2H(3))	Acetyl:2H(3)@Any N-term;Acetyl:2H(3)@K;Acetyl:2H(3)@K	0;3;5	27	QE	-0.0477818	SKTKEAR	0.959928	0.96695	0.835871	0.420909	4	0.887784	0.970509	1	RR	TRUE	trypsin	2	7	3	0.3	0.222222
High	[R].aEATAASTSR.[S]	HCD	1.43	0.0032	0.043	0.141	0.22	1	Sequest HT (2)	2	583.304	0.1	42.809	8519	8519	O95721	ArgAcetylD3	RAEATAASTSR	11	2	42.809	214	11		N-Term(ArgAcetylD3)	Acetyl:2H(3)@Any N-term	0	27	QE	-0.0471909	AEATAASTSR	0.820527	0.840753	0.635774	0.534615	3	0.266702	0.908702	1	RR	TRUE	trypsin	1	7	3	0.3	0.125
High	[R].skTkEAR.[K]	HCD	1.88	0.0073	0.1	0.043	0.38	1	Sequest HT (2)	2	555.832	-0.37	43.257	8684	8684	P84098	ArgAcetylD3	RSKTKEAR	8	2	43.257	215	8		N-Term(ArgAcetylD3);K2(Acetyl:2H(3));K4(Acetyl:2H(3))	Acetyl:2H(3)@Any N-term;Acetyl:2H(3)@K;Acetyl:2H(3)@K	0;3;5	27	QE	-0.0431182	SKTKEAR	0.954578	0.960244	0.819888	0.629721	3	0.915079	0.963451	1	RR	TRUE	trypsin	0	7	3	0.3	0
Low	[R].aEATAASTSR.[S]	HCD	1.16	0.06	0.67	-0.233	0.34	1	Sequest HT (2)	2	583.304	0.43	43.3241	8710	8710	O95721	ArgAcetylD3	RAEATAASTSR	11	2	43.324	216	11		N-Term(ArgAcetylD3)	Acetyl:2H(3)@Any N-term	0	27	QE	-0.0425091	AEATAASTSR	0.769139	0.782394	0.572003	0.321013	2	0.191889	0.85824	1	RR	TRUE	trypsin	1	5	5	0.5	0.166667
Low	[R].gASQAGmTGYGRPR.[Q]	HCD	1.39	0.16	0.91	-0.375	0.19	1	Sequest HT (2)	3	542.605	0.68	43.443	8757	8757	Q01995	ArgAcetylD3	RGASQAGMTGYGRPR	15	3	43.443	217	15		N-Term(ArgAcetylD3);M7(Oxidation)	Acetyl:2H(3)@Any N-term;Oxidation@M	0;8	27	QE	-0.0414273	GASQAGMTGYGRPR	0.393661	0.458961	0.303556	0.123718	5	0.166576	0.876202	0	NR	TRUE	trypsin	2	6	10	0.625	0.25
High	[R].skTkEAR.[K]	HCD	2.02	0.00083	0.0076	0.329	0.41	1	Sequest HT (2)	2	555.832	-0.24	43.7888	8892	8892	P84098	ArgAcetylD3	RSKTKEAR	8	2	43.789	218	8		N-Term(ArgAcetylD3);K2(Acetyl:2H(3));K4(Acetyl:2H(3))	Acetyl:2H(3)@Any N-term;Acetyl:2H(3)@K;Acetyl:2H(3)@K	0;3;5	27	QE	-0.0382818	SKTKEAR	0.958662	0.963835	0.828267	0.412425	4	0.901475	0.967748	1	RR	TRUE	trypsin	1	6	4	0.4	0.142857
High	[R].gSQGDSkQQNGPPR.[K]	HCD	3.29	1.3e-05	3.8e-07	2.1	0.78	1	Sequest HT (2)	2	851.43	-0.68	43.8651	8925	8925	Q96HC4	ArgAcetylD3	RGSQGDSKQQNGPPR	15	2	43.865	219	15		N-Term(ArgAcetylD3);K7(Acetyl:2H(3))	Acetyl:2H(3)@Any N-term;Acetyl:2H(3)@K	0;8	27	QE	-0.0375909	GSQGDSKQQNGPPR	0.955605	0.958585	0.816141	0.323103	6	0.955108	0.957095	1	RR	TRUE	trypsin	7	7	2	0.222222	0.5
High	[R].gSQGDSkQQNGPPR.[K]	HCD	4.26	2.3e-05	6.5e-05	1.13	0.63	1	Sequest HT (2)	3	567.956	0.07	43.9152	8944	8944	Q96HC4	ArgAcetylD3	RGSQGDSKQQNGPPR	15	3	43.915	220	15		N-Term(ArgAcetylD3);K7(Acetyl:2H(3))	Acetyl:2H(3)@Any N-term;Acetyl:2H(3)@K	0;8	27	QE	-0.0371364	GSQGDSKQQNGPPR	0.992131	0.99336	0.926595	0.692481	10	0.991239	0.992539	1	RR	TRUE	trypsin	5	15	1	0.0625	0.25
Low	[R].qEmQEVQSSR.[S]	HCD	0.6	0.14	0.88	-0.354	0.07	1	Sequest HT (2)	2	719.843	0.01	43.9615	8965	8965	P22626	ArgAcetylD3	RQEMQEVQSSR	11	2	43.962	221	11		N-Term(ArgAcetylD3);M3(Oxidation)	Acetyl:2H(3)@Any N-term;Oxidation@M	0;4	27	QE	-0.0367091	QEMQEVQSSR	0.743445	0.743708	0.53387	0.231144	0	NA	0.872801	0	SR	TRUE	trypsin	0	2	7	0.777778	0
High	[R].lGPGSSGGSAR.[E]	HCD	1.72	0.0043	0.059	0.109	0.37	1	Sequest HT (2)	2	573.806	-1.34	45.1734	9437	9437	P17152	ArgAcetylD3	RLGPGSSGGSAR	12	2	45.173	222	12		N-Term(ArgAcetylD3)	Acetyl:2H(3)@Any N-term	0	27	QE	-0.0257	LGPGSSGGSAR	0.880578	0.890444	0.699212	0.396194	1	0.238338	0.936369	1	RR	TRUE	trypsin	1	5	5	0.5	0.166667
High	[R].dHFEEAmR.[F]	HCD	2.74	0.00026	0.0014	0.552	0.61	1	Sequest HT (2)	3	417.859	0.07	46.4645	9985	9985	P55072	ArgAcetylD3	RDHFEEAMR	9	3	46.464	223	9		N-Term(ArgAcetylD3);M7(Oxidation)	Acetyl:2H(3)@Any N-term;Oxidation@M	0;8	27	QE	-0.0139636	DHFEEAMR	0.985475	0.987625	0.899745	0.842009	9	0.993733	0.974772	1	RR	TRUE	trypsin	1	12	1	0.0769231	0.0769231
High	[R].gVSREEIER.[E]	HCD	1.84	0.0022	0.027	0.191	0.17	1	Sequest HT (2)	3	425.899	-1.01	47.1054	10246	10246	O43293; Q9UIK4	ArgAcetylD3	RGVSREEIER	10	3	47.105	224	10		N-Term(ArgAcetylD3)	Acetyl:2H(3)@Any N-term	0	27	QE	-0.00813636	GVSREEIER	0.807268	0.82606	0.618846	0.412226	7	0.802156	0.813806	1	RR;RR	TRUE	trypsin	2	12	4	0.25	0.142857
High	[R].kkIDRNPR.[V]	HCD	2.6	0.0029	0.038	0.154	0.52	1	Sequest HT (2)	3	439.94	-0.54	47.2589	10308	10308	Q9NQZ2	ArgAcetylD3	RKKIDRNPR	9	3	47.259	225	9		N-Term(ArgAcetylD3);K1(Acetyl:2H(3));K2(Acetyl:2H(3))	Acetyl:2H(3)@Any N-term;Acetyl:2H(3)@K;Acetyl:2H(3)@K	0;2;3	27	QE	-0.00673636	KKIDRNPR	0.89607	0.91808	0.740522	0.430718	6	0.882717	0.9125	1	RR	TRUE	trypsin	1	9	5	0.357143	0.1
High	[R].kSTLASR.[L]	HCD	2.06	0.00069	0.006	0.356	0.44	1	Sequest HT (2)	2	504.807	0.01	48.0789	10648	10648	Q8IZ83	ArgAcetylD3	RKSTLASR	8	2	48.079	226	8		N-Term(ArgAcetylD3);K1(Acetyl:2H(3))	Acetyl:2H(3)@Any N-term;Acetyl:2H(3)@K	0;2	27	QE	0.000718182	KSTLASR	0.827081	0.861117	0.66047	0.406951	4	0.657755	0.840925	1	RR	TRUE	trypsin	1	9	3	0.25	0.1
High	[R].gPEEDRFSR.[G]	HCD	3.08	5.8e-05	0.00018	0.93	0.56	1	Sequest HT (2)	3	431.884	0.44	48.1029	10660	10660	Q14152	ArgAcetylD3	RGPEEDRFSR	10	3	48.103	227	10		N-Term(ArgAcetylD3)	Acetyl:2H(3)@Any N-term	0	27	QE	0.000936364	GPEEDRFSR	0.816204	0.858425	0.657114	0.709524	5	0.836991	0.800543	1	RR	TRUE	trypsin	0	13	3	0.1875	0
High	[R].tNTLkTR.[D]	HCD	1.53	0.0033	0.044	0.139	0.43	1	Sequest HT (2)	2	540.325	-0.71	48.1698	10690	10690	P46087	ArgAcetylD3	RTNTLKTR	8	2	48.17	228	8		N-Term(ArgAcetylD3);K5(Acetyl:2H(3))	Acetyl:2H(3)@Any N-term;Acetyl:2H(3)@K	0;6	27	QE	0.00154545	TNTLKTR	0.903022	0.904742	0.719872	0.261905	0	NA	0.949387	0	LR	TRUE	trypsin	1	6	4	0.4	0.142857
Low	[R].gPEEDRFSR.[G]	HCD	0.96	0.22	0.95	-0.43	0.08	1	Sequest HT (2)	2	647.321	-2.05	48.1871	10696	10696	Q14152	ArgAcetylD3	RGPEEDRFSR	10	2	48.187	229	10		N-Term(ArgAcetylD3)	Acetyl:2H(3)@Any N-term	0	27	QE	0.0017	GPEEDRFSR	0.7744	0.814071	0.605507	0.216731	6	0.414068	0.950074	1	RR	TRUE	trypsin	1	9	8	0.470588	0.1
High	[R].dSRPEPkPDkSR.[L]	HCD	3.36	5e-05	0.00011	1.02	0.54	1	Sequest HT (2)	3	568.311	0.13	48.3201	10754	10754	A1X283	ArgAcetylD3	RDSRPEPKPDKSR	13	3	48.32	230	13		N-Term(ArgAcetylD3);K7(Acetyl:2H(3));K10(Acetyl:2H(3))	Acetyl:2H(3)@Any N-term;Acetyl:2H(3)@K;Acetyl:2H(3)@K	0;8;11	27	QE	0.00290909	DSRPEPKPDKSR	0.736682	0.781777	0.571373	0.349598	6	0.638223	0.763492	NA	NA	FALSE	trypsin	3	11	5	0.3125	0.214286
High	[R].tVVDSEGR.[T]	HCD	2.16	0.00028	0.0016	0.53	0.33	1	Sequest HT (2)	2	532.282	0.03	48.7006	10904	10904	O00165	ArgAcetylD3	RTVVDSEGR	9	2	48.701	231	9		N-Term(ArgAcetylD3)	Acetyl:2H(3)@Any N-term	0	27	QE	0.00637273	TVVDSEGR	0.925844	0.942031	0.782173	0.754582	5	0.886972	0.941143	1	RR	TRUE	trypsin	0	11	2	0.153846	0
High	[R].sVSDNDIR.[K]	HCD	2.27	0.00047	0.0035	0.421	0.32	1	Sequest HT (2)	2	553.784	-2.34	48.9277	10997	10997	P55072	ArgAcetylD3	RSVSDNDIR	9	2	48.928	232	9		N-Term(ArgAcetylD3)	Acetyl:2H(3)@Any N-term	0	27	QE	0.00843636	SVSDNDIR	0.985149	0.986905	0.896859	0.664406	4	0.944495	0.995811	1	RR	TRUE	trypsin	0	9	3	0.25	0
High	[R].tVQQLR.[LS]	HCD	1.57	0.0043	0.058	0.109	0.13	1	Sequest HT (2)	2	473.287	0.31	49.1435	11084	11084	Q9UBI6; P56962	ArgAcetylD3	RTVQQLR	7	2	49.144	233	7		N-Term(ArgAcetylD3)	Acetyl:2H(3)@Any N-term	0	27	QE	0.0104	TVQQLR	0.691186	0.745836	0.535899	0.411304	3	0.580611	0.683747	0.5	RR;GR	TRUE	trypsin	0	8	4	0.333333	0
High	[R].gQPASSFSR.[K]	HCD	2.7	0.00013	0.0005	0.726	0.37	1	Sequest HT (2)	2	569.296	0.57	49.318	11159	11159	Q7KZ85	ArgAcetylD3	RGQPASSFSR	10	2	49.318	234	10		N-Term(ArgAcetylD3)	Acetyl:2H(3)@Any N-term	0	27	QE	0.0119818	GQPASSFSR	0.885072	0.90311	0.717443	0.336036	7	0.208994	0.952329	0	DR	TRUE	trypsin	4	9	2	0.181818	0.307692
High	[R].qPkYPR.[K]	HCD	1.54	0.0057	0.076	0.079	0.28	1	Sequest HT (2)	2	517.804	0.2	49.5793	11266	11266	P62750	ArgAcetylD3	RQPKYPR	7	2	49.579	235	7		N-Term(ArgAcetylD3);K3(Acetyl:2H(3))	Acetyl:2H(3)@Any N-term;Acetyl:2H(3)@K	0;4	27	QE	0.0143545	QPKYPR	0.748965	0.811713	0.602929	0.56	4	0.332551	0.89826	1	RR	TRUE	trypsin	1	8	2	0.2	0.111111
Low	[R].sPGRPPkSAR.[S]	HCD	1.12	0.6	1	-0.776	0.16	1	Sequest HT (2)	2	649.885	4.69	49.6334	11289	11289	Q14739	ArgAcetylD3	RSPGRPPKSAR	11	2	49.633	236	11		N-Term(ArgAcetylD3);K7(Acetyl:2H(3))	Acetyl:2H(3)@Any N-term;Acetyl:2H(3)@K	0;8	27	QE	0.0148455	SPGRPPKSAR	0.730731	0.743354	0.533532	0.281801	2	0.180017	0.815892	0	SR	TRUE	trypsin	1	2	5	0.714286	0.333333
High	[R].fSEGTSADR.[E]	HCD	1.75	0.0032	0.042	0.144	0.39	1	Sequest HT (2)	2	585.782	-0.66	49.7811	11355	11355	P62333	ArgAcetylD3	RFSEGTSADR	10	2	49.781	237	10		N-Term(ArgAcetylD3)	Acetyl:2H(3)@Any N-term	0	27	QE	0.0161909	FSEGTSADR	0.965346	0.968047	0.838633	0.633076	4	0.7527	0.986487	1	RR	TRUE	trypsin	1	7	2	0.222222	0.125
Low	[R].vEQLAGER.[H]	HCD	1.36	0.077	0.74	-0.265	0.02	1	Sequest HT (2)	2	551.806	0.57	49.9027	11407	11407	Q3KQV9	ArgAcetylD3	RVEQLAGER	9	2	49.903	238	9		N-Term(ArgAcetylD3)	Acetyl:2H(3)@Any N-term	0	27	QE	0.0173	VEQLAGER	0.93787	0.931599	0.763171	-0.0313417	3	0.509308	0.96224	1	RR	TRUE	trypsin	1	6	8	0.571429	0.142857
High	[R].vkTQSESGDVSR.[N]	HCD	2.2	0.00035	0.0022	0.483	0.46	1	Sequest HT (2)	2	769.904	-1.72	50.1341	11504	11504	P29375	ArgAcetylD3	RVKTQSESGDVSR	13	2	50.134	239	13		N-Term(ArgAcetylD3);K2(Acetyl:2H(3))	Acetyl:2H(3)@Any N-term;Acetyl:2H(3)@K	0;3	27	QE	0.0194	VKTQSESGDVSR	0.964296	0.967644	0.837612	0.473676	3	0.970532	0.961328	1	RR	TRUE	trypsin	2	6	4	0.4	0.25
High	[R].kEQLER.[L]	HCD	1.87	0.0012	0.012	0.274	0.21	1	Sequest HT (2)	2	524.804	0.07	50.2135	11539	11539	Q9NPF5	ArgAcetylD3	RKEQLER	7	2	50.214	240	7		N-Term(ArgAcetylD3);K1(Acetyl:2H(3))	Acetyl:2H(3)@Any N-term;Acetyl:2H(3)@K	0;2	27	QE	0.0201273	KEQLER	0.969612	0.969961	0.843567	0.403044	4	0.846906	0.97993	0.333333	RR;FY;VL	TRUE	trypsin	0	8	5	0.384615	0
Low	[R].eDYVGGQSHR.[S]	HCD	1.1	0.43	1	-0.602	0.17	1	Sequest HT (2)	2	674.822	-4.42	50.5386	11682	11682	Q7Z6E9	ArgAcetylD3	REDYVGGQSHR	11	2	50.539	241	11		N-Term(ArgAcetylD3)	Acetyl:2H(3)@Any N-term	0	27	QE	0.0230818	EDYVGGQSHR	0.658538	0.687326	0.482431	-0.13743	3	-0.0361858	0.873082	1	RR	TRUE	trypsin	2	2	8	0.8	0.5
High	[R].dDGLSAAAR.[K]	HCD	2.6	0.00022	0.0011	0.585	0.41	1	Sequest HT (2)	2	538.78	0.16	51.0685	11914	11914	P84101	ArgAcetylD3	RDDGLSAAAR	10	2	51.068	242	10		N-Term(ArgAcetylD3)	Acetyl:2H(3)@Any N-term	0	27	QE	0.0278909	DDGLSAAAR	0.929984	0.941742	0.781624	0.661647	5	0.915486	0.944444	1	RR	TRUE	trypsin	0	9	3	0.25	0
Low	[R].dDGLSAAAR.[K]	HCD	0.88	0.059	0.66	-0.229	0.27	1	Sequest HT (2)	1	1076.55	-0.57	51.2522	11995	11995	P84101	ArgAcetylD3	RDDGLSAAAR	10	1	51.252	243	10		N-Term(ArgAcetylD3)	Acetyl:2H(3)@Any N-term	0	27	QE	0.0295636	DDGLSAAAR	0.411787	0.471922	0.31288	0.199099	2	-0.116321	0.794292	1	RR	TRUE	trypsin	2	2	4	0.666667	0.5
High	[R].eLEkGR.[I]	HCD	1.82	0.0034	0.046	0.134	0.35	1	Sequest HT (2)	2	489.286	0.18	51.3207	12027	12027	Q96LT9	ArgAcetylD3	RELEKGR	7	2	51.321	244	7		N-Term(ArgAcetylD3);K4(Acetyl:2H(3))	Acetyl:2H(3)@Any N-term;Acetyl:2H(3)@K	0;5	27	QE	0.0301909	ELEKGR	0.874048	0.876002	0.679597	0.416957	5	0.550671	0.912258	1	RR	TRUE	trypsin	3	8	2	0.2	0.272727
High	[R].aVSPSNPkAR.[Q]	HCD	3.08	5.5e-05	0.00013	0.985	0.37	1	Sequest HT (2)	2	636.868	-0.66	51.3891	12059	12059	Q14244	ArgAcetylD3	RAVSPSNPKAR	11	2	51.389	245	11		N-Term(ArgAcetylD3);K8(Acetyl:2H(3))	Acetyl:2H(3)@Any N-term;Acetyl:2H(3)@K	0;9	27	QE	0.0308091	AVSPSNPKAR	0.872366	0.891105	0.700137	0.488461	5	0.516364	0.937068	1	RR	TRUE	trypsin	2	8	3	0.272727	0.2
High	[R].qVPVEEAR.[S]	HCD	1.63	0.0017	0.018	0.234	0.11	1	Sequest HT (2)	2	564.813	-0.75	51.6302	12161	12161	P11234	ArgAcetylD3	RQVPVEEAR	9	2	51.63	246	9		N-Term(ArgAcetylD3)	Acetyl:2H(3)@Any N-term	0	27	QE	0.033	QVPVEEAR	0.938549	0.950112	0.798064	0.490286	5	0.530264	0.990452	1	RR	TRUE	trypsin	1	10	4	0.285714	0.0909091
High	[R].sNPDLEkR.[I]	HCD	2.08	0.00018	0.00071	0.661	0.34	1	Sequest HT (2)	2	602.831	-0.93	51.9066	12276	12276	Q13887	ArgAcetylD3	RSNPDLEKR	9	2	51.907	247	9		N-Term(ArgAcetylD3);K7(Acetyl:2H(3))	Acetyl:2H(3)@Any N-term;Acetyl:2H(3)@K	0;8	27	QE	0.0355182	SNPDLEKR	0.952773	0.963329	0.82706	0.363636	4	0.857887	0.982618	1	RR	TRUE	trypsin	2	8	5	0.384615	0.2
High	[R].tLPSTSSSGSkR.[H]	HCD	1.62	0.005	0.068	0.092	0.48	1	Sequest HT (2)	2	727.399	1.87	51.9785	12308	12308	P08651	ArgAcetylD3	RTLPSTSSSGSKR	13	2	51.978	248	13		N-Term(ArgAcetylD3);K11(Acetyl:2H(3))	Acetyl:2H(3)@Any N-term;Acetyl:2H(3)@K	0;12	27	QE	0.0361636	TLPSTSSSGSKR	0.919823	0.926397	0.754222	0.497232	2	0.246024	0.964417	1	RR	TRUE	trypsin	2	4	3	0.428571	0.333333
High	[R].eVEkAkR.[A]	HCD	2.46	0.0018	0.019	0.227	0.46	1	Sequest HT (2)	2	575.847	-1.05	52.1863	12399	12399	P11021	ArgAcetylD3	REVEKAKR	8	2	52.186	249	8		N-Term(ArgAcetylD3);K4(Acetyl:2H(3));K6(Acetyl:2H(3))	Acetyl:2H(3)@Any N-term;Acetyl:2H(3)@K;Acetyl:2H(3)@K	0;5;7	27	QE	0.0380545	EVEKAKR	0.893108	0.912975	0.732442	0.394089	2	0.3067	0.932214	1	RR	TRUE	trypsin	0	7	5	0.416667	0
High	[R].dAPQDFHPDR.[V]	HCD	2.8	0.00018	0.00069	0.667	0.4	1	Sequest HT (2)	3	466.891	0.04	52.3454	12467	12467	P21333	ArgAcetylD3	RDAPQDFHPDR	11	3	52.345	250	11		N-Term(ArgAcetylD3)	Acetyl:2H(3)@Any N-term	0	27	QE	0.0395	DAPQDFHPDR	0.984272	0.986762	0.896299	0.715947	7	0.950398	0.997208	0	IR	TRUE	trypsin	1	15	4	0.210526	0.0625
High	[R].qEEIkkR.[L]	HCD	2.23	0.00085	0.0079	0.324	0.4	1	Sequest HT (2)	2	611.367	0.23	52.4183	12497	12497	O75822	ArgAcetylD3	RQEEIKKR	8	2	52.418	251	8		N-Term(ArgAcetylD3);K5(Acetyl:2H(3));K6(Acetyl:2H(3))	Acetyl:2H(3)@Any N-term;Acetyl:2H(3)@K;Acetyl:2H(3)@K	0;6;7	27	QE	0.0401636	QEEIKKR	0.915228	0.919586	0.742952	0.421456	3	0.37785	0.969961	0.5	ST;KR	TRUE	trypsin	0	9	4	0.307692	0
Medium	[R].sDPGTSGEAYkR.[S]	HCD	1.3	0.045	0.58	-0.196	0.08	1	Sequest HT (2)	2	757.381	1.81	52.453	12511	12511	Q9H300	ArgAcetylD3	RSDPGTSGEAYKR	13	2	52.453	252	13		N-Term(ArgAcetylD3);K11(Acetyl:2H(3))	Acetyl:2H(3)@Any N-term;Acetyl:2H(3)@K	0;12	27	QE	0.0404818	SDPGTSGEAYKR	0.941071	0.944817	0.787521	0.244084	1	0.99434	0.861099	1	RR	TRUE	trypsin	0	4	9	0.692308	0
High	[R].eVEkAkR.[A]	HCD	1.99	0.00032	0.0018	0.509	0.33	1	Sequest HT (2)	2	575.848	-0.09	52.7111	12630	12630	P11021	ArgAcetylD3	REVEKAKR	8	2	52.711	253	8		N-Term(ArgAcetylD3);K4(Acetyl:2H(3));K6(Acetyl:2H(3))	Acetyl:2H(3)@Any N-term;Acetyl:2H(3)@K;Acetyl:2H(3)@K	0;5;7	27	QE	0.0428273	EVEKAKR	0.862207	0.890112	0.698747	0.438971	2	0.472104	0.889114	1	RR	TRUE	trypsin	0	7	5	0.416667	0
High	[R].kTEEAAAANkR.[L]	HCD	4.96	1.3e-05	2.9e-05	1.29	0.62	1	Sequest HT (2)	3	493.945	-0.32	53.147	12815	12815	O95239; Q2VIQ3	ArgAcetylD3	RKTEEAAAANKR	12	3	53.147	254	12		N-Term(ArgAcetylD3);K1(Acetyl:2H(3));K10(Acetyl:2H(3))	Acetyl:2H(3)@Any N-term;Acetyl:2H(3)@K;Acetyl:2H(3)@K	0;2;11	27	QE	0.0467909	KTEEAAAANKR	0.990868	0.992951	0.924365	0.747075	11	0.979147	0.998633	1	RR;RR	TRUE	trypsin	4	18	2	0.1	0.181818
High	[R].kTEEAAAANkR.[L]	HCD	2.09	5.5e-05	0.00012	1.01	0.39	1	Sequest HT (2)	2	740.415	0.83	53.2376	12856	12856	O95239; Q2VIQ3	ArgAcetylD3	RKTEEAAAANKR	12	2	53.238	255	12		N-Term(ArgAcetylD3);K1(Acetyl:2H(3));K10(Acetyl:2H(3))	Acetyl:2H(3)@Any N-term;Acetyl:2H(3)@K;Acetyl:2H(3)@K	0;2;11	27	QE	0.0476182	KTEEAAAANKR	0.934267	0.942351	0.782781	0.545102	5	0.284899	0.977134	1	RR;RR	TRUE	trypsin	1	10	4	0.285714	0.0909091
High	[R].cHLEAkYR.[E]	HCD	3.48	0.0002	0.00084	0.632	0.51	1	Sequest HT (2)	3	441.568	-0.13	53.2443	12859	12859	Q96P48	ArgAcetylD3	RCHLEAKYR	9	3	53.244	256	9		N-Term(ArgAcetylD3);C1(Carbamidomethyl);K6(Acetyl:2H(3))	Acetyl:2H(3)@Any N-term;Carbamidomethyl@C;Acetyl:2H(3)@K	0;2;7	27	QE	0.0476727	CHLEAKYR	0.964371	0.97147	0.847565	0.626833	7	0.977379	0.959566	1	RR	TRUE	trypsin	2	12	2	0.142857	0.142857
High	[R].kQHSLLkR.[L]	HCD	2.57	0.0016	0.016	0.242	0.32	1	Sequest HT (2)	3	434.277	-0.66	53.2487	12861	12861	P62841	ArgAcetylD3	RKQHSLLKR	9	3	53.249	257	9		N-Term(ArgAcetylD3);K1(Acetyl:2H(3));K7(Acetyl:2H(3))	Acetyl:2H(3)@Any N-term;Acetyl:2H(3)@K;Acetyl:2H(3)@K	0;2;8	27	QE	0.0477182	KQHSLLKR	0.906676	0.926669	0.754683	0.620051	5	0.625315	0.998796	1	RR	TRUE	trypsin	1	11	3	0.214286	0.0833333
High	[R].aVQSGHVNLkDR.[L]	HCD	3.39	0.00012	0.00045	0.745	0.56	1	Sequest HT (2)	3	523.962	0.03	55.8536	14039	14039	Q15545	ArgAcetylD3	RAVQSGHVNLKDR	13	3	55.854	258	13		N-Term(ArgAcetylD3);K10(Acetyl:2H(3))	Acetyl:2H(3)@Any N-term;Acetyl:2H(3)@K	0;11	27	QE	0.0714	AVQSGHVNLKDR	0.945076	0.953821	0.805775	0.633142	9	0.99339	0.930137	1	RR	TRUE	trypsin	3	14	2	0.125	0.176471
High	[R].nEkIAVHcTVR.[G]	HCD	4.3	1.3e-05	2e-05	1.35	0.65	1	Sequest HT (2)	3	524.957	0.81	56.2633	14230	14230	P62913	ArgAcetylD3	RNEKIAVHCTVR	12	3	56.263	259	12		N-Term(ArgAcetylD3);K3(Acetyl:2H(3));C8(Carbamidomethyl)	Acetyl:2H(3)@Any N-term;Acetyl:2H(3)@K;Carbamidomethyl@C	0;4;9	27	QE	0.0751182	NEKIAVHCTVR	0.989228	0.992101	0.919933	0.915856	10	0.994627	0.988382	1	RR	TRUE	trypsin	1	20	1	0.047619	0.047619
High	[R].yIkNPR.[I]	HCD	1.7	0.0015	0.015	0.251	0.58	1	Sequest HT (2)	2	518.812	0.47	56.2852	14239	14239	P49368	ArgAcetylD3	RYIKNPR	7	2	56.285	260	7		N-Term(ArgAcetylD3);K3(Acetyl:2H(3))	Acetyl:2H(3)@Any N-term;Acetyl:2H(3)@K	0;4	27	QE	0.0753182	YIKNPR	0.831623	0.87674	0.680573	0.55	3	0.706481	0.87759	1	RR	TRUE	trypsin	1	7	2	0.222222	0.125
High	[R].lPDAHSDYAR.[Y]	HCD	2.71	0.00034	0.0019	0.502	0.57	1	Sequest HT (2)	3	449.227	-1.08	56.5145	14343	14343	Q96PK6	ArgAcetylD3	RLPDAHSDYAR	11	3	56.514	261	11		N-Term(ArgAcetylD3)	Acetyl:2H(3)@Any N-term	0	27	QE	0.0774	LPDAHSDYAR	0.986856	0.988921	0.905149	0.788837	5	0.986001	0.988757	1	RR	TRUE	trypsin	0	13	3	0.1875	0
High	[R].fDSEkAGDREVQR.[T]	HCD	1.39	0.0014	0.014	0.263	0.06	1	Sequest HT (2)	3	594.972	0.71	57.2301	14662	14662	P17980	ArgAcetylD3	RFDSEKAGDREVQR	14	3	57.23	262	14		N-Term(ArgAcetylD3);K5(Acetyl:2H(3))	Acetyl:2H(3)@Any N-term;Acetyl:2H(3)@K	0;6	27	QE	0.0839091	FDSEKAGDREVQR	0.17656	0.277418	0.178957	-0.0507128	2	-0.0148161	0.45079	1	KR	TRUE	trypsin	1	6	13	0.684211	0.142857
High	[R].vkAEAEAAR.[E]	HCD	2.09	0.00096	0.0089	0.311	0.5	1	Sequest HT (2)	2	595.843	1.94	57.3275	14705	14705	Q15149	ArgAcetylD3	RVKAEAEAAR	10	2	57.328	263	10		N-Term(ArgAcetylD3);K2(Acetyl:2H(3))	Acetyl:2H(3)@Any N-term;Acetyl:2H(3)@K	0;3	27	QE	0.0848	VKAEAEAAR	0.967578	0.970346	0.844577	0.692149	4	0.824557	0.981729	0	SR	TRUE	trypsin	0	10	3	0.230769	0
High	[R].qEkWQQEQER.[L]	HCD	3.03	0.00032	0.0018	0.51	0.45	1	Sequest HT (2)	3	545.608	-3.24	57.5108	14788	14788	Q9UPQ0	ArgAcetylD3	RQEKWQQEQER	11	3	57.511	264	11		N-Term(ArgAcetylD3);K3(Acetyl:2H(3))	Acetyl:2H(3)@Any N-term;Acetyl:2H(3)@K	0;4	27	QE	0.0864636	QEKWQQEQER	0.968143	0.974428	0.855719	0.848593	8	0.960138	0.997653	1	RR	TRUE	trypsin	1	14	1	0.0666667	0.0666667
High	[R].qEkWQQEQER.[L]	HCD	3.28	6.5e-05	0.00023	0.874	0.51	1	Sequest HT (2)	2	817.91	-1.56	57.6321	14839	14839	Q9UPQ0	ArgAcetylD3	RQEKWQQEQER	11	2	57.632	265	11		N-Term(ArgAcetylD3);K3(Acetyl:2H(3))	Acetyl:2H(3)@Any N-term;Acetyl:2H(3)@K	0;4	27	QE	0.0875636	QEKWQQEQER	0.912703	0.928589	0.757954	0.413133	5	0.753901	0.941015	1	RR	TRUE	trypsin	2	10	5	0.333333	0.166667
High	[R].tEEGPTLSYGRDGR.[S]	HCD	2.62	0.00012	0.00046	0.741	0.26	1	Sequest HT (2)	3	580.29	0.76	57.7238	14879	14879	P43243	ArgAcetylD3	RTEEGPTLSYGRDGR	15	3	57.724	266	15		N-Term(ArgAcetylD3)	Acetyl:2H(3)@Any N-term	0	27	QE	0.0884	TEEGPTLSYGRDGR	0.9426	0.950624	0.79911	0.351094	6	0.908311	0.968831	1	RR	TRUE	trypsin	2	11	8	0.421053	0.153846
High	[R].qSIAkEkEER.[L]	HCD	4.08	1.3e-05	1.7e-05	1.38	0.55	1	Sequest HT (2)	2	754.922	-1.2	58.5043	15219	15219	Q8NFC6	ArgAcetylD3	RQSIAKEKEER	11	2	58.504	267	11		N-Term(ArgAcetylD3);K5(Acetyl:2H(3));K7(Acetyl:2H(3))	Acetyl:2H(3)@Any N-term;Acetyl:2H(3)@K;Acetyl:2H(3)@K	0;6;8	27	QE	0.0954909	QSIAKEKEER	0.923821	0.940619	0.779508	0.626266	7	0.59796	0.97634	1	RR	TRUE	trypsin	2	13	2	0.133333	0.133333
High	[R].ikIESNR.[A]	HCD	2	0.0002	0.0009	0.62	0.36	1	Sequest HT (2)	2	553.334	0.39	59.1292	15502	15502	Q8TF01	ArgAcetylD3	RIKIESNR	8	2	59.129	268	8		N-Term(ArgAcetylD3);K2(Acetyl:2H(3))	Acetyl:2H(3)@Any N-term;Acetyl:2H(3)@K	0;3	27	QE	0.101173	IKIESNR	0.918466	0.936406	0.771739	0.616585	5	0.665323	0.951832	1	RR	TRUE	trypsin	1	9	2	0.181818	0.1
High	[R].gERPDYkGEEELR.[L]	HCD	2.68	0.0076	0.11	0.038	0.46	1	Sequest HT (2)	4	456.737	5.11	60.1908	15956	15956	Q9UQ35	ArgAcetylD3	RGERPDYKGEEELR	14	4	60.191	269	14		N-Term(ArgAcetylD3);K7(Acetyl:2H(3))	Acetyl:2H(3)@Any N-term;Acetyl:2H(3)@K	0;8	27	QE	0.110827	GERPDYKGEEELR	0.637057	0.690286	0.485031	0.388628	5	0.380762	0.850011	1	RR	TRUE	trypsin	2	9	6	0.4	0.181818
High	[R].lSYNTASNkTR.[L]	HCD	2.96	0.00011	0.00038	0.778	0.45	1	Sequest HT (2)	2	750.906	0.6	60.1927	15957	15957	P49207	ArgAcetylD3	RLSYNTASNKTR	12	2	60.193	270	12		N-Term(ArgAcetylD3);K9(Acetyl:2H(3))	Acetyl:2H(3)@Any N-term;Acetyl:2H(3)@K	0;10	27	QE	0.110845	LSYNTASNKTR	0.882734	0.894677	0.705188	0.47463	1	-0.0582919	0.934443	1	RR	TRUE	trypsin	1	6	4	0.4	0.142857
High	[R].gERPDYkGEEELR.[L]	HCD	3.73	0.00033	0.0019	0.504	0.43	1	Sequest HT (2)	3	608.643	0.09	60.2641	15985	15985	Q9UQ35	ArgAcetylD3	RGERPDYKGEEELR	14	3	60.264	271	14		N-Term(ArgAcetylD3);K7(Acetyl:2H(3))	Acetyl:2H(3)@Any N-term;Acetyl:2H(3)@K	0;8	27	QE	0.111491	GERPDYKGEEELR	0.597404	0.663422	0.461793	0.420174	9	0.378722	0.958648	1	RR	TRUE	trypsin	3	14	5	0.263158	0.176471
High	[R].lSYNTASNkTR.[L]	HCD	3.99	8.3e-05	0.0003	0.823	0.48	1	Sequest HT (2)	3	500.939	-0.12	60.3306	16011	16011	P49207	ArgAcetylD3	RLSYNTASNKTR	12	3	60.331	272	12		N-Term(ArgAcetylD3);K9(Acetyl:2H(3))	Acetyl:2H(3)@Any N-term;Acetyl:2H(3)@K	0;10	27	QE	0.1121	LSYNTASNKTR	0.993775	0.994811	0.935119	0.684144	9	0.980974	0.997496	1	RR	TRUE	trypsin	4	13	1	0.0714286	0.235294
High	[R].kESSTPEEFSR.[L]	HCD	2.85	5.5e-05	0.00013	0.995	0.6	1	Sequest HT (2)	2	771.886	-1.35	60.458	16067	16067	O14578	ArgAcetylD3	RKESSTPEEFSR	12	2	60.458	273	12		N-Term(ArgAcetylD3);K1(Acetyl:2H(3))	Acetyl:2H(3)@Any N-term;Acetyl:2H(3)@K	0;2	27	QE	0.113255	KESSTPEEFSR	0.923892	0.939927	0.778214	0.675335	4	0.795256	0.958672	1	RR	TRUE	trypsin	1	10	3	0.230769	0.0909091
High	[R].aGAGDFMR.[Y]	HCD	2.25	0.0013	0.013	0.27	0.39	1	Sequest HT (2)	2	513.255	0.43	60.9413	16271	16271	Q96AY3	ArgAcetylD3	RAGAGDFMR	9	2	60.941	274	9		N-Term(ArgAcetylD3)	Acetyl:2H(3)@Any N-term	0	27	QE	0.117645	AGAGDFMR	0.934575	0.945263	0.78839	0.604655	3	0.937217	0.940424	1	RR	TRUE	trypsin	1	9	2	0.181818	0.1
High	[R].lkDQDQDEDEEEkEkRGR.[K]	HCD	3.7	1.3e-05	8.1e-06	1.53	0.74	1	Sequest HT (2)	3	861.761	0.74	61.7291	16602	16602	P35269	ArgAcetylD3	RLKDQDQDEDEEEKEKRGR	19	3	61.729	275	19		N-Term(ArgAcetylD3);K2(Acetyl:2H(3));K13(Acetyl:2H(3));K15(Acetyl:2H(3))	Acetyl:2H(3)@Any N-term;Acetyl:2H(3)@K;Acetyl:2H(3)@K;Acetyl:2H(3)@K	0;3;14;16	27	QE	0.124809	LKDQDQDEDEEEKEKRGR	0.869431	0.889223	0.697508	0.363802	3	0.806092	0.919737	1	RR	TRUE	trypsin	1	12	12	0.5	0.0769231
High	[R].eEEGLQLR.[K]	HCD	2.45	8.3e-05	0.00028	0.837	0	1	Sequest HT (2)	2	587.816	0.04	62.1083	16760	16760	P52294	ArgAcetylD3	REEEGLQLR	9	2	62.108	276	9		N-Term(ArgAcetylD3)	Acetyl:2H(3)@Any N-term	0	27	QE	0.128255	EEEGLQLR	0.950246	0.959927	0.819166	0.651943	5	0.818469	0.967492	1	RR	TRUE	trypsin	0	11	3	0.214286	0
High	[R].aGAGDFMR.[Y]	HCD	2.22	0.0024	0.029	0.183	0.48	1	Sequest HT (2)	2	513.256	1.6	62.1312	16771	16771	Q96AY3	ArgAcetylD3	RAGAGDFMR	9	2	62.131	277	9		N-Term(ArgAcetylD3)	Acetyl:2H(3)@Any N-term	0	27	QE	0.128464	AGAGDFMR	0.931499	0.938905	0.776316	-0.0185118	6	0.919076	0.95916	1	RR	TRUE	trypsin	6	7	4	0.363636	0.461538
High	[R].kDDEVQVVR.[G]	HCD	2.61	0.00012	0.00049	0.731	0.54	1	Sequest HT (2)	2	667.37	-1	62.2166	16807	16807	Q9UNX3; P61254	ArgAcetylD3	RKDDEVQVVR	10	2	62.217	278	10		N-Term(ArgAcetylD3);K1(Acetyl:2H(3))	Acetyl:2H(3)@Any N-term;Acetyl:2H(3)@K	0;2	27	QE	0.129245	KDDEVQVVR	0.951452	0.944931	0.787742	0.641184	6	0.878894	0.972923	0	IR;IR	TRUE	trypsin	0	11	5	0.3125	0
High	[R].aQLPkYQR.[N]	HCD	2.95	0.00035	0.0023	0.477	0.55	1	Sequest HT (2)	2	625.367	-1.07	62.5107	16931	16931	O43670	ArgAcetylD3	RAQLPKYQR	9	2	62.511	279	9		N-Term(ArgAcetylD3);K5(Acetyl:2H(3))	Acetyl:2H(3)@Any N-term;Acetyl:2H(3)@K	0;6	27	QE	0.131918	AQLPKYQR	0.935821	0.946853	0.791515	0.515213	6	0.575714	0.972422	1	RR	TRUE	trypsin	1	10	3	0.230769	0.0909091
High	[R].kSLLTR.[K]	HCD	2.19	0.0021	0.025	0.199	0.11	1	Sequest HT (2)	2	482.314	-0.39	62.5122	16932	16932	Q9H4A6	ArgAcetylD3	RKSLLTR	7	2	62.512	280	7		N-Term(ArgAcetylD3);K1(Acetyl:2H(3))	Acetyl:2H(3)@Any N-term;Acetyl:2H(3)@K	0;2	27	QE	0.131927	KSLLTR	0.969627	0.973458	0.852998	0.65087	3	0.772948	0.979838	0.333333	YH;RR;GF	TRUE	trypsin	0	8	2	0.2	0
High	[R].qPkTPLEkR.[D]	HCD	2.13	0.00052	0.0044	0.393	0.12	1	Sequest HT (2)	2	694.422	0.39	62.6038	16973	16973	P46013	ArgAcetylD3	RQPKTPLEKR	10	2	62.604	281	10		N-Term(ArgAcetylD3);K3(Acetyl:2H(3));K8(Acetyl:2H(3))	Acetyl:2H(3)@Any N-term;Acetyl:2H(3)@K;Acetyl:2H(3)@K	0;4;9	27	QE	0.132764	QPKTPLEKR	0.862126	0.888608	0.696653	0.46332	5	0.162134	0.983517	1	RR	TRUE	trypsin	2	9	3	0.25	0.181818
High	[R].qPkTPLEkR.[D]	HCD	2.66	0.00044	0.0029	0.443	0.34	1	Sequest HT (2)	3	463.283	-1.38	62.6653	17001	17001	P46013	ArgAcetylD3	RQPKTPLEKR	10	3	62.665	282	10		N-Term(ArgAcetylD3);K3(Acetyl:2H(3));K8(Acetyl:2H(3))	Acetyl:2H(3)@Any N-term;Acetyl:2H(3)@K;Acetyl:2H(3)@K	0;4;9	27	QE	0.133318	QPKTPLEKR	0.970578	0.977238	0.86391	0.899356	6	0.838124	0.98493	1	RR	TRUE	trypsin	0	13	1	0.0714286	0
High	[R].cESkkFGGPGAR.[A]	HCD	1.95	0.00026	0.0014	0.55	0.46	1	Sequest HT (2)	2	792.917	0.81	62.7713	17047	17047	P62249	ArgAcetylD3	RCESKKFGGPGAR	13	2	62.771	283	13		N-Term(ArgAcetylD3);C1(Carbamidomethyl);K4(Acetyl:2H(3));K5(Acetyl:2H(3))	Acetyl:2H(3)@Any N-term;Carbamidomethyl@C;Acetyl:2H(3)@K;Acetyl:2H(3)@K	0;2;5;6	27	QE	0.134282	CESKKFGGPGAR	0.912649	0.918783	0.741653	0.533489	2	0.655805	0.957512	1	RR	TRUE	trypsin	0	8	6	0.428571	0
High	[R].lRENQVLSVR.[I]	HCD	3.57	5.5e-05	0.00013	0.996	0.39	1	Sequest HT (2)	3	472.282	0.67	62.8933	17102	17102	Q10589	ArgAcetylD3	RLRENQVLSVR	11	3	62.893	284	11		N-Term(ArgAcetylD3)	Acetyl:2H(3)@Any N-term	0	27	QE	0.135391	LRENQVLSVR	0.580068	0.645796	0.446948	0.401032	7	0.914743	0.536885	NA	NA	FALSE	trypsin	3	11	4	0.266667	0.214286
High	[R].vGFVGAGR.[M]	HCD	1.94	0.00045	0.003	0.439	0.32	1	Sequest HT (2)	2	482.282	-0.06	63.0148	17153	17153	Q53H96	ArgAcetylD3	RVGFVGAGR	9	2	63.015	285	9		N-Term(ArgAcetylD3)	Acetyl:2H(3)@Any N-term	0	27	QE	0.1365	VGFVGAGR	0.868365	0.886035	0.693102	0.407258	3	0.159194	0.941669	1	RR	TRUE	trypsin	0	7	5	0.416667	0
High	[R].aFSEGQITR.[M]	HCD	1.8	0.0011	0.011	0.29	0.33	1	Sequest HT (2)	2	605.324	0.15	63.0574	17172	17172	Q96GN5	ArgAcetylD3	RAFSEGQITR	10	2	63.057	286	10		N-Term(ArgAcetylD3)	Acetyl:2H(3)@Any N-term	0	27	QE	0.136882	AFSEGQITR	0.932519	0.931413	0.762846	0.393179	3	0.614819	0.962723	1	RR	TRUE	trypsin	0	7	6	0.461538	0
High	[R].lDDEIGR.[K]	HCD	1.53	0.00057	0.0048	0.383	0.27	1	Sequest HT (2)	2	509.771	-0.78	63.084	17183	17183	Q96DN5	ArgAcetylD3	RLDDEIGR	8	2	63.084	287	8		N-Term(ArgAcetylD3)	Acetyl:2H(3)@Any N-term	0	27	QE	0.137127	LDDEIGR	0.913995	0.927687	0.756412	0.485495	5	0.836338	0.952354	1	RR	TRUE	trypsin	3	10	3	0.230769	0.230769
High	[R].kGPEADSEWR.[G]	HCD	2.78	7.2e-05	0.00024	0.864	0.6	1	Sequest HT (2)	2	710.858	0.59	63.3728	17310	17310	Q14152	ArgAcetylD3	RKGPEADSEWR	11	2	63.373	288	11		N-Term(ArgAcetylD3);K1(Acetyl:2H(3))	Acetyl:2H(3)@Any N-term;Acetyl:2H(3)@K	0;2	27	QE	0.139755	KGPEADSEWR	0.987608	0.989506	0.907689	0.689869	5	0.963508	0.995052	0	WR	TRUE	trypsin	0	11	4	0.266667	0
High	[R].vVSEGGkPkVR.[V]	HCD	2.56	0.00026	0.0014	0.55	0.55	1	Sequest HT (2)	3	482.961	-3.07	63.7379	17461	17461	P17066	ArgAcetylD3	RVVSEGGKPKVR	12	3	63.738	289	12		N-Term(ArgAcetylD3);K7(Acetyl:2H(3));K9(Acetyl:2H(3))	Acetyl:2H(3)@Any N-term;Acetyl:2H(3)@K;Acetyl:2H(3)@K	0;8;10	27	QE	0.143073	VVSEGGKPKVR	0.990117	0.99052	0.912273	0.748978	6	0.932109	0.99418	0	FQ;FR	TRUE	trypsin	0	13	4	0.235294	0
High	[R].vIGSGcNLDSAR.[F]	HCD	2.83	5e-05	0.00011	1.03	0.48	1	Sequest HT (2)	2	725.367	-2.37	63.7543	17469	17469	Q6ZMR3; P00338; P07195; P07864	ArgAcetylD3	RVIGSGCNLDSAR	13	2	63.754	290	13		N-Term(ArgAcetylD3);C6(Carbamidomethyl)	Acetyl:2H(3)@Any N-term;Carbamidomethyl@C	0;7	27	QE	0.143218	VIGSGCNLDSAR	0.960046	0.964187	0.829109	0.723893	4	0.882304	0.980339	0	HR;NR;TR;NR	TRUE	trypsin	1	9	2	0.181818	0.1
High	[R].sPNEEYVEVGR.[L]	HCD	3.4	1.3e-05	2.6e-06	1.74	0.45	1	Sequest HT (2)	2	740.366	-1.82	63.906	17539	17539	P31321	ArgAcetylD3	RSPNEEYVEVGR	12	2	63.906	291	12		N-Term(ArgAcetylD3)	Acetyl:2H(3)@Any N-term	0	27	QE	0.1446	SPNEEYVEVGR	0.910331	0.922157	0.74715	0.532558	4	0.724353	0.961496	1	RR	TRUE	trypsin	0	12	6	0.333333	0
High	[R].ekEMLER.[L]	HCD	2.51	0.00057	0.0048	0.381	0.35	1	Sequest HT (2)	2	590.816	-0.99	64.1505	17649	17649	Q9UIG0	ArgAcetylD3	REKEMLER	8	2	64.15	292	8		N-Term(ArgAcetylD3);K2(Acetyl:2H(3))	Acetyl:2H(3)@Any N-term;Acetyl:2H(3)@K	0;3	27	QE	0.146818	EKEMLER	0.976911	0.979655	0.871364	0.554735	5	0.830474	0.98928	1	RR	TRUE	trypsin	1	9	3	0.25	0.1
High	[R].qAVDVSPLR.[V]	HCD	2.29	0.00025	0.0013	0.557	0.45	1	Sequest HT (2)	2	593.343	0.66	64.2447	17692	17692	P46782	ArgAcetylD3	RQAVDVSPLR	10	2	64.245	293	10		N-Term(ArgAcetylD3)	Acetyl:2H(3)@Any N-term	0	27	QE	0.147682	QAVDVSPLR	0.957386	0.963189	0.82673	0.634363	5	0.889579	0.98506	1	RR	TRUE	trypsin	1	11	2	0.153846	0.0833333
High	[R].mQNDTAENETTEkEEkSESR.[Q]	HCD	5.32	1.3e-05	1.3e-07	2.31	0.8	1	Sequest HT (2)	3	883.075	0.54	64.5788	17839	17839	Q05682	ArgAcetylD3	RMQNDTAENETTEKEEKSESR	21	3	64.579	294	21		N-Term(ArgAcetylD3);K13(Acetyl:2H(3));K16(Acetyl:2H(3))	Acetyl:2H(3)@Any N-term;Acetyl:2H(3)@K;Acetyl:2H(3)@K	0;14;17	27	QE	0.150718	MQNDTAENETTEKEEKSESR	0.989338	0.991593	0.91739	0.821308	13	0.975368	0.995113	1	RR	TRUE	trypsin	1	25	4	0.137931	0.0384615
High	[R].mQNDTAENETTEkEEkSESR.[Q]	HCD	2.64	0.00034	0.0021	0.487	0.73	1	Sequest HT (2)	2	1324.11	1.89	64.6773	17881	17881	Q05682	ArgAcetylD3	RMQNDTAENETTEKEEKSESR	21	2	64.677	295	21		N-Term(ArgAcetylD3);K13(Acetyl:2H(3));K16(Acetyl:2H(3))	Acetyl:2H(3)@Any N-term;Acetyl:2H(3)@K;Acetyl:2H(3)@K	0;14;17	27	QE	0.151609	MQNDTAENETTEKEEKSESR	0.991922	0.992579	0.922393	0.943706	5	0.991071	0.995725	1	RR	TRUE	trypsin	0	12	1	0.0769231	0
High	[R].nAEQYkDQADkASTR.[L]	HCD	4.39	2.3e-05	5.5e-05	1.16	0.64	1	Sequest HT (2)	3	672.676	2.7	64.8872	17975	17975	P35579	ArgAcetylD3	RNAEQYKDQADKASTR	16	3	64.887	296	16		N-Term(ArgAcetylD3);K6(Acetyl:2H(3));K11(Acetyl:2H(3))	Acetyl:2H(3)@Any N-term;Acetyl:2H(3)@K;Acetyl:2H(3)@K	0;7;12	27	QE	0.153518	NAEQYKDQADKASTR	0.994248	0.995497	0.939564	0.95032	8	0.996936	0.995033	1	RR	TRUE	trypsin	0	19	1	0.05	0
High	[R].amTkDNNLLGR.[F]	HCD	2.27	0.00082	0.0074	0.33	0.5	1	Sequest HT (2)	2	747.902	0.5	64.9151	17989	17989	P0DMV9; P17066; P34931	ArgAcetylD3	RAMTKDNNLLGR	12	2	64.915	297	12		N-Term(ArgAcetylD3);M2(Oxidation);K4(Acetyl:2H(3))	Acetyl:2H(3)@Any N-term;Oxidation@M;Acetyl:2H(3)@K	0;3;5	27	QE	0.153773	AMTKDNNLLGR	0.966304	0.970631	0.84533	0.72234	2	0.540327	0.986926	0	ER;ER;ER;ER	TRUE	trypsin	1	8	2	0.2	0.111111
High	[R].kYkTIESETVR.[T]	HCD	3.96	0.00046	0.0032	0.432	0.64	1	Sequest HT (2)	3	548.98	-0.33	64.9498	18005	18005	O43615	ArgAcetylD3	RKYKTIESETVR	12	3	64.95	298	12		N-Term(ArgAcetylD3);K1(Acetyl:2H(3));K3(Acetyl:2H(3))	Acetyl:2H(3)@Any N-term;Acetyl:2H(3)@K;Acetyl:2H(3)@K	0;2;4	27	QE	0.154091	KYKTIESETVR	0.982997	0.985685	0.892152	0.719732	6	0.964824	0.985674	1	RR	TRUE	trypsin	1	13	3	0.1875	0.0714286
High	[R].nAEQYkDQADkASTR.[L]	HCD	3.82	1.3e-05	8.2e-07	1.96	0.57	1	Sequest HT (2)	2	1008.51	4.19	64.9524	18006	18006	P35579	ArgAcetylD3	RNAEQYKDQADKASTR	16	2	64.952	299	16		N-Term(ArgAcetylD3);K6(Acetyl:2H(3));K11(Acetyl:2H(3))	Acetyl:2H(3)@Any N-term;Acetyl:2H(3)@K;Acetyl:2H(3)@K	0;7;12	27	QE	0.154109	NAEQYKDQADKASTR	0.988927	0.989432	0.907364	0.562045	4	0.993947	0.987532	1	RR	TRUE	trypsin	5	10	2	0.166667	0.333333
High	[R].kQQTLEAEEAkR.[L]	HCD	4.34	5.8e-05	0.00019	0.919	0.59	1	Sequest HT (2)	3	574.654	-0.49	64.9673	18012	18012	Q16643	ArgAcetylD3	RKQQTLEAEEAKR	13	3	64.967	300	13		N-Term(ArgAcetylD3);K1(Acetyl:2H(3));K11(Acetyl:2H(3))	Acetyl:2H(3)@Any N-term;Acetyl:2H(3)@K;Acetyl:2H(3)@K	0;2;12	27	QE	0.154245	KQQTLEAEEAKR	0.984952	0.988949	0.905267	0.905829	10	0.963626	0.991604	1	RR	TRUE	trypsin	0	18	2	0.1	0
High	[R].gESLDNLDSPR.[S]	HCD	2.66	0.00021	0.00096	0.61	0.39	1	Sequest HT (2)	2	702.352	1.09	65.2743	18148	18148	Q8WWI1	ArgAcetylD3	RGESLDNLDSPR	12	2	65.274	301	12		N-Term(ArgAcetylD3)	Acetyl:2H(3)@Any N-term	0	27	QE	0.157036	GESLDNLDSPR	0.730323	0.769933	0.559421	0.586469	5	0.714502	0.911606	1	RR	TRUE	trypsin	1	11	4	0.266667	0.0833333
High	[R].aFEDEkkAR.[M]	HCD	1.83	0.0003	0.0017	0.52	0.37	1	Sequest HT (2)	2	692.879	-1.23	65.3074	18162	18162	Q9UQ80	ArgAcetylD3	RAFEDEKKAR	10	2	65.307	302	10		N-Term(ArgAcetylD3);K6(Acetyl:2H(3));K7(Acetyl:2H(3))	Acetyl:2H(3)@Any N-term;Acetyl:2H(3)@K;Acetyl:2H(3)@K	0;7;8	27	QE	0.157336	AFEDEKKAR	0.87817	0.888278	0.696197	0.464093	3	0.861516	0.902375	0	LR	TRUE	trypsin	1	11	5	0.3125	0.0833333
High	[R].dAkkLVR.[S]	HCD	2.18	0.0014	0.014	0.259	0.47	1	Sequest HT (2)	2	560.861	0.1	65.3275	18170	18170	Q9BQ24	ArgAcetylD3	RDAKKLVR	8	2	65.328	303	8		N-Term(ArgAcetylD3);K3(Acetyl:2H(3));K4(Acetyl:2H(3))	Acetyl:2H(3)@Any N-term;Acetyl:2H(3)@K;Acetyl:2H(3)@K	0;4;5	27	QE	0.157527	DAKKLVR	0.925996	0.939534	0.777483	0.557471	5	0.777164	0.933595	1	RR	TRUE	trypsin	0	11	3	0.214286	0
High	[R].aAPGAEFAPNkR.[Y]	HCD	3.46	2.3e-05	5e-05	1.18	0.53	1	Sequest HT (2)	2	737.905	-0.04	65.6854	18334	18334	Q15233	ArgAcetylD3	RAAPGAEFAPNKR	13	2	65.685	304	13		N-Term(ArgAcetylD3);K11(Acetyl:2H(3))	Acetyl:2H(3)@Any N-term;Acetyl:2H(3)@K	0;12	27	QE	0.160773	AAPGAEFAPNKR	0.903542	0.918963	0.741945	0.307751	8	0.649518	0.949764	0	NR	TRUE	trypsin	7	12	3	0.2	0.368421
High	[R].vAAMSVAkR.[V]	HCD	2.97	1.3e-05	4e-05	1.22	0.47	1	Sequest HT (2)	2	589.851	-0.03	65.9988	18471	18471	Q14562; Q92620	ArgAcetylD3	RVAAMSVAKR	10	2	65.999	305	10		N-Term(ArgAcetylD3);K8(Acetyl:2H(3))	Acetyl:2H(3)@Any N-term;Acetyl:2H(3)@K	0;9	27	QE	0.163627	VAAMSVAKR	0.930874	0.937405	0.773557	0.539511	4	0.430383	0.969298	1	RR;RR	TRUE	trypsin	2	9	2	0.181818	0.181818
High	[R].kSPENTEGkDGSkVTkQEPTR.[S]	HCD	6.99	1.3e-05	5.3e-07	2.04	0.78	1	Sequest HT (2)	3	899.814	0.4	66.0738	18502	18502	Q15651	ArgAcetylD3	RKSPENTEGKDGSKVTKQEPTR	22	3	66.074	306	22		N-Term(ArgAcetylD3);K1(Acetyl:2H(3));K9(Acetyl:2H(3));K13(Acetyl:2H(3));K16(Acetyl:2H(3))	Acetyl:2H(3)@Any N-term;Acetyl:2H(3)@K;Acetyl:2H(3)@K;Acetyl:2H(3)@K;Acetyl:2H(3)@K	0;2;10;14;17	27	QE	0.164309	KSPENTEGKDGSKVTKQEPTR	0.990135	0.991745	0.918141	0.733978	15	0.967879	0.994188	1	KR	TRUE	trypsin	3	25	5	0.166667	0.107143
High	[R].yNIPHGPVVGSTR.[L]	HCD	4.59	1.3e-05	5.8e-06	1.59	0.63	1	Sequest HT (2)	3	533.293	-0.09	66.2028	18560	18560	P50402	ArgAcetylD3	RYNIPHGPVVGSTR	14	3	66.203	307	14		N-Term(ArgAcetylD3)	Acetyl:2H(3)@Any N-term	0	27	QE	0.165482	YNIPHGPVVGSTR	0.987323	0.989609	0.908145	0.696576	9	0.994555	0.982885	1	RR	TRUE	trypsin	3	18	3	0.142857	0.142857
High	[R].iALkkQR.[T]	HCD	3.34	0.00047	0.0035	0.421	0.47	1	Sequest HT (2)	2	574.385	0.94	66.5455	18717	18717	P62753	ArgAcetylD3	RIALKKQR	8	2	66.546	308	8		N-Term(ArgAcetylD3);K4(Acetyl:2H(3));K5(Acetyl:2H(3))	Acetyl:2H(3)@Any N-term;Acetyl:2H(3)@K;Acetyl:2H(3)@K	0;5;6	27	QE	0.1686	IALKKQR	0.88267	0.903897	0.718613	0.484401	6	0.249574	0.954691	1	RR	TRUE	trypsin	2	10	2	0.166667	0.166667
High	[R].aVSkkkTALGkNHSR.[K]	HCD	6.11	1.3e-05	9.2e-08	2.37	0.64	1	Sequest HT (2)	3	669.407	-0.83	67.2643	19035	19035	Q14684	ArgAcetylD3	RAVSKKKTALGKNHSR	16	3	67.264	309	16		N-Term(ArgAcetylD3);K4(Acetyl:2H(3));K5(Acetyl:2H(3));K6(Acetyl:2H(3));K11(Acetyl:2H(3))	Acetyl:2H(3)@Any N-term;Acetyl:2H(3)@K;Acetyl:2H(3)@K;Acetyl:2H(3)@K;Acetyl:2H(3)@K	0;5;6;7;12	27	QE	0.175127	AVSKKKTALGKNHSR	0.951415	0.962031	0.824008	0.501473	12	0.704123	0.992212	1	RR	TRUE	trypsin	8	24	4	0.142857	0.25
High	[R].aEAkkWQNTPR.[V]	HCD	3.68	1.3e-05	6.5e-06	1.57	0.51	1	Sequest HT (2)	2	810.453	1.6	68.332	19527	19527	Q9BVL2	ArgAcetylD3	RAEAKKWQNTPR	12	2	68.332	310	12		N-Term(ArgAcetylD3);K4(Acetyl:2H(3));K5(Acetyl:2H(3))	Acetyl:2H(3)@Any N-term;Acetyl:2H(3)@K;Acetyl:2H(3)@K	0;5;6	27	QE	0.184836	AEAKKWQNTPR	0.840886	0.88504	0.691739	0.61797	8	0.681537	0.878295	1	RR	TRUE	trypsin	3	14	2	0.125	0.176471
High	[R].aEEQMLkER.[E]	HCD	4.03	5.5e-05	0.00011	1.02	0.48	1	Sequest HT (2)	2	690.367	4.13	68.3376	19530	19530	Q14152	ArgAcetylD3	RAEEQMLKER	10	2	68.338	311	10		N-Term(ArgAcetylD3);K7(Acetyl:2H(3))	Acetyl:2H(3)@Any N-term;Acetyl:2H(3)@K	0;8	27	QE	0.184891	AEEQMLKER	0.935091	0.949191	0.796192	0.697426	7	0.70039	0.960156	1	RR	TRUE	trypsin	0	15	2	0.117647	0
High	[R].aEAkkWQNTPR.[V]	HCD	3.49	0.0001	0.00034	0.799	0.58	1	Sequest HT (2)	3	540.637	0.5	68.3925	19553	19553	Q9BVL2	ArgAcetylD3	RAEAKKWQNTPR	12	3	68.392	312	12		N-Term(ArgAcetylD3);K4(Acetyl:2H(3));K5(Acetyl:2H(3))	Acetyl:2H(3)@Any N-term;Acetyl:2H(3)@K;Acetyl:2H(3)@K	0;5;6	27	QE	0.185382	AEAKKWQNTPR	0.973914	0.979352	0.870406	0.753136	9	0.954913	0.979264	1	RR	TRUE	trypsin	3	14	1	0.0666667	0.176471
High	[R].aLAAPAAEEkEEAR.[E]	HCD	4.65	1.3e-05	9.8e-07	1.93	0.58	1	Sequest HT (2)	2	851.456	1.12	68.7545	19722	19722	Q01650	ArgAcetylD3	RALAAPAAEEKEEAR	15	2	68.754	313	15		N-Term(ArgAcetylD3);K10(Acetyl:2H(3))	Acetyl:2H(3)@Any N-term;Acetyl:2H(3)@K	0;11	27	QE	0.188673	ALAAPAAEEKEEAR	0.911914	0.928261	0.757393	0.583629	6	0.826358	0.930782	1	RR	TRUE	trypsin	2	12	4	0.25	0.142857
High	[R].aLAAPAAEEkEEAR.[E]	HCD	4.36	5.5e-05	0.00014	0.975	0.56	1	Sequest HT (2)	3	567.973	1.15	68.982	19822	19822	Q01650	ArgAcetylD3	RALAAPAAEEKEEAR	15	3	68.982	314	15		N-Term(ArgAcetylD3);K10(Acetyl:2H(3))	Acetyl:2H(3)@Any N-term;Acetyl:2H(3)@K	0;11	27	QE	0.190745	ALAAPAAEEKEEAR	0.992665	0.99389	0.929587	0.853042	8	0.992923	0.993985	1	RR	TRUE	trypsin	0	18	3	0.142857	0
High	[R].yQkSTELLIR.[K]	HCD	3.34	0.0002	0.00084	0.632	0.65	1	Sequest HT (2)	3	499.628	-0.83	69.232	19931	19931	P68431; Q16695; Q5TEC6; Q6NXT2; P84243; Q71DI3	ArgAcetylD3	RYQKSTELLIR	11	3	69.232	315	11		N-Term(ArgAcetylD3);K3(Acetyl:2H(3))	Acetyl:2H(3)@Any N-term;Acetyl:2H(3)@K	0;4	27	QE	0.193018	YQKSTELLIR	0.983957	0.987987	0.901223	0.80075	8	0.929378	0.997129	1	RR;RR;RR;RR;RR;RR	TRUE	trypsin	1	14	2	0.125	0.0666667
High	[R].aLAAPAAEEkEEAR.[E]	HCD	2.02	0.00023	0.0012	0.573	0.4	1	Sequest HT (2)	2	851.457	2	69.2811	19950	19950	Q01650	ArgAcetylD3	RALAAPAAEEKEEAR	15	2	69.281	316	15		N-Term(ArgAcetylD3);K10(Acetyl:2H(3))	Acetyl:2H(3)@Any N-term;Acetyl:2H(3)@K	0;11	27	QE	0.193464	ALAAPAAEEKEEAR	0.892039	0.908585	0.725673	0.315448	4	0.651395	0.929207	1	RR	TRUE	trypsin	3	9	7	0.4375	0.25
High	[R].lEEQAAQHkADIEER.[L]	HCD	6.24	1.3e-05	4.4e-08	2.51	0.63	1	Sequest HT (2)	3	671.68	-1.06	70.4349	20447	20447	Q15149	ArgAcetylD3	RLEEQAAQHKADIEER	16	3	70.435	317	16		N-Term(ArgAcetylD3);K9(Acetyl:2H(3))	Acetyl:2H(3)@Any N-term;Acetyl:2H(3)@K	0;10	27	QE	0.203955	LEEQAAQHKADIEER	0.988823	0.991876	0.918795	0.806613	17	0.987794	0.989594	1	RR	TRUE	trypsin	6	26	1	0.037037	0.1875
High	[R].kRkEEEVQQQkLAEER.[Q]	HCD	5.19	1.3e-05	1.1e-06	1.9	0.56	1	Sequest HT (2)	3	788.772	0.36	70.8515	20629	20629	Q96CS3	ArgAcetylD3	RKRKEEEVQQQKLAEER	17	3	70.852	318	17		N-Term(ArgAcetylD3);K1(Acetyl:2H(3));K3(Acetyl:2H(3));K11(Acetyl:2H(3))	Acetyl:2H(3)@Any N-term;Acetyl:2H(3)@K;Acetyl:2H(3)@K;Acetyl:2H(3)@K	0;2;4;12	27	QE	0.207745	KRKEEEVQQQKLAEER	0.945188	0.955206	0.808732	0.773512	8	0.972821	0.942229	NA	NA	FALSE	trypsin	1	16	3	0.157895	0.0588235
High	[R].aASAATAAPTATPAAQESGTIPkkR.[Q]	HCD	5.65	1.3e-05	3.5e-05	1.25	0.71	1	Sequest HT (2)	4	665.367	-1.67	72.305	21249	21249	O00116	ArgAcetylD3	RAASAATAAPTATPAAQESGTIPKKR	26	4	72.305	319	26		N-Term(ArgAcetylD3);K23(Acetyl:2H(3));K24(Acetyl:2H(3))	Acetyl:2H(3)@Any N-term;Acetyl:2H(3)@K;Acetyl:2H(3)@K	0;24;25	27	QE	0.220955	AASAATAAPTATPAAQESGTIPKKR	0.994753	0.995131	0.937154	0.753093	11	0.985118	0.998841	1	RR	TRUE	trypsin	3	23	4	0.148148	0.115385
High	[R].sNkkLPFNR.[S]	HCD	1.52	0.0023	0.028	0.186	0.28	1	Sequest HT (2)	2	697.914	-0.35	72.4884	21327	21327	Q5HYK7	ArgAcetylD3	RSNKKLPFNR	10	2	72.488	320	10		N-Term(ArgAcetylD3);K3(Acetyl:2H(3));K4(Acetyl:2H(3))	Acetyl:2H(3)@Any N-term;Acetyl:2H(3)@K;Acetyl:2H(3)@K	0;4;5	27	QE	0.222618	SNKKLPFNR	0.947414	0.951638	0.801201	0.337967	6	0.749176	0.97915	1	RR	TRUE	trypsin	3	7	3	0.3	0.3
High	[R].yQkSTELLIR.[K]	HCD	2.27	0.0073	0.1	0.044	0.47	1	Sequest HT (2)	3	499.629	1.02	73.4731	21735	21735	P68431; Q16695; Q5TEC6; Q6NXT2; P84243; Q71DI3	ArgAcetylD3	RYQKSTELLIR	11	3	73.473	321	11		N-Term(ArgAcetylD3);K3(Acetyl:2H(3))	Acetyl:2H(3)@Any N-term;Acetyl:2H(3)@K	0;4	27	QE	0.231573	YQKSTELLIR	0.866314	0.884094	0.690447	0.318105	3	0.0691163	0.966384	1	RR;RR;RR;RR;RR;RR	TRUE	trypsin	1	9	7	0.4375	0.1
High	[R].gQLEALQVDGGR.[L]	HCD	2.72	1.3e-05	6.5e-06	1.57	0.38	1	Sequest HT (2)	2	722.392	1.61	73.8305	21884	21884	P08729	ArgAcetylD3	RGQLEALQVDGGR	13	2	73.83	322	13		N-Term(ArgAcetylD3)	Acetyl:2H(3)@Any N-term	0	27	QE	0.234818	GQLEALQVDGGR	0.981927	0.982606	0.881088	0.604266	5	0.953633	0.992284	0	LR	TRUE	trypsin	1	12	4	0.25	0.0769231
High	[R].mTLTDSIER.[C]	HCD	2.81	0.00092	0.0085	0.315	0.41	1	Sequest HT (2)	2	633.832	0.98	74.2282	22047	22047	O00458	ArgAcetylD3	RMTLTDSIER	10	2	74.228	323	10		N-Term(ArgAcetylD3)	Acetyl:2H(3)@Any N-term	0	27	QE	0.238436	MTLTDSIER	0.95092	0.959502	0.818202	0.290605	7	0.870224	0.96978	1	RR	TRUE	trypsin	4	9	4	0.307692	0.307692
High	[R].gSLcATcGLPVTGR.[C]	HCD	2.9	0.0002	0.00088	0.625	0.52	1	Sequest HT (2)	2	825.418	-0.73	74.5019	22165	22165	O43294	ArgAcetylD3	RGSLCATCGLPVTGR	15	2	74.502	324	15		N-Term(ArgAcetylD3);C4(Carbamidomethyl);C7(Carbamidomethyl)	Acetyl:2H(3)@Any N-term;Carbamidomethyl@C;Carbamidomethyl@C	0;5;8	27	QE	0.240927	GSLCATCGLPVTGR	0.921111	0.932058	0.763977	0.818626	2	0.850364	0.938099	1	RR	TRUE	trypsin	0	11	2	0.153846	0
High	[CR].gYFDEEMNR.[IV]	HCD	2.54	0.00018	0.00069	0.667	0.62	1	Sequest HT (2)	2	681.303	-0.04	74.6097	22210	22210	P58107; Q15149	ArgAcetylD3	RGYFDEEMNR	10	2	74.61	325	10		N-Term(ArgAcetylD3)	Acetyl:2H(3)@Any N-term	0	27	QE	0.241909	GYFDEEMNR	0.923388	0.939759	0.777901	0.373488	8	0.79204	0.96654	0.5	RR;RC	TRUE	trypsin	3	12	4	0.25	0.2
High	[R].fTEELPDER.[E]	HCD	2.23	0.00077	0.0071	0.336	0.4	1	Sequest HT (2)	2	668.83	-3.65	74.7693	22274	22274	Q7Z7F0	ArgAcetylD3	RFTEELPDER	10	2	74.769	326	10		N-Term(ArgAcetylD3)	Acetyl:2H(3)@Any N-term	0	27	QE	0.243355	FTEELPDER	0.993859	0.994484	0.933104	0.777735	5	0.986613	0.995538	1	RR	TRUE	trypsin	0	12	2	0.142857	0
High	[R].yQkSTELLIR.[K]	HCD	3.41	0.00013	0.0005	0.724	0.66	1	Sequest HT (2)	3	499.628	-0.27	74.8875	22321	22321	P68431; Q16695; Q5TEC6; Q6NXT2; P84243; Q71DI3	ArgAcetylD3	RYQKSTELLIR	11	3	74.888	327	11		N-Term(ArgAcetylD3);K3(Acetyl:2H(3))	Acetyl:2H(3)@Any N-term;Acetyl:2H(3)@K	0;4	27	QE	0.244436	YQKSTELLIR	0.986875	0.990243	0.910995	0.920075	8	0.962902	0.992113	1	RR;RR;RR;RR;RR;RR	TRUE	trypsin	0	15	1	0.0625	0
High	[R].yQkSTELLIR.[K]	HCD	2.75	0.00034	0.0021	0.488	0.36	1	Sequest HT (2)	2	748.938	-1.5	74.921	22334	22334	P68431; Q16695; Q5TEC6; Q6NXT2; P84243; Q71DI3	ArgAcetylD3	RYQKSTELLIR	11	2	74.921	328	11		N-Term(ArgAcetylD3);K3(Acetyl:2H(3))	Acetyl:2H(3)@Any N-term;Acetyl:2H(3)@K	0;4	27	QE	0.244736	YQKSTELLIR	0.940421	0.947759	0.793314	0.604972	4	0.89197	0.96032	1	RR;RR;RR;RR;RR;RR	TRUE	trypsin	1	8	3	0.272727	0.111111
High	[R].tMMEDFR.[K]	HCD	2.23	0.0041	0.057	0.112	0.57	1	Sequest HT (2)	2	565.762	-0.23	75.3289	22505	22505	P55884	ArgAcetylD3	RTMMEDFR	8	2	75.329	329	8		N-Term(ArgAcetylD3)	Acetyl:2H(3)@Any N-term	0	27	QE	0.248445	TMMEDFR	0.992778	0.993051	0.924905	0.531472	3	0.985747	0.994314	1	RR	TRUE	trypsin	0	8	4	0.333333	0
High	[R].tGLQkVQSLR.[A]	HCD	2.76	0.00014	0.0006	0.691	0.41	1	Sequest HT (2)	2	688.417	-1.47	75.4028	22534	22534	Q969G5	ArgAcetylD3	RTGLQKVQSLR	11	2	75.403	330	11		N-Term(ArgAcetylD3);K5(Acetyl:2H(3))	Acetyl:2H(3)@Any N-term;Acetyl:2H(3)@K	0;6	27	QE	0.249118	TGLQKVQSLR	0.931889	0.941824	0.781779	0.543152	7	0.417243	0.960814	1	RR	TRUE	trypsin	2	13	3	0.1875	0.133333
High	[R].yQkSTELLIR.[K]	HCD	3.58	5.8e-05	0.00016	0.952	0.64	1	Sequest HT (2)	3	499.628	-0.33	75.4209	22541	22541	P68431; Q16695; Q5TEC6; Q6NXT2; P84243; Q71DI3	ArgAcetylD3	RYQKSTELLIR	11	3	75.421	331	11		N-Term(ArgAcetylD3);K3(Acetyl:2H(3))	Acetyl:2H(3)@Any N-term;Acetyl:2H(3)@K	0;4	27	QE	0.249282	YQKSTELLIR	0.980901	0.985736	0.892344	0.92045	8	0.966878	0.983145	1	RR;RR;RR;RR;RR;RR	TRUE	trypsin	0	15	1	0.0625	0
High	[R].eEFVSIkR.[Q]	HCD	2.56	0.0001	0.00034	0.802	0.32	1	Sequest HT (2)	2	627.36	1.13	75.4511	22556	22556	O43663	ArgAcetylD3	REEFVSIKR	9	2	75.451	332	9		N-Term(ArgAcetylD3);K7(Acetyl:2H(3))	Acetyl:2H(3)@Any N-term;Acetyl:2H(3)@K	0;8	27	QE	0.249555	EEFVSIKR	0.929778	0.94223	0.782551	0.593109	4	0.482309	0.954254	1	RR	TRUE	trypsin	0	10	3	0.230769	0
High	[R].kTPEELLR.[Q]	HCD	2.77	0.00022	0.0011	0.592	0.32	1	Sequest HT (2)	2	616.367	-0.06	75.505	22582	22582	O43633	ArgAcetylD3	RKTPEELLR	9	2	75.505	333	9		N-Term(ArgAcetylD3);K1(Acetyl:2H(3))	Acetyl:2H(3)@Any N-term;Acetyl:2H(3)@K	0;2	27	QE	0.250045	KTPEELLR	0.657198	0.728823	0.519864	0.559934	6	0.502316	0.667493	1	RR	TRUE	trypsin	1	11	2	0.153846	0.0833333
High	[R].nkkQIPSFR.[K]	HCD	2.05	0.0017	0.018	0.231	0.25	1	Sequest HT (2)	2	704.923	1.28	75.5772	22614	22614	Q8WTT2	ArgAcetylD3	RNKKQIPSFR	10	2	75.577	334	10		N-Term(ArgAcetylD3);K2(Acetyl:2H(3));K3(Acetyl:2H(3))	Acetyl:2H(3)@Any N-term;Acetyl:2H(3)@K;Acetyl:2H(3)@K	0;3;4	27	QE	0.2507	NKKQIPSFR	0.968726	0.968901	0.840817	0.456242	4	0.863526	0.978866	1	RR	TRUE	trypsin	1	6	4	0.4	0.142857
High	[R].lSPQAVNSIAkR.[Y]	HCD	4.73	5.8e-05	0.00018	0.929	0.57	1	Sequest HT (2)	3	510.64	0.87	75.8415	22720	22720	P30626	ArgAcetylD3	RLSPQAVNSIAKR	13	3	75.842	335	13		N-Term(ArgAcetylD3);K11(Acetyl:2H(3))	Acetyl:2H(3)@Any N-term;Acetyl:2H(3)@K	0;12	27	QE	0.253109	LSPQAVNSIAKR	0.958472	0.965232	0.831634	0.754071	9	0.950737	0.981329	0	FR	TRUE	trypsin	1	16	3	0.157895	0.0588235
High	[R].lSPQAVNSIAkR.[Y]	HCD	3.11	1.3e-05	4.4e-05	1.2	0.42	1	Sequest HT (2)	2	765.454	-0.9	75.8525	22724	22724	P30626	ArgAcetylD3	RLSPQAVNSIAKR	13	2	75.853	336	13		N-Term(ArgAcetylD3);K11(Acetyl:2H(3))	Acetyl:2H(3)@Any N-term;Acetyl:2H(3)@K	0;12	27	QE	0.253209	LSPQAVNSIAKR	0.938638	0.944091	0.786116	0.524913	2	0.477998	0.966164	0	FR	TRUE	trypsin	1	8	4	0.333333	0.111111
High	[R].yQkSTELLIR.[K]	HCD	3.69	0.00018	0.00072	0.658	0.62	1	Sequest HT (2)	3	499.628	-0.58	75.9433	22762	22762	P68431; Q16695; Q5TEC6; Q6NXT2; P84243; Q71DI3	ArgAcetylD3	RYQKSTELLIR	11	3	75.943	337	11		N-Term(ArgAcetylD3);K3(Acetyl:2H(3))	Acetyl:2H(3)@Any N-term;Acetyl:2H(3)@K	0;4	27	QE	0.254027	YQKSTELLIR	0.992773	0.994575	0.933657	0.920638	8	0.971939	0.997458	1	RR;RR;RR;RR;RR;RR	TRUE	trypsin	0	15	1	0.0625	0
High	[R].aQLGGPEAAkSDETAAk.[-]	HCD	4.09	5.8e-05	0.00022	0.885	0.69	1	Sequest HT (2)	3	645.676	0.68	76.1558	22850	22850	P04792	ArgAcetylD3	RAQLGGPEAAKSDETAAK	18	3	76.156	338	18		N-Term(ArgAcetylD3);K10(Acetyl:2H(3));K17(Acetyl:2H(3))	Acetyl:2H(3)@Any N-term;Acetyl:2H(3)@K;Acetyl:2H(3)@K	0;11;18	27	QE	0.255964	AQLGGPEAAKSDETAAK	0.992159	0.993043	0.924865	0.597187	16	0.984586	0.997621	0	SR	TRUE	trypsin	5	16	3	0.157895	0.238095
High	[R].qQEGFkGTFPDAR.[E]	HCD	4	1.3e-05	2.6e-07	2.18	0.54	1	Sequest HT (2)	2	863.942	-0.45	76.2386	22883	22883	Q15233	ArgAcetylD3	RQQEGFKGTFPDAR	14	2	76.239	339	14		N-Term(ArgAcetylD3);K6(Acetyl:2H(3))	Acetyl:2H(3)@Any N-term;Acetyl:2H(3)@K	0;7	27	QE	0.256718	QQEGFKGTFPDAR	0.988557	0.989311	0.906835	0.255058	7	0.971536	0.993873	1	RR	TRUE	trypsin	4	10	6	0.375	0.285714
High	[R].aQLGGPEAAkSDETAAk.[-]	HCD	5.19	1.3e-05	1.9e-05	1.36	0.73	1	Sequest HT (2)	2	968.011	0.78	76.2663	22893	22893	P04792	ArgAcetylD3	RAQLGGPEAAKSDETAAK	18	2	76.266	340	18		N-Term(ArgAcetylD3);K10(Acetyl:2H(3));K17(Acetyl:2H(3))	Acetyl:2H(3)@Any N-term;Acetyl:2H(3)@K;Acetyl:2H(3)@K	0;11;18	27	QE	0.256964	AQLGGPEAAKSDETAAK	0.990025	0.99165	0.917673	0.698191	17	0.976977	0.994424	0	SR	TRUE	trypsin	3	19	4	0.173913	0.136364
High	[R].kkkkSkGPSAAGEQEPDkESGASVDEVAR.[Q]	HCD	7.04	1.3e-05	1.8e-08	2.68	0.83	1	Sequest HT (2)	4	871.97	-1.46	76.3927	22944	22944	P50579	ArgAcetylD3	RKKKKSKGPSAAGEQEPDKESGASVDEVAR	30	4	76.393	341	30		N-Term(ArgAcetylD3);K1(Acetyl:2H(3));K2(Acetyl:2H(3));K3(Acetyl:2H(3));K4(Acetyl:2H(3));K6(Acetyl:2H(3));K18(Acetyl:2H(3))	Acetyl:2H(3)@Any N-term;Acetyl:2H(3)@K;Acetyl:2H(3)@K;Acetyl:2H(3)@K;Acetyl:2H(3)@K;Acetyl:2H(3)@K;Acetyl:2H(3)@K	0;2;3;4;5;7;19	27	QE	0.258118	KKKKSKGPSAAGEQEPDKESGASVDEVAR	0.989694	0.991115	0.915071	0.801761	23	0.991919	0.990964	1	RR	TRUE	trypsin	8	32	0	0	0.2
High	[R].qQEGFkGTFPDAR.[E]	HCD	3.8	2.3e-05	4.8e-05	1.19	0.65	1	Sequest HT (2)	3	576.297	0.04	76.3939	22945	22945	Q15233	ArgAcetylD3	RQQEGFKGTFPDAR	14	3	76.394	342	14		N-Term(ArgAcetylD3);K6(Acetyl:2H(3))	Acetyl:2H(3)@Any N-term;Acetyl:2H(3)@K	0;7	27	QE	0.258127	QQEGFKGTFPDAR	0.900222	0.913399	0.733104	0.697814	7	0.731046	0.933043	1	RR	TRUE	trypsin	1	15	3	0.166667	0.0625
High	[R].kkkkSkGPSAAGEQEPDkESGASVDEVAR.[Q]	HCD	7.73	1.3e-05	3e-10	3.45	0.88	1	Sequest HT (2)	3	1162.29	-3.15	76.3978	22947	22947	P50579	ArgAcetylD3	RKKKKSKGPSAAGEQEPDKESGASVDEVAR	30	3	76.398	343	30		N-Term(ArgAcetylD3);K1(Acetyl:2H(3));K2(Acetyl:2H(3));K3(Acetyl:2H(3));K4(Acetyl:2H(3));K6(Acetyl:2H(3));K18(Acetyl:2H(3))	Acetyl:2H(3)@Any N-term;Acetyl:2H(3)@K;Acetyl:2H(3)@K;Acetyl:2H(3)@K;Acetyl:2H(3)@K;Acetyl:2H(3)@K;Acetyl:2H(3)@K	0;2;3;4;5;7;19	27	QE	0.258164	KKKKSKGPSAAGEQEPDKESGASVDEVAR	0.988543	0.99	0.909891	0.776196	17	0.983659	0.990838	1	RR	TRUE	trypsin	7	33	2	0.0571429	0.175
High	[R].yQkSTELLIR.[K]	HCD	3.64	0.00011	0.00041	0.763	0.62	1	Sequest HT (2)	3	499.629	1.18	76.4542	22969	22969	P68431; Q16695; Q5TEC6; Q6NXT2; P84243; Q71DI3	ArgAcetylD3	RYQKSTELLIR	11	3	76.454	344	11		N-Term(ArgAcetylD3);K3(Acetyl:2H(3))	Acetyl:2H(3)@Any N-term;Acetyl:2H(3)@K	0;4	27	QE	0.258673	YQKSTELLIR	0.990638	0.992818	0.923656	0.920263	8	0.9663	0.99874	1	RR;RR;RR;RR;RR;RR	TRUE	trypsin	0	15	1	0.0625	0
High	[R].kREELFIEQkkR.[K]	HCD	3.58	1.3e-05	4.5e-06	1.64	0.54	1	Sequest HT (2)	3	647.388	1.52	76.4614	22973	22973	Q9UMY1	ArgAcetylD3	RKREELFIEQKKR	13	3	76.461	345	13		N-Term(ArgAcetylD3);K1(Acetyl:2H(3));K10(Acetyl:2H(3));K11(Acetyl:2H(3))	Acetyl:2H(3)@Any N-term;Acetyl:2H(3)@K;Acetyl:2H(3)@K;Acetyl:2H(3)@K	0;2;11;12	27	QE	0.258736	KREELFIEQKKR	0.97198	0.977985	0.86617	0.840154	9	0.966184	0.976092	NA	NA	FALSE	trypsin	1	17	2	0.105263	0.0555556
High	[R].aTVVVGDLHPLR.[D]	HCD	4.29	5.5e-05	0.00013	0.988	0.63	1	Sequest HT (2)	3	493.294	-0.48	76.5752	23022	23022	Q9NSI2	ArgAcetylD3	RATVVVGDLHPLR	13	3	76.575	346	13		N-Term(ArgAcetylD3)	Acetyl:2H(3)@Any N-term	0	27	QE	0.259773	ATVVVGDLHPLR	0.976165	0.980672	0.874632	0.918856	7	0.998159	0.968733	1	RR	TRUE	trypsin	0	20	2	0.0909091	0
High	[R].qQEGFkGTFPDAR.[E]	HCD	2.57	0.00052	0.0042	0.397	0.52	1	Sequest HT (2)	2	863.94	-2.44	76.7848	23104	23104	Q15233	ArgAcetylD3	RQQEGFKGTFPDAR	14	2	76.785	347	14		N-Term(ArgAcetylD3);K6(Acetyl:2H(3))	Acetyl:2H(3)@Any N-term;Acetyl:2H(3)@K	0;7	27	QE	0.261682	QQEGFKGTFPDAR	0.986143	0.987153	0.897846	0.247417	6	0.958385	0.996092	1	RR	TRUE	trypsin	3	9	7	0.4375	0.25
High	[R].iEEQkLLR.[M]	HCD	2.65	0.0002	0.00092	0.616	0.12	1	Sequest HT (2)	2	637.887	-2.15	76.7869	23105	23105	Q0ZGT2	ArgAcetylD3	RIEEQKLLR	9	2	76.787	348	9		N-Term(ArgAcetylD3);K5(Acetyl:2H(3))	Acetyl:2H(3)@Any N-term;Acetyl:2H(3)@K	0;6	27	QE	0.2617	IEEQKLLR	0.862064	0.888013	0.69583	0.66404	7	0.470522	0.97284	1	RR	TRUE	trypsin	0	14	2	0.125	0
Low	[R].gLAPNTPGkAR.[K]	HCD	1.05	0.47	1	-0.636	0.04	1	Sequest HT (2)	2	664.393	6.27	77.0753	23225	23225	O43663	ArgAcetylD3	RGLAPNTPGKAR	12	2	77.075	349	12		N-Term(ArgAcetylD3);K9(Acetyl:2H(3))	Acetyl:2H(3)@Any N-term;Acetyl:2H(3)@K	0;10	27	QE	0.264318	GLAPNTPGKAR	0.647226	0.682783	0.478461	-0.36117	1	-0.0881935	0.688677	1	RR	TRUE	trypsin	5	2	8	0.8	0.714286
High	[R].lLEGEDAHLTQYkkEPVTTR.[Q]	HCD	4.1	0.00011	0.00039	0.772	0.44	1	Sequest HT (2)	4	655.608	0.25	77.2321	23292	23292	Q04695	ArgAcetylD3	RLLEGEDAHLTQYKKEPVTTR	21	4	77.232	350	21		N-Term(ArgAcetylD3);K13(Acetyl:2H(3));K14(Acetyl:2H(3))	Acetyl:2H(3)@Any N-term;Acetyl:2H(3)@K;Acetyl:2H(3)@K	0;14;15	27	QE	0.265745	LLEGEDAHLTQYKKEPVTTR	0.930462	0.93364	0.766772	0.256997	7	0.552781	0.982689	1	RR	TRUE	trypsin	4	13	10	0.434783	0.235294
High	[R].qQEGFkGTFPDAR.[E]	HCD	3.86	1.3e-05	6.8e-06	1.56	0.63	1	Sequest HT (2)	2	863.945	3.34	77.54	23420	23420	Q15233	ArgAcetylD3	RQQEGFKGTFPDAR	14	2	77.54	351	14		N-Term(ArgAcetylD3);K6(Acetyl:2H(3))	Acetyl:2H(3)@Any N-term;Acetyl:2H(3)@K	0;7	27	QE	0.268545	QQEGFKGTFPDAR	0.985375	0.986399	0.894883	0.411637	6	0.972951	0.996837	1	RR	TRUE	trypsin	3	11	5	0.3125	0.214286
High	[R].lEDFRVDPPMGEEGNHkR.[H]	HCD	4.88	1.3e-05	8.1e-06	1.53	0.63	1	Sequest HT (2)	4	593.798	1.24	77.6178	23454	23454	Q6PKG0	ArgAcetylD3	RLEDFRVDPPMGEEGNHKR	19	4	77.618	352	19		N-Term(ArgAcetylD3);K17(Acetyl:2H(3))	Acetyl:2H(3)@Any N-term;Acetyl:2H(3)@K	0;18	27	QE	0.269255	LEDFRVDPPMGEEGNHKR	0.975624	0.978837	0.868793	0.821291	10	0.982915	0.945376	1	RR	TRUE	trypsin	3	26	2	0.0714286	0.103448
High	[R].eELAPYPkSkkAVSR.[K]	HCD	3.64	0.00012	0.00042	0.757	0.61	1	Sequest HT (2)	2	1020.08	-7.39	78.891	23986	23986	O60828	ArgAcetylD3	REELAPYPKSKKAVSR	16	2	78.891	353	16		N-Term(ArgAcetylD3);K8(Acetyl:2H(3));K10(Acetyl:2H(3));K11(Acetyl:2H(3))	Acetyl:2H(3)@Any N-term;Acetyl:2H(3)@K;Acetyl:2H(3)@K;Acetyl:2H(3)@K	0;9;11;12	27	QE	0.280827	EELAPYPKSKKAVSR	0.93919	0.945736	0.789314	0.713226	4	0.940463	0.947044	1	RR	TRUE	trypsin	3	8	1	0.111111	0.272727
High	[R].gEAHLAVNDFELAR.[A]	HCD	5.13	1.3e-05	1.1e-05	1.46	0.66	1	Sequest HT (2)	3	581.64	3.12	79.2064	24116	24116	Q02790	ArgAcetylD3	RGEAHLAVNDFELAR	15	3	79.206	354	15		N-Term(ArgAcetylD3)	Acetyl:2H(3)@Any N-term	0	27	QE	0.283691	GEAHLAVNDFELAR	0.997511	0.997974	0.959472	0.920164	12	0.999257	0.989728	1	RR	TRUE	trypsin	1	21	1	0.0454545	0.0454545
High	[R].gEAHLAVNDFELAR.[A]	HCD	4.14	1.3e-05	1.7e-05	1.39	0.64	1	Sequest HT (2)	2	871.954	-0.76	79.4062	24197	24197	Q02790	ArgAcetylD3	RGEAHLAVNDFELAR	15	2	79.406	355	15		N-Term(ArgAcetylD3)	Acetyl:2H(3)@Any N-term	0	27	QE	0.285509	GEAHLAVNDFELAR	0.967163	0.972914	0.851492	0.645796	13	0.940078	0.976705	1	RR	TRUE	trypsin	5	18	2	0.1	0.217391
High	[R].gEAHLAVNDFELAR.[A]	HCD	4.68	1.3e-05	2.4e-06	1.75	0.7	1	Sequest HT (2)	3	581.639	0.06	79.7211	24327	24327	Q02790	ArgAcetylD3	RGEAHLAVNDFELAR	15	3	79.721	356	15		N-Term(ArgAcetylD3)	Acetyl:2H(3)@Any N-term	0	27	QE	0.288373	GEAHLAVNDFELAR	0.993297	0.994428	0.932765	0.783151	14	0.995315	0.984048	1	RR	TRUE	trypsin	3	20	2	0.0909091	0.130435
High	[R].gEAHLAVNDFELAR.[A]	HCD	4.18	1.3e-05	1.6e-05	1.4	0.56	1	Sequest HT (2)	3	581.639	0.15	80.3175	24585	24585	Q02790	ArgAcetylD3	RGEAHLAVNDFELAR	15	3	80.318	357	15		N-Term(ArgAcetylD3)	Acetyl:2H(3)@Any N-term	0	27	QE	0.2938	GEAHLAVNDFELAR	0.973429	0.978306	0.867152	0.856664	11	0.995733	0.908288	1	RR	TRUE	trypsin	1	20	2	0.0909091	0.047619
High	[R].iVDGkVVSETNDTkVLRH.[-]	HCD	7.21	1.3e-05	2.9e-08	2.59	0.7	1	Sequest HT (2)	3	767.766	-2.06	80.7411	24778	24778	P05783	ArgAcetylD3	RIVDGKVVSETNDTKVLRH	19	3	80.741	358	19		N-Term(ArgAcetylD3);K5(Acetyl:2H(3));K14(Acetyl:2H(3))	Acetyl:2H(3)@Any N-term;Acetyl:2H(3)@K;Acetyl:2H(3)@K	0;6;15	27	QE	0.297645	IVDGKVVSETNDTKVLRH	0.989496	0.991852	0.918678	0.89853	17	0.991647	0.983663	1	RR	TRUE	trypsin	1	35	2	0.0540541	0.0277778
High	[R].kPDTIEVQQMkAQAR.[E]	HCD	6.72	1.3e-05	1.2e-05	1.45	0.59	1	Sequest HT (2)	3	678.709	0.64	81.3404	25031	25031	P35241; P15311; P26038	ArgAcetylD3	RKPDTIEVQQMKAQAR	16	3	81.34	359	16		N-Term(ArgAcetylD3);K1(Acetyl:2H(3));K11(Acetyl:2H(3))	Acetyl:2H(3)@Any N-term;Acetyl:2H(3)@K;Acetyl:2H(3)@K	0;2;12	27	QE	0.303091	KPDTIEVQQMKAQAR	0.97245	0.978737	0.868485	0.823312	14	0.960031	0.991552	1	RR;RR;RR	TRUE	trypsin	2	24	3	0.111111	0.0769231
High	[R].kPDTIEVQQMkAQAR.[E]	HCD	3.98	1.3e-05	2.4e-08	2.63	0.63	1	Sequest HT (2)	2	1017.56	1.81	81.3567	25038	25038	P35241; P15311; P26038	ArgAcetylD3	RKPDTIEVQQMKAQAR	16	2	81.357	360	16		N-Term(ArgAcetylD3);K1(Acetyl:2H(3));K11(Acetyl:2H(3))	Acetyl:2H(3)@Any N-term;Acetyl:2H(3)@K;Acetyl:2H(3)@K	0;2;12	27	QE	0.303245	KPDTIEVQQMKAQAR	0.92718	0.931613	0.763196	0.292053	7	0.958693	0.890022	1	RR;RR;RR	TRUE	trypsin	9	9	2	0.181818	0.5
High	[R].kImSSPLSkELR.[Q]	HCD	2.28	0.00015	0.00067	0.672	0.4	1	Sequest HT (2)	2	848.492	0.17	81.5714	25139	25139	Q9UNX3; P61254	ArgAcetylD3	RKIMSSPLSKELR	13	2	81.571	361	13		N-Term(ArgAcetylD3);K1(Acetyl:2H(3));M3(Oxidation);K9(Acetyl:2H(3))	Acetyl:2H(3)@Any N-term;Acetyl:2H(3)@K;Oxidation@M;Acetyl:2H(3)@K	0;2;4;10	27	QE	0.305191	KIMSSPLSKELR	0.974871	0.977155	0.863659	0.638895	2	0.530368	0.991109	1	RR;RR	TRUE	trypsin	3	6	1	0.142857	0.333333
High	[R].kImSSPLSkELR.[Q]	HCD	4.45	4.2e-05	8.9e-05	1.07	0.65	1	Sequest HT (2)	3	565.997	-0.28	81.8342	25252	25252	Q9UNX3; P61254	ArgAcetylD3	RKIMSSPLSKELR	13	3	81.834	362	13		N-Term(ArgAcetylD3);K1(Acetyl:2H(3));M3(Oxidation);K9(Acetyl:2H(3))	Acetyl:2H(3)@Any N-term;Acetyl:2H(3)@K;Oxidation@M;Acetyl:2H(3)@K	0;2;4;10	27	QE	0.307582	KIMSSPLSKELR	0.991273	0.99292	0.9242	0.841294	9	0.994612	0.990096	1	RR;RR	TRUE	trypsin	1	18	2	0.1	0.0526316
High	[R].yQkSTELLIR.[K]	HCD	3.31	1.3e-05	3.1e-05	1.27	0.51	1	Sequest HT (2)	2	748.937	-1.85	82.1505	25395	25395	P68431; Q16695; Q5TEC6; Q6NXT2; P84243; Q71DI3	ArgAcetylD3	RYQKSTELLIR	11	2	82.15	363	11		N-Term(ArgAcetylD3);K3(Acetyl:2H(3))	Acetyl:2H(3)@Any N-term;Acetyl:2H(3)@K	0;4	27	QE	0.310455	YQKSTELLIR	0.960523	0.966316	0.834296	0.563602	4	0.899989	0.974123	1	RR;RR;RR;RR;RR;RR	TRUE	trypsin	3	9	2	0.181818	0.25
High	[R].yQkSTELLIR.[K]	HCD	3.52	8.3e-05	0.00029	0.831	0.59	1	Sequest HT (2)	3	499.628	-0.03	82.3876	25499	25499	P68431; Q16695; Q5TEC6; Q6NXT2; P84243; Q71DI3	ArgAcetylD3	RYQKSTELLIR	11	3	82.388	364	11		N-Term(ArgAcetylD3);K3(Acetyl:2H(3))	Acetyl:2H(3)@Any N-term;Acetyl:2H(3)@K	0;4	27	QE	0.312618	YQKSTELLIR	0.988446	0.99142	0.916545	0.851782	9	0.958409	0.995228	1	RR;RR;RR;RR;RR;RR	TRUE	trypsin	1	15	1	0.0625	0.0625
High	[R].yQkSTELLIR.[K]	HCD	3.29	1.3e-05	3.2e-05	1.27	0.54	1	Sequest HT (2)	2	748.938	-0.72	82.6812	25627	25627	P68431; Q16695; Q5TEC6; Q6NXT2; P84243; Q71DI3	ArgAcetylD3	RYQKSTELLIR	11	2	82.681	365	11		N-Term(ArgAcetylD3);K3(Acetyl:2H(3))	Acetyl:2H(3)@Any N-term;Acetyl:2H(3)@K	0;4	27	QE	0.315282	YQKSTELLIR	0.931037	0.941145	0.780497	0.631332	4	0.903053	0.958342	1	RR;RR;RR;RR;RR;RR	TRUE	trypsin	2	9	2	0.181818	0.181818
High	[R].kEYDALkAAkR.[E]	HCD	3.81	1.3e-05	1.2e-05	1.45	0.48	1	Sequest HT (2)	2	814.979	0.01	82.8933	25732	25732	Q96AG4	ArgAcetylD3	RKEYDALKAAKR	12	2	82.893	366	12		N-Term(ArgAcetylD3);K1(Acetyl:2H(3));K7(Acetyl:2H(3));K10(Acetyl:2H(3))	Acetyl:2H(3)@Any N-term;Acetyl:2H(3)@K;Acetyl:2H(3)@K;Acetyl:2H(3)@K	0;2;8;11	27	QE	0.317209	KEYDALKAAKR	0.975883	0.979963	0.872345	0.643622	8	0.966266	0.986417	1	RR	TRUE	trypsin	1	14	4	0.222222	0.0666667
High	[R].nLGSINTELQDVQR.[I]	HCD	4.73	1.3e-05	7.1e-08	2.42	0.52	1	Sequest HT (2)	2	894.475	-0.29	82.9375	25753	25753	O75396	ArgAcetylD3	RNLGSINTELQDVQR	15	2	82.938	367	15		N-Term(ArgAcetylD3)	Acetyl:2H(3)@Any N-term	0	27	QE	0.317618	NLGSINTELQDVQR	0.956477	0.961197	0.822073	0.300649	9	0.932869	0.967688	1	RR	TRUE	trypsin	9	9	2	0.181818	0.5
High	[R].nLGSINTELQDVQR.[I]	HCD	4.79	5.5e-05	0.00015	0.959	0.6	1	Sequest HT (2)	3	596.652	-2.14	82.9621	25765	25765	O75396	ArgAcetylD3	RNLGSINTELQDVQR	15	3	82.962	368	15		N-Term(ArgAcetylD3)	Acetyl:2H(3)@Any N-term	0	27	QE	0.317836	NLGSINTELQDVQR	0.996192	0.997	0.950673	0.760355	10	0.99155	0.998636	1	RR	TRUE	trypsin	2	17	3	0.15	0.105263
High	[R].yQkSTELLIR.[K]	HCD	3.25	1.3e-05	3.7e-05	1.24	0.51	1	Sequest HT (2)	2	748.938	-0.48	83.2122	25883	25883	P68431; Q16695; Q5TEC6; Q6NXT2; P84243; Q71DI3	ArgAcetylD3	RYQKSTELLIR	11	2	83.212	369	11		N-Term(ArgAcetylD3);K3(Acetyl:2H(3))	Acetyl:2H(3)@Any N-term;Acetyl:2H(3)@K	0;4	27	QE	0.320109	YQKSTELLIR	0.95028	0.957418	0.81355	0.563602	4	0.90362	0.964312	1	RR;RR;RR;RR;RR;RR	TRUE	trypsin	3	9	2	0.181818	0.25
Low	[R].eDkNLTGTAR.[Y]	HCD	0.89	0.82	1	-1.51	0.04	1	Sequest HT (2)	1	1350.73	4.43	83.3116	25929	25929	P48729	ArgAcetylD3	REDKNLTGTAR	11	1	83.312	370	11		N-Term(ArgAcetylD3);K3(Acetyl:2H(3))	Acetyl:2H(3)@Any N-term;Acetyl:2H(3)@K	0;4	27	QE	0.321018	EDKNLTGTAR	0.347318	0.382428	0.249824	0.464446	0	NA	0.556946	0	YR	TRUE	trypsin	1	1	3	0.75	0.5
High	[R].qILETMQNDRTTISR.[A]	HCD	2.36	0.0024	0.03	0.178	0.15	1	Sequest HT (2)	3	669.686	-1.51	83.3508	25946	25946	Q08379	ArgAcetylD3	RQILETMQNDRTTISR	16	3	83.351	371	16		N-Term(ArgAcetylD3)	Acetyl:2H(3)@Any N-term	0	27	QE	0.321373	QILETMQNDRTTISR	0.886071	0.898847	0.711188	0.525757	8	0.675508	0.917459	1	RR	TRUE	trypsin	2	15	6	0.285714	0.117647
High	[R].yQkSTELLIR.[K]	HCD	3.67	2.3e-05	5.5e-05	1.16	0.49	1	Sequest HT (2)	2	748.938	-1.64	83.9363	26206	26206	P68431; Q16695; Q5TEC6; Q6NXT2; P84243; Q71DI3	ArgAcetylD3	RYQKSTELLIR	11	2	83.936	372	11		N-Term(ArgAcetylD3);K3(Acetyl:2H(3))	Acetyl:2H(3)@Any N-term;Acetyl:2H(3)@K	0;4	27	QE	0.326691	YQKSTELLIR	0.962383	0.967897	0.838253	0.495028	5	0.886881	0.973626	1	RR;RR;RR;RR;RR;RR	TRUE	trypsin	4	9	2	0.181818	0.307692
High	[R].yQkSTELLIR.[K]	HCD	3.41	1.3e-05	1.6e-05	1.39	0.5	1	Sequest HT (2)	2	748.937	-1.97	84.4727	26443	26443	P68431; Q16695; Q5TEC6; Q6NXT2; P84243; Q71DI3	ArgAcetylD3	RYQKSTELLIR	11	2	84.473	373	11		N-Term(ArgAcetylD3);K3(Acetyl:2H(3))	Acetyl:2H(3)@Any N-term;Acetyl:2H(3)@K	0;4	27	QE	0.331573	YQKSTELLIR	0.965613	0.970075	0.843865	0.431801	5	0.881019	0.976743	1	RR;RR;RR;RR;RR;RR	TRUE	trypsin	5	9	2	0.181818	0.357143
High	[R].qLLATLR.[A]	HCD	2.49	0.00027	0.0014	0.546	0.45	1	Sequest HT (2)	2	508.327	1.05	84.5617	26484	26484	O43159	ArgAcetylD3	RQLLATLR	8	2	84.562	374	8		N-Term(ArgAcetylD3)	Acetyl:2H(3)@Any N-term	0	27	QE	0.332382	QLLATLR	0.942926	0.951242	0.800382	0.504652	3	0.511908	0.976481	1	RR	TRUE	trypsin	0	9	4	0.307692	0
High	[R].vVSEIPVLkTNAGPRDR.[E]	HCD	3.7	0.00012	0.00043	0.752	0.39	1	Sequest HT (2)	3	699.74	0.5	84.5667	26486	26486	Q9Y3C8	ArgAcetylD3	RVVSEIPVLKTNAGPRDR	18	3	84.567	375	18		N-Term(ArgAcetylD3);K9(Acetyl:2H(3))	Acetyl:2H(3)@Any N-term;Acetyl:2H(3)@K	0;10	27	QE	0.332427	VVSEIPVLKTNAGPRDR	0.949102	0.953786	0.805701	0.741039	5	0.940734	0.958486	1	RR	TRUE	trypsin	0	12	4	0.25	0
High	[R].yQkSTELLIR.[K]	HCD	3.3	1.3e-05	2.7e-05	1.3	0.52	1	Sequest HT (2)	2	748.94	1.04	85.0855	26720	26720	P68431; Q16695; Q5TEC6; Q6NXT2; P84243; Q71DI3	ArgAcetylD3	RYQKSTELLIR	11	2	85.086	376	11		N-Term(ArgAcetylD3);K3(Acetyl:2H(3))	Acetyl:2H(3)@Any N-term;Acetyl:2H(3)@K	0;4	27	QE	0.337145	YQKSTELLIR	0.942812	0.948898	0.795599	0.629268	4	0.900942	0.959061	1	RR;RR;RR;RR;RR;RR	TRUE	trypsin	2	9	2	0.181818	0.181818
High	[R].aGGPEGPPWLPR.[T]	HCD	3.12	5.8e-05	0.00021	0.895	0.41	1	Sequest HT (2)	2	717.887	-0.5	85.1271	26737	26737	Q14166	ArgAcetylD3	RAGGPEGPPWLPR	13	2	85.127	377	13		N-Term(ArgAcetylD3)	Acetyl:2H(3)@Any N-term	0	27	QE	0.337518	AGGPEGPPWLPR	0.936273	0.947821	0.793439	0.618053	7	0.808015	0.967844	1	RR	TRUE	trypsin	2	12	3	0.2	0.142857
High	[R].lQQTQNQVDEVVDImR.[V]	HCD	1.9	0.0068	0.093	0.056	0.43	1	Sequest HT (2)	2	1067.04	-0.93	85.4781	26890	26890	Q15836	ArgAcetylD3	RLQQTQNQVDEVVDIMR	17	2	85.478	378	17		N-Term(ArgAcetylD3);M15(Oxidation)	Acetyl:2H(3)@Any N-term;Oxidation@M	0;16	27	QE	0.340709	LQQTQNQVDEVVDIMR	0.988405	0.989106	0.905947	0.717811	3	0.991629	0.982405	1	RR	TRUE	trypsin	0	6	4	0.4	0
High	[R].nFILDQTNVSAAAQR.[K]	HCD	2.88	5.8e-05	0.00021	0.897	0.46	1	Sequest HT (2)	2	924.993	1.86	85.5983	26942	26942	Q00839	ArgAcetylD3	RNFILDQTNVSAAAQR	16	2	85.598	379	16		N-Term(ArgAcetylD3)	Acetyl:2H(3)@Any N-term	0	27	QE	0.3418	NFILDQTNVSAAAQR	0.968214	0.970145	0.844047	0.272826	2	0.969121	0.969274	1	KR	TRUE	trypsin	2	5	8	0.615385	0.285714
High	[R].yQkSTELLIR.[K]	HCD	2.92	8.3e-05	0.00029	0.831	0.39	1	Sequest HT (2)	2	748.938	-0.59	85.6507	26963	26963	P68431; Q16695; Q5TEC6; Q6NXT2; P84243; Q71DI3	ArgAcetylD3	RYQKSTELLIR	11	2	85.651	380	11		N-Term(ArgAcetylD3);K3(Acetyl:2H(3))	Acetyl:2H(3)@Any N-term;Acetyl:2H(3)@K	0;4	27	QE	0.342282	YQKSTELLIR	0.95706	0.956215	0.810916	0.791839	4	0.8948	0.975113	1	RR;RR;RR;RR;RR;RR	TRUE	trypsin	0	9	2	0.181818	0
High	[R].nFAELkIkR.[L]	HCD	2.01	0.00083	0.0076	0.327	0.27	1	Sequest HT (2)	2	705.428	-5.88	85.8172	27035	27035	P18124	ArgAcetylD3	RNFAELKIKR	10	2	85.817	381	10		N-Term(ArgAcetylD3);K6(Acetyl:2H(3));K8(Acetyl:2H(3))	Acetyl:2H(3)@Any N-term;Acetyl:2H(3)@K;Acetyl:2H(3)@K	0;7;9	27	QE	0.343791	NFAELKIKR	0.924379	0.923949	0.750115	0.227027	5	0.38816	0.965529	1	RR	TRUE	trypsin	2	9	6	0.4	0.181818
High	[R].nFAELkIkR.[L]	HCD	3.82	8.3e-05	0.00026	0.85	0.55	1	Sequest HT (2)	3	470.624	-0.24	85.9694	27103	27103	P18124	ArgAcetylD3	RNFAELKIKR	10	3	85.969	382	10		N-Term(ArgAcetylD3);K6(Acetyl:2H(3));K8(Acetyl:2H(3))	Acetyl:2H(3)@Any N-term;Acetyl:2H(3)@K;Acetyl:2H(3)@K	0;7;9	27	QE	0.345173	NFAELKIKR	0.994882	0.99612	0.943901	0.873359	7	0.990914	0.997308	1	RR	TRUE	trypsin	1	15	1	0.0625	0.0625
High	[R].gEDVETSkkWAAGQNkQHSITkNTAkLDR.[E]	HCD	7.64	1.3e-05	1.4e-08	2.73	0.66	1	Sequest HT (2)	4	917.496	3.73	86.3574	27267	27267	O60869	ArgAcetylD3	RGEDVETSKKWAAGQNKQHSITKNTAKLDR	30	4	86.357	383	30		N-Term(ArgAcetylD3);K8(Acetyl:2H(3));K9(Acetyl:2H(3));K16(Acetyl:2H(3));K22(Acetyl:2H(3));K26(Acetyl:2H(3))	Acetyl:2H(3)@Any N-term;Acetyl:2H(3)@K;Acetyl:2H(3)@K;Acetyl:2H(3)@K;Acetyl:2H(3)@K;Acetyl:2H(3)@K	0;9;10;17;23;27	27	QE	0.3487	GEDVETSKKWAAGQNKQHSITKNTAKLDR	0.969575	0.974662	0.856385	0.851636	14	0.930298	0.993571	1	RR	TRUE	trypsin	4	33	1	0.0294118	0.108108
High	[R].gEDVETSkkWAAGQNkQHSITkNTAkLDR.[E]	HCD	8.19	1.3e-05	1e-12	4.52	0.78	1	Sequest HT (2)	3	1222.99	4.52	86.3675	27272	27272	O60869	ArgAcetylD3	RGEDVETSKKWAAGQNKQHSITKNTAKLDR	30	3	86.368	384	30		N-Term(ArgAcetylD3);K8(Acetyl:2H(3));K9(Acetyl:2H(3));K16(Acetyl:2H(3));K22(Acetyl:2H(3));K26(Acetyl:2H(3))	Acetyl:2H(3)@Any N-term;Acetyl:2H(3)@K;Acetyl:2H(3)@K;Acetyl:2H(3)@K;Acetyl:2H(3)@K;Acetyl:2H(3)@K	0;9;10;17;23;27	27	QE	0.3488	GEDVETSKKWAAGQNKQHSITKNTAKLDR	0.918772	0.937057	0.772922	0.803079	22	0.837197	0.96283	1	RR	TRUE	trypsin	3	44	5	0.102041	0.0638298
High	[R].gGVkRISGLIYEETR.[G]	HCD	3.93	3.2e-05	8.5e-05	1.07	0.59	1	Sequest HT (2)	3	642.033	-1.32	86.5577	27357	27357	P62805	ArgAcetylD3	RGGVKRISGLIYEETR	16	3	86.558	385	16		N-Term(ArgAcetylD3);K4(Acetyl:2H(3))	Acetyl:2H(3)@Any N-term;Acetyl:2H(3)@K	0;5	27	QE	0.350527	GGVKRISGLIYEETR	0.874792	0.890347	0.699076	0.5207	4	0.58597	0.935585	1	RR	TRUE	trypsin	0	13	8	0.380952	0
High	[R].lLEGEDAHLTQYkkEPVTTR.[Q]	HCD	6.04	1.3e-05	1.9e-08	2.67	0.76	1	Sequest HT (2)	3	873.808	-0.05	86.8434	27480	27480	Q04695	ArgAcetylD3	RLLEGEDAHLTQYKKEPVTTR	21	3	86.843	386	21		N-Term(ArgAcetylD3);K13(Acetyl:2H(3));K14(Acetyl:2H(3))	Acetyl:2H(3)@Any N-term;Acetyl:2H(3)@K;Acetyl:2H(3)@K	0;14;15	27	QE	0.353118	LLEGEDAHLTQYKKEPVTTR	0.923882	0.938375	0.775338	0.795593	16	0.867451	0.995158	1	RR	TRUE	trypsin	0	29	5	0.147059	0
High	[R].lLEGEDAHLTQYkkEPVTTR.[Q]	HCD	4.64	1.3e-05	1e-05	1.49	0.67	1	Sequest HT (2)	4	655.607	-0.22	86.8642	27489	27489	Q04695	ArgAcetylD3	RLLEGEDAHLTQYKKEPVTTR	21	4	86.864	387	21		N-Term(ArgAcetylD3);K13(Acetyl:2H(3));K14(Acetyl:2H(3))	Acetyl:2H(3)@Any N-term;Acetyl:2H(3)@K;Acetyl:2H(3)@K	0;14;15	27	QE	0.353309	LLEGEDAHLTQYKKEPVTTR	0.967953	0.971213	0.846876	0.621976	16	0.857406	0.984736	1	RR	TRUE	trypsin	5	20	3	0.130435	0.2
High	[R].eYLkTLNEEkR.[K]	HCD	4.13	9.8e-05	0.00033	0.804	0.39	1	Sequest HT (2)	3	571.988	0.25	87.0745	27575	27575	P80303	ArgAcetylD3	REYLKTLNEEKR	12	3	87.074	388	12		N-Term(ArgAcetylD3);K4(Acetyl:2H(3));K10(Acetyl:2H(3))	Acetyl:2H(3)@Any N-term;Acetyl:2H(3)@K;Acetyl:2H(3)@K	0;5;11	27	QE	0.355218	EYLKTLNEEKR	0.990184	0.992301	0.920951	0.765469	9	0.985382	0.99372	1	RR	TRUE	trypsin	2	14	2	0.125	0.125
High	[R].fGDkLNFR.[Q]	HCD	2.44	0.00032	0.0018	0.508	0.61	1	Sequest HT (2)	2	621.846	-0.45	87.0881	27581	27581	Q13794	ArgAcetylD3	RFGDKLNFR	9	2	87.088	389	9		N-Term(ArgAcetylD3);K4(Acetyl:2H(3))	Acetyl:2H(3)@Any N-term;Acetyl:2H(3)@K	0;5	27	QE	0.355345	FGDKLNFR	0.937568	0.944676	0.787247	0.601173	4	0.871464	0.960228	1	RR	TRUE	trypsin	0	11	4	0.266667	0
High	[R].yQkSTELLIR.[K]	HCD	2.12	0.0044	0.06	0.107	0.38	1	Sequest HT (2)	2	748.936	-3.18	87.9924	27965	27965	P68431; Q16695; Q5TEC6; Q6NXT2; P84243; Q71DI3	ArgAcetylD3	RYQKSTELLIR	11	2	87.992	390	11		N-Term(ArgAcetylD3);K3(Acetyl:2H(3))	Acetyl:2H(3)@Any N-term;Acetyl:2H(3)@K	0;4	27	QE	0.363564	YQKSTELLIR	0.946957	0.945463	0.78878	0.623358	4	0.756666	0.976629	1	RR;RR;RR;RR;RR;RR	TRUE	trypsin	1	8	3	0.272727	0.111111
Medium	[R].gPSWDPFR.[D]	HCD	1.48	0.015	0.24	-0.059	0.09	1	Sequest HT (2)	2	581.796	1.51	88.1053	28010	28010	P04792	ArgAcetylD3	RGPSWDPFR	9	2	88.105	391	9		N-Term(ArgAcetylD3)	Acetyl:2H(3)@Any N-term	0	27	QE	0.364591	GPSWDPFR	0.98983	0.990714	0.913177	0.0414223	4	0.974832	0.997657	0	LR	TRUE	trypsin	1	7	9	0.5625	0.125
High	[R].lLEGEDAHLTQYkkEPVTTR.[Q]	HCD	5.77	1.3e-05	8.9e-07	1.94	0.63	1	Sequest HT (2)	3	873.807	-1.29	88.2716	28077	28077	Q04695	ArgAcetylD3	RLLEGEDAHLTQYKKEPVTTR	21	3	88.272	392	21		N-Term(ArgAcetylD3);K13(Acetyl:2H(3));K14(Acetyl:2H(3))	Acetyl:2H(3)@Any N-term;Acetyl:2H(3)@K;Acetyl:2H(3)@K	0;14;15	27	QE	0.366109	LLEGEDAHLTQYKKEPVTTR	0.862888	0.890157	0.698811	0.670265	16	0.821362	0.914176	1	RR	TRUE	trypsin	3	29	5	0.147059	0.09375
High	[R].gDMSSNPAkETFTTGLDAPR.[N]	HCD	5.06	1.3e-05	1e-05	1.48	0.6	1	Sequest HT (2)	3	781.047	-4.33	88.9617	28365	28365	P24821	ArgAcetylD3	RGDMSSNPAKETFTTGLDAPR	21	3	88.962	393	21		N-Term(ArgAcetylD3);K9(Acetyl:2H(3))	Acetyl:2H(3)@Any N-term;Acetyl:2H(3)@K	0;10	27	QE	0.372382	GDMSSNPAKETFTTGLDAPR	0.988879	0.990744	0.913318	0.82275	14	0.995593	0.989391	1	RR	TRUE	trypsin	3	24	2	0.0769231	0.111111
High	[R].aQkkAQIEEEkkNAEkEkQQR.[N]	HCD	5.42	1.3e-05	1.9e-06	1.8	0.69	1	Sequest HT (2)	4	753.924	-2.19	89.1979	28466	28466	Q9BXJ9	ArgAcetylD3	RAQKKAQIEEEKKNAEKEKQQR	22	4	89.198	394	22		N-Term(ArgAcetylD3);K3(Acetyl:2H(3));K4(Acetyl:2H(3));K11(Acetyl:2H(3));K12(Acetyl:2H(3));K16(Acetyl:2H(3));K18(Acetyl:2H(3))	Acetyl:2H(3)@Any N-term;Acetyl:2H(3)@K;Acetyl:2H(3)@K;Acetyl:2H(3)@K;Acetyl:2H(3)@K;Acetyl:2H(3)@K;Acetyl:2H(3)@K	0;4;5;12;13;17;19	27	QE	0.374527	AQKKAQIEEEKKNAEKEKQQR	0.968415	0.97482	0.856835	0.831244	16	0.990723	0.953807	1	RR	TRUE	trypsin	2	25	3	0.107143	0.0740741
High	[R].aQkkAQIEEEkkNAEkEkQQR.[N]	HCD	6.53	1.3e-05	2.5e-10	3.48	0.8	1	Sequest HT (2)	3	1004.9	1.63	89.2293	28481	28481	Q9BXJ9	ArgAcetylD3	RAQKKAQIEEEKKNAEKEKQQR	22	3	89.229	395	22		N-Term(ArgAcetylD3);K3(Acetyl:2H(3));K4(Acetyl:2H(3));K11(Acetyl:2H(3));K12(Acetyl:2H(3));K16(Acetyl:2H(3));K18(Acetyl:2H(3))	Acetyl:2H(3)@Any N-term;Acetyl:2H(3)@K;Acetyl:2H(3)@K;Acetyl:2H(3)@K;Acetyl:2H(3)@K;Acetyl:2H(3)@K;Acetyl:2H(3)@K	0;4;5;12;13;17;19	27	QE	0.374809	AQKKAQIEEEKKNAEKEKQQR	0.995031	0.99624	0.944775	0.858236	20	0.989333	0.997735	1	RR	TRUE	trypsin	2	31	3	0.0882353	0.0606061
Low	[R].qEkMADPESNQEAVNSSAAR.[T]	HCD	1.11	0.69	1	-0.934	0.05	1	Sequest HT (2)	2	1204.58	6.64	89.9806	28798	28798	Q14669	ArgAcetylD3	RQEKMADPESNQEAVNSSAAR	21	2	89.981	396	21		N-Term(ArgAcetylD3);K3(Acetyl:2H(3))	Acetyl:2H(3)@Any N-term;Acetyl:2H(3)@K	0;4	27	QE	0.381645	QEKMADPESNQEAVNSSAAR	-0.0137587	0.0211181	0.0134451	0.275352	1	-0.0288385	-0.00383633	1	RR	TRUE	trypsin	2	1	9	0.9	0.666667
High	[R].dALkMkLNkAR.[K]	HCD	3.5	8.3e-05	0.00026	0.848	0.68	1	Sequest HT (2)	3	541.997	1.38	90.5761	29040	29040	Q8IWR0	ArgAcetylD3	RDALKMKLNKAR	12	3	90.576	397	12		N-Term(ArgAcetylD3);K4(Acetyl:2H(3));K6(Acetyl:2H(3));K9(Acetyl:2H(3))	Acetyl:2H(3)@Any N-term;Acetyl:2H(3)@K;Acetyl:2H(3)@K;Acetyl:2H(3)@K	0;5;7;10	27	QE	0.387055	DALKMKLNKAR	0.993084	0.994153	0.931122	0.888231	7	0.99164	0.994448	1	RR	TRUE	trypsin	1	15	1	0.0625	0.0625
High	[R].aSDTSLTQGLkAFR.[Q]	HCD	3.68	0.00012	0.00048	0.734	0.64	1	Sequest HT (2)	3	580.988	-1.26	91.6082	29463	29463	P57059; A0A0B4J2F2	ArgAcetylD3	RASDTSLTQGLKAFR	15	3	91.608	398	15		N-Term(ArgAcetylD3);K11(Acetyl:2H(3))	Acetyl:2H(3)@Any N-term;Acetyl:2H(3)@K	0;12	27	QE	0.396436	ASDTSLTQGLKAFR	0.961482	0.968588	0.840013	0.702427	8	0.9942	0.950078	1	RR;RR	TRUE	trypsin	2	16	4	0.2	0.111111
High	[R].kIMSSPLSkELR.[Q]	HCD	2.6	0.00028	0.0015	0.535	0.4	1	Sequest HT (2)	2	840.494	-0.64	91.7859	29536	29536	Q9UNX3; P61254	ArgAcetylD3	RKIMSSPLSKELR	13	2	91.786	399	13		N-Term(ArgAcetylD3);K1(Acetyl:2H(3));K9(Acetyl:2H(3))	Acetyl:2H(3)@Any N-term;Acetyl:2H(3)@K;Acetyl:2H(3)@K	0;2;10	27	QE	0.398055	KIMSSPLSKELR	0.767402	0.790912	0.580787	0.654635	3	0.776146	0.775706	1	RR;RR	TRUE	trypsin	1	10	3	0.230769	0.0909091
High	[R].kIMSSPLSkELR.[Q]	HCD	4.71	1.3e-05	4.7e-06	1.63	0.63	1	Sequest HT (2)	3	560.666	0.04	91.8066	29546	29546	Q9UNX3; P61254	ArgAcetylD3	RKIMSSPLSKELR	13	3	91.807	400	13		N-Term(ArgAcetylD3);K1(Acetyl:2H(3));K9(Acetyl:2H(3))	Acetyl:2H(3)@Any N-term;Acetyl:2H(3)@K;Acetyl:2H(3)@K	0;2;10	27	QE	0.398245	KIMSSPLSKELR	0.986246	0.989205	0.906372	0.813233	9	0.987314	0.986224	1	RR;RR	TRUE	trypsin	3	19	1	0.05	0.136364
High	[R].qATkDAGTIAGLNVLR.[I]	HCD	4.47	1.3e-05	2.3e-05	1.33	0.65	1	Sequest HT (2)	3	625.362	-0.06	92.1119	29670	29670	P11142	ArgAcetylD3	RQATKDAGTIAGLNVLR	17	3	92.112	401	17		N-Term(ArgAcetylD3);K4(Acetyl:2H(3))	Acetyl:2H(3)@Any N-term;Acetyl:2H(3)@K	0;5	27	QE	0.401018	QATKDAGTIAGLNVLR	0.988485	0.989358	0.907042	0.785302	12	0.968057	0.992678	0	QR	TRUE	trypsin	0	21	4	0.16	0
High	[R].qkHSQAVEELAEQLEQTkR.[V]	HCD	7.61	1.3e-05	9.1e-10	3.24	0.73	1	Sequest HT (2)	3	848.456	0.89	92.1594	29689	29689	P35579	ArgAcetylD3	RQKHSQAVEELAEQLEQTKR	20	3	92.159	402	20		N-Term(ArgAcetylD3);K2(Acetyl:2H(3));K18(Acetyl:2H(3))	Acetyl:2H(3)@Any N-term;Acetyl:2H(3)@K;Acetyl:2H(3)@K	0;3;19	27	QE	0.401445	QKHSQAVEELAEQLEQTKR	0.974194	0.980155	0.872961	0.84987	24	0.990183	0.933994	0	MR	TRUE	trypsin	3	35	2	0.0540541	0.0789474
High	[R].qATkDAGTIAGLNVLR.[I]	HCD	2.99	1.3e-05	3.1e-05	1.27	0.58	1	Sequest HT (2)	2	937.542	2	92.2116	29709	29709	P11142	ArgAcetylD3	RQATKDAGTIAGLNVLR	17	2	92.212	403	17		N-Term(ArgAcetylD3);K4(Acetyl:2H(3))	Acetyl:2H(3)@Any N-term;Acetyl:2H(3)@K	0;5	27	QE	0.401927	QATKDAGTIAGLNVLR	0.936698	0.941524	0.781212	0.575183	6	0.964184	0.984048	0	QR	TRUE	trypsin	5	8	1	0.111111	0.384615
High	[R].eLITPkGGGGGGPGEGFDVAkTGDAR.[I]	HCD	7.52	1.3e-05	1.3e-09	3.17	0.78	1	Sequest HT (2)	3	912.142	0.81	92.7287	29922	29922	Q9Y295	ArgAcetylD3	RELITPKGGGGGGPGEGFDVAKTGDAR	27	3	92.729	404	27		N-Term(ArgAcetylD3);K6(Acetyl:2H(3));K21(Acetyl:2H(3))	Acetyl:2H(3)@Any N-term;Acetyl:2H(3)@K;Acetyl:2H(3)@K	0;7;22	27	QE	0.406627	ELITPKGGGGGGPGEGFDVAKTGDAR	0.984322	0.987028	0.897348	0.715001	20	0.978131	0.991878	1	RR	TRUE	trypsin	10	34	2	0.0555556	0.227273
High	[R].aLkSEFLVR.[E]	HCD	3.64	5e-05	9.5e-05	1.05	0.5	1	Sequest HT (2)	2	654.898	-0.66	92.8088	29956	29956	Q96QR8; Q00577	ArgAcetylD3	RALKSEFLVR	10	2	92.809	405	10		N-Term(ArgAcetylD3);K3(Acetyl:2H(3))	Acetyl:2H(3)@Any N-term;Acetyl:2H(3)@K	0;4	27	QE	0.407355	ALKSEFLVR	0.940148	0.950423	0.798699	0.676834	5	0.825808	0.958499	1	RR;RR	TRUE	trypsin	0	11	3	0.214286	0
High	[R].aEDGSVIDYELIDQDAR.[D]	HCD	5.32	1.3e-05	8e-07	1.96	0.66	1	Sequest HT (2)	3	704.009	-0.34	92.8628	29979	29979	P07355	ArgAcetylD3	RAEDGSVIDYELIDQDAR	18	3	92.863	406	18		N-Term(ArgAcetylD3)	Acetyl:2H(3)@Any N-term	0	27	QE	0.407845	AEDGSVIDYELIDQDAR	0.891963	0.912903	0.732329	0.774898	10	0.808067	0.954632	1	RR	TRUE	trypsin	3	21	2	0.0869565	0.125
High	[R].aEDGSVIDYELIDQDAR.[D]	HCD	6.1	1.3e-05	1.8e-10	3.54	0.76	1	Sequest HT (2)	2	1055.51	0.85	92.9218	30004	30004	P07355	ArgAcetylD3	RAEDGSVIDYELIDQDAR	18	2	92.922	407	18		N-Term(ArgAcetylD3)	Acetyl:2H(3)@Any N-term	0	27	QE	0.408382	AEDGSVIDYELIDQDAR	0.931565	0.941537	0.781237	0.558442	13	0.931589	0.932311	1	RR	TRUE	trypsin	8	18	2	0.1	0.307692
High	[R].aPEEELPPLDPEEIR.[K]	HCD	4.28	1.3e-05	4.5e-06	1.64	0.62	1	Sequest HT (2)	2	967.997	-1.29	93.725	30335	30335	Q8IY67	ArgAcetylD3	RAPEEELPPLDPEEIR	16	2	93.725	408	16		N-Term(ArgAcetylD3)	Acetyl:2H(3)@Any N-term	0	27	QE	0.415682	APEEELPPLDPEEIR	0.996168	0.996406	0.946009	0.557738	7	0.998159	0.996366	1	RR	TRUE	trypsin	3	15	5	0.25	0.166667
High	[R].aLAAQLPVLPR.[S]	HCD	3.1	0.00012	0.00046	0.739	0.52	1	Sequest HT (2)	2	675.427	0.62	94.5061	30659	30659	Q96GK7	ArgAcetylD3	RALAAQLPVLPR	12	2	94.506	409	12		N-Term(ArgAcetylD3)	Acetyl:2H(3)@Any N-term	0	27	QE	0.422782	ALAAQLPVLPR	0.905255	0.923551	0.749453	0.629739	6	0.690193	0.960895	1	RR	TRUE	trypsin	2	12	2	0.142857	0.142857
High	[R].kVDWLTEkMHAR.[D]	HCD	4.17	1.3e-05	2.5e-06	1.74	0.62	1	Sequest HT (2)	3	602.333	-0.31	94.6205	30709	30709	Q14240; P60842	ArgAcetylD3	RKVDWLTEKMHAR	13	3	94.621	410	13		N-Term(ArgAcetylD3);K1(Acetyl:2H(3));K8(Acetyl:2H(3))	Acetyl:2H(3)@Any N-term;Acetyl:2H(3)@K;Acetyl:2H(3)@K	0;2;9	27	QE	0.423827	KVDWLTEKMHAR	0.996947	0.997509	0.955057	0.797275	11	0.997809	0.997931	1	RR;RR	TRUE	trypsin	3	22	2	0.0833333	0.12
High	[R].lIFAGkQLEDGR.[T]	HCD	3.95	1.3e-05	1.9e-05	1.37	0.57	1	Sequest HT (2)	2	796.956	1.53	94.7818	30775	30775	P62987; P0CG47; P0CG48; P62979	ArgAcetylD3	RLIFAGKQLEDGR	13	2	94.782	411	13		N-Term(ArgAcetylD3);K6(Acetyl:2H(3))	Acetyl:2H(3)@Any N-term;Acetyl:2H(3)@K	0;7	27	QE	0.425291	LIFAGKQLEDGR	0.975594	0.978422	0.867511	0.50114	7	0.942701	0.987786	0	QR;QR;QR;QR	TRUE	trypsin	5	11	2	0.153846	0.3125
High	[R].lIFAGkQLEDGR.[T]	HCD	3.7	8.3e-05	0.00028	0.839	0.68	1	Sequest HT (2)	3	531.639	0.49	94.8882	30819	30819	P62987; P0CG47; P0CG48; P62979	ArgAcetylD3	RLIFAGKQLEDGR	13	3	94.888	412	13		N-Term(ArgAcetylD3);K6(Acetyl:2H(3))	Acetyl:2H(3)@Any N-term;Acetyl:2H(3)@K	0;7	27	QE	0.426255	LIFAGKQLEDGR	0.984954	0.987898	0.900859	0.813341	8	0.963349	0.995902	0	QR;QR;QR;QR	TRUE	trypsin	2	15	1	0.0625	0.117647
High	[R].aMELLkVSkDkR.[A]	HCD	4.12	5.5e-05	0.00013	0.988	0.63	1	Sequest HT (2)	3	585.351	0.12	96.0999	31325	31325	Q9Y3U8	ArgAcetylD3	RAMELLKVSKDKR	13	3	96.1	413	13		N-Term(ArgAcetylD3);K6(Acetyl:2H(3));K9(Acetyl:2H(3));K11(Acetyl:2H(3))	Acetyl:2H(3)@Any N-term;Acetyl:2H(3)@K;Acetyl:2H(3)@K;Acetyl:2H(3)@K	0;7;10;12	27	QE	0.437273	AMELLKVSKDKR	0.997678	0.998086	0.960602	0.826911	8	0.993478	0.998798	1	RR	TRUE	trypsin	2	17	1	0.0555556	0.105263
Low	[R].dEkNkLQkEkALR.[D]	HCD	2.14	0.23	0.96	-0.438	0.14	1	Sequest HT (2)	3	661.055	-7.06	98.2995	32240	32240	Q9BQG0	ArgAcetylD3	RDEKNKLQKEKALR	14	3	98.299	414	14		N-Term(ArgAcetylD3);K3(Acetyl:2H(3));K5(Acetyl:2H(3));K8(Acetyl:2H(3));K10(Acetyl:2H(3))	Acetyl:2H(3)@Any N-term;Acetyl:2H(3)@K;Acetyl:2H(3)@K;Acetyl:2H(3)@K;Acetyl:2H(3)@K	0;4;6;9;11	27	QE	0.457264	DEKNKLQKEKALR	0.527525	0.584672	0.397554	0.0243319	4	0.296404	0.639921	1	RR	TRUE	trypsin	2	9	11	0.55	0.181818
High	[R].sTQGVTLTDLQEAEkTIGR.[S]	HCD	4.5	1.3e-05	1.4e-08	2.73	0.7	1	Sequest HT (2)	2	1147.12	1.75	99.3055	32653	32653	O14974	ArgAcetylD3	RSTQGVTLTDLQEAEKTIGR	20	2	99.305	415	20		N-Term(ArgAcetylD3);K15(Acetyl:2H(3))	Acetyl:2H(3)@Any N-term;Acetyl:2H(3)@K	0;16	27	QE	0.466409	STQGVTLTDLQEAEKTIGR	0.985931	0.987091	0.897596	0.824607	4	0.98675	0.985071	1	RR	TRUE	trypsin	1	10	2	0.166667	0.0909091
High	[R].eIAQEFkTDLR.[F]	HCD	2.08	0.0008	0.0073	0.332	0.21	1	Sequest HT (2)	2	798.44	4.92	99.5693	32758	32758	Q5TEC6	ArgAcetylD3	REIAQEFKTDLR	12	2	99.569	416	12		N-Term(ArgAcetylD3);K7(Acetyl:2H(3))	Acetyl:2H(3)@Any N-term;Acetyl:2H(3)@K	0;8	27	QE	0.468809	EIAQEFKTDLR	0.977343	0.979254	0.870099	0.0392529	6	0.984517	0.975257	0	VR	TRUE	trypsin	4	9	7	0.4375	0.307692
High	[R].lQQTQNQVDEVVDIMR.[V]	HCD	7.34	1.3e-05	3.8e-06	1.67	0.72	1	Sequest HT (2)	3	706.366	-0.59	99.8133	32860	32860	Q15836	ArgAcetylD3	RLQQTQNQVDEVVDIMR	17	3	99.813	417	17		N-Term(ArgAcetylD3)	Acetyl:2H(3)@Any N-term	0	27	QE	0.471027	LQQTQNQVDEVVDIMR	0.986991	0.989995	0.909873	0.844231	16	0.980248	0.990012	1	RR	TRUE	trypsin	2	25	2	0.0740741	0.0740741
High	[R].iQDPVLQAVTSQTSLPGH.[-]	HCD	3.84	1.3e-05	3.5e-05	1.25	0.52	1	Sequest HT (2)	3	698.046	0.71	100.443	33114	33114	Q9UBP6	ArgAcetylD3	RIQDPVLQAVTSQTSLPGH	19	3	100.443	418	19		N-Term(ArgAcetylD3)	Acetyl:2H(3)@Any N-term	0	27	QE	0.476755	IQDPVLQAVTSQTSLPGH	0.986103	0.987945	0.901049	0.720513	14	0.991745	0.986188	1	RR	TRUE	trypsin	0	21	7	0.25	0
High	[R].qILDEAGkVGELcAGkER.[E]	HCD	5.21	1.3e-05	1.6e-06	1.83	0.55	1	Sequest HT (2)	3	755.406	0.35	100.504	33140	33140	P18206	ArgAcetylD3	RQILDEAGKVGELCAGKER	19	3	100.504	419	19		N-Term(ArgAcetylD3);K8(Acetyl:2H(3));C13(Carbamidomethyl);K16(Acetyl:2H(3))	Acetyl:2H(3)@Any N-term;Acetyl:2H(3)@K;Carbamidomethyl@C;Acetyl:2H(3)@K	0;9;14;17	27	QE	0.477309	QILDEAGKVGELCAGKER	0.989496	0.991439	0.916637	0.759518	12	0.992314	0.988894	0	IR	TRUE	trypsin	2	23	4	0.148148	0.08
High	[R].gIkkITSTAL.[-]	HCD	3	0.0016	0.016	0.243	0.75	1	Sequest HT (2)	2	661.92	-1.16	101.609	33586	33586	P51812	ArgAcetylD3	RGIKKITSTAL	11	2	101.609	420	11		N-Term(ArgAcetylD3);K3(Acetyl:2H(3));K4(Acetyl:2H(3))	Acetyl:2H(3)@Any N-term;Acetyl:2H(3)@K;Acetyl:2H(3)@K	0;4;5	27	QE	0.487355	GIKKITSTAL	0.972418	0.977414	0.864437	0.684803	11	0.968934	0.982836	1	RR	TRUE	trypsin	4	13	1	0.0714286	0.235294
High	[R].qDLEDSLQAQQYFADANEAESWmR.[E]	HCD	1.43	0.0043	0.058	0.109	0.51	1	Sequest HT (2)	3	1021.46	-0.27	102.383	33892	33892	Q13813	ArgAcetylD3	RQDLEDSLQAQQYFADANEAESWMR	25	3	102.383	421	25		N-Term(ArgAcetylD3);M23(Oxidation)	Acetyl:2H(3)@Any N-term;Oxidation@M	0;24	27	QE	0.494391	QDLEDSLQAQQYFADANEAESWMR	0.35853	0.423687	0.278528	-0.0774553	0	NA	0.80614	1	RR	TRUE	trypsin	0	7	25	0.78125	0
High	[R].gPcIIYNEDNGIIkAFR.[N]	HCD	7.06	1.3e-05	1.7e-06	1.82	0.73	1	Sequest HT (2)	3	742.72	-6.73	104.113	34579	34579	P36578	ArgAcetylD3	RGPCIIYNEDNGIIKAFR	18	3	104.113	422	18		N-Term(ArgAcetylD3);C3(Carbamidomethyl);K14(Acetyl:2H(3))	Acetyl:2H(3)@Any N-term;Carbamidomethyl@C;Acetyl:2H(3)@K	0;4;15	27	QE	0.510118	GPCIIYNEDNGIIKAFR	0.987836	0.990124	0.910456	0.798336	18	0.990305	0.986061	1	RR	TRUE	trypsin	5	29	1	0.0333333	0.147059
High	[R].kPkENNFkAVLETIR.[N]	HCD	4.67	5.8e-05	0.00021	0.89	0.59	1	Sequest HT (2)	3	708.417	-0.05	107.395	35877	35877	O60306	ArgAcetylD3	RKPKENNFKAVLETIR	16	3	107.395	423	16		N-Term(ArgAcetylD3);K1(Acetyl:2H(3));K3(Acetyl:2H(3));K8(Acetyl:2H(3))	Acetyl:2H(3)@Any N-term;Acetyl:2H(3)@K;Acetyl:2H(3)@K;Acetyl:2H(3)@K	0;2;4;9	27	QE	0.539955	KPKENNFKAVLETIR	0.982579	0.985929	0.893077	0.663406	11	0.909461	0.995416	1	RR	TRUE	trypsin	2	19	6	0.24	0.0952381
High	[R].lDQVIHSNPAGIQQALAQLSSR.[Q]	HCD	5.5	1.3e-05	1.3e-06	1.87	0.58	1	Sequest HT (2)	3	849.805	6.77	107.787	36031	36031	P48634	ArgAcetylD3	RLDQVIHSNPAGIQQALAQLSSR	23	3	107.787	424	23		N-Term(ArgAcetylD3)	Acetyl:2H(3)@Any N-term	0	27	QE	0.543518	LDQVIHSNPAGIQQALAQLSSR	0.619814	0.70764	0.50048	0.528988	16	0.785816	0.521647	0	FR	TRUE	trypsin	3	28	11	0.282051	0.0967742
High	[R].lPGAIDVIGQTITISR.[V]	HCD	5.18	1.3e-05	6.7e-06	1.56	0.66	1	Sequest HT (2)	3	619.033	-0.28	110.243	37020	37020	Q6UN15	ArgAcetylD3	RLPGAIDVIGQTITISR	17	3	110.243	425	17		N-Term(ArgAcetylD3)	Acetyl:2H(3)@Any N-term	0	27	QE	0.565845	LPGAIDVIGQTITISR	0.997695	0.99796	0.959334	0.908471	12	0.998588	0.996508	1	RR	TRUE	trypsin	1	22	1	0.0434783	0.0434783
High	[R].tEkkLkDVLLQVDDER.[N]	HCD	6.19	1.3e-05	1.1e-06	1.9	0.72	1	Sequest HT (2)	3	755.765	-2.03	111.291	37439	37439	P35579	ArgAcetylD3	RTEKKLKDVLLQVDDER	17	3	111.291	426	17		N-Term(ArgAcetylD3);K3(Acetyl:2H(3));K4(Acetyl:2H(3));K6(Acetyl:2H(3))	Acetyl:2H(3)@Any N-term;Acetyl:2H(3)@K;Acetyl:2H(3)@K;Acetyl:2H(3)@K	0;4;5;7	27	QE	0.575373	TEKKLKDVLLQVDDER	0.951621	0.963897	0.828415	0.757921	15	0.989658	0.930295	1	RR	TRUE	trypsin	5	24	2	0.0769231	0.172414
High	[R].qDLEDSLQAQQYFADANEAESWMR.[E]	HCD	3.46	0.00014	0.00057	0.702	0.57	1	Sequest HT (2)	3	1016.13	1.75	111.692	37597	37597	Q13813	ArgAcetylD3	RQDLEDSLQAQQYFADANEAESWMR	25	3	111.692	427	25		N-Term(ArgAcetylD3)	Acetyl:2H(3)@Any N-term	0	27	QE	0.579018	QDLEDSLQAQQYFADANEAESWMR	0.69578	0.732099	0.522918	0.182522	4	0.100601	0.963737	1	RR	TRUE	trypsin	1	14	19	0.575758	0.0666667
High	[R].gPFELEAFYSDPQGVPYPEAkIGR.[F]	HCD	4.02	1.3e-05	1.8e-06	1.81	0.65	1	Sequest HT (2)	3	971.827	-0.95	112.201	37798	37798	Q92598	ArgAcetylD3	RGPFELEAFYSDPQGVPYPEAKIGR	25	3	112.201	428	25		N-Term(ArgAcetylD3);K21(Acetyl:2H(3))	Acetyl:2H(3)@Any N-term;Acetyl:2H(3)@K	0;22	27	QE	0.583645	GPFELEAFYSDPQGVPYPEAKIGR	0.970528	0.971403	0.847384	0.529002	8	0.893444	0.998461	1	RR	TRUE	trypsin	2	20	9	0.310345	0.0909091
High	[R].lGLSTLGELkQNLSR.[S]	HCD	4.88	1.3e-05	2.1e-09	3.09	0.74	1	Sequest HT (2)	2	938.05	0.16	113.859	38468	38468	O43399	ArgAcetylD3	RLGLSTLGELKQNLSR	16	2	113.859	429	16		N-Term(ArgAcetylD3);K10(Acetyl:2H(3))	Acetyl:2H(3)@Any N-term;Acetyl:2H(3)@K	0;11	27	QE	0.598718	LGLSTLGELKQNLSR	0.886746	0.900419	0.71348	0.770936	3	0.718266	0.932817	1	RR	TRUE	trypsin	0	8	3	0.272727	0
High	[R].lGLSTLGELkQNLSR.[S]	HCD	4.77	1.3e-05	2e-05	1.36	0.73	1	Sequest HT (2)	3	625.703	0.4	114.363	38668	38668	O43399	ArgAcetylD3	RLGLSTLGELKQNLSR	16	3	114.363	430	16		N-Term(ArgAcetylD3);K10(Acetyl:2H(3))	Acetyl:2H(3)@Any N-term;Acetyl:2H(3)@K	0;11	27	QE	0.6033	LGLSTLGELKQNLSR	0.996261	0.997029	0.950915	0.872242	9	0.99266	0.998919	1	RR	TRUE	trypsin	2	20	1	0.047619	0.0909091
High	[R].tEkkLkDVLLQVDDER.[N]	HCD	5.37	1.3e-05	5.8e-09	2.89	0.74	1	Sequest HT (2)	2	1133.15	3.69	114.741	38817	38817	P35579	ArgAcetylD3	RTEKKLKDVLLQVDDER	17	2	114.741	431	17		N-Term(ArgAcetylD3);K3(Acetyl:2H(3));K4(Acetyl:2H(3));K6(Acetyl:2H(3))	Acetyl:2H(3)@Any N-term;Acetyl:2H(3)@K;Acetyl:2H(3)@K;Acetyl:2H(3)@K	0;4;5;7	27	QE	0.606736	TEKKLKDVLLQVDDER	0.92755	0.934457	0.768228	0.694093	8	0.989103	0.90559	1	RR	TRUE	trypsin	4	17	1	0.0555556	0.190476
High	[R].tEkkLkDVLLQVDDER.[N]	HCD	5.86	1.3e-05	3.6e-06	1.68	0.79	1	Sequest HT (2)	3	755.767	0.64	114.759	38824	38824	P35579	ArgAcetylD3	RTEKKLKDVLLQVDDER	17	3	114.759	432	17		N-Term(ArgAcetylD3);K3(Acetyl:2H(3));K4(Acetyl:2H(3));K6(Acetyl:2H(3))	Acetyl:2H(3)@Any N-term;Acetyl:2H(3)@K;Acetyl:2H(3)@K;Acetyl:2H(3)@K	0;4;5;7	27	QE	0.6069	TEKKLKDVLLQVDDER	0.992721	0.994475	0.933048	0.894277	13	0.988257	0.996936	1	RR	TRUE	trypsin	1	24	2	0.0769231	0.04
High	[R].qDLEDSLQAQQYFADANEAESWMR.[E]	HCD	7.06	1.3e-05	4.6e-09	2.94	0.81	1	Sequest HT (2)	3	1016.13	3.34	115.043	38935	38935	Q13813	ArgAcetylD3	RQDLEDSLQAQQYFADANEAESWMR	25	3	115.043	433	25		N-Term(ArgAcetylD3)	Acetyl:2H(3)@Any N-term	0	27	QE	0.609482	QDLEDSLQAQQYFADANEAESWMR	0.974598	0.980295	0.873412	0.778351	18	0.963475	0.98752	1	RR	TRUE	trypsin	2	28	5	0.151515	0.0666667
High	[R].lQQELDDLLVDLDHQR.[Q]	HCD	2.66	0.0006	0.0051	0.375	0.3	1	Sequest HT (2)	3	717.713	-0.02	116.244	39405	39405	P35579	ArgAcetylD3	RLQQELDDLLVDLDHQR	17	3	116.244	434	17		N-Term(ArgAcetylD3)	Acetyl:2H(3)@Any N-term	0	27	QE	0.6204	LQQELDDLLVDLDHQR	0.651694	0.704037	0.497242	0.248168	6	0.979287	0.510604	0	TR	TRUE	trypsin	0	14	19	0.575758	0
High	[R].qDLLAkcDRVDQLTAQLADLAAR.[G]	HCD	2.79	1.3e-05	2e-05	1.36	0.63	1	Sequest HT (2)	3	944.173	-2.86	117.069	39727	39727	P18206	ArgAcetylD3	RQDLLAKCDRVDQLTAQLADLAAR	24	3	117.069	435	24		N-Term(ArgAcetylD3);K6(Acetyl:2H(3));C7(Carbamidomethyl)	Acetyl:2H(3)@Any N-term;Acetyl:2H(3)@K;Carbamidomethyl@C	0;7;8	27	QE	0.6279	QDLLAKCDRVDQLTAQLADLAAR	0.971105	0.973521	0.853172	0.635035	5	0.993613	0.943822	0	YR	TRUE	trypsin	0	11	8	0.421053	0
Low	[R].tGLFSATQTQEVENLVR.[A]	HCD	1.66	0.81	1	-1.49	0.05	1	Sequest HT (2)	2	1047.55	-6.07	117.106	39741	39741	Q8NHQ9	ArgAcetylD3	RTGLFSATQTQEVENLVR	18	2	117.106	436	18		N-Term(ArgAcetylD3)	Acetyl:2H(3)@Any N-term	0	27	QE	0.628236	TGLFSATQTQEVENLVR	0.0943889	0.160273	0.102475	-0.0182272	5	0.324571	0.0563975	1	RR	TRUE	trypsin	6	3	8	0.727273	0.666667
Medium	[R].fLVEEAALPAAAR.[A]	HCD	2.12	0.021	0.32	-0.099	0.5	1	Sequest HT (2)	2	779.943	0.07	118.593	40317	40317	B1AK53	ArgAcetylD3	RFLVEEAALPAAAR	14	2	118.592	437	14		N-Term(ArgAcetylD3)	Acetyl:2H(3)@Any N-term	0	27	QE	0.641745	FLVEEAALPAAAR	0.147997	0.271767	0.175216	-0.146803	5	0.47623	0.0146205	0	LR	TRUE	trypsin	3	6	10	0.625	0.333333
High	[R].lQQELDDLLVDLDHQR.[Q]	HCD	5.81	1.3e-05	2.2e-09	3.07	0.7	1	Sequest HT (2)	3	717.713	0.44	121.389	41396	41396	P35579	ArgAcetylD3	RLQQELDDLLVDLDHQR	17	3	121.389	438	17		N-Term(ArgAcetylD3)	Acetyl:2H(3)@Any N-term	0	27	QE	0.667173	LQQELDDLLVDLDHQR	0.991946	0.993432	0.926994	0.852633	15	0.99167	0.993382	0	TR	TRUE	trypsin	2	30	3	0.0909091	0.0625
High	[R].gGVPSWFGL.[-]	HCD	1.82	0.0039	0.054	0.117	0.71	1	Sequest HT (2)	2	560.803	-0.02	121.895	41588	41588	Q16540	ArgAcetylD3	RGGVPSWFGL	10	2	121.895	439	10		N-Term(ArgAcetylD3)	Acetyl:2H(3)@Any N-term	0	27	QE	0.671773	GGVPSWFGL	0.905823	0.922896	0.748369	0.625611	7	0.869821	0.998911	1	RR	TRUE	trypsin	1	9	3	0.25	0.1
High	[R].lLISkLQDEFENR.[T]	HCD	4.03	0.0001	0.00034	0.801	0.76	1	Sequest HT (2)	3	617.68	0.84	121.974	41619	41619	P78344	ArgAcetylD3	RLLISKLQDEFENR	14	3	121.974	440	14		N-Term(ArgAcetylD3);K5(Acetyl:2H(3))	Acetyl:2H(3)@Any N-term;Acetyl:2H(3)@K	0;6	27	QE	0.672491	LLISKLQDEFENR	0.972349	0.977784	0.865559	0.936438	8	0.962922	0.99121	1	RR	TRUE	trypsin	0	16	1	0.0588235	0
High	[R].vLQALEGLkMVEkDQDGGR.[K]	HCD	5.54	1.3e-05	8.2e-07	1.96	0.75	1	Sequest HT (2)	3	793.101	1.04	122.895	41967	41967	P39019	ArgAcetylD3	RVLQALEGLKMVEKDQDGGR	20	3	122.895	441	20		N-Term(ArgAcetylD3);K9(Acetyl:2H(3));K13(Acetyl:2H(3))	Acetyl:2H(3)@Any N-term;Acetyl:2H(3)@K;Acetyl:2H(3)@K	0;10;14	27	QE	0.680864	VLQALEGLKMVEKDQDGGR	0.970425	0.976782	0.862548	0.865714	15	0.995179	0.962285	1	RR	TRUE	trypsin	1	27	3	0.1	0.0357143
High	[R].gSQGDSkQQNGPPR.[K]	HCD	3.15	0.00025	0.0013	0.559	0.65	1	Sequest HT (2)	3	567.956	-0.15	37.9544	6719	6719	Q96HC4	ArgAcetylD3	RGSQGDSKQQNGPPR	15	3	37.954	442	15		N-Term(ArgAcetylD3);K7(Acetyl:2H(3))	Acetyl:2H(3)@Any N-term;Acetyl:2H(3)@K	0;8	27	QE	-0.0913273	GSQGDSKQQNGPPR	0.828016	0.855555	0.653568	0.707587	5	0.502832	0.976245	1	RR	TRUE	trypsin	0	12	4	0.25	0
High	[R].gSQGDSkQQNGPPR.[K]	HCD	2.52	0.0002	0.00089	0.622	0.63	1	Sequest HT (2)	3	567.955	-0.88	38.4575	6894	6894	Q96HC4	ArgAcetylD3	RGSQGDSKQQNGPPR	15	3	38.458	443	15		N-Term(ArgAcetylD3);K7(Acetyl:2H(3))	Acetyl:2H(3)@Any N-term;Acetyl:2H(3)@K	0;8	27	QE	-0.0867455	GSQGDSKQQNGPPR	0.796193	0.825839	0.618596	0.574607	3	0.338586	0.976135	1	RR	TRUE	trypsin	0	10	6	0.375	0
High	[R].dHDNkQkSDDRGESER.[H]	HCD	4.24	1.3e-05	2.7e-05	1.3	0.61	1	Sequest HT (2)	4	552.514	-1.13	38.708	6983	6983	Q6KC79	ArgAcetylD3	RDHDNKQKSDDRGESER	17	4	38.708	444	17		N-Term(ArgAcetylD3);K5(Acetyl:2H(3));K7(Acetyl:2H(3))	Acetyl:2H(3)@Any N-term;Acetyl:2H(3)@K;Acetyl:2H(3)@K	0;6;8	27	QE	-0.0844727	DHDNKQKSDDRGESER	0.977637	0.981914	0.87874	0.781525	9	0.978667	0.977036	1	RR	TRUE	trypsin	1	20	4	0.166667	0.047619
High	[R].gSQGDSkQQNGPPR.[K]	HCD	0.75	0.0076	0.11	0.039	0.43	1	Sequest HT (2)	3	567.956	0.64	39.2704	7192	7192	Q96HC4	ArgAcetylD3	RGSQGDSKQQNGPPR	15	3	39.27	445	15		N-Term(ArgAcetylD3);K7(Acetyl:2H(3))	Acetyl:2H(3)@Any N-term;Acetyl:2H(3)@K	0;8	27	QE	-0.0793636	GSQGDSKQQNGPPR	0.373055	0.391296	0.255946	-0.149522	0	NA	0.457005	1	RR	TRUE	trypsin	0	1	15	0.9375	0
High	[R].dDNSAANNSANEkER.[H]	HCD	2.54	0.00011	0.00039	0.774	0.65	1	Sequest HT (2)	3	627.625	0.63	39.5336	7290	7290	P78344	ArgAcetylD3	RDDNSAANNSANEKER	16	3	39.534	446	16		N-Term(ArgAcetylD3);K13(Acetyl:2H(3))	Acetyl:2H(3)@Any N-term;Acetyl:2H(3)@K	0;14	27	QE	-0.0769636	DDNSAANNSANEKER	0.967111	0.971473	0.847573	0.61067	4	0.949729	0.986053	1	RR	TRUE	trypsin	0	12	7	0.368421	0
Low	[R].gGGGNFGPGPGSNFR.[G]	HCD	0.5	0.5	1	-0.667	0.02	1	Sequest HT (2)	3	526.921	-6.57	39.8264	7399	7399	P22626	ArgAcetylD3	RGGGGNFGPGPGSNFR	16	3	39.826	447	16		N-Term(ArgAcetylD3)	Acetyl:2H(3)@Any N-term	0	27	QE	-0.0743091	GGGGNFGPGPGSNFR	0.166632	0.204023	0.130804	-0.303056	0	NA	0.202684	0	SR	TRUE	trypsin	0	1	19	0.95	0
High	[R].lQDHGkER.[K]	HCD	2.99	5.8e-05	0.00015	0.958	0.44	1	Sequest HT (2)	3	410.227	-0.12	40.4502	7634	7634	A4D1P6	ArgAcetylD3	RLQDHGKER	9	3	40.45	448	9		N-Term(ArgAcetylD3);K6(Acetyl:2H(3))	Acetyl:2H(3)@Any N-term;Acetyl:2H(3)@K	0;7	27	QE	-0.0686364	LQDHGKER	0.981958	0.985288	0.890664	0.552236	9	0.953277	0.994187	1	RR	TRUE	trypsin	4	12	2	0.142857	0.25
Low	[R].lDAEEAEIR.[Q]	HCD	1.12	0.79	1	-1.27	0.05	1	Sequest HT (2)	3	416.221	1.78	40.9848	7834	7834	Q5VT06	ArgAcetylD3	RLDAEEAEIR	10	3	40.985	449	10		N-Term(ArgAcetylD3)	Acetyl:2H(3)@Any N-term	0	27	QE	-0.0637727	LDAEEAEIR	0.377628	0.429428	0.28257	-0.38018	2	-0.159261	0.555843	1	RR	TRUE	trypsin	2	2	10	0.833333	0.5
High	[R].skTkEAR.[K]	HCD	2.36	0.00022	0.0011	0.584	0.48	1	Sequest HT (2)	2	555.832	-0.05	41.2753	7952	7952	P84098	ArgAcetylD3	RSKTKEAR	8	2	41.275	450	8		N-Term(ArgAcetylD3);K2(Acetyl:2H(3));K4(Acetyl:2H(3))	Acetyl:2H(3)@Any N-term;Acetyl:2H(3)@K;Acetyl:2H(3)@K	0;3;5	27	QE	-0.0611364	SKTKEAR	0.957204	0.964833	0.830665	0.332239	4	0.887745	0.967011	1	RR	TRUE	trypsin	3	7	3	0.3	0.3
High	[R].tGcIGAkHR.[I]	HCD	3.32	7.2e-05	0.00024	0.864	0.44	1	Sequest HT (2)	3	415.897	-0.05	41.6138	8074	8074	P62913	ArgAcetylD3	RTGCIGAKHR	10	3	41.614	451	10		N-Term(ArgAcetylD3);C3(Carbamidomethyl);K7(Acetyl:2H(3))	Acetyl:2H(3)@Any N-term;Carbamidomethyl@C;Acetyl:2H(3)@K	0;4;8	27	QE	-0.0580545	TGCIGAKHR	0.970605	0.976538	0.861823	0.653411	6	0.991066	0.963863	1	RR	TRUE	trypsin	3	14	2	0.125	0.176471
High	[R].gASQAGmTGYGRPR.[Q]	HCD	2.3	0.00049	0.0038	0.409	0.43	1	Sequest HT (2)	3	542.605	0.44	41.7442	8121	8121	Q01995	ArgAcetylD3	RGASQAGMTGYGRPR	15	3	41.744	452	15		N-Term(ArgAcetylD3);M7(Oxidation)	Acetyl:2H(3)@Any N-term;Oxidation@M	0;8	27	QE	-0.0568727	GASQAGMTGYGRPR	0.843566	0.864556	0.6648	0.522112	7	0.885295	0.851531	0	NR	TRUE	trypsin	2	11	5	0.3125	0.153846
Medium	[R].kmSQkGkR.[K]	HCD	0.96	0.031	0.44	-0.148	0.34	1	Sequest HT (2)	2	657.888	-0.55	42.0991	8262	8262	Q15050	ArgAcetylD3	RKMSQKGKR	9	2	42.099	453	9		N-Term(ArgAcetylD3);K1(Acetyl:2H(3));M2(Oxidation);K5(Acetyl:2H(3));K7(Acetyl:2H(3))	Acetyl:2H(3)@Any N-term;Acetyl:2H(3)@K;Oxidation@M;Acetyl:2H(3)@K;Acetyl:2H(3)@K	0;2;3;6;8	27	QE	-0.0536455	KMSQKGKR	0.963582	0.964898	0.830824	0.71206	0	NA	0.996307	1	RR	TRUE	trypsin	0	3	2	0.4	0
High	[R].gGAAAGVEAR.[A]	HCD	2.79	0.00034	0.0019	0.5	0.39	1	Sequest HT (2)	2	530.29	-0.24	42.1136	8268	8268	Q9NZJ7	ArgAcetylD3	RGGAAAGVEAR	11	2	42.114	454	11		N-Term(ArgAcetylD3)	Acetyl:2H(3)@Any N-term	0	27	QE	-0.0535091	GGAAAGVEAR	0.949874	0.954599	0.807433	0.412289	4	0.869524	0.965438	0	AR	TRUE	trypsin	2	7	4	0.363636	0.222222
High	[R].tGcIGAkHR.[I]	HCD	3.93	1.3e-05	5.6e-06	1.59	0.58	1	Sequest HT (2)	3	415.896	-0.78	42.1366	8278	8278	P62913	ArgAcetylD3	RTGCIGAKHR	10	3	42.137	455	10		N-Term(ArgAcetylD3);C3(Carbamidomethyl);K7(Acetyl:2H(3))	Acetyl:2H(3)@Any N-term;Carbamidomethyl@C;Acetyl:2H(3)@K	0;4;8	27	QE	-0.0533	TGCIGAKHR	0.988921	0.990724	0.913221	0.628443	10	0.994218	0.98696	1	RR	TRUE	trypsin	7	15	1	0.0625	0.318182
High	[R].qEAIAQNR.[L]	HCD	1.62	0.0045	0.061	0.104	0.08	1	Sequest HT (2)	2	565.809	0.22	42.3736	8381	8381	Q6P2Q9	ArgAcetylD3	RQEAIAQNR	9	2	42.374	456	9		N-Term(ArgAcetylD3)	Acetyl:2H(3)@Any N-term	0	27	QE	-0.0511455	QEAIAQNR	0.849626	0.863578	0.663564	0.472507	4	0.460089	0.943384	1	KR	TRUE	trypsin	0	9	5	0.357143	0
Medium	[R].gSQGDSkQQNGPPR.[K]	HCD	0.99	0.044	0.56	-0.192	0.74	1	Sequest HT (2)	2	851.43	-0.23	42.4375	8408	8408	Q96HC4	ArgAcetylD3	RGSQGDSKQQNGPPR	15	2	42.438	457	15		N-Term(ArgAcetylD3);K7(Acetyl:2H(3))	Acetyl:2H(3)@Any N-term;Acetyl:2H(3)@K	0;8	27	QE	-0.0505636	GSQGDSKQQNGPPR	0.932463	0.935512	0.770123	0.390055	1	0.955575	0.909371	1	RR	TRUE	trypsin	1	3	6	0.666667	0.25
High	[R].qSDPSIR.[TS]	HCD	2.21	0.0023	0.028	0.186	0.21	1	Sequest HT (2)	2	502.271	-0.23	43.1811	8701	8701	Q9C0D7; Q5HYM0	ArgAcetylD3	RQSDPSIR	8	2	43.181	458	8		N-Term(ArgAcetylD3)	Acetyl:2H(3)@Any N-term	0	27	QE	-0.0438091	QSDPSIR	0.989142	0.990441	0.911906	0.0686918	4	0.979609	0.998078	1	KR;KR	TRUE	trypsin	4	5	3	0.375	0.444444
High	[R].eQQPSVTSR.[S]	HCD	2.61	0.00023	0.0012	0.571	0.46	1	Sequest HT (2)	2	616.825	-0.04	43.2137	8716	8716	P25686	ArgAcetylD3	REQQPSVTSR	10	2	43.214	459	10		N-Term(ArgAcetylD3)	Acetyl:2H(3)@Any N-term	0	27	QE	-0.0435091	EQQPSVTSR	0.902193	0.91431	0.734532	0.0817246	4	0.569001	0.925924	1	RR	TRUE	trypsin	3	5	5	0.5	0.375
Low	[R].tEAAAAAPQR.[S]	HCD	1.49	0.097	0.8	-0.296	0.12	1	Sequest HT (2)	2	593.822	-0.06	43.2174	8718	8718	O95817	ArgAcetylD3	RTEAAAAAPQR	11	2	43.217	460	11		N-Term(ArgAcetylD3)	Acetyl:2H(3)@Any N-term	0	27	QE	-0.0434818	TEAAAAAPQR	0.713292	0.7323	0.523106	-0.0466229	2	0.221674	0.832133	0	FR	TRUE	trypsin	0	4	10	0.714286	0
Medium	[R].dPSVkR.[T]	HCD	1.47	0.016	0.25	-0.069	0.38	1	Sequest HT (2)	2	474.28	-0.42	43.2998	8753	8753	Q9H633	ArgAcetylD3	RDPSVKR	7	2	43.3	461	7		N-Term(ArgAcetylD3);K5(Acetyl:2H(3))	Acetyl:2H(3)@Any N-term;Acetyl:2H(3)@K	0;6	27	QE	-0.0427273	DPSVKR	0.95328	0.962002	0.823941	0.572174	3	0.943929	0.962991	1	RR	TRUE	trypsin	0	8	4	0.333333	0
High	[R].dHFEEAmR.[F]	HCD	2.71	8.3e-05	0.00031	0.816	0.69	1	Sequest HT (2)	3	417.858	-0.82	43.3011	8754	8754	P55072	ArgAcetylD3	RDHFEEAMR	9	3	43.301	462	9		N-Term(ArgAcetylD3);M7(Oxidation)	Acetyl:2H(3)@Any N-term;Oxidation@M	0;8	27	QE	-0.0427182	DHFEEAMR	0.955061	0.96283	0.82588	0.722324	8	0.96151	0.955522	1	RR	TRUE	trypsin	3	12	1	0.0769231	0.2
Low	[R].dHFEEAmR.[F]	HCD	0.59	0.26	0.97	-0.466	0.17	1	Sequest HT (2)	2	626.283	-2.08	43.3192	8761	8761	P55072	ArgAcetylD3	RDHFEEAMR	9	2	43.319	463	9		N-Term(ArgAcetylD3);M7(Oxidation)	Acetyl:2H(3)@Any N-term;Oxidation@M	0;8	27	QE	-0.0425545	DHFEEAMR	0.913858	0.914791	0.735289	-0.115286	1	0.842724	0.99578	1	RR	TRUE	trypsin	1	2	8	0.8	0.333333
High	[R].kkEGPAR.[K]	HCD	1.3	0.0021	0.024	0.203	0.29	1	Sequest HT (2)	2	538.83	0.51	43.3384	8769	8769	Q92508	ArgAcetylD3	RKKEGPAR	8	2	43.338	464	8		N-Term(ArgAcetylD3);K1(Acetyl:2H(3));K2(Acetyl:2H(3))	Acetyl:2H(3)@Any N-term;Acetyl:2H(3)@K;Acetyl:2H(3)@K	0;2;3	27	QE	-0.0423818	KKEGPAR	0.946488	0.94934	0.796493	0.312261	5	0.752257	0.970783	1	RR	TRUE	trypsin	3	7	4	0.363636	0.3
High	[R].tEAAAAAPQR.[S]	HCD	2.45	5e-05	0.0001	1.04	0.52	1	Sequest HT (2)	2	593.822	-0.06	43.7568	8934	8934	O95817	ArgAcetylD3	RTEAAAAAPQR	11	2	43.757	465	11		N-Term(ArgAcetylD3)	Acetyl:2H(3)@Any N-term	0	27	QE	-0.0385727	TEAAAAAPQR	0.909459	0.926645	0.754642	0.541745	5	0.823583	0.954396	0	FR	TRUE	trypsin	1	10	4	0.285714	0.0909091
High	[R].kASDVHEVR.[K]	HCD	3.13	1.3e-05	4.6e-05	1.19	0.62	1	Sequest HT (2)	3	429.574	-0.21	43.7607	8936	8936	P14618	ArgAcetylD3	RKASDVHEVR	10	3	43.761	466	10		N-Term(ArgAcetylD3);K1(Acetyl:2H(3))	Acetyl:2H(3)@Any N-term;Acetyl:2H(3)@K	0;2	27	QE	-0.0385364	KASDVHEVR	0.940766	0.952032	0.802019	0.475547	10	0.99555	0.900053	0	IR	TRUE	trypsin	5	13	2	0.133333	0.277778
High	[R].eNkGATAAPQR.[K]	HCD	1.94	0.00013	0.00053	0.713	0.42	1	Sequest HT (2)	2	694.879	0.24	43.9586	9021	9021	Q9Y2W2	ArgAcetylD3	RENKGATAAPQR	12	2	43.959	467	12		N-Term(ArgAcetylD3);K3(Acetyl:2H(3))	Acetyl:2H(3)@Any N-term;Acetyl:2H(3)@K	0;4	27	QE	-0.0367364	ENKGATAAPQR	0.94717	0.953269	0.80461	0.607893	2	0.931622	0.956104	1	RR	TRUE	trypsin	2	6	2	0.25	0.25
High	[R].kGNYAER.[VI]	HCD	1.66	0.0083	0.12	0.026	0.3	1	Sequest HT (2)	2	542.295	1.02	44.0698	9068	9068	Q16777; Q96QV6; Q8IUE6; Q93077; Q99878; Q96KK5; Q9BTM1; P0C0S8; Q6FI13	ArgAcetylD3	RKGNYAER	8	2	44.07	468	8		N-Term(ArgAcetylD3);K1(Acetyl:2H(3))	Acetyl:2H(3)@Any N-term;Acetyl:2H(3)@K	0;2	27	QE	-0.0357273	KGNYAER	0.955363	0.955856	0.810136	0.331965	4	0.698134	0.974423	0	LR;LR;LR;LR;LR;LR;LR;LR;LR	TRUE	trypsin	0	7	6	0.461538	0
High	[R].eNkGATAAPQR.[K]	HCD	4.44	1.3e-05	2.5e-05	1.31	0.59	1	Sequest HT (2)	3	463.588	-0.5	44.071	9069	9069	Q9Y2W2	ArgAcetylD3	RENKGATAAPQR	12	3	44.071	469	12		N-Term(ArgAcetylD3);K3(Acetyl:2H(3))	Acetyl:2H(3)@Any N-term;Acetyl:2H(3)@K	0;4	27	QE	-0.0357182	ENKGATAAPQR	0.991053	0.993315	0.926349	0.82544	11	0.98803	0.992407	1	RR	TRUE	trypsin	3	18	1	0.0526316	0.142857
High	[R].aGkAEQTGNkR.[S]	HCD	3.6	3.2e-05	8.5e-05	1.08	0.48	1	Sequest HT (2)	2	725.907	-0.04	44.0993	9080	9080	Q5UIP0	ArgAcetylD3	RAGKAEQTGNKR	12	2	44.099	470	12		N-Term(ArgAcetylD3);K3(Acetyl:2H(3));K10(Acetyl:2H(3))	Acetyl:2H(3)@Any N-term;Acetyl:2H(3)@K;Acetyl:2H(3)@K	0;4;11	27	QE	-0.0354636	AGKAEQTGNKR	0.772596	0.80377	0.594352	0.188372	3	-0.125035	0.885695	1	RR	TRUE	trypsin	5	4	3	0.428571	0.555556
High	[R].aGkAEQTGNkR.[S]	HCD	3.66	8.3e-05	0.00027	0.844	0.57	1	Sequest HT (2)	3	484.274	-0.74	44.1189	9088	9088	Q5UIP0	ArgAcetylD3	RAGKAEQTGNKR	12	3	44.119	471	12		N-Term(ArgAcetylD3);K3(Acetyl:2H(3));K10(Acetyl:2H(3))	Acetyl:2H(3)@Any N-term;Acetyl:2H(3)@K;Acetyl:2H(3)@K	0;4;11	27	QE	-0.0352818	AGKAEQTGNKR	0.994959	0.995906	0.942375	0.774982	10	0.993071	0.996866	1	RR	TRUE	trypsin	3	16	1	0.0588235	0.157895
High	[R].eNkGATAAPQR.[K]	HCD	2.91	1.3e-05	4.2e-05	1.22	0.57	1	Sequest HT (2)	2	694.878	-1.43	44.4794	9234	9234	Q9Y2W2	ArgAcetylD3	RENKGATAAPQR	12	2	44.479	472	12		N-Term(ArgAcetylD3);K3(Acetyl:2H(3))	Acetyl:2H(3)@Any N-term;Acetyl:2H(3)@K	0;4	27	QE	-0.0320091	ENKGATAAPQR	0.93399	0.941209	0.780618	0.439958	2	0.927347	0.942834	1	RR	TRUE	trypsin	4	6	2	0.25	0.4
Low	[R].gPPPPPR.[SL]	HCD	0.77	0.73	1	-1.04	0.05	1	Sequest HT (2)	2	459.768	-7.41	46.0388	9899	9899	P38159; Q75N03	ArgAcetylD3	RGPPPPPR	8	2	46.039	473	8		N-Term(ArgAcetylD3)	Acetyl:2H(3)@Any N-term	0	27	QE	-0.0178273	GPPPPPR	0.287051	0.404493	0.265104	-0.465517	1	-0.00943696	0.657171	0.125	PR;LL;QP;RR;QS;MR;RH;VL	TRUE	trypsin	1	3	11	0.785714	0.25
High	[R].kSTLASR.[L]	HCD	2.5	0.0016	0.016	0.244	0.44	1	Sequest HT (2)	2	504.806	-1.37	46.4091	10060	10060	Q8IZ83	ArgAcetylD3	RKSTLASR	8	2	46.409	474	8		N-Term(ArgAcetylD3);K1(Acetyl:2H(3))	Acetyl:2H(3)@Any N-term;Acetyl:2H(3)@K	0;2	27	QE	-0.0144636	KSTLASR	0.884944	0.906459	0.72245	0.477832	4	0.662994	0.895661	1	RR	TRUE	trypsin	1	10	2	0.166667	0.0909091
High	[R].sVEAPTERPGER.[Q]	HCD	2.04	0.00073	0.0063	0.349	0.17	1	Sequest HT (2)	3	510.268	-0.11	47.1514	10384	10384	Q9NWZ8	ArgAcetylD3	RSVEAPTERPGER	13	3	47.151	475	13		N-Term(ArgAcetylD3)	Acetyl:2H(3)@Any N-term	0	27	QE	-0.00771818	SVEAPTERPGER	0.811608	0.831603	0.625153	0.404907	6	0.738955	0.838554	1	RR	TRUE	trypsin	2	10	5	0.333333	0.166667
High	[R].tVQQLR.[LS]	HCD	1.48	0.002	0.022	0.21	0.11	1	Sequest HT (2)	2	473.287	0.19	47.3717	10475	10475	Q9UBI6; P56962	ArgAcetylD3	RTVQQLR	7	2	47.372	476	7		N-Term(ArgAcetylD3)	Acetyl:2H(3)@Any N-term	0	27	QE	-0.00570909	TVQQLR	0.940107	0.94868	0.795161	0.593478	5	0.653286	0.959062	0.5	RR;GR	TRUE	trypsin	0	10	2	0.166667	0
High	[R].nPADPQRIPSNPSHR.[I]	HCD	3.13	0.00035	0.0022	0.484	0.56	1	Sequest HT (2)	4	472.5	0.22	47.7149	10626	10626	Q12805	ArgAcetylD3	RNPADPQRIPSNPSHR	16	4	47.715	477	16		N-Term(ArgAcetylD3)	Acetyl:2H(3)@Any N-term	0	27	QE	-0.00259091	NPADPQRIPSNPSHR	0.918311	0.929679	0.759831	0.465685	7	0.96672	0.85551	1	RR	TRUE	trypsin	1	13	8	0.380952	0.0714286
High	[R].tIkkQR.[K]	HCD	1.72	0.0072	0.1	0.046	0.05	1	Sequest HT (2)	2	532.848	0.18	47.8449	10683	10683	Q00059	ArgAcetylD3	RTIKKQR	7	2	47.845	478	7		N-Term(ArgAcetylD3);K3(Acetyl:2H(3));K4(Acetyl:2H(3))	Acetyl:2H(3)@Any N-term;Acetyl:2H(3)@K;Acetyl:2H(3)@K	0;4;5	27	QE	-0.00140909	TIKKQR	0.741106	0.806749	0.59755	-0.0613043	5	0.20322	0.843051	1	RR	TRUE	trypsin	3	5	5	0.5	0.375
High	[R].gQPASSFSR.[K]	HCD	2.21	0.00036	0.0024	0.469	0.44	1	Sequest HT (2)	2	569.297	2.01	47.9519	10730	10730	Q7KZ85	ArgAcetylD3	RGQPASSFSR	10	2	47.952	479	10		N-Term(ArgAcetylD3)	Acetyl:2H(3)@Any N-term	0	27	QE	-0.000436364	GQPASSFSR	0.884265	0.897412	0.709111	0.0980695	6	0.070185	0.936679	0	DR	TRUE	trypsin	4	7	4	0.363636	0.363636
High	[R].qGGLAGSVR.[I]	HCD	2.7	0.0003	0.0017	0.516	0.45	1	Sequest HT (2)	2	523.301	0.84	48.0855	10789	10789	Q969G5	ArgAcetylD3	RQGGLAGSVR	10	2	48.086	480	10		N-Term(ArgAcetylD3)	Acetyl:2H(3)@Any N-term	0	27	QE	0.000781818	QGGLAGSVR	0.924811	0.932847	0.765367	0.526384	4	0.378029	0.97003	1	RR	TRUE	trypsin	2	8	2	0.2	0.2
High	[R].fSEGTSADR.[E]	HCD	2.13	0.00045	0.0031	0.435	0.35	1	Sequest HT (2)	2	585.782	-1.34	48.4273	10937	10937	P62333	ArgAcetylD3	RFSEGTSADR	10	2	48.427	481	10		N-Term(ArgAcetylD3)	Acetyl:2H(3)@Any N-term	0	27	QE	0.00388182	FSEGTSADR	0.0201351	0.115203	0.0735034	0.13668	5	0.107792	0.0768995	1	RR	TRUE	trypsin	4	6	3	0.333333	0.4
High	[R].lAESSkQDR.[E]	HCD	1.38	0.00058	0.0049	0.379	0.12	1	Sequest HT (2)	2	640.346	-1.52	49.1481	11250	11250	Q9UPT8	ArgAcetylD3	RLAESSKQDR	10	2	49.148	482	10		N-Term(ArgAcetylD3);K6(Acetyl:2H(3))	Acetyl:2H(3)@Any N-term;Acetyl:2H(3)@K	0;7	27	QE	0.0104364	LAESSKQDR	0.941104	0.947307	0.792415	0.531403	3	0.741599	0.968846	1	RR	TRUE	trypsin	1	7	3	0.3	0.125
High	[R].nEVLDR.[W]	HCD	1.73	0.0031	0.041	0.146	0.07	1	Sequest HT (2)	2	473.76	-2.18	49.5294	11419	11419	Q13813	ArgAcetylD3	RNEVLDR	7	2	49.529	483	7		N-Term(ArgAcetylD3)	Acetyl:2H(3)@Any N-term	0	27	QE	0.0139	NEVLDR	0.966637	0.971455	0.847525	0.158696	6	0.61249	0.987747	1	RR	TRUE	trypsin	4	9	2	0.181818	0.307692
High	[R].kEEAWLLNR.[E]	HCD	2.14	0.0051	0.069	0.09	0.27	1	Sequest HT (2)	3	468.932	-2.83	49.7541	11512	11512	Q9UPN4	ArgAcetylD3	RKEEAWLLNR	10	3	49.754	484	10		N-Term(ArgAcetylD3);K1(Acetyl:2H(3))	Acetyl:2H(3)@Any N-term;Acetyl:2H(3)@K	0;2	27	QE	0.0159455	KEEAWLLNR	0.258938	0.397442	0.260204	-0.552381	6	0.782353	0.112676	0	TR	TRUE	trypsin	4	6	12	0.666667	0.4
High	[R].kVGNNLQR.[L]	HCD	1.69	0.0047	0.064	0.099	0.27	1	Sequest HT (2)	2	587.849	-1.06	50.02	11616	11616	O14777	ArgAcetylD3	RKVGNNLQR	9	2	50.02	485	9		N-Term(ArgAcetylD3);K1(Acetyl:2H(3))	Acetyl:2H(3)@Any N-term;Acetyl:2H(3)@K	0;2	27	QE	0.0183636	KVGNNLQR	0.929478	0.93648	0.771873	0.13563	6	0.442271	0.966874	1	RR	TRUE	trypsin	4	7	4	0.363636	0.363636
High	[R].kLESTESR.[S]	HCD	1.97	0.00068	0.0058	0.358	0.34	1	Sequest HT (2)	2	598.331	-0.08	50.6043	11869	11869	P02545	ArgAcetylD3	RKLESTESR	9	2	50.604	486	9		N-Term(ArgAcetylD3);K1(Acetyl:2H(3))	Acetyl:2H(3)@Any N-term;Acetyl:2H(3)@K	0;2	27	QE	0.0236727	KLESTESR	0.976457	0.97997	0.872367	0.67632	3	0.882864	0.989487	1	KR	TRUE	trypsin	0	8	3	0.272727	0
High	[R].kMSQkGkR.[K]	HCD	2.76	7.2e-05	0.00025	0.862	0.45	1	Sequest HT (2)	2	649.891	0.48	50.6159	11873	11873	Q15050	ArgAcetylD3	RKMSQKGKR	9	2	50.616	487	9		N-Term(ArgAcetylD3);K1(Acetyl:2H(3));K5(Acetyl:2H(3));K7(Acetyl:2H(3))	Acetyl:2H(3)@Any N-term;Acetyl:2H(3)@K;Acetyl:2H(3)@K;Acetyl:2H(3)@K	0;2;6;8	27	QE	0.0237818	KMSQKGKR	0.887783	0.904304	0.719219	0.500367	4	0.337969	0.928985	1	RR	TRUE	trypsin	2	7	2	0.222222	0.222222
High	[R].eDPISAGSR.[K]	HCD	2.44	0.0002	0.00091	0.619	0.53	1	Sequest HT (2)	2	566.793	-0.16	50.6831	11902	11902	Q7Z2K8	ArgAcetylD3	REDPISAGSR	10	2	50.683	488	10		N-Term(ArgAcetylD3)	Acetyl:2H(3)@Any N-term	0	27	QE	0.0243909	EDPISAGSR	0.956543	0.961259	0.822216	0.237323	5	0.972937	0.942206	1	RR	TRUE	trypsin	5	8	2	0.2	0.384615
High	[R].mPPPPR.[H]	HCD	1.52	0.0024	0.029	0.182	0.49	1	Sequest HT (2)	2	448.254	0.47	50.8111	11956	11956	Q8IYB3	ArgAcetylD3	RMPPPPR	7	2	50.811	489	7		N-Term(ArgAcetylD3)	Acetyl:2H(3)@Any N-term	0	27	QE	0.0255545	MPPPPR	0.795796	0.860486	0.65968	0.439565	6	0.410223	0.945313	0.333333	HL;RR;TM	TRUE	trypsin	4	10	2	0.166667	0.285714
High	[R].kTEEERQkkEDER.[A]	HCD	3.22	1.3e-05	6.3e-06	1.57	0.43	1	Sequest HT (2)	3	681.028	0.24	50.823	11961	11961	Q08AD1	ArgAcetylD3	RKTEEERQKKEDER	14	3	50.823	490	14		N-Term(ArgAcetylD3);K1(Acetyl:2H(3));K8(Acetyl:2H(3));K9(Acetyl:2H(3))	Acetyl:2H(3)@Any N-term;Acetyl:2H(3)@K;Acetyl:2H(3)@K;Acetyl:2H(3)@K	0;2;9;10	27	QE	0.0256636	KTEEERQKKEDER	0.993121	0.993704	0.928524	0.551225	6	0.995896	0.995071	1	RR	TRUE	trypsin	1	13	6	0.315789	0.0714286
High	[R].lEEAQkQR.[H]	HCD	2.17	0.00012	0.00048	0.732	0.2	1	Sequest HT (2)	2	624.353	0.68	50.9544	12018	12018	Q01970	ArgAcetylD3	RLEEAQKQR	9	2	50.954	491	9		N-Term(ArgAcetylD3);K6(Acetyl:2H(3))	Acetyl:2H(3)@Any N-term;Acetyl:2H(3)@K	0;7	27	QE	0.0268545	LEEAQKQR	0.880933	0.901007	0.714341	0.55132	6	0.521147	0.942367	1	RR	TRUE	trypsin	0	11	4	0.266667	0
High	[R].eVEkAkR.[A]	HCD	2.72	0.00049	0.0038	0.412	0.43	1	Sequest HT (2)	2	575.849	1.27	51.1357	12097	12097	P11021	ArgAcetylD3	REVEKAKR	8	2	51.136	492	8		N-Term(ArgAcetylD3);K4(Acetyl:2H(3));K6(Acetyl:2H(3))	Acetyl:2H(3)@Any N-term;Acetyl:2H(3)@K;Acetyl:2H(3)@K	0;5;7	27	QE	0.0285091	EVEKAKR	0.924982	0.938288	0.775177	0.584291	3	0.494527	0.953789	1	RR	TRUE	trypsin	0	9	3	0.25	0
High	[R].qLDEAkR.[K]	HCD	2.96	0.00021	0.00098	0.605	0.31	1	Sequest HT (2)	2	553.316	0.85	51.234	12139	12139	Q9H9P5	ArgAcetylD3	RQLDEAKR	8	2	51.234	493	8		N-Term(ArgAcetylD3);K6(Acetyl:2H(3))	Acetyl:2H(3)@Any N-term;Acetyl:2H(3)@K	0;7	27	QE	0.0294	QLDEAKR	0.943017	0.954373	0.80695	0.440339	4	0.773016	0.980584	1	RR	TRUE	trypsin	2	8	3	0.272727	0.2
High	[R].vGPSSGDAPEPSSR.[T]	HCD	2.12	0.00043	0.0029	0.446	0.34	1	Sequest HT (2)	2	772.383	2.6	51.5001	12259	12259	Q86V48	ArgAcetylD3	RVGPSSGDAPEPSSR	15	2	51.5	494	15		N-Term(ArgAcetylD3)	Acetyl:2H(3)@Any N-term	0	27	QE	0.0318182	VGPSSGDAPEPSSR	0.986351	0.987331	0.898557	0.540123	3	0.989709	0.984312	1	RR	TRUE	trypsin	1	6	5	0.454545	0.142857
High	[R].lRQPkYPR.[K]	HCD	3.06	0.0045	0.061	0.105	0.51	1	Sequest HT (2)	3	435.267	-0.51	51.6488	12322	12322	P62750	ArgAcetylD3	RLRQPKYPR	9	3	51.649	495	9		N-Term(ArgAcetylD3);K5(Acetyl:2H(3))	Acetyl:2H(3)@Any N-term;Acetyl:2H(3)@K	0;6	27	QE	0.0331727	LRQPKYPR	0.795244	0.846187	0.642215	0.307918	5	0.41561	0.873355	NA	NA	FALSE	trypsin	1	10	5	0.333333	0.0909091
High	[R].eVEkAkR.[A]	HCD	2.02	0.00043	0.0029	0.445	0.34	1	Sequest HT (2)	2	575.848	-0.1	51.6656	12328	12328	P11021	ArgAcetylD3	REVEKAKR	8	2	51.666	496	8		N-Term(ArgAcetylD3);K4(Acetyl:2H(3));K6(Acetyl:2H(3))	Acetyl:2H(3)@Any N-term;Acetyl:2H(3)@K;Acetyl:2H(3)@K	0;5;7	27	QE	0.0333273	EVEKAKR	0.882705	0.907138	0.723475	0.515599	3	0.494187	0.909655	1	RR	TRUE	trypsin	0	8	4	0.333333	0
Low	[R].lDQEkGQTQR.[S]	HCD	1.04	0.61	1	-0.791	0.15	1	Sequest HT (2)	2	724.885	-6.35	51.8803	12424	12424	Q8IXI1	ArgAcetylD3	RLDQEKGQTQR	11	2	51.88	497	11		N-Term(ArgAcetylD3);K5(Acetyl:2H(3))	Acetyl:2H(3)@Any N-term;Acetyl:2H(3)@K	0;6	27	QE	0.0352727	LDQEKGQTQR	0.691837	0.709505	0.502162	0.0258911	2	0.829238	0.741719	1	KR	TRUE	trypsin	0	4	11	0.733333	0
High	[R].gRGTGEAEEEYVGPR.[L]	HCD	3.15	0.00011	0.0004	0.767	0.54	1	Sequest HT (2)	3	603.299	2.85	52.0284	12490	12490	Q13895	ArgAcetylD3	RGRGTGEAEEEYVGPR	16	3	52.028	498	16		N-Term(ArgAcetylD3)	Acetyl:2H(3)@Any N-term	0	27	QE	0.0366182	GRGTGEAEEEYVGPR	0.78793	0.826944	0.619845	0.665574	4	0.534611	0.968572	1	RR	TRUE	trypsin	0	13	5	0.277778	0
High	[R].eYDEETVR.[W]	HCD	1.6	0.0023	0.028	0.186	0.21	1	Sequest HT (2)	2	621.297	2.15	52.138	12540	12540	Q4G0N4	ArgAcetylD3	REYDEETVR	9	2	52.138	499	9		N-Term(ArgAcetylD3)	Acetyl:2H(3)@Any N-term	0	27	QE	0.0376182	EYDEETVR	0.87974	0.871507	0.673713	0.143328	3	0.482743	0.931314	1	RR	TRUE	trypsin	0	7	8	0.533333	0
High	[R].kTLSEETR.[Q]	HCD	2.75	0.00034	0.002	0.496	0.56	1	Sequest HT (2)	2	605.339	0.44	52.1641	12551	12551	Q9NVI7; Q5T9A4	ArgAcetylD3	RKTLSEETR	9	2	52.164	500	9		N-Term(ArgAcetylD3);K1(Acetyl:2H(3))	Acetyl:2H(3)@Any N-term;Acetyl:2H(3)@K	0;2	27	QE	0.0378545	KTLSEETR	0.927649	0.940641	0.77955	0.598607	5	0.871471	0.935615	1	RR;RR	TRUE	trypsin	2	9	2	0.181818	0.181818
High	[R].ekEQFR.[K]	HCD	1.91	0.0033	0.044	0.139	0.29	1	Sequest HT (2)	2	541.797	1.45	52.1967	12565	12565	P22626	ArgAcetylD3	REKEQFR	7	2	52.197	501	7		N-Term(ArgAcetylD3);K2(Acetyl:2H(3))	Acetyl:2H(3)@Any N-term;Acetyl:2H(3)@K	0;3	27	QE	0.0381545	EKEQFR	0.944406	0.943072	0.784155	0.636957	4	0.580687	0.972036	0.25	KR;SD;SE;CE	TRUE	trypsin	0	9	2	0.181818	0
High	[R].qDVDNASLAR.[L]	HCD	2.61	0.00076	0.0068	0.341	0.43	1	Sequest HT (2)	2	645.335	-1.05	52.3278	12620	12620	P08670	ArgAcetylD3	RQDVDNASLAR	11	2	52.328	502	11		N-Term(ArgAcetylD3)	Acetyl:2H(3)@Any N-term	0	27	QE	0.0393455	QDVDNASLAR	0.924878	0.937619	0.773949	0.0893058	5	0.82158	0.962869	0	FR	TRUE	trypsin	4	8	7	0.466667	0.333333
High	[R].ekQLAAENR.[L]	HCD	3.74	1.3e-05	3.3e-05	1.26	0.34	1	Sequest HT (2)	2	652.863	0.53	52.4999	12693	12693	P35579	ArgAcetylD3	REKQLAAENR	10	2	52.5	503	10		N-Term(ArgAcetylD3);K2(Acetyl:2H(3))	Acetyl:2H(3)@Any N-term;Acetyl:2H(3)@K	0;3	27	QE	0.0409091	EKQLAAENR	0.977683	0.981766	0.878243	0.685457	8	0.880508	0.992638	0	VR	TRUE	trypsin	2	13	2	0.133333	0.133333
High	[R].gkSGFNSkSGQR.[G]	HCD	4.13	1.3e-05	1.4e-07	2.29	0.68	1	Sequest HT (2)	2	772.418	0.16	52.5037	12695	12695	P07910	ArgAcetylD3	RGKSGFNSKSGQR	13	2	52.504	504	13		N-Term(ArgAcetylD3);K2(Acetyl:2H(3));K8(Acetyl:2H(3))	Acetyl:2H(3)@Any N-term;Acetyl:2H(3)@K;Acetyl:2H(3)@K	0;3;9	27	QE	0.0409455	GKSGFNSKSGQR	0.780686	0.806792	0.597597	0.613548	4	0.143198	0.871159	1	RR	TRUE	trypsin	2	7	2	0.222222	0.222222
High	[R].gkSGFNSkSGQR.[G]	HCD	5.07	1.3e-05	4.1e-05	1.22	0.65	1	Sequest HT (2)	3	515.282	1.22	52.5077	12697	12697	P07910	ArgAcetylD3	RGKSGFNSKSGQR	13	3	52.508	505	13		N-Term(ArgAcetylD3);K2(Acetyl:2H(3));K8(Acetyl:2H(3))	Acetyl:2H(3)@Any N-term;Acetyl:2H(3)@K;Acetyl:2H(3)@K	0;3;9	27	QE	0.0409818	GKSGFNSKSGQR	0.982211	0.984894	0.889204	0.489742	12	0.976938	0.987718	1	RR	TRUE	trypsin	7	14	2	0.125	0.333333
High	[R].kLEEQAR.[A]	HCD	2.37	0.0002	0.00093	0.615	0.43	1	Sequest HT (2)	2	560.323	0.2	52.7173	12798	12798	Q14247	ArgAcetylD3	RKLEEQAR	8	2	52.717	506	8		N-Term(ArgAcetylD3);K1(Acetyl:2H(3))	Acetyl:2H(3)@Any N-term;Acetyl:2H(3)@K	0;2	27	QE	0.0428818	KLEEQAR	0.934213	0.949122	0.796052	0.61029	5	0.722813	0.965097	1	RR	TRUE	trypsin	1	10	2	0.166667	0.0909091
High	[R].dHFEEAmR.[F]	HCD	2.1	0.003	0.039	0.153	0.45	1	Sequest HT (2)	3	417.859	1.7	52.9253	12894	12894	P55072	ArgAcetylD3	RDHFEEAMR	9	3	52.925	507	9		N-Term(ArgAcetylD3);M7(Oxidation)	Acetyl:2H(3)@Any N-term;Oxidation@M	0;8	27	QE	0.0447727	DHFEEAMR	0.911121	0.92679	0.754887	0.62555	8	0.961256	0.97674	1	RR	TRUE	trypsin	4	12	1	0.0769231	0.25
High	[R].dHFEEAMR.[F]	HCD	3.28	0.00015	0.00065	0.677	0.5	1	Sequest HT (2)	3	412.527	-0.2	52.9455	12902	12902	P55072	ArgAcetylD3	RDHFEEAMR	9	3	52.946	508	9		N-Term(ArgAcetylD3)	Acetyl:2H(3)@Any N-term	0	27	QE	0.0449636	DHFEEAMR	0.970082	0.977071	0.863411	0.682918	7	0.977763	0.969865	1	RR	TRUE	trypsin	2	12	2	0.142857	0.142857
Medium	[R].gkSGFNSkSGQR.[G]	HCD	1.32	0.015	0.23	-0.058	0.24	1	Sequest HT (2)	2	772.42	2.07	53.0499	12945	12945	P07910	ArgAcetylD3	RGKSGFNSKSGQR	13	2	53.05	509	13		N-Term(ArgAcetylD3);K2(Acetyl:2H(3));K8(Acetyl:2H(3))	Acetyl:2H(3)@Any N-term;Acetyl:2H(3)@K;Acetyl:2H(3)@K	0;3;9	27	QE	0.0459091	GKSGFNSKSGQR	0.774017	0.786275	0.575986	0.591348	1	0.344512	0.808354	1	RR	TRUE	trypsin	1	6	3	0.333333	0.142857
High	[R].eTNEPVkTkTR.[T]	HCD	2.9	0.00011	0.00037	0.781	0.66	1	Sequest HT (2)	2	797.447	-1.99	53.1687	12992	12992	P12956	ArgAcetylD3	RETNEPVKTKTR	12	2	53.169	510	12		N-Term(ArgAcetylD3);K7(Acetyl:2H(3));K9(Acetyl:2H(3))	Acetyl:2H(3)@Any N-term;Acetyl:2H(3)@K;Acetyl:2H(3)@K	0;8;10	27	QE	0.0469909	ETNEPVKTKTR	0.919652	0.928557	0.757899	0.305144	3	0.875011	0.934654	0	YR	TRUE	trypsin	3	6	4	0.4	0.333333
High	[R].eTNEPVkTkTR.[T]	HCD	3.71	0.00024	0.0012	0.567	0.7	1	Sequest HT (2)	3	531.967	-1.88	53.2331	13022	13022	P12956	ArgAcetylD3	RETNEPVKTKTR	12	3	53.233	511	12		N-Term(ArgAcetylD3);K7(Acetyl:2H(3));K9(Acetyl:2H(3))	Acetyl:2H(3)@Any N-term;Acetyl:2H(3)@K;Acetyl:2H(3)@K	0;8;10	27	QE	0.0475727	ETNEPVKTKTR	0.994242	0.995138	0.937199	0.816631	5	0.996258	0.994351	0	YR	TRUE	trypsin	0	14	3	0.176471	0
High	[R].kLEEQAR.[A]	HCD	2.31	0.0022	0.026	0.196	0.34	1	Sequest HT (2)	2	560.323	-0.33	53.2478	13028	13028	Q14247	ArgAcetylD3	RKLEEQAR	8	2	53.248	512	8		N-Term(ArgAcetylD3);K1(Acetyl:2H(3))	Acetyl:2H(3)@Any N-term;Acetyl:2H(3)@K	0;2	27	QE	0.0477091	KLEEQAR	0.941371	0.936762	0.772386	0.520525	3	0.737749	0.959428	1	RR	TRUE	trypsin	0	8	4	0.333333	0
High	[R].kSEEIQkR.[F]	HCD	2.42	0.00028	0.0015	0.534	0.38	1	Sequest HT (2)	2	654.881	-2.75	53.3468	13073	13073	Q7L590	ArgAcetylD3	RKSEEIQKR	9	2	53.347	513	9		N-Term(ArgAcetylD3);K1(Acetyl:2H(3));K7(Acetyl:2H(3))	Acetyl:2H(3)@Any N-term;Acetyl:2H(3)@K;Acetyl:2H(3)@K	0;2;8	27	QE	0.0486091	KSEEIQKR	0.951176	0.959804	0.818886	0.710594	5	0.807447	0.969354	1	RR	TRUE	trypsin	0	12	2	0.142857	0
Medium	[R].gGPNYQEGLR.[V]	HCD	1.94	0.027	0.4	-0.132	0.04	1	Sequest HT (2)	2	646.333	0.38	53.3584	13078	13078	P53396	ArgAcetylD3	RGGPNYQEGLR	11	2	53.358	514	11		N-Term(ArgAcetylD3)	Acetyl:2H(3)@Any N-term	0	27	QE	0.0487091	GGPNYQEGLR	0.891575	0.899028	0.711451	0.153377	4	0.546249	0.932089	1	RR	TRUE	trypsin	0	7	10	0.588235	0
High	[R].gGPNYQEGLR.[V]	HCD	1.96	0.0098	0.14	0.003	0.19	1	Sequest HT (2)	3	431.224	0.42	53.3686	13083	13083	P53396	ArgAcetylD3	RGGPNYQEGLR	11	3	53.369	515	11		N-Term(ArgAcetylD3)	Acetyl:2H(3)@Any N-term	0	27	QE	0.0488091	GGPNYQEGLR	0.660978	0.708174	0.500962	0.292026	3	0.0176364	0.958968	1	RR	TRUE	trypsin	2	7	5	0.416667	0.222222
High	[R].aPDQAAEIGSR.[G]	HCD	3.18	8.3e-05	0.00032	0.814	0.38	1	Sequest HT (2)	2	658.344	0.56	53.4364	13113	13113	Q3ZCQ8	ArgAcetylD3	RAPDQAAEIGSR	12	2	53.436	516	12		N-Term(ArgAcetylD3)	Acetyl:2H(3)@Any N-term	0	27	QE	0.0494182	APDQAAEIGSR	0.9082	0.920844	0.744998	0.652784	3	0.915901	0.914824	1	RR	TRUE	trypsin	1	12	3	0.2	0.0769231
High	[R].qDVDNASLAR.[L]	HCD	3.48	1.3e-05	1.9e-05	1.36	0.49	1	Sequest HT (2)	2	645.336	1.06	53.6305	13201	13201	P08670	ArgAcetylD3	RQDVDNASLAR	11	2	53.63	517	11		N-Term(ArgAcetylD3)	Acetyl:2H(3)@Any N-term	0	27	QE	0.0511818	QDVDNASLAR	0.936119	0.948272	0.79434	0.588743	9	0.825687	0.971879	0	FR	TRUE	trypsin	3	13	2	0.133333	0.1875
High	[R].eQLmREEAEQkR.[L]	HCD	2.56	0.00044	0.003	0.442	0.26	1	Sequest HT (2)	3	603.644	-0.23	53.8372	13295	13295	Q14444	ArgAcetylD3	REQLMREEAEQKR	13	3	53.837	518	13		N-Term(ArgAcetylD3);M4(Oxidation);K11(Acetyl:2H(3))	Acetyl:2H(3)@Any N-term;Oxidation@M;Acetyl:2H(3)@K	0;5;12	27	QE	0.0530636	EQLMREEAEQKR	0.914496	0.925485	0.752685	0.488059	2	0.341213	0.967619	1	RR	TRUE	trypsin	3	8	3	0.272727	0.272727
High	[R].lSYNTASNkTR.[L]	HCD	3.37	0.00029	0.0017	0.521	0.52	1	Sequest HT (2)	3	500.939	-1.37	54.1184	13428	13428	P49207	ArgAcetylD3	RLSYNTASNKTR	12	3	54.118	519	12		N-Term(ArgAcetylD3);K9(Acetyl:2H(3))	Acetyl:2H(3)@Any N-term;Acetyl:2H(3)@K	0;10	27	QE	0.0556182	LSYNTASNKTR	0.971267	0.975188	0.857888	0.648132	6	0.892695	0.992829	1	RR	TRUE	trypsin	3	12	2	0.142857	0.2
High	[R].nAEQYkDQADkASTR.[L]	HCD	4.01	5.5e-05	0.00014	0.973	0.57	1	Sequest HT (2)	3	672.674	-0.24	54.2612	13492	13492	P35579	ArgAcetylD3	RNAEQYKDQADKASTR	16	3	54.261	520	16		N-Term(ArgAcetylD3);K6(Acetyl:2H(3));K11(Acetyl:2H(3))	Acetyl:2H(3)@Any N-term;Acetyl:2H(3)@K;Acetyl:2H(3)@K	0;7;12	27	QE	0.0569182	NAEQYKDQADKASTR	0.853002	0.879968	0.684873	0.523534	6	0.572592	0.955252	1	RR	TRUE	trypsin	4	16	4	0.2	0.2
High	[R].cESkkFGGPGAR.[A]	HCD	2.55	0.00034	0.0019	0.502	0.43	1	Sequest HT (2)	3	528.947	0.17	54.2797	13500	13500	P62249	ArgAcetylD3	RCESKKFGGPGAR	13	3	54.28	521	13		N-Term(ArgAcetylD3);C1(Carbamidomethyl);K4(Acetyl:2H(3));K5(Acetyl:2H(3))	Acetyl:2H(3)@Any N-term;Carbamidomethyl@C;Acetyl:2H(3)@K;Acetyl:2H(3)@K	0;2;5;6	27	QE	0.0570909	CESKKFGGPGAR	0.990384	0.991189	0.91543	0.716945	3	0.932914	0.994374	1	RR	TRUE	trypsin	1	11	3	0.214286	0.0833333
High	[R].nEkIAVHcTVR.[G]	HCD	3.93	0.0002	0.00085	0.63	0.6	1	Sequest HT (2)	3	524.957	0.71	54.7406	13706	13706	P62913	ArgAcetylD3	RNEKIAVHCTVR	12	3	54.741	522	12		N-Term(ArgAcetylD3);K3(Acetyl:2H(3));C8(Carbamidomethyl)	Acetyl:2H(3)@Any N-term;Acetyl:2H(3)@K;Carbamidomethyl@C	0;4;9	27	QE	0.0612818	NEKIAVHCTVR	0.98333	0.987716	0.900111	0.776392	9	0.982562	0.983747	1	RR	TRUE	trypsin	1	18	3	0.142857	0.0526316
High	[R].gGPNYQEGLR.[V]	HCD	3.12	2.3e-05	5.6e-05	1.16	0.33	1	Sequest HT (2)	2	646.334	1.55	54.8852	13775	13775	P53396	ArgAcetylD3	RGGPNYQEGLR	11	2	54.885	523	11		N-Term(ArgAcetylD3)	Acetyl:2H(3)@Any N-term	0	27	QE	0.0625909	GGPNYQEGLR	0.895746	0.915209	0.735949	0.577674	7	0.596996	0.928937	1	RR	TRUE	trypsin	2	15	2	0.117647	0.117647
High	[R].nEPIkYQR.[E]	HCD	2.28	0.0097	0.14	0.004	0.2	1	Sequest HT (2)	2	647.363	0.5	55.2511	13943	13943	Q9UHA3	ArgAcetylD3	RNEPIKYQR	9	2	55.251	524	9		N-Term(ArgAcetylD3);K5(Acetyl:2H(3))	Acetyl:2H(3)@Any N-term;Acetyl:2H(3)@K	0;6	27	QE	0.0659182	NEPIKYQR	0.940787	0.943152	0.78431	0.333211	4	0.72386	0.969943	1	RR	TRUE	trypsin	0	8	7	0.466667	0
High	[R].gkGkSkGkGVGSAR.[K]	HCD	3.25	3.2e-05	7.9e-05	1.09	0.73	1	Sequest HT (2)	3	566.679	0.08	55.4547	14035	14035	Q92785	ArgAcetylD3	RGKGKSKGKGVGSAR	15	3	55.455	525	15		N-Term(ArgAcetylD3);K2(Acetyl:2H(3));K4(Acetyl:2H(3));K6(Acetyl:2H(3));K8(Acetyl:2H(3))	Acetyl:2H(3)@Any N-term;Acetyl:2H(3)@K;Acetyl:2H(3)@K;Acetyl:2H(3)@K;Acetyl:2H(3)@K	0;3;5;7;9	27	QE	0.0677727	GKGKSKGKGVGSAR	0.996699	0.997035	0.95096	0.835099	6	0.959102	0.998863	1	RR	TRUE	trypsin	1	17	2	0.105263	0.0555556
High	[R].gkGkSkGkGVGSAR.[K]	HCD	1.92	0.00021	0.00099	0.605	0.66	1	Sequest HT (2)	2	849.515	-0.27	55.4611	14038	14038	Q92785	ArgAcetylD3	RGKGKSKGKGVGSAR	15	2	55.461	526	15		N-Term(ArgAcetylD3);K2(Acetyl:2H(3));K4(Acetyl:2H(3));K6(Acetyl:2H(3));K8(Acetyl:2H(3))	Acetyl:2H(3)@Any N-term;Acetyl:2H(3)@K;Acetyl:2H(3)@K;Acetyl:2H(3)@K;Acetyl:2H(3)@K	0;3;5;7;9	27	QE	0.0678273	GKGKSKGKGVGSAR	0.960274	0.961621	0.823055	0.753486	0	NA	0.960871	1	RR	TRUE	trypsin	0	5	3	0.375	0
Low	[R].eEEmMIR.[Q]	HCD	1.93	0.074	0.73	-0.26	0.2	1	Sequest HT (2)	2	577.771	-1.51	55.6253	14117	14117	P23246	ArgAcetylD3	REEEMMIR	8	2	55.625	527	8		N-Term(ArgAcetylD3);M4(Oxidation)	Acetyl:2H(3)@Any N-term;Oxidation@M	0;5	27	QE	0.0693182	EEEMMIR	0.982149	0.983656	0.884743	0.593049	4	0.636098	0.998054	1	RR	TRUE	trypsin	1	7	2	0.222222	0.125
High	[R].gPAYGLSR.[E]	HCD	1.3	0.0023	0.027	0.189	0.38	1	Sequest HT (2)	2	511.285	0.55	55.6676	14135	14135	P37802	ArgAcetylD3	RGPAYGLSR	9	2	55.668	528	9		N-Term(ArgAcetylD3)	Acetyl:2H(3)@Any N-term	0	27	QE	0.0697091	GPAYGLSR	0.851141	0.875922	0.679492	0.447214	6	0.364956	0.931935	0	NR	TRUE	trypsin	1	11	4	0.266667	0.0833333
Low	[R].eEEMmIR.[Q]	HCD	1.59	0.07	0.71	-0.253	0.19	1	Sequest HT (2)	2	577.772	0.3	56.2972	14436	14436	P23246	ArgAcetylD3	REEEMMIR	8	2	56.297	529	8		N-Term(ArgAcetylD3);M5(Oxidation)	Acetyl:2H(3)@Any N-term;Oxidation@M	0;6	27	QE	0.0754273	EEEMMIR	0.950966	0.956656	0.811877	0.515052	4	0.673802	0.997249	1	RR	TRUE	trypsin	0	6	4	0.4	0
High	[R].iIkETQR.[L]	HCD	2.21	0.00034	0.002	0.495	0.38	1	Sequest HT (2)	2	567.349	-0.03	58.6041	15513	15513	P61088; Q5JXB2	ArgAcetylD3	RIIKETQR	8	2	58.604	530	8		N-Term(ArgAcetylD3);K3(Acetyl:2H(3))	Acetyl:2H(3)@Any N-term;Acetyl:2H(3)@K	0;4	27	QE	0.0964	IIKETQR	0.888298	0.914609	0.735002	0.411056	3	0.465625	0.939718	0.5	HR;RR	TRUE	trypsin	1	9	4	0.307692	0.1
High	[R].lSYNTASNkTR.[L]	HCD	3.72	1.3e-05	2.3e-05	1.33	0.53	1	Sequest HT (2)	2	750.905	-0.56	59.0509	15723	15723	P49207	ArgAcetylD3	RLSYNTASNKTR	12	2	59.051	531	12		N-Term(ArgAcetylD3);K9(Acetyl:2H(3))	Acetyl:2H(3)@Any N-term;Acetyl:2H(3)@K	0;10	27	QE	0.100464	LSYNTASNKTR	0.880535	0.893936	0.704134	0.311698	4	0.013675	0.942726	1	RR	TRUE	trypsin	4	7	3	0.3	0.363636
High	[R].iIkETQR.[L]	HCD	2.08	0.00039	0.0027	0.454	0.28	1	Sequest HT (2)	2	567.349	0.08	59.1302	15757	15757	P61088; Q5JXB2	ArgAcetylD3	RIIKETQR	8	2	59.13	532	8		N-Term(ArgAcetylD3);K3(Acetyl:2H(3))	Acetyl:2H(3)@Any N-term;Acetyl:2H(3)@K	0;4	27	QE	0.101182	IIKETQR	0.926458	0.940097	0.778532	0.524083	4	0.520161	0.967013	0.5	HR;RR	TRUE	trypsin	1	10	3	0.230769	0.0909091
High	[R].lSYNTASNkTR.[L]	HCD	3.76	0.00015	0.00067	0.672	0.57	1	Sequest HT (2)	3	500.94	0.8	59.1398	15763	15763	P49207	ArgAcetylD3	RLSYNTASNKTR	12	3	59.14	533	12		N-Term(ArgAcetylD3);K9(Acetyl:2H(3))	Acetyl:2H(3)@Any N-term;Acetyl:2H(3)@K	0;10	27	QE	0.101273	LSYNTASNKTR	0.979301	0.982635	0.881187	0.858633	7	0.985389	0.978775	1	RR	TRUE	trypsin	1	13	1	0.0714286	0.0714286
Medium	[R].gDDSFGDkYRDR.[Y]	HCD	2.01	0.026	0.38	-0.126	0.5	1	Sequest HT (2)	3	559.6	-3.02	59.7931	16053	16053	P23588	ArgAcetylD3	RGDDSFGDKYRDR	13	3	59.793	534	13		N-Term(ArgAcetylD3);K8(Acetyl:2H(3))	Acetyl:2H(3)@Any N-term;Acetyl:2H(3)@K	0;9	27	QE	0.107209	GDDSFGDKYRDR	0.870412	0.888402	0.696369	0.311387	5	0.729363	0.904769	1	RR	TRUE	trypsin	2	10	7	0.411765	0.166667
High	[R].gGNRFEPYANPTkR.[Y]	HCD	2.3	0.00069	0.006	0.356	0.4	1	Sequest HT (2)	3	618.328	0.86	60.2731	16268	16268	P52272	ArgAcetylD3	RGGNRFEPYANPTKR	15	3	60.273	535	15		N-Term(ArgAcetylD3);K13(Acetyl:2H(3))	Acetyl:2H(3)@Any N-term;Acetyl:2H(3)@K	0;14	27	QE	0.111573	GGNRFEPYANPTKR	0.929772	0.938235	0.775079	0.680861	6	0.922289	0.934687	1	KR	TRUE	trypsin	0	13	5	0.277778	0
High	[R].eQLMREEAEQkR.[L]	HCD	2.43	6.5e-05	0.00023	0.878	0.38	1	Sequest HT (2)	3	598.313	0.74	60.5763	16400	16400	Q14444	ArgAcetylD3	REQLMREEAEQKR	13	3	60.576	536	13		N-Term(ArgAcetylD3);K11(Acetyl:2H(3))	Acetyl:2H(3)@Any N-term;Acetyl:2H(3)@K	0;12	27	QE	0.114327	EQLMREEAEQKR	0.830437	0.853578	0.651144	0.370658	3	0.460589	0.880428	1	RR	TRUE	trypsin	0	12	9	0.428571	0
High	[R].eQLmREEAEQkR.[L]	HCD	2.22	0.00044	0.0029	0.443	0.27	1	Sequest HT (2)	3	603.644	-0.34	60.7151	16460	16460	Q14444	ArgAcetylD3	REQLMREEAEQKR	13	3	60.715	537	13		N-Term(ArgAcetylD3);M4(Oxidation);K11(Acetyl:2H(3))	Acetyl:2H(3)@Any N-term;Oxidation@M;Acetyl:2H(3)@K	0;5;12	27	QE	0.115591	EQLMREEAEQKR	0.672401	0.710824	0.503356	0.552974	1	-0.0628751	0.992753	1	RR	TRUE	trypsin	1	7	4	0.363636	0.125
Low	[R].eQLMREEAEQkR.[L]	HCD	1.22	0.32	0.99	-0.509	0.24	1	Sequest HT (2)	2	896.967	1.56	60.7604	16482	16482	Q14444	ArgAcetylD3	REQLMREEAEQKR	13	2	60.76	538	13		N-Term(ArgAcetylD3);K11(Acetyl:2H(3))	Acetyl:2H(3)@Any N-term;Acetyl:2H(3)@K	0;12	27	QE	0.116	EQLMREEAEQKR	0.834123	0.845518	0.641416	0.300858	1	-0.0616242	0.908862	1	RR	TRUE	trypsin	2	3	5	0.625	0.4
High	[R].aQLPkYQR.[N]	HCD	3.39	0.00028	0.0015	0.534	0.55	1	Sequest HT (2)	2	625.365	-3.67	61.2494	16699	16699	O43670	ArgAcetylD3	RAQLPKYQR	9	2	61.249	539	9		N-Term(ArgAcetylD3);K5(Acetyl:2H(3))	Acetyl:2H(3)@Any N-term;Acetyl:2H(3)@K	0;6	27	QE	0.120445	AQLPKYQR	0.908786	0.927173	0.755537	0.374084	7	0.56086	0.950087	1	RR	TRUE	trypsin	4	11	2	0.153846	0.266667
High	[R].dVYLSPR.[D]	HCD	3.23	0.00029	0.0016	0.525	0.45	1	Sequest HT (2)	2	525.792	-0.51	61.3975	16765	16765	P38159; Q96E39	ArgAcetylD3	RDVYLSPR	8	2	61.398	540	8		N-Term(ArgAcetylD3)	Acetyl:2H(3)@Any N-term	0	27	QE	0.1218	DVYLSPR	0.922633	0.943364	0.784715	0.522715	6	0.726268	0.952943	1	RR;RR	TRUE	trypsin	2	10	2	0.166667	0.166667
High	[R].qPkTPLEkR.[D]	HCD	2.7	0.00047	0.0035	0.421	0.22	1	Sequest HT (2)	2	694.42	-2.9	61.4544	16793	16793	P46013	ArgAcetylD3	RQPKTPLEKR	10	2	61.454	541	10		N-Term(ArgAcetylD3);K3(Acetyl:2H(3));K8(Acetyl:2H(3))	Acetyl:2H(3)@Any N-term;Acetyl:2H(3)@K;Acetyl:2H(3)@K	0;4;9	27	QE	0.122309	QPKTPLEKR	0.86304	0.888497	0.6965	0.461776	5	0.168087	0.98556	1	RR	TRUE	trypsin	2	9	3	0.25	0.181818
High	[R].qYEEkNkEFER.[E]	HCD	2.95	0.00028	0.0015	0.534	0.47	1	Sequest HT (2)	3	597.638	-1.16	61.6315	16877	16877	Q32MZ4	ArgAcetylD3	RQYEEKNKEFER	12	3	61.632	542	12		N-Term(ArgAcetylD3);K5(Acetyl:2H(3));K7(Acetyl:2H(3))	Acetyl:2H(3)@Any N-term;Acetyl:2H(3)@K;Acetyl:2H(3)@K	0;6;8	27	QE	0.123927	QYEEKNKEFER	0.982131	0.985693	0.892183	0.84926	6	0.92813	0.993001	1	RR	TRUE	trypsin	0	14	2	0.125	0
High	[R].eEEGLQLR.[K]	HCD	2.24	0.00025	0.0013	0.564	0	1	Sequest HT (2)	2	587.816	-0.47	61.6607	16890	16890	P52294	ArgAcetylD3	REEEGLQLR	9	2	61.661	543	9		N-Term(ArgAcetylD3)	Acetyl:2H(3)@Any N-term	0	27	QE	0.124191	EEEGLQLR	0.96197	0.963709	0.827966	0.580279	6	0.824453	0.975698	1	RR	TRUE	trypsin	0	10	4	0.285714	0
High	[R].gIEkLR.[V]	HCD	2.06	0.0028	0.036	0.159	0.11	1	Sequest HT (2)	2	481.306	-0.68	61.7543	16932	16932	P49454	ArgAcetylD3	RGIEKLR	7	2	61.754	544	7		N-Term(ArgAcetylD3);K4(Acetyl:2H(3))	Acetyl:2H(3)@Any N-term;Acetyl:2H(3)@K	0;5	27	QE	0.125036	GIEKLR	0.864244	0.894843	0.705426	0.236087	6	0.510715	0.90532	1	RR	TRUE	trypsin	4	8	2	0.2	0.333333
High	[R].vEILNEHRGEkLNR.[V]	HCD	3.86	0.00029	0.0016	0.524	0.55	1	Sequest HT (2)	4	489.026	-4.7	62.1048	17062	17062	Q9NTJ3	ArgAcetylD3	RVEILNEHRGEKLNR	15	4	62.105	545	15		N-Term(ArgAcetylD3);K11(Acetyl:2H(3))	Acetyl:2H(3)@Any N-term;Acetyl:2H(3)@K	0;12	27	QE	0.128227	VEILNEHRGEKLNR	0.986201	0.988129	0.901812	0.818763	6	0.993664	0.973035	1	RR	TRUE	trypsin	2	15	1	0.0625	0.117647
High	[R].iPVSPEQAR.[S]	HCD	2.42	0.00057	0.0048	0.381	0.52	1	Sequest HT (2)	2	599.342	-0.67	62.7495	17313	17313	Q9H981	ArgAcetylD3	RIPVSPEQAR	10	2	62.749	546	10		N-Term(ArgAcetylD3)	Acetyl:2H(3)@Any N-term	0	27	QE	0.134082	IPVSPEQAR	0.774598	0.815196	0.606741	0.497297	4	0.287125	0.915449	1	RR	TRUE	trypsin	0	9	5	0.357143	0
High	[R].lGDDEDREPSLRPDDDRVPR.[G]	HCD	3.81	0.0024	0.029	0.183	0.57	1	Sequest HT (2)	5	511.456	0.8	62.877	17367	17367	Q14152	ArgAcetylD3	RLGDDEDREPSLRPDDDRVPR	21	5	62.877	547	21		N-Term(ArgAcetylD3)	Acetyl:2H(3)@Any N-term	0	27	QE	0.135245	LGDDEDREPSLRPDDDRVPR	0.962248	0.962787	0.82578	0.706247	6	0.598228	0.995979	1	RR	TRUE	trypsin	0	12	5	0.294118	0
High	[R].kEEkQQEANLkNR.[Q]	HCD	4.48	1.3e-05	1.4e-08	2.72	0.59	1	Sequest HT (2)	2	976.043	1.69	63.002	17425	17425	Q8N954	ArgAcetylD3	RKEEKQQEANLKNR	14	2	63.002	548	14		N-Term(ArgAcetylD3);K1(Acetyl:2H(3));K4(Acetyl:2H(3));K11(Acetyl:2H(3))	Acetyl:2H(3)@Any N-term;Acetyl:2H(3)@K;Acetyl:2H(3)@K;Acetyl:2H(3)@K	0;2;5;12	27	QE	0.136382	KEEKQQEANLKNR	0.877005	0.891036	0.700042	0.769145	5	0.73162	0.916428	1	RR	TRUE	trypsin	3	10	0	0	0.230769
High	[R].kEEkQQEANLkNR.[Q]	HCD	6.57	1.3e-05	3.5e-06	1.68	0.61	1	Sequest HT (2)	3	651.03	0.59	63.0079	17428	17428	Q8N954	ArgAcetylD3	RKEEKQQEANLKNR	14	3	63.008	549	14		N-Term(ArgAcetylD3);K1(Acetyl:2H(3));K4(Acetyl:2H(3));K11(Acetyl:2H(3))	Acetyl:2H(3)@Any N-term;Acetyl:2H(3)@K;Acetyl:2H(3)@K;Acetyl:2H(3)@K	0;2;5;12	27	QE	0.136436	KEEKQQEANLKNR	0.987989	0.99112	0.915099	0.820584	13	0.989873	0.986785	1	RR	TRUE	trypsin	3	20	1	0.047619	0.130435
High	[R].qVLAAkER.[H]	HCD	1.42	0.00097	0.0092	0.307	0.39	1	Sequest HT (2)	2	580.854	-0.4	63.4045	17608	17608	O43399	ArgAcetylD3	RQVLAAKER	9	2	63.404	550	9		N-Term(ArgAcetylD3);K6(Acetyl:2H(3))	Acetyl:2H(3)@Any N-term;Acetyl:2H(3)@K	0;7	27	QE	0.140036	QVLAAKER	0.725053	0.765154	0.554675	0.362353	4	-0.0718544	0.965036	0	LR	TRUE	trypsin	2	8	3	0.272727	0.2
High	[R].qLIVPPHLAHGESGAR.[G]	HCD	4.57	1.3e-05	9.3e-06	1.5	0.73	1	Sequest HT (2)	4	471.516	0.01	63.4902	17646	17646	Q96AY3	ArgAcetylD3	RQLIVPPHLAHGESGAR	17	4	63.49	551	17		N-Term(ArgAcetylD3)	Acetyl:2H(3)@Any N-term	0	27	QE	0.140818	QLIVPPHLAHGESGAR	0.990534	0.99228	0.920845	0.798489	5	0.992184	0.987649	1	RR	TRUE	trypsin	2	18	2	0.1	0.1
High	[R].amTkDNNLLGR.[F]	HCD	1.75	0.00083	0.0075	0.329	0.43	1	Sequest HT (2)	2	747.902	0.85	63.8901	17828	17828	P0DMV9; P17066; P34931	ArgAcetylD3	RAMTKDNNLLGR	12	2	63.89	552	12		N-Term(ArgAcetylD3);M2(Oxidation);K4(Acetyl:2H(3))	Acetyl:2H(3)@Any N-term;Oxidation@M;Acetyl:2H(3)@K	0;3;5	27	QE	0.144455	AMTKDNNLLGR	0.819119	0.840247	0.63518	0.603383	3	0.0367266	0.948322	0	ER;ER;ER;ER	TRUE	trypsin	2	8	2	0.2	0.2
High	[R].amTkDNNLLGR.[F]	HCD	3.96	0.00038	0.0026	0.46	0.54	1	Sequest HT (2)	3	498.936	-1.37	64.0304	17891	17891	P0DMV9; P17066; P34931	ArgAcetylD3	RAMTKDNNLLGR	12	3	64.03	553	12		N-Term(ArgAcetylD3);M2(Oxidation);K4(Acetyl:2H(3))	Acetyl:2H(3)@Any N-term;Oxidation@M;Acetyl:2H(3)@K	0;3;5	27	QE	0.145727	AMTKDNNLLGR	0.897726	0.916725	0.738354	0.572727	7	0.620516	0.906859	0	ER;ER;ER;ER	TRUE	trypsin	2	13	4	0.235294	0.133333
High	[R].lGDDEDREPSLRPDDDRVPR.[G]	HCD	4.44	0.0022	0.026	0.194	0.54	1	Sequest HT (2)	5	511.456	0.89	64.0538	17901	17901	Q14152	ArgAcetylD3	RLGDDEDREPSLRPDDDRVPR	21	5	64.054	554	21		N-Term(ArgAcetylD3)	Acetyl:2H(3)@Any N-term	0	27	QE	0.145945	LGDDEDREPSLRPDDDRVPR	0.960249	0.961555	0.822902	0.653399	7	0.567339	0.994698	1	RR	TRUE	trypsin	1	12	5	0.294118	0.0769231
High	[R].nLSADQWR.[N]	HCD	2.05	0.0017	0.018	0.234	0.41	1	Sequest HT (2)	2	595.808	-1.77	64.2954	18007	18007	Q9Y2A7	ArgAcetylD3	RNLSADQWR	9	2	64.295	555	9		N-Term(ArgAcetylD3)	Acetyl:2H(3)@Any N-term	0	27	QE	0.148136	NLSADQWR	0.941479	0.946627	0.791067	0.321298	4	0.946033	0.961378	1	RR	TRUE	trypsin	2	9	5	0.357143	0.181818
High	[R].nAEQYkDQADkASTR.[L]	HCD	4.29	0.00011	0.00038	0.775	0.47	1	Sequest HT (2)	3	672.678	4.68	64.3642	18038	18038	P35579	ArgAcetylD3	RNAEQYKDQADKASTR	16	3	64.364	556	16		N-Term(ArgAcetylD3);K6(Acetyl:2H(3));K11(Acetyl:2H(3))	Acetyl:2H(3)@Any N-term;Acetyl:2H(3)@K;Acetyl:2H(3)@K	0;7;12	27	QE	0.148764	NAEQYKDQADKASTR	0.92046	0.938038	0.774717	0.725702	7	0.986178	0.89836	1	RR	TRUE	trypsin	2	17	3	0.15	0.105263
High	[R].eEEMMIR.[Q]	HCD	2.71	0.0002	0.00081	0.638	0.39	1	Sequest HT (2)	2	569.775	1.06	64.5203	18109	18109	P23246	ArgAcetylD3	REEEMMIR	8	2	64.52	557	8		N-Term(ArgAcetylD3)	Acetyl:2H(3)@Any N-term	0	27	QE	0.150182	EEEMMIR	0.969309	0.974808	0.8568	0.724959	5	0.901297	0.982123	1	RR	TRUE	trypsin	0	11	2	0.153846	0
High	[R].tLEEkEQEEAR.[L]	HCD	4.01	1.3e-05	6.6e-07	2	0.57	1	Sequest HT (2)	2	804.411	-0.1	64.5449	18119	18119	Q9BUQ8	ArgAcetylD3	RTLEEKEQEEAR	12	2	64.545	558	12		N-Term(ArgAcetylD3);K5(Acetyl:2H(3))	Acetyl:2H(3)@Any N-term;Acetyl:2H(3)@K	0;6	27	QE	0.150409	TLEEKEQEEAR	0.942508	0.957092	0.812833	0.71198	9	0.872844	0.965953	1	RR	TRUE	trypsin	1	16	3	0.157895	0.0588235
Medium	[R].eEEMmIR.[Q]	HCD	1.81	0.04	0.54	-0.182	0.04	1	Sequest HT (2)	2	577.772	0.16	64.5831	18138	18138	P23246	ArgAcetylD3	REEEMMIR	8	2	64.583	559	8		N-Term(ArgAcetylD3);M5(Oxidation)	Acetyl:2H(3)@Any N-term;Oxidation@M	0;6	27	QE	0.150755	EEEMMIR	0.952625	0.955542	0.809456	0.331418	5	0.36958	0.996598	1	RR	TRUE	trypsin	1	6	4	0.4	0.142857
High	[R].vcTTAGGVPVTRPPDDSTSAPR.[D]	HCD	2.85	5.5e-05	0.00015	0.964	0.5	1	Sequest HT (2)	3	814.745	-1.23	64.6181	18154	18154	Q02388	ArgAcetylD3	RVCTTAGGVPVTRPPDDSTSAPR	23	3	64.618	560	23		N-Term(ArgAcetylD3);C2(Carbamidomethyl)	Acetyl:2H(3)@Any N-term;Carbamidomethyl@C	0;3	27	QE	0.151073	VCTTAGGVPVTRPPDDSTSAPR	0.936506	0.943928	0.785801	0.71085	5	0.931531	0.942035	1	RR	TRUE	trypsin	0	12	6	0.333333	0
High	[R].tkTEISEMNRNISR.[L]	HCD	3.85	1.3e-05	1.4e-07	2.29	0.5	1	Sequest HT (2)	3	642.343	-0.49	65.0657	18357	18357	P05787	ArgAcetylD3	RTKTEISEMNRNISR	15	3	65.066	561	15		N-Term(ArgAcetylD3);K2(Acetyl:2H(3))	Acetyl:2H(3)@Any N-term;Acetyl:2H(3)@K	0;3	27	QE	0.155145	TKTEISEMNRNISR	0.909657	0.925745	0.753122	0.676384	9	0.941365	0.904103	1	RR	TRUE	trypsin	3	14	2	0.125	0.176471
High	[R].qEAPkVEEGLR.[E]	HCD	3.31	5.8e-05	0.00018	0.924	0.55	1	Sequest HT (2)	2	751.415	-1.06	65.1594	18400	18400	Q9NWM3	ArgAcetylD3	RQEAPKVEEGLR	12	2	65.159	562	12		N-Term(ArgAcetylD3);K5(Acetyl:2H(3))	Acetyl:2H(3)@Any N-term;Acetyl:2H(3)@K	0;6	27	QE	0.155991	QEAPKVEEGLR	0.916548	0.922	0.746891	0.557223	4	0.71382	0.95444	1	RR	TRUE	trypsin	0	10	6	0.375	0
High	[R].iALkkQR.[T]	HCD	2.67	0.00049	0.0039	0.406	0.51	1	Sequest HT (2)	2	574.385	0.61	65.3044	18470	18470	P62753	ArgAcetylD3	RIALKKQR	8	2	65.304	563	8		N-Term(ArgAcetylD3);K4(Acetyl:2H(3));K5(Acetyl:2H(3))	Acetyl:2H(3)@Any N-term;Acetyl:2H(3)@K;Acetyl:2H(3)@K	0;5;6	27	QE	0.157309	IALKKQR	0.768048	0.825912	0.618679	0.567871	4	0.35883	0.825693	1	RR	TRUE	trypsin	0	9	3	0.25	0
High	[R].vSEkEkESIAR.[A]	HCD	3.61	1.3e-05	2.7e-05	1.29	0.55	1	Sequest HT (2)	2	783.943	-0.82	65.4999	18561	18561	Q86Y82	ArgAcetylD3	RVSEKEKESIAR	12	2	65.5	564	12		N-Term(ArgAcetylD3);K4(Acetyl:2H(3));K6(Acetyl:2H(3))	Acetyl:2H(3)@Any N-term;Acetyl:2H(3)@K;Acetyl:2H(3)@K	0;5;7	27	QE	0.159091	VSEKEKESIAR	0.873011	0.898424	0.710574	0.54926	5	0.578703	0.913059	1	RR	TRUE	trypsin	2	11	3	0.214286	0.153846
High	[R].lAALQkR.[E]	HCD	1.84	0.00081	0.0074	0.331	0.37	1	Sequest HT (2)	2	523.341	-0.12	65.7699	18679	18679	Q99459	ArgAcetylD3	RLAALQKR	8	2	65.77	565	8		N-Term(ArgAcetylD3);K6(Acetyl:2H(3))	Acetyl:2H(3)@Any N-term;Acetyl:2H(3)@K	0;7	27	QE	0.161545	LAALQKR	0.893953	0.912496	0.731695	0.644499	4	0.372046	0.954393	1	RR	TRUE	trypsin	0	10	2	0.166667	0
High	[R].ekkAALEkEREER.[I]	HCD	4.31	1.3e-05	1.2e-05	1.46	0.51	1	Sequest HT (2)	3	651.369	-1.62	66.1811	18863	18863	Q8N6M0	ArgAcetylD3	REKKAALEKEREER	14	3	66.181	566	14		N-Term(ArgAcetylD3);K2(Acetyl:2H(3));K3(Acetyl:2H(3));K8(Acetyl:2H(3))	Acetyl:2H(3)@Any N-term;Acetyl:2H(3)@K;Acetyl:2H(3)@K;Acetyl:2H(3)@K	0;3;4;9	27	QE	0.165282	EKKAALEKEREER	0.95463	0.96467	0.830272	0.814266	9	0.943958	0.956606	1	RR	TRUE	trypsin	0	17	3	0.15	0
High	[R].eQQLAEIEAR.[Q]	HCD	3.85	1.3e-05	1.3e-05	1.44	0.55	1	Sequest HT (2)	2	694.373	1.3	66.8341	19162	19162	Q5JPE7; P69849; Q15155	ArgAcetylD3	REQQLAEIEAR	11	2	66.834	567	11		N-Term(ArgAcetylD3)	Acetyl:2H(3)@Any N-term	0	27	QE	0.171218	EQQLAEIEAR	0.978285	0.981935	0.878811	0.690994	8	0.957003	0.982849	1	RR;RR;RR	TRUE	trypsin	2	15	2	0.117647	0.117647
High	[R].vTkVLGR.[T]	HCD	2.18	0.001	0.0097	0.301	0.18	1	Sequest HT (2)	2	509.836	0.66	66.8675	19177	19177	P62857	ArgAcetylD3	RVTKVLGR	8	2	66.868	568	8		N-Term(ArgAcetylD3);K3(Acetyl:2H(3))	Acetyl:2H(3)@Any N-term;Acetyl:2H(3)@K	0;4	27	QE	0.171527	VTKVLGR	0.913532	0.922391	0.747535	0.366448	6	0.343597	0.953799	0	AR	TRUE	trypsin	3	10	2	0.166667	0.230769
Low	[R].aAPGAEFAPNkR.[Y]	HCD	2.04	0.68	1	-0.913	0.1	1	Sequest HT (2)	3	492.272	-1.59	66.9055	19194	19194	Q15233	ArgAcetylD3	RAAPGAEFAPNKR	13	3	66.906	569	13		N-Term(ArgAcetylD3);K11(Acetyl:2H(3))	Acetyl:2H(3)@Any N-term;Acetyl:2H(3)@K	0;12	27	QE	0.171873	AAPGAEFAPNKR	0.433314	0.4966	0.330837	-0.196157	4	0.735316	0.21618	0	NR	TRUE	trypsin	3	6	11	0.647059	0.333333
High	[R].qLAEEDLAQQR.[A]	HCD	3.9	2.3e-05	7.2e-05	1.11	0.43	1	Sequest HT (2)	2	751.393	-0.21	66.9884	19232	19232	Q15149	ArgAcetylD3	RQLAEEDLAQQR	12	2	66.988	570	12		N-Term(ArgAcetylD3)	Acetyl:2H(3)@Any N-term	0	27	QE	0.172618	QLAEEDLAQQR	0.92093	0.932883	0.76543	0.659056	6	0.913945	0.948193	0	LR	TRUE	trypsin	0	14	4	0.222222	0
High	[R].aEEQMLkER.[E]	HCD	3.76	3.2e-05	8.1e-05	1.08	0.51	1	Sequest HT (2)	2	690.366	1.58	67.0563	19265	19265	Q14152	ArgAcetylD3	RAEEQMLKER	10	2	67.056	571	10		N-Term(ArgAcetylD3);K7(Acetyl:2H(3))	Acetyl:2H(3)@Any N-term;Acetyl:2H(3)@K	0;8	27	QE	0.173236	AEEQMLKER	0.935183	0.948625	0.79505	0.63964	7	0.681824	0.963493	1	RR	TRUE	trypsin	0	14	3	0.176471	0
High	[R].eAEANRPLPELVR.[A]	HCD	2.71	0.00088	0.008	0.322	0.23	1	Sequest HT (2)	3	565.651	0.42	67.0939	19285	19285	Q92995	ArgAcetylD3	REAEANRPLPELVR	14	3	67.094	572	14		N-Term(ArgAcetylD3)	Acetyl:2H(3)@Any N-term	0	27	QE	0.173582	EAEANRPLPELVR	0.912886	0.923997	0.750196	0.358021	5	0.918253	0.91187	NA	NA	FALSE	trypsin	1	10	8	0.444444	0.0909091
High	[R].qLEEAEEEAQR.[A]	HCD	3.25	5.8e-05	0.00016	0.953	0.52	1	Sequest HT (2)	2	766.875	2.84	68.1682	19775	19775	P35579	ArgAcetylD3	RQLEEAEEEAQR	12	2	68.168	573	12		N-Term(ArgAcetylD3)	Acetyl:2H(3)@Any N-term	0	27	QE	0.183345	QLEEAEEEAQR	0.867843	0.882684	0.688531	0.741579	7	0.752474	0.919697	1	KR	TRUE	trypsin	1	15	2	0.117647	0.0625
High	[R].qkkLFcR.[Y]	HCD	3.08	0.00046	0.0033	0.429	0.56	1	Sequest HT (2)	2	635.873	-0.43	68.1894	19785	19785	P13674	ArgAcetylD3	RQKKLFCR	8	2	68.189	574	8		N-Term(ArgAcetylD3);K2(Acetyl:2H(3));K3(Acetyl:2H(3));C6(Carbamidomethyl)	Acetyl:2H(3)@Any N-term;Acetyl:2H(3)@K;Acetyl:2H(3)@K;Carbamidomethyl@C	0;3;4;7	27	QE	0.183536	QKKLFCR	0.914572	0.933948	0.767321	0.541325	7	0.562248	0.963274	1	RR	TRUE	trypsin	2	11	2	0.153846	0.153846
High	[R].tEITIVkPQESAHR.[M]	HCD	3.62	5e-05	9.6e-05	1.05	0.41	1	Sequest HT (2)	3	619.014	-2.16	68.2774	19827	19827	Q9UHD8	ArgAcetylD3	RTEITIVKPQESAHR	15	3	68.277	575	15		N-Term(ArgAcetylD3);K7(Acetyl:2H(3))	Acetyl:2H(3)@Any N-term;Acetyl:2H(3)@K	0;8	27	QE	0.184336	TEITIVKPQESAHR	0.99573	0.996205	0.944517	0.850752	7	0.99311	0.997752	1	RR	TRUE	trypsin	1	17	2	0.105263	0.0555556
High	[R].kPDTIEVQQmkAQAR.[E]	HCD	3.17	1.3e-05	7.4e-06	1.54	0.5	1	Sequest HT (2)	2	1025.56	-0.76	68.4199	19899	19899	P35241; P15311; P26038	ArgAcetylD3	RKPDTIEVQQMKAQAR	16	2	68.42	576	16		N-Term(ArgAcetylD3);K1(Acetyl:2H(3));M10(Oxidation);K11(Acetyl:2H(3))	Acetyl:2H(3)@Any N-term;Acetyl:2H(3)@K;Oxidation@M;Acetyl:2H(3)@K	0;2;11;12	27	QE	0.185636	KPDTIEVQQMKAQAR	0.942932	0.946709	0.791228	0.480995	6	0.954114	0.872401	1	RR;RR;RR	TRUE	trypsin	5	7	2	0.222222	0.416667
High	[R].kPDTIEVQQmkAQAR.[E]	HCD	6.22	1.3e-05	4.2e-06	1.65	0.72	1	Sequest HT (2)	3	684.04	-0.17	68.4293	19905	19905	P35241; P15311; P26038	ArgAcetylD3	RKPDTIEVQQMKAQAR	16	3	68.429	577	16		N-Term(ArgAcetylD3);K1(Acetyl:2H(3));M10(Oxidation);K11(Acetyl:2H(3))	Acetyl:2H(3)@Any N-term;Acetyl:2H(3)@K;Oxidation@M;Acetyl:2H(3)@K	0;2;11;12	27	QE	0.185718	KPDTIEVQQMKAQAR	0.987308	0.989882	0.909364	0.802417	13	0.994831	0.964093	1	RR;RR;RR	TRUE	trypsin	4	22	1	0.0434783	0.153846
Medium	[R].vQTPLLR.[A]	HCD	1.76	0.031	0.45	-0.151	0.26	1	Sequest HT (2)	2	514.326	-0.01	68.4441	19912	19912	Q9UHD8	ArgAcetylD3	RVQTPLLR	8	2	68.444	578	8		N-Term(ArgAcetylD3)	Acetyl:2H(3)@Any N-term	0	27	QE	0.185855	VQTPLLR	0.955375	0.96225	0.824518	0.573618	4	0.747217	0.980443	1	RR	TRUE	trypsin	0	8	3	0.272727	0
Low	[R].gSGDTSISIDTEASIR.[E]	HCD	1.27	0.83	1	-1.88	0.04	1	Sequest HT (2)	2	905.459	4.55	68.7073	20035	20035	Q32MZ4	ArgAcetylD3	RGSGDTSISIDTEASIR	17	2	68.707	579	17		N-Term(ArgAcetylD3)	Acetyl:2H(3)@Any N-term	0	27	QE	0.188245	GSGDTSISIDTEASIR	0.275393	0.322931	0.209336	0.0399954	1	0.516921	0.276261	1	RR	TRUE	trypsin	0	3	14	0.823529	0
High	[R].aVIVkPVR.[S]	HCD	2.55	0.00049	0.0039	0.407	0.63	1	Sequest HT (2)	2	564.38	0.49	68.9187	20131	20131	Q01664	ArgAcetylD3	RAVIVKPVR	9	2	68.919	580	9		N-Term(ArgAcetylD3);K5(Acetyl:2H(3))	Acetyl:2H(3)@Any N-term;Acetyl:2H(3)@K	0;6	27	QE	0.190173	AVIVKPVR	0.913177	0.928328	0.757507	0.365653	6	0.579403	0.960757	1	RR	TRUE	trypsin	4	9	2	0.181818	0.307692
High	[R].kEAPGPNGATEEDGVPSkVQR.[C]	HCD	6.24	1.3e-05	2.4e-07	2.19	0.72	1	Sequest HT (2)	3	819.761	0.21	69.3402	20326	20326	P49585	ArgAcetylD3	RKEAPGPNGATEEDGVPSKVQR	22	3	69.34	581	22		N-Term(ArgAcetylD3);K1(Acetyl:2H(3));K18(Acetyl:2H(3))	Acetyl:2H(3)@Any N-term;Acetyl:2H(3)@K;Acetyl:2H(3)@K	0;2;19	27	QE	0.194	KEAPGPNGATEEDGVPSKVQR	0.876088	0.888029	0.695851	0.759735	15	0.522125	0.933069	1	RR	TRUE	trypsin	2	26	4	0.133333	0.0714286
High	[R].aQSEAEkLAkER.[Q]	HCD	3.22	1.3e-05	3.9e-05	1.23	0.53	1	Sequest HT (2)	2	825.959	-0.8	70.0653	20675	20675	P26038	ArgAcetylD3	RAQSEAEKLAKER	13	2	70.065	582	13		N-Term(ArgAcetylD3);K7(Acetyl:2H(3));K10(Acetyl:2H(3))	Acetyl:2H(3)@Any N-term;Acetyl:2H(3)@K;Acetyl:2H(3)@K	0;8;11	27	QE	0.200591	AQSEAEKLAKER	0.864967	0.879038	0.683628	0.243704	3	0.283627	0.948477	1	KR	TRUE	trypsin	2	7	7	0.5	0.222222
High	[R].tSMGGTQQQFVEGVR.[M]	HCD	4.3	1.3e-05	5.1e-07	2.05	0.53	1	Sequest HT (2)	2	913.455	-1.92	70.2685	20765	20765	P35222	ArgAcetylD3	RTSMGGTQQQFVEGVR	16	2	70.268	583	16		N-Term(ArgAcetylD3)	Acetyl:2H(3)@Any N-term	0	27	QE	0.202436	TSMGGTQQQFVEGVR	0.908056	0.914757	0.735235	0.259711	6	0.715542	0.94562	1	RR	TRUE	trypsin	8	6	2	0.25	0.571429
Low	[R].gAGQEkVDR.[E]	HCD	0.85	0.38	1	-0.558	0.14	1	Sequest HT (2)	1	1205.65	3.3	70.3099	20782	20782	Q8NDH2	ArgAcetylD3	RGAGQEKVDR	10	1	70.31	584	10		N-Term(ArgAcetylD3);K6(Acetyl:2H(3))	Acetyl:2H(3)@Any N-term;Acetyl:2H(3)@K	0;7	27	QE	0.202818	GAGQEKVDR	0.71951	0.735664	0.52626	0.306821	0	NA	0.843148	1	RR	TRUE	trypsin	1	1	4	0.8	0.5
High	[R].vEEDIQQQkATGSEVSQR.[K]	HCD	4.75	1.3e-05	2.2e-05	1.33	0.67	1	Sequest HT (2)	3	760.056	-0.06	71.1508	21172	21172	P15924	ArgAcetylD3	RVEEDIQQQKATGSEVSQR	19	3	71.151	585	19		N-Term(ArgAcetylD3);K9(Acetyl:2H(3))	Acetyl:2H(3)@Any N-term;Acetyl:2H(3)@K	0;10	27	QE	0.210464	VEEDIQQQKATGSEVSQR	0.982546	0.985672	0.892105	0.879735	10	0.991702	0.976613	1	RR	TRUE	trypsin	0	22	3	0.12	0
High	[R].sNVLTGLQDSSTDNR.[A]	HCD	2.59	1.3e-05	1.2e-05	1.45	0.56	1	Sequest HT (2)	2	904.454	2.16	71.3224	21249	21249	O00257	ArgAcetylD3	RSNVLTGLQDSSTDNR	16	2	71.322	586	16		N-Term(ArgAcetylD3)	Acetyl:2H(3)@Any N-term	0	27	QE	0.212018	SNVLTGLQDSSTDNR	0.976685	0.978854	0.868847	0.646485	7	0.974933	0.978277	1	RR	TRUE	trypsin	3	10	2	0.166667	0.230769
High	[R].sNVLTGLQDSSTDNR.[A]	HCD	2.26	2.3e-05	5.8e-05	1.15	0.51	1	Sequest HT (2)	2	904.452	-0.61	71.4395	21302	21302	O00257	ArgAcetylD3	RSNVLTGLQDSSTDNR	16	2	71.44	587	16		N-Term(ArgAcetylD3)	Acetyl:2H(3)@Any N-term	0	27	QE	0.213091	SNVLTGLQDSSTDNR	0.809461	0.827604	0.620593	0.529425	5	0.577426	0.89327	1	RR	TRUE	trypsin	3	9	3	0.25	0.25
High	[R].gVVGPELYGR.[L]	HCD	3.13	1.3e-05	3.1e-05	1.27	0.55	1	Sequest HT (2)	2	624.35	-0.47	72.5902	21810	21810	P58107	ArgAcetylD3	RGVVGPELYGR	11	2	72.59	588	11		N-Term(ArgAcetylD3)	Acetyl:2H(3)@Any N-term	0	27	QE	0.223545	GVVGPELYGR	0.914403	0.928379	0.757594	0.610882	5	0.764648	0.951611	1	RR	TRUE	trypsin	0	10	4	0.285714	0
High	[R].lTPQAVkIR.[A]	HCD	2.32	0.0016	0.017	0.238	0.39	1	Sequest HT (2)	2	636.407	-0.19	72.9326	21965	21965	P05198	ArgAcetylD3	RLTPQAVKIR	10	2	72.933	589	10		N-Term(ArgAcetylD3);K7(Acetyl:2H(3))	Acetyl:2H(3)@Any N-term;Acetyl:2H(3)@K	0;8	27	QE	0.226664	LTPQAVKIR	0.928144	0.938844	0.776204	0.649678	5	0.389615	0.96767	1	RR	TRUE	trypsin	1	10	2	0.166667	0.0909091
High	[R].lTPQAVkIR.[A]	HCD	4.23	2.3e-05	5.8e-05	1.15	0.52	1	Sequest HT (2)	3	424.607	0.04	73.0422	22016	22016	P05198	ArgAcetylD3	RLTPQAVKIR	10	3	73.042	590	10		N-Term(ArgAcetylD3);K7(Acetyl:2H(3))	Acetyl:2H(3)@Any N-term;Acetyl:2H(3)@K	0;8	27	QE	0.227655	LTPQAVKIR	0.990221	0.992307	0.920984	0.705148	10	0.984857	0.994558	1	RR	TRUE	trypsin	4	14	1	0.0666667	0.222222
Low	[R].yQkSTELLIR.[K]	HCD	2.09	0.19	0.93	-0.403	0.35	1	Sequest HT (2)	2	748.938	-0.38	73.1322	22057	22057	P68431; Q16695; Q5TEC6; Q6NXT2; P84243; Q71DI3	ArgAcetylD3	RYQKSTELLIR	11	2	73.132	591	11		N-Term(ArgAcetylD3);K3(Acetyl:2H(3))	Acetyl:2H(3)@Any N-term;Acetyl:2H(3)@K	0;4	27	QE	0.228473	YQKSTELLIR	0.936338	0.942513	0.783088	0.628143	4	0.874977	0.965702	1	RR;RR;RR;RR;RR;RR	TRUE	trypsin	0	7	4	0.363636	0
High	[R].yQkSTELLIR.[K]	HCD	3.42	0.00046	0.0032	0.434	0.6	1	Sequest HT (2)	3	499.628	-0.98	73.3104	22143	22143	P68431; Q16695; Q5TEC6; Q6NXT2; P84243; Q71DI3	ArgAcetylD3	RYQKSTELLIR	11	3	73.31	592	11		N-Term(ArgAcetylD3);K3(Acetyl:2H(3))	Acetyl:2H(3)@Any N-term;Acetyl:2H(3)@K	0;4	27	QE	0.230091	YQKSTELLIR	0.960226	0.968677	0.84024	0.680488	7	0.958673	0.961014	1	RR;RR;RR;RR;RR;RR	TRUE	trypsin	2	13	3	0.1875	0.133333
Medium	[R].eDPSFERYPkNFSDSR.[N]	HCD	2.26	0.014	0.21	-0.046	0.36	1	Sequest HT (2)	3	740.692	1.16	73.5696	22266	22266	Q9NWH9	ArgAcetylD3	REDPSFERYPKNFSDSR	17	3	73.57	593	17		N-Term(ArgAcetylD3);K10(Acetyl:2H(3))	Acetyl:2H(3)@Any N-term;Acetyl:2H(3)@K	0;11	27	QE	0.232455	EDPSFERYPKNFSDSR	0.858913	0.867361	0.668372	0.121108	3	0.58936	0.996052	1	RR	TRUE	trypsin	3	9	11	0.55	0.25
High	[R].kTPEELLR.[Q]	HCD	2.6	0.0004	0.0028	0.451	0.33	1	Sequest HT (2)	2	616.368	0.14	73.8965	22403	22403	O43633	ArgAcetylD3	RKTPEELLR	9	2	73.896	594	9		N-Term(ArgAcetylD3);K1(Acetyl:2H(3))	Acetyl:2H(3)@Any N-term;Acetyl:2H(3)@K	0;2	27	QE	0.235418	KTPEELLR	0.954953	0.963189	0.82673	0.497434	4	0.816807	0.976436	1	RR	TRUE	trypsin	1	9	4	0.307692	0.1
High	[R].lPENLYNDR.[M]	HCD	3.19	6.5e-05	0.00023	0.874	0.54	1	Sequest HT (2)	2	667.847	-1.37	73.9004	22405	22405	P14927	ArgAcetylD3	RLPENLYNDR	10	2	73.9	595	10		N-Term(ArgAcetylD3)	Acetyl:2H(3)@Any N-term	0	27	QE	0.235455	LPENLYNDR	0.921008	0.933205	0.766	0.576963	7	0.446315	0.98757	1	RR	TRUE	trypsin	2	14	3	0.176471	0.125
High	[R].kYkTIESETVR.[T]	HCD	3.23	5e-05	0.00011	1.02	0.5	1	Sequest HT (2)	2	822.968	1.49	74.681	22744	22744	O43615	ArgAcetylD3	RKYKTIESETVR	12	2	74.681	596	12		N-Term(ArgAcetylD3);K1(Acetyl:2H(3));K3(Acetyl:2H(3))	Acetyl:2H(3)@Any N-term;Acetyl:2H(3)@K;Acetyl:2H(3)@K	0;2;4	27	QE	0.242555	KYKTIESETVR	0.935711	0.946063	0.789956	0.651092	4	0.770385	0.966957	1	RR	TRUE	trypsin	1	10	3	0.230769	0.0909091
High	[R].lEESDVLQEAR.[K]	HCD	4.23	1.3e-05	8.1e-06	1.53	0.58	1	Sequest HT (2)	2	745.389	1.23	75.1406	22936	22936	O43615	ArgAcetylD3	RLEESDVLQEAR	12	2	75.141	597	12		N-Term(ArgAcetylD3)	Acetyl:2H(3)@Any N-term	0	27	QE	0.246736	LEESDVLQEAR	0.958506	0.968106	0.838783	0.759901	8	0.931576	0.966429	1	RR	TRUE	trypsin	1	17	2	0.105263	0.0555556
High	[R].aQLGGPEAAkSDETAAk.[-]	HCD	4.05	0.00011	0.00037	0.785	0.66	1	Sequest HT (2)	3	645.676	0.69	75.3225	23012	23012	P04792	ArgAcetylD3	RAQLGGPEAAKSDETAAK	18	3	75.323	598	18		N-Term(ArgAcetylD3);K10(Acetyl:2H(3));K17(Acetyl:2H(3))	Acetyl:2H(3)@Any N-term;Acetyl:2H(3)@K;Acetyl:2H(3)@K	0;11;18	27	QE	0.248391	AQLGGPEAAKSDETAAK	0.988709	0.989931	0.909582	0.64683	15	0.975973	0.996608	0	SR	TRUE	trypsin	4	16	3	0.157895	0.2
High	[R].aQLGGPEAAkSDETAAk.[-]	HCD	4.68	3.2e-05	8.6e-05	1.07	0.73	1	Sequest HT (2)	2	968.008	-1.83	75.5342	23104	23104	P04792	ArgAcetylD3	RAQLGGPEAAKSDETAAK	18	2	75.534	599	18		N-Term(ArgAcetylD3);K10(Acetyl:2H(3));K17(Acetyl:2H(3))	Acetyl:2H(3)@Any N-term;Acetyl:2H(3)@K;Acetyl:2H(3)@K	0;11;18	27	QE	0.250309	AQLGGPEAAKSDETAAK	0.983084	0.985892	0.892936	0.868382	15	0.971929	0.988764	0	SR	TRUE	trypsin	0	20	3	0.130435	0
High	[R].qPQEEVVHEDQGkkPQDQLVIER.[E]	HCD	8.23	1.3e-05	4.5e-12	4.24	0.79	1	Sequest HT (2)	3	1007.52	-7.29	76.1301	23357	23357	Q8WWI1	ArgAcetylD3	RQPQEEVVHEDQGKKPQDQLVIER	24	3	76.13	600	24		N-Term(ArgAcetylD3);K13(Acetyl:2H(3));K14(Acetyl:2H(3))	Acetyl:2H(3)@Any N-term;Acetyl:2H(3)@K;Acetyl:2H(3)@K	0;14;15	27	QE	0.255727	QPQEEVVHEDQGKKPQDQLVIER	0.993918	0.994822	0.935189	0.894811	24	0.980379	0.997713	1	RR	TRUE	trypsin	5	39	0	0	0.113636
High	[R].qPQEEVVHEDQGkkPQDQLVIER.[E]	HCD	5.87	1.3e-05	1.9e-07	2.23	0.68	1	Sequest HT (2)	4	755.899	-0.42	76.1343	23359	23359	Q8WWI1	ArgAcetylD3	RQPQEEVVHEDQGKKPQDQLVIER	24	4	76.134	601	24		N-Term(ArgAcetylD3);K13(Acetyl:2H(3));K14(Acetyl:2H(3))	Acetyl:2H(3)@Any N-term;Acetyl:2H(3)@K;Acetyl:2H(3)@K	0;14;15	27	QE	0.255764	QPQEEVVHEDQGKKPQDQLVIER	0.988387	0.990048	0.910108	0.805296	18	0.960634	0.998928	1	RR	TRUE	trypsin	3	26	3	0.103448	0.103448
High	[R].wDQGLEkPR.[L]	HCD	1.64	0.0046	0.062	0.103	0.17	1	Sequest HT (2)	2	687.874	1.47	76.3873	23463	23463	Q13045	ArgAcetylD3	RWDQGLEKPR	10	2	76.387	602	10		N-Term(ArgAcetylD3);K7(Acetyl:2H(3))	Acetyl:2H(3)@Any N-term;Acetyl:2H(3)@K	0;8	27	QE	0.258064	WDQGLEKPR	0.515676	0.583805	0.396874	0.280051	2	0.925483	0.51497	1	RR	TRUE	trypsin	1	6	6	0.5	0.142857
High	[R].tNSTFNQVVLkR.[L]	HCD	3.42	1.3e-05	1.7e-05	1.39	0.5	1	Sequest HT (2)	2	826.971	0.1	76.4334	23482	23482	Q07020	ArgAcetylD3	RTNSTFNQVVLKR	13	2	76.433	603	13		N-Term(ArgAcetylD3);K11(Acetyl:2H(3))	Acetyl:2H(3)@Any N-term;Acetyl:2H(3)@K	0;12	27	QE	0.258482	TNSTFNQVVLKR	0.915528	0.927377	0.755884	0.528767	6	0.693401	0.948854	1	RR	TRUE	trypsin	3	12	3	0.2	0.2
Low	[R].dNLEFFLAGIGR.[L]	HCD	1.16	0.41	1	-0.59	0.13	1	Sequest HT (2)	3	518.281	-1.52	77.0355	23736	23736	P49327	ArgAcetylD3	RDNLEFFLAGIGR	13	3	77.036	604	13		N-Term(ArgAcetylD3)	Acetyl:2H(3)@Any N-term	0	27	QE	0.263964	DNLEFFLAGIGR	0.183414	0.27957	0.180384	-0.0712115	1	-0.0954419	0.233349	0	HR	TRUE	trypsin	1	5	12	0.705882	0.166667
High	[R].qQDANkETQLLEkER.[K]	HCD	4.45	2.3e-05	6.8e-05	1.12	0.62	1	Sequest HT (2)	3	707.712	-0.81	77.0618	23747	23747	Q8IWC1	ArgAcetylD3	RQQDANKETQLLEKER	16	3	77.062	605	16		N-Term(ArgAcetylD3);K6(Acetyl:2H(3));K13(Acetyl:2H(3))	Acetyl:2H(3)@Any N-term;Acetyl:2H(3)@K;Acetyl:2H(3)@K	0;7;14	27	QE	0.2642	QQDANKETQLLEKER	0.968982	0.975407	0.858521	0.771186	11	0.907359	0.997287	1	RR	TRUE	trypsin	0	20	5	0.2	0
High	[R].aALEAAAAAAPER.[G]	HCD	3.91	1.3e-05	2.2e-05	1.34	0.52	1	Sequest HT (2)	2	706.887	-0.92	77.2549	23826	23826	Q86UK7	ArgAcetylD3	RAALEAAAAAAPER	14	2	77.255	606	14		N-Term(ArgAcetylD3)	Acetyl:2H(3)@Any N-term	0	27	QE	0.265955	AALEAAAAAAPER	0.943479	0.950185	0.798213	0.418381	6	0.695849	0.970404	1	RR	TRUE	trypsin	5	11	3	0.214286	0.3125
High	[R].aALEAAAAAAPER.[G]	HCD	5.29	1.3e-05	6.3e-06	1.57	0.63	1	Sequest HT (2)	3	471.595	0.84	77.2891	23840	23840	Q86UK7	ArgAcetylD3	RAALEAAAAAAPER	14	3	77.289	607	14		N-Term(ArgAcetylD3)	Acetyl:2H(3)@Any N-term	0	27	QE	0.266264	AALEAAAAAAPER	0.99527	0.996335	0.945482	0.757321	15	0.998651	0.992482	1	RR	TRUE	trypsin	5	21	2	0.0869565	0.192308
High	[R].qEQIQAMPLADSQAVR.[E]	HCD	5.73	1.3e-05	2.9e-05	1.28	0.64	1	Sequest HT (2)	3	662.681	0.43	77.4614	23912	23912	Q15149	ArgAcetylD3	RQEQIQAMPLADSQAVR	17	3	77.461	608	17		N-Term(ArgAcetylD3)	Acetyl:2H(3)@Any N-term	0	27	QE	0.267827	QEQIQAMPLADSQAVR	0.994232	0.995143	0.937227	0.879281	10	0.991697	0.995549	1	RR	TRUE	trypsin	0	21	3	0.125	0
High	[R].qEQIQAMPLADSQAVR.[E]	HCD	4.1	1.3e-05	5.2e-07	2.05	0.69	1	Sequest HT (2)	2	993.516	-0.97	77.4995	23929	23929	Q15149	ArgAcetylD3	RQEQIQAMPLADSQAVR	17	2	77.5	609	17		N-Term(ArgAcetylD3)	Acetyl:2H(3)@Any N-term	0	27	QE	0.268182	QEQIQAMPLADSQAVR	0.986674	0.988083	0.901621	0.868498	6	0.976442	0.991524	1	RR	TRUE	trypsin	1	13	1	0.0714286	0.0714286
High	[R].aEVSPkGLQTPVkDAGGGTGR.[E]	HCD	6.28	1.3e-05	7.4e-07	1.98	0.68	1	Sequest HT (2)	3	772.758	-0.97	77.5517	23950	23950	O15061	ArgAcetylD3	RAEVSPKGLQTPVKDAGGGTGR	22	3	77.552	610	22		N-Term(ArgAcetylD3);K6(Acetyl:2H(3));K13(Acetyl:2H(3))	Acetyl:2H(3)@Any N-term;Acetyl:2H(3)@K;Acetyl:2H(3)@K	0;7;14	27	QE	0.268655	AEVSPKGLQTPVKDAGGGTGR	0.996135	0.996826	0.949265	0.814974	14	0.994888	0.997242	1	RR	TRUE	trypsin	4	29	2	0.0645161	0.121212
High	[R].kTGkEMLDYkR.[K]	HCD	4.23	0.00012	0.00042	0.758	0.65	1	Sequest HT (2)	3	568.988	-0.58	78.0753	24174	24174	Q92575	ArgAcetylD3	RKTGKEMLDYKR	12	3	78.075	611	12		N-Term(ArgAcetylD3);K1(Acetyl:2H(3));K4(Acetyl:2H(3));K10(Acetyl:2H(3))	Acetyl:2H(3)@Any N-term;Acetyl:2H(3)@K;Acetyl:2H(3)@K;Acetyl:2H(3)@K	0;2;5;11	27	QE	0.273409	KTGKEMLDYKR	0.995793	0.996668	0.948018	0.883439	9	0.991469	0.99778	1	RR	TRUE	trypsin	1	16	1	0.0588235	0.0588235
High	[R].vNAIEHVIIPR.[I]	HCD	3.08	0.00027	0.0015	0.541	0.61	1	Sequest HT (2)	3	487.962	-0.44	78.6803	24423	24423	Q9Y5K8	ArgAcetylD3	RVNAIEHVIIPR	12	3	78.68	612	12		N-Term(ArgAcetylD3)	Acetyl:2H(3)@Any N-term	0	27	QE	0.278909	VNAIEHVIIPR	0.987457	0.990036	0.910054	0.892248	7	0.982175	0.992221	1	RR	TRUE	trypsin	0	15	2	0.117647	0
High	[R].fELLSR.[E]	HCD	2.48	0.002	0.023	0.206	0.12	1	Sequest HT (2)	2	483.283	-1.02	79.204	24645	24645	Q8N3D4	ArgAcetylD3	RFELLSR	7	2	79.204	613	7		N-Term(ArgAcetylD3)	Acetyl:2H(3)@Any N-term	0	27	QE	0.283673	FELLSR	0.903314	0.92823	0.75734	0.516087	4	0.703234	0.937552	0.5	PD;RR	TRUE	trypsin	1	9	2	0.181818	0.1
High	[R].kFEQLkQER.[I]	HCD	2.83	0.00092	0.0085	0.316	0.45	1	Sequest HT (2)	2	748.932	2.71	79.2527	24667	24667	Q13310	ArgAcetylD3	RKFEQLKQER	10	2	79.253	614	10		N-Term(ArgAcetylD3);K1(Acetyl:2H(3));K6(Acetyl:2H(3))	Acetyl:2H(3)@Any N-term;Acetyl:2H(3)@K;Acetyl:2H(3)@K	0;2;7	27	QE	0.284118	KFEQLKQER	0.941237	0.94132	0.780828	0.383784	5	0.636018	0.966054	1	KR	TRUE	trypsin	2	10	5	0.333333	0.166667
High	[R].lETLLR.[AN]	HCD	2.25	0.0031	0.041	0.148	0.2	1	Sequest HT (2)	2	473.3	1.36	79.563	24796	24796	Q9UL42; O95816	ArgAcetylD3	RLETLLR	7	2	79.563	615	7		N-Term(ArgAcetylD3)	Acetyl:2H(3)@Any N-term	0	27	QE	0.286936	LETLLR	0.947972	0.956712	0.812	0.639565	4	0.764847	0.967949	0.142857	RR;EK;LR;WY;AT;GA;PT	TRUE	trypsin	0	9	2	0.181818	0
High	[R].aTLDQVATLER.[S]	HCD	3.78	1.3e-05	2.2e-05	1.33	0.49	1	Sequest HT (2)	2	709.392	-4.84	79.6758	24846	24846	Q5TZA2	ArgAcetylD3	RATLDQVATLER	12	2	79.676	616	12		N-Term(ArgAcetylD3)	Acetyl:2H(3)@Any N-term	0	27	QE	0.287964	ATLDQVATLER	0.958207	0.963878	0.828369	0.431853	9	0.921059	0.975037	1	RR	TRUE	trypsin	4	12	3	0.2	0.25
High	[R].kPDTIEVQQMkAQAR.[E]	HCD	6.35	1.3e-05	4.3e-06	1.65	0.6	1	Sequest HT (2)	3	678.708	-1.03	80.5734	25239	25239	P35241; P15311; P26038	ArgAcetylD3	RKPDTIEVQQMKAQAR	16	3	80.573	617	16		N-Term(ArgAcetylD3);K1(Acetyl:2H(3));K11(Acetyl:2H(3))	Acetyl:2H(3)@Any N-term;Acetyl:2H(3)@K;Acetyl:2H(3)@K	0;2;12	27	QE	0.296118	KPDTIEVQQMKAQAR	0.987831	0.99053	0.91232	0.826591	12	0.994282	0.980102	1	RR;RR;RR	TRUE	trypsin	1	24	3	0.111111	0.04
High	[R].kPDTIEVQQMkAQAR.[E]	HCD	4.16	1.3e-05	2.9e-08	2.59	0.63	1	Sequest HT (2)	2	1017.56	2.33	80.5787	25242	25242	P35241; P15311; P26038	ArgAcetylD3	RKPDTIEVQQMKAQAR	16	2	80.579	618	16		N-Term(ArgAcetylD3);K1(Acetyl:2H(3));K11(Acetyl:2H(3))	Acetyl:2H(3)@Any N-term;Acetyl:2H(3)@K;Acetyl:2H(3)@K	0;2;12	27	QE	0.296173	KPDTIEVQQMKAQAR	0.888416	0.900655	0.713826	0.295582	6	0.828869	0.966293	1	RR;RR;RR	TRUE	trypsin	7	8	3	0.272727	0.466667
High	[R].yQkSTELLIR.[K]	HCD	3.37	1.3e-05	9.9e-06	1.49	0.47	1	Sequest HT (2)	2	748.939	-0.32	80.6614	25281	25281	P68431; Q16695; Q5TEC6; Q6NXT2; P84243; Q71DI3	ArgAcetylD3	RYQKSTELLIR	11	2	80.661	619	11		N-Term(ArgAcetylD3);K3(Acetyl:2H(3))	Acetyl:2H(3)@Any N-term;Acetyl:2H(3)@K	0;4	27	QE	0.296918	YQKSTELLIR	0.967452	0.97206	0.849158	0.636773	4	0.90259	0.977224	1	RR;RR;RR;RR;RR;RR	TRUE	trypsin	2	9	2	0.181818	0.181818
High	[R].gWVTFDR.[S]	HCD	2.66	0.00025	0.0013	0.557	0.39	1	Sequest HT (2)	2	541.284	-0.47	80.6926	25296	25296	Q9BXP5	ArgAcetylD3	RGWVTFDR	8	2	80.693	620	8		N-Term(ArgAcetylD3)	Acetyl:2H(3)@Any N-term	0	27	QE	0.297209	GWVTFDR	0.964246	0.968229	0.839096	0.331691	4	0.774791	0.983479	1	RR	TRUE	trypsin	1	8	5	0.384615	0.111111
High	[R].kPDTIEVQQmkAQAR.[E]	HCD	5.23	5e-05	0.0001	1.04	0.62	1	Sequest HT (2)	3	684.038	-2.68	80.7069	25302	25302	P35241; P15311; P26038	ArgAcetylD3	RKPDTIEVQQMKAQAR	16	3	80.707	621	16		N-Term(ArgAcetylD3);K1(Acetyl:2H(3));M10(Oxidation);K11(Acetyl:2H(3))	Acetyl:2H(3)@Any N-term;Acetyl:2H(3)@K;Oxidation@M;Acetyl:2H(3)@K	0;2;11;12	27	QE	0.297336	KPDTIEVQQMKAQAR	0.951596	0.959219	0.817564	0.566102	11	0.991232	0.833043	1	RR;RR;RR	TRUE	trypsin	3	17	6	0.26087	0.15
High	[R].kPDTIEVQQmkAQAR.[E]	HCD	2.03	0.00014	0.0006	0.691	0.26	1	Sequest HT (2)	2	1025.55	-2.53	80.8337	25361	25361	P35241; P15311; P26038	ArgAcetylD3	RKPDTIEVQQMKAQAR	16	2	80.834	622	16		N-Term(ArgAcetylD3);K1(Acetyl:2H(3));M10(Oxidation);K11(Acetyl:2H(3))	Acetyl:2H(3)@Any N-term;Acetyl:2H(3)@K;Oxidation@M;Acetyl:2H(3)@K	0;2;11;12	27	QE	0.298491	KPDTIEVQQMKAQAR	0.909955	0.916374	0.737795	0.620617	4	0.956726	0.893281	1	RR;RR;RR	TRUE	trypsin	3	7	2	0.222222	0.3
High	[R].lQEPkkDLIAR.[V]	HCD	2.36	0.0074	0.1	0.041	0.59	1	Sequest HT (2)	2	801.487	-1.58	80.8916	25386	25386	Q9H814	ArgAcetylD3	RLQEPKKDLIAR	12	2	80.892	623	12		N-Term(ArgAcetylD3);K5(Acetyl:2H(3));K6(Acetyl:2H(3))	Acetyl:2H(3)@Any N-term;Acetyl:2H(3)@K;Acetyl:2H(3)@K	0;6;7	27	QE	0.299018	LQEPKKDLIAR	0.941071	0.947279	0.792358	0.569133	3	0.845339	0.978074	0	FR	TRUE	trypsin	0	9	5	0.357143	0
Low	[R].sIkLDGkGEPkGAkR.[A]	HCD	1.66	0.74	1	-1.06	0.08	1	Sequest HT (2)	3	655.73	1.57	81.2613	25548	25548	Q13576	ArgAcetylD3	RSIKLDGKGEPKGAKR	16	3	81.261	624	16		N-Term(ArgAcetylD3);K3(Acetyl:2H(3));K7(Acetyl:2H(3));K11(Acetyl:2H(3));K14(Acetyl:2H(3))	Acetyl:2H(3)@Any N-term;Acetyl:2H(3)@K;Acetyl:2H(3)@K;Acetyl:2H(3)@K;Acetyl:2H(3)@K	0;4;8;12;15	27	QE	0.302373	SIKLDGKGEPKGAKR	0.482653	0.512692	0.342703	-0.247458	2	-0.0775308	0.501955	1	RR	TRUE	trypsin	1	3	17	0.85	0.25
High	[R].qFHLTDDDLLR.[Y]	HCD	3.62	5.5e-05	0.00012	1.01	0.65	1	Sequest HT (2)	3	525.277	-0.08	82.1592	25941	25941	Q04446	ArgAcetylD3	RQFHLTDDDLLR	12	3	82.159	625	12		N-Term(ArgAcetylD3)	Acetyl:2H(3)@Any N-term	0	27	QE	0.310536	QFHLTDDDLLR	0.784068	0.830904	0.624353	0.64172	7	0.586817	0.950159	1	RR	TRUE	trypsin	0	15	4	0.210526	0
High	[R].eEDAEkAVIDLNNR.[W]	HCD	3.96	5.5e-05	0.00013	0.991	0.7	1	Sequest HT (2)	3	621.322	-0.24	82.5066	26096	26096	Q01081	ArgAcetylD3	REEDAEKAVIDLNNR	15	3	82.507	626	15		N-Term(ArgAcetylD3);K6(Acetyl:2H(3))	Acetyl:2H(3)@Any N-term;Acetyl:2H(3)@K	0;7	27	QE	0.3137	EEDAEKAVIDLNNR	0.992858	0.994225	0.931548	0.897061	9	0.995379	0.993069	1	RR	TRUE	trypsin	1	17	1	0.0555556	0.0555556
Low	[R].eEDAEkAVIDLNNR.[W]	HCD	1.85	0.057	0.65	-0.225	0.32	1	Sequest HT (2)	2	931.482	2.78	83.0124	26329	26329	Q01081	ArgAcetylD3	REEDAEKAVIDLNNR	15	2	83.012	627	15		N-Term(ArgAcetylD3);K6(Acetyl:2H(3))	Acetyl:2H(3)@Any N-term;Acetyl:2H(3)@K	0;7	27	QE	0.318291	EEDAEKAVIDLNNR	0.80607	0.836599	0.630919	0.170301	6	0.726444	0.868995	1	RR	TRUE	trypsin	3	10	10	0.5	0.230769
High	[R].lkTLLVNNNR.[I]	HCD	2.14	5.8e-05	0.00018	0.93	0.36	1	Sequest HT (2)	2	715.939	-0.35	84.2202	26886	26886	P09661	ArgAcetylD3	RLKTLLVNNNR	11	2	84.22	628	11		N-Term(ArgAcetylD3);K2(Acetyl:2H(3))	Acetyl:2H(3)@Any N-term;Acetyl:2H(3)@K	0;3	27	QE	0.329273	LKTLLVNNNR	0.941842	0.948599	0.794998	0.446717	3	0.74062	0.95903	1	RR	TRUE	trypsin	1	9	5	0.357143	0.1
High	[R].sTGkANkITITNDkGR.[L]	HCD	5.58	0.00021	0.001	0.602	0.42	1	Sequest HT (2)	3	680.721	-5.43	84.6895	27100	27100	P17066	ArgAcetylD3	RSTGKANKITITNDKGR	17	3	84.69	629	17		N-Term(ArgAcetylD3);K4(Acetyl:2H(3));K7(Acetyl:2H(3));K14(Acetyl:2H(3))	Acetyl:2H(3)@Any N-term;Acetyl:2H(3)@K;Acetyl:2H(3)@K;Acetyl:2H(3)@K	0;5;8;15	27	QE	0.333545	STGKANKITITNDKGR	0.773988	0.805297	0.595989	0.381891	10	0.231389	0.996097	0	DK;DK;DR	TRUE	trypsin	7	16	5	0.238095	0.304348
High	[R].fGDkLNFR.[Q]	HCD	1.96	0.0066	0.09	0.059	0.44	1	Sequest HT (2)	2	621.845	-2	85.3315	27387	27387	Q13794	ArgAcetylD3	RFGDKLNFR	9	2	85.332	630	9		N-Term(ArgAcetylD3);K4(Acetyl:2H(3))	Acetyl:2H(3)@Any N-term;Acetyl:2H(3)@K	0;5	27	QE	0.339382	FGDKLNFR	0.921391	0.925218	0.752235	0.4386	4	0.871795	0.946185	1	RR	TRUE	trypsin	0	9	6	0.4	0
High	[R].kkkEYVkcLENR.[V]	HCD	4.33	5.5e-05	0.00012	1.01	0.53	1	Sequest HT (2)	3	659.378	-1.48	86.2079	27779	27779	P18846; P16220	ArgAcetylD3	RKKKEYVKCLENR	13	3	86.208	631	13		N-Term(ArgAcetylD3);K1(Acetyl:2H(3));K2(Acetyl:2H(3));K3(Acetyl:2H(3));K7(Acetyl:2H(3));C8(Carbamidomethyl)	Acetyl:2H(3)@Any N-term;Acetyl:2H(3)@K;Acetyl:2H(3)@K;Acetyl:2H(3)@K;Acetyl:2H(3)@K;Carbamidomethyl@C	0;2;3;4;8;9	27	QE	0.347345	KKKEYVKCLENR	0.982969	0.986989	0.897191	0.855189	11	0.991908	0.979294	1	RR;RR	TRUE	trypsin	2	20	1	0.047619	0.0909091
High	[R].iDDIFER.[S]	HCD	2.98	0.00027	0.0014	0.545	0.46	1	Sequest HT (2)	2	554.795	0.73	86.6546	27976	27976	Q01082	ArgAcetylD3	RIDDIFER	8	2	86.655	632	8		N-Term(ArgAcetylD3)	Acetyl:2H(3)@Any N-term	0	27	QE	0.351409	IDDIFER	0.974524	0.978529	0.867839	0.702791	5	0.92917	0.986714	0	PR	TRUE	trypsin	0	10	3	0.230769	0
High	[R].iALTDNALIAR.[S]	HCD	1.54	0.0069	0.094	0.054	0.13	1	Sequest HT (2)	2	686.41	-2.03	86.8138	28050	28050	P18124	ArgAcetylD3	RIALTDNALIAR	12	2	86.814	633	12		N-Term(ArgAcetylD3)	Acetyl:2H(3)@Any N-term	0	27	QE	0.352855	IALTDNALIAR	0.873084	0.87832	0.682671	0.524172	5	0.72321	0.936362	1	KR	TRUE	trypsin	1	11	5	0.3125	0.0833333
High	[R].gDLPFVVPR.[M]	HCD	2.65	0.00025	0.0013	0.558	0.32	1	Sequest HT (2)	2	600.849	-0.96	87.5527	28373	28373	P35579	ArgAcetylD3	RGDLPFVVPR	10	2	87.553	634	10		N-Term(ArgAcetylD3)	Acetyl:2H(3)@Any N-term	0	27	QE	0.359573	GDLPFVVPR	0.861823	0.90182	0.715537	0.730245	7	0.846909	0.932221	1	RR	TRUE	trypsin	1	14	2	0.125	0.0666667
High	[R].eLQSQISDTSVVLSmDNSR.[S]	HCD	4.67	1.3e-05	1.9e-06	1.8	0.6	1	Sequest HT (2)	3	776.052	0.82	87.6819	28433	28433	P05787	ArgAcetylD3	RELQSQISDTSVVLSMDNSR	20	3	87.682	635	20		N-Term(ArgAcetylD3);M15(Oxidation)	Acetyl:2H(3)@Any N-term;Oxidation@M	0;16	27	QE	0.360745	ELQSQISDTSVVLSMDNSR	0.907142	0.925673	0.753	0.767054	16	0.987197	0.86691	0	IR;LT	TRUE	trypsin	1	26	6	0.1875	0.037037
High	[R].gDLPFVVPR.[M]	HCD	3.03	0.00028	0.0016	0.532	0.53	1	Sequest HT (2)	2	600.851	1.47	88.0617	28588	28588	P35579	ArgAcetylD3	RGDLPFVVPR	10	2	88.062	636	10		N-Term(ArgAcetylD3)	Acetyl:2H(3)@Any N-term	0	27	QE	0.3642	GDLPFVVPR	0.895342	0.923611	0.749554	0.812999	6	0.950238	0.856533	1	RR	TRUE	trypsin	0	14	2	0.125	0
Low	[R].qLFHPEQLITGkEDAANNYAR.[G]	HCD	1.45	0.78	1	-1.26	0.09	1	Sequest HT (2)	3	887.789	-4.33	88.0841	28599	28599	P68363; P0DPH8; P68366; Q9NY65; Q71U36; Q9BQE3	ArgAcetylD3	RQLFHPEQLITGKEDAANNYAR	22	3	88.084	637	22		N-Term(ArgAcetylD3);K12(Acetyl:2H(3))	Acetyl:2H(3)@Any N-term;Acetyl:2H(3)@K	0;13	27	QE	0.3644	QLFHPEQLITGKEDAANNYAR	-0.0498803	0.0425697	0.0271089	-0.657366	5	-0.0766161	NA	0	YR;YR;YR;YR;YR;YR;YR	TRUE	trypsin	2	3	34	0.918919	0.4
High	[R].qEIEQkLEVQAEEER.[K]	HCD	4.39	3.2e-05	8.4e-05	1.08	0.66	1	Sequest HT (2)	3	702.029	-2.35	88.5136	28773	28773	Q9H307	ArgAcetylD3	RQEIEQKLEVQAEEER	16	3	88.514	638	16		N-Term(ArgAcetylD3);K6(Acetyl:2H(3))	Acetyl:2H(3)@Any N-term;Acetyl:2H(3)@K	0;7	27	QE	0.368309	QEIEQKLEVQAEEER	0.969574	0.9766	0.862009	0.833231	8	0.944632	0.99414	1	RR	TRUE	trypsin	1	18	2	0.1	0.0526316
High	[R].gDLPFVVPR.[M]	HCD	2.94	0.00012	0.00045	0.746	0.58	1	Sequest HT (2)	2	600.85	0.03	88.5714	28797	28797	P35579	ArgAcetylD3	RGDLPFVVPR	10	2	88.571	639	10		N-Term(ArgAcetylD3)	Acetyl:2H(3)@Any N-term	0	27	QE	0.368827	GDLPFVVPR	0.93874	0.956395	0.811308	0.812999	6	0.918495	0.952295	1	RR	TRUE	trypsin	0	14	2	0.125	0
High	[R].qEIEQkLEVQAEEER.[K]	HCD	5.26	1.3e-05	3.2e-09	3	0.61	1	Sequest HT (2)	2	1052.54	-0.23	88.5777	28800	28800	Q9H307	ArgAcetylD3	RQEIEQKLEVQAEEER	16	2	88.578	640	16		N-Term(ArgAcetylD3);K6(Acetyl:2H(3))	Acetyl:2H(3)@Any N-term;Acetyl:2H(3)@K	0;7	27	QE	0.368891	QEIEQKLEVQAEEER	0.926743	0.942695	0.783436	0.662434	10	0.769023	0.982711	1	RR	TRUE	trypsin	4	16	2	0.111111	0.2
High	[R].dPTLLVSVVR.[I]	HCD	2.23	0.00028	0.0015	0.536	0.32	1	Sequest HT (2)	2	650.395	0.92	88.8564	28918	28918	O60645	ArgAcetylD3	RDPTLLVSVVR	11	2	88.856	641	11		N-Term(ArgAcetylD3)	Acetyl:2H(3)@Any N-term	0	27	QE	0.371418	DPTLLVSVVR	0.964371	0.969491	0.842341	0.471857	7	0.918967	0.985897	1	RR	TRUE	trypsin	1	13	5	0.277778	0.0714286
High	[R].qEIEQkLEVQAEEER.[K]	HCD	4.98	5.5e-05	0.00012	1	0.63	1	Sequest HT (2)	3	702.032	1.29	89.0379	28993	28993	Q9H307	ArgAcetylD3	RQEIEQKLEVQAEEER	16	3	89.038	642	16		N-Term(ArgAcetylD3);K6(Acetyl:2H(3))	Acetyl:2H(3)@Any N-term;Acetyl:2H(3)@K	0;7	27	QE	0.373073	QEIEQKLEVQAEEER	0.891541	0.917898	0.740229	0.700278	9	0.943091	0.87317	1	RR	TRUE	trypsin	3	18	2	0.1	0.142857
High	[R].lSEDYGVLkTDEGIAYR.[G]	HCD	4.66	9e-05	0.00033	0.807	0.61	1	Sequest HT (2)	3	725.713	1.64	89.2911	29103	29103	P32119	ArgAcetylD3	RLSEDYGVLKTDEGIAYR	18	3	89.291	643	18		N-Term(ArgAcetylD3);K9(Acetyl:2H(3))	Acetyl:2H(3)@Any N-term;Acetyl:2H(3)@K	0;10	27	QE	0.375373	LSEDYGVLKTDEGIAYR	0.955987	0.963293	0.826976	0.687827	9	0.899302	0.994458	1	RR	TRUE	trypsin	3	16	3	0.157895	0.157895
Low	[R].qDPQVVSPFSR.[G]	HCD	1.53	0.43	1	-0.607	0.25	1	Sequest HT (2)	2	730.888	-0.15	89.784	29318	29318	Q12986	ArgAcetylD3	RQDPQVVSPFSR	12	2	89.784	644	12		N-Term(ArgAcetylD3)	Acetyl:2H(3)@Any N-term	0	27	QE	0.379855	QDPQVVSPFSR	0.0873698	0.171531	0.109743	-0.26716	3	0.0219616	0.130492	1	RR	TRUE	trypsin	2	4	11	0.733333	0.333333
High	[R].kIMSSPLSkELR.[Q]	HCD	4.12	1.3e-05	3.5e-05	1.25	0.58	1	Sequest HT (2)	3	560.666	-0.13	89.9668	29396	29396	Q9UNX3; P61254	ArgAcetylD3	RKIMSSPLSKELR	13	3	89.967	645	13		N-Term(ArgAcetylD3);K1(Acetyl:2H(3));K9(Acetyl:2H(3))	Acetyl:2H(3)@Any N-term;Acetyl:2H(3)@K;Acetyl:2H(3)@K	0;2;10	27	QE	0.381518	KIMSSPLSKELR	0.981465	0.985451	0.891274	0.794724	9	0.991626	0.977071	1	RR;RR	TRUE	trypsin	2	18	2	0.1	0.1
High	[R].gDLPFVVPR.[M]	HCD	2.26	0.001	0.01	0.297	0.35	1	Sequest HT (2)	2	600.853	4.58	90.0931	29449	29449	P35579	ArgAcetylD3	RGDLPFVVPR	10	2	90.093	646	10		N-Term(ArgAcetylD3)	Acetyl:2H(3)@Any N-term	0	27	QE	0.382664	GDLPFVVPR	0.789699	0.809035	0.60002	0.748649	6	0.862281	0.788111	1	RR	TRUE	trypsin	0	13	3	0.1875	0
High	[R].iDWEkLENR.[E]	HCD	3.07	1.3e-05	4.8e-05	1.19	0.41	1	Sequest HT (2)	2	724.892	0.67	91.3033	29956	29956	P17252	ArgAcetylD3	RIDWEKLENR	10	2	91.303	647	10		N-Term(ArgAcetylD3);K5(Acetyl:2H(3))	Acetyl:2H(3)@Any N-term;Acetyl:2H(3)@K	0;6	27	QE	0.393664	IDWEKLENR	0.965517	0.973301	0.852561	0.730759	7	0.951821	0.974511	1	RR	TRUE	trypsin	1	14	2	0.125	0.0666667
High	[R].vVSEIPVLkTNAGPR.[D]	HCD	4.62	1.3e-05	1.9e-05	1.37	0.56	1	Sequest HT (2)	3	609.364	0.04	91.3371	29971	29971	Q9Y3C8	ArgAcetylD3	RVVSEIPVLKTNAGPR	16	3	91.337	648	16		N-Term(ArgAcetylD3);K9(Acetyl:2H(3))	Acetyl:2H(3)@Any N-term;Acetyl:2H(3)@K	0;10	27	QE	0.393973	VVSEIPVLKTNAGPR	0.996731	0.997163	0.952031	0.828147	7	0.998837	0.992823	1	RR	TRUE	trypsin	1	19	3	0.136364	0.05
High	[R].vVSEIPVLkTNAGPR.[D]	HCD	2.64	0.0037	0.051	0.124	0.63	1	Sequest HT (2)	2	913.542	0.38	91.3716	29986	29986	Q9Y3C8	ArgAcetylD3	RVVSEIPVLKTNAGPR	16	2	91.372	649	16		N-Term(ArgAcetylD3);K9(Acetyl:2H(3))	Acetyl:2H(3)@Any N-term;Acetyl:2H(3)@K	0;10	27	QE	0.394291	VVSEIPVLKTNAGPR	0.880424	0.891169	0.700229	0.600667	4	0.682632	0.928537	1	RR	TRUE	trypsin	2	5	3	0.375	0.285714
High	[R].iDWEkLENR.[E]	HCD	2.69	0.0013	0.013	0.268	0.35	1	Sequest HT (2)	3	483.597	-0.63	91.4371	30014	30014	P17252	ArgAcetylD3	RIDWEKLENR	10	3	91.437	650	10		N-Term(ArgAcetylD3);K5(Acetyl:2H(3))	Acetyl:2H(3)@Any N-term;Acetyl:2H(3)@K	0;6	27	QE	0.394882	IDWEKLENR	0.992856	0.994343	0.932255	0.781853	4	0.979812	0.99865	1	RR	TRUE	trypsin	0	11	3	0.214286	0
High	[R].fDPTWESLDAR.[Q]	HCD	2.16	5.5e-05	0.00014	0.977	0.19	1	Sequest HT (2)	2	769.377	-0.44	91.5038	30041	30041	Q9BTY2	ArgAcetylD3	RFDPTWESLDAR	12	2	91.504	651	12		N-Term(ArgAcetylD3)	Acetyl:2H(3)@Any N-term	0	27	QE	0.395491	FDPTWESLDAR	0.991156	0.991821	0.918522	0.572375	6	0.990471	0.995869	0	TR	TRUE	trypsin	1	14	5	0.263158	0.0666667
High	[R].aEDGSVIDYELIDQDAR.[D]	HCD	4.95	1.3e-05	1.7e-07	2.26	0.68	1	Sequest HT (2)	2	1055.51	2.59	91.7754	30154	30154	P07355	ArgAcetylD3	RAEDGSVIDYELIDQDAR	18	2	91.775	652	18		N-Term(ArgAcetylD3)	Acetyl:2H(3)@Any N-term	0	27	QE	0.397955	AEDGSVIDYELIDQDAR	0.942005	0.950603	0.799069	0.769649	11	0.954866	0.946288	1	RR	TRUE	trypsin	3	18	2	0.1	0.142857
High	[R].aEDGSVIDYELIDQDAR.[D]	HCD	5.63	1.3e-05	3.9e-06	1.66	0.64	1	Sequest HT (2)	3	704.008	-2.22	91.8188	30173	30173	P07355	ArgAcetylD3	RAEDGSVIDYELIDQDAR	18	3	91.819	653	18		N-Term(ArgAcetylD3)	Acetyl:2H(3)@Any N-term	0	27	QE	0.398355	AEDGSVIDYELIDQDAR	0.973849	0.978606	0.868076	0.727354	13	0.995847	0.96563	1	RR	TRUE	trypsin	5	21	2	0.0869565	0.192308
High	[R].iEEELGSkAkFAGR.[N]	HCD	4.75	5.8e-05	0.00016	0.948	0.62	1	Sequest HT (2)	3	609.341	-1.26	91.9919	30247	30247	P06733	ArgAcetylD3	RIEEELGSKAKFAGR	15	3	91.992	654	15		N-Term(ArgAcetylD3);K8(Acetyl:2H(3));K10(Acetyl:2H(3))	Acetyl:2H(3)@Any N-term;Acetyl:2H(3)@K;Acetyl:2H(3)@K	0;9;11	27	QE	0.399927	IEEELGSKAKFAGR	0.990039	0.991884	0.918835	0.851265	7	0.963683	0.998469	0	LR	TRUE	trypsin	1	18	2	0.1	0.0526316
High	[R].lVNHFVEEFkR.[K]	HCD	3.21	7.2e-05	0.00025	0.859	0.63	1	Sequest HT (2)	3	555.31	-1.44	92.0429	30270	30270	P0DMV9	ArgAcetylD3	RLVNHFVEEFKR	12	3	92.043	655	12		N-Term(ArgAcetylD3);K10(Acetyl:2H(3))	Acetyl:2H(3)@Any N-term;Acetyl:2H(3)@K	0;11	27	QE	0.400391	LVNHFVEEFKR	0.986856	0.989286	0.906724	0.815292	8	0.985772	0.989	0	NR;NR	TRUE	trypsin	1	15	2	0.117647	0.0625
High	[R].lVNHFVEEFkR.[K]	HCD	3.27	5e-05	0.00011	1.03	0.51	1	Sequest HT (2)	2	832.463	0.55	92.1423	30316	30316	P0DMV9	ArgAcetylD3	RLVNHFVEEFKR	12	2	92.142	656	12		N-Term(ArgAcetylD3);K10(Acetyl:2H(3))	Acetyl:2H(3)@Any N-term;Acetyl:2H(3)@K	0;11	27	QE	0.401291	LVNHFVEEFKR	0.945417	0.954509	0.807239	0.467301	10	0.545224	0.983131	0	NR;NR	TRUE	trypsin	5	14	3	0.176471	0.263158
High	[R].qATkDAGAIAGLNVLR.[I]	HCD	5.43	1.3e-05	4.3e-05	1.21	0.64	1	Sequest HT (2)	3	615.358	-1.8	92.2584	30368	30368	P17066	ArgAcetylD3	RQATKDAGAIAGLNVLR	17	3	92.258	657	17		N-Term(ArgAcetylD3);K4(Acetyl:2H(3))	Acetyl:2H(3)@Any N-term;Acetyl:2H(3)@K	0;5	27	QE	0.402345	QATKDAGAIAGLNVLR	0.991634	0.992964	0.924437	0.764766	13	0.989609	0.99443	0	QR	TRUE	trypsin	2	22	4	0.153846	0.0833333
High	[R].aEDGSVIDYELIDQDAR.[D]	HCD	5.56	1.3e-05	2.3e-08	2.63	0.74	1	Sequest HT (2)	2	1055.51	1.66	92.7794	30583	30583	P07355	ArgAcetylD3	RAEDGSVIDYELIDQDAR	18	2	92.779	658	18		N-Term(ArgAcetylD3)	Acetyl:2H(3)@Any N-term	0	27	QE	0.407082	AEDGSVIDYELIDQDAR	0.99557	0.996208	0.944541	0.707352	11	0.996049	0.995495	1	RR	TRUE	trypsin	6	19	1	0.05	0.24
High	[R].aEDGSVIDYELIDQDAR.[D]	HCD	6.35	1.3e-05	6.7e-06	1.56	0.66	1	Sequest HT (2)	3	704.008	-1.79	92.8062	30594	30594	P07355	ArgAcetylD3	RAEDGSVIDYELIDQDAR	18	3	92.806	659	18		N-Term(ArgAcetylD3)	Acetyl:2H(3)@Any N-term	0	27	QE	0.407327	AEDGSVIDYELIDQDAR	0.991614	0.993154	0.925464	0.847444	13	0.993036	0.992184	1	RR	TRUE	trypsin	3	22	1	0.0434783	0.12
High	[R].aPEEELPPLDPEEIR.[K]	HCD	4.74	1.3e-05	7.4e-06	1.54	0.64	1	Sequest HT (2)	2	967.997	-1.3	92.8155	30599	30599	Q8IY67	ArgAcetylD3	RAPEEELPPLDPEEIR	16	2	92.816	660	16		N-Term(ArgAcetylD3)	Acetyl:2H(3)@Any N-term	0	27	QE	0.407418	APEEELPPLDPEEIR	0.99449	0.994819	0.93517	0.596082	9	0.991197	0.996772	1	RR	TRUE	trypsin	4	17	3	0.15	0.190476
High	[R].yGELTkLIR.[Q]	HCD	2.95	0.0002	0.00086	0.628	0.26	1	Sequest HT (2)	2	669.904	0.27	92.8432	30610	30610	Q6P1N0	ArgAcetylD3	RYGELTKLIR	10	2	92.843	661	10		N-Term(ArgAcetylD3);K6(Acetyl:2H(3))	Acetyl:2H(3)@Any N-term;Acetyl:2H(3)@K	0;7	27	QE	0.407664	YGELTKLIR	0.903157	0.91759	0.739735	0.430116	6	0.383747	0.951816	1	RR	TRUE	trypsin	2	11	3	0.214286	0.153846
High	[R].aPEEELPPLDPEEIR.[K]	HCD	4	0.00012	0.00045	0.745	0.53	1	Sequest HT (2)	3	645.668	-0.77	92.9179	30641	30641	Q8IY67	ArgAcetylD3	RAPEEELPPLDPEEIR	16	3	92.918	662	16		N-Term(ArgAcetylD3)	Acetyl:2H(3)@Any N-term	0	27	QE	0.408345	APEEELPPLDPEEIR	0.956342	0.962843	0.825911	0.842567	6	0.998952	0.925395	1	RR	TRUE	trypsin	1	16	2	0.111111	0.0588235
High	[R].aEDGSVIDYELIDQDAR.[D]	HCD	5.89	1.3e-05	3.3e-09	3	0.76	1	Sequest HT (2)	2	1055.51	0.73	93.2886	30799	30799	P07355	ArgAcetylD3	RAEDGSVIDYELIDQDAR	18	2	93.289	663	18		N-Term(ArgAcetylD3)	Acetyl:2H(3)@Any N-term	0	27	QE	0.411718	AEDGSVIDYELIDQDAR	0.99471	0.995466	0.939352	0.708879	11	0.99636	0.993511	1	RR	TRUE	trypsin	6	19	1	0.05	0.24
High	[R].aEDGSVIDYELIDQDAR.[D]	HCD	5.37	5.8e-05	0.00016	0.943	0.58	1	Sequest HT (2)	3	704.009	-0.32	93.4213	30859	30859	P07355	ArgAcetylD3	RAEDGSVIDYELIDQDAR	18	3	93.421	664	18		N-Term(ArgAcetylD3)	Acetyl:2H(3)@Any N-term	0	27	QE	0.412918	AEDGSVIDYELIDQDAR	0.983372	0.986504	0.895291	0.786388	9	0.99195	0.976749	1	RR	TRUE	trypsin	1	19	4	0.173913	0.05
High	[R].aEDGSVIDYELIDQDAR.[D]	HCD	6.06	1.3e-05	2.7e-09	3.04	0.76	1	Sequest HT (2)	2	1055.51	3.15	94.5213	31320	31320	P07355	ArgAcetylD3	RAEDGSVIDYELIDQDAR	18	2	94.521	665	18		N-Term(ArgAcetylD3)	Acetyl:2H(3)@Any N-term	0	27	QE	0.422918	AEDGSVIDYELIDQDAR	0.906883	0.918209	0.74073	0.676547	12	0.904063	0.955879	1	RR	TRUE	trypsin	7	19	1	0.05	0.269231
High	[R].kGGLDYLkQVENETR.[N]	HCD	4.41	5.8e-05	0.00016	0.945	0.68	1	Sequest HT (2)	3	681.039	0.07	95.6954	31814	31814	Q86V48	ArgAcetylD3	RKGGLDYLKQVENETR	16	3	95.695	666	16		N-Term(ArgAcetylD3);K1(Acetyl:2H(3));K8(Acetyl:2H(3))	Acetyl:2H(3)@Any N-term;Acetyl:2H(3)@K;Acetyl:2H(3)@K	0;2;9	27	QE	0.433591	KGGLDYLKQVENETR	0.989533	0.991362	0.916265	0.851542	8	0.988646	0.993126	1	RR	TRUE	trypsin	2	17	1	0.0555556	0.105263
High	[R].yADLTEDQLPScESLkDTIAR.[A]	HCD	5.3	1.3e-05	4e-05	1.22	0.63	1	Sequest HT (2)	3	891.105	-5.29	96.407	32118	32118	P18669	ArgAcetylD3	RYADLTEDQLPSCESLKDTIAR	22	3	96.407	667	22		N-Term(ArgAcetylD3);C12(Carbamidomethyl);K16(Acetyl:2H(3))	Acetyl:2H(3)@Any N-term;Carbamidomethyl@C;Acetyl:2H(3)@K	0;13;17	27	QE	0.440064	YADLTEDQLPSCESLKDTIAR	0.987765	0.989569	0.907969	0.775985	10	0.983698	0.995361	1	RR	TRUE	trypsin	1	23	5	0.178571	0.0416667
High	[R].aPFDLFENR.[K]	HCD	3.29	5.5e-05	0.00015	0.966	0.54	1	Sequest HT (2)	2	655.34	-0.31	96.7508	32257	32257	P07900	ArgAcetylD3	RAPFDLFENR	10	2	96.751	668	10		N-Term(ArgAcetylD3)	Acetyl:2H(3)@Any N-term	0	27	QE	0.443191	APFDLFENR	0.909773	0.930769	0.761723	0.769755	6	0.874934	0.938522	1	RR	TRUE	trypsin	0	15	2	0.117647	0
High	[R].aPFDLFENR.[K]	HCD	1.85	0.0031	0.04	0.149	0.37	1	Sequest HT (2)	2	655.338	-3.01	97.2833	32485	32485	P07900	ArgAcetylD3	RAPFDLFENR	10	2	97.283	669	10		N-Term(ArgAcetylD3)	Acetyl:2H(3)@Any N-term	0	27	QE	0.448027	APFDLFENR	0.865557	0.887914	0.695692	0.553024	5	0.869511	0.903951	1	RR	TRUE	trypsin	0	11	6	0.352941	0
High	[R].aMkTVFGVEPDLTR.[E]	HCD	4.52	3.2e-05	7.8e-05	1.09	0.57	1	Sequest HT (2)	3	603.999	0.72	100.017	33656	33656	Q96KP4	ArgAcetylD3	RAMKTVFGVEPDLTR	15	3	100.017	670	15		N-Term(ArgAcetylD3);K3(Acetyl:2H(3))	Acetyl:2H(3)@Any N-term;Acetyl:2H(3)@K	0;4	27	QE	0.472882	AMKTVFGVEPDLTR	0.912859	0.930982	0.762093	0.736398	10	0.815075	0.94956	1	RR	TRUE	trypsin	1	18	3	0.142857	0.0526316
High	[R].fSDQFPLPLkER.[L]	HCD	3.52	2.3e-05	5e-05	1.18	0.52	1	Sequest HT (2)	2	861.974	-2.31	100.84	34000	34000	Q92973	ArgAcetylD3	RFSDQFPLPLKER	13	2	100.84	671	13		N-Term(ArgAcetylD3);K10(Acetyl:2H(3))	Acetyl:2H(3)@Any N-term;Acetyl:2H(3)@K	0;11	27	QE	0.480364	FSDQFPLPLKER	0.76846	0.80216	0.592632	0.337223	8	0.810825	0.729259	1	RR	TRUE	trypsin	5	10	3	0.230769	0.333333
High	[R].fSDQFPLPLkER.[L]	HCD	3.29	0.00011	0.0004	0.768	0.64	1	Sequest HT (2)	3	574.986	-0.89	100.911	34030	34030	Q92973	ArgAcetylD3	RFSDQFPLPLKER	13	3	100.911	672	13		N-Term(ArgAcetylD3);K10(Acetyl:2H(3))	Acetyl:2H(3)@Any N-term;Acetyl:2H(3)@K	0;11	27	QE	0.481009	FSDQFPLPLKER	0.979683	0.982402	0.880391	0.440024	6	0.977354	0.984776	1	RR	TRUE	trypsin	3	11	5	0.3125	0.214286
High	[R].lQQTQAQVDEVVDIMR.[V]	HCD	6.63	1.3e-05	5.8e-07	2.03	0.62	1	Sequest HT (2)	3	692.032	1.19	101.235	34166	34166	P63027	ArgAcetylD3	RLQQTQAQVDEVVDIMR	17	3	101.235	673	17		N-Term(ArgAcetylD3)	Acetyl:2H(3)@Any N-term	0	27	QE	0.483955	LQQTQAQVDEVVDIMR	0.993767	0.995418	0.939034	0.855517	17	0.98715	0.997677	1	RR	TRUE	trypsin	3	26	1	0.037037	0.103448
High	[R].lQQTQAQVDEVVDIMR.[V]	HCD	2.35	7.2e-05	0.00025	0.858	0.43	1	Sequest HT (2)	2	1037.54	0.44	101.292	34190	34190	P63027	ArgAcetylD3	RLQQTQAQVDEVVDIMR	17	2	101.292	674	17		N-Term(ArgAcetylD3)	Acetyl:2H(3)@Any N-term	0	27	QE	0.484473	LQQTQAQVDEVVDIMR	0.912181	0.92098	0.745219	0.690476	6	0.979774	0.885088	1	RR	TRUE	trypsin	4	11	1	0.0833333	0.266667
High	[R].lQQTQAQVDEVVDIMR.[V]	HCD	6.37	1.3e-05	3.4e-07	2.12	0.58	1	Sequest HT (2)	3	692.031	0.22	101.334	34207	34207	P63027	ArgAcetylD3	RLQQTQAQVDEVVDIMR	17	3	101.334	675	17		N-Term(ArgAcetylD3)	Acetyl:2H(3)@Any N-term	0	27	QE	0.484855	LQQTQAQVDEVVDIMR	0.989603	0.992153	0.920195	0.91337	16	0.982456	0.99478	1	RR	TRUE	trypsin	1	26	1	0.037037	0.037037
High	[R].mPGQcSVLLFPGQGSQVVGMGR.[G]	HCD	4.72	4.2e-05	9e-05	1.06	0.63	1	Sequest HT (2)	3	836.086	-5.29	102.381	34642	34642	Q8IVS2	ArgAcetylD3	RMPGQCSVLLFPGQGSQVVGMGR	23	3	102.381	676	23		N-Term(ArgAcetylD3);C5(Carbamidomethyl)	Acetyl:2H(3)@Any N-term;Carbamidomethyl@C	0;6	27	QE	0.494373	MPGQCSVLLFPGQGSQVVGMGR	0.97014	0.973936	0.854333	0.653535	8	0.987933	0.964576	1	RR	TRUE	trypsin	1	22	9	0.290323	0.0434783
High	[R].kGLAFLDELR.[Q]	HCD	3.75	1.3e-05	3e-05	1.28	0.48	1	Sequest HT (2)	2	704.416	1.31	104.682	35587	35587	Q68CP9	ArgAcetylD3	RKGLAFLDELR	11	2	104.682	677	11		N-Term(ArgAcetylD3);K1(Acetyl:2H(3))	Acetyl:2H(3)@Any N-term;Acetyl:2H(3)@K	0;2	27	QE	0.515291	KGLAFLDELR	0.969084	0.975314	0.858253	0.80985	6	0.958528	0.976291	1	RR	TRUE	trypsin	0	15	2	0.117647	0
High	[R].kFLPLFDR.[V]	HCD	2.76	0.00022	0.0011	0.58	0.38	1	Sequest HT (2)	2	641.383	-0.21	105.096	35758	35758	P61604	ArgAcetylD3	RKFLPLFDR	9	2	105.096	678	9		N-Term(ArgAcetylD3);K1(Acetyl:2H(3))	Acetyl:2H(3)@Any N-term;Acetyl:2H(3)@K	0;2	27	QE	0.519055	KFLPLFDR	0.978818	0.981971	0.87893	0.616569	7	0.878398	0.992295	0	FR	TRUE	trypsin	2	11	2	0.153846	0.153846
Low	[R].lTVNEAVkEGVVGPELHHkLLSAER.[A]	HCD	1.5	0.38	1	-0.562	0.12	1	Sequest HT (2)	3	1006.24	1.13	105.517	35925	35925	Q15149	ArgAcetylD3	RLTVNEAVKEGVVGPELHHKLLSAER	26	3	105.517	679	26		N-Term(ArgAcetylD3);K8(Acetyl:2H(3));K19(Acetyl:2H(3))	Acetyl:2H(3)@Any N-term;Acetyl:2H(3)@K;Acetyl:2H(3)@K	0;9;20	27	QE	0.522882	LTVNEAVKEGVVGPELHHKLLSAER	0.309882	0.359529	0.234125	-0.67802	3	0.154068	0.357965	1	RR	TRUE	trypsin	2	4	46	0.92	0.333333
High	[R].gMFPDNFVkEIkR.[E]	HCD	2.31	0.0033	0.044	0.139	0.42	1	Sequest HT (2)	2	936.511	-0.16	106.707	36425	36425	Q9Y5K6	ArgAcetylD3	RGMFPDNFVKEIKR	14	2	106.707	680	14		N-Term(ArgAcetylD3);K9(Acetyl:2H(3));K12(Acetyl:2H(3))	Acetyl:2H(3)@Any N-term;Acetyl:2H(3)@K;Acetyl:2H(3)@K	0;10;13	27	QE	0.5337	GMFPDNFVKEIKR	0.881564	0.897004	0.708523	0.172116	9	0.907666	0.897256	1	RR	TRUE	trypsin	4	11	8	0.421053	0.266667
Low	[R].aAQLcGAGMAAVVDkIR.[E]	HCD	2.15	0.66	1	-0.874	0.03	1	Sequest HT (2)	3	659.691	-2.96	106.823	36472	36472	P19367	ArgAcetylD3	RAAQLCGAGMAAVVDKIR	18	3	106.823	681	18		N-Term(ArgAcetylD3);C5(Carbamidomethyl);K15(Acetyl:2H(3))	Acetyl:2H(3)@Any N-term;Carbamidomethyl@C;Acetyl:2H(3)@K	0;6;16	27	QE	0.534755	AAQLCGAGMAAVVDKIR	0.022424	0.14723	0.0940713	-0.631465	3	0.0107328	0.0355697	1	RR	TRUE	trypsin	3	6	25	0.806452	0.333333
High	[R].qLLLQkLLQR.[K]	HCD	3.84	1.3e-05	2e-05	1.36	0.68	1	Sequest HT (2)	2	749.989	0.07	107.262	36653	36653	Q9UJV9	ArgAcetylD3	RQLLLQKLLQR	11	2	107.262	682	11		N-Term(ArgAcetylD3);K6(Acetyl:2H(3))	Acetyl:2H(3)@Any N-term;Acetyl:2H(3)@K	0;7	27	QE	0.538745	QLLLQKLLQR	0.901277	0.914902	0.735464	0.533959	7	0.554577	0.949644	1	RR	TRUE	trypsin	1	15	4	0.210526	0.0625
High	[R].qLLLQkLLQR.[K]	HCD	4.22	0.00013	0.00056	0.706	0.72	1	Sequest HT (2)	3	500.329	2.69	107.3	36668	36668	Q9UJV9	ArgAcetylD3	RQLLLQKLLQR	11	3	107.3	683	11		N-Term(ArgAcetylD3);K6(Acetyl:2H(3))	Acetyl:2H(3)@Any N-term;Acetyl:2H(3)@K	0;7	27	QE	0.539091	QLLLQKLLQR	0.989999	0.992517	0.922072	0.84531	7	0.997474	0.98345	1	RR	TRUE	trypsin	0	15	3	0.166667	0
High	[R].dVDFELIkVEGkVGGR.[L]	HCD	5.34	5e-05	0.00011	1.03	0.58	1	Sequest HT (2)	3	684.721	2.61	108.484	37150	37150	P48643	ArgAcetylD3	RDVDFELIKVEGKVGGR	17	3	108.484	684	17		N-Term(ArgAcetylD3);K8(Acetyl:2H(3));K12(Acetyl:2H(3))	Acetyl:2H(3)@Any N-term;Acetyl:2H(3)@K;Acetyl:2H(3)@K	0;9;13	27	QE	0.549855	DVDFELIKVEGKVGGR	0.994811	0.995641	0.94054	0.700549	12	0.994954	0.994792	1	RR	TRUE	trypsin	6	18	1	0.0526316	0.25
High	[R].aASGYPVkVPLEVQEADEAkLQQTEAELR.[K]	HCD	8.23	1.3e-05	5.7e-10	3.33	0.74	1	Sequest HT (2)	3	1154.28	1.76	108.698	37238	37238	P26640	ArgAcetylD3	RAASGYPVKVPLEVQEADEAKLQQTEAELR	30	3	108.698	685	30		N-Term(ArgAcetylD3);K8(Acetyl:2H(3));K20(Acetyl:2H(3))	Acetyl:2H(3)@Any N-term;Acetyl:2H(3)@K;Acetyl:2H(3)@K	0;9;21	27	QE	0.5518	AASGYPVKVPLEVQEADEAKLQQTEAELR	0.971246	0.975243	0.858047	0.748072	19	0.98237	0.953773	1	RR	TRUE	trypsin	7	31	2	0.0606061	0.184211
High	[R].fDEILEASDGIMVAR.[G]	HCD	4.04	1.3e-05	5.6e-06	1.6	0.54	1	Sequest HT (2)	2	933.975	-1.22	108.775	37268	37268	P14618	ArgAcetylD3	RFDEILEASDGIMVAR	16	2	108.775	686	16		N-Term(ArgAcetylD3)	Acetyl:2H(3)@Any N-term	0	27	QE	0.5525	FDEILEASDGIMVAR	0.964567	0.968217	0.839066	0.712476	11	0.953972	0.972106	1	RR	TRUE	trypsin	2	19	3	0.136364	0.0952381
High	[R].aASGYPVkVPLEVQEADEAkLQQTEAELR.[K]	HCD	6.51	1.3e-05	9.2e-08	2.37	0.73	1	Sequest HT (2)	4	865.962	-0.76	108.837	37295	37295	P26640	ArgAcetylD3	RAASGYPVKVPLEVQEADEAKLQQTEAELR	30	4	108.837	687	30		N-Term(ArgAcetylD3);K8(Acetyl:2H(3));K20(Acetyl:2H(3))	Acetyl:2H(3)@Any N-term;Acetyl:2H(3)@K;Acetyl:2H(3)@K	0;9;21	27	QE	0.553064	AASGYPVKVPLEVQEADEAKLQQTEAELR	0.981803	0.984148	0.886497	0.780256	10	0.973411	0.995342	1	RR	TRUE	trypsin	4	24	3	0.111111	0.142857
High	[R].vYATILNAGTNTDGFkEQGVTFPSGDIQEQLIR.[S]	HCD	7.48	1.3e-05	3.9e-09	2.97	0.65	1	Sequest HT (2)	4	957.997	-0.57	108.887	37315	37315	P49327	ArgAcetylD3	RVYATILNAGTNTDGFKEQGVTFPSGDIQEQLIR	34	4	108.887	688	34		N-Term(ArgAcetylD3);K16(Acetyl:2H(3))	Acetyl:2H(3)@Any N-term;Acetyl:2H(3)@K	0;17	27	QE	0.553518	VYATILNAGTNTDGFKEQGVTFPSGDIQEQLIR	0.983303	0.984372	0.887302	0.704453	18	0.974339	0.985333	1	RR	TRUE	trypsin	4	28	6	0.176471	0.125
High	[R].aQFEGIVTDLIR.[T]	HCD	4.91	1.3e-05	3.3e-06	1.7	0.67	1	Sequest HT (2)	3	521.629	-0.31	109.384	37520	37520	P38646	ArgAcetylD3	RAQFEGIVTDLIR	13	3	109.384	689	13		N-Term(ArgAcetylD3)	Acetyl:2H(3)@Any N-term	0	27	QE	0.558036	AQFEGIVTDLIR	0.99474	0.995723	0.941101	0.77741	10	0.996375	0.993777	0	TR	TRUE	trypsin	3	18	1	0.0526316	0.142857
High	[R].aQFEGIVTDLIR.[T]	HCD	3.05	1.3e-05	2.3e-05	1.33	0.48	1	Sequest HT (2)	2	781.94	0.32	109.437	37542	37542	P38646	ArgAcetylD3	RAQFEGIVTDLIR	13	2	109.437	690	13		N-Term(ArgAcetylD3)	Acetyl:2H(3)@Any N-term	0	27	QE	0.558518	AQFEGIVTDLIR	0.944986	0.953266	0.804604	0.593139	8	0.962772	0.954572	0	TR	TRUE	trypsin	1	13	4	0.235294	0.0714286
High	[R].gDVVPkDVNAAIATIkTkR.[TS]	HCD	6.9	1.3e-05	3e-08	2.58	0.78	1	Sequest HT (2)	3	778.129	0	109.477	37558	37558	Q6PEY2; P68363; P0DPH8; Q71U36; Q9BQE3	ArgAcetylD3	RGDVVPKDVNAAIATIKTKR	20	3	109.477	691	20		N-Term(ArgAcetylD3);K6(Acetyl:2H(3));K16(Acetyl:2H(3));K18(Acetyl:2H(3))	Acetyl:2H(3)@Any N-term;Acetyl:2H(3)@K;Acetyl:2H(3)@K;Acetyl:2H(3)@K	0;7;17;19	27	QE	0.558882	GDVVPKDVNAAIATIKTKR	0.98279	0.984902	0.889236	0.785181	18	0.990939	0.993919	0	YR;YR;YR;YR;YR;YR	TRUE	trypsin	4	28	3	0.0967742	0.125
High	[R].gDVVPkDVNAAIATIkTkR.[TS]	HCD	3.42	1.3e-05	1.3e-06	1.87	0.69	1	Sequest HT (2)	2	1166.69	-0.93	109.58	37603	37603	Q6PEY2; P68363; P0DPH8; Q71U36; Q9BQE3	ArgAcetylD3	RGDVVPKDVNAAIATIKTKR	20	2	109.58	692	20		N-Term(ArgAcetylD3);K6(Acetyl:2H(3));K16(Acetyl:2H(3));K18(Acetyl:2H(3))	Acetyl:2H(3)@Any N-term;Acetyl:2H(3)@K;Acetyl:2H(3)@K;Acetyl:2H(3)@K	0;7;17;19	27	QE	0.559818	GDVVPKDVNAAIATIKTKR	0.981343	0.982923	0.88218	0.758072	4	0.975432	0.989829	0	YR;YR;YR;YR;YR;YR	TRUE	trypsin	1	8	3	0.272727	0.111111
High	[R].qQLEEQTVELSTEVQSLYR.[E]	HCD	6.48	1.3e-05	1.2e-06	1.88	0.63	1	Sequest HT (2)	3	827.76	-0.52	109.991	37779	37779	Q92878	ArgAcetylD3	RQQLEEQTVELSTEVQSLYR	20	3	109.991	693	20		N-Term(ArgAcetylD3)	Acetyl:2H(3)@Any N-term	0	27	QE	0.563555	QQLEEQTVELSTEVQSLYR	0.99362	0.995278	0.938107	0.773575	15	0.989916	0.996537	1	RR	TRUE	trypsin	2	27	5	0.15625	0.0689655
High	[R].aEDGSVIDYELIDQDARDLYDAGVkR.[K]	HCD	6.39	1.3e-05	8.3e-07	1.96	0.55	1	Sequest HT (2)	4	793.895	-2.63	110.001	37783	37783	P07355	ArgAcetylD3	RAEDGSVIDYELIDQDARDLYDAGVKR	27	4	110.001	694	27		N-Term(ArgAcetylD3);K25(Acetyl:2H(3))	Acetyl:2H(3)@Any N-term;Acetyl:2H(3)@K	0;26	27	QE	0.563645	AEDGSVIDYELIDQDARDLYDAGVKR	0.750482	0.788332	0.57811	0.308439	16	0.299067	0.939244	1	RR	TRUE	trypsin	10	24	10	0.294118	0.294118
High	[R].qPNISVMQSPLVGVTSTPGTGQSMFSPASIGQPR.[K]	HCD	8	1.3e-05	3.7e-10	3.41	0.78	1	Sequest HT (2)	3	1219.96	0.33	110.112	37827	37827	Q8NFH5	ArgAcetylD3	RQPNISVMQSPLVGVTSTPGTGQSMFSPASIGQPR	35	3	110.112	695	35		N-Term(ArgAcetylD3)	Acetyl:2H(3)@Any N-term	0	27	QE	0.564655	QPNISVMQSPLVGVTSTPGTGQSMFSPASIGQPR	0.98308	0.985611	0.891874	0.888612	19	0.983481	0.98654	1	RR	TRUE	trypsin	2	39	3	0.0714286	0.0487805
High	[R].tEkkLkDVLLQVDDER.[N]	HCD	6.07	1.3e-05	5.9e-07	2.02	0.78	1	Sequest HT (2)	3	755.767	1.77	110.435	37960	37960	P35579	ArgAcetylD3	RTEKKLKDVLLQVDDER	17	3	110.435	696	17		N-Term(ArgAcetylD3);K3(Acetyl:2H(3));K4(Acetyl:2H(3));K6(Acetyl:2H(3))	Acetyl:2H(3)@Any N-term;Acetyl:2H(3)@K;Acetyl:2H(3)@K;Acetyl:2H(3)@K	0;4;5;7	27	QE	0.567591	TEKKLKDVLLQVDDER	0.939816	0.954865	0.808	0.861882	15	0.994264	0.910266	1	RR	TRUE	trypsin	3	25	1	0.0384615	0.107143
High	[R].qEQIQAMPLADSQAVREQLRQEQALLEEIER.[H]	HCD	4.01	1.3e-05	8.4e-06	1.52	0.49	1	Sequest HT (2)	4	963.501	-1.75	110.632	38039	38039	Q15149	ArgAcetylD3	RQEQIQAMPLADSQAVREQLRQEQALLEEIER	32	4	110.632	697	32		N-Term(ArgAcetylD3)	Acetyl:2H(3)@Any N-term	0	27	QE	0.569382	QEQIQAMPLADSQAVREQLRQEQALLEEIER	0.832038	0.836794	0.631145	0.669029	4	0.840459	0.702765	1	RR	TRUE	trypsin	0	5	8	0.615385	0
High	[R].lGPLLLDPSLAVR.[E]	HCD	3.1	0.00013	0.0005	0.726	0.49	1	Sequest HT (2)	2	782.983	-1.18	111.022	38197	38197	Q7Z4Q2	ArgAcetylD3	RLGPLLLDPSLAVR	14	2	111.022	698	14		N-Term(ArgAcetylD3)	Acetyl:2H(3)@Any N-term	0	27	QE	0.572927	LGPLLLDPSLAVR	0.998165	0.998281	0.962665	0.671135	6	0.997406	0.999168	1	RR	TRUE	trypsin	2	13	2	0.133333	0.133333
High	[R].kPTRLELkLDDIEEFENIR.[K]	HCD	5.48	1.3e-05	6e-07	2.02	0.68	1	Sequest HT (2)	3	883.825	1.38	111.121	38240	38240	Q8NHZ8	ArgAcetylD3	RKPTRLELKLDDIEEFENIR	20	3	111.121	699	20		N-Term(ArgAcetylD3);K1(Acetyl:2H(3));K8(Acetyl:2H(3))	Acetyl:2H(3)@Any N-term;Acetyl:2H(3)@K;Acetyl:2H(3)@K	0;2;9	27	QE	0.573827	KPTRLELKLDDIEEFENIR	0.952542	0.959644	0.818523	0.670882	9	0.947595	0.965569	1	RR	TRUE	trypsin	1	17	6	0.26087	0.0555556
High	[R].eLESQISELQEDLESER.[A]	HCD	4.71	1.3e-05	1e-07	2.36	0.55	1	Sequest HT (2)	2	1118.04	-3.42	112.672	38897	38897	P35579	ArgAcetylD3	RELESQISELQEDLESER	18	2	112.672	700	18		N-Term(ArgAcetylD3)	Acetyl:2H(3)@Any N-term	0	27	QE	0.587927	ELESQISELQEDLESER	0.964306	0.969165	0.841497	0.699126	7	0.940979	0.974959	0	IR	TRUE	trypsin	2	13	3	0.1875	0.133333
High	[R].eALEkTEkQLEAIDQLHLEYAkR.[A]	HCD	9.04	1.3e-05	3.4e-07	2.13	0.6	1	Sequest HT (2)	4	773.675	-0.84	113.54	39264	39264	O43707	ArgAcetylD3	REALEKTEKQLEAIDQLHLEYAKR	24	4	113.54	701	24		N-Term(ArgAcetylD3);K5(Acetyl:2H(3));K8(Acetyl:2H(3));K22(Acetyl:2H(3))	Acetyl:2H(3)@Any N-term;Acetyl:2H(3)@K;Acetyl:2H(3)@K;Acetyl:2H(3)@K	0;6;9;23	27	QE	0.595818	EALEKTEKQLEAIDQLHLEYAKR	0.97114	0.976963	0.863087	0.741727	11	0.950984	0.982765	1	RR	TRUE	trypsin	2	29	5	0.147059	0.0645161
High	[R].tEkkLkDVLLQVDDER.[N]	HCD	5.95	1.3e-05	4.5e-06	1.64	0.72	1	Sequest HT (2)	3	755.768	1.83	113.697	39328	39328	P35579	ArgAcetylD3	RTEKKLKDVLLQVDDER	17	3	113.697	702	17		N-Term(ArgAcetylD3);K3(Acetyl:2H(3));K4(Acetyl:2H(3));K6(Acetyl:2H(3))	Acetyl:2H(3)@Any N-term;Acetyl:2H(3)@K;Acetyl:2H(3)@K;Acetyl:2H(3)@K	0;4;5;7	27	QE	0.597245	TEKKLKDVLLQVDDER	0.986799	0.990039	0.910067	0.817491	13	0.981428	0.990881	1	RR	TRUE	trypsin	2	23	3	0.115385	0.08
High	[R].lQEALAAkEAADAELGQLR.[A]	HCD	6.73	1.3e-05	1.4e-07	2.29	0.58	1	Sequest HT (2)	3	748.414	0.67	113.719	39337	39337	Q08378	ArgAcetylD3	RLQEALAAKEAADAELGQLR	20	3	113.719	703	20		N-Term(ArgAcetylD3);K8(Acetyl:2H(3))	Acetyl:2H(3)@Any N-term;Acetyl:2H(3)@K	0;9	27	QE	0.597445	LQEALAAKEAADAELGQLR	0.989302	0.991705	0.917943	0.872386	17	0.981753	0.993227	1	RR	TRUE	trypsin	1	29	3	0.09375	0.0333333
High	[R].eALEkTEkQLEAIDQLHLEYAkR.[A]	HCD	8.51	1.3e-05	5.2e-13	4.65	0.75	1	Sequest HT (2)	3	1031.23	1.79	114.031	39464	39464	O43707	ArgAcetylD3	REALEKTEKQLEAIDQLHLEYAKR	24	3	114.031	704	24		N-Term(ArgAcetylD3);K5(Acetyl:2H(3));K8(Acetyl:2H(3));K22(Acetyl:2H(3))	Acetyl:2H(3)@Any N-term;Acetyl:2H(3)@K;Acetyl:2H(3)@K;Acetyl:2H(3)@K	0;6;9;23	27	QE	0.600282	EALEKTEKQLEAIDQLHLEYAKR	0.973251	0.980837	0.875169	0.822565	24	0.980877	0.970523	1	RR	TRUE	trypsin	3	41	4	0.0888889	0.0681818
High	[R].aASGYPVkVPLEVQEADEAkLQQTEAELR.[K]	HCD	8.02	1.3e-05	5.8e-10	3.33	0.75	1	Sequest HT (2)	3	1154.28	-1.95	114.047	39471	39471	P26640	ArgAcetylD3	RAASGYPVKVPLEVQEADEAKLQQTEAELR	30	3	114.047	705	30		N-Term(ArgAcetylD3);K8(Acetyl:2H(3));K20(Acetyl:2H(3))	Acetyl:2H(3)@Any N-term;Acetyl:2H(3)@K;Acetyl:2H(3)@K	0;9;21	27	QE	0.600427	AASGYPVKVPLEVQEADEAKLQQTEAELR	0.993734	0.9946	0.93381	0.795737	17	0.996244	0.990517	1	RR	TRUE	trypsin	7	32	1	0.030303	0.179487
High	[R].iQELEDLLAkEkDNSR.[M]	HCD	6.48	1.3e-05	6.5e-08	2.44	0.66	1	Sequest HT (2)	3	731.4	-0.59	114.359	39598	39598	P20700	ArgAcetylD3	RIQELEDLLAKEKDNSR	17	3	114.359	706	17		N-Term(ArgAcetylD3);K10(Acetyl:2H(3));K12(Acetyl:2H(3))	Acetyl:2H(3)@Any N-term;Acetyl:2H(3)@K;Acetyl:2H(3)@K	0;11;13	27	QE	0.603264	IQELEDLLAKEKDNSR	0.992697	0.993779	0.928952	0.858562	14	0.990881	0.997694	0	ER	TRUE	trypsin	2	25	2	0.0740741	0.0740741
High	[R].vDAENRLQTMkEELDFQkNIYSEELR.[E]	HCD	4.26	1.3e-05	5e-07	2.05	0.65	1	Sequest HT (2)	3	1163.92	-2.54	115.374	40015	40015	P02545	ArgAcetylD3	RVDAENRLQTMKEELDFQKNIYSEELR	27	3	115.374	707	27		N-Term(ArgAcetylD3);K11(Acetyl:2H(3));K18(Acetyl:2H(3))	Acetyl:2H(3)@Any N-term;Acetyl:2H(3)@K;Acetyl:2H(3)@K	0;12;19	27	QE	0.612491	VDAENRLQTMKEELDFQKNIYSEELR	0.93771	0.943733	0.785425	0.780924	7	0.959837	0.905518	1	RR	TRUE	trypsin	2	17	3	0.15	0.105263
High	[R].iVSQLLTLmDGLkQR.[A]	HCD	5.13	1.3e-05	5.3e-06	1.61	0.64	1	Sequest HT (2)	3	659.72	1.75	116.009	40272	40272	P55072	ArgAcetylD3	RIVSQLLTLMDGLKQR	16	3	116.009	708	16		N-Term(ArgAcetylD3);M9(Oxidation);K13(Acetyl:2H(3))	Acetyl:2H(3)@Any N-term;Oxidation@M;Acetyl:2H(3)@K	0;10;14	27	QE	0.618264	IVSQLLTLMDGLKQR	0.878935	0.902618	0.716716	0.549236	9	0.784821	0.975328	1	RR	TRUE	trypsin	5	18	4	0.181818	0.217391
High	[R].gkNVVHQLSVTLEDLYNGATR.[K]	HCD	4.27	1.3e-05	1.5e-05	1.4	0.63	1	Sequest HT (2)	4	640.85	0.97	116.108	40313	40313	P31689	ArgAcetylD3	RGKNVVHQLSVTLEDLYNGATR	22	4	116.108	709	22		N-Term(ArgAcetylD3);K2(Acetyl:2H(3))	Acetyl:2H(3)@Any N-term;Acetyl:2H(3)@K	0;3	27	QE	0.619164	GKNVVHQLSVTLEDLYNGATR	0.990733	0.992113	0.91999	0.880024	15	0.979779	0.996701	1	RR	TRUE	trypsin	1	22	2	0.0833333	0.0434783
Low	[R].nNTITTTSSkR.[K]	HCD	0.98	0.7	1	-0.963	0.03	1	Sequest HT (2)	2	734.899	-5.46	116.952	40658	40658	O75179	ArgAcetylD3	RNNTITTTSSKR	12	2	116.952	710	12		N-Term(ArgAcetylD3);K10(Acetyl:2H(3))	Acetyl:2H(3)@Any N-term;Acetyl:2H(3)@K	0;11	27	QE	0.626836	NNTITTTSSKR	0.623033	0.651069	0.451358	-0.0164906	2	-0.0742404	0.811658	1	KR	TRUE	trypsin	3	1	6	0.857143	0.75
High	[R].aEQDSTTVAAFASSLVSGLNSSASEPAkEPAkkSR.[K]	HCD	7.21	1.3e-05	1.8e-09	3.11	0.78	1	Sequest HT (2)	4	965.255	2.49	117.662	40944	40944	Q86U44	ArgAcetylD3	RAEQDSTTVAAFASSLVSGLNSSASEPAKEPAKKSR	36	4	117.662	711	36		N-Term(ArgAcetylD3);K28(Acetyl:2H(3));K32(Acetyl:2H(3));K33(Acetyl:2H(3))	Acetyl:2H(3)@Any N-term;Acetyl:2H(3)@K;Acetyl:2H(3)@K;Acetyl:2H(3)@K	0;29;33;34	27	QE	0.633291	AEQDSTTVAAFASSLVSGLNSSASEPAKEPAKKSR	0.993081	0.993797	0.929055	0.905156	23	0.9855	0.996494	1	RR	TRUE	trypsin	3	38	1	0.025641	0.0731707
High	[R].eDIVDTMVFkPSDVMLVHFR.[N]	HCD	6.79	1.3e-05	6.2e-06	1.58	0.71	1	Sequest HT (2)	3	875.455	1.25	118.721	41367	41367	Q8WWM7	ArgAcetylD3	REDIVDTMVFKPSDVMLVHFR	21	3	118.721	712	21		N-Term(ArgAcetylD3);K10(Acetyl:2H(3))	Acetyl:2H(3)@Any N-term;Acetyl:2H(3)@K	0;11	27	QE	0.642918	EDIVDTMVFKPSDVMLVHFR	0.969176	0.972782	0.851129	0.845675	11	0.953278	0.973846	1	RR	TRUE	trypsin	3	23	0	0	0.115385
High	[R].vLQALEGLkMVEkDQDGGR.[K]	HCD	5.19	1.3e-05	5.6e-06	1.6	0.76	1	Sequest HT (2)	3	793.102	2.76	119.519	41687	41687	P39019	ArgAcetylD3	RVLQALEGLKMVEKDQDGGR	20	3	119.519	713	20		N-Term(ArgAcetylD3);K9(Acetyl:2H(3));K13(Acetyl:2H(3))	Acetyl:2H(3)@Any N-term;Acetyl:2H(3)@K;Acetyl:2H(3)@K	0;10;14	27	QE	0.650173	VLQALEGLKMVEKDQDGGR	0.929458	0.9443	0.786519	0.767245	13	0.991983	0.91109	1	RR	TRUE	trypsin	1	24	6	0.2	0.04
High	[R].lLISkLQDEFENR.[T]	HCD	3.97	5.8e-05	0.00018	0.919	0.75	1	Sequest HT (2)	3	617.679	-0.45	120.234	41971	41971	P78344	ArgAcetylD3	RLLISKLQDEFENR	14	3	120.234	714	14		N-Term(ArgAcetylD3);K5(Acetyl:2H(3))	Acetyl:2H(3)@Any N-term;Acetyl:2H(3)@K	0;6	27	QE	0.656673	LLISKLQDEFENR	0.985305	0.988049	0.901478	0.764706	9	0.97459	0.996578	1	RR	TRUE	trypsin	2	15	2	0.117647	0.117647
High	[R].vPVLGSLLNLPGIR.[S]	HCD	3.46	1.3e-05	3.4e-05	1.25	0.73	1	Sequest HT (2)	2	825.02	1.06	120.804	42188	42188	Q9Y3E0	ArgAcetylD3	RVPVLGSLLNLPGIR	15	2	120.804	715	15		N-Term(ArgAcetylD3)	Acetyl:2H(3)@Any N-term	0	27	QE	0.661855	VPVLGSLLNLPGIR	0.873501	0.889665	0.698124	0.748906	4	0.519389	0.964106	1	RR	TRUE	trypsin	1	9	2	0.181818	0.1
High	[R].vPVLGSLLNLPGIR.[S]	HCD	4.33	2.3e-05	5.5e-05	1.16	0.54	1	Sequest HT (2)	3	550.348	-1.06	120.973	42255	42255	Q9Y3E0	ArgAcetylD3	RVPVLGSLLNLPGIR	15	3	120.973	716	15		N-Term(ArgAcetylD3)	Acetyl:2H(3)@Any N-term	0	27	QE	0.663391	VPVLGSLLNLPGIR	0.987448	0.989447	0.907429	0.735543	10	0.985271	0.989192	1	RR	TRUE	trypsin	1	19	5	0.208333	0.05
High	[R].sTLEPVEkALRDAkLDkAQIHDLVLVGGSTR.[I]	HCD	4.1	1.3e-05	1.1e-05	1.48	0.63	1	Sequest HT (2)	4	924.778	2.29	121.512	42462	42462	P0DMV9	ArgAcetylD3	RSTLEPVEKALRDAKLDKAQIHDLVLVGGSTR	32	4	121.512	717	32		N-Term(ArgAcetylD3);K8(Acetyl:2H(3));K14(Acetyl:2H(3));K17(Acetyl:2H(3))	Acetyl:2H(3)@Any N-term;Acetyl:2H(3)@K;Acetyl:2H(3)@K;Acetyl:2H(3)@K	0;9;15;18	27	QE	0.668291	STLEPVEKALRDAKLDKAQIHDLVLVGGSTR	0.942005	0.94835	0.794498	0.627361	10	0.942179	0.943674	0	FR;FR	TRUE	trypsin	1	18	10	0.357143	0.0526316
Low	[R].aAQLcGAGMAAVVDkIR.[E]	HCD	1.94	0.59	1	-0.773	0.08	1	Sequest HT (2)	3	659.691	-2.76	128.381	45132	45132	P19367	ArgAcetylD3	RAAQLCGAGMAAVVDKIR	18	3	128.381	718	18		N-Term(ArgAcetylD3);C5(Carbamidomethyl);K15(Acetyl:2H(3))	Acetyl:2H(3)@Any N-term;Carbamidomethyl@C;Acetyl:2H(3)@K	0;6;16	27	QE	0.730736	AAQLCGAGMAAVVDKIR	0.111205	0.214072	0.137345	-0.452418	3	0.0106902	0.15839	1	RR	TRUE	trypsin	1	7	24	0.774194	0.125
High	[R].dADADAGGGADGGDGRGGHScR.[G]	HCD	1.89	0.001	0.0097	0.301	0.92	1	Sequest HT (2)	4	558.739	2.49	38.1534	6720	6720	Q14657	ArgAcetylD3	RDADADAGGGADGGDGRGGHSCR	23	4	38.153	719	23		N-Term(ArgAcetylD3);C21(Carbamidomethyl)	Acetyl:2H(3)@Any N-term;Carbamidomethyl@C	0;22	27	QE	-0.0895182	DADADAGGGADGGDGRGGHSCR	0.887325	0.897365	0.709042	0.194974	4	0.847418	0.973805	0	MR	TRUE	trypsin	1	9	17	0.653846	0.1
High	[R].dADADAGGGADGGDGRGGHScR.[G]	HCD	3.15	1.3e-05	4.4e-05	1.2	0.82	1	Sequest HT (2)	4	558.736	-1.68	38.6617	6903	6903	Q14657	ArgAcetylD3	RDADADAGGGADGGDGRGGHSCR	23	4	38.662	720	23		N-Term(ArgAcetylD3);C21(Carbamidomethyl)	Acetyl:2H(3)@Any N-term;Carbamidomethyl@C	0;22	27	QE	-0.0848909	DADADAGGGADGGDGRGGHSCR	0.933624	0.941184	0.78057	0.503919	11	0.901367	0.956071	0	MR	TRUE	trypsin	2	17	9	0.346154	0.105263
High	[R].lRPQQQQER.[A]	HCD	1.8	0.00076	0.0068	0.341	0.31	1	Sequest HT (2)	3	461.926	-0.55	40.9089	7732	7732	Q96PE2	ArgAcetylD3	RLRPQQQQER	10	3	40.909	721	10		N-Term(ArgAcetylD3)	Acetyl:2H(3)@Any N-term	0	27	QE	-0.0644636	LRPQQQQER	0.866258	0.890863	0.699799	0.575933	6	0.856287	0.872061	NA	NA	FALSE	trypsin	1	11	3	0.214286	0.0833333
High	[R].dDNSAANNSANEkER.[H]	HCD	1.84	0.0055	0.075	0.081	0.42	1	Sequest HT (2)	3	627.624	-0.77	41.8579	8090	8090	P78344	ArgAcetylD3	RDDNSAANNSANEKER	16	3	41.858	722	16		N-Term(ArgAcetylD3);K13(Acetyl:2H(3))	Acetyl:2H(3)@Any N-term;Acetyl:2H(3)@K	0;14	27	QE	-0.0558364	DDNSAANNSANEKER	0.654829	0.691143	0.485785	0.171937	1	-0.0735175	0.916743	1	RR	TRUE	trypsin	0	7	12	0.631579	0
High	[R].qLQEQQR.[Q]	HCD	2.71	0.00026	0.0014	0.548	0.26	1	Sequest HT (2)	2	565.81	1.65	42.1358	8191	8191	Q8N8S7	ArgAcetylD3	RQLQEQQR	8	2	42.136	723	8		N-Term(ArgAcetylD3)	Acetyl:2H(3)@Any N-term	0	27	QE	-0.0533091	QLQEQQR	0.814129	0.870879	0.672899	0.668035	6	0.489211	0.917252	1	RR	TRUE	trypsin	0	12	2	0.142857	0
High	[R].gASQAGmTGYGRPR.[Q]	HCD	2.63	8.3e-05	0.0003	0.825	0.56	1	Sequest HT (2)	3	542.606	1.04	42.3455	8259	8259	Q01995	ArgAcetylD3	RGASQAGMTGYGRPR	15	3	42.346	724	15		N-Term(ArgAcetylD3);M7(Oxidation)	Acetyl:2H(3)@Any N-term;Oxidation@M	0;8	27	QE	-0.0514	GASQAGMTGYGRPR	0.891272	0.908144	0.725001	0.513158	6	0.865486	0.908037	0	NR	TRUE	trypsin	2	11	5	0.3125	0.153846
Medium	[R].qSEDPScPNER.[Y]	HCD	0.83	0.019	0.29	-0.087	0.25	1	Sequest HT (2)	2	760.334	-1.2	42.4336	8291	8291	Q4KMQ2	ArgAcetylD3	RQSEDPSCPNER	12	2	42.434	725	12		N-Term(ArgAcetylD3);C7(Carbamidomethyl)	Acetyl:2H(3)@Any N-term;Carbamidomethyl@C	0;8	27	QE	-0.0506	QSEDPSCPNER	0.98815	0.988462	0.903201	0.421353	2	0.989458	0.996221	1	RR	TRUE	trypsin	0	5	6	0.545455	0
High	[R].tGcIGAkHR.[I]	HCD	3.54	5e-05	0.00011	1.02	0.57	1	Sequest HT (2)	3	415.897	0.28	42.4509	8298	8298	P62913	ArgAcetylD3	RTGCIGAKHR	10	3	42.451	726	10		N-Term(ArgAcetylD3);C3(Carbamidomethyl);K7(Acetyl:2H(3))	Acetyl:2H(3)@Any N-term;Carbamidomethyl@C;Acetyl:2H(3)@K	0;4;8	27	QE	-0.0504455	TGCIGAKHR	0.983235	0.986615	0.895722	0.705663	5	0.995459	0.977133	1	RR	TRUE	trypsin	3	14	2	0.125	0.176471
High	[R].gkNENESEkR.[E]	HCD	3.61	1.3e-05	1.2e-05	1.46	0.51	1	Sequest HT (2)	2	741.387	0.63	42.4928	8314	8314	P47813; O14602	ArgAcetylD3	RGKNENESEKR	11	2	42.493	727	11		N-Term(ArgAcetylD3);K2(Acetyl:2H(3));K9(Acetyl:2H(3))	Acetyl:2H(3)@Any N-term;Acetyl:2H(3)@K;Acetyl:2H(3)@K	0;3;10	27	QE	-0.0500636	GKNENESEKR	0.931654	0.942349	0.782775	0.520544	2	0.833958	0.957514	1	RR;RR	TRUE	trypsin	1	8	4	0.333333	0.111111
High	[R].gkNENESEkR.[E]	HCD	4.49	5e-05	0.00011	1.03	0.59	1	Sequest HT (2)	3	494.594	0.8	42.5171	8323	8323	P47813; O14602	ArgAcetylD3	RGKNENESEKR	11	3	42.517	728	11		N-Term(ArgAcetylD3);K2(Acetyl:2H(3));K9(Acetyl:2H(3))	Acetyl:2H(3)@Any N-term;Acetyl:2H(3)@K;Acetyl:2H(3)@K	0;3;10	27	QE	-0.0498455	GKNENESEKR	0.881093	0.903011	0.717296	0.1394	4	0.494361	0.999456	1	RR;RR	TRUE	trypsin	3	8	7	0.466667	0.272727
High	[R].hQAIGEkEAR.[A]	HCD	3.17	1.3e-05	2.1e-05	1.35	0.58	1	Sequest HT (2)	3	462.256	-0.96	42.6505	8375	8375	Q9UL54	ArgAcetylD3	RHQAIGEKEAR	11	3	42.65	729	11		N-Term(ArgAcetylD3);K7(Acetyl:2H(3))	Acetyl:2H(3)@Any N-term;Acetyl:2H(3)@K	0;8	27	QE	-0.0486364	HQAIGEKEAR	0.980568	0.984901	0.889231	0.828799	8	0.979482	0.98732	1	RR	TRUE	trypsin	0	17	3	0.15	0
High	[R].kQEERLR.[K]	HCD	2.43	0.0099	0.14	0.001	0.17	1	Sequest HT (2)	3	402.239	-0.48	42.681	8387	8387	Q9NYA3; A6NDK9; P0CG33; A6NDN3	ArgAcetylD3	RKQEERLR	8	3	42.681	730	8		N-Term(ArgAcetylD3);K1(Acetyl:2H(3))	Acetyl:2H(3)@Any N-term;Acetyl:2H(3)@K	0;2	27	QE	-0.0483545	KQEERLR	0.503135	0.595563	0.406142	0.418993	5	0.255643	0.483367	0	LR;LR;LR;LR	TRUE	trypsin	0	10	5	0.333333	0
High	[R].qMQDAAGR.[H]	HCD	1.78	0.00055	0.0046	0.387	0.18	1	Sequest HT (2)	2	539.269	0.25	42.9897	8506	8506	Q9Y6N7	ArgAcetylD3	RQMQDAAGR	9	2	42.99	731	9		N-Term(ArgAcetylD3)	Acetyl:2H(3)@Any N-term	0	27	QE	-0.0455455	QMQDAAGR	0.959987	0.965033	0.83115	0.479106	3	0.884696	0.984498	1	RR	TRUE	trypsin	1	9	4	0.307692	0.1
High	[R].nkTHTLcR.[C]	HCD	2.39	0.00034	0.0019	0.5	0.46	1	Sequest HT (2)	3	425.9	-0.41	43.2754	8621	8621	P61927	ArgAcetylD3	RNKTHTLCR	9	3	43.275	732	9		N-Term(ArgAcetylD3);K2(Acetyl:2H(3));C7(Carbamidomethyl)	Acetyl:2H(3)@Any N-term;Acetyl:2H(3)@K;Carbamidomethyl@C	0;3;8	27	QE	-0.0429545	NKTHTLCR	0.972985	0.978871	0.868901	0.730389	7	0.927218	0.984084	1	RR	TRUE	trypsin	1	11	2	0.153846	0.0833333
High	[R].dRDGYSYGSR.[S]	HCD	2.67	0.00018	0.00077	0.647	0.51	1	Sequest HT (2)	3	459.551	-0.59	43.4462	8688	8688	Q13247	ArgAcetylD3	RDRDGYSYGSR	11	3	43.446	733	11		N-Term(ArgAcetylD3)	Acetyl:2H(3)@Any N-term	0	27	QE	-0.0414	DRDGYSYGSR	0.954892	0.964391	0.8296	0.570263	7	0.970819	0.94621	1	RR	TRUE	trypsin	2	13	4	0.235294	0.133333
Low	[R].dRDGYSYGSR.[S]	HCD	1.04	0.19	0.93	-0.405	0.32	1	Sequest HT (2)	2	688.822	-1.29	43.5042	8710	8710	Q13247	ArgAcetylD3	RDRDGYSYGSR	11	2	43.504	734	11		N-Term(ArgAcetylD3)	Acetyl:2H(3)@Any N-term	0	27	QE	-0.0408727	DRDGYSYGSR	0.91339	0.921079	0.745381	0.225141	2	0.72008	0.967163	1	RR	TRUE	trypsin	0	5	8	0.615385	0
High	[R].vNVGEGSHPER.[V]	HCD	4	1.3e-05	2.8e-05	1.29	0.64	1	Sequest HT (2)	3	461.238	-0.71	43.9579	8886	8886	Q14315	ArgAcetylD3	RVNVGEGSHPER	12	3	43.958	735	12		N-Term(ArgAcetylD3)	Acetyl:2H(3)@Any N-term	0	27	QE	-0.0367455	VNVGEGSHPER	0.975982	0.979565	0.871077	0.457928	9	0.963104	0.979685	0	FR	TRUE	trypsin	3	15	6	0.285714	0.166667
Medium	[R].kEkSkR.[D]	HCD	1.44	0.016	0.25	-0.068	0.1	1	Sequest HT (2)	2	556.352	-1.15	43.9866	8897	8897	Q6GQQ9	ArgAcetylD3	RKEKSKR	7	2	43.987	736	7		N-Term(ArgAcetylD3);K1(Acetyl:2H(3));K3(Acetyl:2H(3));K5(Acetyl:2H(3))	Acetyl:2H(3)@Any N-term;Acetyl:2H(3)@K;Acetyl:2H(3)@K;Acetyl:2H(3)@K	0;2;4;6	27	QE	-0.0364818	KEKSKR	0.952171	0.950292	0.798431	0.478261	3	0.552777	0.967102	0.25	WP;RL;RR;WP	TRUE	trypsin	0	7	4	0.363636	0
High	[R].eQQPSVTSR.[S]	HCD	2.17	0.00046	0.0033	0.427	0.44	1	Sequest HT (2)	2	616.826	1.72	44.0541	8924	8924	P25686	ArgAcetylD3	REQQPSVTSR	10	2	44.054	737	10		N-Term(ArgAcetylD3)	Acetyl:2H(3)@Any N-term	0	27	QE	-0.0358727	EQQPSVTSR	0.943295	0.95024	0.798324	0.307979	3	0.577547	0.972325	1	RR	TRUE	trypsin	2	6	4	0.4	0.25
Medium	[R].kENGVNSPR.[M]	HCD	1.12	0.026	0.39	-0.129	0.39	1	Sequest HT (2)	2	623.842	0.02	44.1267	8954	8954	Q13625	ArgAcetylD3	RKENGVNSPR	10	2	44.127	738	10		N-Term(ArgAcetylD3);K1(Acetyl:2H(3))	Acetyl:2H(3)@Any N-term;Acetyl:2H(3)@K	0;2	27	QE	-0.0352091	KENGVNSPR	0.843353	0.853023	0.650467	0.191634	2	-0.170262	0.933945	1	RR	TRUE	trypsin	2	5	5	0.5	0.285714
Medium	[R].qDEHGYISR.[C]	HCD	1.2	0.01	0.15	0	0.22	1	Sequest HT (2)	2	653.322	0.03	44.2272	8994	8994	P04792	ArgAcetylD3	RQDEHGYISR	10	2	44.227	739	10		N-Term(ArgAcetylD3)	Acetyl:2H(3)@Any N-term	0	27	QE	-0.0343	QDEHGYISR	0.916062	0.925004	0.751877	0.465251	4	0.857236	0.954885	0	ER	TRUE	trypsin	0	8	6	0.428571	0
High	[R].dPNNYRPR.[I]	HCD	1.77	0.0033	0.045	0.136	0.25	1	Sequest HT (2)	3	411.549	-0.36	44.2933	9019	9019	P61221	ArgAcetylD3	RDPNNYRPR	9	3	44.293	740	9		N-Term(ArgAcetylD3)	Acetyl:2H(3)@Any N-term	0	27	QE	-0.0337	DPNNYRPR	0.95166	0.957909	0.814635	0.00109971	4	0.953757	0.956305	1	RR	TRUE	trypsin	3	6	7	0.538462	0.333333
High	[R].aVGDASkR.[L]	HCD	1.86	0.0031	0.042	0.145	0.3	1	Sequest HT (2)	2	525.301	-1.88	44.3294	9033	9033	Q9Y490	ArgAcetylD3	RAVGDASKR	9	2	44.329	741	9		N-Term(ArgAcetylD3);K7(Acetyl:2H(3))	Acetyl:2H(3)@Any N-term;Acetyl:2H(3)@K	0;8	27	QE	-0.0333727	AVGDASKR	0.904427	0.915098	0.735774	0.431452	4	0.869294	0.936536	0	LR	TRUE	trypsin	2	7	3	0.3	0.222222
High	[R].aVSPSNPkAR.[Q]	HCD	2.22	0.00079	0.0072	0.334	0.43	1	Sequest HT (2)	3	424.914	-0.52	44.4057	9064	9064	Q14244	ArgAcetylD3	RAVSPSNPKAR	11	3	44.406	742	11		N-Term(ArgAcetylD3);K8(Acetyl:2H(3))	Acetyl:2H(3)@Any N-term;Acetyl:2H(3)@K	0;9	27	QE	-0.0326727	AVSPSNPKAR	0.736827	0.77804	0.567572	0.545028	4	0.336164	0.96479	1	RR	TRUE	trypsin	1	9	4	0.307692	0.1
High	[R].vEEEkR.[KG]	HCD	1.68	0.0029	0.038	0.155	0.05	1	Sequest HT (2)	2	518.289	0.12	44.5731	9134	9134	P49589; Q08170	ArgAcetylD3	RVEEEKR	7	2	44.573	743	7		N-Term(ArgAcetylD3);K5(Acetyl:2H(3))	Acetyl:2H(3)@Any N-term;Acetyl:2H(3)@K	0;6	27	QE	-0.0311545	VEEEKR	0.943569	0.953928	0.806003	0.655217	4	0.804888	0.966656	0.4	RR;AA;QW;QN;RR	TRUE	trypsin	0	9	2	0.181818	0
High	[R].eNkGATAAPQR.[K]	HCD	1.33	0.0082	0.12	0.027	0.14	1	Sequest HT (2)	2	694.878	-1.57	44.8316	9242	9242	Q9Y2W2	ArgAcetylD3	RENKGATAAPQR	12	2	44.832	744	12		N-Term(ArgAcetylD3);K3(Acetyl:2H(3))	Acetyl:2H(3)@Any N-term;Acetyl:2H(3)@K	0;4	27	QE	-0.0288	ENKGATAAPQR	0.926341	0.930894	0.76194	0.597815	2	0.93745	0.957878	1	RR	TRUE	trypsin	1	5	3	0.375	0.166667
High	[R].dYDDmSPR.[G]	HCD	2.53	0.0044	0.06	0.106	0.53	1	Sequest HT (2)	3	405.842	-1.07	44.9239	9281	9281	P61978	ArgAcetylD3	RDYDDMSPR	9	3	44.924	745	9		N-Term(ArgAcetylD3);M5(Oxidation)	Acetyl:2H(3)@Any N-term;Oxidation@M	0;6	27	QE	-0.0279636	DYDDMSPR	0.910893	0.93048	0.76122	0.58926	5	0.880597	0.932199	1	RR	TRUE	trypsin	3	9	1	0.1	0.25
Low	[R].dYDDmSPR.[G]	HCD	1	0.092	0.78	-0.29	0.34	1	Sequest HT (2)	2	608.26	-0.16	45.0989	9355	9355	P61978	ArgAcetylD3	RDYDDMSPR	9	2	45.099	746	9		N-Term(ArgAcetylD3);M5(Oxidation)	Acetyl:2H(3)@Any N-term;Oxidation@M	0;6	27	QE	-0.0263727	DYDDMSPR	0.931713	0.937982	0.774615	0.315433	2	0.934773	0.968569	1	RR	TRUE	trypsin	0	5	7	0.583333	0
Medium	[R].lGPGGAAR.[L]	HCD	1.64	0.022	0.33	-0.104	0.34	1	Sequest HT (2)	2	450.267	0.95	45.5557	9539	9539	Q8IVL6	ArgAcetylD3	RLGPGGAAR	9	2	45.556	747	9		N-Term(ArgAcetylD3)	Acetyl:2H(3)@Any N-term	0	27	QE	-0.0222182	LGPGGAAR	0.884966	0.892363	0.701908	0.510814	4	0.473279	0.938616	1	RR	TRUE	trypsin	1	8	3	0.272727	0.111111
High	[R].aDkkPAR.[G]	HCD	1.85	0.002	0.022	0.21	0.31	1	Sequest HT (2)	2	538.83	-0.18	45.7324	9611	9611	Q92522	ArgAcetylD3	RADKKPAR	8	2	45.732	748	8		N-Term(ArgAcetylD3);K3(Acetyl:2H(3));K4(Acetyl:2H(3))	Acetyl:2H(3)@Any N-term;Acetyl:2H(3)@K;Acetyl:2H(3)@K	0;4;5	27	QE	-0.0206182	ADKKPAR	0.933879	0.943328	0.784646	0.553092	4	0.936211	0.936736	1	RR	TRUE	trypsin	1	8	3	0.272727	0.111111
High	[R].sGSGLVGR.[Q]	HCD	1.68	0.00098	0.0093	0.305	0.24	1	Sequest HT (2)	2	467.269	1.06	46.0118	9727	9727	P10909	ArgAcetylD3	RSGSGLVGR	9	2	46.012	749	9		N-Term(ArgAcetylD3)	Acetyl:2H(3)@Any N-term	0	27	QE	-0.0180727	SGSGLVGR	0.86937	0.88443	0.690905	0.546921	5	0.610026	0.912857	0	CR	TRUE	trypsin	1	10	2	0.166667	0.0909091
High	[R].qDEHGYISR.[C]	HCD	2.56	0.0011	0.01	0.292	0.45	1	Sequest HT (2)	3	435.884	-0.69	46.1653	9798	9798	P04792	ArgAcetylD3	RQDEHGYISR	10	3	46.165	750	10		N-Term(ArgAcetylD3)	Acetyl:2H(3)@Any N-term	0	27	QE	-0.0166818	QDEHGYISR	0.965535	0.972408	0.850105	0.673874	5	0.979026	0.963124	0	ER	TRUE	trypsin	0	11	4	0.266667	0
High	[R].sASASHQADIkEAR.[E]	HCD	4.35	1.3e-05	3.9e-05	1.23	0.58	1	Sequest HT (2)	3	572.968	0.26	47.566	10383	10383	Q14739	ArgAcetylD3	RSASASHQADIKEAR	15	3	47.566	751	15		N-Term(ArgAcetylD3);K11(Acetyl:2H(3))	Acetyl:2H(3)@Any N-term;Acetyl:2H(3)@K	0;12	27	QE	-0.00394545	SASASHQADIKEAR	0.989417	0.991584	0.917347	0.71473	11	0.994788	0.986238	1	RR	TRUE	trypsin	4	17	2	0.105263	0.190476
High	[R].nPQNSSQSADGLR.[C]	HCD	2	0.00036	0.0024	0.469	0.39	1	Sequest HT (2)	2	787.891	1.96	47.7203	10449	10449	Q01081	ArgAcetylD3	RNPQNSSQSADGLR	14	2	47.72	752	14		N-Term(ArgAcetylD3)	Acetyl:2H(3)@Any N-term	0	27	QE	-0.00254545	NPQNSSQSADGLR	0.981472	0.982494	0.880705	0.592803	2	0.96137	0.99375	0	YR	TRUE	trypsin	0	6	5	0.454545	0
Low	[R].tDLkkNR.[D]	HCD	1.01	0.74	1	-1.08	0.19	1	Sequest HT (2)	2	583.358	7.21	47.9804	10571	10571	P12268; P20839	ArgAcetylD3	RTDLKKNR	8	2	47.98	753	8		N-Term(ArgAcetylD3);K4(Acetyl:2H(3));K5(Acetyl:2H(3))	Acetyl:2H(3)@Any N-term;Acetyl:2H(3)@K;Acetyl:2H(3)@K	0;5;6	27	QE	-0.000181818	TDLKKNR	0.250214	0.359472	0.234087	-0.0355775	3	0.180428	0.829903	0	AR;AR	TRUE	trypsin	0	6	7	0.538462	0
Medium	[R].qGGLAGSVR.[I]	HCD	1.42	0.012	0.17	-0.021	0.37	1	Sequest HT (2)	2	523.3	-0.69	48.7253	10898	10898	Q969G5	ArgAcetylD3	RQGGLAGSVR	10	2	48.725	754	10		N-Term(ArgAcetylD3)	Acetyl:2H(3)@Any N-term	0	27	QE	0.00659091	QGGLAGSVR	0.928599	0.931828	0.763574	0.604762	2	0.38528	0.972154	1	RR	TRUE	trypsin	0	7	3	0.3	0
High	[R].kkIQQR.[Q]	HCD	1.71	0.0012	0.012	0.28	0	1	Sequest HT (2)	2	546.353	-0.65	49.8681	11419	11419	Q92547	ArgAcetylD3	RKKIQQR	7	2	49.868	755	7		N-Term(ArgAcetylD3);K1(Acetyl:2H(3));K2(Acetyl:2H(3))	Acetyl:2H(3)@Any N-term;Acetyl:2H(3)@K;Acetyl:2H(3)@K	0;2;3	27	QE	0.0169818	KKIQQR	0.951697	0.963054	0.82641	0.557826	5	0.722247	0.972792	0	WR	TRUE	trypsin	1	9	3	0.25	0.1
Low	[R].eDYVGGQSHR.[S]	HCD	0.8	0.46	1	-0.632	0.3	1	Sequest HT (2)	2	674.822	-4.46	49.9647	11463	11463	Q7Z6E9	ArgAcetylD3	REDYVGGQSHR	11	2	49.965	756	11		N-Term(ArgAcetylD3)	Acetyl:2H(3)@Any N-term	0	27	QE	0.0178636	EDYVGGQSHR	0.68531	0.703514	0.496773	-0.245497	2	-0.114941	0.873082	1	RR	TRUE	trypsin	2	1	9	0.9	0.666667
High	[R].akVYGR.[G]	HCD	1.94	0.0023	0.028	0.187	0.21	1	Sequest HT (2)	2	470.285	-0.88	50.1082	11527	11527	O75369	ArgAcetylD3	RAKVYGR	7	2	50.108	757	7		N-Term(ArgAcetylD3);K2(Acetyl:2H(3))	Acetyl:2H(3)@Any N-term;Acetyl:2H(3)@K	0;3	27	QE	0.0191636	AKVYGR	0.903371	0.92801	0.756963	0.52913	5	0.600022	0.932653	1	RR	TRUE	trypsin	1	9	2	0.181818	0.1
High	[R].gADDDRPSWR.[N]	HCD	3.02	0.00011	0.00041	0.763	0.42	1	Sequest HT (2)	3	459.223	-0.26	50.321	11621	11621	Q14152	ArgAcetylD3	RGADDDRPSWR	11	3	50.321	758	11		N-Term(ArgAcetylD3)	Acetyl:2H(3)@Any N-term	0	27	QE	0.0211	GADDDRPSWR	0.962284	0.968775	0.840491	0.676735	8	0.973675	0.958578	1	RR	TRUE	trypsin	2	15	2	0.117647	0.117647
High	[R].gADDDRPSWR.[N]	HCD	2.77	0.00022	0.0011	0.59	0.48	1	Sequest HT (2)	3	459.223	0.41	50.8424	11855	11855	Q14152	ArgAcetylD3	RGADDDRPSWR	11	3	50.842	759	11		N-Term(ArgAcetylD3)	Acetyl:2H(3)@Any N-term	0	27	QE	0.0258364	GADDDRPSWR	0.973889	0.978228	0.866913	0.632552	8	0.966907	0.974553	1	RR	TRUE	trypsin	2	14	3	0.176471	0.125
High	[R].nEQLTLHDER.[F]	HCD	4.27	2.3e-05	5.8e-05	1.15	0.62	1	Sequest HT (2)	3	485.917	-0.35	51.1191	11978	11978	Q96GA3	ArgAcetylD3	RNEQLTLHDER	11	3	51.119	760	11		N-Term(ArgAcetylD3)	Acetyl:2H(3)@Any N-term	0	27	QE	0.0283545	NEQLTLHDER	0.869024	0.88882	0.696949	0.195872	8	0.984139	0.844719	1	RR	TRUE	trypsin	1	10	10	0.5	0.0909091
High	[R].vEIQDR.[G]	HCD	2.54	0.0022	0.027	0.192	0.09	1	Sequest HT (2)	2	480.769	0	51.14	11986	11986	Q6WRI0	ArgAcetylD3	RVEIQDR	7	2	51.14	761	7		N-Term(ArgAcetylD3)	Acetyl:2H(3)@Any N-term	0	27	QE	0.0285455	VEIQDR	0.967585	0.971293	0.847091	0.45	4	0.770888	0.983157	0	QR	TRUE	trypsin	1	8	3	0.272727	0.111111
High	[R].gPAEESSSWRDSSR.[D]	HCD	2.51	0.00012	0.00045	0.746	0.46	1	Sequest HT (2)	3	584.609	-0.65	51.3109	12060	12060	Q14152	ArgAcetylD3	RGPAEESSSWRDSSR	15	3	51.311	762	15		N-Term(ArgAcetylD3)	Acetyl:2H(3)@Any N-term	0	27	QE	0.0301	GPAEESSSWRDSSR	0.826033	0.856761	0.655053	0.590602	9	0.721099	0.859918	1	RR	TRUE	trypsin	3	14	2	0.125	0.176471
High	[R].mPPPPR.[H]	HCD	1.3	0.0037	0.051	0.123	0.18	1	Sequest HT (2)	2	448.254	-1.16	51.3308	12069	12069	Q8IYB3	ArgAcetylD3	RMPPPPR	7	2	51.331	763	7		N-Term(ArgAcetylD3)	Acetyl:2H(3)@Any N-term	0	27	QE	0.0302818	MPPPPR	0.778987	0.835031	0.629101	0.22	4	0.21546	0.963826	0.333333	HL;RR;TM	TRUE	trypsin	3	9	3	0.25	0.25
High	[R].qkALGkNR.[S]	HCD	1.29	0.00026	0.0014	0.549	0.22	1	Sequest HT (2)	2	603.375	-0.14	51.4592	12124	12124	Q96GQ7	ArgAcetylD3	RQKALGKNR	9	2	51.459	764	9		N-Term(ArgAcetylD3);K2(Acetyl:2H(3));K6(Acetyl:2H(3))	Acetyl:2H(3)@Any N-term;Acetyl:2H(3)@K;Acetyl:2H(3)@K	0;3;7	27	QE	0.0314455	QKALGKNR	0.916582	0.930756	0.7617	0.32313	4	0.224122	0.979525	1	RR	TRUE	trypsin	2	7	4	0.363636	0.222222
High	[R].lDASEGGGGTNPGGR.[S]	HCD	3.22	1.3e-05	4.1e-05	1.22	0.67	1	Sequest HT (2)	2	773.375	-0.7	51.8045	12272	12272	O60245	ArgAcetylD3	RLDASEGGGGTNPGGR	16	2	51.804	765	16		N-Term(ArgAcetylD3)	Acetyl:2H(3)@Any N-term	0	27	QE	0.0345818	LDASEGGGGTNPGGR	0.791852	0.819203	0.611167	0.616366	3	0.96983	0.675016	1	RR	TRUE	trypsin	2	8	3	0.272727	0.2
High	[R].lRQPkYPR.[K]	HCD	3	0.00077	0.007	0.337	0.5	1	Sequest HT (2)	3	435.267	-0.86	51.9665	12346	12346	P62750	ArgAcetylD3	RLRQPKYPR	9	3	51.967	766	9		N-Term(ArgAcetylD3);K5(Acetyl:2H(3))	Acetyl:2H(3)@Any N-term;Acetyl:2H(3)@K	0;6	27	QE	0.0360636	LRQPKYPR	0.762228	0.827053	0.619969	0.348607	6	0.383339	0.87629	NA	NA	FALSE	trypsin	1	11	4	0.266667	0.0833333
High	[R].tSGRDkYGPPVR.[T]	HCD	3.85	6.5e-05	0.00022	0.883	0.58	1	Sequest HT (2)	3	526.959	0.21	52.0056	12363	12363	Q13247	ArgAcetylD3	RTSGRDKYGPPVR	13	3	52.006	767	13		N-Term(ArgAcetylD3);K6(Acetyl:2H(3))	Acetyl:2H(3)@Any N-term;Acetyl:2H(3)@K	0;7	27	QE	0.0364182	TSGRDKYGPPVR	0.76958	0.810921	0.602067	0.270842	9	0.627797	0.912478	1	RR	TRUE	trypsin	4	12	4	0.25	0.25
High	[R].mEELHNQEmQkR.[K]	HCD	3.19	0.00013	0.00055	0.707	0.61	1	Sequest HT (2)	3	612.298	-0.3	52.2322	12459	12459	P23246	ArgAcetylD3	RMEELHNQEMQKR	13	3	52.232	768	13		N-Term(ArgAcetylD3);M9(Oxidation);K11(Acetyl:2H(3))	Acetyl:2H(3)@Any N-term;Oxidation@M;Acetyl:2H(3)@K	0;10;12	27	QE	0.0384727	MEELHNQEMQKR	0.988113	0.990357	0.91152	0.892694	8	0.992536	0.983409	1	RR	TRUE	trypsin	0	16	2	0.111111	0
High	[R].kTLSEETR.[Q]	HCD	2.55	0.00012	0.00044	0.751	0.6	1	Sequest HT (2)	2	605.339	0.76	52.5472	12591	12591	Q9NVI7; Q5T9A4	ArgAcetylD3	RKTLSEETR	9	2	52.547	769	9		N-Term(ArgAcetylD3);K1(Acetyl:2H(3))	Acetyl:2H(3)@Any N-term;Acetyl:2H(3)@K	0;2	27	QE	0.0413364	KTLSEETR	0.969053	0.973175	0.852211	0.590359	2	0.930198	0.973793	1	RR;RR	TRUE	trypsin	1	8	3	0.272727	0.111111
High	[R].tkTEISEmNR.[N]	HCD	2.54	0.00025	0.0013	0.562	0.33	1	Sequest HT (2)	3	490.921	0.55	52.6612	12642	12642	P05787	ArgAcetylD3	RTKTEISEMNR	11	3	52.661	770	11		N-Term(ArgAcetylD3);K2(Acetyl:2H(3));M8(Oxidation)	Acetyl:2H(3)@Any N-term;Acetyl:2H(3)@K;Oxidation@M	0;3;9	27	QE	0.0423727	TKTEISEMNR	0.963267	0.96839	0.839507	0.69728	7	0.987825	0.951037	1	RR	TRUE	trypsin	1	12	3	0.2	0.0769231
Medium	[R].aQPkMVTR.[T]	HCD	1.53	0.036	0.5	-0.168	0.24	1	Sequest HT (2)	2	588.843	-0.34	52.706	12660	12660	O43347; Q96DH6	ArgAcetylD3	RAQPKMVTR	9	2	52.706	771	9		N-Term(ArgAcetylD3);K4(Acetyl:2H(3))	Acetyl:2H(3)@Any N-term;Acetyl:2H(3)@K	0;5	27	QE	0.0427818	AQPKMVTR	0.943453	0.942807	0.783649	0.0914589	4	0.277695	0.977825	1	RR;RR	TRUE	trypsin	1	6	8	0.571429	0.142857
High	[R].gkSGFNSkSGQR.[G]	HCD	4.05	1.3e-05	1.4e-06	1.86	0.67	1	Sequest HT (2)	2	772.418	0.66	52.7487	12681	12681	P07910	ArgAcetylD3	RGKSGFNSKSGQR	13	2	52.749	772	13		N-Term(ArgAcetylD3);K2(Acetyl:2H(3));K8(Acetyl:2H(3))	Acetyl:2H(3)@Any N-term;Acetyl:2H(3)@K;Acetyl:2H(3)@K	0;3;9	27	QE	0.0431727	GKSGFNSKSGQR	0.754897	0.782897	0.572518	0.592108	2	-0.0421089	0.858828	1	RR	TRUE	trypsin	1	6	3	0.333333	0.142857
Medium	[R].tkTEISEmNR.[N]	HCD	1.49	0.016	0.25	-0.068	0.41	1	Sequest HT (2)	2	735.879	1.74	52.7938	12699	12699	P05787	ArgAcetylD3	RTKTEISEMNR	11	2	52.794	773	11		N-Term(ArgAcetylD3);K2(Acetyl:2H(3));M8(Oxidation)	Acetyl:2H(3)@Any N-term;Acetyl:2H(3)@K;Oxidation@M	0;3;9	27	QE	0.0435818	TKTEISEMNR	0.938654	0.943058	0.78413	0.359287	4	0.797186	0.989943	1	RR	TRUE	trypsin	1	4	5	0.555556	0.2
High	[R].mNPSVSPANQR.[H]	HCD	2.12	0.00088	0.008	0.322	0.48	1	Sequest HT (2)	2	701.36	1.99	52.938	12765	12765	P18850	ArgAcetylD3	RMNPSVSPANQR	12	2	52.938	774	12		N-Term(ArgAcetylD3)	Acetyl:2H(3)@Any N-term	0	27	QE	0.0448909	MNPSVSPANQR	0.944096	0.949987	0.797809	0.461875	3	0.71295	0.976042	1	RR	TRUE	trypsin	1	7	5	0.416667	0.125
High	[R].gGNFkSkSR.[Y]	HCD	2.96	0.00034	0.0021	0.487	0.53	1	Sequest HT (2)	2	636.362	0.22	52.9393	12766	12766	Q96GQ7	ArgAcetylD3	RGGNFKSKSR	10	2	52.939	775	10		N-Term(ArgAcetylD3);K5(Acetyl:2H(3));K7(Acetyl:2H(3))	Acetyl:2H(3)@Any N-term;Acetyl:2H(3)@K;Acetyl:2H(3)@K	0;6;8	27	QE	0.0449	GGNFKSKSR	0.77433	0.810919	0.602065	0.613513	3	0.284591	0.829792	1	RR	TRUE	trypsin	1	7	2	0.222222	0.125
High	[R].gGNFkSkSR.[Y]	HCD	2.52	0.0016	0.017	0.239	0.43	1	Sequest HT (2)	3	424.577	0.07	53.0428	12813	12813	Q96GQ7	ArgAcetylD3	RGGNFKSKSR	10	3	53.043	776	10		N-Term(ArgAcetylD3);K5(Acetyl:2H(3));K7(Acetyl:2H(3))	Acetyl:2H(3)@Any N-term;Acetyl:2H(3)@K;Acetyl:2H(3)@K	0;6;8	27	QE	0.0458455	GGNFKSKSR	0.98465	0.986341	0.894658	0.433462	5	0.843046	0.997605	1	RR	TRUE	trypsin	3	7	3	0.3	0.3
High	[R].eAkELQQR.[M]	HCD	2.46	0.0007	0.0061	0.353	0.37	1	Sequest HT (2)	2	624.353	1.6	53.0644	12822	12822	Q15149	ArgAcetylD3	REAKELQQR	9	2	53.064	777	9		N-Term(ArgAcetylD3);K3(Acetyl:2H(3))	Acetyl:2H(3)@Any N-term;Acetyl:2H(3)@K	0;4	27	QE	0.0460364	EAKELQQR	0.93211	0.940727	0.779712	0.620235	6	0.749178	0.966678	0	ER	TRUE	trypsin	1	12	2	0.142857	0.0769231
High	[R].gkSGFNSkSGQR.[G]	HCD	4.46	1.3e-05	2.7e-05	1.3	0.63	1	Sequest HT (2)	3	515.281	-0.26	53.2125	12881	12881	P07910	ArgAcetylD3	RGKSGFNSKSGQR	13	3	53.212	778	13		N-Term(ArgAcetylD3);K2(Acetyl:2H(3));K8(Acetyl:2H(3))	Acetyl:2H(3)@Any N-term;Acetyl:2H(3)@K;Acetyl:2H(3)@K	0;3;9	27	QE	0.0473818	GKSGFNSKSGQR	0.978704	0.982122	0.879441	0.642152	10	0.968122	0.982967	1	RR	TRUE	trypsin	4	14	2	0.125	0.222222
High	[R].gkSGFNSkSGQR.[G]	HCD	3.02	1.3e-05	1.1e-05	1.47	0.58	1	Sequest HT (2)	2	772.418	-0.37	53.2755	12907	12907	P07910	ArgAcetylD3	RGKSGFNSKSGQR	13	2	53.276	779	13		N-Term(ArgAcetylD3);K2(Acetyl:2H(3));K8(Acetyl:2H(3))	Acetyl:2H(3)@Any N-term;Acetyl:2H(3)@K;Acetyl:2H(3)@K	0;3;9	27	QE	0.0479636	GKSGFNSKSGQR	0.788021	0.812643	0.603944	0.696103	3	0.176877	0.867096	1	RR	TRUE	trypsin	1	7	2	0.222222	0.125
Medium	[R].nGIkkPR.[S]	HCD	1.4	0.018	0.28	-0.081	0.47	1	Sequest HT (2)	2	552.353	0.05	53.4083	12962	12962	P47914	ArgAcetylD3	RNGIKKPR	8	2	53.408	780	8		N-Term(ArgAcetylD3);K4(Acetyl:2H(3));K5(Acetyl:2H(3))	Acetyl:2H(3)@Any N-term;Acetyl:2H(3)@K;Acetyl:2H(3)@K	0;5;6	27	QE	0.0491636	NGIKKPR	0.880036	0.89459	0.705065	0.689929	2	0.640741	0.931656	0	HR	TRUE	trypsin	0	7	2	0.222222	0
Low	[R].eTNEPVkTkTR.[T]	HCD	0.71	0.37	1	-0.553	0	1	Sequest HT (2)	2	797.449	0.01	53.6607	13073	13073	P12956	ArgAcetylD3	RETNEPVKTKTR	12	2	53.661	781	12		N-Term(ArgAcetylD3);K7(Acetyl:2H(3));K9(Acetyl:2H(3))	Acetyl:2H(3)@Any N-term;Acetyl:2H(3)@K;Acetyl:2H(3)@K	0;8;10	27	QE	0.0514636	ETNEPVKTKTR	0.903577	0.909233	0.726662	0.209796	1	0.859277	0.919445	0	YR	TRUE	trypsin	1	3	7	0.7	0.25
High	[R].eDFcPR.[K]	HCD	1.97	0.0064	0.087	0.063	0.39	1	Sequest HT (2)	2	512.739	0.34	53.7962	13132	13132	Q9H0W8	ArgAcetylD3	REDFCPR	7	2	53.796	782	7		N-Term(ArgAcetylD3);C4(Carbamidomethyl)	Acetyl:2H(3)@Any N-term;Carbamidomethyl@C	0;5	27	QE	0.0526909	EDFCPR	0.913474	0.936306	0.771557	0.629565	3	0.911838	0.924901	1	RR	TRUE	trypsin	1	8	2	0.2	0.111111
High	[R].qDVDNASLAR.[L]	HCD	1.91	0.0032	0.043	0.143	0.33	1	Sequest HT (2)	2	645.335	0.08	54.0852	13256	13256	P08670	ArgAcetylD3	RQDVDNASLAR	11	2	54.085	783	11		N-Term(ArgAcetylD3)	Acetyl:2H(3)@Any N-term	0	27	QE	0.0553182	QDVDNASLAR	0.922857	0.924924	0.751743	0.583959	4	0.844743	0.956045	0	FR	TRUE	trypsin	0	10	5	0.333333	0
High	[R].dLEAVNSR.[L]	HCD	1.72	0.0002	0.00091	0.619	0.29	1	Sequest HT (2)	2	552.795	-1.05	54.0969	13262	13262	Q9P0B6	ArgAcetylD3	RDLEAVNSR	9	2	54.097	784	9		N-Term(ArgAcetylD3)	Acetyl:2H(3)@Any N-term	0	27	QE	0.0554273	DLEAVNSR	0.931497	0.939119	0.776712	0.570015	6	0.550317	0.969451	1	RR	TRUE	trypsin	1	12	2	0.142857	0.0769231
High	[R].gRGPkGDkASDPEAGVAR.[G]	HCD	5	1.3e-05	1.7e-05	1.38	0.55	1	Sequest HT (2)	3	687.038	0.88	54.3307	13360	13360	Q9NY93	ArgAcetylD3	RGRGPKGDKASDPEAGVAR	19	3	54.331	785	19		N-Term(ArgAcetylD3);K5(Acetyl:2H(3));K8(Acetyl:2H(3))	Acetyl:2H(3)@Any N-term;Acetyl:2H(3)@K;Acetyl:2H(3)@K	0;6;9	27	QE	0.0575545	GRGPKGDKASDPEAGVAR	0.992613	0.992572	0.922355	0.567641	9	0.991741	0.994669	1	RR	TRUE	trypsin	7	13	1	0.0714286	0.35
High	[R].qTSTkGQVLR.[K]	HCD	2.63	0.00015	0.00064	0.68	0.34	1	Sequest HT (2)	2	682.399	-1.83	54.5516	13460	13460	Q9BYG3	ArgAcetylD3	RQTSTKGQVLR	11	2	54.552	786	11		N-Term(ArgAcetylD3);K5(Acetyl:2H(3))	Acetyl:2H(3)@Any N-term;Acetyl:2H(3)@K	0;6	27	QE	0.0595636	QTSTKGQVLR	0.920822	0.929149	0.758918	0.654034	3	0.469271	0.967293	0	NR	TRUE	trypsin	0	10	3	0.230769	0
High	[R].lSYNTASNkTR.[L]	HCD	3.73	0.00034	0.0022	0.485	0.42	1	Sequest HT (2)	3	500.94	1.12	54.5709	13467	13467	P49207	ArgAcetylD3	RLSYNTASNKTR	12	3	54.571	787	12		N-Term(ArgAcetylD3);K9(Acetyl:2H(3))	Acetyl:2H(3)@Any N-term;Acetyl:2H(3)@K	0;10	27	QE	0.0597364	LSYNTASNKTR	0.953487	0.960164	0.819703	0.530444	6	0.839023	0.982839	1	RR	TRUE	trypsin	2	10	4	0.285714	0.166667
High	[R].kkkYQkR.[M]	HCD	1.2	0.0018	0.02	0.222	0.34	1	Sequest HT (2)	2	680.438	-0.1	54.953	13631	13631	O00566	ArgAcetylD3	RKKKYQKR	8	2	54.953	788	8		N-Term(ArgAcetylD3);K1(Acetyl:2H(3));K2(Acetyl:2H(3));K3(Acetyl:2H(3));K6(Acetyl:2H(3))	Acetyl:2H(3)@Any N-term;Acetyl:2H(3)@K;Acetyl:2H(3)@K;Acetyl:2H(3)@K;Acetyl:2H(3)@K	0;2;3;4;7	27	QE	0.0632091	KKKYQKR	0.931621	0.919014	0.742026	0.322113	1	0.420506	0.952002	1	RR	TRUE	trypsin	0	7	6	0.461538	0
High	[R].qQEEILR.[Q]	HCD	2.23	0.00074	0.0064	0.347	0.15	1	Sequest HT (2)	2	558.813	-1.59	54.9581	13633	13633	Q6Y7W6	ArgAcetylD3	RQQEEILR	8	2	54.958	789	8		N-Term(ArgAcetylD3)	Acetyl:2H(3)@Any N-term	0	27	QE	0.0632545	QQEEILR	0.972614	0.974726	0.856566	0.683361	4	0.830332	0.991135	0.5	LE;RR	TRUE	trypsin	0	10	2	0.166667	0
High	[R].kELSEPSSTR.[I]	HCD	2.28	0.00092	0.0085	0.315	0.41	1	Sequest HT (2)	2	690.375	2.06	55.0393	13668	13668	P31327	ArgAcetylD3	RKELSEPSSTR	11	2	55.039	790	11		N-Term(ArgAcetylD3);K1(Acetyl:2H(3))	Acetyl:2H(3)@Any N-term;Acetyl:2H(3)@K	0;2	27	QE	0.0639909	KELSEPSSTR	0.961831	0.965666	0.832695	0.680582	2	0.940935	0.975644	0	LR	TRUE	trypsin	1	7	2	0.222222	0.125
High	[R].aPDQAAEIGSR.[G]	HCD	3.39	1.3e-05	2e-06	1.79	0.58	1	Sequest HT (2)	2	658.343	-0.86	55.393	13819	13819	Q3ZCQ8	ArgAcetylD3	RAPDQAAEIGSR	12	2	55.393	791	12		N-Term(ArgAcetylD3)	Acetyl:2H(3)@Any N-term	0	27	QE	0.0672091	APDQAAEIGSR	0.890785	0.911712	0.730478	0.535307	5	0.910112	0.869554	1	RR	TRUE	trypsin	3	12	3	0.2	0.2
High	[R].dYDDMSPR.[G]	HCD	2.37	0.0019	0.022	0.212	0.55	1	Sequest HT (2)	2	600.263	-0.28	55.4037	13824	13824	P61978	ArgAcetylD3	RDYDDMSPR	9	2	55.404	792	9		N-Term(ArgAcetylD3)	Acetyl:2H(3)@Any N-term	0	27	QE	0.0673091	DYDDMSPR	0.61394	0.684936	0.48034	0.431085	4	0.912767	0.564863	1	RR	TRUE	trypsin	1	9	5	0.357143	0.1
High	[R].yGAVIkR.[L]	HCD	2.2	0.0022	0.026	0.193	0.57	1	Sequest HT (2)	2	526.828	0.91	55.4811	13857	13857	Q9NY28	ArgAcetylD3	RYGAVIKR	8	2	55.481	793	8		N-Term(ArgAcetylD3);K6(Acetyl:2H(3))	Acetyl:2H(3)@Any N-term;Acetyl:2H(3)@K	0;7	27	QE	0.0680091	YGAVIKR	0.260086	0.416209	0.273283	-0.112753	3	-0.15113	0.319668	1	KR	TRUE	trypsin	2	6	5	0.454545	0.25
High	[R].dYDDMSPR.[G]	HCD	3.1	0.00038	0.0026	0.457	0.5	1	Sequest HT (2)	3	400.511	-1.34	55.5578	13890	13890	P61978	ArgAcetylD3	RDYDDMSPR	9	3	55.558	794	9		N-Term(ArgAcetylD3)	Acetyl:2H(3)@Any N-term	0	27	QE	0.0687091	DYDDMSPR	0.920577	0.938636	0.775819	0.586877	4	0.871914	0.943758	1	RR	TRUE	trypsin	2	11	2	0.153846	0.153846
High	[R].dYDDmSPR.[G]	HCD	2.73	0.0027	0.034	0.166	0.56	1	Sequest HT (2)	3	405.843	0.18	55.6083	13911	13911	P61978	ArgAcetylD3	RDYDDMSPR	9	3	55.608	795	9		N-Term(ArgAcetylD3);M5(Oxidation)	Acetyl:2H(3)@Any N-term;Oxidation@M	0;6	27	QE	0.0691636	DYDDMSPR	0.91395	0.932357	0.764502	0.465726	4	0.782336	0.959476	1	RR	TRUE	trypsin	3	8	2	0.2	0.272727
High	[R].gPAYGLSR.[E]	HCD	1.6	0.00058	0.0049	0.38	0.37	1	Sequest HT (2)	2	511.284	-1.18	55.8998	14040	14040	P37802	ArgAcetylD3	RGPAYGLSR	9	2	55.9	796	9		N-Term(ArgAcetylD3)	Acetyl:2H(3)@Any N-term	0	27	QE	0.0718182	GPAYGLSR	0.837815	0.865054	0.665432	0.37665	4	0.402546	0.901654	0	NR	TRUE	trypsin	0	9	6	0.4	0
High	[R].vQDELAR.[S]	HCD	1.59	0.00076	0.007	0.337	0.07	1	Sequest HT (2)	2	516.287	-0.98	56.1658	14155	14155	Q13049	ArgAcetylD3	RVQDELAR	8	2	56.166	797	8		N-Term(ArgAcetylD3)	Acetyl:2H(3)@Any N-term	0	27	QE	0.0742364	VQDELAR	0.943461	0.939506	0.77743	0.711275	4	0.899404	0.97227	1	RR	TRUE	trypsin	0	10	2	0.166667	0
High	[R].gTPQQIDYAR.[Q]	HCD	2.72	0.00011	0.00037	0.782	0.43	1	Sequest HT (2)	2	675.354	0.09	57.5058	14761	14761	Q96AE4	ArgAcetylD3	RGTPQQIDYAR	11	2	57.506	798	11		N-Term(ArgAcetylD3)	Acetyl:2H(3)@Any N-term	0	27	QE	0.0864182	GTPQQIDYAR	0.963922	0.967746	0.837872	0.60272	5	0.94727	0.969797	0	IR	TRUE	trypsin	0	12	5	0.294118	0
High	[R].kPASGGLAASSSAPAR.[Q]	HCD	1.7	0.0019	0.021	0.216	0.42	1	Sequest HT (2)	2	837.463	-0.33	58.0992	15024	15024	P20585	ArgAcetylD3	RKPASGGLAASSSAPAR	17	2	58.099	799	17		N-Term(ArgAcetylD3);K1(Acetyl:2H(3))	Acetyl:2H(3)@Any N-term;Acetyl:2H(3)@K	0;2	27	QE	0.0918091	KPASGGLAASSSAPAR	0.858703	0.868899	0.670344	0.601213	3	0.430985	0.95658	1	RR	TRUE	trypsin	2	4	3	0.428571	0.333333
High	[R].lELGQR.[E]	HCD	2.26	0.0028	0.037	0.158	0.24	1	Sequest HT (2)	2	458.773	-0.61	58.8443	15369	15369	Q6UWE0	ArgAcetylD3	RLELGQR	7	2	58.844	800	7		N-Term(ArgAcetylD3)	Acetyl:2H(3)@Any N-term	0	27	QE	0.0985818	LELGQR	0.900795	0.925035	0.75193	0.51913	4	0.622051	0.946901	1	RR	TRUE	trypsin	1	8	2	0.2	0.111111
High	[R].fNINDR.[I]	HCD	2.47	0.0067	0.092	0.057	0.34	1	Sequest HT (2)	2	490.261	0.9	59.5726	15709	15709	P19484; O75030; P19532	ArgAcetylD3	RFNINDR	7	2	59.573	801	7		N-Term(ArgAcetylD3)	Acetyl:2H(3)@Any N-term	0	27	QE	0.105209	FNINDR	0.968152	0.971432	0.847462	0.43913	5	0.694548	0.984127	1	RR;RR;RR	TRUE	trypsin	2	9	2	0.181818	0.181818
High	[R].aGIkTHVEkEDGEAR.[E]	HCD	6.12	1.3e-05	1.7e-08	2.69	0.51	1	Sequest HT (2)	3	644.347	-1.15	59.6543	15747	15747	Q13573	ArgAcetylD3	RAGIKTHVEKEDGEAR	16	3	59.654	802	16		N-Term(ArgAcetylD3);K4(Acetyl:2H(3));K9(Acetyl:2H(3))	Acetyl:2H(3)@Any N-term;Acetyl:2H(3)@K;Acetyl:2H(3)@K	0;5;10	27	QE	0.105945	AGIKTHVEKEDGEAR	0.984	0.987874	0.900759	0.782189	16	0.983909	0.984041	1	RR	TRUE	trypsin	4	25	2	0.0740741	0.137931
High	[R].kTVkEkDDTGPkkHSSkNSER.[A]	HCD	3.59	1.3e-05	2.6e-05	1.3	0.77	1	Sequest HT (2)	3	957.526	-2.74	60.6914	16220	16220	Q9Y388	ArgAcetylD3	RKTVKEKDDTGPKKHSSKNSER	22	3	60.691	803	22		N-Term(ArgAcetylD3);K1(Acetyl:2H(3));K4(Acetyl:2H(3));K6(Acetyl:2H(3));K12(Acetyl:2H(3));K13(Acetyl:2H(3));K17(Acetyl:2H(3))	Acetyl:2H(3)@Any N-term;Acetyl:2H(3)@K;Acetyl:2H(3)@K;Acetyl:2H(3)@K;Acetyl:2H(3)@K;Acetyl:2H(3)@K;Acetyl:2H(3)@K	0;2;5;7;13;14;18	27	QE	0.115373	KTVKEKDDTGPKKHSSKNSER	0.941332	0.948008	0.793812	0.473028	7	0.932318	0.942805	1	RR	TRUE	trypsin	0	18	14	0.4375	0
High	[R].lVkkEPR.[Q]	HCD	2.02	0.00062	0.0052	0.373	0.06	1	Sequest HT (2)	2	580.877	-0.01	62.3254	16969	16969	P21709	ArgAcetylD3	RLVKKEPR	8	2	62.325	804	8		N-Term(ArgAcetylD3);K3(Acetyl:2H(3));K4(Acetyl:2H(3))	Acetyl:2H(3)@Any N-term;Acetyl:2H(3)@K;Acetyl:2H(3)@K	0;4;5	27	QE	0.130227	LVKKEPR	0.458213	0.562901	0.380629	0.228243	3	-0.0458329	0.518448	0	LR	TRUE	trypsin	2	7	3	0.3	0.222222
High	[R].iPAVkER.[I]	HCD	1.93	0.00056	0.0046	0.386	0.18	1	Sequest HT (2)	2	529.833	0.75	62.3306	16972	16972	Q92598	ArgAcetylD3	RIPAVKER	8	2	62.331	805	8		N-Term(ArgAcetylD3);K5(Acetyl:2H(3))	Acetyl:2H(3)@Any N-term;Acetyl:2H(3)@K	0;6	27	QE	0.130282	IPAVKER	0.834216	0.859092	0.657942	0.240558	3	0.0907112	0.965434	0	TR	TRUE	trypsin	2	7	4	0.363636	0.222222
High	[R].aFDQIR.[M]	HCD	1.62	0.0038	0.052	0.122	0	1	Sequest HT (2)	2	475.765	-1.06	62.3957	16998	16998	P29401	ArgAcetylD3	RAFDQIR	7	2	62.396	806	7		N-Term(ArgAcetylD3)	Acetyl:2H(3)@Any N-term	0	27	QE	0.130873	AFDQIR	0.871099	0.897855	0.70975	0.506957	3	0.927496	0.862906	0	TR	TRUE	trypsin	1	8	2	0.2	0.111111
High	[R].dHDTFLAVR.[Y]	HCD	3.74	8.3e-05	0.00031	0.817	0.69	1	Sequest HT (2)	3	425.561	1.14	62.7104	17137	17137	Q12907	ArgAcetylD3	RDHDTFLAVR	10	3	62.71	807	10		N-Term(ArgAcetylD3)	Acetyl:2H(3)@Any N-term	0	27	QE	0.133727	DHDTFLAVR	0.992757	0.994711	0.934495	0.88906	10	0.991847	0.994062	0	NR	TRUE	trypsin	1	16	1	0.0588235	0.0588235
High	[R].tEEGPTLSYGR.[D]	HCD	3.27	1.3e-05	1.7e-05	1.38	0.43	1	Sequest HT (2)	2	705.857	0.62	62.7868	17172	17172	P43243	ArgAcetylD3	RTEEGPTLSYGR	12	2	62.787	808	12		N-Term(ArgAcetylD3)	Acetyl:2H(3)@Any N-term	0	27	QE	0.134427	TEEGPTLSYGR	0.844763	0.873317	0.676072	0.502396	6	0.654809	0.876585	1	RR	TRUE	trypsin	2	11	4	0.266667	0.153846
Low	[R].aEEQMLkER.[E]	HCD	1.39	0.52	1	-0.687	0.13	1	Sequest HT (2)	2	690.365	1.34	62.7926	17175	17175	Q14152	ArgAcetylD3	RAEEQMLKER	10	2	62.793	809	10		N-Term(ArgAcetylD3);K7(Acetyl:2H(3))	Acetyl:2H(3)@Any N-term;Acetyl:2H(3)@K	0;8	27	QE	0.134482	AEEQMLKER	0.82299	0.822314	0.614635	-0.516988	2	-0.139944	0.936307	1	RR	TRUE	trypsin	1	3	14	0.823529	0.25
High	[R].dVQLIR.[S]	HCD	2.11	0.0093	0.13	0.01	0.02	1	Sequest HT (2)	2	472.789	-0.81	62.9392	17242	17242	Q15149	ArgAcetylD3	RDVQLIR	7	2	62.939	810	7		N-Term(ArgAcetylD3)	Acetyl:2H(3)@Any N-term	0	27	QE	0.135809	DVQLIR	0.960994	0.968785	0.840517	0.421739	8	0.740964	0.979901	1	RR	TRUE	trypsin	3	11	2	0.153846	0.214286
Low	[R].lESkIR.[E]	HCD	1.69	0.086	0.77	-0.28	0.15	1	Sequest HT (2)	2	496.311	-1.51	63.0779	17304	17304	P05783	ArgAcetylD3	RLESKIR	7	2	63.078	811	7		N-Term(ArgAcetylD3);K4(Acetyl:2H(3))	Acetyl:2H(3)@Any N-term;Acetyl:2H(3)@K	0;5	27	QE	0.137073	LESKIR	0.915643	0.923784	0.749841	0.406522	2	0.553149	0.945692	1	RR	TRUE	trypsin	1	6	3	0.333333	0.142857
High	[R].gYSFTTTAER.[E]	HCD	2.46	0.00037	0.0026	0.461	0.48	1	Sequest HT (2)	2	667.333	0.89	63.5063	17487	17487	P60709; P63261	ArgAcetylD3	RGYSFTTTAER	11	2	63.506	812	11		N-Term(ArgAcetylD3)	Acetyl:2H(3)@Any N-term	0	27	QE	0.140964	GYSFTTTAER	0.942367	0.947639	0.793075	0.55319	3	0.492194	0.969969	0	ER;ER	TRUE	trypsin	1	7	3	0.3	0.125
High	[R].iSAVSVAER.[V]	HCD	2.78	0.00022	0.0011	0.581	0.31	1	Sequest HT (2)	2	566.829	0.37	63.5644	17514	17514	Q08211	ArgAcetylD3	RISAVSVAER	10	2	63.564	813	10		N-Term(ArgAcetylD3)	Acetyl:2H(3)@Any N-term	0	27	QE	0.141491	ISAVSVAER	0.920128	0.931309	0.762664	0.715187	4	0.540565	0.956975	1	RR	TRUE	trypsin	0	9	2	0.181818	0
High	[R].aLELEQER.[K]	HCD	3.25	7.2e-05	0.00024	0.866	0.22	1	Sequest HT (2)	2	594.824	-0.64	63.5913	17528	17528	P26038	ArgAcetylD3	RALELEQER	9	2	63.591	814	9		N-Term(ArgAcetylD3)	Acetyl:2H(3)@Any N-term	0	27	QE	0.141736	ALELEQER	0.92195	0.938791	0.776106	0.532258	6	0.724435	0.954704	1	RR	TRUE	trypsin	2	11	2	0.153846	0.153846
High	[R].yLENGkETLQR.[AT]	HCD	3.09	0.00049	0.0037	0.414	0.44	1	Sequest HT (2)	2	798.934	-0.42	63.6576	17556	17556	P10321; P04439; P01893; P30511	ArgAcetylD3	RYLENGKETLQR	12	2	63.658	815	12		N-Term(ArgAcetylD3);K6(Acetyl:2H(3))	Acetyl:2H(3)@Any N-term;Acetyl:2H(3)@K	0;7	27	QE	0.142345	YLENGKETLQR	0.867596	0.879134	0.683757	0.347639	5	0.610567	0.909943	1	RR;RR;RR;RR	TRUE	trypsin	1	9	6	0.4	0.1
High	[R].lMkMNR.[G]	HCD	1.96	0.0031	0.041	0.146	0.45	1	Sequest HT (2)	2	519.795	1.1	63.7037	17578	17578	Q9P2J5	ArgAcetylD3	RLMKMNR	7	2	63.704	816	7		N-Term(ArgAcetylD3);K3(Acetyl:2H(3))	Acetyl:2H(3)@Any N-term;Acetyl:2H(3)@K	0;4	27	QE	0.142764	LMKMNR	0.922368	0.938539	0.77564	0.601304	4	0.498512	0.958839	1	RR	TRUE	trypsin	0	9	2	0.181818	0
Low	[R].tkTPGPGAQSALR.[A]	HCD	1.97	0.33	1	-0.524	0.09	1	Sequest HT (2)	2	765.44	4.31	63.7664	17606	17606	P62263	ArgAcetylD3	RTKTPGPGAQSALR	14	2	63.766	817	14		N-Term(ArgAcetylD3);K2(Acetyl:2H(3))	Acetyl:2H(3)@Any N-term;Acetyl:2H(3)@K	0;3	27	QE	0.143327	TKTPGPGAQSALR	0.555139	0.593373	0.404408	-0.0482796	4	0.00714663	0.58006	0	NR	TRUE	trypsin	6	3	5	0.625	0.666667
High	[R].nLELPR.[L]	HCD	2.12	0.0019	0.021	0.215	0.18	1	Sequest HT (2)	2	471.781	-1.3	63.7715	17608	17608	Q9UHB6	ArgAcetylD3	RNLELPR	7	2	63.772	818	7		N-Term(ArgAcetylD3)	Acetyl:2H(3)@Any N-term	0	27	QE	0.143382	NLELPR	0.946405	0.957424	0.813563	0.544348	4	0.876034	0.969291	1	RR	TRUE	trypsin	2	8	2	0.2	0.2
High	[R].iSAVSVAER.[V]	HCD	2.93	5.8e-05	0.0002	0.904	0.4	1	Sequest HT (2)	2	566.829	-1.24	64.095	17744	17744	Q08211	ArgAcetylD3	RISAVSVAER	10	2	64.095	819	10		N-Term(ArgAcetylD3)	Acetyl:2H(3)@Any N-term	0	27	QE	0.146318	ISAVSVAER	0.944558	0.949324	0.796461	0.533848	5	0.492716	0.977307	1	RR	TRUE	trypsin	2	9	2	0.181818	0.181818
High	[R].lEVEREAEkkR.[E]	HCD	2.71	8.3e-05	0.0003	0.824	0.17	1	Sequest HT (2)	3	559.991	-0.87	64.1016	17748	17748	Q96AG4	ArgAcetylD3	RLEVEREAEKKR	12	3	64.102	820	12		N-Term(ArgAcetylD3);K9(Acetyl:2H(3));K10(Acetyl:2H(3))	Acetyl:2H(3)@Any N-term;Acetyl:2H(3)@K;Acetyl:2H(3)@K	0;10;11	27	QE	0.146382	LEVEREAEKKR	0.816376	0.864009	0.664109	0.624947	8	0.78083	0.818097	1	RR	TRUE	trypsin	1	15	4	0.210526	0.0625
High	[R].aLELEQER.[K]	HCD	2.57	0.00025	0.0013	0.56	0.18	1	Sequest HT (2)	2	594.825	1.84	64.125	17757	17757	P26038	ArgAcetylD3	RALELEQER	9	2	64.125	821	9		N-Term(ArgAcetylD3)	Acetyl:2H(3)@Any N-term	0	27	QE	0.146591	ALELEQER	0.942695	0.950783	0.799436	0.598424	6	0.705674	0.971032	1	RR	TRUE	trypsin	1	11	2	0.153846	0.0833333
High	[R].tLEEkEQEEAR.[L]	HCD	3.13	2.3e-05	6e-05	1.15	0.51	1	Sequest HT (2)	2	804.409	-2.75	64.5923	17970	17970	Q9BUQ8	ArgAcetylD3	RTLEEKEQEEAR	12	2	64.592	822	12		N-Term(ArgAcetylD3);K5(Acetyl:2H(3))	Acetyl:2H(3)@Any N-term;Acetyl:2H(3)@K	0;6	27	QE	0.150836	TLEEKEQEEAR	0.93478	0.948091	0.793979	0.519803	6	0.860753	0.954382	1	RR	TRUE	trypsin	0	12	7	0.368421	0
High	[R].lGDSSGPALkR.[S]	HCD	2.73	5e-05	0.0001	1.04	0.38	1	Sequest HT (2)	2	673.886	-0.3	65.0085	18149	18149	Q9UHD8	ArgAcetylD3	RLGDSSGPALKR	12	2	65.008	823	12		N-Term(ArgAcetylD3);K10(Acetyl:2H(3))	Acetyl:2H(3)@Any N-term;Acetyl:2H(3)@K	0;11	27	QE	0.154618	LGDSSGPALKR	0.956375	0.961534	0.822852	0.640733	4	0.936549	0.97444	1	RR	TRUE	trypsin	0	10	4	0.285714	0
High	[R].lAALQkR.[E]	HCD	2.07	0.0015	0.016	0.248	0.57	1	Sequest HT (2)	2	523.341	-0.36	65.8587	18527	18527	Q99459	ArgAcetylD3	RLAALQKR	8	2	65.859	824	8		N-Term(ArgAcetylD3);K6(Acetyl:2H(3))	Acetyl:2H(3)@Any N-term;Acetyl:2H(3)@K	0;7	27	QE	0.162355	LAALQKR	0.859126	0.889377	0.697723	0.576628	4	0.377669	0.934702	1	RR	TRUE	trypsin	0	9	3	0.25	0
High	[R].lSkEEIER.[M]	HCD	2.79	0.00012	0.00047	0.737	0.3	1	Sequest HT (2)	2	625.354	-0.2	65.8857	18541	18541	P0DMV9; P34931	ArgAcetylD3	RLSKEEIER	9	2	65.886	825	9		N-Term(ArgAcetylD3);K3(Acetyl:2H(3))	Acetyl:2H(3)@Any N-term;Acetyl:2H(3)@K	0;4	27	QE	0.1626	LSKEEIER	0.933281	0.94447	0.786848	0.314699	5	0.705761	0.965458	0	GR;GR;GR	TRUE	trypsin	2	9	4	0.307692	0.181818
High	[R].vTkEkEkkTkQDR.[T]	HCD	3.29	1.3e-05	1.5e-05	1.42	0.65	1	Sequest HT (2)	2	1022.61	-0.04	65.9414	18566	18566	O00203	ArgAcetylD3	RVTKEKEKKTKQDR	14	2	65.941	826	14		N-Term(ArgAcetylD3);K3(Acetyl:2H(3));K5(Acetyl:2H(3));K7(Acetyl:2H(3));K8(Acetyl:2H(3));K10(Acetyl:2H(3))	Acetyl:2H(3)@Any N-term;Acetyl:2H(3)@K;Acetyl:2H(3)@K;Acetyl:2H(3)@K;Acetyl:2H(3)@K;Acetyl:2H(3)@K	0;4;6;8;9;11	27	QE	0.1631	VTKEKEKKTKQDR	0.962892	0.964363	0.829531	0.780543	5	0.945473	0.970417	1	RR	TRUE	trypsin	3	9	0	0	0.25
High	[R].vTkEkEkkTkQDR.[T]	HCD	2.14	0.00062	0.0052	0.372	0.53	1	Sequest HT (2)	3	682.073	-0.68	65.9734	18580	18580	O00203	ArgAcetylD3	RVTKEKEKKTKQDR	14	3	65.973	827	14		N-Term(ArgAcetylD3);K3(Acetyl:2H(3));K5(Acetyl:2H(3));K7(Acetyl:2H(3));K8(Acetyl:2H(3));K10(Acetyl:2H(3))	Acetyl:2H(3)@Any N-term;Acetyl:2H(3)@K;Acetyl:2H(3)@K;Acetyl:2H(3)@K;Acetyl:2H(3)@K;Acetyl:2H(3)@K	0;4;6;8;9;11	27	QE	0.163391	VTKEKEKKTKQDR	0.752279	0.77628	0.565792	0.174678	2	0.7683	0.743074	1	RR	TRUE	trypsin	0	7	13	0.65	0
Medium	[R].kEPkSQDIYLR.[L]	HCD	2.15	0.01	0.15	-0.003	0.4	1	Sequest HT (2)	3	556.653	0.86	65.9896	18587	18587	Q07020	ArgAcetylD3	RKEPKSQDIYLR	12	3	65.99	828	12		N-Term(ArgAcetylD3);K1(Acetyl:2H(3));K4(Acetyl:2H(3))	Acetyl:2H(3)@Any N-term;Acetyl:2H(3)@K;Acetyl:2H(3)@K	0;2;5	27	QE	0.163545	KEPKSQDIYLR	0.683363	0.729308	0.520316	0.056871	1	0.00857195	0.806471	1	RR	TRUE	trypsin	1	7	11	0.611111	0.125
Low	[R].lPNkELSR.[E]	HCD	1.24	0.12	0.85	-0.333	0.04	1	Sequest HT (2)	2	601.86	0.19	66.1336	18650	18650	Q8NHM5	ArgAcetylD3	RLPNKELSR	9	2	66.134	829	9		N-Term(ArgAcetylD3);K4(Acetyl:2H(3))	Acetyl:2H(3)@Any N-term;Acetyl:2H(3)@K	0;5	27	QE	0.164855	LPNKELSR	0.830446	0.832554	0.626245	0.270528	2	0.364133	0.892379	1	RR	TRUE	trypsin	1	8	6	0.428571	0.111111
High	[R].dPEEPEkTELSER.[E]	HCD	2.07	0.00085	0.0079	0.324	0.58	1	Sequest HT (2)	2	902.944	-1.11	66.198	18677	18677	Q96BP3	ArgAcetylD3	RDPEEPEKTELSER	14	2	66.198	830	14		N-Term(ArgAcetylD3);K7(Acetyl:2H(3))	Acetyl:2H(3)@Any N-term;Acetyl:2H(3)@K	0;8	27	QE	0.165436	DPEEPEKTELSER	0.897877	0.913622	0.733454	0.478613	5	0.956265	0.840167	1	RR	TRUE	trypsin	2	10	5	0.333333	0.166667
High	[R].aIADmLR.[A]	HCD	1.67	0.0065	0.089	0.061	0.31	1	Sequest HT (2)	2	503.781	-0.19	66.5068	18811	18811	Q9Y490	ArgAcetylD3	RAIADMLR	8	2	66.507	831	8		N-Term(ArgAcetylD3);M5(Oxidation)	Acetyl:2H(3)@Any N-term;Oxidation@M	0;6	27	QE	0.168245	AIADMLR	0.919337	0.930586	0.761403	0.595512	4	0.867775	0.982475	1	RR	TRUE	trypsin	1	8	2	0.2	0.111111
High	[R].fYEQmNGPVAGASR.[Q]	HCD	2.03	0.00023	0.0012	0.568	0.54	1	Sequest HT (2)	2	872.421	2.34	66.5774	18845	18845	P29692	ArgAcetylD3	RFYEQMNGPVAGASR	15	2	66.577	832	15		N-Term(ArgAcetylD3);M5(Oxidation)	Acetyl:2H(3)@Any N-term;Oxidation@M	0;6	27	QE	0.168882	FYEQMNGPVAGASR	0.946351	0.952035	0.802025	0.831784	1	0.79003	0.973557	1	RR	TRUE	trypsin	1	7	1	0.125	0.125
High	[R].fYEQmNGPVAGASR.[Q]	HCD	3.77	5e-05	0.0001	1.04	0.56	1	Sequest HT (2)	3	581.947	-3.1	66.6	18856	18856	P29692	ArgAcetylD3	RFYEQMNGPVAGASR	15	3	66.6	833	15		N-Term(ArgAcetylD3);M5(Oxidation)	Acetyl:2H(3)@Any N-term;Oxidation@M	0;6	27	QE	0.169091	FYEQMNGPVAGASR	0.976823	0.980252	0.873273	0.754785	8	0.890803	0.995267	1	RR	TRUE	trypsin	1	17	3	0.15	0.0555556
High	[R].vRPVAMVMPAR.[T]	HCD	2.82	0.00076	0.0067	0.342	0.33	1	Sequest HT (2)	3	476.61	0.12	66.7688	18933	18933	Q15149	ArgAcetylD3	RVRPVAMVMPAR	12	3	66.769	834	12		N-Term(ArgAcetylD3)	Acetyl:2H(3)@Any N-term	0	27	QE	0.170627	VRPVAMVMPAR	0.952546	0.955939	0.810316	0.570895	5	0.746881	0.994212	NA	NA	FALSE	trypsin	0	12	6	0.333333	0
High	[R].vTkVLGR.[T]	HCD	2.27	0.0012	0.012	0.274	0.28	1	Sequest HT (2)	2	509.836	0.16	66.9115	18996	18996	P62857	ArgAcetylD3	RVTKVLGR	8	2	66.912	835	8		N-Term(ArgAcetylD3);K3(Acetyl:2H(3))	Acetyl:2H(3)@Any N-term;Acetyl:2H(3)@K	0;4	27	QE	0.171927	VTKVLGR	0.910693	0.926939	0.75514	0.366448	5	0.521452	0.94012	0	AR	TRUE	trypsin	3	10	2	0.166667	0.230769
High	[R].lVTIkR.[S]	HCD	1.77	0.0018	0.019	0.225	0.14	1	Sequest HT (2)	2	488.333	0.56	67.1612	19104	19104	P46013	ArgAcetylD3	RLVTIKR	7	2	67.161	836	7		N-Term(ArgAcetylD3);K5(Acetyl:2H(3))	Acetyl:2H(3)@Any N-term;Acetyl:2H(3)@K	0;6	27	QE	0.174191	LVTIKR	0.922367	0.936404	0.771735	0.525217	4	0.416739	0.961596	1	RR	TRUE	trypsin	1	8	2	0.2	0.111111
High	[R].aIADmLR.[A]	HCD	1.52	0.0015	0.015	0.25	0.3	1	Sequest HT (2)	2	503.783	4.31	67.6317	19314	19314	Q9Y490	ArgAcetylD3	RAIADMLR	8	2	67.632	837	8		N-Term(ArgAcetylD3);M5(Oxidation)	Acetyl:2H(3)@Any N-term;Oxidation@M	0;6	27	QE	0.178473	AIADMLR	0.921554	0.93222	0.764262	0.602627	5	0.86452	0.989905	1	RR	TRUE	trypsin	1	8	2	0.2	0.111111
High	[R].sGkLkDLSR.[F]	HCD	2.75	7.2e-05	0.00024	0.869	0.4	1	Sequest HT (2)	2	647.891	-3.26	67.6785	19335	19335	P49327	ArgAcetylD3	RSGKLKDLSR	10	2	67.678	838	10		N-Term(ArgAcetylD3);K3(Acetyl:2H(3));K5(Acetyl:2H(3))	Acetyl:2H(3)@Any N-term;Acetyl:2H(3)@K;Acetyl:2H(3)@K	0;4;6	27	QE	0.178891	SGKLKDLSR	0.940963	0.950901	0.79968	0.487259	6	0.941152	0.947662	1	RR	TRUE	trypsin	2	11	3	0.214286	0.153846
High	[R].sGkLkDLSR.[F]	HCD	2.92	0.0002	0.0009	0.619	0.5	1	Sequest HT (2)	3	432.264	-1.33	67.8019	19395	19395	P49327	ArgAcetylD3	RSGKLKDLSR	10	3	67.802	839	10		N-Term(ArgAcetylD3);K3(Acetyl:2H(3));K5(Acetyl:2H(3))	Acetyl:2H(3)@Any N-term;Acetyl:2H(3)@K;Acetyl:2H(3)@K	0;4;6	27	QE	0.180018	SGKLKDLSR	0.977732	0.982083	0.879308	0.746976	7	0.966599	0.979291	1	RR	TRUE	trypsin	2	12	1	0.0769231	0.142857
High	[R].gTTVYLcEkR.[I]	HCD	2.39	0.00013	0.0005	0.725	0.26	1	Sequest HT (2)	2	736.895	1.67	67.8372	19409	19409	Q9Y2L1	ArgAcetylD3	RGTTVYLCEKR	11	2	67.837	840	11		N-Term(ArgAcetylD3);C7(Carbamidomethyl);K9(Acetyl:2H(3))	Acetyl:2H(3)@Any N-term;Carbamidomethyl@C;Acetyl:2H(3)@K	0;8;10	27	QE	0.180336	GTTVYLCEKR	0.94056	0.950457	0.798769	0.669887	6	0.74538	0.964552	1	RR	TRUE	trypsin	1	13	2	0.133333	0.0714286
High	[R].ekAEGDVAALNR.[I]	HCD	4.65	1.3e-05	2.8e-06	1.73	0.46	1	Sequest HT (2)	2	759.911	0.8	68.1001	19525	19525	P67936	ArgAcetylD3	REKAEGDVAALNR	13	2	68.1	841	13		N-Term(ArgAcetylD3);K2(Acetyl:2H(3))	Acetyl:2H(3)@Any N-term;Acetyl:2H(3)@K	0;3	27	QE	0.182727	EKAEGDVAALNR	0.967293	0.971951	0.848863	0.647199	8	0.953768	0.97479	1	RR	TRUE	trypsin	3	13	2	0.133333	0.1875
High	[R].ekAEGDVAALNR.[I]	HCD	4.74	1.3e-05	1.4e-05	1.43	0.48	1	Sequest HT (2)	3	506.943	0.04	68.1207	19534	19534	P67936	ArgAcetylD3	REKAEGDVAALNR	13	3	68.121	842	13		N-Term(ArgAcetylD3);K2(Acetyl:2H(3))	Acetyl:2H(3)@Any N-term;Acetyl:2H(3)@K	0;3	27	QE	0.182918	EKAEGDVAALNR	0.996987	0.997399	0.954075	0.811604	13	0.997807	0.996669	1	RR	TRUE	trypsin	3	20	1	0.047619	0.130435
High	[R].aQkkAkLEEER.[K]	HCD	3.2	0.00012	0.00047	0.739	0.65	1	Sequest HT (2)	3	555.994	-0.3	68.2704	19600	19600	Q6N069	ArgAcetylD3	RAQKKAKLEEER	12	3	68.27	843	12		N-Term(ArgAcetylD3);K3(Acetyl:2H(3));K4(Acetyl:2H(3));K6(Acetyl:2H(3))	Acetyl:2H(3)@Any N-term;Acetyl:2H(3)@K;Acetyl:2H(3)@K;Acetyl:2H(3)@K	0;4;5;7	27	QE	0.184273	AQKKAKLEEER	0.993725	0.994943	0.935952	0.88513	7	0.968788	0.99737	1	RR	TRUE	trypsin	1	15	1	0.0625	0.0625
High	[R].aPIIAVTR.[N]	HCD	2.11	0.00025	0.0013	0.56	0.52	1	Sequest HT (2)	2	521.334	0.32	68.8421	19858	19858	P14618	ArgAcetylD3	RAPIIAVTR	9	2	68.842	844	9		N-Term(ArgAcetylD3)	Acetyl:2H(3)@Any N-term	0	27	QE	0.189473	APIIAVTR	0.831649	0.869427	0.671023	0.520161	6	0.368	0.922416	0	PR	TRUE	trypsin	0	11	5	0.3125	0
High	[R].lkEEIER.[A]	HCD	2.79	0.00029	0.0017	0.523	0.23	1	Sequest HT (2)	2	581.839	0.07	68.8944	19881	19881	Q05682	ArgAcetylD3	RLKEEIER	8	2	68.894	845	8		N-Term(ArgAcetylD3);K2(Acetyl:2H(3))	Acetyl:2H(3)@Any N-term;Acetyl:2H(3)@K	0;3	27	QE	0.189945	LKEEIER	0.959638	0.967039	0.836094	0.57225	4	0.883865	0.977937	1	RR	TRUE	trypsin	1	10	3	0.230769	0.0909091
High	[R].vVRVPTATLVR.[V]	HCD	3.66	0.00018	0.00071	0.663	0.53	1	Sequest HT (2)	3	471.301	-2.78	68.9935	19925	19925	Q9P2B2	ArgAcetylD3	RVVRVPTATLVR	12	3	68.994	846	12		N-Term(ArgAcetylD3)	Acetyl:2H(3)@Any N-term	0	27	QE	0.190855	VVRVPTATLVR	0.928837	0.942596	0.783247	0.508668	8	0.922818	0.928813	0	GR	TRUE	trypsin	4	14	3	0.176471	0.222222
High	[R].kELkkIR.[V]	HCD	1.29	0.00054	0.0045	0.389	0.4	1	Sequest HT (2)	2	625.92	0.23	70.5604	20643	20643	Q8N302	ArgAcetylD3	RKELKKIR	8	2	70.56	847	8		N-Term(ArgAcetylD3);K1(Acetyl:2H(3));K4(Acetyl:2H(3));K5(Acetyl:2H(3))	Acetyl:2H(3)@Any N-term;Acetyl:2H(3)@K;Acetyl:2H(3)@K;Acetyl:2H(3)@K	0;2;5;6	27	QE	0.205091	KELKKIR	0.948084	0.941785	0.781705	0.495895	3	0.692559	0.963745	1	RR	TRUE	trypsin	0	8	4	0.333333	0
High	[R].kLLEGEEER.[L]	HCD	2.65	7.2e-05	0.00024	0.868	0.35	1	Sequest HT (2)	2	674.871	0.13	70.6361	20679	20679	Q03252; P02545; P20700	ArgAcetylD3	RKLLEGEEER	10	2	70.636	848	10		N-Term(ArgAcetylD3);K1(Acetyl:2H(3))	Acetyl:2H(3)@Any N-term;Acetyl:2H(3)@K	0;2	27	QE	0.205782	KLLEGEEER	0.968525	0.975409	0.858526	0.746718	6	0.861379	0.982203	0	YR;YR;YR	TRUE	trypsin	1	12	2	0.142857	0.0769231
High	[R].iQSGLGALSR.[S]	HCD	3.18	0.00064	0.0054	0.368	0.34	1	Sequest HT (2)	2	601.856	0.67	72.1897	21380	21380	Q969G5	ArgAcetylD3	RIQSGLGALSR	11	2	72.19	849	11		N-Term(ArgAcetylD3)	Acetyl:2H(3)@Any N-term	0	27	QE	0.219909	IQSGLGALSR	0.950388	0.956434	0.811393	0.594934	6	0.576003	0.980448	1	RR	TRUE	trypsin	2	10	2	0.166667	0.166667
High	[R].kEPkSQDIYLR.[L]	HCD	3.29	1.3e-05	4.5e-05	1.2	0.4	1	Sequest HT (2)	2	834.475	-0.22	72.6032	21561	21561	Q07020	ArgAcetylD3	RKEPKSQDIYLR	12	2	72.603	850	12		N-Term(ArgAcetylD3);K1(Acetyl:2H(3));K4(Acetyl:2H(3))	Acetyl:2H(3)@Any N-term;Acetyl:2H(3)@K;Acetyl:2H(3)@K	0;2;5	27	QE	0.223664	KEPKSQDIYLR	0.971965	0.976939	0.863016	0.688724	7	0.975319	0.973351	1	RR	TRUE	trypsin	1	13	3	0.1875	0.0714286
High	[R].kEPkSQDIYLR.[L]	HCD	2.63	0.00036	0.0024	0.471	0.51	1	Sequest HT (2)	3	556.652	-0.71	72.7247	21615	21615	Q07020	ArgAcetylD3	RKEPKSQDIYLR	12	3	72.725	851	12		N-Term(ArgAcetylD3);K1(Acetyl:2H(3));K4(Acetyl:2H(3))	Acetyl:2H(3)@Any N-term;Acetyl:2H(3)@K;Acetyl:2H(3)@K	0;2;5	27	QE	0.224773	KEPKSQDIYLR	0.976497	0.980572	0.874307	0.645948	6	0.990068	0.969872	1	RR	TRUE	trypsin	1	13	5	0.277778	0.0714286
Medium	[R].yQkSTELLIR.[K]	HCD	2.48	0.016	0.25	-0.065	0.29	1	Sequest HT (2)	2	748.938	-0.97	73.2259	21840	21840	P68431; Q16695; Q5TEC6; Q6NXT2; P84243; Q71DI3	ArgAcetylD3	RYQKSTELLIR	11	2	73.226	852	11		N-Term(ArgAcetylD3);K3(Acetyl:2H(3))	Acetyl:2H(3)@Any N-term;Acetyl:2H(3)@K	0;4	27	QE	0.229327	YQKSTELLIR	0.945615	0.941986	0.782087	0.627392	4	0.869488	0.963464	1	RR;RR;RR;RR;RR;RR	TRUE	trypsin	0	7	4	0.363636	0
High	[R].lASTSDIEEkENRDSSSLR.[T]	HCD	4.2	1.3e-05	3.7e-07	2.11	0.55	1	Sequest HT (2)	3	795.069	-1.29	73.7772	22098	22098	O14974	ArgAcetylD3	RLASTSDIEEKENRDSSSLR	20	3	73.777	853	20		N-Term(ArgAcetylD3);K10(Acetyl:2H(3))	Acetyl:2H(3)@Any N-term;Acetyl:2H(3)@K	0;11	27	QE	0.234336	LASTSDIEEKENRDSSSLR	0.931136	0.94261	0.783273	0.784908	7	0.962136	0.909914	1	RR	TRUE	trypsin	0	17	4	0.190476	0
High	[R].vEELVAkR.[V]	HCD	3.01	0.00012	0.00048	0.732	0.31	1	Sequest HT (2)	2	595.362	0.17	73.9627	22187	22187	Q9NWB6	ArgAcetylD3	RVEELVAKR	9	2	73.963	854	9		N-Term(ArgAcetylD3);K7(Acetyl:2H(3))	Acetyl:2H(3)@Any N-term;Acetyl:2H(3)@K	0;8	27	QE	0.236027	VEELVAKR	0.917391	0.934585	0.768459	0.665506	6	0.633522	0.951099	1	RR	TRUE	trypsin	0	13	2	0.133333	0
High	[R].vEELVAkR.[V]	HCD	2.48	0.00052	0.0044	0.393	0.24	1	Sequest HT (2)	2	595.358	-6.3	74.4873	22416	22416	Q9NWB6	ArgAcetylD3	RVEELVAKR	9	2	74.487	855	9		N-Term(ArgAcetylD3);K7(Acetyl:2H(3))	Acetyl:2H(3)@Any N-term;Acetyl:2H(3)@K	0;8	27	QE	0.240791	VEELVAKR	0.903676	0.913747	0.733649	0.502199	6	0.605139	0.924886	1	RR	TRUE	trypsin	2	13	2	0.133333	0.133333
High	[R].iAAEEkkkQDELkR.[I]	HCD	4.8	5.8e-05	0.00021	0.893	0.65	1	Sequest HT (2)	3	689.739	-0.63	74.9987	22652	22652	P56385	ArgAcetylD3	RIAAEEKKKQDELKR	15	3	74.999	856	15		N-Term(ArgAcetylD3);K6(Acetyl:2H(3));K7(Acetyl:2H(3));K8(Acetyl:2H(3));K13(Acetyl:2H(3))	Acetyl:2H(3)@Any N-term;Acetyl:2H(3)@K;Acetyl:2H(3)@K;Acetyl:2H(3)@K;Acetyl:2H(3)@K	0;7;8;9;14	27	QE	0.245445	IAAEEKKKQDELKR	0.950728	0.960297	0.820008	0.793233	8	0.982454	0.943769	1	RR	TRUE	trypsin	2	16	2	0.111111	0.111111
High	[R].qQEGFkGTFPDAR.[E]	HCD	1.86	0.00028	0.0016	0.529	0.48	1	Sequest HT (2)	2	863.941	-1.28	75.4547	22846	22846	Q15233	ArgAcetylD3	RQQEGFKGTFPDAR	14	2	75.455	857	14		N-Term(ArgAcetylD3);K6(Acetyl:2H(3))	Acetyl:2H(3)@Any N-term;Acetyl:2H(3)@K	0;7	27	QE	0.249591	QQEGFKGTFPDAR	0.957368	0.960456	0.82037	0.197302	3	0.959525	0.960093	1	RR	TRUE	trypsin	1	6	10	0.625	0.142857
High	[R].lLEGEDAHLTQYkkEPVTTR.[Q]	HCD	3.03	0.00033	0.0019	0.505	0.36	1	Sequest HT (2)	4	655.606	-1.82	76.0609	23110	23110	Q04695	ArgAcetylD3	RLLEGEDAHLTQYKKEPVTTR	21	4	76.061	858	21		N-Term(ArgAcetylD3);K13(Acetyl:2H(3));K14(Acetyl:2H(3))	Acetyl:2H(3)@Any N-term;Acetyl:2H(3)@K;Acetyl:2H(3)@K	0;14;15	27	QE	0.2551	LLEGEDAHLTQYKKEPVTTR	0.932687	0.935678	0.770422	0.252872	7	0.554237	0.983068	1	RR	TRUE	trypsin	4	13	10	0.434783	0.235294
High	[R].tNEkVELQELNDR.[F]	HCD	4.43	5.8e-05	0.0002	0.9	0.62	1	Sequest HT (2)	3	611.99	-0.49	76.3421	23220	23220	P08670; P17661	ArgAcetylD3	RTNEKVELQELNDR	14	3	76.342	859	14		N-Term(ArgAcetylD3);K4(Acetyl:2H(3))	Acetyl:2H(3)@Any N-term;Acetyl:2H(3)@K	0;5	27	QE	0.257655	TNEKVELQELNDR	0.976917	0.982036	0.879151	0.742295	8	0.99132	0.97403	0	TR;TR	TRUE	trypsin	2	16	3	0.157895	0.111111
High	[R].tTPSYVAFTDTER.[L]	HCD	2.91	1.3e-05	1.5e-05	1.41	0.5	1	Sequest HT (2)	2	844.92	0	76.4488	23265	23265	P11142; P0DMV9; P17066; P54652; P48741; P34931	ArgAcetylD3	RTTPSYVAFTDTER	14	2	76.449	860	14		N-Term(ArgAcetylD3)	Acetyl:2H(3)@Any N-term	0	27	QE	0.258627	TTPSYVAFTDTER	0.931336	0.940768	0.779788	0.483395	6	0.890638	0.939684	0	NR;NR;NR;NR;NR;NR;NR	TRUE	trypsin	2	12	5	0.294118	0.142857
High	[R].lEEVkLkR.[E]	HCD	3.42	7.2e-05	0.00025	0.863	0.48	1	Sequest HT (2)	2	653.413	-0.41	76.4812	23284	23284	Q9NQS7	ArgAcetylD3	RLEEVKLKR	9	2	76.481	861	9		N-Term(ArgAcetylD3);K5(Acetyl:2H(3));K7(Acetyl:2H(3))	Acetyl:2H(3)@Any N-term;Acetyl:2H(3)@K;Acetyl:2H(3)@K	0;6;8	27	QE	0.258918	LEEVKLKR	0.92123	0.93596	0.770931	0.499633	4	0.431591	0.958322	1	RR	TRUE	trypsin	0	11	4	0.266667	0
High	[R].tTPSYVAFTDTER.[L]	HCD	3.65	0.00058	0.0049	0.379	0.54	1	Sequest HT (2)	3	563.615	-1.28	76.4825	23285	23285	P11142; P0DMV9; P17066; P54652; P48741; P34931	ArgAcetylD3	RTTPSYVAFTDTER	14	3	76.482	862	14		N-Term(ArgAcetylD3)	Acetyl:2H(3)@Any N-term	0	27	QE	0.258927	TTPSYVAFTDTER	0.99062	0.992146	0.920162	0.879237	5	0.996592	0.986127	0	NR;NR;NR;NR;NR;NR;NR	TRUE	trypsin	0	13	2	0.133333	0
High	[R].lEEVkLkR.[E]	HCD	2.84	0.00026	0.0014	0.552	0.47	1	Sequest HT (2)	3	435.944	-1.29	76.5815	23327	23327	Q9NQS7	ArgAcetylD3	RLEEVKLKR	9	3	76.582	863	9		N-Term(ArgAcetylD3);K5(Acetyl:2H(3));K7(Acetyl:2H(3))	Acetyl:2H(3)@Any N-term;Acetyl:2H(3)@K;Acetyl:2H(3)@K	0;6;8	27	QE	0.259836	LEEVKLKR	0.980148	0.982731	0.881519	0.701979	3	0.921942	0.998312	1	RR	TRUE	trypsin	0	10	3	0.230769	0
High	[R].tNSTFNQVVLkR.[L]	HCD	4.23	1.3e-05	9.9e-06	1.49	0.51	1	Sequest HT (2)	2	826.973	2.27	76.6599	23362	23362	Q07020	ArgAcetylD3	RTNSTFNQVVLKR	13	2	76.66	864	13		N-Term(ArgAcetylD3);K11(Acetyl:2H(3))	Acetyl:2H(3)@Any N-term;Acetyl:2H(3)@K	0;12	27	QE	0.260545	TNSTFNQVVLKR	0.937989	0.947103	0.79201	0.583369	7	0.69338	0.970405	1	RR	TRUE	trypsin	3	13	2	0.133333	0.1875
High	[R].tNSTFNQVVLkR.[L]	HCD	4.33	0.00018	0.00074	0.655	0.58	1	Sequest HT (2)	3	551.65	-0.36	76.6756	23369	23369	Q07020	ArgAcetylD3	RTNSTFNQVVLKR	13	3	76.676	865	13		N-Term(ArgAcetylD3);K11(Acetyl:2H(3))	Acetyl:2H(3)@Any N-term;Acetyl:2H(3)@K	0;12	27	QE	0.260691	TNSTFNQVVLKR	0.995217	0.995977	0.942876	0.825065	8	0.981212	0.998749	1	RR	TRUE	trypsin	1	15	2	0.117647	0.0625
High	[R].fYEQMNGPVAGASR.[Q]	HCD	4.57	1.3e-05	1.9e-07	2.23	0.61	1	Sequest HT (2)	2	864.421	-0.98	76.8245	23433	23433	P29692	ArgAcetylD3	RFYEQMNGPVAGASR	15	2	76.824	866	15		N-Term(ArgAcetylD3)	Acetyl:2H(3)@Any N-term	0	27	QE	0.262036	FYEQMNGPVAGASR	0.870086	0.894561	0.705023	0.47717	8	0.617511	0.93144	1	RR	TRUE	trypsin	6	12	2	0.142857	0.333333
High	[R].eLDESLQVAER.[L]	HCD	4.25	1.3e-05	3.8e-07	2.1	0.55	1	Sequest HT (2)	2	745.389	1.26	76.8478	23444	23444	P10909	ArgAcetylD3	RELDESLQVAER	12	2	76.848	867	12		N-Term(ArgAcetylD3)	Acetyl:2H(3)@Any N-term	0	27	QE	0.262255	ELDESLQVAER	0.950745	0.958801	0.816625	0.641649	8	0.939026	0.962851	1	RR	TRUE	trypsin	2	14	3	0.176471	0.125
High	[R].fYEQMNGPVAGASR.[Q]	HCD	4.89	1.3e-05	4.6e-05	1.19	0.73	1	Sequest HT (2)	3	576.617	-0.6	76.9157	23473	23473	P29692	ArgAcetylD3	RFYEQMNGPVAGASR	15	3	76.916	868	15		N-Term(ArgAcetylD3)	Acetyl:2H(3)@Any N-term	0	27	QE	0.262873	FYEQMNGPVAGASR	0.983045	0.98601	0.893387	0.756596	7	0.983663	0.982461	1	RR	TRUE	trypsin	1	17	4	0.190476	0.0555556
High	[R].eLDESLQVAER.[L]	HCD	3.67	1.3e-05	2.9e-06	1.72	0.52	1	Sequest HT (2)	2	745.387	-1.53	77.3696	23669	23669	P10909	ArgAcetylD3	RELDESLQVAER	12	2	77.37	869	12		N-Term(ArgAcetylD3)	Acetyl:2H(3)@Any N-term	0	27	QE	0.267	ELDESLQVAER	0.968221	0.972375	0.850015	0.502537	6	0.908788	0.987895	1	RR	TRUE	trypsin	1	11	6	0.352941	0.0833333
High	[R].kQEELQQLEQQR.[Q]	HCD	5.17	1.3e-05	1.5e-05	1.41	0.52	1	Sequest HT (2)	3	601.659	-0.34	77.4914	23720	23720	Q15149	ArgAcetylD3	RKQEELQQLEQQR	13	3	77.491	870	13		N-Term(ArgAcetylD3);K1(Acetyl:2H(3))	Acetyl:2H(3)@Any N-term;Acetyl:2H(3)@K	0;2	27	QE	0.2681	KQEELQQLEQQR	0.990889	0.992855	0.92385	0.906101	13	0.996344	0.983529	1	RR	TRUE	trypsin	1	20	1	0.047619	0.047619
High	[R].vGTASVLQPVkkR.[K]	HCD	4	0.00022	0.0012	0.579	0.7	1	Sequest HT (2)	3	558.683	-1.79	77.6377	23780	23780	Q2TAL8	ArgAcetylD3	RVGTASVLQPVKKR	14	3	77.638	871	14		N-Term(ArgAcetylD3);K11(Acetyl:2H(3));K12(Acetyl:2H(3))	Acetyl:2H(3)@Any N-term;Acetyl:2H(3)@K;Acetyl:2H(3)@K	0;12;13	27	QE	0.269436	VGTASVLQPVKKR	0.997347	0.997565	0.95556	0.759754	6	0.995619	0.998596	1	RR	TRUE	trypsin	2	13	2	0.133333	0.133333
High	[R].gGFAVQAkkPkRNEIDAEPPAkR.[H]	HCD	2.48	1.3e-05	2.8e-07	2.16	0.67	1	Sequest HT (2)	3	963.55	1.01	77.6598	23789	23789	Q8TDN6	ArgAcetylD3	RGGFAVQAKKPKRNEIDAEPPAKR	24	3	77.66	872	24		N-Term(ArgAcetylD3);K8(Acetyl:2H(3));K9(Acetyl:2H(3));K11(Acetyl:2H(3));K22(Acetyl:2H(3))	Acetyl:2H(3)@Any N-term;Acetyl:2H(3)@K;Acetyl:2H(3)@K;Acetyl:2H(3)@K;Acetyl:2H(3)@K	0;9;10;12;23	27	QE	0.269636	GGFAVQAKKPKRNEIDAEPPAKR	0.990588	0.991099	0.914997	0.787379	5	0.991129	0.991867	1	RR	TRUE	trypsin	1	9	3	0.25	0.1
High	[R].lckTVGATALPR.[L]	HCD	2.94	1.3e-05	4.4e-05	1.2	0.43	1	Sequest HT (2)	2	766.946	-0.56	77.7505	23827	23827	P50990	ArgAcetylD3	RLCKTVGATALPR	13	2	77.75	873	13		N-Term(ArgAcetylD3);C2(Carbamidomethyl);K3(Acetyl:2H(3))	Acetyl:2H(3)@Any N-term;Carbamidomethyl@C;Acetyl:2H(3)@K	0;3;4	27	QE	0.270455	LCKTVGATALPR	0.923929	0.934504	0.768313	0.508196	4	0.802149	0.942691	1	RR	TRUE	trypsin	4	8	2	0.2	0.333333
High	[R].lckTVGATALPR.[L]	HCD	4.84	1.3e-05	8.9e-06	1.51	0.62	1	Sequest HT (2)	3	511.633	0.08	77.8161	23856	23856	P50990	ArgAcetylD3	RLCKTVGATALPR	13	3	77.816	874	13		N-Term(ArgAcetylD3);C2(Carbamidomethyl);K3(Acetyl:2H(3))	Acetyl:2H(3)@Any N-term;Carbamidomethyl@C;Acetyl:2H(3)@K	0;3;4	27	QE	0.271055	LCKTVGATALPR	0.986567	0.989279	0.906695	0.896765	11	0.956522	0.990853	1	RR	TRUE	trypsin	1	20	1	0.047619	0.047619
High	[R].aLFLASR.[Q]	HCD	2.28	0.00038	0.0026	0.458	0.51	1	Sequest HT (2)	2	489.8	-0.08	77.9961	23934	23934	P08648	ArgAcetylD3	RALFLASR	8	2	77.996	875	8		N-Term(ArgAcetylD3)	Acetyl:2H(3)@Any N-term	0	27	QE	0.272691	ALFLASR	0.924072	0.935765	0.770579	0.5	5	0.595815	0.956601	1	RR	TRUE	trypsin	1	9	3	0.25	0.1
High	[R].eTNLDSLPLVDTHSkR.[T]	HCD	4.75	1.3e-05	3.3e-06	1.7	0.54	1	Sequest HT (2)	3	691.04	0.09	80.4884	24981	24981	P08670	ArgAcetylD3	RETNLDSLPLVDTHSKR	17	3	80.488	876	17		N-Term(ArgAcetylD3);K15(Acetyl:2H(3))	Acetyl:2H(3)@Any N-term;Acetyl:2H(3)@K	0;16	27	QE	0.295345	ETNLDSLPLVDTHSKR	0.992113	0.993796	0.929049	0.827999	10	0.991208	0.994675	0	LR	TRUE	trypsin	1	24	4	0.142857	0.04
High	[R].nAVLEADFAkR.[G]	HCD	3.18	1.3e-05	4.6e-05	1.2	0.54	1	Sequest HT (2)	2	740.414	1.79	80.848	25131	25131	Q99436	ArgAcetylD3	RNAVLEADFAKR	12	2	80.848	877	12		N-Term(ArgAcetylD3);K10(Acetyl:2H(3))	Acetyl:2H(3)@Any N-term;Acetyl:2H(3)@K	0;11	27	QE	0.298618	NAVLEADFAKR	0.893465	0.909327	0.726806	0.492671	8	0.698506	0.960378	1	RR	TRUE	trypsin	2	12	4	0.25	0.142857
High	[R].yQkSTELLIR.[K]	HCD	3.61	1.3e-05	9.1e-06	1.51	0.52	1	Sequest HT (2)	2	748.937	-2.03	81.1631	25258	25258	P68431; Q16695; Q5TEC6; Q6NXT2; P84243; Q71DI3	ArgAcetylD3	RYQKSTELLIR	11	2	81.163	878	11		N-Term(ArgAcetylD3);K3(Acetyl:2H(3))	Acetyl:2H(3)@Any N-term;Acetyl:2H(3)@K	0;4	27	QE	0.301482	YQKSTELLIR	0.963612	0.968938	0.84091	0.558349	5	0.890301	0.975873	1	RR;RR;RR;RR;RR;RR	TRUE	trypsin	3	9	2	0.181818	0.25
High	[R].kPDTIEVQQMkAQAR.[E]	HCD	6.06	1.3e-05	1.9e-05	1.37	0.5	1	Sequest HT (2)	3	678.707	-2.28	81.172	25262	25262	P35241; P15311; P26038	ArgAcetylD3	RKPDTIEVQQMKAQAR	16	3	81.172	879	16		N-Term(ArgAcetylD3);K1(Acetyl:2H(3));K11(Acetyl:2H(3))	Acetyl:2H(3)@Any N-term;Acetyl:2H(3)@K;Acetyl:2H(3)@K	0;2;12	27	QE	0.301564	KPDTIEVQQMKAQAR	0.994187	0.995364	0.938674	0.859044	13	0.994697	0.995639	1	RR;RR;RR	TRUE	trypsin	1	24	3	0.111111	0.04
High	[R].iAAEEkkkQDELkR.[I]	HCD	4.64	5e-05	0.0001	1.04	0.65	1	Sequest HT (2)	3	689.739	-0.61	81.6633	25472	25472	P56385	ArgAcetylD3	RIAAEEKKKQDELKR	15	3	81.663	880	15		N-Term(ArgAcetylD3);K6(Acetyl:2H(3));K7(Acetyl:2H(3));K8(Acetyl:2H(3));K13(Acetyl:2H(3))	Acetyl:2H(3)@Any N-term;Acetyl:2H(3)@K;Acetyl:2H(3)@K;Acetyl:2H(3)@K;Acetyl:2H(3)@K	0;7;8;9;14	27	QE	0.306027	IAAEEKKKQDELKR	0.994024	0.995241	0.937867	0.84067	7	0.987644	0.996015	1	RR	TRUE	trypsin	1	16	2	0.111111	0.0588235
High	[R].iAAEEkkkQDELkR.[I]	HCD	5.51	1.3e-05	1e-09	3.22	0.61	1	Sequest HT (2)	2	1034.11	0.19	81.7017	25488	25488	P56385	ArgAcetylD3	RIAAEEKKKQDELKR	15	2	81.702	881	15		N-Term(ArgAcetylD3);K6(Acetyl:2H(3));K7(Acetyl:2H(3));K8(Acetyl:2H(3));K13(Acetyl:2H(3))	Acetyl:2H(3)@Any N-term;Acetyl:2H(3)@K;Acetyl:2H(3)@K;Acetyl:2H(3)@K;Acetyl:2H(3)@K	0;7;8;9;14	27	QE	0.306382	IAAEEKKKQDELKR	0.972351	0.976268	0.861027	0.705058	8	0.962753	0.977195	1	RR	TRUE	trypsin	3	13	2	0.133333	0.1875
High	[R].sTLEPVEkALR.[D]	HCD	3.77	3.2e-05	8e-05	1.09	0.49	1	Sequest HT (2)	2	744.937	1.05	82.3577	25760	25760	P0DMV9; P17066; P48741	ArgAcetylD3	RSTLEPVEKALR	12	2	82.358	882	12		N-Term(ArgAcetylD3);K8(Acetyl:2H(3))	Acetyl:2H(3)@Any N-term;Acetyl:2H(3)@K	0;9	27	QE	0.312345	STLEPVEKALR	0.938397	0.947062	0.791929	0.548978	4	0.808971	0.958682	0	FR;FR;FR;FR	TRUE	trypsin	3	9	2	0.181818	0.25
High	[R].lLAIQAkkER.[E]	HCD	3.52	1.3e-05	1.3e-05	1.44	0.69	1	Sequest HT (2)	2	730.966	-0.66	82.3628	25763	25763	Q9UIG0	ArgAcetylD3	RLLAIQAKKER	11	2	82.363	883	11		N-Term(ArgAcetylD3);K7(Acetyl:2H(3));K8(Acetyl:2H(3))	Acetyl:2H(3)@Any N-term;Acetyl:2H(3)@K;Acetyl:2H(3)@K	0;8;9	27	QE	0.312391	LLAIQAKKER	0.929669	0.938043	0.774727	0.572233	4	0.317489	0.973189	1	RR	TRUE	trypsin	2	8	2	0.2	0.2
High	[R].qFHLTDDDLLR.[Y]	HCD	4.04	3.2e-05	8.4e-05	1.08	0.68	1	Sequest HT (2)	3	525.278	1.49	82.4047	25784	25784	Q04446	ArgAcetylD3	RQFHLTDDDLLR	12	3	82.405	884	12		N-Term(ArgAcetylD3)	Acetyl:2H(3)@Any N-term	0	27	QE	0.312773	QFHLTDDDLLR	0.800423	0.844596	0.640319	0.523961	8	0.570873	0.983509	1	RR	TRUE	trypsin	2	15	4	0.210526	0.117647
High	[R].lLAIQAkkER.[E]	HCD	3.43	0.0002	0.00091	0.618	0.69	1	Sequest HT (2)	3	487.646	-2.16	82.4166	25789	25789	Q9UIG0	ArgAcetylD3	RLLAIQAKKER	11	3	82.417	885	11		N-Term(ArgAcetylD3);K7(Acetyl:2H(3));K8(Acetyl:2H(3))	Acetyl:2H(3)@Any N-term;Acetyl:2H(3)@K;Acetyl:2H(3)@K	0;8;9	27	QE	0.312882	LLAIQAKKER	0.998154	0.998465	0.964723	0.92561	6	0.998891	0.996985	1	RR	TRUE	trypsin	0	14	1	0.0666667	0
High	[R].sTLEPVEkALR.[D]	HCD	4.58	5e-05	9.2e-05	1.06	0.6	1	Sequest HT (2)	3	496.96	-0.66	82.4264	25793	25793	P0DMV9; P17066; P48741	ArgAcetylD3	RSTLEPVEKALR	12	3	82.426	886	12		N-Term(ArgAcetylD3);K8(Acetyl:2H(3))	Acetyl:2H(3)@Any N-term;Acetyl:2H(3)@K	0;9	27	QE	0.312964	STLEPVEKALR	0.993292	0.99444	0.932838	0.574278	9	0.99801	0.986639	0	FR;FR;FR;FR	TRUE	trypsin	5	13	2	0.133333	0.277778
Low	[R].iPLFSR.[M]	HCD	1.1	0.12	0.84	-0.324	0	1	Sequest HT (2)	2	467.289	-0.19	84.1831	26532	26532	Q86YW0	ArgAcetylD3	RIPLFSR	7	2	84.183	887	7		N-Term(ArgAcetylD3)	Acetyl:2H(3)@Any N-term	0	27	QE	0.328936	IPLFSR	0.836856	0.876432	0.680165	0.562174	4	0.233236	0.961949	1	RR	TRUE	trypsin	0	9	3	0.25	0
High	[R].lkTLLVNNNR.[I]	HCD	2.45	3.2e-05	7.7e-05	1.1	0.44	1	Sequest HT (2)	2	715.94	1.27	84.4539	26648	26648	P09661	ArgAcetylD3	RLKTLLVNNNR	11	2	84.454	888	11		N-Term(ArgAcetylD3);K2(Acetyl:2H(3))	Acetyl:2H(3)@Any N-term;Acetyl:2H(3)@K	0;3	27	QE	0.3314	LKTLLVNNNR	0.92404	0.931947	0.763781	0.386867	4	0.706776	0.945252	1	RR	TRUE	trypsin	3	11	3	0.214286	0.214286
Medium	[R].aIADmLR.[A]	HCD	1.39	0.015	0.23	-0.057	0.09	1	Sequest HT (2)	2	503.78	-1.76	84.6141	26715	26715	Q9Y490	ArgAcetylD3	RAIADMLR	8	2	84.614	889	8		N-Term(ArgAcetylD3);M5(Oxidation)	Acetyl:2H(3)@Any N-term;Oxidation@M	0;6	27	QE	0.332855	AIADMLR	0.950607	0.954125	0.806422	0.701423	4	0.871992	0.991359	1	RR	TRUE	trypsin	0	8	2	0.2	0
High	[R].eLEIESQTEEQPTTkQAkAVEVGR.[K]	HCD	6.99	1.3e-05	1.2e-08	2.75	0.79	1	Sequest HT (2)	3	997.86	2.85	85.7624	27209	27209	Q9NYH9	ArgAcetylD3	RELEIESQTEEQPTTKQAKAVEVGR	25	3	85.762	890	25		N-Term(ArgAcetylD3);K15(Acetyl:2H(3));K18(Acetyl:2H(3))	Acetyl:2H(3)@Any N-term;Acetyl:2H(3)@K;Acetyl:2H(3)@K	0;16;19	27	QE	0.343291	ELEIESQTEEQPTTKQAKAVEVGR	0.990713	0.992621	0.922612	0.88162	16	0.982718	0.995294	1	RR	TRUE	trypsin	2	31	2	0.0606061	0.0606061
High	[R].lLEGEDAHLTQYkkEPVTTR.[Q]	HCD	6.17	1.3e-05	1.6e-08	2.7	0.71	1	Sequest HT (2)	3	873.808	0.09	85.9633	27297	27297	Q04695	ArgAcetylD3	RLLEGEDAHLTQYKKEPVTTR	21	3	85.963	891	21		N-Term(ArgAcetylD3);K13(Acetyl:2H(3));K14(Acetyl:2H(3))	Acetyl:2H(3)@Any N-term;Acetyl:2H(3)@K;Acetyl:2H(3)@K	0;14;15	27	QE	0.345118	LLEGEDAHLTQYKKEPVTTR	0.91938	0.935047	0.769287	0.704348	19	0.863884	0.99119	1	RR	TRUE	trypsin	5	31	3	0.0882353	0.138889
High	[R].lLEGEDAHLTQYkkEPVTTR.[Q]	HCD	5.94	1.3e-05	5.4e-06	1.6	0.66	1	Sequest HT (2)	4	655.608	-0.05	86.0295	27329	27329	Q04695	ArgAcetylD3	RLLEGEDAHLTQYKKEPVTTR	21	4	86.03	892	21		N-Term(ArgAcetylD3);K13(Acetyl:2H(3));K14(Acetyl:2H(3))	Acetyl:2H(3)@Any N-term;Acetyl:2H(3)@K;Acetyl:2H(3)@K	0;14;15	27	QE	0.345727	LLEGEDAHLTQYKKEPVTTR	0.969749	0.972698	0.850897	0.694128	15	0.868116	0.985275	1	RR	TRUE	trypsin	4	21	2	0.0869565	0.16
High	[R].dkEAELQcTQLDLER.[K]	HCD	4.99	1.3e-05	4.9e-09	2.92	0.63	1	Sequest HT (2)	2	1047.52	0.1	86.6097	27584	27584	O95361	ArgAcetylD3	RDKEAELQCTQLDLER	16	2	86.61	893	16		N-Term(ArgAcetylD3);K2(Acetyl:2H(3));C8(Carbamidomethyl)	Acetyl:2H(3)@Any N-term;Acetyl:2H(3)@K;Carbamidomethyl@C	0;3;9	27	QE	0.351	DKEAELQCTQLDLER	0.978436	0.980658	0.874585	0.697888	10	0.971629	0.983363	1	RR	TRUE	trypsin	6	14	0	0	0.3
High	[R].dkEAELQcTQLDLER.[K]	HCD	6.15	1.3e-05	1.8e-05	1.37	0.68	1	Sequest HT (2)	3	698.686	1.4	86.6254	27591	27591	O95361	ArgAcetylD3	RDKEAELQCTQLDLER	16	3	86.625	894	16		N-Term(ArgAcetylD3);K2(Acetyl:2H(3));C8(Carbamidomethyl)	Acetyl:2H(3)@Any N-term;Acetyl:2H(3)@K;Carbamidomethyl@C	0;3;9	27	QE	0.351136	DKEAELQCTQLDLER	0.994251	0.995233	0.937814	0.906057	12	0.997202	0.992843	1	RR	TRUE	trypsin	0	22	2	0.0833333	0
High	[R].gLFTGLTPR.[L]	HCD	2.25	0.0014	0.015	0.255	0.29	1	Sequest HT (2)	2	581.843	0.92	86.755	27651	27651	Q9Y6C9	ArgAcetylD3	RGLFTGLTPR	10	2	86.755	895	10		N-Term(ArgAcetylD3)	Acetyl:2H(3)@Any N-term	0	27	QE	0.352318	GLFTGLTPR	0.904052	0.919445	0.742723	0.70695	3	0.627248	0.946816	1	RR	TRUE	trypsin	0	8	2	0.2	0
High	[R].gLkYELISETGGSHDkR.[F]	HCD	7.12	1.3e-05	3.4e-10	3.43	0.75	1	Sequest HT (2)	3	727.725	-0.45	86.8374	27689	27689	Q96SI9; Q12906	ArgAcetylD3	RGLKYELISETGGSHDKR	18	3	86.837	896	18		N-Term(ArgAcetylD3);K3(Acetyl:2H(3));K16(Acetyl:2H(3))	Acetyl:2H(3)@Any N-term;Acetyl:2H(3)@K;Acetyl:2H(3)@K	0;4;17	27	QE	0.353064	GLKYELISETGGSHDKR	0.993197	0.994716	0.934526	0.859087	19	0.998054	0.987726	1	RR;RR	TRUE	trypsin	6	33	1	0.0294118	0.153846
High	[R].dLAQALINR.[G]	HCD	3.65	2.3e-05	7e-05	1.11	0.51	1	Sequest HT (2)	2	607.856	0.65	86.8777	27707	27707	P46087	ArgAcetylD3	RDLAQALINR	10	2	86.878	897	10		N-Term(ArgAcetylD3)	Acetyl:2H(3)@Any N-term	0	27	QE	0.353436	DLAQALINR	0.952123	0.96219	0.824378	0.68121	8	0.734672	0.976289	1	RR	TRUE	trypsin	1	15	2	0.117647	0.0625
High	[R].ePLSLINVR.[K]	HCD	3.07	0.00012	0.00043	0.752	0.55	1	Sequest HT (2)	2	621.375	1.49	86.9725	27752	27752	Q96HS1	ArgAcetylD3	REPLSLINVR	10	2	86.972	898	10		N-Term(ArgAcetylD3)	Acetyl:2H(3)@Any N-term	0	27	QE	0.354291	EPLSLINVR	0.898023	0.917989	0.740375	0.684942	5	0.580704	0.96229	1	RR	TRUE	trypsin	0	14	3	0.176471	0
High	[R].tELTAATGER.[H]	HCD	2.1	0.003	0.04	0.15	0.11	1	Sequest HT (2)	2	625.332	-1.2	87.8869	28166	28166	Q9P265	ArgAcetylD3	RTELTAATGER	11	2	87.887	899	11		N-Term(ArgAcetylD3)	Acetyl:2H(3)@Any N-term	0	27	QE	0.362609	TELTAATGER	0.84355	0.855747	0.653804	-0.678518	3	0.110485	0.880179	1	RR	TRUE	trypsin	7	3	9	0.75	0.7
High	[R].gDLPFVVPR.[M]	HCD	2.76	0.00028	0.0016	0.531	0.26	1	Sequest HT (2)	2	600.849	-0.83	87.9203	28184	28184	P35579	ArgAcetylD3	RGDLPFVVPR	10	2	87.92	900	10		N-Term(ArgAcetylD3)	Acetyl:2H(3)@Any N-term	0	27	QE	0.362909	GDLPFVVPR	0.952639	0.965722	0.832832	0.689961	7	0.923213	0.97402	1	RR	TRUE	trypsin	1	13	3	0.1875	0.0714286
High	[R].lSDkGLkAELmER.[L]	HCD	4.68	2.3e-05	5.2e-05	1.17	0.67	1	Sequest HT (2)	3	599.666	-2.98	88.6113	28493	28493	Q00839	ArgAcetylD3	RLSDKGLKAELMER	14	3	88.611	901	14		N-Term(ArgAcetylD3);K4(Acetyl:2H(3));K7(Acetyl:2H(3));M11(Oxidation)	Acetyl:2H(3)@Any N-term;Acetyl:2H(3)@K;Acetyl:2H(3)@K;Oxidation@M	0;5;8;12	27	QE	0.369191	LSDKGLKAELMER	0.991244	0.992731	0.923194	0.613762	8	0.997197	0.985829	1	RR	TRUE	trypsin	4	14	3	0.176471	0.222222
High	[R].lSDkGLkAELmER.[L]	HCD	3.2	0.00011	0.0004	0.768	0.65	1	Sequest HT (2)	2	898.996	-1.58	88.6366	28504	28504	Q00839	ArgAcetylD3	RLSDKGLKAELMER	14	2	88.637	902	14		N-Term(ArgAcetylD3);K4(Acetyl:2H(3));K7(Acetyl:2H(3));M11(Oxidation)	Acetyl:2H(3)@Any N-term;Acetyl:2H(3)@K;Acetyl:2H(3)@K;Oxidation@M	0;5;8;12	27	QE	0.369427	LSDKGLKAELMER	0.982955	0.984268	0.886928	0.90263	6	0.985511	0.985503	1	RR	TRUE	trypsin	0	12	1	0.0769231	0
High	[R].lSDkGLkAELmER.[L]	HCD	3.45	5.8e-05	0.00016	0.952	0.61	1	Sequest HT (2)	3	599.667	-0.33	89.1438	28728	28728	Q00839	ArgAcetylD3	RLSDKGLKAELMER	14	3	89.144	903	14		N-Term(ArgAcetylD3);K4(Acetyl:2H(3));K7(Acetyl:2H(3));M11(Oxidation)	Acetyl:2H(3)@Any N-term;Acetyl:2H(3)@K;Acetyl:2H(3)@K;Oxidation@M	0;5;8;12	27	QE	0.374036	LSDKGLKAELMER	0.988459	0.990411	0.911769	0.812986	7	0.988023	0.989281	1	RR	TRUE	trypsin	1	15	2	0.117647	0.0625
High	[R].lSDkGLkAELmER.[L]	HCD	2.84	0.0002	0.00085	0.629	0.59	1	Sequest HT (2)	2	898.999	0.8	89.1615	28737	28737	Q00839	ArgAcetylD3	RLSDKGLKAELMER	14	2	89.162	904	14		N-Term(ArgAcetylD3);K4(Acetyl:2H(3));K7(Acetyl:2H(3));M11(Oxidation)	Acetyl:2H(3)@Any N-term;Acetyl:2H(3)@K;Acetyl:2H(3)@K;Oxidation@M	0;5;8;12	27	QE	0.3742	LSDKGLKAELMER	0.963995	0.967141	0.836348	0.578289	9	0.984277	0.964039	1	RR	TRUE	trypsin	4	11	2	0.153846	0.266667
High	[R].kEVVVYLDDNQkPPVGEGLNR.[K]	HCD	4.59	1.3e-05	1.1e-05	1.46	0.56	1	Sequest HT (2)	3	887.482	-1.16	90.438	29298	29298	P52948	ArgAcetylD3	RKEVVVYLDDNQKPPVGEGLNR	22	3	90.438	905	22		N-Term(ArgAcetylD3);K1(Acetyl:2H(3));K12(Acetyl:2H(3))	Acetyl:2H(3)@Any N-term;Acetyl:2H(3)@K;Acetyl:2H(3)@K	0;2;13	27	QE	0.3858	KEVVVYLDDNQKPPVGEGLNR	0.960212	0.963345	0.8271	0.570355	9	0.542776	0.994931	1	RR	TRUE	trypsin	4	19	5	0.208333	0.173913
High	[R].iLSkPIEVQVGGR.[S]	HCD	4.56	5e-05	0.0001	1.04	0.71	1	Sequest HT (2)	3	548.002	0.62	90.575	29354	29354	Q7L014	ArgAcetylD3	RILSKPIEVQVGGR	14	3	90.575	906	14		N-Term(ArgAcetylD3);K4(Acetyl:2H(3))	Acetyl:2H(3)@Any N-term;Acetyl:2H(3)@K	0;5	27	QE	0.387045	ILSKPIEVQVGGR	0.984032	0.986681	0.895979	0.724537	8	0.993826	0.974019	1	RR	TRUE	trypsin	3	16	2	0.111111	0.157895
High	[R].iLSkPIEVQVGGR.[S]	HCD	2.28	0.0049	0.066	0.095	0.63	1	Sequest HT (2)	2	821.5	0.22	90.5877	29360	29360	Q7L014	ArgAcetylD3	RILSKPIEVQVGGR	14	2	90.588	907	14		N-Term(ArgAcetylD3);K4(Acetyl:2H(3))	Acetyl:2H(3)@Any N-term;Acetyl:2H(3)@K	0;5	27	QE	0.387164	ILSKPIEVQVGGR	0.913641	0.922754	0.748134	0.491249	1	0.678474	0.949026	1	RR	TRUE	trypsin	1	6	5	0.454545	0.142857
High	[R].gVVDSEDIPLNLSR.[E]	HCD	2.67	0.00022	0.001	0.597	0	1	Sequest HT (2)	2	857.959	-2.99	90.62	29372	29372	Q12931	ArgAcetylD3	RGVVDSEDIPLNLSR	15	2	90.62	908	15		N-Term(ArgAcetylD3)	Acetyl:2H(3)@Any N-term	0	27	QE	0.387455	GVVDSEDIPLNLSR	0.8984	0.9098	0.72753	0.549282	4	0.864601	0.943751	0	IR	TRUE	trypsin	0	10	7	0.411765	0
High	[R].kkLSELLR.[Y]	HCD	2.38	0.0011	0.011	0.29	0.22	1	Sequest HT (2)	2	639.416	-0.26	90.6996	29407	29407	P07900	ArgAcetylD3	RKKLSELLR	9	2	90.7	909	9		N-Term(ArgAcetylD3);K1(Acetyl:2H(3));K2(Acetyl:2H(3))	Acetyl:2H(3)@Any N-term;Acetyl:2H(3)@K;Acetyl:2H(3)@K	0;2;3	27	QE	0.388182	KKLSELLR	0.943198	0.949849	0.797528	0.045088	5	0.866312	0.950656	0	NR	TRUE	trypsin	4	7	5	0.416667	0.363636
High	[R].yIGIVkQAGLER.[M]	HCD	3.89	1.3e-05	4.2e-06	1.65	0.68	1	Sequest HT (2)	2	796.973	0.45	91.5329	29762	29762	P52597	ArgAcetylD3	RYIGIVKQAGLER	13	2	91.533	910	13		N-Term(ArgAcetylD3);K6(Acetyl:2H(3))	Acetyl:2H(3)@Any N-term;Acetyl:2H(3)@K	0;7	27	QE	0.395755	YIGIVKQAGLER	0.917314	0.927978	0.756908	0.485454	6	0.516832	0.961398	1	RR	TRUE	trypsin	3	9	3	0.25	0.25
High	[R].yIGIVkQAGLER.[M]	HCD	3.97	3.2e-05	8.3e-05	1.08	0.64	1	Sequest HT (2)	3	531.651	-0.59	91.6822	29823	29823	P52597	ArgAcetylD3	RYIGIVKQAGLER	13	3	91.682	911	13		N-Term(ArgAcetylD3);K6(Acetyl:2H(3))	Acetyl:2H(3)@Any N-term;Acetyl:2H(3)@K	0;7	27	QE	0.397109	YIGIVKQAGLER	0.990722	0.992394	0.921431	0.668259	8	0.995763	0.98952	1	RR	TRUE	trypsin	5	15	1	0.0625	0.25
High	[R].aEDGSVIDYELIDQDAR.[D]	HCD	5.48	1.3e-05	2.2e-09	3.08	0.75	1	Sequest HT (2)	2	1055.51	-0.5	93.0537	30395	30395	P07355	ArgAcetylD3	RAEDGSVIDYELIDQDAR	18	2	93.054	912	18		N-Term(ArgAcetylD3)	Acetyl:2H(3)@Any N-term	0	27	QE	0.409582	AEDGSVIDYELIDQDAR	0.99663	0.997082	0.951351	0.899874	9	0.996969	0.996726	1	RR	TRUE	trypsin	1	19	1	0.05	0.05
High	[R].aEDGSVIDYELIDQDAR.[D]	HCD	5.59	1.3e-05	1.5e-05	1.41	0.6	1	Sequest HT (2)	3	704.011	2.1	93.0881	30410	30410	P07355	ArgAcetylD3	RAEDGSVIDYELIDQDAR	18	3	93.088	913	18		N-Term(ArgAcetylD3)	Acetyl:2H(3)@Any N-term	0	27	QE	0.409891	AEDGSVIDYELIDQDAR	0.992978	0.994275	0.931844	0.878364	12	0.996687	0.992663	1	RR	TRUE	trypsin	1	21	2	0.0869565	0.0454545
High	[R].gQLEALQVDGGRLEAELR.[S]	HCD	4.34	2.3e-05	6.2e-05	1.14	0.57	1	Sequest HT (2)	3	719.058	-3.53	94.5908	31031	31031	P08729	ArgAcetylD3	RGQLEALQVDGGRLEAELR	19	3	94.591	914	19		N-Term(ArgAcetylD3)	Acetyl:2H(3)@Any N-term	0	27	QE	0.423555	GQLEALQVDGGRLEAELR	0.98355	0.985371	0.890975	0.671635	10	0.980097	0.987154	0	LR	TRUE	trypsin	1	17	6	0.26087	0.0555556
High	[R].aEDGSVIDYELIDQDAR.[D]	HCD	4.19	1.3e-05	3.6e-08	2.55	0.66	1	Sequest HT (2)	2	1055.51	-2.76	94.6301	31048	31048	P07355	ArgAcetylD3	RAEDGSVIDYELIDQDAR	18	2	94.63	915	18		N-Term(ArgAcetylD3)	Acetyl:2H(3)@Any N-term	0	27	QE	0.423909	AEDGSVIDYELIDQDAR	0.899079	0.91069	0.728898	0.711933	9	0.899911	0.950603	1	RR	TRUE	trypsin	4	18	2	0.1	0.181818
High	[R].vAEELALEQAkkESEDQkR.[L]	HCD	5.25	1.3e-05	2.9e-05	1.29	0.61	1	Sequest HT (2)	3	846.456	-2.91	95.2408	31313	31313	Q9NX63	ArgAcetylD3	RVAEELALEQAKKESEDQKR	20	3	95.241	916	20		N-Term(ArgAcetylD3);K11(Acetyl:2H(3));K12(Acetyl:2H(3));K18(Acetyl:2H(3))	Acetyl:2H(3)@Any N-term;Acetyl:2H(3)@K;Acetyl:2H(3)@K;Acetyl:2H(3)@K	0;12;13;19	27	QE	0.429464	VAEELALEQAKKESEDQKR	0.906664	0.92625	0.753973	0.691975	12	0.986042	0.876036	1	RR	TRUE	trypsin	1	23	8	0.258065	0.0416667
High	[R].lSEDYGVLkTDEGIAYR.[G]	HCD	5.27	2.3e-05	4.9e-05	1.19	0.58	1	Sequest HT (2)	3	725.709	-3.39	95.4728	31411	31411	P32119	ArgAcetylD3	RLSEDYGVLKTDEGIAYR	18	3	95.473	917	18		N-Term(ArgAcetylD3);K9(Acetyl:2H(3))	Acetyl:2H(3)@Any N-term;Acetyl:2H(3)@K	0;10	27	QE	0.431573	LSEDYGVLKTDEGIAYR	0.990863	0.992424	0.921587	0.608199	11	0.994652	0.989164	1	RR	TRUE	trypsin	7	17	2	0.105263	0.291667
High	[R].lSEDYGVLkTDEGIAYR.[G]	HCD	4.67	1.3e-05	2.4e-06	1.75	0.7	1	Sequest HT (2)	2	1088.06	-6.23	95.5616	31446	31446	P32119	ArgAcetylD3	RLSEDYGVLKTDEGIAYR	18	2	95.562	918	18		N-Term(ArgAcetylD3);K9(Acetyl:2H(3))	Acetyl:2H(3)@Any N-term;Acetyl:2H(3)@K	0;10	27	QE	0.432382	LSEDYGVLKTDEGIAYR	0.989921	0.990944	0.914256	0.885006	6	0.989758	0.990417	1	RR	TRUE	trypsin	0	16	2	0.111111	0
High	[R].kVMEAFEQAER.[K]	HCD	3.26	1.3e-05	1.3e-05	1.43	0.56	1	Sequest HT (2)	2	792.413	3.88	95.7529	31521	31521	P12694	ArgAcetylD3	RKVMEAFEQAER	12	2	95.753	919	12		N-Term(ArgAcetylD3);K1(Acetyl:2H(3))	Acetyl:2H(3)@Any N-term;Acetyl:2H(3)@K	0;2	27	QE	0.434118	KVMEAFEQAER	0.917734	0.933233	0.766051	0.71642	6	0.746975	0.952982	1	RR	TRUE	trypsin	0	12	3	0.2	0
High	[R].vAEELALEQAkkESEDQkR.[L]	HCD	6.17	1.3e-05	1.6e-05	1.39	0.59	1	Sequest HT (2)	4	635.096	0.4	96.2957	31740	31740	Q9NX63	ArgAcetylD3	RVAEELALEQAKKESEDQKR	20	4	96.296	920	20		N-Term(ArgAcetylD3);K11(Acetyl:2H(3));K12(Acetyl:2H(3));K18(Acetyl:2H(3))	Acetyl:2H(3)@Any N-term;Acetyl:2H(3)@K;Acetyl:2H(3)@K;Acetyl:2H(3)@K	0;12;13;19	27	QE	0.439055	VAEELALEQAKKESEDQKR	0.99416	0.994853	0.935379	0.69039	12	0.996679	0.99405	1	RR	TRUE	trypsin	4	21	4	0.16	0.16
High	[R].vAEELALEQAkkESEDQkR.[L]	HCD	6.16	1.3e-05	1.2e-07	2.33	0.68	1	Sequest HT (2)	3	846.457	-1.44	96.3111	31746	31746	Q9NX63	ArgAcetylD3	RVAEELALEQAKKESEDQKR	20	3	96.311	921	20		N-Term(ArgAcetylD3);K11(Acetyl:2H(3));K12(Acetyl:2H(3));K18(Acetyl:2H(3))	Acetyl:2H(3)@Any N-term;Acetyl:2H(3)@K;Acetyl:2H(3)@K;Acetyl:2H(3)@K	0;12;13;19	27	QE	0.439191	VAEELALEQAKKESEDQKR	0.992833	0.994377	0.932457	0.868462	16	0.99215	0.993171	1	RR	TRUE	trypsin	2	29	2	0.0645161	0.0645161
High	[R].lSDkGLkAELMER.[L]	HCD	4.06	1.3e-05	1.4e-07	2.29	0.63	1	Sequest HT (2)	2	891	-0.27	96.4038	31785	31785	Q00839	ArgAcetylD3	RLSDKGLKAELMER	14	2	96.404	922	14		N-Term(ArgAcetylD3);K4(Acetyl:2H(3));K7(Acetyl:2H(3))	Acetyl:2H(3)@Any N-term;Acetyl:2H(3)@K;Acetyl:2H(3)@K	0;5;8	27	QE	0.440036	LSDKGLKAELMER	0.473622	0.555102	0.374641	0.376377	7	0.00754049	0.964933	1	RR	TRUE	trypsin	6	12	3	0.2	0.333333
High	[R].lSDkGLkAELMER.[L]	HCD	4.51	1.3e-05	1.1e-05	1.47	0.65	1	Sequest HT (2)	3	594.336	-0.69	96.4331	31798	31798	Q00839	ArgAcetylD3	RLSDKGLKAELMER	14	3	96.433	923	14		N-Term(ArgAcetylD3);K4(Acetyl:2H(3));K7(Acetyl:2H(3))	Acetyl:2H(3)@Any N-term;Acetyl:2H(3)@K;Acetyl:2H(3)@K	0;5;8	27	QE	0.4403	LSDKGLKAELMER	0.985748	0.988017	0.901346	0.814949	11	0.965914	0.994598	1	RR	TRUE	trypsin	3	19	1	0.05	0.136364
Medium	[R].lSDkGLkAELmER.[L]	HCD	2.07	0.015	0.22	-0.052	0.43	1	Sequest HT (2)	2	898.997	-1.38	96.5022	31826	31826	Q00839	ArgAcetylD3	RLSDKGLKAELMER	14	2	96.502	924	14		N-Term(ArgAcetylD3);K4(Acetyl:2H(3));K7(Acetyl:2H(3));M11(Oxidation)	Acetyl:2H(3)@Any N-term;Acetyl:2H(3)@K;Acetyl:2H(3)@K;Oxidation@M	0;5;8;12	27	QE	0.440927	LSDKGLKAELMER	0.942563	0.947377	0.792553	0.582131	3	0.979514	0.977047	1	RR	TRUE	trypsin	0	8	5	0.384615	0
High	[R].lSDkGLkAELmER.[L]	HCD	3.92	5e-05	0.00011	1.03	0.64	1	Sequest HT (2)	3	599.667	-0.95	96.5299	31837	31837	Q00839	ArgAcetylD3	RLSDKGLKAELMER	14	3	96.53	925	14		N-Term(ArgAcetylD3);K4(Acetyl:2H(3));K7(Acetyl:2H(3));M11(Oxidation)	Acetyl:2H(3)@Any N-term;Acetyl:2H(3)@K;Acetyl:2H(3)@K;Oxidation@M	0;5;8;12	27	QE	0.441182	LSDKGLKAELMER	0.937188	0.947726	0.79325	0.760864	9	0.992795	0.982287	1	RR	TRUE	trypsin	2	15	2	0.117647	0.117647
High	[R].qkEFDPTITDASLSLPSR.[M]	HCD	5.79	1.3e-05	1.3e-05	1.44	0.58	1	Sequest HT (2)	3	751.065	-0.74	96.7385	31923	31923	Q05682	ArgAcetylD3	RQKEFDPTITDASLSLPSR	19	3	96.738	926	19		N-Term(ArgAcetylD3);K2(Acetyl:2H(3))	Acetyl:2H(3)@Any N-term;Acetyl:2H(3)@K	0;3	27	QE	0.443073	QKEFDPTITDASLSLPSR	0.962844	0.96878	0.840505	0.477008	13	0.981344	0.952176	0	ER	TRUE	trypsin	6	21	7	0.25	0.222222
High	[R].lSDkGLkAELMER.[L]	HCD	4.58	1.3e-05	8.1e-07	1.96	0.62	1	Sequest HT (2)	2	891	0.05	96.9318	32004	32004	Q00839	ArgAcetylD3	RLSDKGLKAELMER	14	2	96.932	927	14		N-Term(ArgAcetylD3);K4(Acetyl:2H(3));K7(Acetyl:2H(3))	Acetyl:2H(3)@Any N-term;Acetyl:2H(3)@K;Acetyl:2H(3)@K	0;5;8	27	QE	0.444836	LSDKGLKAELMER	0.97857	0.98146	0.877221	0.461538	6	0.981715	0.977255	1	RR	TRUE	trypsin	4	11	4	0.266667	0.266667
High	[R].lSDkGLkAELMER.[L]	HCD	4.3	1.3e-05	3.4e-05	1.25	0.64	1	Sequest HT (2)	3	594.336	-0.11	97.1206	32083	32083	Q00839	ArgAcetylD3	RLSDKGLKAELMER	14	3	97.121	928	14		N-Term(ArgAcetylD3);K4(Acetyl:2H(3));K7(Acetyl:2H(3))	Acetyl:2H(3)@Any N-term;Acetyl:2H(3)@K;Acetyl:2H(3)@K	0;5;8	27	QE	0.446555	LSDKGLKAELMER	0.990921	0.99236	0.921256	0.772475	10	0.978391	0.994843	1	RR	TRUE	trypsin	4	19	1	0.05	0.173913
High	[R].gkNVVHQLSVTLEDLYNGATR.[K]	HCD	5.51	1.3e-05	4.7e-05	1.19	0.65	1	Sequest HT (2)	4	640.849	-0.69	97.1739	32104	32104	P31689	ArgAcetylD3	RGKNVVHQLSVTLEDLYNGATR	22	4	97.174	929	22		N-Term(ArgAcetylD3);K2(Acetyl:2H(3))	Acetyl:2H(3)@Any N-term;Acetyl:2H(3)@K	0;3	27	QE	0.447036	GKNVVHQLSVTLEDLYNGATR	0.940115	0.949247	0.796305	0.840215	16	0.938264	0.94171	1	RR	TRUE	trypsin	2	22	2	0.0833333	0.0833333
High	[R].gkNVVHQLSVTLEDLYNGATR.[K]	HCD	6.23	1.3e-05	2.5e-06	1.75	0.74	1	Sequest HT (2)	3	854.129	-0.95	97.1936	32113	32113	P31689	ArgAcetylD3	RGKNVVHQLSVTLEDLYNGATR	22	3	97.194	930	22		N-Term(ArgAcetylD3);K2(Acetyl:2H(3))	Acetyl:2H(3)@Any N-term;Acetyl:2H(3)@K	0;3	27	QE	0.447218	GKNVVHQLSVTLEDLYNGATR	0.949965	0.958816	0.816659	0.847464	18	0.990788	0.886859	1	RR	TRUE	trypsin	3	29	2	0.0645161	0.09375
High	[R].lSDkGLkAELMER.[L]	HCD	4.05	1.3e-05	1.2e-05	1.45	0.56	1	Sequest HT (2)	3	594.336	0.05	98.3177	32579	32579	Q00839	ArgAcetylD3	RLSDKGLKAELMER	14	3	98.318	931	14		N-Term(ArgAcetylD3);K4(Acetyl:2H(3));K7(Acetyl:2H(3))	Acetyl:2H(3)@Any N-term;Acetyl:2H(3)@K;Acetyl:2H(3)@K	0;5;8	27	QE	0.457436	LSDKGLKAELMER	0.951693	0.959528	0.818262	0.713908	12	0.857223	0.984706	1	RR	TRUE	trypsin	5	19	1	0.05	0.208333
High	[R].lSDkGLkAELMER.[L]	HCD	3.18	1.3e-05	1.6e-06	1.84	0.56	1	Sequest HT (2)	2	891	-0.43	98.5266	32670	32670	Q00839	ArgAcetylD3	RLSDKGLKAELMER	14	2	98.527	932	14		N-Term(ArgAcetylD3);K4(Acetyl:2H(3));K7(Acetyl:2H(3))	Acetyl:2H(3)@Any N-term;Acetyl:2H(3)@K;Acetyl:2H(3)@K	0;5;8	27	QE	0.459336	LSDKGLKAELMER	0.904758	0.910699	0.728912	0.43234	7	0.96523	0.84193	1	RR	TRUE	trypsin	4	11	4	0.266667	0.266667
High	[R].kQYPISLVLAPTR.[E]	HCD	4.36	1.3e-05	1.2e-05	1.45	0.67	1	Sequest HT (2)	3	578.017	-0.61	99.2944	32988	32988	O15523; O00571	ArgAcetylD3	RKQYPISLVLAPTR	14	3	99.294	933	14		N-Term(ArgAcetylD3);K1(Acetyl:2H(3))	Acetyl:2H(3)@Any N-term;Acetyl:2H(3)@K	0;2	27	QE	0.466309	KQYPISLVLAPTR	0.992949	0.994337	0.932217	0.963075	12	0.989548	0.996258	1	RR;RR	TRUE	trypsin	0	22	1	0.0434783	0
High	[R].kQYPISLVLAPTR.[E]	HCD	3.77	1.3e-05	1.7e-05	1.39	0.62	1	Sequest HT (2)	2	866.523	-0.07	99.3144	32997	32997	O15523; O00571	ArgAcetylD3	RKQYPISLVLAPTR	14	2	99.314	934	14		N-Term(ArgAcetylD3);K1(Acetyl:2H(3))	Acetyl:2H(3)@Any N-term;Acetyl:2H(3)@K	0;2	27	QE	0.466491	KQYPISLVLAPTR	0.912626	0.92621	0.753906	0.697772	6	0.709355	0.941587	1	RR;RR	TRUE	trypsin	2	12	2	0.142857	0.142857
High	[R].fSDQFPLPLkER.[L]	HCD	3.66	0.00013	0.00055	0.708	0.45	1	Sequest HT (2)	2	861.974	-2.72	100.64	33543	33543	Q92973	ArgAcetylD3	RFSDQFPLPLKER	13	2	100.64	935	13		N-Term(ArgAcetylD3);K10(Acetyl:2H(3))	Acetyl:2H(3)@Any N-term;Acetyl:2H(3)@K	0;11	27	QE	0.478545	FSDQFPLPLKER	0.962587	0.968087	0.838736	0.459292	5	0.985264	0.941903	1	RR	TRUE	trypsin	4	10	3	0.230769	0.285714
High	[R].fSDQFPLPLkER.[L]	HCD	3.51	0.00022	0.0012	0.579	0.5	1	Sequest HT (2)	2	861.981	5.71	100.665	33553	33553	Q92973	ArgAcetylD3	RFSDQFPLPLKER	13	2	100.665	936	13		N-Term(ArgAcetylD3);K10(Acetyl:2H(3))	Acetyl:2H(3)@Any N-term;Acetyl:2H(3)@K	0;11	27	QE	0.478773	FSDQFPLPLKER	0.781764	0.814393	0.60586	0.313124	7	0.838828	0.701935	1	RR	TRUE	trypsin	5	10	3	0.230769	0.333333
High	[R].fSDQFPLPLkER.[L]	HCD	3.68	5.8e-05	0.00021	0.89	0.44	1	Sequest HT (2)	3	574.986	-0.14	100.71	33572	33572	Q92973	ArgAcetylD3	RFSDQFPLPLKER	13	3	100.71	937	13		N-Term(ArgAcetylD3);K10(Acetyl:2H(3))	Acetyl:2H(3)@Any N-term;Acetyl:2H(3)@K	0;11	27	QE	0.479182	FSDQFPLPLKER	0.995635	0.996125	0.943938	0.751954	4	0.999006	0.999159	1	RR	TRUE	trypsin	0	12	4	0.25	0
High	[R].vAkEYETVMkGLDR.[N]	HCD	4.38	5.5e-05	0.00014	0.969	0.45	1	Sequest HT (2)	3	644.02	1.49	100.775	33598	33598	Q12996	ArgAcetylD3	RVAKEYETVMKGLDR	15	3	100.775	938	15		N-Term(ArgAcetylD3);K3(Acetyl:2H(3));K10(Acetyl:2H(3))	Acetyl:2H(3)@Any N-term;Acetyl:2H(3)@K;Acetyl:2H(3)@K	0;4;11	27	QE	0.479773	VAKEYETVMKGLDR	0.967115	0.973305	0.852572	0.877649	11	0.990406	0.959442	1	RR	TRUE	trypsin	1	22	2	0.0833333	0.0434783
High	[R].fDEILEASDGImVAR.[G]	HCD	3.69	2.3e-05	4.8e-05	1.19	0.67	1	Sequest HT (2)	3	628.319	0.75	102.245	34215	34215	P14618	ArgAcetylD3	RFDEILEASDGIMVAR	16	3	102.245	939	16		N-Term(ArgAcetylD3);M12(Oxidation)	Acetyl:2H(3)@Any N-term;Oxidation@M	0;13	27	QE	0.493136	FDEILEASDGIMVAR	0.927428	0.939674	0.777743	0.429842	9	0.955142	0.722692	1	RR	TRUE	trypsin	5	16	5	0.238095	0.238095
High	[R].iIcSAGLSLLAEER.[Q]	HCD	3.25	0.00023	0.0012	0.577	0.46	1	Sequest HT (2)	3	578.319	-1.24	102.596	34362	34362	Q9BV86	ArgAcetylD3	RIICSAGLSLLAEER	15	3	102.596	940	15		N-Term(ArgAcetylD3);C3(Carbamidomethyl)	Acetyl:2H(3)@Any N-term;Carbamidomethyl@C	0;4	27	QE	0.496327	IICSAGLSLLAEER	0.812052	0.841922	0.637151	0.584416	7	0.978341	0.772645	1	RR	TRUE	trypsin	0	15	9	0.375	0
High	[R].dLEkVLTGEEkALRPGDPGFcAR.[A]	HCD	2.26	3.2e-05	7.7e-05	1.09	0.45	1	Sequest HT (2)	3	950.503	0.4	104.229	35047	35047	Q96ST2	ArgAcetylD3	RDLEKVLTGEEKALRPGDPGFCAR	24	3	104.229	941	24		N-Term(ArgAcetylD3);K4(Acetyl:2H(3));K11(Acetyl:2H(3));C21(Carbamidomethyl)	Acetyl:2H(3)@Any N-term;Acetyl:2H(3)@K;Acetyl:2H(3)@K;Carbamidomethyl@C	0;5;12;22	27	QE	0.511173	DLEKVLTGEEKALRPGDPGFCAR	0.997865	0.997789	0.95766	0.763189	10	0.999033	0.998551	1	RR	TRUE	trypsin	5	13	0	0	0.277778
High	[R].dLEkVLTGEEkALRPGDPGFcAR.[A]	HCD	4.57	1.3e-05	7e-07	1.99	0.6	1	Sequest HT (2)	4	713.128	-0.49	104.231	35048	35048	Q96ST2	ArgAcetylD3	RDLEKVLTGEEKALRPGDPGFCAR	24	4	104.232	942	24		N-Term(ArgAcetylD3);K4(Acetyl:2H(3));K11(Acetyl:2H(3));C21(Carbamidomethyl)	Acetyl:2H(3)@Any N-term;Acetyl:2H(3)@K;Acetyl:2H(3)@K;Carbamidomethyl@C	0;5;12;22	27	QE	0.5112	DLEKVLTGEEKALRPGDPGFCAR	0.994042	0.99437	0.932413	0.784296	11	0.995364	0.996211	1	RR	TRUE	trypsin	2	22	4	0.153846	0.0833333
High	[R].kEIDLLLGQTDDTR.[Y]	HCD	4.16	5.8e-05	0.0002	0.908	0.61	1	Sequest HT (2)	3	621.675	0.12	104.389	35111	35111	O75643	ArgAcetylD3	RKEIDLLLGQTDDTR	15	3	104.389	943	15		N-Term(ArgAcetylD3);K1(Acetyl:2H(3))	Acetyl:2H(3)@Any N-term;Acetyl:2H(3)@K	0;2	27	QE	0.512627	KEIDLLLGQTDDTR	0.991118	0.992392	0.921422	0.952597	9	0.99855	0.980608	1	RR	TRUE	trypsin	0	18	1	0.0526316	0
High	[R].kEIDLLLGQTDDTR.[Y]	HCD	4.12	1.3e-05	2.2e-07	2.21	0.61	1	Sequest HT (2)	2	932.009	1.12	104.555	35177	35177	O75643	ArgAcetylD3	RKEIDLLLGQTDDTR	15	2	104.555	944	15		N-Term(ArgAcetylD3);K1(Acetyl:2H(3))	Acetyl:2H(3)@Any N-term;Acetyl:2H(3)@K	0;2	27	QE	0.514136	KEIDLLLGQTDDTR	0.993653	0.994449	0.932891	0.744532	9	0.994411	0.993858	1	RR	TRUE	trypsin	3	16	2	0.111111	0.157895
High	[R].fDEILEASDGImVAR.[G]	HCD	3.52	5e-05	0.0001	1.04	0.56	1	Sequest HT (2)	2	941.97	-4.08	104.86	35306	35306	P14618	ArgAcetylD3	RFDEILEASDGIMVAR	16	2	104.86	945	16		N-Term(ArgAcetylD3);M12(Oxidation)	Acetyl:2H(3)@Any N-term;Oxidation@M	0;13	27	QE	0.516909	FDEILEASDGIMVAR	0.969274	0.973814	0.853989	0.570909	11	0.965378	0.977016	1	RR	TRUE	trypsin	3	15	4	0.210526	0.166667
High	[R].fDEILEASDGImVAR.[G]	HCD	4.6	1.3e-05	1.3e-05	1.44	0.65	1	Sequest HT (2)	3	628.317	-2.01	104.87	35311	35311	P14618	ArgAcetylD3	RFDEILEASDGIMVAR	16	3	104.87	946	16		N-Term(ArgAcetylD3);M12(Oxidation)	Acetyl:2H(3)@Any N-term;Oxidation@M	0;13	27	QE	0.517	FDEILEASDGIMVAR	0.965156	0.97087	0.845964	0.664657	12	0.981415	0.85868	1	RR	TRUE	trypsin	4	19	2	0.0952381	0.173913
High	[R].kEIDLLLGQTDDTR.[Y]	HCD	3.57	0.00018	0.00075	0.652	0.5	1	Sequest HT (2)	3	621.673	-1.82	104.92	35331	35331	O75643	ArgAcetylD3	RKEIDLLLGQTDDTR	15	3	104.92	947	15		N-Term(ArgAcetylD3);K1(Acetyl:2H(3))	Acetyl:2H(3)@Any N-term;Acetyl:2H(3)@K	0;2	27	QE	0.517455	KEIDLLLGQTDDTR	0.988029	0.989806	0.909021	0.845728	8	0.997969	0.981044	1	RR	TRUE	trypsin	0	16	3	0.157895	0
High	[R].fDEILEASDGIMVAR.[G]	HCD	3.59	1.3e-05	1.9e-05	1.37	0.67	1	Sequest HT (2)	2	933.975	-1.4	105.062	35387	35387	P14618	ArgAcetylD3	RFDEILEASDGIMVAR	16	2	105.062	948	16		N-Term(ArgAcetylD3)	Acetyl:2H(3)@Any N-term	0	27	QE	0.518745	FDEILEASDGIMVAR	0.673799	0.71021	0.5028	0.516171	8	0.677205	0.789701	1	RR	TRUE	trypsin	3	16	6	0.272727	0.157895
High	[R].fDEILEASDGImVAR.[G]	HCD	2.37	8.3e-05	0.0003	0.821	0.46	1	Sequest HT (2)	2	941.975	1.58	105.397	35522	35522	P14618	ArgAcetylD3	RFDEILEASDGIMVAR	16	2	105.397	949	16		N-Term(ArgAcetylD3);M12(Oxidation)	Acetyl:2H(3)@Any N-term;Oxidation@M	0;13	27	QE	0.521791	FDEILEASDGIMVAR	0.967149	0.971255	0.846989	0.565351	7	0.963216	0.978593	1	RR	TRUE	trypsin	1	13	6	0.315789	0.0714286
High	[R].fDEILEASDGImVAR.[G]	HCD	5.29	1.3e-05	8.1e-06	1.53	0.67	1	Sequest HT (2)	3	628.319	0.74	105.41	35527	35527	P14618	ArgAcetylD3	RFDEILEASDGIMVAR	16	3	105.41	950	16		N-Term(ArgAcetylD3);M12(Oxidation)	Acetyl:2H(3)@Any N-term;Oxidation@M	0;13	27	QE	0.521909	FDEILEASDGIMVAR	0.996743	0.997214	0.952467	0.791859	12	0.998664	0.984532	1	RR	TRUE	trypsin	4	20	1	0.047619	0.166667
Low	[R].kEIDLLLGQTDDTR.[Y]	HCD	1.31	0.48	1	-0.648	0.11	1	Sequest HT (2)	3	621.673	-2.1	105.44	35539	35539	O75643	ArgAcetylD3	RKEIDLLLGQTDDTR	15	3	105.44	951	15		N-Term(ArgAcetylD3);K1(Acetyl:2H(3))	Acetyl:2H(3)@Any N-term;Acetyl:2H(3)@K	0;2	27	QE	0.522182	KEIDLLLGQTDDTR	0.531697	0.569441	0.385681	0.0396445	4	0.716013	0.209632	1	RR	TRUE	trypsin	1	6	13	0.684211	0.142857
High	[R].kEIDLLLGQTDDTR.[Y]	HCD	2.63	0.00055	0.0046	0.387	0.4	1	Sequest HT (2)	3	621.674	-0.8	106.023	35780	35780	O75643	ArgAcetylD3	RKEIDLLLGQTDDTR	15	3	106.023	952	15		N-Term(ArgAcetylD3);K1(Acetyl:2H(3))	Acetyl:2H(3)@Any N-term;Acetyl:2H(3)@K	0;2	27	QE	0.527482	KEIDLLLGQTDDTR	0.8371	0.859219	0.6581	0.661996	7	0.995458	0.780588	1	RR	TRUE	trypsin	1	14	5	0.263158	0.0666667
High	[R].lLEDGEDFNLGDALDSSNSmQTIQkTTTR.[I]	HCD	7.46	1.3e-05	1.1e-08	2.77	0.84	1	Sequest HT (2)	3	1154.56	-1.58	108.595	36805	36805	P05783	ArgAcetylD3	RLLEDGEDFNLGDALDSSNSMQTIQKTTTR	30	3	108.595	953	30		N-Term(ArgAcetylD3);M20(Oxidation);K25(Acetyl:2H(3))	Acetyl:2H(3)@Any N-term;Oxidation@M;Acetyl:2H(3)@K	0;21;26	27	QE	0.550864	LLEDGEDFNLGDALDSSNSMQTIQKTTTR	0.99232	0.993634	0.92813	0.888387	18	0.988723	0.994492	1	RR	TRUE	trypsin	2	31	2	0.0606061	0.0606061
High	[R].qkESGSkWkVFIDQINR.[S]	HCD	5.05	1.3e-05	2.4e-05	1.32	0.49	1	Sequest HT (2)	3	800.444	-1.39	109.998	37388	37388	Q8NBL1	ArgAcetylD3	RQKESGSKWKVFIDQINR	18	3	109.998	954	18		N-Term(ArgAcetylD3);K2(Acetyl:2H(3));K7(Acetyl:2H(3));K9(Acetyl:2H(3))	Acetyl:2H(3)@Any N-term;Acetyl:2H(3)@K;Acetyl:2H(3)@K;Acetyl:2H(3)@K	0;3;8;10	27	QE	0.563618	QKESGSKWKVFIDQINR	0.942857	0.952071	0.802101	0.603409	14	0.904453	0.95077	0	GR	TRUE	trypsin	5	18	3	0.142857	0.217391
High	[R].dLPLLLFR.[T]	HCD	3.12	0.00015	0.00061	0.69	0.6	1	Sequest HT (2)	2	594.37	-0.25	111.016	37793	37793	O43175	ArgAcetylD3	RDLPLLLFR	9	2	111.016	955	9		N-Term(ArgAcetylD3)	Acetyl:2H(3)@Any N-term	0	27	QE	0.572873	DLPLLLFR	0.959326	0.968521	0.839841	0.714443	6	0.896906	0.972932	1	RR	TRUE	trypsin	0	14	3	0.176471	0
High	[R].gPFELEAFYSDPQGVPYPEAkIGR.[F]	HCD	4.01	6.5e-05	0.00023	0.873	0.59	1	Sequest HT (2)	3	971.834	6.62	111.209	37870	37870	Q92598	ArgAcetylD3	RGPFELEAFYSDPQGVPYPEAKIGR	25	3	111.209	956	25		N-Term(ArgAcetylD3);K21(Acetyl:2H(3))	Acetyl:2H(3)@Any N-term;Acetyl:2H(3)@K	0;22	27	QE	0.574627	GPFELEAFYSDPQGVPYPEAKIGR	0.965691	0.966519	0.834799	0.497674	7	0.884806	0.998656	1	RR	TRUE	trypsin	1	18	11	0.37931	0.0526316
High	[R].lLEDGEDFNLGDALDSSNSMQTIQkTTTR.[I]	HCD	7.2	1.3e-05	1.2e-09	3.2	0.82	1	Sequest HT (2)	3	1149.23	-0.61	113.117	38646	38646	P05783	ArgAcetylD3	RLLEDGEDFNLGDALDSSNSMQTIQKTTTR	30	3	113.116	957	30		N-Term(ArgAcetylD3);K25(Acetyl:2H(3))	Acetyl:2H(3)@Any N-term;Acetyl:2H(3)@K	0;26	27	QE	0.591964	LLEDGEDFNLGDALDSSNSMQTIQKTTTR	0.979161	0.983141	0.882936	0.866663	18	0.982446	0.978896	1	RR	TRUE	trypsin	2	32	3	0.0857143	0.0588235
High	[R].lLEDGEDFNLGDALDSSNSMQTIQkTTTR.[I]	HCD	8.29	1.3e-05	4.1e-09	2.96	0.82	1	Sequest HT (2)	3	1149.23	-0.29	114.127	39053	39053	P05783	ArgAcetylD3	RLLEDGEDFNLGDALDSSNSMQTIQKTTTR	30	3	114.127	958	30		N-Term(ArgAcetylD3);K25(Acetyl:2H(3))	Acetyl:2H(3)@Any N-term;Acetyl:2H(3)@K	0;26	27	QE	0.601155	LLEDGEDFNLGDALDSSNSMQTIQKTTTR	0.996556	0.997205	0.952387	0.873383	21	0.994687	0.998873	1	RR	TRUE	trypsin	4	34	1	0.0285714	0.105263
High	[R].lTSSVScALDEAAAALTR.[M]	HCD	6.88	1.3e-05	4.9e-07	2.05	0.65	1	Sequest HT (2)	3	679.688	0.53	118.548	40886	40886	O75179; Q8IWZ3	ArgAcetylD3	RLTSSVSCALDEAAAALTR	19	3	118.548	959	19		N-Term(ArgAcetylD3);C7(Carbamidomethyl)	Acetyl:2H(3)@Any N-term;Carbamidomethyl@C	0;8	27	QE	0.641345	LTSSVSCALDEAAAALTR	0.986911	0.989425	0.907336	0.798637	16	0.973537	0.992244	1	RR;RR	TRUE	trypsin	5	25	1	0.0384615	0.166667
High	[R].lTSSVScALDEAAAALTR.[M]	HCD	5.26	1.3e-05	7.3e-10	3.28	0.6	1	Sequest HT (2)	2	1019.03	0.63	118.64	40925	40925	O75179; Q8IWZ3	ArgAcetylD3	RLTSSVSCALDEAAAALTR	19	2	118.64	960	19		N-Term(ArgAcetylD3);C7(Carbamidomethyl)	Acetyl:2H(3)@Any N-term;Carbamidomethyl@C	0;8	27	QE	0.642182	LTSSVSCALDEAAAALTR	0.959018	0.961555	0.822901	0.606534	4	0.945911	0.967589	1	RR;RR	TRUE	trypsin	5	6	1	0.142857	0.454545
High	[R].lWQQETLQELER.[L]	HCD	2.14	0.0035	0.047	0.131	0.29	1	Sequest HT (2)	2	887.468	-2.2	118.683	40942	40942	A6NEF3	ArgAcetylD3	RLWQQETLQELER	13	2	118.683	961	13		N-Term(ArgAcetylD3)	Acetyl:2H(3)@Any N-term	0	27	QE	0.642573	LWQQETLQELER	0.351171	0.43585	0.287104	-0.451693	5	0.0826898	0.697084	0	ER	TRUE	trypsin	6	5	10	0.666667	0.545455
High	[R].gAkPEGkAIIDEFEQkLR.[A]	HCD	5.64	1.3e-05	8.8e-06	1.51	0.63	1	Sequest HT (2)	3	789.114	0.71	120.606	41703	41703	Q15021	ArgAcetylD3	RGAKPEGKAIIDEFEQKLR	19	3	120.606	962	19		N-Term(ArgAcetylD3);K3(Acetyl:2H(3));K7(Acetyl:2H(3));K16(Acetyl:2H(3))	Acetyl:2H(3)@Any N-term;Acetyl:2H(3)@K;Acetyl:2H(3)@K;Acetyl:2H(3)@K	0;4;8;17	27	QE	0.660055	GAKPEGKAIIDEFEQKLR	0.98768	0.990133	0.910497	0.846357	12	0.979325	0.996345	1	RR	TRUE	trypsin	2	23	2	0.08	0.08
High	[R].vLQALEGLkMVEkDQDGGR.[K]	HCD	4.9	1.3e-05	7e-06	1.55	0.64	1	Sequest HT (2)	3	793.102	2.36	120.939	41838	41838	P39019	ArgAcetylD3	RVLQALEGLKMVEKDQDGGR	20	3	120.939	963	20		N-Term(ArgAcetylD3);K9(Acetyl:2H(3));K13(Acetyl:2H(3))	Acetyl:2H(3)@Any N-term;Acetyl:2H(3)@K;Acetyl:2H(3)@K	0;10;14	27	QE	0.663082	VLQALEGLKMVEKDQDGGR	0.985142	0.988171	0.901984	0.789897	12	0.982161	0.985689	1	RR	TRUE	trypsin	0	24	6	0.2	0
High	[R].vDIDEFDENkFVDEQEEAAAAAAEPGPDPSEVDGLLR.[Q]	HCD	5.13	1.3e-05	1.8e-07	2.24	0.74	1	Sequest HT (2)	4	1059.26	3.36	123.393	42785	42785	Q9BPX5	ArgAcetylD3	RVDIDEFDENKFVDEQEEAAAAAAEPGPDPSEVDGLLR	38	4	123.393	964	38		N-Term(ArgAcetylD3);K10(Acetyl:2H(3))	Acetyl:2H(3)@Any N-term;Acetyl:2H(3)@K	0;11	27	QE	0.685391	VDIDEFDENKFVDEQEEAAAAAAEPGPDPSEVDGLLR	0.98993	0.990678	0.913005	0.799489	15	0.983087	0.992883	1	RR	TRUE	trypsin	1	30	7	0.189189	0.0322581
High	[R].iDEINkELNQVMEQLGDAR.[I]	HCD	6.31	1.3e-05	2e-07	2.22	0.65	1	Sequest HT (2)	3	821.094	1.88	124.474	43203	43203	Q14683	ArgAcetylD3	RIDEINKELNQVMEQLGDAR	20	3	124.474	965	20		N-Term(ArgAcetylD3);K6(Acetyl:2H(3))	Acetyl:2H(3)@Any N-term;Acetyl:2H(3)@K	0;7	27	QE	0.695218	IDEINKELNQVMEQLGDAR	0.972184	0.978136	0.866633	0.870786	15	0.916029	0.997916	1	RR	TRUE	trypsin	2	27	2	0.0689655	0.0689655
High	[R].gEDHPAVmR.[L]	HCD	1.24	0.0094	0.14	0.008	0.29	1	Sequest HT (2)	3	410.203	0.47	39.7636	7254	7254	Q9BW71	ArgAcetylD3	RGEDHPAVMR	10	3	39.764	966	10		N-Term(ArgAcetylD3);M8(Oxidation)	Acetyl:2H(3)@Any N-term;Oxidation@M	0;9	27	QE	-0.0748727	GEDHPAVMR	0.959535	0.961817	0.823509	0.520463	4	0.962637	0.955364	1	RR	TRUE	trypsin	1	7	4	0.363636	0.125
High	[R].vHEGSQkSQPR.[H]	HCD	5.04	1.3e-05	3.7e-06	1.68	0.64	1	Sequest HT (2)	3	500.271	0.09	40.0632	7365	7365	O60343	ArgAcetylD3	RVHEGSQKSQPR	12	3	40.063	967	12		N-Term(ArgAcetylD3);K7(Acetyl:2H(3))	Acetyl:2H(3)@Any N-term;Acetyl:2H(3)@K	0;8	27	QE	-0.0721545	VHEGSQKSQPR	0.97531	0.982018	0.879089	0.803735	13	0.954284	0.983371	1	RR	TRUE	trypsin	3	21	1	0.0454545	0.125
High	[R].dHRPPcAQEAPR.[N]	HCD	1.69	0.00035	0.0022	0.483	0.45	1	Sequest HT (2)	4	409.456	0.71	40.681	7594	7594	Q13501	ArgAcetylD3	RDHRPPCAQEAPR	13	4	40.681	968	13		N-Term(ArgAcetylD3);C6(Carbamidomethyl)	Acetyl:2H(3)@Any N-term;Carbamidomethyl@C	0;7	27	QE	-0.0665364	DHRPPCAQEAPR	0.666926	0.703852	0.497076	0.19784	2	0.590869	0.69244	1	RR	TRUE	trypsin	0	5	10	0.666667	0
High	[R].dHRPPcAQEAPR.[N]	HCD	0.88	0.0046	0.063	0.101	0.09	1	Sequest HT (2)	3	545.605	-0.18	40.8866	7667	7667	Q13501	ArgAcetylD3	RDHRPPCAQEAPR	13	3	40.887	969	13		N-Term(ArgAcetylD3);C6(Carbamidomethyl)	Acetyl:2H(3)@Any N-term;Carbamidomethyl@C	0;7	27	QE	-0.0646636	DHRPPCAQEAPR	0.42155	0.48006	0.318771	0.0729483	1	0.900765	0.342095	1	RR	TRUE	trypsin	0	5	12	0.705882	0
High	[R].dHRPPcAQEAPR.[N]	HCD	2.02	0.001	0.01	0.297	0.45	1	Sequest HT (2)	4	409.456	1.09	41.5328	7896	7896	Q13501	ArgAcetylD3	RDHRPPCAQEAPR	13	4	41.533	970	13		N-Term(ArgAcetylD3);C6(Carbamidomethyl)	Acetyl:2H(3)@Any N-term;Carbamidomethyl@C	0;7	27	QE	-0.0587909	DHRPPCAQEAPR	0.756987	0.789821	0.579653	0.467434	5	0.932126	0.699254	1	RR	TRUE	trypsin	0	8	7	0.466667	0
Low	[R].lSDQRSkER.[S]	HCD	0.92	0.4	1	-0.579	0.09	1	Sequest HT (2)	3	455.585	-7.75	42.3662	8193	8193	P08195	ArgAcetylD3	RLSDQRSKER	10	3	42.366	971	10		N-Term(ArgAcetylD3);K7(Acetyl:2H(3))	Acetyl:2H(3)@Any N-term;Acetyl:2H(3)@K	0;8	27	QE	-0.0512182	LSDQRSKER	0.380914	0.432972	0.28507	-0.148263	0	NA	0.415518	1	RR	TRUE	trypsin	1	2	9	0.818182	0.333333
High	[R].skTkEAR.[K]	HCD	1.19	0.0076	0.11	0.039	0.22	1	Sequest HT (2)	2	555.832	0.02	42.874	8377	8377	P84098	ArgAcetylD3	RSKTKEAR	8	2	42.874	972	8		N-Term(ArgAcetylD3);K2(Acetyl:2H(3));K4(Acetyl:2H(3))	Acetyl:2H(3)@Any N-term;Acetyl:2H(3)@K;Acetyl:2H(3)@K	0;3;5	27	QE	-0.0466	SKTKEAR	0.955014	0.957779	0.814348	0.519431	2	0.903582	0.9633	1	RR	TRUE	trypsin	0	6	4	0.4	0
Medium	[R].lSDQRSkER.[S]	HCD	1.84	0.014	0.22	-0.05	0.47	1	Sequest HT (2)	3	455.589	0.37	42.8962	8385	8385	P08195	ArgAcetylD3	RLSDQRSKER	10	3	42.896	973	10		N-Term(ArgAcetylD3);K7(Acetyl:2H(3))	Acetyl:2H(3)@Any N-term;Acetyl:2H(3)@K	0;8	27	QE	-0.0464	LSDQRSKER	0.989923	0.989774	0.908881	0.552124	2	0.990688	0.989848	1	RR	TRUE	trypsin	0	7	4	0.363636	0
Medium	[R].gASQAGmTGYGRPR.[Q]	HCD	0.94	0.046	0.58	-0.199	0.13	1	Sequest HT (2)	3	542.606	1.86	43.1364	8475	8475	Q01995	ArgAcetylD3	RGASQAGMTGYGRPR	15	3	43.136	974	15		N-Term(ArgAcetylD3);M7(Oxidation)	Acetyl:2H(3)@Any N-term;Oxidation@M	0;8	27	QE	-0.0442182	GASQAGMTGYGRPR	0.497507	0.544504	0.366564	-0.149385	1	-0.0823755	0.906277	0	NR	TRUE	trypsin	2	3	13	0.8125	0.4
High	[R].gEDHPAVMR.[L]	HCD	3.19	0.00018	0.00073	0.657	0.6	1	Sequest HT (2)	3	404.871	-0.52	44.038	8815	8815	Q9BW71	ArgAcetylD3	RGEDHPAVMR	10	3	44.038	975	10		N-Term(ArgAcetylD3)	Acetyl:2H(3)@Any N-term	0	27	QE	-0.0360182	GEDHPAVMR	0.981958	0.985159	0.890183	0.502188	4	0.992694	0.982639	1	RR	TRUE	trypsin	3	9	3	0.25	0.25
High	[R].aEQIQAR.[T]	HCD	1.29	0.00057	0.0048	0.383	0.28	1	Sequest HT (2)	2	508.788	0.27	44.417	8958	8958	Q9Y315	ArgAcetylD3	RAEQIQAR	8	2	44.417	976	8		N-Term(ArgAcetylD3)	Acetyl:2H(3)@Any N-term	0	27	QE	-0.0325727	AEQIQAR	0.884973	0.900305	0.713313	0.328407	3	0.464455	0.936935	1	RR	TRUE	trypsin	1	9	4	0.307692	0.1
Low	[R].lNDFASTVR.[I]	HCD	0.99	0.6	1	-0.79	0.11	1	Sequest HT (2)	3	408.556	-2.41	45.1915	9248	9248	P20674	ArgAcetylD3	RLNDFASTVR	10	3	45.191	977	10		N-Term(ArgAcetylD3)	Acetyl:2H(3)@Any N-term	0	27	QE	-0.0255364	LNDFASTVR	0.190805	0.254566	0.163865	-0.484299	1	-0.0825368	0.356514	1	RR	TRUE	trypsin	2	2	11	0.846154	0.5
Low	[R].lSDQRSkER.[S]	HCD	1.25	0.068	0.7	-0.247	0.18	1	Sequest HT (2)	3	455.589	-0.13	45.3024	9287	9287	P08195	ArgAcetylD3	RLSDQRSKER	10	3	45.302	978	10		N-Term(ArgAcetylD3);K7(Acetyl:2H(3))	Acetyl:2H(3)@Any N-term;Acetyl:2H(3)@K	0;8	27	QE	-0.0245273	LSDQRSKER	0.876947	0.887977	0.695779	0.289833	1	0.9902	0.851032	1	RR	TRUE	trypsin	0	4	7	0.636364	0
High	[R].vIAANNR.[I]	HCD	2.3	0.00035	0.0022	0.481	0.13	1	Sequest HT (2)	2	479.785	0.02	45.4238	9332	9332	P29218	ArgAcetylD3	RVIAANNR	8	2	45.424	979	8		N-Term(ArgAcetylD3)	Acetyl:2H(3)@Any N-term	0	27	QE	-0.0234182	VIAANNR	0.827852	0.867518	0.668572	0.567871	6	0.283568	0.921769	1	RR	TRUE	trypsin	1	9	2	0.181818	0.1
High	[R].gNDAVMAR.[G]	HCD	1.9	0.00034	0.0021	0.489	0.37	1	Sequest HT (2)	2	517.766	-0.06	45.924	9525	9525	P21399	ArgAcetylD3	RGNDAVMAR	9	2	45.924	980	9		N-Term(ArgAcetylD3)	Acetyl:2H(3)@Any N-term	0	27	QE	-0.0188727	GNDAVMAR	0.919012	0.935829	0.770694	0.734054	5	0.89752	0.949078	1	RR	TRUE	trypsin	0	11	2	0.153846	0
High	[R].gNDAVMTR.[G]	HCD	2.05	0.0098	0.14	0.002	0.43	1	Sequest HT (2)	2	532.771	0.46	45.9918	9553	9553	P48200	ArgAcetylD3	RGNDAVMTR	9	2	45.992	981	9		N-Term(ArgAcetylD3)	Acetyl:2H(3)@Any N-term	0	27	QE	-0.0182545	GNDAVMTR	0.870484	0.874876	0.678115	0.059934	2	0.32169	0.961792	1	RR	TRUE	trypsin	1	6	7	0.538462	0.142857
High	[R].aDkkPAR.[G]	HCD	2.42	0.00028	0.0015	0.536	0.45	1	Sequest HT (2)	2	538.83	0.5	46.3009	9669	9669	Q92522	ArgAcetylD3	RADKKPAR	8	2	46.301	982	8		N-Term(ArgAcetylD3);K3(Acetyl:2H(3));K4(Acetyl:2H(3))	Acetyl:2H(3)@Any N-term;Acetyl:2H(3)@K;Acetyl:2H(3)@K	0;4;5	27	QE	-0.0154455	ADKKPAR	0.93613	0.949805	0.797437	0.628353	4	0.930679	0.942177	1	RR	TRUE	trypsin	0	8	3	0.272727	0
High	[R].dYDDmSPR.[G]	HCD	2.22	0.0014	0.015	0.255	0.62	1	Sequest HT (2)	2	608.261	0.38	46.8158	9870	9870	P61978	ArgAcetylD3	RDYDDMSPR	9	2	46.816	983	9		N-Term(ArgAcetylD3);M5(Oxidation)	Acetyl:2H(3)@Any N-term;Oxidation@M	0;6	27	QE	-0.0107636	DYDDMSPR	0.957318	0.965366	0.831961	0.607955	4	0.966751	0.945892	1	RR	TRUE	trypsin	1	9	3	0.25	0.1
High	[R].qGQELSAAR.[Q]	HCD	2.21	0.00022	0.0011	0.587	0.19	1	Sequest HT (2)	2	580.814	-0.14	46.9029	9904	9904	Q04323	ArgAcetylD3	RQGQELSAAR	10	2	46.903	984	10		N-Term(ArgAcetylD3)	Acetyl:2H(3)@Any N-term	0	27	QE	-0.00997273	QGQELSAAR	0.911412	0.922516	0.747741	0.540541	3	0.573924	0.956599	1	RR	TRUE	trypsin	0	7	4	0.363636	0
High	[R].aPADEGHRPLT.[-]	HCD	3.75	3.2e-05	7.9e-05	1.09	0.62	1	Sequest HT (2)	3	455.575	0.11	47.0577	9966	9966	P0DJ93	ArgAcetylD3	RAPADEGHRPLT	12	3	47.058	985	12		N-Term(ArgAcetylD3)	Acetyl:2H(3)@Any N-term	0	27	QE	-0.00856364	APADEGHRPLT	0.979247	0.983503	0.884205	0.760747	8	0.980286	0.97748	1	RR	TRUE	trypsin	3	16	1	0.0588235	0.157895
Medium	[R].nEPPPPRNELR.[E]	HCD	1.5	0.026	0.39	-0.126	0.27	1	Sequest HT (2)	3	507.28	5.57	47.3545	10078	10078	Q9NWH9	ArgAcetylD3	RNEPPPPRNELR	12	3	47.355	986	12		N-Term(ArgAcetylD3)	Acetyl:2H(3)@Any N-term	0	27	QE	-0.00586364	NEPPPPRNELR	0.968897	0.971992	0.848974	0.402326	3	0.972725	0.969879	1	RR	TRUE	trypsin	1	7	6	0.461538	0.125
High	[R].aQkkVER.[Q]	HCD	2.38	0.0036	0.049	0.129	0.06	1	Sequest HT (2)	2	575.356	-0.69	47.6237	10181	10181	P11940; Q13310; Q9H361; P0CB38	ArgAcetylD3	RAQKKVER	8	2	47.624	987	8		N-Term(ArgAcetylD3);K3(Acetyl:2H(3));K4(Acetyl:2H(3))	Acetyl:2H(3)@Any N-term;Acetyl:2H(3)@K;Acetyl:2H(3)@K	0;4;5	27	QE	-0.00341818	AQKKVER	0.92383	0.930857	0.761875	0.200876	4	0.722846	0.936632	0	GR;GR;GR;GR	TRUE	trypsin	1	8	5	0.384615	0.111111
Medium	[R].gkSGFNSkSGQR.[G]	HCD	1.85	0.033	0.47	-0.157	0.3	1	Sequest HT (2)	3	515.281	-0.99	48.1086	10368	10368	P07910	ArgAcetylD3	RGKSGFNSKSGQR	13	3	48.109	988	13		N-Term(ArgAcetylD3);K2(Acetyl:2H(3));K8(Acetyl:2H(3))	Acetyl:2H(3)@Any N-term;Acetyl:2H(3)@K;Acetyl:2H(3)@K	0;3;9	27	QE	0.000990909	GKSGFNSKSGQR	0.7612	0.780604	0.570177	0.253528	2	0.877885	0.728872	1	RR	TRUE	trypsin	0	6	10	0.625	0
High	[R].nQkPEVR.[K]	HCD	2	0.0079	0.11	0.033	0.32	1	Sequest HT (2)	2	558.824	1.57	48.1656	10391	10391	P83731	ArgAcetylD3	RNQKPEVR	8	2	48.166	989	8		N-Term(ArgAcetylD3);K3(Acetyl:2H(3))	Acetyl:2H(3)@Any N-term;Acetyl:2H(3)@K	0;4	27	QE	0.00150909	NQKPEVR	0.967993	0.974532	0.856013	0.345922	6	0.895358	0.98229	1	KR	TRUE	trypsin	3	8	3	0.272727	0.272727
High	[R].kkkVVHR.[T]	HCD	3.27	0.00022	0.0011	0.581	0.79	1	Sequest HT (2)	3	410.944	-0.99	48.4015	10484	10484	P20290; Q96K17	ArgAcetylD3	RKKKVVHR	8	3	48.401	990	8		N-Term(ArgAcetylD3);K1(Acetyl:2H(3));K2(Acetyl:2H(3));K3(Acetyl:2H(3))	Acetyl:2H(3)@Any N-term;Acetyl:2H(3)@K;Acetyl:2H(3)@K;Acetyl:2H(3)@K	0;2;3;4	27	QE	0.00364545	KKKVVHR	0.96693	0.974493	0.855904	0.772852	6	0.746645	0.98381	1	RR;RR	TRUE	trypsin	1	12	1	0.0769231	0.0769231
High	[R].nkAEkQkR.[D]	HCD	2.35	5e-05	0.00011	1.02	0.53	1	Sequest HT (2)	2	669.406	0.56	48.455	10504	10504	P35579; P35580; P35749	ArgAcetylD3	RNKAEKQKR	9	2	48.455	991	9		N-Term(ArgAcetylD3);K2(Acetyl:2H(3));K5(Acetyl:2H(3));K7(Acetyl:2H(3))	Acetyl:2H(3)@Any N-term;Acetyl:2H(3)@K;Acetyl:2H(3)@K;Acetyl:2H(3)@K	0;3;6;8	27	QE	0.00413636	NKAEKQKR	0.907759	0.924374	0.750824	0.459494	3	0.613721	0.969125	0	SR;AR;SR	TRUE	trypsin	1	6	4	0.4	0.142857
High	[R].kkkVVHR.[T]	HCD	2.29	0.00046	0.0033	0.43	0.5	1	Sequest HT (2)	2	615.913	0.98	48.5875	10557	10557	P20290; Q96K17	ArgAcetylD3	RKKKVVHR	8	2	48.587	992	8		N-Term(ArgAcetylD3);K1(Acetyl:2H(3));K2(Acetyl:2H(3));K3(Acetyl:2H(3))	Acetyl:2H(3)@Any N-term;Acetyl:2H(3)@K;Acetyl:2H(3)@K;Acetyl:2H(3)@K	0;2;3;4	27	QE	0.00533636	KKKVVHR	0.986615	0.986627	0.895771	0.403941	4	0.851438	0.994982	1	RR;RR	TRUE	trypsin	1	7	5	0.416667	0.125
High	[R].kkkVVHR.[T]	HCD	2.53	0.00021	0.00098	0.605	0.79	1	Sequest HT (2)	3	410.944	-0.47	48.9319	10699	10699	P20290; Q96K17	ArgAcetylD3	RKKKVVHR	8	3	48.932	993	8		N-Term(ArgAcetylD3);K1(Acetyl:2H(3));K2(Acetyl:2H(3));K3(Acetyl:2H(3))	Acetyl:2H(3)@Any N-term;Acetyl:2H(3)@K;Acetyl:2H(3)@K;Acetyl:2H(3)@K	0;2;3;4	27	QE	0.00847273	KKKVVHR	0.616497	0.708971	0.501681	0.661193	7	0.0316047	0.995616	1	RR;RR	TRUE	trypsin	2	12	1	0.0769231	0.142857
High	[R].kkEANkATR.[A]	HCD	2.26	0.00013	0.00054	0.711	0.44	1	Sequest HT (2)	2	691.419	-0.13	49.0681	10760	10760	Q9H1I8	ArgAcetylD3	RKKEANKATR	10	2	49.068	994	10		N-Term(ArgAcetylD3);K1(Acetyl:2H(3));K2(Acetyl:2H(3));K6(Acetyl:2H(3))	Acetyl:2H(3)@Any N-term;Acetyl:2H(3)@K;Acetyl:2H(3)@K;Acetyl:2H(3)@K	0;2;3;7	27	QE	0.00970909	KKEANKATR	0.952029	0.958556	0.816075	0.590991	3	0.738247	0.980359	1	RR	TRUE	trypsin	0	7	4	0.363636	0
High	[R].sPRPkGDFSSR.[A]	HCD	2.24	0.0005	0.0041	0.4	0.19	1	Sequest HT (2)	3	493.936	-0.33	49.9064	11091	11091	Q9P2W9	ArgAcetylD3	RSPRPKGDFSSR	12	3	49.906	995	12		N-Term(ArgAcetylD3);K5(Acetyl:2H(3))	Acetyl:2H(3)@Any N-term;Acetyl:2H(3)@K	0;6	27	QE	0.0173273	SPRPKGDFSSR	0.843683	0.862604	0.662336	0.4463	6	0.882606	0.892746	1	RR	TRUE	trypsin	1	11	6	0.352941	0.0833333
High	[R].gAPGAEHEPSLSSR.[H]	HCD	3.5	2.3e-05	6e-05	1.14	0.59	1	Sequest HT (2)	3	532.604	0.05	50.5257	11349	11349	Q96GS4	ArgAcetylD3	RGAPGAEHEPSLSSR	15	3	50.526	996	15		N-Term(ArgAcetylD3)	Acetyl:2H(3)@Any N-term	0	27	QE	0.0229636	GAPGAEHEPSLSSR	0.995138	0.995644	0.940555	0.68404	9	0.994021	0.995888	1	RR	TRUE	trypsin	4	16	2	0.111111	0.2
High	[R].gPAEESSSWRDSSR.[D]	HCD	2.29	0.00022	0.0011	0.582	0.3	1	Sequest HT (2)	3	584.609	-0.49	51.5775	11784	11784	Q14152	ArgAcetylD3	RGPAEESSSWRDSSR	15	3	51.578	997	15		N-Term(ArgAcetylD3)	Acetyl:2H(3)@Any N-term	0	27	QE	0.0325273	GPAEESSSWRDSSR	0.854565	0.877896	0.682106	0.631613	5	0.849325	0.853059	1	RR	TRUE	trypsin	1	12	4	0.25	0.0769231
High	[R].gAEDDRGPWR.[N]	HCD	2.64	8.3e-05	0.00029	0.832	0.43	1	Sequest HT (2)	3	453.891	-0.59	51.5901	11789	11789	Q14152	ArgAcetylD3	RGAEDDRGPWR	11	3	51.59	998	11		N-Term(ArgAcetylD3)	Acetyl:2H(3)@Any N-term	0	27	QE	0.0326364	GAEDDRGPWR	0.929044	0.937478	0.773691	0.46257	9	0.980446	0.923958	1	RR	TRUE	trypsin	2	15	5	0.25	0.117647
High	[R].gADDDRPSWR.[N]	HCD	2.43	0.00025	0.0013	0.559	0.34	1	Sequest HT (2)	3	459.223	0.28	51.9332	11933	11933	Q14152	ArgAcetylD3	RGADDDRPSWR	11	3	51.933	999	11		N-Term(ArgAcetylD3)	Acetyl:2H(3)@Any N-term	0	27	QE	0.0357545	GADDDRPSWR	0.949274	0.957487	0.813702	0.500188	6	0.969578	0.946393	1	RR	TRUE	trypsin	2	12	5	0.294118	0.142857
High	[R].lRQPkYPR.[K]	HCD	3.21	0.0027	0.034	0.165	0.5	1	Sequest HT (2)	3	435.267	-0.46	52.6484	12218	12218	P62750	ArgAcetylD3	RLRQPKYPR	9	3	52.648	1000	9		N-Term(ArgAcetylD3);K5(Acetyl:2H(3))	Acetyl:2H(3)@Any N-term;Acetyl:2H(3)@K	0;6	27	QE	0.0422545	LRQPKYPR	0.7398	0.812966	0.604297	0.360337	6	0.368682	0.844183	NA	NA	FALSE	trypsin	1	11	4	0.266667	0.0833333
High	[R].kAALSSPR.[S]	HCD	1.84	0.0017	0.019	0.228	0.29	1	Sequest HT (2)	2	538.328	0.46	52.9963	12358	12358	Q68E01	ArgAcetylD3	RKAALSSPR	9	2	52.996	1001	9		N-Term(ArgAcetylD3);K1(Acetyl:2H(3))	Acetyl:2H(3)@Any N-term;Acetyl:2H(3)@K	0;2	27	QE	0.0454182	KAALSSPR	0.859517	0.886165	0.69328	0.59934	3	0.584238	0.88674	1	RR	TRUE	trypsin	1	8	2	0.2	0.111111
High	[R].vEELQNR.[I]	HCD	1.63	0.00041	0.0028	0.45	0.32	1	Sequest HT (2)	2	544.799	1.13	53.3508	12500	12500	P22736	ArgAcetylD3	RVEELQNR	8	2	53.351	1002	8		N-Term(ArgAcetylD3)	Acetyl:2H(3)@Any N-term	0	27	QE	0.0486455	VEELQNR	0.923131	0.937146	0.773084	0.587849	5	0.722861	0.956784	1	RR	TRUE	trypsin	0	10	3	0.230769	0
High	[R].gkSGFNSkSGQR.[G]	HCD	3.26	1.3e-05	3.7e-06	1.68	0.65	1	Sequest HT (2)	2	772.418	0.12	53.4129	12526	12526	P07910	ArgAcetylD3	RGKSGFNSKSGQR	13	2	53.413	1003	13		N-Term(ArgAcetylD3);K2(Acetyl:2H(3));K8(Acetyl:2H(3))	Acetyl:2H(3)@Any N-term;Acetyl:2H(3)@K;Acetyl:2H(3)@K	0;3;9	27	QE	0.0492091	GKSGFNSKSGQR	0.820404	0.840086	0.634992	0.600901	2	0.195844	0.89029	1	RR	TRUE	trypsin	1	6	3	0.333333	0.142857
Low	[R].lkSGSGPVR.[I]	HCD	1.18	0.068	0.7	-0.248	0.36	1	Sequest HT (2)	2	573.847	0.76	54.4713	12939	12939	O75607	ArgAcetylD3	RLKSGSGPVR	10	2	54.471	1004	10		N-Term(ArgAcetylD3);K2(Acetyl:2H(3))	Acetyl:2H(3)@Any N-term;Acetyl:2H(3)@K	0;3	27	QE	0.0588273	LKSGSGPVR	0.884388	0.897455	0.709172	0.49408	1	0.764758	0.894896	0	FR	TRUE	trypsin	1	5	3	0.375	0.166667
Low	[R].tRPkEEDPATGTGDPPRkkPTR.[L]	HCD	1.36	0.072	0.72	-0.257	0.28	1	Sequest HT (2)	4	693.379	-1.1	55.2456	13244	13244	P45974	ArgAcetylD3	RTRPKEEDPATGTGDPPRKKPTR	23	4	55.246	1005	23		N-Term(ArgAcetylD3);K4(Acetyl:2H(3));K18(Acetyl:2H(3));K19(Acetyl:2H(3))	Acetyl:2H(3)@Any N-term;Acetyl:2H(3)@K;Acetyl:2H(3)@K;Acetyl:2H(3)@K	0;5;19;20	27	QE	0.0658727	TRPKEEDPATGTGDPPRKKPTR	0.953433	0.954864	0.807998	0.827991	4	0.922155	0.999529	NA	NA	FALSE	trypsin	0	6	3	0.333333	0
Medium	[R].lATVEER.[K]	HCD	1.67	0.024	0.37	-0.12	0.06	1	Sequest HT (2)	2	509.79	0.2	55.3458	13283	13283	Q12824	ArgAcetylD3	RLATVEER	8	2	55.346	1006	8		N-Term(ArgAcetylD3)	Acetyl:2H(3)@Any N-term	0	27	QE	0.0667818	LATVEER	0.9575	0.959408	0.81799	0.345922	3	0.833362	0.978481	1	RR	TRUE	trypsin	1	7	5	0.416667	0.125
High	[R].aPDQAAEIGSR.[G]	HCD	2.38	0.00011	0.0004	0.77	0.39	1	Sequest HT (2)	2	658.346	4.47	55.7335	13429	13429	Q3ZCQ8	ArgAcetylD3	RAPDQAAEIGSR	12	2	55.734	1007	12		N-Term(ArgAcetylD3)	Acetyl:2H(3)@Any N-term	0	27	QE	0.0703091	APDQAAEIGSR	0.933372	0.945092	0.788056	0.374489	4	0.927235	0.945362	1	RR	TRUE	trypsin	2	9	6	0.4	0.181818
High	[R].yRPGTVALR.[E]	HCD	2.52	0.002	0.022	0.211	0.3	1	Sequest HT (2)	3	411.914	0.99	55.7843	13448	13448	P68431; Q16695; Q5TEC6; Q6NXT2; P84243; Q71DI3	ArgAcetylD3	RYRPGTVALR	10	3	55.784	1008	10		N-Term(ArgAcetylD3)	Acetyl:2H(3)@Any N-term	0	27	QE	0.0707636	YRPGTVALR	0.922506	0.932453	0.764672	0.650193	4	0.928293	0.927667	0	HR;HR;HR;HR;HR;HR	TRUE	trypsin	0	11	4	0.266667	0
Low	[R].gGPPGPPISR.[G]	HCD	0.83	0.36	1	-0.542	0.01	1	Sequest HT (2)	2	568.324	-0.97	55.9576	13518	13518	Q04637	ArgAcetylD3	RGGPPGPPISR	11	2	55.958	1009	11		N-Term(ArgAcetylD3)	Acetyl:2H(3)@Any N-term	0	27	QE	0.0723455	GGPPGPPISR	0.319858	0.385996	0.252284	0.317542	2	0.834383	0.264932	1	RR	TRUE	trypsin	0	7	7	0.5	0
High	[R].lMGAGkkEHTGR.[L]	HCD	2.09	0.00032	0.0018	0.512	0.48	1	Sequest HT (2)	3	525.962	-2.05	55.9871	13529	13529	O00193	ArgAcetylD3	RLMGAGKKEHTGR	13	3	55.987	1010	13		N-Term(ArgAcetylD3);K6(Acetyl:2H(3));K7(Acetyl:2H(3))	Acetyl:2H(3)@Any N-term;Acetyl:2H(3)@K;Acetyl:2H(3)@K	0;7;8	27	QE	0.0726091	LMGAGKKEHTGR	0.821488	0.84588	0.641848	0.420593	2	0.7408	0.820245	0	LR	TRUE	trypsin	0	11	10	0.47619	0
High	[R].aQEALGDREPkPTR.[A]	HCD	2.31	5.8e-05	0.0002	0.902	0.55	1	Sequest HT (2)	3	605.332	1	56.0678	13561	13561	Q9UBC1	ArgAcetylD3	RAQEALGDREPKPTR	15	3	56.068	1011	15		N-Term(ArgAcetylD3);K11(Acetyl:2H(3))	Acetyl:2H(3)@Any N-term;Acetyl:2H(3)@K	0;12	27	QE	0.0733455	AQEALGDREPKPTR	0.890497	0.910563	0.728702	0.475188	8	0.873186	0.893111	1	RR	TRUE	trypsin	1	13	8	0.380952	0.0714286
High	[R].gPAEESSSWR.[D]	HCD	2.36	5e-05	0.0001	1.04	0.58	1	Sequest HT (2)	2	653.814	0.09	56.4486	13711	13711	Q14152	ArgAcetylD3	RGPAEESSSWR	11	2	56.449	1012	11		N-Term(ArgAcetylD3)	Acetyl:2H(3)@Any N-term	0	27	QE	0.0768091	GPAEESSSWR	0.884826	0.889388	0.697739	0.663602	4	0.491398	0.94449	1	RR	TRUE	trypsin	0	10	3	0.230769	0
High	[R].dYDDMSPR.[G]	HCD	2.4	0.00021	0.00094	0.614	0.58	1	Sequest HT (2)	2	600.262	-2.41	56.8712	13881	13881	P61978	ArgAcetylD3	RDYDDMSPR	9	2	56.871	1013	9		N-Term(ArgAcetylD3)	Acetyl:2H(3)@Any N-term	0	27	QE	0.0806455	DYDDMSPR	0.965412	0.973925	0.8543	0.722874	6	0.962901	0.971424	1	RR	TRUE	trypsin	1	12	2	0.142857	0.0769231
Low	[R].dYDDmSPR.[G]	HCD	1.35	0.053	0.62	-0.215	0.5	1	Sequest HT (2)	2	608.261	0	56.9321	13906	13906	P61978	ArgAcetylD3	RDYDDMSPR	9	2	56.932	1014	9		N-Term(ArgAcetylD3);M5(Oxidation)	Acetyl:2H(3)@Any N-term;Oxidation@M	0;6	27	QE	0.0812	DYDDMSPR	0.959784	0.964772	0.830518	0.430169	3	0.96721	0.973665	1	RR	TRUE	trypsin	0	6	6	0.5	0
High	[R].eSSLkYQTR.[C]	HCD	2.33	0.0002	0.00088	0.623	0.59	1	Sequest HT (2)	2	679.373	3.91	57.1042	13972	13972	O43684	ArgAcetylD3	RESSLKYQTR	10	2	57.104	1015	10		N-Term(ArgAcetylD3);K5(Acetyl:2H(3))	Acetyl:2H(3)@Any N-term;Acetyl:2H(3)@K	0;6	27	QE	0.0827636	ESSLKYQTR	0.928964	0.933895	0.767226	0.507079	2	0.672408	0.956854	1	RR	TRUE	trypsin	0	9	5	0.357143	0
High	[R].sEkDTAAVVSR.[Q]	HCD	3.78	1.3e-05	4.7e-06	1.63	0.51	1	Sequest HT (2)	2	704.887	0.02	57.4714	14114	14114	Q6WKZ4	ArgAcetylD3	RSEKDTAAVVSR	12	2	57.471	1016	12		N-Term(ArgAcetylD3);K3(Acetyl:2H(3))	Acetyl:2H(3)@Any N-term;Acetyl:2H(3)@K	0;4	27	QE	0.0861	SEKDTAAVVSR	0.851794	0.87792	0.682139	0.315927	6	0.373522	0.95344	1	RR	TRUE	trypsin	5	10	3	0.230769	0.333333
High	[R].qTESDWGkR.[C]	HCD	1.59	0.002	0.023	0.209	0.4	1	Sequest HT (2)	2	676.844	-1.44	57.4813	14118	14118	Q9NYV4	ArgAcetylD3	RQTESDWGKR	10	2	57.481	1017	10		N-Term(ArgAcetylD3);K8(Acetyl:2H(3))	Acetyl:2H(3)@Any N-term;Acetyl:2H(3)@K	0;9	27	QE	0.0861909	QTESDWGKR	0.950481	0.954932	0.808144	0.324453	2	0.943876	0.968904	1	RR	TRUE	trypsin	1	7	6	0.461538	0.125
High	[R].kETkDYGTkR.[L]	HCD	2.65	1.3e-05	4.6e-05	1.2	0.6	1	Sequest HT (2)	2	781.44	-0.03	57.5844	14158	14158	P11172	ArgAcetylD3	RKETKDYGTKR	11	2	57.584	1018	11		N-Term(ArgAcetylD3);K1(Acetyl:2H(3));K4(Acetyl:2H(3));K9(Acetyl:2H(3))	Acetyl:2H(3)@Any N-term;Acetyl:2H(3)@K;Acetyl:2H(3)@K;Acetyl:2H(3)@K	0;2;5;10	27	QE	0.0871273	KETKDYGTKR	0.970833	0.973914	0.854269	0.644465	4	0.980646	0.964974	1	RR	TRUE	trypsin	0	10	4	0.285714	0
High	[R].lNNkSAkVR.[Q]	HCD	2.2	0.00018	0.00078	0.645	0.42	1	Sequest HT (2)	2	660.906	-0.71	57.6315	14179	14179	O75533	ArgAcetylD3	RLNNKSAKVR	10	2	57.632	1019	10		N-Term(ArgAcetylD3);K4(Acetyl:2H(3));K7(Acetyl:2H(3))	Acetyl:2H(3)@Any N-term;Acetyl:2H(3)@K;Acetyl:2H(3)@K	0;5;8	27	QE	0.0875636	LNNKSAKVR	0.930349	0.937054	0.772917	0.417503	3	0.450773	0.964315	0	WR	TRUE	trypsin	1	7	4	0.363636	0.125
High	[R].eMAkEAkR.[L]	HCD	1.49	0.00036	0.0023	0.474	0.26	1	Sequest HT (2)	2	627.352	-0.44	57.6389	14182	14182	P49756	ArgAcetylD3	REMAKEAKR	9	2	57.639	1020	9		N-Term(ArgAcetylD3);K4(Acetyl:2H(3));K7(Acetyl:2H(3))	Acetyl:2H(3)@Any N-term;Acetyl:2H(3)@K;Acetyl:2H(3)@K	0;5;8	27	QE	0.0876273	EMAKEAKR	0.923773	0.93306	0.765744	0.514846	3	0.439283	0.953995	1	RR	TRUE	trypsin	1	9	3	0.25	0.1
High	[R].qVDQLTNDkAR.[V]	HCD	3.19	1.3e-05	7.8e-06	1.53	0.64	1	Sequest HT (2)	2	767.417	1.02	57.7632	14234	14234	P08670	ArgAcetylD3	RQVDQLTNDKAR	12	2	57.763	1021	12		N-Term(ArgAcetylD3);K9(Acetyl:2H(3))	Acetyl:2H(3)@Any N-term;Acetyl:2H(3)@K	0;10	27	QE	0.0887545	QVDQLTNDKAR	0.919236	0.930415	0.761107	0.540733	6	0.927833	0.919529	1	RR	TRUE	trypsin	3	10	2	0.166667	0.230769
High	[R].qVDQLTNDkAR.[V]	HCD	3	0.00011	0.0004	0.769	0.51	1	Sequest HT (2)	3	511.946	-0.46	57.9199	14294	14294	P08670	ArgAcetylD3	RQVDQLTNDKAR	12	3	57.92	1022	12		N-Term(ArgAcetylD3);K9(Acetyl:2H(3))	Acetyl:2H(3)@Any N-term;Acetyl:2H(3)@K	0;10	27	QE	0.0901818	QVDQLTNDKAR	0.949708	0.959949	0.819215	0.780197	7	0.932125	0.986585	1	RR	TRUE	trypsin	1	13	2	0.133333	0.0714286
High	[R].nAEQYkDQADkASTR.[L]	HCD	4.53	1.3e-05	2.6e-05	1.31	0.65	1	Sequest HT (2)	3	672.674	-0.38	58.2685	14427	14427	P35579	ArgAcetylD3	RNAEQYKDQADKASTR	16	3	58.269	1023	16		N-Term(ArgAcetylD3);K6(Acetyl:2H(3));K11(Acetyl:2H(3))	Acetyl:2H(3)@Any N-term;Acetyl:2H(3)@K;Acetyl:2H(3)@K	0;7;12	27	QE	0.0933545	NAEQYKDQADKASTR	0.878433	0.901539	0.715124	0.568769	7	0.607883	0.980818	1	RR	TRUE	trypsin	3	16	4	0.2	0.157895
Medium	[R].qVDQLTNDkAR.[V]	HCD	1.22	0.015	0.23	-0.055	0.25	1	Sequest HT (2)	2	767.417	0.93	58.2944	14437	14437	P08670	ArgAcetylD3	RQVDQLTNDKAR	12	2	58.294	1024	12		N-Term(ArgAcetylD3);K9(Acetyl:2H(3))	Acetyl:2H(3)@Any N-term;Acetyl:2H(3)@K	0;10	27	QE	0.0935818	QVDQLTNDKAR	0.928071	0.93156	0.763104	0.38217	1	0.903348	0.957625	1	RR	TRUE	trypsin	0	5	7	0.583333	0
High	[R].kPASGGLAASSSAPAR.[Q]	HCD	3.61	5.8e-05	0.0002	0.904	0.6	1	Sequest HT (2)	3	558.645	0.98	58.4374	14495	14495	P20585	ArgAcetylD3	RKPASGGLAASSSAPAR	17	3	58.437	1025	17		N-Term(ArgAcetylD3);K1(Acetyl:2H(3))	Acetyl:2H(3)@Any N-term;Acetyl:2H(3)@K	0;2	27	QE	0.0948818	KPASGGLAASSSAPAR	0.987451	0.989675	0.908436	0.769666	10	0.987543	0.988373	1	RR	TRUE	trypsin	0	18	5	0.217391	0
High	[R].lQSEPESIR.[K]	HCD	2.83	0.00033	0.0019	0.503	0.37	1	Sequest HT (2)	2	630.342	-0.65	59.0343	14729	14729	P09496	ArgAcetylD3	RLQSEPESIR	10	2	59.034	1026	10		N-Term(ArgAcetylD3)	Acetyl:2H(3)@Any N-term	0	27	QE	0.100309	LQSEPESIR	0.937815	0.948876	0.795555	0.788288	4	0.893343	0.953578	0	DR	TRUE	trypsin	0	10	2	0.166667	0
High	[R].tNQELQEINR.[V]	HCD	3.56	1.3e-05	6.6e-06	1.56	0.45	1	Sequest HT (2)	2	723.38	0.15	59.0636	14741	14741	P07355; A6NMY6	ArgAcetylD3	RTNQELQEINR	11	2	59.064	1027	11		N-Term(ArgAcetylD3)	Acetyl:2H(3)@Any N-term	0	27	QE	0.100582	TNQELQEINR	0.939767	0.952916	0.803866	0.775328	6	0.821621	0.966402	0	SR;SR	TRUE	trypsin	0	14	2	0.125	0
High	[R].tNQELQEINR.[V]	HCD	2.98	0.00076	0.0069	0.338	0.29	1	Sequest HT (2)	3	482.589	-0.8	59.0826	14749	14749	P07355; A6NMY6	ArgAcetylD3	RTNQELQEINR	11	3	59.083	1028	11		N-Term(ArgAcetylD3)	Acetyl:2H(3)@Any N-term	0	27	QE	0.100755	TNQELQEINR	0.98307	0.986072	0.893623	0.724765	5	0.98901	0.978144	0	SR;SR	TRUE	trypsin	0	11	4	0.266667	0
High	[R].qQSEISAAVER.[A]	HCD	3.89	1.3e-05	4.5e-06	1.64	0.46	1	Sequest HT (2)	2	709.875	0.43	59.5651	14937	14937	Q9Y520	ArgAcetylD3	RQQSEISAAVER	12	2	59.565	1029	12		N-Term(ArgAcetylD3)	Acetyl:2H(3)@Any N-term	0	27	QE	0.105136	QQSEISAAVER	0.911152	0.921106	0.745425	0.152079	7	0.572985	0.946514	1	RR	TRUE	trypsin	7	8	3	0.272727	0.466667
High	[R].gkGGkGLGkGGAkR.[H]	HCD	3.82	1.3e-05	2.5e-05	1.32	0.61	1	Sequest HT (2)	3	551.345	1.46	59.7231	15000	15000	P62805	ArgAcetylD3	RGKGGKGLGKGGAKR	15	3	59.723	1030	15		N-Term(ArgAcetylD3);K2(Acetyl:2H(3));K5(Acetyl:2H(3));K9(Acetyl:2H(3));K13(Acetyl:2H(3))	Acetyl:2H(3)@Any N-term;Acetyl:2H(3)@K;Acetyl:2H(3)@K;Acetyl:2H(3)@K;Acetyl:2H(3)@K	0;3;6;10;14	27	QE	0.106573	GKGGKGLGKGGAKR	0.992243	0.99328	0.926153	0.789952	9	0.973987	0.996134	0	GR	TRUE	trypsin	2	19	2	0.0952381	0.0952381
High	[R].gGSTVPkDGPVRPQNAEEEkR.[G]	HCD	2.87	0.0002	0.00093	0.614	0.55	1	Sequest HT (2)	3	848.116	0.51	60.4765	15302	15302	Q92504	ArgAcetylD3	RGGSTVPKDGPVRPQNAEEEKR	22	3	60.477	1031	22		N-Term(ArgAcetylD3);K7(Acetyl:2H(3));K20(Acetyl:2H(3))	Acetyl:2H(3)@Any N-term;Acetyl:2H(3)@K;Acetyl:2H(3)@K	0;8;21	27	QE	0.113427	GGSTVPKDGPVRPQNAEEEKR	0.985981	0.986689	0.896013	0.663329	5	0.984993	0.986654	1	RR	TRUE	trypsin	2	10	4	0.285714	0.166667
Low	[R].aTLDQVATLER.[S]	HCD	0.71	0.75	1	-1.09	0.11	1	Sequest HT (2)	2	709.391	-7.02	61.2921	15643	15643	Q5TZA2	ArgAcetylD3	RATLDQVATLER	12	2	61.292	1032	12		N-Term(ArgAcetylD3)	Acetyl:2H(3)@Any N-term	0	27	QE	0.120836	ATLDQVATLER	0.734422	0.736581	0.527122	-0.312755	2	-0.0523757	0.869944	1	RR	TRUE	trypsin	1	2	13	0.866667	0.333333
Low	[R].ekkAALEkER.[E]	HCD	1.19	0.67	1	-0.886	0.2	1	Sequest HT (2)	3	513.308	0.1	61.7579	15840	15840	Q8N6M0	ArgAcetylD3	REKKAALEKER	11	3	61.758	1033	11		N-Term(ArgAcetylD3);K2(Acetyl:2H(3));K3(Acetyl:2H(3));K8(Acetyl:2H(3))	Acetyl:2H(3)@Any N-term;Acetyl:2H(3)@K;Acetyl:2H(3)@K;Acetyl:2H(3)@K	0;3;4;9	27	QE	0.125073	EKKAALEKER	0.423938	0.487613	0.324265	-0.0523453	1	-0.125837	0.500641	1	RR	TRUE	trypsin	0	5	12	0.705882	0
Medium	[R].fQVVDSR.[A]	HCD	1.81	0.016	0.24	-0.063	0.31	1	Sequest HT (2)	2	526.29	1.15	62.8429	16291	16291	P25325	ArgAcetylD3	RFQVVDSR	8	2	62.843	1034	8		N-Term(ArgAcetylD3)	Acetyl:2H(3)@Any N-term	0	27	QE	0.134936	FQVVDSR	0.941558	0.947519	0.792835	0.198686	5	0.829897	0.969924	1	RR	TRUE	trypsin	1	7	5	0.416667	0.125
High	[R].mQEMIAR.[M]	HCD	2.7	0.0005	0.0041	0.401	0.39	1	Sequest HT (2)	2	540.281	1.04	64.0317	16779	16779	Q15019	ArgAcetylD3	RMQEMIAR	8	2	64.032	1035	8		N-Term(ArgAcetylD3)	Acetyl:2H(3)@Any N-term	0	27	QE	0.145745	MQEMIAR	0.963114	0.968896	0.840802	0.687192	4	0.828101	0.976661	1	RR	TRUE	trypsin	0	10	2	0.166667	0
High	[R].lELQGPR.[G]	HCD	2.25	0.00052	0.0045	0.391	0.36	1	Sequest HT (2)	2	507.3	-0.7	64.5883	16997	16997	P19338	ArgAcetylD3	RLELQGPR	8	2	64.588	1036	8		N-Term(ArgAcetylD3)	Acetyl:2H(3)@Any N-term	0	27	QE	0.1508	LELQGPR	0.759791	0.829578	0.622838	0.424466	4	0.581145	0.793904	0	IR	TRUE	trypsin	1	9	3	0.25	0.1
High	[R].nAEQYkDQADkASTR.[L]	HCD	4.7	1.3e-05	7.9e-06	1.53	0.6	1	Sequest HT (2)	3	672.675	-0.05	64.685	17036	17036	P35579	ArgAcetylD3	RNAEQYKDQADKASTR	16	3	64.685	1037	16		N-Term(ArgAcetylD3);K6(Acetyl:2H(3));K11(Acetyl:2H(3))	Acetyl:2H(3)@Any N-term;Acetyl:2H(3)@K;Acetyl:2H(3)@K	0;7;12	27	QE	0.151682	NAEQYKDQADKASTR	0.990997	0.992961	0.924419	0.814059	10	0.994709	0.989846	1	RR	TRUE	trypsin	2	18	2	0.1	0.1
High	[R].nAEQYkDQADkASTR.[L]	HCD	2.04	0.0028	0.037	0.158	0.52	1	Sequest HT (2)	2	1008.51	0.77	64.7234	17051	17051	P35579	ArgAcetylD3	RNAEQYKDQADKASTR	16	2	64.723	1038	16		N-Term(ArgAcetylD3);K6(Acetyl:2H(3));K11(Acetyl:2H(3))	Acetyl:2H(3)@Any N-term;Acetyl:2H(3)@K;Acetyl:2H(3)@K	0;7;12	27	QE	0.152027	NAEQYKDQADKASTR	0.973555	0.975793	0.859638	0.421117	4	0.96252	0.982427	1	RR	TRUE	trypsin	2	6	6	0.5	0.25
High	[R].rLLEGEESR.[L]	HCD	1.89	0.0011	0.011	0.285	0.33	1	Sequest HT (2)	2	645.353	-0.62	65.2355	17253	17253	ZZZsp	ArgAcetylD3	RRLLEGEESR	10	2	65.236	1039	10		N-Term(ArgAcetylD3)	Acetyl:2H(3)@Any N-term	0	27	QE	0.156691	RLLEGEESR	0.922923	0.932495	0.764746	0.462033	4	0.381506	0.957894	0	YR	TRUE	trypsin	2	9	3	0.25	0.181818
High	[R].lLAkAR.[S]	HCD	1.01	0.0039	0.053	0.119	0.18	1	Sequest HT (2)	2	459.312	-0.19	65.6513	17416	17416	O94906	ArgAcetylD3	RLLAKAR	7	2	65.651	1040	7		N-Term(ArgAcetylD3);K4(Acetyl:2H(3))	Acetyl:2H(3)@Any N-term;Acetyl:2H(3)@K	0;5	27	QE	0.160464	LLAKAR	0.864717	0.869542	0.671172	0.639565	3	0.333806	0.914321	1	RR	TRUE	trypsin	0	8	2	0.2	0
High	[R].dkVLIR.[I]	HCD	2.15	0.00083	0.0077	0.327	0.24	1	Sequest HT (2)	2	495.322	0	66.0953	17590	17590	P07355; A6NMY6	ArgAcetylD3	RDKVLIR	7	2	66.095	1041	7		N-Term(ArgAcetylD3);K2(Acetyl:2H(3))	Acetyl:2H(3)@Any N-term;Acetyl:2H(3)@K	0;3	27	QE	0.1645	DKVLIR	0.982305	0.984703	0.888506	0.702174	5	0.92757	0.987779	0	TR;TR	TRUE	trypsin	0	10	2	0.166667	0
High	[R].ekAEELAAR.[Q]	HCD	3.21	5.8e-05	0.00021	0.894	0.37	1	Sequest HT (2)	2	631.851	-1.87	66.1222	17601	17601	Q04323	ArgAcetylD3	REKAEELAAR	10	2	66.122	1042	10		N-Term(ArgAcetylD3);K2(Acetyl:2H(3))	Acetyl:2H(3)@Any N-term;Acetyl:2H(3)@K	0;3	27	QE	0.164745	EKAEELAAR	0.974241	0.978558	0.867929	0.693822	6	0.888047	0.983388	1	RR	TRUE	trypsin	1	13	2	0.133333	0.0714286
High	[R].sLLTkR.[V]	HCD	2.31	0.00088	0.0082	0.319	0.17	1	Sequest HT (2)	2	482.314	-0.67	66.2837	17665	17665	Q9HD15	ArgAcetylD3	RSLLTKR	7	2	66.284	1043	7		N-Term(ArgAcetylD3);K5(Acetyl:2H(3))	Acetyl:2H(3)@Any N-term;Acetyl:2H(3)@K	0;6	27	QE	0.166218	SLLTKR	0.911749	0.927632	0.756318	0.536087	3	0.403607	0.943192	1	RR	TRUE	trypsin	0	7	3	0.3	0
High	[R].iDkDQDGkITR.[Q]	HCD	2.15	0.00056	0.0047	0.385	0.63	1	Sequest HT (2)	2	790.441	0.16	66.372	17700	17700	Q9UPN3; Q03001	ArgAcetylD3	RIDKDQDGKITR	12	2	66.372	1044	12		N-Term(ArgAcetylD3);K3(Acetyl:2H(3));K8(Acetyl:2H(3))	Acetyl:2H(3)@Any N-term;Acetyl:2H(3)@K;Acetyl:2H(3)@K	0;4;9	27	QE	0.167018	IDKDQDGKITR	0.980558	0.982327	0.880133	0.628471	3	0.963923	0.991264	1	RR;RR	TRUE	trypsin	0	9	5	0.357143	0
High	[R].lTPEELER.[MA]	HCD	2.29	0.0036	0.049	0.129	0	1	Sequest HT (2)	2	594.327	0.51	67.0097	17953	17953	O95399	ArgAcetylD3	RLTPEELER	9	2	67.01	1045	9		N-Term(ArgAcetylD3)	Acetyl:2H(3)@Any N-term	0	27	QE	0.172818	LTPEELER	0.933896	0.945568	0.788985	0.63893	4	0.657575	0.968259	0	AR	TRUE	trypsin	0	10	3	0.230769	0
High	[R].qAVDVSPLR.[V]	HCD	2.97	6.5e-05	0.00022	0.883	0.46	1	Sequest HT (2)	2	593.343	0.01	67.136	18003	18003	P46782	ArgAcetylD3	RQAVDVSPLR	10	2	67.136	1046	10		N-Term(ArgAcetylD3)	Acetyl:2H(3)@Any N-term	0	27	QE	0.173964	QAVDVSPLR	0.957369	0.964575	0.830043	0.755084	4	0.916534	0.974779	1	RR	TRUE	trypsin	0	11	2	0.153846	0
High	[R].kWkEEEkR.[K]	HCD	2.12	0.00049	0.004	0.405	0.25	1	Sequest HT (2)	2	734.918	-0.22	67.4286	18122	18122	Q9BZI7	ArgAcetylD3	RKWKEEEKR	9	2	67.429	1047	9		N-Term(ArgAcetylD3);K1(Acetyl:2H(3));K3(Acetyl:2H(3));K7(Acetyl:2H(3))	Acetyl:2H(3)@Any N-term;Acetyl:2H(3)@K;Acetyl:2H(3)@K;Acetyl:2H(3)@K	0;2;4;8	27	QE	0.176627	KWKEEEKR	0.928111	0.938471	0.775516	0.642595	4	0.918578	0.926172	1	RR	TRUE	trypsin	0	10	4	0.285714	0
High	[R].dGLkAIAR.[I]	HCD	2.82	0.0002	0.00087	0.627	0.45	1	Sequest HT (2)	2	545.337	1.14	68.5958	18591	18591	Q9BTW9	ArgAcetylD3	RDGLKAIAR	9	2	68.596	1048	9		N-Term(ArgAcetylD3);K4(Acetyl:2H(3))	Acetyl:2H(3)@Any N-term;Acetyl:2H(3)@K	0;5	27	QE	0.187236	DGLKAIAR	0.954221	0.963166	0.826675	0.683834	7	0.752295	0.974095	1	RR	TRUE	trypsin	0	13	2	0.133333	0
[truncated: 10,359 more rows]
