# Supplementary material for: Implementing N-terminomics and machine learning to probe in vivo Nt-arginylation
Source: Research Square preprint supplement (doi:10.21203/rs.3.rs-6500900/v1), 2025-05-12
Supplement: Supplementary file 3 [file 7e418c44b0c43607fdc819f0.xlsx]

## Sheet: Sheet Description
Sheet	Description
Column headers	Description for column headers
PSMs	All identified PSMs of putative Nt-arginylated peptides in this study
Modified Peptides	Peptides annotated from the PSMs
Alphafold	Raw data of protein structure scores from AlphaFold on the peptides

## Sheet: Column Headers
Column	Description
Confidence	Indicates a confidence level associated with the peptide sequence at the top level: green for high confidence, yellow for medium confidence, and red for low confidence.
Identifying Node Type	Displays the name of the search engine node.
Identifying Node	Displays the name of the search engine node, the letter representing the number of MSF files used to generate the .pdResult file, and the number assigned to the node in the workflow.
Search ID
Identifying Node No	Displays the number assigned to the node in the workflow.
PSM Ambiguity
Sequence	Displays the sequence of amino acids that compose the peptide in the peptide group.
Annotated Sequence	Displays the names of the flanking residues of a peptide in a protein.
Number of Proteins	Displays the number of proteins containing the PSM.
Master Protein Accessions	Displays the unique identifiers (accessions) of all master proteins from all protein groups that include the given peptide sequence.
accession_master
Master Protein Descriptions	Displays a description of the master proteins.
Protein Accessions	Displays the unique identifiers (accessions) of all proteins that include the given peptide sequence.
Protein Descriptions	Describes the proteins associated with the peptide. This description is taken from the FASTA file.
Number of Missed Cleavages	Displays the number of cleavage sites in a peptide sequence that a cleavage reagent (enzyme) did not cleave. This number excludes cases where an amino acid, such as proline, inhibits the cleaving enzyme. For example, if proline resides next to lysine or arginine, trypsin does not cleave the lysine or arginine. The application returns a 0 value for the # Missed Cleavages when all peptides have bee…
Charge	Displays the charge state of the peptide.
Original Precursor Charge	Displays the charge state of the precursor as stored in the scan header of the raw data file.
Delta Score	Displays a measure of the difference between the top two scores for the peptides identified by that spectrum. The application calculates this score a delta Score = Score(Rank N Peptide) – Score(Rank 1 Peptide)/Score(Rank 1 Peptide).
Delta Cn	Displays the normalized score difference between the currently selected PSM and the highest-scoring PSM for that spectrum.
Rank
Search Engine Rank
Concatenated Rank	Displays the value for the “best” PSM that the search engine found. This value includes the rank of the decoy PSMs for the same spectra.
mz in Da	Displays the mass-to-charge ratio of the precursor ion, in daltons.
Aligned mz in Da
MHplus in Da	Displays the protonated monoisotopic mass of the peptides, in daltons. It is the measured mass, as opposed to the expected mass in the Theo. MH+ [Da] column.
Theo MHplus in Da	Displays the mass calculated from the sequence, the amino acid masses, and the defined modification masses, as opposed to the measured mass.
Delta M in ppm
Delta mz in Da
Ions Matched	Displays the percentage of ions matched by the search engine. The application multiplies the ratio in this column by 100 and uses it as a value.
Matched Ions	Displays the number of ions matched by the search engine.
Total Ions
Intensity	Displays the intensity of the precursor ion.
Activation Type	Displays the activation type of the spectrum where the application identified the peptide.
MS Order	Indicates the order of the MS spectrum: MS2 is an MS/MS scan.
Isolation Interference in Percent	Displays the percentage of interference by co-isolation within the precursor isolation window. The application does not populate this column for a PQD quantification report. It calculates the isolation interference only for precursors from MS1 spectra with high resolution.
Ion Inject Time in ms	Specifies the time, in milliseconds, used to accumulate ions in the mass spectrometer to reach their target value before they are scanned out. Low ion injection times are desirable because they indicate high transmission and fast cycle times. Ion injection times that slowly increase might indicate lower transmission, the need for multiplier gain calibration, or both. The PSMs page displays the Io…
RT in min	Displays the retention time when the peptide was observed, in minutes.
First Scan	Displays the number of the first scan used to identify the peptide.
Last Scan	Displays the number of the last scan used to identify the peptide.
Master Scans	Displays the precursor scan number or numbers.
Spectrum File
File ID	Displays the short identifier of the input file that the fragment spectrum belongs to.
Quan Info
Peptides Matched	Displays the number of peptide candidates that fall into the precursor mass tolerance window set for the search.
XCorr	Scores the number of fragment ions that are common to two different peptides with the same precursor mass and calculates the cross-correlation score for all candidate peptides queried from the database
Number of Protein Groups	Displays the number of protein groups containing the peptide.
Contaminant	Displays an X symbol next to the proteins marked as contaminants in the searched FASTA file or files.
Percolator q-Value	Displays the q-value of the best PSM if the peptide groups that the search node identified.
Percolator PEP	Displays the posterior error probability (PEP) for the identified peptide.
Percolator SVMScore	Displays the maximum Percolator score for the identified peptide.
Precursor Abundance
Apex RT in min	Displays the retention time at the apex of the feature.
index
nmod	Displays N-terminal modifications
arginylation	Boolian values for Nt-arginylation modification.
start_with_R	Indicator for a Arg-starting peptide.
specfile
enzyme
set
fraction
experiment
replicate
Modifications	Displays the static and dynamic modifications identified in the peptide.
mods
nAA	number of amino acid residues
nce	normalized collision energy
instrument	MS instrument
charge
mod_sites
sequence	modified sequences to have R if it is Nt-arginylated.
irt	RT in minute
scan_num
percol_svm
diagnostic_ion_mz	actual m/z of diagnostic ion
diagnostic_ion_int_relative	relative intensity over the highest intensity of a scan, for a diagnostic ion
left_time	gradient start time
right_time	gradient end time
spec_idx
PCC	Pearson's correlation coefficients after evalutating with MS2 prediction model.
COS	cosine similarity coefficients after evalutating with MS2 prediction model.
SA	spectral angle coefficients after evalutating with MS2 prediction model.
SPC	Spearman's correlation coefficients after evalutating with MS2 prediction model.
bion_count	count of matched b-ion in a spectrum
bion_pcc	PCC for b-ions
yion_pcc	PCC for y-ions
FN	number of false negatives
TP	number of true positives
FP	number of false positives
spec_FPR	calculated Spectral FPR
spec_FNR	calculated Spectral FNR
ms2_filter	1 when a spectrum passes MS2 module, otherwise 0
rt_norm	normalized RT using left time and right time
rt_pred	predicted normalized RT
fit	fitted value for the linear RT model
lwr	lower boundary for 95% confidence in the RT model
upr	upper boundary for 95% confidence in the RT model
rt_test	1 when a spectrum passes RT module, otherwise 0
position_master	site residual position in master protein accession.
prot_pos_master	(master protein accession)_(position in master protein accession)
gene	Gene name
prot_name	UniProt protein name
accession	UniProt accession
position	site residual position in master protein accession.
p5p1	P5-P1 residues
p1	P1 residue
p2	P2-P1 residues
p3	P3-P1 residues
prot_pos_reposition	We reselect the protein which is matched with lowest position for the sequence. (Gene name)_(protein accession)_(UniProt protein name)_(position in protein accession)
b_ion_count	count of matched b-ion in a spectrum
y_ion_count	count of matched y-ion in a spectrum
b_y_ttest	ttest p-value
pcc_check	1 when a spectrum passes MS2 module, otherwise 0
rt_check	1 when a spectrum passes RT module, otherwise 0
b_y_ttest_check	1 when a spectrum passes MET module, otherwise 0
p2gv_check	1 when a spectrum originates from the sequence that is P2P1=GV or VG
p1r_check	1 when a spectrum originates from the sequence that is P1=R
cleavage_type	cleavage info. from signal, transit (mTP), or protease (Merops protease id)
cleavage_score (ProCleave)	predicted cleavage site score that was derived from ProCleave
cleavage_name	Procleave: cleavage site was predicted by procleave, pos/neg0 to pos/neg2: signal or transit peptide cleavage site with +1 to +2 (pos), -1 to -2 (neg) or 0 (Exact site)
Localizations by DeepLoc	Predicted localization derived using DeepLoc
p5p5prime	P5-P5' residues
score_sum (ML-based filtering)	scores that derived from sum of the three module. 3 is the highest score.

## Sheet: PSMs
Confidence	Identifying Node Type	Identifying Node	Search ID	Identifying Node No	PSM Ambiguity	Sequence	Annotated Sequence	Number of Proteins	Master Protein Accessions	accession_master	Master Protein Descriptions	Protein Accessions	Protein Descriptions	Number of Missed Cleavages	Charge	Original Precursor Charge	Delta Score	Delta Cn	Rank	Search Engine Rank	Concatenated Rank	mz in Da	Aligned mz in Da	MHplus in Da	Theo MHplus in Da	Delta M in ppm	Delta mz in Da	Ions Matched	Matched Ions	Total Ions	Intensity	Activation Type	MS Order	Isolation Interference in Percent	Ion Inject Time in ms	RT in min	First Scan	Last Scan	Master Scans	Spectrum File	File ID	Quan Info	Peptides Matched	XCorr	Number of Protein Groups	Contaminant	Percolator q-Value	Percolator PEP	Percolator SVMScore
High	Sequest HT	Sequest HT (A5)	A	5	Selected	DPEEEEEEEEELVDPLTTVR	[G].dPEEEEEEEEELVDPLTTVR.[E]	2	P07919	P07919	Cytochrome b-c1 complex subunit 6, mitochondrial OS=Homo sapiens OX=9606 GN=UQCRH PE=1 SV=2	P07919; A0A096LP55	Cytochrome b-c1 complex subunit 6, mitochondrial OS=Homo sapiens OX=9606 GN=UQCRH PE=1 SV=2; Cytochrome b-c1 complex subunit 6-like, mitochondrial OS=Homo sapiens OX=9606 GN=UQCRHL PE=3 SV=1	0	3	3	0.683	0	1	1	1	863.403	863.403	2588.2	2588.19	1.07	0.00093	0/0	0	0	1.67067e+06	HCD	MS2	44.468	120	104.786	34591	34591	34583	200821_HELA_MGTG_iNrich_bRP_F07.raw	F1.7	NA	1702	5.71	1	FALSE	9.269e-06	4.071e-09	1.843
High	Sequest HT	Sequest HT (A5)	A	5	Unambiguous	DPEEEEEEEEELVDPLTTVR	[G].dPEEEEEEEEELVDPLTTVR.[E]	2	P07919	P07919	Cytochrome b-c1 complex subunit 6, mitochondrial OS=Homo sapiens OX=9606 GN=UQCRH PE=1 SV=2	P07919; A0A096LP55	Cytochrome b-c1 complex subunit 6, mitochondrial OS=Homo sapiens OX=9606 GN=UQCRH PE=1 SV=2; Cytochrome b-c1 complex subunit 6-like, mitochondrial OS=Homo sapiens OX=9606 GN=UQCRHL PE=3 SV=1	0	3	3	0.6171	0	1	1	1	863.403	863.403	2588.2	2588.19	1	0.00086	0/0	0	0	2.63673e+06	HCD	MS2	21.9749	58.142	93.0426	43341	43341	43332	220621_E_202.raw	F6.2	NA	1695	5.85	1	FALSE	9.269e-06	1.07e-07	1.486
High	Sequest HT	Sequest HT (A5)	A	5	Selected	EFQHIIPISAVTGEGIEELKNCIR	[V].eFQHIIPISAVTGEGIEELkNcIR.[K]	1	A4D1E9	A4D1E9	GTP-binding protein 10 OS=Homo sapiens OX=9606 GN=GTPBP10 PE=1 SV=1	A4D1E9	GTP-binding protein 10 OS=Homo sapiens OX=9606 GN=GTPBP10 PE=1 SV=1	0	3	3	0.5263	0	1	1	1	1000.53	1000.53	2999.56	2999.59	-8.04	-0.00804	0/0	0	0	672724	HCD	MS2	0	120	121.795	41451	41451	41439	200925_HELA_iNrich_bRP_F03.raw	F2.3	NA	3158	4.75	1	FALSE	3.982e-05	0.0002574	0.628
High	Sequest HT	Sequest HT (A5)	A	5	Selected	QEMATVASSSSLEKSYELPDGQVITIGNER	[E].qEmATVASSSSLEkSYELPDGQVITIGNER.[F]	1	A5A3E0	A5A3E0	POTE ankyrin domain family member F OS=Homo sapiens OX=9606 GN=POTEF PE=1 SV=2	A5A3E0	POTE ankyrin domain family member F OS=Homo sapiens OX=9606 GN=POTEF PE=1 SV=2	0	3	3	0.4455	0	1	1	1	1168.23	1168.23	3502.69	3502.71	-7.09	-0.00828	0/0	0	0	650157	HCD	MS2	0	120	117.86	54193	54193	54187	220621_E_109.raw	F5.9	NA	2944	3.21	1	FALSE	0.001376	0.01232	0.227
High	Sequest HT	Sequest HT (A5)	A	5	Unambiguous	QEMATVASSSSLEKSYELPDGQVITIGNER	[E].qEmATVASSSSLEkSYELPDGQVITIGNER.[F]	1	A5A3E0	A5A3E0	POTE ankyrin domain family member F OS=Homo sapiens OX=9606 GN=POTEF PE=1 SV=2	A5A3E0	POTE ankyrin domain family member F OS=Homo sapiens OX=9606 GN=POTEF PE=1 SV=2	0	3	3	0.5681	0	1	1	1	1168.23	1168.23	3502.68	3502.71	-7.94	-0.00927	0/0	0	0	340239	HCD	MS2	0	120	119.787	48525	48525	48514	220621_E_309.raw	F7.9	NA	2917	2.57	1	FALSE	0.0002919	0.002128	0.404
High	Sequest HT	Sequest HT (A5)	A	5	Unambiguous	NQELQEINRVYKEMYKTDLEKDIISDTSGDFR	[T].nQELQEINRVYkEMYkTDLEkDIISDTSGDFR.[K]	2	P07355	P07355	Annexin A2 OS=Homo sapiens OX=9606 GN=ANXA2 PE=1 SV=2	A6NMY6; P07355	Putative annexin A2-like protein OS=Homo sapiens OX=9606 GN=ANXA2P2 PE=5 SV=2; Annexin A2 OS=Homo sapiens OX=9606 GN=ANXA2 PE=1 SV=2	1	3	0	0.5429	0	1	1	1	1405.7	1405.7	4215.09	4215.09	-1.94	-0.00272	0/0	0	0	2.838e+06	HCD	MS2	0	95.476	127.524	54134	54134	54122	220621_E_306.raw	F7.6	NA	3768	3.26	1	FALSE	0.0008236	0.007118	0.283
High	Sequest HT	Sequest HT (A5)	A	5	Selected	QTVALELLESER	[R].qTVALELLESER.[K]	1	A8MVX0	A8MVX0	Rho guanine nucleotide exchange factor 33 OS=Homo sapiens OX=9606 GN=ARHGEF33 PE=2 SV=2	A8MVX0	Rho guanine nucleotide exchange factor 33 OS=Homo sapiens OX=9606 GN=ARHGEF33 PE=2 SV=2	0	2	2	0.1434	0	1	1	1	795.431	795.431	1589.86	1589.86	-1.12	-0.00089	0/0	0	0	2.59988e+06	HCD	MS2	22.8726	94.166	92.7771	41973	41973	41967	220621_E_111.raw	F5.11	NA	2181	2.72	1	FALSE	0.003451	0.03064	0.125
High	Sequest HT	Sequest HT (A5)	A	5	Unambiguous	DQPAASGDSDDDEPPPLPR	[G].dQPAASGDSDDDEPPPLPR.[L]	1	O00264	O00264	Membrane-associated progesterone receptor component 1 OS=Homo sapiens OX=9606 GN=PGRMC1 PE=1 SV=3	O00264	Membrane-associated progesterone receptor component 1 OS=Homo sapiens OX=9606 GN=PGRMC1 PE=1 SV=3	0	2	2	0.6495	0	1	1	1	1090.5	1090.5	2179.99	2179.99	-1.26	-0.00137	0/0	0	0	774522	HCD	MS2	0	120	70.6679	19435	19435	19423	200821_HELA_MGTG_iNrich_bRP_F09.raw	F1.9	NA	1343	3.68	1	FALSE	9.269e-06	5.186e-07	1.315
High	Sequest HT	Sequest HT (A5)	A	5	Selected	QEEIKKEPEKPIDR	[T].qEEIkkEPEkPIDR.[E]	1	O00422	O00422	Histone deacetylase complex subunit SAP18 OS=Homo sapiens OX=9606 GN=SAP18 PE=1 SV=1	O00422	Histone deacetylase complex subunit SAP18 OS=Homo sapiens OX=9606 GN=SAP18 PE=1 SV=1	0	3	0	0.2877	0	1	1	1	692.72	692.72	2076.15	2076.14	4.92	0.00341	0/0	0	0	10380239	HCD	MS2	83.3482	9.226	64.714	26597	26597	26588	220621_E_103.raw	F5.3	NoneMonoisotopic	1784	2.85	1	FALSE	0.0009109	0.008313	0.268
High	Sequest HT	Sequest HT (A5)	A	5	Unambiguous	NSVASPSTGDDDDPDKDKKR	[D].nSVASPSTGDDDDPDkDkkR.[H]	1	O00470	O00470	Homeobox protein Meis1 OS=Homo sapiens OX=9606 GN=MEIS1 PE=1 SV=1	O00470	Homeobox protein Meis1 OS=Homo sapiens OX=9606 GN=MEIS1 PE=1 SV=1	0	3	3	0.5688	0	1	1	1	828.736	828.736	2484.19	2484.19	2.71	0.00224	0/0	0	0	116427	HCD	MS2	18.6299	120	54.8161	18309	18309	18299	220621_E_310.raw	F7.10	NA	2446	2.18	1	FALSE	0.0003882	0.003141	0.365
High	Sequest HT	Sequest HT (A5)	A	5	Unambiguous	DQQFAGLDLNSSDNQSGGSTASKGR	[L].dQQFAGLDLNSSDNQSGGSTASkGR.[Y]	1	O00571	O00571	ATP-dependent RNA helicase DDX3X OS=Homo sapiens OX=9606 GN=DDX3X PE=1 SV=3	O00571	ATP-dependent RNA helicase DDX3X OS=Homo sapiens OX=9606 GN=DDX3X PE=1 SV=3	0	3	0	0.3656	0	1	1	1	929.443	929.444	2786.32	2786.32	-1.82	-0.00169	0/0	0	0	5.71467e+06	HCD	MS2	88.3436	7.181	96.4618	43771	43771	43761	220621_E_109.raw	F5.9	NA	2299	3.31	1	FALSE	9.269e-06	1.693e-05	0.934
High	Sequest HT	Sequest HT (A5)	A	5	Selected	NLGLATSFFNER	[G].nLGLATSFFNER.[N]	1	O00571	O00571	ATP-dependent RNA helicase DDX3X OS=Homo sapiens OX=9606 GN=DDX3X PE=1 SV=3	O00571	ATP-dependent RNA helicase DDX3X OS=Homo sapiens OX=9606 GN=DDX3X PE=1 SV=3	0	2	0	0.4063	0	1	1	1	785.908	785.908	1570.81	1570.81	2.82	0.00222	0/0	0	0	3126532	HCD	MS2	53.3163	86.191	114.818	52703	52703	52692	220621_E_111.raw	F5.11	NoneMonoisotopic	2408	3.47	1	FALSE	3.982e-05	0.0001425	0.695
High	Sequest HT	Sequest HT (A5)	A	5	Selected	DQQFAGLDLNSSDNQSGGSTASKGR	[L].dQQFAGLDLNSSDNQSGGSTASkGR.[Y]	1	O00571	O00571	ATP-dependent RNA helicase DDX3X OS=Homo sapiens OX=9606 GN=DDX3X PE=1 SV=3	O00571	ATP-dependent RNA helicase DDX3X OS=Homo sapiens OX=9606 GN=DDX3X PE=1 SV=3	0	3	0	0.4612	0	1	1	1	929.444	929.444	2786.32	2786.32	-1	-0.00093	0/0	0	0	8273387	HCD	MS2	87.4798	5.962	98.2798	44256	44256	44255	220621_E_210.raw	F6.10	NA	2339	3.99	1	FALSE	9.269e-06	1.833e-05	0.925
High	Sequest HT	Sequest HT (A5)	A	5	Selected	NLGLATSFFNER	[G].nLGLATSFFNER.[N]	1	O00571	O00571	ATP-dependent RNA helicase DDX3X OS=Homo sapiens OX=9606 GN=DDX3X PE=1 SV=3	O00571	ATP-dependent RNA helicase DDX3X OS=Homo sapiens OX=9606 GN=DDX3X PE=1 SV=3	0	2	0	0.3514	0	1	1	1	785.911	785.911	1570.82	1570.81	6.36	0.00499	0/0	0	0	2.58502e+06	HCD	MS2	52.4842	120	116.312	44191	44191	44186	220621_E_311.raw	F7.11	NoneMonoisotopic	2427	3.33	1	FALSE	9.516e-05	0.0005078	0.553
High	Sequest HT	Sequest HT (A5)	A	5	Selected	QDDISSSYTTTTTITAPPSR	[L].qDDISSSYTTTTTITAPPSR.[V]	1	O00767	O00767	Stearoyl-CoA desaturase OS=Homo sapiens OX=9606 GN=SCD PE=1 SV=2	O00767	Stearoyl-CoA desaturase OS=Homo sapiens OX=9606 GN=SCD PE=1 SV=2	0	3	3	0.4844	0	1	1	1	782.051	782.05	2344.14	2344.13	1.32	0.00103	0/0	0	0	2367574	HCD	MS2	35.035	46.474	68.3192	29016	29016	29006	220621_E_203.raw	F6.3	NA	2658	4.5	1	FALSE	2.619e-05	6.559e-05	0.784
High	Sequest HT	Sequest HT (A5)	A	5	Unambiguous	NTMAFQNDVYEWAR	[A].nTMAFQNDVYEWAR.[D]	1	O00767	O00767	Stearoyl-CoA desaturase OS=Homo sapiens OX=9606 GN=SCD PE=1 SV=2	O00767	Stearoyl-CoA desaturase OS=Homo sapiens OX=9606 GN=SCD PE=1 SV=2	0	2	2	0.5976	0	1	1	1	973.949	973.949	1946.89	1946.89	0.36	0.00035	0/0	0	0	1833514	HCD	MS2	13.7932	120	88.0678	34200	34200	34193	220428_iNrich_HELA_MG132_Trypsin_08.raw	F12.8	NA	1333	5.07	1	FALSE	9.269e-06	6.892e-09	1.785
High	Sequest HT	Sequest HT (A5)	A	5	Unambiguous	QDPAVIQHRPSR	[F].qDPAVIQHRPSR.[Q]	1	O14828	O14828	Secretory carrier-associated membrane protein 3 OS=Homo sapiens OX=9606 GN=SCAMP3 PE=1 SV=3	O14828	Secretory carrier-associated membrane protein 3 OS=Homo sapiens OX=9606 GN=SCAMP3 PE=1 SV=3	0	4	4	0.5013	0	1	1	1	402.222	402.222	1605.87	1605.86	0.36	0.00014	0/0	0	0	544976	HCD	MS2	25.0422	120	35.8329	9693	9693	9688	220621_E_208.raw	F6.8	NA	2191	3.87	1	FALSE	9.269e-06	3.965e-05	0.84
High	Sequest HT	Sequest HT (B5)	B	5	Selected	QDPAVIQHRPSRQ	[F].qDPAVIQHRPSRQ.[Y]	1	O14828	O14828	Secretory carrier-associated membrane protein 3 OS=Homo sapiens OX=9606 GN=SCAMP3 PE=1 SV=3	O14828	Secretory carrier-associated membrane protein 3 OS=Homo sapiens OX=9606 GN=SCAMP3 PE=1 SV=3	0	4	4	0.2551	0	1	1	1	434.236	434.235	1733.92	1733.92	-0.75	-0.00032	0/0	0	0	436801	HCD	MS2	81.9341	120	35.545	9516	9516	9507	210416_iNrich_Chymotrypsin_MGTG_bRP_09.raw	F3.9	NA	4246	2.94	1	FALSE	0.0002459	0.0005194	0.529
High	Sequest HT	Sequest HT (A5)	A	5	Selected	NPLPVNSGQAQR	[Q].nPLPVNSGQAQR.[V]	1	O14965	O14965	Aurora kinase A OS=Homo sapiens OX=9606 GN=AURKA PE=1 SV=3	O14965	Aurora kinase A OS=Homo sapiens OX=9606 GN=AURKA PE=1 SV=3	0	2	2	0.4358	0	1	1	1	741.896	741.896	1482.79	1482.79	-0.06	-5e-05	0/0	0	0	2.26857e+06	HCD	MS2	32.7649	101.299	49.5387	15624	15624	15616	220428_iNrich_HELA_MG132_Trypsin_11.raw	F12.11	NA	2098	3.35	1	FALSE	1.762e-05	6.231e-05	0.789
High	Sequest HT	Sequest HT (A5)	A	5	Selected	NAPSPSIGGSSR	[D].nAPSPSIGGSSR.[L]	1	O15014	O15014	Zinc finger protein 609 OS=Homo sapiens OX=9606 GN=ZNF609 PE=1 SV=2	O15014	Zinc finger protein 609 OS=Homo sapiens OX=9606 GN=ZNF609 PE=1 SV=2	0	2	2	0.2857	0	1	1	1	666.337	666.337	1331.67	1331.67	-5.32	-0.00354	0/0	0	0	1.1097e+06	HCD	MS2	41.4162	120	55.0059	12520	12520	12511	200821_HELA_MGTG_iNrich_bRP_F09.raw	F1.9	NA	2100	3.08	1	FALSE	0.001174	0.01034	0.245
High	Sequest HT	Sequest HT (A5)	A	5	Unambiguous	NLNKAMTLQEAEAFVGAER	[T].nLNkAmTLQEAEAFVGAER.[C]	1	O15031	O15031	Plexin-B2 OS=Homo sapiens OX=9606 GN=PLXNB2 PE=1 SV=3	O15031	Plexin-B2 OS=Homo sapiens OX=9606 GN=PLXNB2 PE=1 SV=3	0	3	3	0.4151	0	1	1	1	785.728	785.728	2355.17	2355.19	-7.5	-0.00589	0/0	0	0	738127	HCD	MS2	24.3319	116.098	109.998	51273	51273	51262	220621_E_104.raw	F5.4	NA	2849	3.83	1	FALSE	0.00255	0.02275	0.159
High	Sequest HT	Sequest HT (A5)	A	5	Selected	DLNNPFKDPSVTQVTR	[P].dLNNPFkDPSVTQVTR.[N]	1	O15126	O15126	Secretory carrier-associated membrane protein 1 OS=Homo sapiens OX=9606 GN=SCAMP1 PE=1 SV=2	O15126	Secretory carrier-associated membrane protein 1 OS=Homo sapiens OX=9606 GN=SCAMP1 PE=1 SV=2	0	2	0	0.1693	0	1	1	1	1039.05	1039.04	2077.08	2077.09	-5.52	-0.00573	0/0	0	0	1.78205e+06	HCD	MS2	85.5164	120	119.582	47059	47059	47050	220621_E_307.raw	F7.7	NoneMonoisotopic	2739	2.54	1	FALSE	3.982e-05	0.0002606	0.626
High	Sequest HT	Sequest HT (A5)	A	5	Unambiguous	QNKGLLETTVQKVAR	[C].qNkGLLETTVQkVAR.[V]	1	O43290	O43290	U4/U6.U5 tri-snRNP-associated protein 1 OS=Homo sapiens OX=9606 GN=SART1 PE=1 SV=1	O43290	U4/U6.U5 tri-snRNP-associated protein 1 OS=Homo sapiens OX=9606 GN=SART1 PE=1 SV=1	0	3	3	0.501	0	1	1	1	659.721	659.721	1977.15	1977.14	2.7	0.00178	0/0	0	0	1.5515e+06	HCD	MS2	36.2172	113.588	82.9507	37252	37252	37248	220621_E_212.raw	F6.12	NA	827	5.05	1	FALSE	9.269e-06	9.389e-06	0.999
High	Sequest HT	Sequest HT (A5)	A	5	Selected	NRWREELSHMKR	[N].nRWREELSHMkR.[L]	1	O43474	O43474	Krueppel-like factor 4 OS=Homo sapiens OX=9606 GN=KLF4 PE=1 SV=3	O43474	Krueppel-like factor 4 OS=Homo sapiens OX=9606 GN=KLF4 PE=1 SV=3	2	3	3	0.1822	0	1	1	1	630.331	630.331	1888.98	1888.98	-1.87	-0.00118	0/0	0	0	4.02781e+06	HCD	MS2	43.8355	19.86	94.6551	30201	30201	30198	200821_HELA_MGTG_iNrich_bRP_F02.raw	F1.2	NA	2655	2.47	1	FALSE	0.001373	0.01226	0.227
High	Sequest HT	Sequest HT (A5)	A	5	Unambiguous	NRWREELSHMKR	[N].nRWREELSHMkR.[L]	1	O43474	O43474	Krueppel-like factor 4 OS=Homo sapiens OX=9606 GN=KLF4 PE=1 SV=3	O43474	Krueppel-like factor 4 OS=Homo sapiens OX=9606 GN=KLF4 PE=1 SV=3	2	3	3	0.2058	0	1	1	1	630.332	630.332	1888.98	1888.98	-0.87	-0.00055	0/0	0	0	1.70315e+06	HCD	MS2	10.0885	120	94.1942	30089	30089	30079	200821_HELA_MGTG_iNrich_bRP_F04.raw	F1.4	NA	2732	2.77	1	FALSE	0.007178	0.06882	0.038
High	Sequest HT	Sequest HT (A5)	A	5	Unambiguous	DTAPTGHTLR	[F].dTAPTGHTLR.[L]	1	O43681	O43681	ATPase GET3 OS=Homo sapiens OX=9606 GN=GET3 PE=1 SV=2	O43681	ATPase GET3 OS=Homo sapiens OX=9606 GN=GET3 PE=1 SV=2	0	3	3	0.5072	0	1	1	1	423.896	423.896	1269.67	1269.67	0.48	0.0002	0/0	0	0	555716	HCD	MS2	47.5871	54.013	33.8334	8691	8691	8687	220621_E_208.raw	F6.8	NA	1933	2.76	1	FALSE	0.001861	0.0165	0.195
High	Sequest HT	Sequest HT (A5)	A	5	Selected	EALEKTEKQL	[R].eALEkTEkQL.[E]	1	O43707	O43707	Alpha-actinin-4 OS=Homo sapiens OX=9606 GN=ACTN4 PE=1 SV=2	O43707	Alpha-actinin-4 OS=Homo sapiens OX=9606 GN=ACTN4 PE=1 SV=2	0	2	2	0.1359	0	1	1	1	740.424	740.424	1479.84	1479.84	2.76	0.00204	0/0	0	0	2.20042e+06	HCD	MS2	37.6017	96.296	95.4561	29855	29855	29850	200925_HELA_iNrich_bRP_F05.raw	F2.5	NA	1348	2.06	1	FALSE	0.008412	0.08013	0.021
High	Sequest HT	Sequest HT (A5)	A	5	Selected	QFASQANVVGPWIQTKMEEIGR	[R].qFASQANVVGPWIQTkMEEIGR.[I]	1	O43707	O43707	Alpha-actinin-4 OS=Homo sapiens OX=9606 GN=ACTN4 PE=1 SV=2	O43707	Alpha-actinin-4 OS=Homo sapiens OX=9606 GN=ACTN4 PE=1 SV=2	0	3	3	0.4418	0	1	1	1	912.811	912.811	2736.42	2736.4	5.48	0.00499	0/0	0	0	841369	HCD	MS2	28.3081	68.881	124.718	39054	39054	39052	200925_HELA_iNrich_bRP_F07.raw	F2.7	NA	3074	6.27	1	FALSE	9.269e-06	1.886e-07	1.425
High	Sequest HT	Sequest HT (A5)	A	5	Selected	EALEKTEKQL	[R].eALEkTEkQL.[E]	1	O43707	O43707	Alpha-actinin-4 OS=Homo sapiens OX=9606 GN=ACTN4 PE=1 SV=2	O43707	Alpha-actinin-4 OS=Homo sapiens OX=9606 GN=ACTN4 PE=1 SV=2	0	2	2	0.3208	0	1	1	1	740.425	740.425	1479.84	1479.84	4.6	0.00341	0/0	0	0	3.48968e+06	HCD	MS2	0	55.785	82.2081	36173	36173	36169	220621_E_107.raw	F5.7	NA	1256	3.18	1	FALSE	0.001928	0.01705	0.191
High	Sequest HT	Sequest HT (A5)	A	5	Selected	EALEKTEKQL	[R].eALEkTEkQL.[E]	1	O43707	O43707	Alpha-actinin-4 OS=Homo sapiens OX=9606 GN=ACTN4 PE=1 SV=2	O43707	Alpha-actinin-4 OS=Homo sapiens OX=9606 GN=ACTN4 PE=1 SV=2	0	2	2	0.2971	0	1	1	1	740.426	740.426	1479.85	1479.84	6.24	0.00462	0/0	0	0	1.59265e+06	HCD	MS2	33.7053	49.209	82.1044	31883	31883	31874	220621_E_309.raw	F7.9	NA	1230	2.76	1	FALSE	0.00248	0.02199	0.163
High	Sequest HT	Sequest HT (A5)	A	5	Unambiguous	EVRPDTQYTGRK	[R].eVRPDTQYTGRk.[R]	1	O43709	O43709	Probable 18S rRNA (guanine-N(7))-methyltransferase OS=Homo sapiens OX=9606 GN=BUD23 PE=1 SV=2	O43709	Probable 18S rRNA (guanine-N(7))-methyltransferase OS=Homo sapiens OX=9606 GN=BUD23 PE=1 SV=2	1	3	3	0.2892	0	1	1	1	565.973	565.973	1695.9	1695.9	-0.17	-9e-05	0/0	0	0	3.42289e+06	HCD	MS2	39.6487	22.528	43.7117	14645	14645	14641	220621_E_102.raw	F5.2	NA	2318	2.87	1	FALSE	0.001363	0.01216	0.228
High	Sequest HT	Sequest HT (A5)	A	5	Selected	EVRPDTQYTGRK	[R].eVRPDTQYTGRk.[R]	1	O43709	O43709	Probable 18S rRNA (guanine-N(7))-methyltransferase OS=Homo sapiens OX=9606 GN=BUD23 PE=1 SV=2	O43709	Probable 18S rRNA (guanine-N(7))-methyltransferase OS=Homo sapiens OX=9606 GN=BUD23 PE=1 SV=2	1	3	3	0.4756	0	1	1	1	565.972	565.972	1695.9	1695.9	-1.19	-0.00067	0/0	0	0	3588052	HCD	MS2	17.5066	32.361	44.11	14557	14557	14550	220621_E_108.raw	F5.8	NA	2349	3.28	1	FALSE	7.925e-05	0.0004187	0.574
High	Sequest HT	Sequest HT (A5)	A	5	Selected	EVRPDTQYTGRK	[R].eVRPDTQYTGRk.[R]	1	O43709	O43709	Probable 18S rRNA (guanine-N(7))-methyltransferase OS=Homo sapiens OX=9606 GN=BUD23 PE=1 SV=2	O43709	Probable 18S rRNA (guanine-N(7))-methyltransferase OS=Homo sapiens OX=9606 GN=BUD23 PE=1 SV=2	1	3	0	0.4915	0	1	1	1	565.973	565.973	1695.9	1695.9	0.23	0.00013	0/0	0	0	6.70767e+06	HCD	MS2	66.6488	16.186	42.631	14283	14283	14277	220621_E_109.raw	F5.9	NA	2412	3.54	1	FALSE	0.0001144	0.00085	0.498
High	Sequest HT	Sequest HT (A5)	A	5	Selected	EVRPDTQYTGRK	[R].eVRPDTQYTGRk.[R]	1	O43709	O43709	Probable 18S rRNA (guanine-N(7))-methyltransferase OS=Homo sapiens OX=9606 GN=BUD23 PE=1 SV=2	O43709	Probable 18S rRNA (guanine-N(7))-methyltransferase OS=Homo sapiens OX=9606 GN=BUD23 PE=1 SV=2	1	3	3	0.4551	0	1	1	1	565.973	565.973	1695.9	1695.9	-0.3	-0.00017	0/0	0	0	3.7429e+06	HCD	MS2	30.6849	12.551	42.4376	13814	13814	13809	220621_E_209.raw	F6.9	NA	2317	3.34	1	FALSE	1.762e-05	6.077e-05	0.792
High	Sequest HT	Sequest HT (A5)	A	5	Unambiguous	EVRPDTQYTGRK	[R].eVRPDTQYTGRk.[R]	1	O43709	O43709	Probable 18S rRNA (guanine-N(7))-methyltransferase OS=Homo sapiens OX=9606 GN=BUD23 PE=1 SV=2	O43709	Probable 18S rRNA (guanine-N(7))-methyltransferase OS=Homo sapiens OX=9606 GN=BUD23 PE=1 SV=2	1	3	3	0.4814	0	1	1	1	565.972	565.972	1695.9	1695.9	-0.95	-0.00054	0/0	0	0	4.33512e+06	HCD	MS2	28.2885	18.589	44.9494	14526	14526	14524	220621_E_302.raw	F7.2	NA	2350	3.22	1	FALSE	5.203e-05	0.0003095	0.607
High	Sequest HT	Sequest HT (A5)	A	5	Unambiguous	EVRPDTQYTGRK	[R].eVRPDTQYTGRk.[R]	1	O43709	O43709	Probable 18S rRNA (guanine-N(7))-methyltransferase OS=Homo sapiens OX=9606 GN=BUD23 PE=1 SV=2	O43709	Probable 18S rRNA (guanine-N(7))-methyltransferase OS=Homo sapiens OX=9606 GN=BUD23 PE=1 SV=2	1	3	0	0.5296	0	1	1	1	565.973	565.973	1695.9	1695.9	0	0	0/0	0	0	2.8576e+06	HCD	MS2	62.0342	38.038	43.709	13945	13945	13934	220621_E_309.raw	F7.9	NA	2332	3.55	1	FALSE	9.269e-06	2.193e-05	0.906
High	Sequest HT	Sequest HT (A5)	A	5	Selected	EVRPDTQYTGRK	[R].eVRPDTQYTGRk.[R]	1	O43709	O43709	Probable 18S rRNA (guanine-N(7))-methyltransferase OS=Homo sapiens OX=9606 GN=BUD23 PE=1 SV=2	O43709	Probable 18S rRNA (guanine-N(7))-methyltransferase OS=Homo sapiens OX=9606 GN=BUD23 PE=1 SV=2	1	3	3	0.2229	0	1	1	1	565.973	565.973	1695.9	1695.9	-0.1	-6e-05	0/0	0	0	1.70473e+06	HCD	MS2	23.6487	55.881	44.1892	13377	13377	13367	220428_iNrich_HELA_MG132_Trypsin_09.raw	F12.9	NA	2317	3.14	1	FALSE	0.001458	0.01291	0.222
High	Sequest HT	Sequest HT (A5)	A	5	Unambiguous	ELYVSDR	[A].eLYVSDR.[E]	1	O43776	O43776	Asparagine--tRNA ligase, cytoplasmic OS=Homo sapiens OX=9606 GN=NARS1 PE=1 SV=1	O43776	Asparagine--tRNA ligase, cytoplasmic OS=Homo sapiens OX=9606 GN=NARS1 PE=1 SV=1	0	2	2	0.1731	0	1	1	1	541.787	541.787	1082.57	1082.57	0.07	4e-05	0/0	0	0	787188	HCD	MS2	37.0055	119.277	62.0851	15940	15940	15938	200821_HELA_MGTG_iNrich_bRP_F08.raw	F1.8	NA	1721	2.6	1	FALSE	0.0006543	0.005632	0.307
High	Sequest HT	Sequest HT (A5)	A	5	Selected	ESVDVLMPNVGEIVGGSMR	[T].eSVDVLmPNVGEIVGGSMR.[I]	1	O43776	O43776	Asparagine--tRNA ligase, cytoplasmic OS=Homo sapiens OX=9606 GN=NARS1 PE=1 SV=1	O43776	Asparagine--tRNA ligase, cytoplasmic OS=Homo sapiens OX=9606 GN=NARS1 PE=1 SV=1	0	3	3	0.4439	0	1	1	1	736.046	736.046	2206.12	2206.1	8.99	0.00661	0/0	0	0	2.17484e+06	HCD	MS2	27.1235	107.412	116.737	39094	39094	39084	200925_HELA_iNrich_bRP_F04.raw	F2.4	NA	2884	4.28	1	FALSE	0.002233	0.01932	0.177
High	Sequest HT	Sequest HT (A5)	A	5	Unambiguous	NKAKSTCSCPDLQPNGQDLGENSR	[R].nkAkSTcScPDLQPNGQDLGENSR.[V]	1	O43847	O43847	Nardilysin OS=Homo sapiens OX=9606 GN=NRDC PE=1 SV=3	O43847	Nardilysin OS=Homo sapiens OX=9606 GN=NRDC PE=1 SV=3	0	3	3	0.6364	0	1	1	1	990.141	990.141	2968.41	2968.38	8.01	0.00793	0/0	0	0	3.41471e+06	HCD	MS2	24.4833	78.073	59.8985	23505	23505	23494	220621_E_209.raw	F6.9	NoneMonoisotopic	2326	5.61	1	FALSE	9.269e-06	3.638e-07	1.353
High	Sequest HT	Sequest HT (A5)	A	5	Unambiguous	DEPEWVKTER	[T].dEPEWVkTER.[E]	1	O43852	O43852	Calumenin OS=Homo sapiens OX=9606 GN=CALU PE=1 SV=2	O43852	Calumenin OS=Homo sapiens OX=9606 GN=CALU PE=1 SV=2	0	2	2	0.5215	0	1	1	1	767.893	767.893	1534.78	1534.78	0.69	0.00053	0/0	0	0	2.29507e+06	HCD	MS2	7.75112	120	73.6953	21306	21306	21302	200821_HELA_MGTG_iNrich_bRP_F02.raw	F1.2	NA	2408	3.95	1	FALSE	9.269e-06	1.08e-05	0.983
High	Sequest HT	Sequest HT (A5)	A	5	Unambiguous	DEPEWVKTER	[T].dEPEWVkTER.[E]	1	O43852	O43852	Calumenin OS=Homo sapiens OX=9606 GN=CALU PE=1 SV=2	O43852	Calumenin OS=Homo sapiens OX=9606 GN=CALU PE=1 SV=2	0	2	2	0.3831	0	1	1	1	767.893	767.893	1534.78	1534.78	1.22	0.00093	0/0	0	0	5339866	HCD	MS2	53.906	11.914	61.093	24161	24161	24157	220621_E_305.raw	F7.5	NA	2504	2.61	1	FALSE	0.0003767	0.002988	0.37
High	Sequest HT	Sequest HT (A5)	A	5	Unambiguous	EAAANTNRP	[R].eAAANTNRP.[S]	1	O60356	O60356	Nuclear protein 1 OS=Homo sapiens OX=9606 GN=NUPR1 PE=1 SV=1	O60356	Nuclear protein 1 OS=Homo sapiens OX=9606 GN=NUPR1 PE=1 SV=1	0	2	2	0.25	0	1	1	1	572.798	572.796	1144.59	1144.59	-1.47	-0.00084	0/0	0	0	1.39279e+06	HCD	MS2	25.0461	120	29.0888	7539	7539	7530	220621_E_201.raw	F6.1	NA	1921	2.84	1	FALSE	0.0006309	0.005415	0.311
High	Sequest HT	Sequest HT (A5)	A	5	Unambiguous	DPVAAETAAQGPTPR	[P].dPVAAETAAQGPTPR.[Y]	1	O60427	O60427	Acyl-CoA (8-3)-desaturase OS=Homo sapiens OX=9606 GN=FADS1 PE=1 SV=3	O60427	Acyl-CoA (8-3)-desaturase OS=Homo sapiens OX=9606 GN=FADS1 PE=1 SV=3	0	2	2	0.5327	0	1	1	1	841.438	841.438	1681.87	1681.87	-0.56	-0.00047	0/0	0	0	4.03106e+06	HCD	MS2	6.72031	26.481	64.0041	16068	16068	16064	200821_HELA_MGTG_iNrich_bRP_F05.raw	F1.5	NA	2533	3.36	1	FALSE	9.269e-06	7.296e-07	1.277
High	Sequest HT	Sequest HT (A5)	A	5	Selected	DPVAAETAAQGPTPR	[P].dPVAAETAAQGPTPR.[Y]	1	O60427	O60427	Acyl-CoA (8-3)-desaturase OS=Homo sapiens OX=9606 GN=FADS1 PE=1 SV=3	O60427	Acyl-CoA (8-3)-desaturase OS=Homo sapiens OX=9606 GN=FADS1 PE=1 SV=3	0	3	3	0.5115	0	1	1	1	561.294	561.294	1681.87	1681.87	-1.08	-0.0006	0/0	0	0	7616651	HCD	MS2	63.4769	10.471	64.0499	16087	16087	16077	200821_HELA_MGTG_iNrich_bRP_F05.raw	F1.5	NA	2555	4.79	1	FALSE	9.269e-06	1.072e-07	1.486
High	Sequest HT	Sequest HT (A5)	A	5	Unambiguous	DPVAAETAAQGPTPR	[P].dPVAAETAAQGPTPR.[Y]	1	O60427	O60427	Acyl-CoA (8-3)-desaturase OS=Homo sapiens OX=9606 GN=FADS1 PE=1 SV=3	O60427	Acyl-CoA (8-3)-desaturase OS=Homo sapiens OX=9606 GN=FADS1 PE=1 SV=3	0	2	2	0.5392	0	1	1	1	841.437	841.437	1681.87	1681.87	-2.17	-0.00183	0/0	0	0	4.15394e+06	HCD	MS2	28.7863	58.158	65.9876	16539	16539	16534	200925_HELA_iNrich_bRP_F05.raw	F2.5	NA	2485	4.08	1	FALSE	9.269e-06	1.545e-08	1.697
High	Sequest HT	Sequest HT (A5)	A	5	Selected	DPVAAETAAQGPTPR	[P].dPVAAETAAQGPTPR.[Y]	1	O60427	O60427	Acyl-CoA (8-3)-desaturase OS=Homo sapiens OX=9606 GN=FADS1 PE=1 SV=3	O60427	Acyl-CoA (8-3)-desaturase OS=Homo sapiens OX=9606 GN=FADS1 PE=1 SV=3	0	3	3	0.4296	0	1	1	1	561.296	561.296	1681.87	1681.87	2.25	0.00126	0/0	0	0	13580966	HCD	MS2	28.0408	5.268	66.0121	16550	16550	16547	200925_HELA_iNrich_bRP_F05.raw	F2.5	NA	2452	4.33	1	FALSE	9.269e-06	1.359e-05	0.958
High	Sequest HT	Sequest HT (A5)	A	5	Selected	DPVAAETAAQGPTPR	[P].dPVAAETAAQGPTPR.[Y]	1	O60427	O60427	Acyl-CoA (8-3)-desaturase OS=Homo sapiens OX=9606 GN=FADS1 PE=1 SV=3	O60427	Acyl-CoA (8-3)-desaturase OS=Homo sapiens OX=9606 GN=FADS1 PE=1 SV=3	0	3	3	0.3894	0	1	1	1	561.295	561.295	1681.87	1681.87	0.14	8e-05	0/0	0	0	1.78781e+06	HCD	MS2	66.3073	49.2	66.8712	16382	16382	16374	200925_HELA_iNrich_bRP_F06.raw	F2.6	NA	2469	3.57	1	FALSE	9.269e-06	1.559e-06	1.195
High	Sequest HT	Sequest HT (A5)	A	5	Unambiguous	DPVAAETAAQGPTPR	[P].dPVAAETAAQGPTPR.[Y]	1	O60427	O60427	Acyl-CoA (8-3)-desaturase OS=Homo sapiens OX=9606 GN=FADS1 PE=1 SV=3	O60427	Acyl-CoA (8-3)-desaturase OS=Homo sapiens OX=9606 GN=FADS1 PE=1 SV=3	0	2	2	0.4545	0	1	1	1	841.438	841.438	1681.87	1681.87	-0.36	-0.0003	0/0	0	0	1.47477e+06	HCD	MS2	0	120	66.8738	16383	16383	16374	200925_HELA_iNrich_bRP_F06.raw	F2.6	NA	2487	2.86	1	FALSE	9.269e-06	7.814e-06	1.019
High	Sequest HT	Sequest HT (A5)	A	5	Unambiguous	DPVAAETAAQGPTPR	[P].dPVAAETAAQGPTPR.[Y]	1	O60427	O60427	Acyl-CoA (8-3)-desaturase OS=Homo sapiens OX=9606 GN=FADS1 PE=1 SV=3	O60427	Acyl-CoA (8-3)-desaturase OS=Homo sapiens OX=9606 GN=FADS1 PE=1 SV=3	0	2	2	0.5727	0	1	1	1	841.437	841.437	1681.87	1681.87	-1.11	-0.00093	0/0	0	0	9334655	HCD	MS2	0	27.368	50.7401	19169	19169	19165	220621_E_106.raw	F5.6	NA	2539	4.54	1	FALSE	9.269e-06	8.238e-09	1.766
High	Sequest HT	Sequest HT (A5)	A	5	Selected	DPVAAETAAQGPTPR	[P].dPVAAETAAQGPTPR.[Y]	1	O60427	O60427	Acyl-CoA (8-3)-desaturase OS=Homo sapiens OX=9606 GN=FADS1 PE=1 SV=3	O60427	Acyl-CoA (8-3)-desaturase OS=Homo sapiens OX=9606 GN=FADS1 PE=1 SV=3	0	3	3	0.4379	0	1	1	1	561.294	561.294	1681.87	1681.87	-0.82	-0.00046	0/0	0	0	13758273	HCD	MS2	0	7.469	50.8008	19207	19207	19204	220621_E_106.raw	F5.6	NA	2539	4.91	1	FALSE	9.269e-06	1.427e-08	1.706
High	Sequest HT	Sequest HT (A5)	A	5	Selected	ETAAQGPTPR	[A].eTAAQGPTPR.[Y]	1	O60427	O60427	Acyl-CoA (8-3)-desaturase OS=Homo sapiens OX=9606 GN=FADS1 PE=1 SV=3	O60427	Acyl-CoA (8-3)-desaturase OS=Homo sapiens OX=9606 GN=FADS1 PE=1 SV=3	0	2	2	0.2716	0	1	1	1	614.829	614.828	1228.65	1228.65	2.37	0.00145	0/0	0	0	501080	HCD	MS2	21.6299	120	33.0418	8660	8660	8648	220621_E_203.raw	F6.3	NA	1906	2.43	1	FALSE	0.002848	0.02529	0.147
High	Sequest HT	Sequest HT (A5)	A	5	Selected	DPVAAETAAQGPTPR	[P].dPVAAETAAQGPTPR.[Y]	1	O60427	O60427	Acyl-CoA (8-3)-desaturase OS=Homo sapiens OX=9606 GN=FADS1 PE=1 SV=3	O60427	Acyl-CoA (8-3)-desaturase OS=Homo sapiens OX=9606 GN=FADS1 PE=1 SV=3	0	2	2	0.5121	0	1	1	1	841.443	841.442	1681.88	1681.87	4.88	0.00411	0/0	0	0	10327876	HCD	MS2	6.80142	9.563	50.3643	19376	19376	19373	220621_E_206.raw	F6.6	NA	2474	3.3	1	FALSE	1.762e-05	6.04e-05	0.793
High	Sequest HT	Sequest HT (A5)	A	5	Unambiguous	DPVAAETAAQGPTPR	[P].dPVAAETAAQGPTPR.[Y]	1	O60427	O60427	Acyl-CoA (8-3)-desaturase OS=Homo sapiens OX=9606 GN=FADS1 PE=1 SV=3	O60427	Acyl-CoA (8-3)-desaturase OS=Homo sapiens OX=9606 GN=FADS1 PE=1 SV=3	0	2	2	0.5427	0	1	1	1	841.438	841.438	1681.87	1681.87	-0.7	-0.00058	0/0	0	0	10014861	HCD	MS2	0	24.837	51.9805	19157	19157	19152	220621_E_207.raw	F6.7	NA	2552	4.57	1	FALSE	9.269e-06	4.261e-08	1.587
High	Sequest HT	Sequest HT (A5)	A	5	Selected	DPVAAETAAQGPTPR	[P].dPVAAETAAQGPTPR.[Y]	1	O60427	O60427	Acyl-CoA (8-3)-desaturase OS=Homo sapiens OX=9606 GN=FADS1 PE=1 SV=3	O60427	Acyl-CoA (8-3)-desaturase OS=Homo sapiens OX=9606 GN=FADS1 PE=1 SV=3	0	3	3	0.4667	0	1	1	1	561.294	561.294	1681.87	1681.87	-1.47	-0.00082	0/0	0	0	10169522	HCD	MS2	9.94664	8.566	51.9997	19169	19169	19165	220621_E_207.raw	F6.7	NA	2561	4.8	1	FALSE	9.269e-06	1.621e-06	1.19
High	Sequest HT	Sequest HT (A5)	A	5	Selected	DPVAAETAAQGPTPR	[P].dPVAAETAAQGPTPR.[Y]	1	O60427	O60427	Acyl-CoA (8-3)-desaturase OS=Homo sapiens OX=9606 GN=FADS1 PE=1 SV=3	O60427	Acyl-CoA (8-3)-desaturase OS=Homo sapiens OX=9606 GN=FADS1 PE=1 SV=3	0	3	3	0.3243	0	1	1	1	561.294	561.294	1681.87	1681.87	-1.26	-0.00071	0/0	0	0	25696006	HCD	MS2	46.5943	16.935	52.1775	19281	19281	19269	220621_E_207.raw	F6.7	NA	2488	5.15	1	FALSE	9.269e-06	8.027e-06	1.016
High	Sequest HT	Sequest HT (A5)	A	5	Unambiguous	DPVAAETAAQGPTPR	[P].dPVAAETAAQGPTPR.[Y]	1	O60427	O60427	Acyl-CoA (8-3)-desaturase OS=Homo sapiens OX=9606 GN=FADS1 PE=1 SV=3	O60427	Acyl-CoA (8-3)-desaturase OS=Homo sapiens OX=9606 GN=FADS1 PE=1 SV=3	0	2	2	0.5426	0	1	1	1	841.438	841.438	1681.87	1681.87	0.07	6e-05	0/0	0	0	3.1537e+06	HCD	MS2	0	65.571	51.6983	18453	18453	18450	220621_E_306.raw	F7.6	NA	2449	4.11	1	FALSE	9.269e-06	9.429e-08	1.5
High	Sequest HT	Sequest HT (A5)	A	5	Selected	DPVAAETAAQGPTPR	[P].dPVAAETAAQGPTPR.[Y]	1	O60427	O60427	Acyl-CoA (8-3)-desaturase OS=Homo sapiens OX=9606 GN=FADS1 PE=1 SV=3	O60427	Acyl-CoA (8-3)-desaturase OS=Homo sapiens OX=9606 GN=FADS1 PE=1 SV=3	0	3	3	0.429	0	1	1	1	561.294	561.294	1681.87	1681.87	-1.06	-0.00059	0/0	0	0	10641031	HCD	MS2	33.3071	6.365	51.7424	18478	18478	18476	220621_E_306.raw	F7.6	NA	2538	3.17	1	FALSE	9.269e-06	3.824e-05	0.844
High	Sequest HT	Sequest HT (A5)	A	5	Unambiguous	DPVAAETAAQGPTPR	[P].dPVAAETAAQGPTPR.[Y]	1	O60427	O60427	Acyl-CoA (8-3)-desaturase OS=Homo sapiens OX=9606 GN=FADS1 PE=1 SV=3	O60427	Acyl-CoA (8-3)-desaturase OS=Homo sapiens OX=9606 GN=FADS1 PE=1 SV=3	0	2	2	0.5262	0	1	1	1	841.438	841.439	1681.87	1681.87	-0.14	-0.00011	0/0	0	0	559735	HCD	MS2	0	120	51.8963	17728	17728	17722	220621_E_307.raw	F7.7	NA	2450	3.25	1	FALSE	3.982e-05	9.721e-05	0.739
High	Sequest HT	Sequest HT (A5)	A	5	Selected	DPVAAETAAQGPTPR	[P].dPVAAETAAQGPTPR.[Y]	1	O60427	O60427	Acyl-CoA (8-3)-desaturase OS=Homo sapiens OX=9606 GN=FADS1 PE=1 SV=3	O60427	Acyl-CoA (8-3)-desaturase OS=Homo sapiens OX=9606 GN=FADS1 PE=1 SV=3	0	3	3	0.4928	0	1	1	1	561.295	561.295	1681.87	1681.87	0.25	0.00014	0/0	0	0	3.11095e+06	HCD	MS2	7.37401	29.265	51.9662	17764	17764	17761	220621_E_307.raw	F7.7	NA	2495	4.85	1	FALSE	9.269e-06	5.875e-09	1.803
High	Sequest HT	Sequest HT (A5)	A	5	Unambiguous	DPVAAETAAQGPTPR	[P].dPVAAETAAQGPTPR.[Y]	1	O60427	O60427	Acyl-CoA (8-3)-desaturase OS=Homo sapiens OX=9606 GN=FADS1 PE=1 SV=3	O60427	Acyl-CoA (8-3)-desaturase OS=Homo sapiens OX=9606 GN=FADS1 PE=1 SV=3	0	2	2	0.542	0	1	1	1	841.438	841.437	1681.87	1681.87	-0.93	-0.00078	0/0	0	0	2.76142e+06	HCD	MS2	0	83.489	50.1694	16841	16841	16838	220428_iNrich_HELA_MG132_Trypsin_06.raw	F12.6	NA	2504	4.17	1	FALSE	9.269e-06	1.313e-08	1.715
High	Sequest HT	Sequest HT (A5)	A	5	Unambiguous	QGLEQFINKVAGHPLAQNER	[K].qGLEQFINkVAGHPLAQNER.[C]	1	O60493	O60493	Sorting nexin-3 OS=Homo sapiens OX=9606 GN=SNX3 PE=1 SV=3	O60493	Sorting nexin-3 OS=Homo sapiens OX=9606 GN=SNX3 PE=1 SV=3	0	3	3	0.5469	0	1	1	1	832.784	832.784	2496.34	2496.32	6.22	0.00518	0/0	0	0	664038	HCD	MS2	44.2591	120	123.21	42182	42182	42174	200821_HELA_MGTG_iNrich_bRP_F08.raw	F1.8	NoneMonoisotopic	2497	5.54	1	FALSE	9.269e-06	1.438e-07	1.454
High	Sequest HT	Sequest HT (A5)	A	5	Unambiguous	QVEDLQATFSSIHSFQDLSSSILAQSR	[R].qVEDLQATFSSIHSFQDLSSSILAQSR.[E]	1	O60664	O60664	Perilipin-3 OS=Homo sapiens OX=9606 GN=PLIN3 PE=1 SV=3	O60664	Perilipin-3 OS=Homo sapiens OX=9606 GN=PLIN3 PE=1 SV=3	0	4	4	0.5071	0	1	1	1	799.91	799.91	3196.62	3196.59	6.84	0.00547	0/0	0	0	293885	HCD	MS2	32.1583	120	122.103	40954	40954	40943	200821_HELA_MGTG_iNrich_bRP_F09.raw	F1.9	NA	3622	4.2	1	FALSE	9.269e-06	1.484e-05	0.949
High	Sequest HT	Sequest HT (A5)	A	5	Unambiguous	EPAKSAPAPKKGSKKAVTKAQKKDGKKR	[P].ePAkSAPAPkkGSkkAVTkAQkkDGkkR.[K]	4	Q16778	Q16778	Histone H2B type 2-E OS=Homo sapiens OX=9606 GN=H2BC21 PE=1 SV=3	Q16778; O60814; P62807; P06899	Histone H2B type 2-E OS=Homo sapiens OX=9606 GN=H2BC21 PE=1 SV=3; Histone H2B type 1-K OS=Homo sapiens OX=9606 GN=H2BC12 PE=1 SV=3; Histone H2B type 1-C/E/F/G/I OS=Homo sapiens OX=9606 GN=H2BC10 PE=1 SV=4; Histone H2B type 1-J OS=Homo sapiens OX=9606 GN=H2BC11 PE=1 SV=3	0	3	0	0.603	0	1	1	1	1205.4	1205.4	3614.17	3614.19	-4.34	-0.00523	0/0	0	0	7.62007e+06	HCD	MS2	57.3448	47.804	81.049	35947	35947	35935	220621_E_102.raw	F5.2	NA	83	4.03	1	FALSE	0.0001871	0.00131	0.454
High	Sequest HT	Sequest HT (A5)	A	5	Unambiguous	DDAKKQTPKQR	[D].dDAkkQTPkQR.[L]	1	O75369	O75369	Filamin-B OS=Homo sapiens OX=9606 GN=FLNB PE=1 SV=2	O75369	Filamin-B OS=Homo sapiens OX=9606 GN=FLNB PE=1 SV=2	0	2	2	0.5213	0	1	1	1	825.969	825.969	1650.93	1650.93	0.3	0.00024	0/0	0	0	732823	HCD	MS2	0	120	53.4984	12443	12443	12431	200821_HELA_MGTG_iNrich_bRP_F03.raw	F1.3	NA	1423	3.28	1	FALSE	9.269e-06	8.735e-06	1.007
High	Sequest HT	Sequest HT (A5)	A	5	Selected	ETDLSSLTASIKAPSGRDEPCLLKR	[S].eTDLSSLTASIkAPSGRDEPcLLkR.[L]	1	O75369	O75369	Filamin-B OS=Homo sapiens OX=9606 GN=FLNB PE=1 SV=2	O75369	Filamin-B OS=Homo sapiens OX=9606 GN=FLNB PE=1 SV=2	1	3	3	0.1845	0	1	1	1	1012.53	1012.53	3035.59	3035.61	-9.03	-0.00914	0/0	0	0	2.75799e+06	HCD	MS2	27.019	76.76	106.149	35255	35255	35243	200925_HELA_iNrich_bRP_F01.raw	F2.1	NA	3209	2.33	1	FALSE	0.003146	0.02763	0.137
High	Sequest HT	Sequest HT (A5)	A	5	Selected	DDAKKQTPKQR	[D].dDAkkQTPkQR.[L]	1	O75369	O75369	Filamin-B OS=Homo sapiens OX=9606 GN=FLNB PE=1 SV=2	O75369	Filamin-B OS=Homo sapiens OX=9606 GN=FLNB PE=1 SV=2	0	2	2	0.5178	0	1	1	1	825.969	825.969	1650.93	1650.93	0.25	0.00021	0/0	0	0	10962523	HCD	MS2	6.82873	25.534	40.8032	13594	13594	13588	220621_E_204.raw	F6.4	NA	1418	3.94	1	FALSE	9.269e-06	7.04e-07	1.281
High	Sequest HT	Sequest HT (A5)	A	5	Selected	DDAKKQTPKQR	[D].dDAkkQTPkQR.[L]	1	O75369	O75369	Filamin-B OS=Homo sapiens OX=9606 GN=FLNB PE=1 SV=2	O75369	Filamin-B OS=Homo sapiens OX=9606 GN=FLNB PE=1 SV=2	0	2	2	0.4884	0	1	1	1	825.97	825.97	1650.93	1650.93	0.61	0.00051	0/0	0	0	15851382	HCD	MS2	22.681	7.132	40.9302	13675	13675	13666	220621_E_204.raw	F6.4	NA	1401	3.46	1	FALSE	3.982e-05	0.0002263	0.642
High	Sequest HT	Sequest HT (A5)	A	5	Selected	DDAKKQTPKQR	[D].dDAkkQTPkQR.[L]	1	O75369	O75369	Filamin-B OS=Homo sapiens OX=9606 GN=FLNB PE=1 SV=2	O75369	Filamin-B OS=Homo sapiens OX=9606 GN=FLNB PE=1 SV=2	0	2	2	0.4899	0	1	1	1	825.969	825.968	1650.93	1650.93	-0.32	-0.00026	0/0	0	0	511924	HCD	MS2	18.3973	120	41.8918	13560	13560	13549	220621_E_304.raw	F7.4	NA	1381	2.98	1	FALSE	3.982e-05	0.0001203	0.714
High	Sequest HT	Sequest HT (A5)	A	5	Selected	DDAKKQTPKQR	[D].dDAkkQTPkQR.[L]	1	O75369	O75369	Filamin-B OS=Homo sapiens OX=9606 GN=FLNB PE=1 SV=2	O75369	Filamin-B OS=Homo sapiens OX=9606 GN=FLNB PE=1 SV=2	0	3	0	0.479	0	1	1	1	550.982	550.982	1650.93	1650.93	0.18	0.0001	0/0	0	0	4.84013e+06	HCD	MS2	75.8779	12.004	41.9428	13583	13583	13575	220621_E_304.raw	F7.4	NA	1411	2.86	1	FALSE	9.666e-05	0.0005968	0.536
High	Sequest HT	Sequest HT (A5)	A	5	Selected	DDAKKQTPKQR	[D].dDAkkQTPkQR.[L]	1	O75369	O75369	Filamin-B OS=Homo sapiens OX=9606 GN=FLNB PE=1 SV=2	O75369	Filamin-B OS=Homo sapiens OX=9606 GN=FLNB PE=1 SV=2	0	3	3	0.4846	0	1	1	1	550.982	550.981	1650.93	1650.93	-0.56	-0.00031	0/0	0	0	1.02144e+06	HCD	MS2	26.1602	47.103	42.4395	13830	13830	13822	220621_E_304.raw	F7.4	NA	1419	2.93	1	FALSE	0.0002752	0.001944	0.413
High	Sequest HT	Sequest HT (A5)	A	5	Unambiguous	DDAKKQTPKQR	[D].dDAkkQTPkQR.[L]	1	O75369	O75369	Filamin-B OS=Homo sapiens OX=9606 GN=FLNB PE=1 SV=2	O75369	Filamin-B OS=Homo sapiens OX=9606 GN=FLNB PE=1 SV=2	0	2	2	0.3786	0	1	1	1	825.968	825.968	1650.93	1650.93	-1.24	-0.00102	0/0	0	0	1.0131e+06	HCD	MS2	0	120	42.6007	13905	13905	13900	220621_E_304.raw	F7.4	NA	1397	2.43	1	FALSE	0.0001248	0.0009639	0.485
High	Sequest HT	Sequest HT (A5)	A	5	Unambiguous	EVGKDQEFTVDTR	[V].eVGkDQEFTVDTR.[G]	1	O75369	O75369	Filamin-B OS=Homo sapiens OX=9606 GN=FLNB PE=1 SV=2	O75369	Filamin-B OS=Homo sapiens OX=9606 GN=FLNB PE=1 SV=2	0	2	2	0.4273	0	1	1	1	885.452	885.452	1769.9	1769.89	1.67	0.00147	0/0	0	0	5376874	HCD	MS2	46.295	55.202	87.4015	37789	37789	37781	220621_E_305.raw	F7.5	NA	2560	3.3	1	FALSE	0.0002752	0.001923	0.414
High	Sequest HT	Sequest HT (A5)	A	5	Unambiguous	DDAKKQTPKQR	[D].dDAkkQTPkQR.[L]	1	O75369	O75369	Filamin-B OS=Homo sapiens OX=9606 GN=FLNB PE=1 SV=2	O75369	Filamin-B OS=Homo sapiens OX=9606 GN=FLNB PE=1 SV=2	0	3	3	0.4872	0	1	1	1	550.982	550.982	1650.93	1650.93	-0.22	-0.00012	0/0	0	0	1.35354e+06	HCD	MS2	44.8802	61.567	42.4246	12576	12576	12574	220428_iNrich_HELA_MG132_Trypsin_03.raw	F12.3	NA	1386	3.9	1	FALSE	9.666e-05	0.0005412	0.546
High	Sequest HT	Sequest HT (A5)	A	5	Unambiguous	DDAKKQTPKQR	[D].dDAkkQTPkQR.[L]	1	O75369	O75369	Filamin-B OS=Homo sapiens OX=9606 GN=FLNB PE=1 SV=2	O75369	Filamin-B OS=Homo sapiens OX=9606 GN=FLNB PE=1 SV=2	0	3	3	0.3706	0	1	1	1	550.982	550.982	1650.93	1650.93	0.97	0.00053	0/0	0	0	3.54467e+06	HCD	MS2	36.3558	19.69	42.6347	12700	12700	12691	220428_iNrich_HELA_MG132_Trypsin_04.raw	F12.4	NA	1394	3.4	1	FALSE	3.982e-05	0.0001779	0.669
High	Sequest HT	Sequest HT (A5)	A	5	Unambiguous	EDEGDDDAKKQTPKQR	[W].eDEGDDDAkkQTPkQR.[L]	1	O75369	O75369	Filamin-B OS=Homo sapiens OX=9606 GN=FLNB PE=1 SV=2	O75369	Filamin-B OS=Homo sapiens OX=9606 GN=FLNB PE=1 SV=2	0	3	3	0.5131	0	1	1	1	732.7	732.7	2196.08	2196.09	-3.05	-0.00223	0/0	0	0	979674	HCD	MS2	14.0691	120	50.9916	16352	16352	16344	220428_iNrich_HELA_MG132_Trypsin_11.raw	F12.11	NA	2872	2.67	1	FALSE	0.0003025	0.002259	0.398
High	Sequest HT	Sequest HT (A5)	A	5	Unambiguous	DGLPLAASMQEDEQSGRDLQQYQSQAKQLFR	[A].dGLPLAASmQEDEQSGRDLQQYQSQAkQLFR.[K]	1	O75396	O75396	Vesicle-trafficking protein SEC22b OS=Homo sapiens OX=9606 GN=SEC22B PE=1 SV=5	O75396	Vesicle-trafficking protein SEC22b OS=Homo sapiens OX=9606 GN=SEC22B PE=1 SV=5	1	3	3	0.3785	0	1	1	1	1267.29	1267.29	3799.85	3799.86	-2.01	-0.00255	0/0	0	0	1.30002e+06	HCD	MS2	59.5461	120	123.232	42807	42807	42799	200925_HELA_iNrich_bRP_F10.raw	F2.10	NA	3343	2.88	1	FALSE	0.0002887	0.002032	0.409
High	Sequest HT	Sequest HT (A5)	A	5	Unambiguous	DGLPLAASMQEDEQSGRDLQQYQSQAKQLFR	[A].dGLPLAASmQEDEQSGRDLQQYQSQAkQLFR.[K]	1	O75396	O75396	Vesicle-trafficking protein SEC22b OS=Homo sapiens OX=9606 GN=SEC22B PE=1 SV=5	O75396	Vesicle-trafficking protein SEC22b OS=Homo sapiens OX=9606 GN=SEC22B PE=1 SV=5	1	3	3	0.3055	0	1	1	1	1267.29	1267.29	3799.86	3799.86	1.94	0.00246	0/0	0	0	3.16571e+06	HCD	MS2	28.011	120	123.357	42859	42859	42851	200925_HELA_iNrich_bRP_F10.raw	F2.10	NA	3505	2.75	1	FALSE	3.982e-05	8.967e-05	0.748
High	Sequest HT	Sequest HT (A5)	A	5	Unambiguous	NIEEVLQR	[A].nIEEVLQR.[G]	1	O75396	O75396	Vesicle-trafficking protein SEC22b OS=Homo sapiens OX=9606 GN=SEC22B PE=1 SV=5	O75396	Vesicle-trafficking protein SEC22b OS=Homo sapiens OX=9606 GN=SEC22B PE=1 SV=5	0	2	2	0.1397	0	1	1	1	601.833	601.833	1202.66	1202.66	1.62	0.00097	0/0	0	0	2.83994e+06	HCD	MS2	43.9227	82.726	71.4891	31002	31002	30995	220621_E_202.raw	F6.2	NA	2044	2.29	1	FALSE	0.003831	0.03384	0.114
High	Sequest HT	Sequest HT (A5)	A	5	Selected	NIEEVLQR	[A].nIEEVLQR.[G]	1	O75396	O75396	Vesicle-trafficking protein SEC22b OS=Homo sapiens OX=9606 GN=SEC22B PE=1 SV=5	O75396	Vesicle-trafficking protein SEC22b OS=Homo sapiens OX=9606 GN=SEC22B PE=1 SV=5	0	2	2	0.287	0	1	1	1	601.832	601.832	1202.66	1202.66	0.32	0.00019	0/0	0	0	1.80318e+06	HCD	MS2	24.9172	55.934	69.9607	26760	26760	26757	220428_iNrich_HELA_MG132_Trypsin_01.raw	F12.1	NA	1978	3.45	1	FALSE	7.925e-05	0.0004318	0.571
High	Sequest HT	Sequest HT (A5)	A	5	Selected	QTVYYAKAFSKDLPR	[E].qTVYYAkAFSkDLPR.[A]	1	O75439	O75439	Mitochondrial-processing peptidase subunit beta OS=Homo sapiens OX=9606 GN=PMPCB PE=1 SV=2	O75439	Mitochondrial-processing peptidase subunit beta OS=Homo sapiens OX=9606 GN=PMPCB PE=1 SV=2	0	2	2	0.4404	0	1	1	1	1040.06	1040.06	2079.11	2079.12	-7.97	-0.00828	0/0	0	0	808220	HCD	MS2	53.8894	120	129.609	40930	40930	40924	200925_HELA_iNrich_bRP_F07.raw	F2.7	NoneMonoisotopic	2430	3.02	1	FALSE	0.001324	0.01158	0.233
High	Sequest HT	Sequest HT (A5)	A	5	Selected	EPDKKEGKKEVESKR	[K].ePDkkEGkkEVESkR.[K]	1	O75475	O75475	PC4 and SFRS1-interacting protein OS=Homo sapiens OX=9606 GN=PSIP1 PE=1 SV=1	O75475	PC4 and SFRS1-interacting protein OS=Homo sapiens OX=9606 GN=PSIP1 PE=1 SV=1	0	3	3	0.4857	0	1	1	1	738.415	738.415	2213.23	2213.24	-5.23	-0.00386	0/0	0	0	2.40513e+06	HCD	MS2	13.6192	116.22	85.5866	26314	26314	26309	200821_HELA_MGTG_iNrich_bRP_F11.raw	F1.11	NA	1609	4.2	1	FALSE	9.269e-06	2.865e-05	0.876
High	Sequest HT	Sequest HT (B5)	B	5	Selected	EAKQAKNPASPY	[L].eAkQAkNPASPY.[N]	1	O75787	O75787	Renin receptor OS=Homo sapiens OX=9606 GN=ATP6AP2 PE=1 SV=2	O75787	Renin receptor OS=Homo sapiens OX=9606 GN=ATP6AP2 PE=1 SV=2	0	2	2	0.3682	0	1	1	1	797.933	797.934	1594.86	1594.85	3.2	0.00255	0/0	0	0	1.57505e+06	HCD	MS2	26.422	113.681	59.6604	23108	23108	23104	220621_E_509.raw	F9.9	NA	3894	2.39	1	FALSE	0.002319	0.01004	0.184
High	Sequest HT	Sequest HT (A5)	A	5	Selected	EAEKSQLIMQAEAEAASVR	[A].eAEkSQLIMQAEAEAASVR.[M]	1	O75955	O75955	Flotillin-1 OS=Homo sapiens OX=9606 GN=FLOT1 PE=1 SV=3	O75955	Flotillin-1 OS=Homo sapiens OX=9606 GN=FLOT1 PE=1 SV=3	0	3	3	0.1662	0	1	1	1	769.73	769.73	2307.18	2307.19	-5.1	-0.00393	0/0	0	0	2.92491e+06	HCD	MS2	57.9415	95.043	112.374	37933	37933	37922	200925_HELA_iNrich_bRP_F01.raw	F2.1	NoneMonoisotopic	3020	3.25	1	FALSE	0.004286	0.03851	0.1
High	Sequest HT	Sequest HT (A5)	A	5	Selected	EVESVGKVVQEDGR	[G].eVESVGkVVQEDGR.[M]	1	O94829	O94829	Importin-13 OS=Homo sapiens OX=9606 GN=IPO13 PE=1 SV=3	O94829	Importin-13 OS=Homo sapiens OX=9606 GN=IPO13 PE=1 SV=3	0	2	2	0.3319	0	1	1	1	888.968	888.968	1776.93	1776.94	-3.45	-0.00307	0/0	0	0	575567	HCD	MS2	57.3129	120	79.2372	30480	30480	30475	220428_iNrich_HELA_MG132_Trypsin_06.raw	F12.6	NA	2662	2.35	1	FALSE	0.002418	0.02147	0.165
High	Sequest HT	Sequest HT (A5)	A	5	Selected	EDLKNNESQWKDSPLATR	[V].eDLkNNESQWkDSPLATR.[H]	1	O95155	O95155	Ubiquitin conjugation factor E4 B OS=Homo sapiens OX=9606 GN=UBE4B PE=1 SV=1	O95155	Ubiquitin conjugation factor E4 B OS=Homo sapiens OX=9606 GN=UBE4B PE=1 SV=1	0	3	3	0.413	0	1	1	1	808.076	808.076	2422.21	2422.23	-7.14	-0.00577	0/0	0	0	1.70046e+06	HCD	MS2	64.0355	120	94.0013	29921	29921	29912	200821_HELA_MGTG_iNrich_bRP_F11.raw	F1.11	NA	3084	3.68	1	FALSE	0.001066	0.009478	0.254
High	Sequest HT	Sequest HT (A5)	A	5	Unambiguous	EDALAEAQRVNTKSQSAFDLKKKNLACEESKR	[L].eDALAEAQRVNTkSQSAFDLkkkNLAcEESkR.[K]	1	O95347	O95347	Structural maintenance of chromosomes protein 2 OS=Homo sapiens OX=9606 GN=SMC2 PE=1 SV=2	O95347	Structural maintenance of chromosomes protein 2 OS=Homo sapiens OX=9606 GN=SMC2 PE=1 SV=2	1	4	4	0.6192	0	1	1	1	1023.54	1023.54	4091.15	4091.15	1.52	0.00155	0/0	0	0	1.23582e+06	HCD	MS2	14.1321	120	118.072	39379	39379	39370	200821_HELA_MGTG_iNrich_bRP_F09.raw	F1.9	NA	3061	4.49	1	FALSE	9.269e-06	2.821e-05	0.878
High	Sequest HT	Sequest HT (A5)	A	5	Unambiguous	EDALAEAQRVNTKSQSAFDLKKKNLACEESKR	[L].eDALAEAQRVNTkSQSAFDLkkkNLAcEESkR.[K]	1	O95347	O95347	Structural maintenance of chromosomes protein 2 OS=Homo sapiens OX=9606 GN=SMC2 PE=1 SV=2	O95347	Structural maintenance of chromosomes protein 2 OS=Homo sapiens OX=9606 GN=SMC2 PE=1 SV=2	1	4	4	0.6841	0	1	1	1	1023.54	1023.54	4091.13	4091.15	-3.68	-0.00377	0/0	0	0	2.26989e+06	HCD	MS2	0	73.71	119.322	40779	40779	40777	200925_HELA_iNrich_bRP_F09.raw	F2.9	NA	3400	6.87	1	FALSE	9.269e-06	3.681e-08	1.603
High	Sequest HT	Sequest HT (A5)	A	5	Selected	NVLTEAEER	[M].nVLTEAEER.[Y]	1	O95347	O95347	Structural maintenance of chromosomes protein 2 OS=Homo sapiens OX=9606 GN=SMC2 PE=1 SV=2	O95347	Structural maintenance of chromosomes protein 2 OS=Homo sapiens OX=9606 GN=SMC2 PE=1 SV=2	0	2	2	0.2349	0	1	1	1	631.825	631.825	1262.64	1262.64	0.64	0.0004	0/0	0	0	1.14828e+06	HCD	MS2	0	120	59.2237	21174	21174	21167	220428_iNrich_HELA_MG132_Trypsin_02.raw	F12.2	NA	2289	2.98	1	FALSE	0.0003652	0.002868	0.374
High	Sequest HT	Sequest HT (A5)	A	5	Unambiguous	QFLLAEDTKVR	[Y].qFLLAEDTkVR.[S]	1	O95347	O95347	Structural maintenance of chromosomes protein 2 OS=Homo sapiens OX=9606 GN=SMC2 PE=1 SV=2	O95347	Structural maintenance of chromosomes protein 2 OS=Homo sapiens OX=9606 GN=SMC2 PE=1 SV=2	0	2	2	0.2321	0	1	1	1	783.941	783.941	1566.88	1566.88	-0.35	-0.00028	0/0	0	0	827324	HCD	MS2	9.78796	120	80.0162	30804	30804	30800	220428_iNrich_HELA_MG132_Trypsin_06.raw	F12.6	NA	1712	2.8	1	FALSE	0.001907	0.01695	0.192
High	Sequest HT	Sequest HT (A5)	A	5	Selected	DAPADRQQYLR	[P].dAPADRQQYLR.[Q]	1	O95721	O95721	Synaptosomal-associated protein 29 OS=Homo sapiens OX=9606 GN=SNAP29 PE=1 SV=1	O95721	Synaptosomal-associated protein 29 OS=Homo sapiens OX=9606 GN=SNAP29 PE=1 SV=1	1	3	3	0.2924	0	1	1	1	511.938	511.938	1533.8	1533.8	1.61	0.00082	0/0	0	0	797792	HCD	MS2	20.5332	76.971	53.3418	12353	12353	12342	200821_HELA_MGTG_iNrich_bRP_F02.raw	F1.2	NA	2493	3.01	1	FALSE	7.925e-05	0.000333	0.599
High	Sequest HT	Sequest HT (A5)	A	5	Selected	NLRFHVEEEGKGKDASGNKVKAEPAKIEAFR	[E].nLRFHVEEEGkGkDASGNkVkAEPAkIEAFR.[A]	1	P00558	P00558	Phosphoglycerate kinase 1 OS=Homo sapiens OX=9606 GN=PGK1 PE=1 SV=3	P00558	Phosphoglycerate kinase 1 OS=Homo sapiens OX=9606 GN=PGK1 PE=1 SV=3	1	4	4	0.4159	0	1	1	1	971.274	971.273	3882.07	3882.08	-1.93	-0.00188	0/0	0	0	5.02238e+06	HCD	MS2	54.6142	85.879	93.3253	35606	35606	35594	220621_E_312.raw	F7.12	NA	2616	4.52	1	FALSE	0.001615	0.01431	0.211
High	Sequest HT	Sequest HT (A5)	A	5	Selected	EEGQVEGQDEDIPPITCVQNGLR	[Q].eEGQVEGQDEDIPPITcVQNGLR.[Y]	1	P02452	P02452	Collagen alpha-1(I) chain OS=Homo sapiens OX=9606 GN=COL1A1 PE=1 SV=6	P02452	Collagen alpha-1(I) chain OS=Homo sapiens OX=9606 GN=COL1A1 PE=1 SV=6	0	3	3	0.6283	0	1	1	1	928.783	928.783	2784.33	2784.33	1.3	0.0012	0/0	0	0	1.40313e+06	HCD	MS2	18.6062	120	92.336	29385	29385	29384	200821_HELA_MGTG_iNrich_bRP_F08.raw	F1.8	NA	2655	3.74	1	FALSE	9.269e-06	3.322e-10	2.115
High	Sequest HT	Sequest HT (A5)	A	5	Selected	DTLTDEINFLR	[A].dTLTDEINFLR.[A]	3	P48668	P48668	Keratin, type II cytoskeletal 6C OS=Homo sapiens OX=9606 GN=KRT6C PE=1 SV=3	P04259; P02538; P48668	Keratin, type II cytoskeletal 6B OS=Homo sapiens OX=9606 GN=KRT6B PE=1 SV=5; Keratin, type II cytoskeletal 6A OS=Homo sapiens OX=9606 GN=KRT6A PE=1 SV=3; Keratin, type II cytoskeletal 6C OS=Homo sapiens OX=9606 GN=KRT6C PE=1 SV=3	0	2	0	0.3833	0	1	1	1	769.4	769.4	1537.79	1537.8	-7.27	-0.00559	0/0	0	0	154688	HCD	MS2	68.8578	120	113.482	45115	45115	45113	220428_iNrich_HELA_MG132_Trypsin_09.raw	F12.9	NoneMonoisotopic	2512	2.4	1	FALSE	0.004087	0.03645	0.106
High	Sequest HT	Sequest HT (A5)	A	5	Selected	NGKQREFESR	[D].nGkQREFESR.[L]	1	P02545	P02545	Prelamin-A/C OS=Homo sapiens OX=9606 GN=LMNA PE=1 SV=1	P02545	Prelamin-A/C OS=Homo sapiens OX=9606 GN=LMNA PE=1 SV=1	1	3	3	0.3799	0	1	1	1	499.927	499.927	1497.77	1497.77	-0.03	-2e-05	0/0	0	0	7184869	HCD	MS2	8.04791	14.812	51.1966	11420	11420	11417	200821_HELA_MGTG_iNrich_bRP_F02.raw	F1.2	NA	2341	3.58	1	FALSE	9.666e-05	0.0005826	0.538
High	Sequest HT	Sequest HT (A5)	A	5	Selected	NGKQREFESR	[D].nGkQREFESR.[L]	1	P02545	P02545	Prelamin-A/C OS=Homo sapiens OX=9606 GN=LMNA PE=1 SV=1	P02545	Prelamin-A/C OS=Homo sapiens OX=9606 GN=LMNA PE=1 SV=1	1	3	3	0.3738	0	1	1	1	499.927	499.927	1497.77	1497.77	-1.1	-0.00055	0/0	0	0	14800967	HCD	MS2	15.4009	7.513	56.5579	12248	12248	12244	200925_HELA_iNrich_bRP_F02.raw	F2.2	NA	2355	3.13	1	FALSE	3.982e-05	0.0001911	0.661
High	Sequest HT	Sequest HT (A5)	A	5	Unambiguous	NGKQREFESR	[D].nGkQREFESR.[L]	1	P02545	P02545	Prelamin-A/C OS=Homo sapiens OX=9606 GN=LMNA PE=1 SV=1	P02545	Prelamin-A/C OS=Homo sapiens OX=9606 GN=LMNA PE=1 SV=1	1	3	3	0.1409	0	1	1	1	499.927	499.927	1497.77	1497.77	-0.72	-0.00036	0/0	0	0	807723	HCD	MS2	28.7289	48.378	37.9095	11777	11777	11768	220621_E_112.raw	F5.12	NA	2392	2.2	1	FALSE	0.001109	0.009884	0.25
High	Sequest HT	Sequest HT (A5)	A	5	Unambiguous	NGKQREFESR	[D].nGkQREFESR.[L]	1	P02545	P02545	Prelamin-A/C OS=Homo sapiens OX=9606 GN=LMNA PE=1 SV=1	P02545	Prelamin-A/C OS=Homo sapiens OX=9606 GN=LMNA PE=1 SV=1	1	3	3	0.3025	0	1	1	1	499.927	499.928	1497.77	1497.77	0.03	2e-05	0/0	0	0	4.99403e+06	HCD	MS2	38.9387	13.051	39.1794	12071	12071	12067	220621_E_202.raw	F6.2	NA	2322	2.38	1	FALSE	0.0003767	0.002926	0.372
High	Sequest HT	Sequest HT (A5)	A	5	Selected	NGKQREFESR	[D].nGkQREFESR.[L]	1	P02545	P02545	Prelamin-A/C OS=Homo sapiens OX=9606 GN=LMNA PE=1 SV=1	P02545	Prelamin-A/C OS=Homo sapiens OX=9606 GN=LMNA PE=1 SV=1	1	3	0	0.2802	0	1	1	1	499.927	499.927	1497.77	1497.77	-0.34	-0.00017	0/0	0	0	10658351	HCD	MS2	71.1959	8.565	39.5057	12089	12089	12080	220621_E_203.raw	F6.3	NA	2357	3.64	1	FALSE	3.982e-05	0.0002415	0.635
High	Sequest HT	Sequest HT (A5)	A	5	Selected	NGKQREFESR	[D].nGkQREFESR.[L]	1	P02545	P02545	Prelamin-A/C OS=Homo sapiens OX=9606 GN=LMNA PE=1 SV=1	P02545	Prelamin-A/C OS=Homo sapiens OX=9606 GN=LMNA PE=1 SV=1	1	3	0	0.2926	0	1	1	1	499.927	499.927	1497.77	1497.77	-0.34	-0.00017	0/0	0	0	10658351	HCD	MS2	69.8839	9.386	39.5095	12092	12092	12080	220621_E_203.raw	F6.3	NA	2357	3.52	1	FALSE	0.001281	0.01132	0.236
High	Sequest HT	Sequest HT (A5)	A	5	Unambiguous	NGKQREFESR	[D].nGkQREFESR.[L]	1	P02545	P02545	Prelamin-A/C OS=Homo sapiens OX=9606 GN=LMNA PE=1 SV=1	P02545	Prelamin-A/C OS=Homo sapiens OX=9606 GN=LMNA PE=1 SV=1	1	3	3	0.2555	0	1	1	1	499.928	499.928	1497.77	1497.77	0.89	0.00045	0/0	0	0	1.25601e+06	HCD	MS2	44.8283	35.235	40.4582	12268	12268	12262	220621_E_302.raw	F7.2	NA	2306	2.27	1	FALSE	0.001481	0.01319	0.219
High	Sequest HT	Sequest HT (A5)	A	5	Selected	NGKQREFESR	[D].nGkQREFESR.[L]	1	P02545	P02545	Prelamin-A/C OS=Homo sapiens OX=9606 GN=LMNA PE=1 SV=1	P02545	Prelamin-A/C OS=Homo sapiens OX=9606 GN=LMNA PE=1 SV=1	1	3	3	0.1315	0	1	1	1	499.927	499.927	1497.77	1497.77	-0.31	-0.00016	0/0	0	0	2.66677e+06	HCD	MS2	46.7381	20.649	39.448	11204	11204	11196	220428_iNrich_HELA_MG132_Trypsin_02.raw	F12.2	NA	2357	2.51	1	FALSE	0.002507	0.02221	0.162
High	Sequest HT	Sequest HT (A5)	A	5	Selected	NGKQREFESR	[D].nGkQREFESR.[L]	1	P02545	P02545	Prelamin-A/C OS=Homo sapiens OX=9606 GN=LMNA PE=1 SV=1	P02545	Prelamin-A/C OS=Homo sapiens OX=9606 GN=LMNA PE=1 SV=1	1	3	3	0.221	0	1	1	1	499.927	499.927	1497.77	1497.77	-0.5	-0.00025	0/0	0	0	4.92104e+06	HCD	MS2	21.3257	17.471	39.4876	11223	11223	11222	220428_iNrich_HELA_MG132_Trypsin_02.raw	F12.2	NA	2397	3.53	1	FALSE	0.001849	0.01633	0.196
High	Sequest HT	Sequest HT (A5)	A	5	Selected	NGKQREFESR	[D].nGkQREFESR.[L]	1	P02545	P02545	Prelamin-A/C OS=Homo sapiens OX=9606 GN=LMNA PE=1 SV=1	P02545	Prelamin-A/C OS=Homo sapiens OX=9606 GN=LMNA PE=1 SV=1	1	3	3	0.1625	0	1	1	1	499.927	499.927	1497.77	1497.77	0.03	1e-05	0/0	0	0	3.06231e+06	HCD	MS2	42.2893	20.696	40.5249	11735	11735	11729	220428_iNrich_HELA_MG132_Trypsin_02.raw	F12.2	NA	2322	2.4	1	FALSE	0.001662	0.01474	0.207
High	Sequest HT	Sequest HT (A5)	A	5	Selected	NGKQREFESR	[D].nGkQREFESR.[L]	1	P02545	P02545	Prelamin-A/C OS=Homo sapiens OX=9606 GN=LMNA PE=1 SV=1	P02545	Prelamin-A/C OS=Homo sapiens OX=9606 GN=LMNA PE=1 SV=1	1	3	0	0.3428	0	1	1	1	499.928	499.928	1497.77	1497.77	0.83	0.00042	0/0	0	0	1.99391e+06	HCD	MS2	69.2241	48.068	39.7345	11286	11286	11274	220428_iNrich_HELA_MG132_Trypsin_03.raw	F12.3	NA	2308	3.88	1	FALSE	0.0004267	0.003836	0.345
High	Sequest HT	Sequest HT (A5)	A	5	Unambiguous	EIVHLQAGQCGNQIGAK	[R].eIVHLQAGQcGNQIGAk.[F]	2	P04350; P68371	P04350	Tubulin beta-4A chain OS=Homo sapiens OX=9606 GN=TUBB4A PE=1 SV=2;Tubulin beta-4B chain OS=Homo sapiens OX=9606 GN=TUBB4B PE=1 SV=1	P04350; P68371	Tubulin beta-4A chain OS=Homo sapiens OX=9606 GN=TUBB4A PE=1 SV=2; Tubulin beta-4B chain OS=Homo sapiens OX=9606 GN=TUBB4B PE=1 SV=1	0	2	2	0	0	1	1	1	1035.05	1035.04	2069.08	2069.08	0.13	0.00014	0/0	0	0	1.50299e+06	HCD	MS2	0	97.174	65.9351	27879	27879	27875	220621_E_106.raw	F5.6	NA	2599	5.23	2	FALSE	9.269e-06	8.126e-08	1.516
High	Sequest HT	Sequest HT (A5)	A	5	Unambiguous	EIVHLQAGQCGNQIGAK	[R].eIVHLQAGQcGNQIGAk.[F]	2	P04350; P68371	P04350	Tubulin beta-4A chain OS=Homo sapiens OX=9606 GN=TUBB4A PE=1 SV=2;Tubulin beta-4B chain OS=Homo sapiens OX=9606 GN=TUBB4B PE=1 SV=1	P04350; P68371	Tubulin beta-4A chain OS=Homo sapiens OX=9606 GN=TUBB4A PE=1 SV=2; Tubulin beta-4B chain OS=Homo sapiens OX=9606 GN=TUBB4B PE=1 SV=1	0	3	3	0	0	1	1	1	690.366	690.365	2069.08	2069.08	-0.2	-0.00014	0/0	0	0	5508963	HCD	MS2	3.16073	25.647	65.9428	27884	27884	27875	220621_E_106.raw	F5.6	NA	2596	6.09	2	FALSE	9.269e-06	1.14e-07	1.48
High	Sequest HT	Sequest HT (A5)	A	5	Selected	EIVHLQAGQCGNQIGAK	[R].eIVHLQAGQcGNQIGAk.[F]	2	P04350; P68371	P04350	Tubulin beta-4A chain OS=Homo sapiens OX=9606 GN=TUBB4A PE=1 SV=2;Tubulin beta-4B chain OS=Homo sapiens OX=9606 GN=TUBB4B PE=1 SV=1	P04350; P68371	Tubulin beta-4A chain OS=Homo sapiens OX=9606 GN=TUBB4A PE=1 SV=2; Tubulin beta-4B chain OS=Homo sapiens OX=9606 GN=TUBB4B PE=1 SV=1	0	3	3	0	0	1	1	1	690.366	690.366	2069.08	2069.08	0.38	0.00026	0/0	0	0	2.53924e+06	HCD	MS2	28.8408	74.662	66.7413	28312	28312	28304	220621_E_106.raw	F5.6	NA	2647	5.97	2	FALSE	9.269e-06	1.813e-07	1.429
High	Sequest HT	Sequest HT (A5)	A	5	Selected	EIVHLQAGQCGNQIGAK	[R].eIVHLQAGQcGNQIGAk.[F]	2	P04350; P68371	P04350	Tubulin beta-4A chain OS=Homo sapiens OX=9606 GN=TUBB4A PE=1 SV=2;Tubulin beta-4B chain OS=Homo sapiens OX=9606 GN=TUBB4B PE=1 SV=1	P04350; P68371	Tubulin beta-4A chain OS=Homo sapiens OX=9606 GN=TUBB4A PE=1 SV=2; Tubulin beta-4B chain OS=Homo sapiens OX=9606 GN=TUBB4B PE=1 SV=1	0	3	3	0	0	1	1	1	690.368	690.368	2069.09	2069.08	3.11	0.00214	0/0	0	0	1.17917e+06	HCD	MS2	77.7742	85.274	67.8893	28358	28358	28356	220621_E_107.raw	F5.7	NA	2571	5.34	2	FALSE	9.269e-06	1.995e-06	1.168
High	Sequest HT	Sequest HT (A5)	A	5	Selected	QVSSSLSPEGTLTVEAPMPKLATQSNEITIPVTFESR	[T].qVSSSLSPEGTLTVEAPMPkLATQSNEITIPVTFESR.[A]	1	P04792	P04792	Heat shock protein beta-1 OS=Homo sapiens OX=9606 GN=HSPB1 PE=1 SV=2	P04792	Heat shock protein beta-1 OS=Homo sapiens OX=9606 GN=HSPB1 PE=1 SV=2	0	3	3	0.4297	0	1	1	1	1398.06	1398.06	4192.15	4192.16	-2.12	-0.00297	0/0	0	0	3.02112e+06	HCD	MS2	42.1266	112.105	120.508	40167	40167	40161	200821_HELA_MGTG_iNrich_bRP_F01.raw	F1.1	NA	3781	3.77	1	FALSE	3.982e-05	0.000101	0.734
High	Sequest HT	Sequest HT (A5)	A	5	Unambiguous	ESPAVAAPAYSR	[I].eSPAVAAPAYSR.[A]	1	P04792	P04792	Heat shock protein beta-1 OS=Homo sapiens OX=9606 GN=HSPB1 PE=1 SV=2	P04792	Heat shock protein beta-1 OS=Homo sapiens OX=9606 GN=HSPB1 PE=1 SV=2	0	2	2	0.3061	0	1	1	1	710.375	710.375	1419.74	1419.74	0.12	8e-05	0/0	0	0	787678	HCD	MS2	0	120	63.1109	16044	16044	16040	200821_HELA_MGTG_iNrich_bRP_F06.raw	F1.6	NA	2208	2.45	1	FALSE	0.0009404	0.008565	0.265
High	Sequest HT	Sequest HT (A5)	A	5	Unambiguous	QVSSSLSPEGTLTVEAPMPKLATQSNEITIPVTFESR	[T].qVSSSLSPEGTLTVEAPmPkLATQSNEITIPVTFESR.[A]	1	P04792	P04792	Heat shock protein beta-1 OS=Homo sapiens OX=9606 GN=HSPB1 PE=1 SV=2	P04792	Heat shock protein beta-1 OS=Homo sapiens OX=9606 GN=HSPB1 PE=1 SV=2	0	3	3	0.5383	0	1	1	1	1403.39	1403.39	4208.15	4208.15	-2.26	-0.00316	0/0	0	0	1451586	HCD	MS2	57.6946	120	112.337	38508	38508	38496	200821_HELA_MGTG_iNrich_bRP_F12.raw	F1.12	NA	3869	3.92	1	FALSE	0.0001144	0.0008946	0.493
High	Sequest HT	Sequest HT (A5)	A	5	Unambiguous	ESPAVAAPAYSR	[I].eSPAVAAPAYSR.[A]	1	P04792	P04792	Heat shock protein beta-1 OS=Homo sapiens OX=9606 GN=HSPB1 PE=1 SV=2	P04792	Heat shock protein beta-1 OS=Homo sapiens OX=9606 GN=HSPB1 PE=1 SV=2	0	2	2	0.4327	0	1	1	1	710.375	710.375	1419.74	1419.74	0.72	0.00051	0/0	0	0	1.25396e+06	HCD	MS2	36.2643	120	49.644	15674	15674	15668	220428_iNrich_HELA_MG132_Trypsin_11.raw	F12.11	NA	2248	3.79	1	FALSE	3.982e-05	7.528e-05	0.768
High	Sequest HT	Sequest HT (A5)	A	5	Unambiguous	DLSSHLAKVTAEVVLAHLGGGSTSR	[V].dLSSHLAkVTAEVVLAHLGGGSTSR.[A]	1	P04843	P04843	Dolichyl-diphosphooligosaccharide--protein glycosyltransferase subunit 1 OS=Homo sapiens OX=9606 GN=RPN1 PE=1 SV=1	P04843	Dolichyl-diphosphooligosaccharide--protein glycosyltransferase subunit 1 OS=Homo sapiens OX=9606 GN=RPN1 PE=1 SV=1	0	3	3	0.472	0	1	1	1	917.836	917.836	2751.49	2751.5	-3.3	-0.00303	0/0	0	0	2.15761e+06	HCD	MS2	36.3323	114.572	118.284	39951	39951	39942	200925_HELA_iNrich_bRP_F08.raw	F2.8	NA	2168	4.28	1	FALSE	7.925e-05	0.0003334	0.599
High	Sequest HT	Sequest HT (A5)	A	5	Unambiguous	QSLEIDLDSMR	[V].qSLEIDLDSMR.[N]	1	P05783	P05783	Keratin, type I cytoskeletal 18 OS=Homo sapiens OX=9606 GN=KRT18 PE=1 SV=2	P05783	Keratin, type I cytoskeletal 18 OS=Homo sapiens OX=9606 GN=KRT18 PE=1 SV=2	0	2	2	0.3028	0	1	1	1	754.878	754.878	1508.75	1508.75	1.8	0.00136	0/0	0	0	486263	HCD	MS2	80.4721	120	94.6121	29584	29584	29575	200925_HELA_iNrich_bRP_F02.raw	F2.2	NoneMonoisotopic	2281	2.84	1	FALSE	0.0009109	0.008329	0.268
High	Sequest HT	Sequest HT (A5)	A	5	Selected	QSLEIDLDSMRNLKASLENSLR	[V].qSLEIDLDSMRNLkASLENSLR.[E]	1	P05783	P05783	Keratin, type I cytoskeletal 18 OS=Homo sapiens OX=9606 GN=KRT18 PE=1 SV=2	P05783	Keratin, type I cytoskeletal 18 OS=Homo sapiens OX=9606 GN=KRT18 PE=1 SV=2	1	3	3	0.5	0	1	1	1	927.161	927.161	2779.47	2779.45	6.15	0.0057	0/0	0	0	3204378	HCD	MS2	40.2823	53.023	112.679	37379	37379	37368	200925_HELA_iNrich_bRP_F04.raw	F2.4	NA	2972	3.42	1	FALSE	0.0006468	0.005537	0.309
High	Sequest HT	Sequest HT (A5)	A	5	Unambiguous	NQSLLSPLVLEVDPNIQAVR	[V].nQSLLSPLVLEVDPNIQAVR.[T]	1	P05787	P05787	Keratin, type II cytoskeletal 8 OS=Homo sapiens OX=9606 GN=KRT8 PE=1 SV=7	P05787	Keratin, type II cytoskeletal 8 OS=Homo sapiens OX=9606 GN=KRT8 PE=1 SV=7	0	3	3	0.5665	0	1	1	1	803.116	803.116	2407.33	2407.34	-1.99	-0.00159	0/0	0	0	3.53799e+06	HCD	MS2	8.95474	93.288	118.666	39474	39474	39471	200821_HELA_MGTG_iNrich_bRP_F01.raw	F1.1	NA	1710	6.32	1	FALSE	9.269e-06	2.893e-06	1.127
High	Sequest HT	Sequest HT (A5)	A	5	Selected	QSLLSPLVLEVDPNIQAVR	[N].qSLLSPLVLEVDPNIQAVR.[T]	1	P05787	P05787	Keratin, type II cytoskeletal 8 OS=Homo sapiens OX=9606 GN=KRT8 PE=1 SV=7	P05787	Keratin, type II cytoskeletal 8 OS=Homo sapiens OX=9606 GN=KRT8 PE=1 SV=7	0	3	3	0.5763	0	1	1	1	765.102	765.102	2293.29	2293.3	-2.17	-0.00166	0/0	0	0	1.4278e+06	HCD	MS2	12.5344	120	119.595	40218	40218	40213	200821_HELA_MGTG_iNrich_bRP_F02.raw	F1.2	NA	1274	5.57	1	FALSE	9.269e-06	2.374e-07	1.4
High	Sequest HT	Sequest HT (A5)	A	5	Unambiguous	DANAKLSELEAALQR	[K].dANAkLSELEAALQR.[A]	1	P05787	P05787	Keratin, type II cytoskeletal 8 OS=Homo sapiens OX=9606 GN=KRT8 PE=1 SV=7	P05787	Keratin, type II cytoskeletal 8 OS=Homo sapiens OX=9606 GN=KRT8 PE=1 SV=7	0	3	3	0.5785	0	1	1	1	625.675	625.675	1875.01	1875.02	-5.93	-0.0037	0/0	0	0	628646	HCD	MS2	0	120	127.968	40663	40663	40656	200821_HELA_MGTG_iNrich_bRP_F05.raw	F1.5	NA	2342	3.82	1	FALSE	0.0003767	0.002917	0.372
High	Sequest HT	Sequest HT (A5)	A	5	Selected	DMDSIIAEVKAQYEDIANR	[L].dmDSIIAEVkAQYEDIANR.[S]	1	P05787	P05787	Keratin, type II cytoskeletal 8 OS=Homo sapiens OX=9606 GN=KRT8 PE=1 SV=7	P05787	Keratin, type II cytoskeletal 8 OS=Homo sapiens OX=9606 GN=KRT8 PE=1 SV=7	0	3	3	0.5914	0	1	1	1	815.068	815.068	2443.19	2443.2	-5.66	-0.00461	0/0	0	0	1.03037e+06	HCD	MS2	51.7762	120	125.881	43807	43807	43797	200821_HELA_MGTG_iNrich_bRP_F12.raw	F1.12	NoneMonoisotopic	2693	4.87	1	FALSE	0.001263	0.01115	0.237
High	Sequest HT	Sequest HT (A5)	A	5	Unambiguous	NQSLLSPLVLEVDPNIQAVR	[V].nQSLLSPLVLEVDPNIQAVR.[T]	1	P05787	P05787	Keratin, type II cytoskeletal 8 OS=Homo sapiens OX=9606 GN=KRT8 PE=1 SV=7	P05787	Keratin, type II cytoskeletal 8 OS=Homo sapiens OX=9606 GN=KRT8 PE=1 SV=7	0	3	3	0.6066	0	1	1	1	803.118	803.118	2407.34	2407.34	0.84	0.00068	0/0	0	0	3640521	HCD	MS2	38.2997	85.461	106.19	51130	51130	51119	220621_E_204.raw	F6.4	NA	1552	7.22	1	FALSE	9.269e-06	5.408e-08	1.561
High	Sequest HT	Sequest HT (A5)	A	5	Unambiguous	EQQQLIDDHFLFDKPVSPLLLASGMAR	[KA].eQQQLIDDHFLFDkPVSPLLLASGMAR.[D]	2	P12277	P12277	Creatine kinase B-type OS=Homo sapiens OX=9606 GN=CKB PE=1 SV=1	P06732; P12277	Creatine kinase M-type OS=Homo sapiens OX=9606 GN=CKM PE=1 SV=2; Creatine kinase B-type OS=Homo sapiens OX=9606 GN=CKB PE=1 SV=1	0	3	3	0.312	0	1	1	1	1105.58	1105.58	3314.73	3314.75	-6.52	-0.0072	0/0	0	0	1.58048e+06	HCD	MS2	60.3526	120	125.96	55941	55941	55929	220621_E_108.raw	F5.8	NA	3212	3.59	1	FALSE	0.0007447	0.00649	0.293
High	Sequest HT	Sequest HT (A5)	A	5	Unambiguous	EEELGSKAKFAGR	[I].eEELGSkAkFAGR.[N]	1	P06733	P06733	Alpha-enolase OS=Homo sapiens OX=9606 GN=ENO1 PE=1 SV=2	P06733	Alpha-enolase OS=Homo sapiens OX=9606 GN=ENO1 PE=1 SV=2	0	2	2	0.3831	0	1	1	1	856.972	856.972	1712.94	1712.93	4.8	0.00411	0/0	0	0	0	HCD	MS2	NA	86.378	91.7447	29700	29700	29692	200925_HELA_iNrich_bRP_F12.raw	F2.12	NA	2021	2.61	1	FALSE	0.0005079	0.004454	0.33
High	Sequest HT	Sequest HT (A5)	A	5	Selected	EEELGSKAKFAGR	[I].eEELGSkAkFAGR.[N]	1	P06733	P06733	Alpha-enolase OS=Homo sapiens OX=9606 GN=ENO1 PE=1 SV=2	P06733	Alpha-enolase OS=Homo sapiens OX=9606 GN=ENO1 PE=1 SV=2	0	2	2	0.3906	0	1	1	1	856.967	856.965	1712.93	1712.93	-0.33	-0.00028	0/0	0	0	4876327	HCD	MS2	9.37253	56.016	106.15	49276	49276	49273	220621_E_105.raw	F5.5	NA	2052	2.97	1	FALSE	0.0001491	0.001089	0.473
High	Sequest HT	Sequest HT (A5)	A	5	Unambiguous	ELQAAGKSPEDLER	[K].eLQAAGkSPEDLER.[L]	1	P06744	P06744	Glucose-6-phosphate isomerase OS=Homo sapiens OX=9606 GN=GPI PE=1 SV=4	P06744	Glucose-6-phosphate isomerase OS=Homo sapiens OX=9606 GN=GPI PE=1 SV=4	0	2	2	0.5608	0	1	1	1	894.965	894.965	1788.92	1788.94	-7.42	-0.00664	0/0	0	0	1.11367e+06	HCD	MS2	14.3401	120	88.4765	28089	28089	28084	200821_HELA_MGTG_iNrich_bRP_F03.raw	F1.3	NA	2806	3.78	1	FALSE	3.982e-05	7.871e-05	0.763
High	Sequest HT	Sequest HT (A5)	A	5	Unambiguous	ELQAAGKSPEDLER	[K].eLQAAGkSPEDLER.[L]	1	P06744	P06744	Glucose-6-phosphate isomerase OS=Homo sapiens OX=9606 GN=GPI PE=1 SV=4	P06744	Glucose-6-phosphate isomerase OS=Homo sapiens OX=9606 GN=GPI PE=1 SV=4	0	3	3	0.58	0	1	1	1	596.98	596.98	1788.92	1788.94	-6.1	-0.00364	0/0	0	0	3.58472e+06	HCD	MS2	37.5904	33.966	88.6533	28166	28166	28162	200821_HELA_MGTG_iNrich_bRP_F03.raw	F1.3	NA	2746	4.31	1	FALSE	0.0003882	0.003125	0.365
High	Sequest HT	Sequest HT (A5)	A	5	Selected	ELQAAGKSPEDLER	[K].eLQAAGkSPEDLER.[L]	1	P06744	P06744	Glucose-6-phosphate isomerase OS=Homo sapiens OX=9606 GN=GPI PE=1 SV=4	P06744	Glucose-6-phosphate isomerase OS=Homo sapiens OX=9606 GN=GPI PE=1 SV=4	0	2	2	0.4696	0	1	1	1	894.965	894.965	1788.92	1788.94	-7.48	-0.00669	0/0	0	0	1.7588e+06	HCD	MS2	0	68.991	77.3554	33981	33981	33972	220621_E_105.raw	F5.5	NA	2796	3.62	1	FALSE	0.001048	0.009346	0.256
High	Sequest HT	Sequest HT (A5)	A	5	Unambiguous	QNGKDSKPSSTPR	[N].qNGkDSkPSSTPR.[S]	1	P06748	P06748	Nucleophosmin OS=Homo sapiens OX=9606 GN=NPM1 PE=1 SV=2	P06748	Nucleophosmin OS=Homo sapiens OX=9606 GN=NPM1 PE=1 SV=2	0	2	2	0.3957	0	1	1	1	847.443	847.443	1693.88	1693.88	-1.68	-0.00142	0/0	0	0	584846	HCD	MS2	0	120	52.3199	11910	11910	11898	200821_HELA_MGTG_iNrich_bRP_F02.raw	F1.2	NA	2545	1.87	1	FALSE	0.005887	0.05587	0.06
High	Sequest HT	Sequest HT (A5)	A	5	Selected	QNGKDSKPSSTPR	[N].qNGkDSkPSSTPR.[S]	1	P06748	P06748	Nucleophosmin OS=Homo sapiens OX=9606 GN=NPM1 PE=1 SV=2	P06748	Nucleophosmin OS=Homo sapiens OX=9606 GN=NPM1 PE=1 SV=2	0	2	2	0.5099	0	1	1	1	847.445	847.445	1693.88	1693.88	1	0.00085	0/0	0	0	2163137	HCD	MS2	12.1571	81.111	40.7107	12711	12711	12704	220621_E_203.raw	F6.3	NA	2477	3.04	1	FALSE	7.925e-05	0.000377	0.585
High	Sequest HT	Sequest HT (A5)	A	5	Selected	EKACANPAPGSVILLENLR	[V].ekAcANPAPGSVILLENLR.[F]	1	P07205	P07205	Phosphoglycerate kinase 2 OS=Homo sapiens OX=9606 GN=PGK2 PE=1 SV=3	P07205	Phosphoglycerate kinase 2 OS=Homo sapiens OX=9606 GN=PGK2 PE=1 SV=3	0	2	2	0.4046	0	1	1	1	1149.62	1149.62	2298.23	2298.25	-8.58	-0.00986	0/0	0	0	4.56535e+06	HCD	MS2	0	75.188	112.72	52402	52402	52393	220621_E_102.raw	F5.2	NA	2478	2.62	1	FALSE	0.006058	0.0578	0.057
High	Sequest HT	Sequest HT (A5)	A	5	Selected	EKACANPAPGSVILLENLR	[V].ekAcANPAPGSVILLENLR.[F]	1	P07205	P07205	Phosphoglycerate kinase 2 OS=Homo sapiens OX=9606 GN=PGK2 PE=1 SV=3	P07205	Phosphoglycerate kinase 2 OS=Homo sapiens OX=9606 GN=PGK2 PE=1 SV=3	0	2	2	0.4094	0	1	1	1	1149.62	1149.62	2298.23	2298.25	-7.03	-0.00808	0/0	0	0	707843	HCD	MS2	0	120	106.315	42947	42947	42942	220428_iNrich_HELA_MG132_Trypsin_04.raw	F12.4	NA	2408	2.54	1	FALSE	0.003718	0.03303	0.117
High	Sequest HT	Sequest HT (A5)	A	5	Selected	DAPEEEDHVLVLR	[A].dAPEEEDHVLVLR.[K]	1	P07237	P07237	Protein disulfide-isomerase OS=Homo sapiens OX=9606 GN=P4HB PE=1 SV=3	P07237	Protein disulfide-isomerase OS=Homo sapiens OX=9606 GN=P4HB PE=1 SV=3	0	3	3	0.6733	0	1	1	1	574.966	574.966	1722.88	1722.88	-0.01	0	0/0	0	0	12229379	HCD	MS2	4.09153	9.025	70.5604	19779	19779	19776	200821_HELA_MGTG_iNrich_bRP_F04.raw	F1.4	NA	2484	5.05	1	FALSE	9.269e-06	8.976e-08	1.506
High	Sequest HT	Sequest HT (A5)	A	5	Selected	DAPEEEDHVLVLR	[A].dAPEEEDHVLVLR.[K]	1	P07237	P07237	Protein disulfide-isomerase OS=Homo sapiens OX=9606 GN=P4HB PE=1 SV=3	P07237	Protein disulfide-isomerase OS=Homo sapiens OX=9606 GN=P4HB PE=1 SV=3	0	2	2	0.5682	0	1	1	1	861.946	861.946	1722.89	1722.88	0.22	0.00019	0/0	0	0	1.8705e+06	HCD	MS2	26.3328	96.198	70.6785	19837	19837	19828	200821_HELA_MGTG_iNrich_bRP_F04.raw	F1.4	NA	2541	3.59	1	FALSE	9.269e-06	1.062e-07	1.487
High	Sequest HT	Sequest HT (A5)	A	5	Selected	DAPEEEDHVLVLR	[A].dAPEEEDHVLVLR.[K]	1	P07237	P07237	Protein disulfide-isomerase OS=Homo sapiens OX=9606 GN=P4HB PE=1 SV=3	P07237	Protein disulfide-isomerase OS=Homo sapiens OX=9606 GN=P4HB PE=1 SV=3	0	3	3	0.5338	0	1	1	1	574.967	574.967	1722.89	1722.88	0.74	0.00043	0/0	0	0	2.14939e+06	HCD	MS2	17.4838	27.78	71.0775	20011	20011	20010	200821_HELA_MGTG_iNrich_bRP_F04.raw	F1.4	NA	2552	4.44	1	FALSE	3.982e-05	8.492e-05	0.754
High	Sequest HT	Sequest HT (A5)	A	5	Selected	DAPEEEDHVLVLR	[A].dAPEEEDHVLVLR.[K]	1	P07237	P07237	Protein disulfide-isomerase OS=Homo sapiens OX=9606 GN=P4HB PE=1 SV=3	P07237	Protein disulfide-isomerase OS=Homo sapiens OX=9606 GN=P4HB PE=1 SV=3	0	3	3	0.5894	0	1	1	1	574.967	574.967	1722.89	1722.88	0.44	0.00025	0/0	0	0	3.80321e+06	HCD	MS2	30.1731	13.582	72.4578	20650	20650	20647	200821_HELA_MGTG_iNrich_bRP_F04.raw	F1.4	NA	2553	5.26	1	FALSE	9.269e-06	2.353e-06	1.15
High	Sequest HT	Sequest HT (A5)	A	5	Selected	DAPEEEDHVLVLR	[A].dAPEEEDHVLVLR.[K]	1	P07237	P07237	Protein disulfide-isomerase OS=Homo sapiens OX=9606 GN=P4HB PE=1 SV=3	P07237	Protein disulfide-isomerase OS=Homo sapiens OX=9606 GN=P4HB PE=1 SV=3	0	2	2	0.4334	0	1	1	1	861.946	861.946	1722.88	1722.88	-0.33	-0.00028	0/0	0	0	12662238	HCD	MS2	7.68721	10.227	72.6372	20731	20731	20725	200821_HELA_MGTG_iNrich_bRP_F04.raw	F1.4	NA	2518	2.93	1	FALSE	9.269e-06	1.311e-05	0.962
High	Sequest HT	Sequest HT (A5)	A	5	Unambiguous	DAPEEEDHVLVLR	[A].dAPEEEDHVLVLR.[K]	1	P07237	P07237	Protein disulfide-isomerase OS=Homo sapiens OX=9606 GN=P4HB PE=1 SV=3	P07237	Protein disulfide-isomerase OS=Homo sapiens OX=9606 GN=P4HB PE=1 SV=3	0	3	3	0.6381	0	1	1	1	574.966	574.966	1722.88	1722.88	-0.3	-0.00017	0/0	0	0	48318868	HCD	MS2	2.98939	2.034	72.9834	20882	20882	20881	200821_HELA_MGTG_iNrich_bRP_F04.raw	F1.4	NA	2494	5.25	1	FALSE	9.269e-06	3.618e-08	1.605
High	Sequest HT	Sequest HT (A5)	A	5	Selected	DAPEEEDHVLVLR	[A].dAPEEEDHVLVLR.[K]	1	P07237	P07237	Protein disulfide-isomerase OS=Homo sapiens OX=9606 GN=P4HB PE=1 SV=3	P07237	Protein disulfide-isomerase OS=Homo sapiens OX=9606 GN=P4HB PE=1 SV=3	0	3	3	0.5204	0	1	1	1	574.967	574.967	1722.89	1722.88	0.13	7e-05	0/0	0	0	3.14806e+06	HCD	MS2	48.3684	23.631	73.5097	21116	21116	21115	200821_HELA_MGTG_iNrich_bRP_F04.raw	F1.4	NA	2543	4.42	1	FALSE	9.269e-06	3.332e-06	1.112
High	Sequest HT	Sequest HT (A5)	A	5	Unambiguous	DAPEEEDHVLVLR	[A].dAPEEEDHVLVLR.[K]	1	P07237	P07237	Protein disulfide-isomerase OS=Homo sapiens OX=9606 GN=P4HB PE=1 SV=3	P07237	Protein disulfide-isomerase OS=Homo sapiens OX=9606 GN=P4HB PE=1 SV=3	0	3	3	0.6021	0	1	1	1	574.966	574.966	1722.88	1722.88	-0.14	-8e-05	0/0	0	0	1.26535e+06	HCD	MS2	27.7382	90.736	72.9256	19632	19632	19628	200821_HELA_MGTG_iNrich_bRP_F05.raw	F1.5	NA	2481	5.63	1	FALSE	9.269e-06	5.136e-09	1.817
High	Sequest HT	Sequest HT (A5)	A	5	Selected	DAPEEEDHVLVLR	[A].dAPEEEDHVLVLR.[K]	1	P07237	P07237	Protein disulfide-isomerase OS=Homo sapiens OX=9606 GN=P4HB PE=1 SV=3	P07237	Protein disulfide-isomerase OS=Homo sapiens OX=9606 GN=P4HB PE=1 SV=3	0	3	3	0.5341	0	1	1	1	574.967	574.967	1722.89	1722.88	0.2	0.00011	0/0	0	0	3.19025e+06	HCD	MS2	41.0438	30.795	74.2196	20891	20891	20887	200821_HELA_MGTG_iNrich_bRP_F06.raw	F1.6	NA	2541	4.4	1	FALSE	9.269e-06	1.509e-06	1.198
High	Sequest HT	Sequest HT (A5)	A	5	Selected	DAPEEEDHVLVLR	[A].dAPEEEDHVLVLR.[K]	1	P07237	P07237	Protein disulfide-isomerase OS=Homo sapiens OX=9606 GN=P4HB PE=1 SV=3	P07237	Protein disulfide-isomerase OS=Homo sapiens OX=9606 GN=P4HB PE=1 SV=3	0	3	3	0.5637	0	1	1	1	574.966	574.966	1722.88	1722.88	-1.67	-0.00096	0/0	0	0	2.76037e+06	HCD	MS2	32.2307	36.162	73.4351	21056	21056	21048	200821_HELA_MGTG_iNrich_bRP_F07.raw	F1.7	NA	2547	5.18	1	FALSE	9.269e-06	2.979e-06	1.124
High	Sequest HT	Sequest HT (A5)	A	5	Unambiguous	DAPEEEDHVLVLR	[A].dAPEEEDHVLVLR.[K]	1	P07237	P07237	Protein disulfide-isomerase OS=Homo sapiens OX=9606 GN=P4HB PE=1 SV=3	P07237	Protein disulfide-isomerase OS=Homo sapiens OX=9606 GN=P4HB PE=1 SV=3	0	3	3	0.6052	0	1	1	1	574.967	574.967	1722.89	1722.88	0.22	0.00013	0/0	0	0	1.48118e+06	HCD	MS2	0	94.388	74.9529	21722	21722	21721	200821_HELA_MGTG_iNrich_bRP_F07.raw	F1.7	NA	2541	5.42	1	FALSE	9.269e-06	2.561e-07	1.391
High	Sequest HT	Sequest HT (A5)	A	5	Selected	DAPEEEDHVLVLR	[A].dAPEEEDHVLVLR.[K]	1	P07237	P07237	Protein disulfide-isomerase OS=Homo sapiens OX=9606 GN=P4HB PE=1 SV=3	P07237	Protein disulfide-isomerase OS=Homo sapiens OX=9606 GN=P4HB PE=1 SV=3	0	3	3	0.5607	0	1	1	1	574.966	574.966	1722.88	1722.88	-1.57	-0.0009	0/0	0	0	2.03912e+06	HCD	MS2	27.7835	45.321	72.9039	20291	20291	20286	200821_HELA_MGTG_iNrich_bRP_F10.raw	F1.10	NA	2552	4.94	1	FALSE	9.269e-06	4.381e-06	1.082
High	Sequest HT	Sequest HT (A5)	A	5	Selected	DAPEEEDHVLVLR	[A].dAPEEEDHVLVLR.[K]	1	P07237	P07237	Protein disulfide-isomerase OS=Homo sapiens OX=9606 GN=P4HB PE=1 SV=3	P07237	Protein disulfide-isomerase OS=Homo sapiens OX=9606 GN=P4HB PE=1 SV=3	0	3	3	0.5164	0	1	1	1	574.968	574.968	1722.89	1722.88	2.44	0.0014	0/0	0	0	1.55569e+06	HCD	MS2	25.1375	24.837	75.0015	21086	21086	21080	200925_HELA_iNrich_bRP_F04.raw	F2.4	NA	2516	4.28	1	FALSE	9.269e-06	4.553e-06	1.078
High	Sequest HT	Sequest HT (A5)	A	5	Selected	NGDTASPKEYTAGR	[R].nGDTASPkEYTAGR.[E]	1	P07237	P07237	Protein disulfide-isomerase OS=Homo sapiens OX=9606 GN=P4HB PE=1 SV=3	P07237	Protein disulfide-isomerase OS=Homo sapiens OX=9606 GN=P4HB PE=1 SV=3	0	2	2	0.4776	0	1	1	1	857.42	857.42	1713.83	1713.83	1.4	0.0012	0/0	0	0	2.21147e+06	HCD	MS2	13.7292	74.795	49.9753	18948	18948	18944	220621_E_104.raw	F5.4	NA	2147	2.01	1	FALSE	7.925e-05	0.0003471	0.595
High	Sequest HT	Sequest HT (A5)	A	5	Selected	NGDTASPKEYTAGR	[R].nGDTASPkEYTAGR.[E]	1	P07237	P07237	Protein disulfide-isomerase OS=Homo sapiens OX=9606 GN=P4HB PE=1 SV=3	P07237	Protein disulfide-isomerase OS=Homo sapiens OX=9606 GN=P4HB PE=1 SV=3	0	2	2	0.3613	0	1	1	1	857.42	857.42	1713.83	1713.83	0.92	0.00079	0/0	0	0	1.34239e+06	HCD	MS2	22.845	81.75	49.9155	19136	19136	19126	220621_E_205.raw	F6.5	NA	2171	1.91	1	FALSE	0.00502	0.04651	0.079
High	Sequest HT	Sequest HT (A5)	A	5	Unambiguous	DAPEEEDHVLVLR	[A].dAPEEEDHVLVLR.[K]	1	P07237	P07237	Protein disulfide-isomerase OS=Homo sapiens OX=9606 GN=P4HB PE=1 SV=3	P07237	Protein disulfide-isomerase OS=Homo sapiens OX=9606 GN=P4HB PE=1 SV=3	0	3	0	0.5282	0	1	1	1	574.966	574.966	1722.88	1722.88	-0.4	-0.00023	0/0	0	0	8677057	HCD	MS2	74.3063	7.041	58.7528	22403	22403	22402	220621_E_210.raw	F6.10	NA	2568	3.54	1	FALSE	7.925e-05	0.0003387	0.597
High	Sequest HT	Sequest HT (A5)	A	5	Unambiguous	DAPEEEDHVLVLR	[A].dAPEEEDHVLVLR.[K]	1	P07237	P07237	Protein disulfide-isomerase OS=Homo sapiens OX=9606 GN=P4HB PE=1 SV=3	P07237	Protein disulfide-isomerase OS=Homo sapiens OX=9606 GN=P4HB PE=1 SV=3	0	3	3	0.6438	0	1	1	1	574.966	574.966	1722.88	1722.88	-1.07	-0.00062	0/0	0	0	11514642	HCD	MS2	12.4394	9.602	61.0299	23680	23680	23676	220621_E_210.raw	F6.10	NA	2589	4.8	1	FALSE	9.269e-06	1.902e-07	1.424
High	Sequest HT	Sequest HT (A5)	A	5	Selected	DAPEEEDHVLVLR	[A].dAPEEEDHVLVLR.[K]	1	P07237	P07237	Protein disulfide-isomerase OS=Homo sapiens OX=9606 GN=P4HB PE=1 SV=3	P07237	Protein disulfide-isomerase OS=Homo sapiens OX=9606 GN=P4HB PE=1 SV=3	0	2	2	0.4091	0	1	1	1	861.944	861.944	1722.88	1722.88	-2.09	-0.0018	0/0	0	0	4.1325e+06	HCD	MS2	0	46.244	61.1373	23746	23746	23741	220621_E_210.raw	F6.10	NA	2520	2.86	1	FALSE	9.269e-06	4.656e-05	0.822
High	Sequest HT	Sequest HT (A5)	A	5	Unambiguous	DAPEEEDHVLVLR	[A].dAPEEEDHVLVLR.[K]	1	P07237	P07237	Protein disulfide-isomerase OS=Homo sapiens OX=9606 GN=P4HB PE=1 SV=3	P07237	Protein disulfide-isomerase OS=Homo sapiens OX=9606 GN=P4HB PE=1 SV=3	0	3	3	0.5267	0	1	1	1	574.966	574.966	1722.88	1722.88	-0.93	-0.00053	0/0	0	0	4.98511e+06	HCD	MS2	62.0529	13.989	61.1397	24004	24004	24001	220621_E_301.raw	F7.1	NA	2598	3.93	1	FALSE	9.269e-06	1.283e-05	0.965
High	Sequest HT	Sequest HT (A5)	A	5	Unambiguous	DAPEEEDHVLVLR	[A].dAPEEEDHVLVLR.[K]	1	P07237	P07237	Protein disulfide-isomerase OS=Homo sapiens OX=9606 GN=P4HB PE=1 SV=3	P07237	Protein disulfide-isomerase OS=Homo sapiens OX=9606 GN=P4HB PE=1 SV=3	0	3	0	0.5481	0	1	1	1	574.966	574.966	1722.88	1722.88	-0.53	-0.00031	0/0	0	0	4689728	HCD	MS2	49.7645	49.255	62.3607	24701	24701	24690	220621_E_301.raw	F7.1	NA	2570	4.05	1	FALSE	9.269e-06	4.61e-08	1.578
High	Sequest HT	Sequest HT (A5)	A	5	Selected	DAPEEEDHVLVLR	[A].dAPEEEDHVLVLR.[K]	1	P07237	P07237	Protein disulfide-isomerase OS=Homo sapiens OX=9606 GN=P4HB PE=1 SV=3	P07237	Protein disulfide-isomerase OS=Homo sapiens OX=9606 GN=P4HB PE=1 SV=3	0	3	3	0.6098	0	1	1	1	574.966	574.966	1722.88	1722.88	-0.65	-0.00037	0/0	0	0	2.12939e+06	HCD	MS2	17.462	44.583	58.1617	19695	19695	19690	220621_E_310.raw	F7.10	NA	2588	5.28	1	FALSE	9.269e-06	2.742e-07	1.384
High	Sequest HT	Sequest HT (A5)	A	5	Unambiguous	DAPEEEDHVLVLR	[A].dAPEEEDHVLVLR.[K]	1	P07237	P07237	Protein disulfide-isomerase OS=Homo sapiens OX=9606 GN=P4HB PE=1 SV=3	P07237	Protein disulfide-isomerase OS=Homo sapiens OX=9606 GN=P4HB PE=1 SV=3	0	3	0	0.5873	0	1	1	1	574.966	574.966	1722.88	1722.88	-0.24	-0.00013	0/0	0	0	670378	HCD	MS2	78.2594	67.047	58.7698	19952	19952	19950	220621_E_310.raw	F7.10	NA	2478	4.24	1	FALSE	9.269e-06	5.119e-06	1.065
High	Sequest HT	Sequest HT (A5)	A	5	Unambiguous	DAPEEEDHVLVLR	[A].dAPEEEDHVLVLR.[K]	1	P07237	P07237	Protein disulfide-isomerase OS=Homo sapiens OX=9606 GN=P4HB PE=1 SV=3	P07237	Protein disulfide-isomerase OS=Homo sapiens OX=9606 GN=P4HB PE=1 SV=3	0	3	3	0.5877	0	1	1	1	574.966	574.966	1722.88	1722.88	-0.9	-0.00052	0/0	0	0	1.15438e+06	HCD	MS2	21.9484	83.356	60.3048	20590	20590	20587	220621_E_310.raw	F7.10	NA	2598	4.56	1	FALSE	9.269e-06	8.766e-08	1.508
High	Sequest HT	Sequest HT (A5)	A	5	Selected	DAPEEEDHVLVLR	[A].dAPEEEDHVLVLR.[K]	1	P07237	P07237	Protein disulfide-isomerase OS=Homo sapiens OX=9606 GN=P4HB PE=1 SV=3	P07237	Protein disulfide-isomerase OS=Homo sapiens OX=9606 GN=P4HB PE=1 SV=3	0	2	2	0.4583	0	1	1	1	861.948	861.947	1722.89	1722.88	1.86	0.00161	0/0	0	0	330938	HCD	MS2	0	120	60.4162	20636	20636	20626	220621_E_310.raw	F7.10	NA	2513	2.4	1	FALSE	0.000111	0.0007663	0.509
High	Sequest HT	Sequest HT (A5)	A	5	Selected	DAPEEEDHVLVLR	[A].dAPEEEDHVLVLR.[K]	1	P07237	P07237	Protein disulfide-isomerase OS=Homo sapiens OX=9606 GN=P4HB PE=1 SV=3	P07237	Protein disulfide-isomerase OS=Homo sapiens OX=9606 GN=P4HB PE=1 SV=3	0	3	3	0.6169	0	1	1	1	574.967	574.967	1722.89	1722.88	0.57	0.00033	0/0	0	0	11154978	HCD	MS2	6.68264	9.127	60.815	20796	20796	20795	220621_E_310.raw	F7.10	NA	2545	5.69	1	FALSE	9.269e-06	1.905e-09	1.925
High	Sequest HT	Sequest HT (A5)	A	5	Selected	DAPEEEDHVLVLR	[A].dAPEEEDHVLVLR.[K]	1	P07237	P07237	Protein disulfide-isomerase OS=Homo sapiens OX=9606 GN=P4HB PE=1 SV=3	P07237	Protein disulfide-isomerase OS=Homo sapiens OX=9606 GN=P4HB PE=1 SV=3	0	3	3	0.5842	0	1	1	1	574.967	574.967	1722.89	1722.88	0.77	0.00044	0/0	0	0	1.46273e+06	HCD	MS2	17.1817	79.977	61.3518	21017	21017	21016	220621_E_310.raw	F7.10	NA	2531	5.46	1	FALSE	9.269e-06	2.471e-08	1.646
High	Sequest HT	Sequest HT (A5)	A	5	Selected	DAPEEEDHVLVLR	[A].dAPEEEDHVLVLR.[K]	1	P07237	P07237	Protein disulfide-isomerase OS=Homo sapiens OX=9606 GN=P4HB PE=1 SV=3	P07237	Protein disulfide-isomerase OS=Homo sapiens OX=9606 GN=P4HB PE=1 SV=3	0	3	3	0.5561	0	1	1	1	574.967	574.967	1722.89	1722.88	1.67	0.00096	0/0	0	0	214191	HCD	MS2	42.6169	120	63.1755	21740	21740	21731	220621_E_310.raw	F7.10	NA	2514	4.28	1	FALSE	9.269e-06	1.686e-05	0.935
High	Sequest HT	Sequest HT (A5)	A	5	Unambiguous	DAPEEEDHVLVLR	[A].dAPEEEDHVLVLR.[K]	1	P07237	P07237	Protein disulfide-isomerase OS=Homo sapiens OX=9606 GN=P4HB PE=1 SV=3	P07237	Protein disulfide-isomerase OS=Homo sapiens OX=9606 GN=P4HB PE=1 SV=3	0	3	3	0.5468	0	1	1	1	574.966	574.966	1722.88	1722.88	-1.06	-0.00061	0/0	0	0	284714	HCD	MS2	39.5613	120	58.1986	19115	19115	19109	220621_E_311.raw	F7.11	NA	2591	3.95	1	FALSE	9.269e-06	5.359e-06	1.06
High	Sequest HT	Sequest HT (A5)	A	5	Unambiguous	DAPEEEDHVLVLR	[A].dAPEEEDHVLVLR.[K]	1	P07237	P07237	Protein disulfide-isomerase OS=Homo sapiens OX=9606 GN=P4HB PE=1 SV=3	P07237	Protein disulfide-isomerase OS=Homo sapiens OX=9606 GN=P4HB PE=1 SV=3	0	3	3	0.5405	0	1	1	1	574.966	574.966	1722.88	1722.88	-0.86	-0.0005	0/0	0	0	1.07546e+06	HCD	MS2	45.6823	56.873	59.2353	19566	19566	19564	220621_E_311.raw	F7.11	NA	2601	3.46	1	FALSE	9.269e-06	2.391e-05	0.896
High	Sequest HT	Sequest HT (A5)	A	5	Unambiguous	DAPEEEDHVLVLR	[A].dAPEEEDHVLVLR.[K]	1	P07237	P07237	Protein disulfide-isomerase OS=Homo sapiens OX=9606 GN=P4HB PE=1 SV=3	P07237	Protein disulfide-isomerase OS=Homo sapiens OX=9606 GN=P4HB PE=1 SV=3	0	3	0	0.476	0	1	1	1	574.966	574.966	1722.88	1722.88	-1.08	-0.00062	0/0	0	0	2930328	HCD	MS2	69.2268	23.755	60.4834	20120	20120	20110	220621_E_311.raw	F7.11	NA	2588	3.13	1	FALSE	9.269e-06	2.36e-05	0.898
High	Sequest HT	Sequest HT (A5)	A	5	Unambiguous	DAPEEEDHVLVLR	[A].dAPEEEDHVLVLR.[K]	1	P07237	P07237	Protein disulfide-isomerase OS=Homo sapiens OX=9606 GN=P4HB PE=1 SV=3	P07237	Protein disulfide-isomerase OS=Homo sapiens OX=9606 GN=P4HB PE=1 SV=3	0	3	3	0.4728	0	1	1	1	574.966	574.966	1722.88	1722.88	-0.84	-0.00048	0/0	0	0	1.24617e+06	HCD	MS2	37.4244	53.661	61.4863	21077	21077	21073	220621_E_312.raw	F7.12	NA	2601	3.68	1	FALSE	9.269e-06	4.13e-07	1.339
High	Sequest HT	Sequest HT (A5)	A	5	Unambiguous	DAPEEEDHVLVLR	[A].dAPEEEDHVLVLR.[K]	1	P07237	P07237	Protein disulfide-isomerase OS=Homo sapiens OX=9606 GN=P4HB PE=1 SV=3	P07237	Protein disulfide-isomerase OS=Homo sapiens OX=9606 GN=P4HB PE=1 SV=3	0	3	0	0.456	0	1	1	1	574.966	574.966	1722.88	1722.88	-0.05	-3e-05	0/0	0	0	3598397	HCD	MS2	93.5232	3.846	58.316	20623	20623	20621	220428_iNrich_HELA_MG132_Trypsin_08.raw	F12.8	NA	2477	2.5	1	FALSE	0.0002542	0.001781	0.422
High	Sequest HT	Sequest HT (A5)	A	5	Selected	DAPEEEDHVLVLR	[A].dAPEEEDHVLVLR.[K]	1	P07237	P07237	Protein disulfide-isomerase OS=Homo sapiens OX=9606 GN=P4HB PE=1 SV=3	P07237	Protein disulfide-isomerase OS=Homo sapiens OX=9606 GN=P4HB PE=1 SV=3	0	3	3	0.6341	0	1	1	1	574.966	574.966	1722.88	1722.88	-0.68	-0.00039	0/0	0	0	1.9979e+06	HCD	MS2	37.0425	24.587	60.4559	21600	21600	21596	220428_iNrich_HELA_MG132_Trypsin_08.raw	F12.8	NA	2588	4.51	1	FALSE	9.269e-06	1.726e-06	1.184
High	Sequest HT	Sequest HT (A5)	A	5	Selected	DAPEEEDHVLVLR	[A].dAPEEEDHVLVLR.[K]	1	P07237	P07237	Protein disulfide-isomerase OS=Homo sapiens OX=9606 GN=P4HB PE=1 SV=3	P07237	Protein disulfide-isomerase OS=Homo sapiens OX=9606 GN=P4HB PE=1 SV=3	0	2	2	0.5669	0	1	1	1	861.947	861.947	1722.89	1722.88	0.49	0.00043	0/0	0	0	1.84682e+06	HCD	MS2	7.40293	120	60.5947	21664	21664	21661	220428_iNrich_HELA_MG132_Trypsin_08.raw	F12.8	NA	2539	4.11	1	FALSE	9.269e-06	1.435e-08	1.705
High	Sequest HT	Sequest HT (A5)	A	5	Unambiguous	DAPEEEDHVLVLR	[A].dAPEEEDHVLVLR.[K]	1	P07237	P07237	Protein disulfide-isomerase OS=Homo sapiens OX=9606 GN=P4HB PE=1 SV=3	P07237	Protein disulfide-isomerase OS=Homo sapiens OX=9606 GN=P4HB PE=1 SV=3	0	3	3	0.6165	0	1	1	1	574.966	574.966	1722.88	1722.88	-0.68	-0.00039	0/0	0	0	33666976	HCD	MS2	10.8865	2.332	60.635	21685	21685	21674	220428_iNrich_HELA_MG132_Trypsin_08.raw	F12.8	NA	2588	5.58	1	FALSE	9.269e-06	1.362e-06	1.209
High	Sequest HT	Sequest HT (A5)	A	5	Unambiguous	DAPEEEDHVLVLR	[A].dAPEEEDHVLVLR.[K]	1	P07237	P07237	Protein disulfide-isomerase OS=Homo sapiens OX=9606 GN=P4HB PE=1 SV=3	P07237	Protein disulfide-isomerase OS=Homo sapiens OX=9606 GN=P4HB PE=1 SV=3	0	3	3	0.5922	0	1	1	1	574.966	574.966	1722.88	1722.88	-0.36	-0.00021	0/0	0	0	38155772	HCD	MS2	6.51373	2.234	60.6556	21693	21693	21687	220428_iNrich_HELA_MG132_Trypsin_08.raw	F12.8	NA	2549	5.15	1	FALSE	9.269e-06	7.358e-07	1.276
High	Sequest HT	Sequest HT (A5)	A	5	Selected	DAPEEEDHVLVLR	[A].dAPEEEDHVLVLR.[K]	1	P07237	P07237	Protein disulfide-isomerase OS=Homo sapiens OX=9606 GN=P4HB PE=1 SV=3	P07237	Protein disulfide-isomerase OS=Homo sapiens OX=9606 GN=P4HB PE=1 SV=3	0	3	3	0.611	0	1	1	1	574.966	574.966	1722.88	1722.88	-0.36	-0.00021	0/0	0	0	38155772	HCD	MS2	7.67127	2.101	60.6662	21699	21699	21687	220428_iNrich_HELA_MG132_Trypsin_08.raw	F12.8	NA	2549	4.91	1	FALSE	9.269e-06	1.927e-07	1.422
High	Sequest HT	Sequest HT (A5)	A	5	Selected	DAPEEEDHVLVLR	[A].dAPEEEDHVLVLR.[K]	1	P07237	P07237	Protein disulfide-isomerase OS=Homo sapiens OX=9606 GN=P4HB PE=1 SV=3	P07237	Protein disulfide-isomerase OS=Homo sapiens OX=9606 GN=P4HB PE=1 SV=3	0	3	3	0.5123	0	1	1	1	574.966	574.966	1722.88	1722.88	-0.47	-0.00027	0/0	0	0	2.07846e+06	HCD	MS2	55.0909	20.814	60.985	21844	21844	21843	220428_iNrich_HELA_MG132_Trypsin_08.raw	F12.8	NA	2571	4.08	1	FALSE	9.269e-06	1.086e-06	1.234
High	Sequest HT	Sequest HT (A5)	A	5	Unambiguous	DAPEEEDHVLVLR	[A].dAPEEEDHVLVLR.[K]	1	P07237	P07237	Protein disulfide-isomerase OS=Homo sapiens OX=9606 GN=P4HB PE=1 SV=3	P07237	Protein disulfide-isomerase OS=Homo sapiens OX=9606 GN=P4HB PE=1 SV=3	0	3	3	0.4275	0	1	1	1	574.967	574.967	1722.89	1722.88	0.4	0.00023	0/0	0	0	1.76691e+06	HCD	MS2	52.0969	23.072	60.7755	21441	21441	21440	220428_iNrich_HELA_MG132_Trypsin_09.raw	F12.9	NA	2536	3.86	1	FALSE	9.269e-06	3.223e-06	1.116
High	Sequest HT	Sequest HT (A5)	A	5	Selected	DPSKNQGGGLSSSGAGEGQGPKKQTR	[K].dPSkNQGGGLSSSGAGEGQGPkkQTR.[L]	1	P07814	P07814	Bifunctional glutamate/proline--tRNA ligase OS=Homo sapiens OX=9606 GN=EPRS1 PE=1 SV=5	P07814	Bifunctional glutamate/proline--tRNA ligase OS=Homo sapiens OX=9606 GN=EPRS1 PE=1 SV=5	0	3	3	0.5681	0	1	1	1	955.494	955.494	2864.47	2864.46	1.6	0.00153	0/0	0	0	160189	HCD	MS2	6.3066	120	66.7519	17654	17654	17652	200821_HELA_MGTG_iNrich_bRP_F06.raw	F1.6	NA	3257	3.01	1	FALSE	3.982e-05	8.054e-05	0.76
High	Sequest HT	Sequest HT (A5)	A	5	Selected	DPSKNQGGGLSSSGAGEGQGPKKQTR	[K].dPSkNQGGGLSSSGAGEGQGPkkQTR.[L]	1	P07814	P07814	Bifunctional glutamate/proline--tRNA ligase OS=Homo sapiens OX=9606 GN=EPRS1 PE=1 SV=5	P07814	Bifunctional glutamate/proline--tRNA ligase OS=Homo sapiens OX=9606 GN=EPRS1 PE=1 SV=5	0	3	3	0.6785	0	1	1	1	955.49	955.49	2864.46	2864.46	-2.54	-0.00242	0/0	0	0	1.06341e+06	HCD	MS2	2.30152	120	74.4284	20985	20985	20978	200821_HELA_MGTG_iNrich_bRP_F06.raw	F1.6	NA	3347	6.22	1	FALSE	9.269e-06	3.05e-11	2.376
High	Sequest HT	Sequest HT (A5)	A	5	Unambiguous	NRVAVQGDVVR	[Y].nRVAVQGDVVR.[E]	1	P07814	P07814	Bifunctional glutamate/proline--tRNA ligase OS=Homo sapiens OX=9606 GN=EPRS1 PE=1 SV=5	P07814	Bifunctional glutamate/proline--tRNA ligase OS=Homo sapiens OX=9606 GN=EPRS1 PE=1 SV=5	1	3	0	0.4603	0	1	1	1	472.273	472.273	1414.8	1414.8	6.4	0.00302	0/0	0	0	2571485	HCD	MS2	85.9413	8.073	40.519	11292	11292	11287	220428_iNrich_HELA_MG132_Trypsin_11.raw	F12.11	NA	1303	2.39	1	FALSE	0.001888	0.0167	0.194
High	Sequest HT	Sequest HT (A5)	A	5	Selected	DQVANSAFVER	[K].dQVANSAFVER.[L]	1	P07900	P07900	Heat shock protein HSP 90-alpha OS=Homo sapiens OX=9606 GN=HSP90AA1 PE=1 SV=5	P07900	Heat shock protein HSP 90-alpha OS=Homo sapiens OX=9606 GN=HSP90AA1 PE=1 SV=5	0	2	2	0.4836	0	1	1	1	718.864	718.864	1436.72	1436.73	-8.18	-0.00587	0/0	0	0	2763533	HCD	MS2	20.5006	91.426	83.8187	25659	25659	25654	200821_HELA_MGTG_iNrich_bRP_F08.raw	F1.8	NA	2286	3.35	1	FALSE	0.0008582	0.007638	0.276
High	Sequest HT	Sequest HT (A5)	A	5	Unambiguous	NSTMGYMAAKKHLEINPDHSIIETLR	[D].nSTMGYMAAkkHLEINPDHSIIETLR.[Q]	1	P07900	P07900	Heat shock protein HSP 90-alpha OS=Homo sapiens OX=9606 GN=HSP90AA1 PE=1 SV=5	P07900	Heat shock protein HSP 90-alpha OS=Homo sapiens OX=9606 GN=HSP90AA1 PE=1 SV=5	0	4	4	0.5011	0	1	1	1	816.174	816.174	3261.68	3261.67	1.75	0.00143	0/0	0	0	812599	HCD	MS2	63.089	120	102.083	32619	32619	32609	200821_HELA_MGTG_iNrich_bRP_F10.raw	F1.10	NA	3440	4.45	1	FALSE	9.269e-06	1.979e-07	1.419
High	Sequest HT	Sequest HT (A5)	A	5	Unambiguous	NRIPESGGDNSVFDIFELTGAAR	[T].nRIPESGGDNSVFDIFELTGAAR.[K]	1	P07996	P07996	Thrombospondin-1 OS=Homo sapiens OX=9606 GN=THBS1 PE=1 SV=2	P07996	Thrombospondin-1 OS=Homo sapiens OX=9606 GN=THBS1 PE=1 SV=2	1	3	3	0.5778	0	1	1	1	889.779	889.779	2667.32	2667.32	1.1	0.00097	0/0	0	0	1.4794e+06	HCD	MS2	0	120	111.914	37173	37173	37169	200821_HELA_MGTG_iNrich_bRP_F11.raw	F1.11	NA	3135	5.14	1	FALSE	9.269e-06	3.399e-10	2.113
High	Sequest HT	Sequest HT (A5)	A	5	Unambiguous	NRIPESGGDNSVFDIFELTGAAR	[T].nRIPESGGDNSVFDIFELTGAAR.[K]	1	P07996	P07996	Thrombospondin-1 OS=Homo sapiens OX=9606 GN=THBS1 PE=1 SV=2	P07996	Thrombospondin-1 OS=Homo sapiens OX=9606 GN=THBS1 PE=1 SV=2	1	3	3	0.6989	0	1	1	1	889.777	889.777	2667.32	2667.32	-1.36	-0.00121	0/0	0	0	2.2754e+06	HCD	MS2	12.1685	120	109.858	37529	37529	37521	200821_HELA_MGTG_iNrich_bRP_F12.raw	F1.12	NA	3087	6.31	1	FALSE	9.269e-06	3.73e-11	2.354
High	Sequest HT	Sequest HT (A5)	A	5	Selected	NRIPESGGDNSVFDIFELTGAAR	[T].nRIPESGGDNSVFDIFELTGAAR.[K]	1	P07996	P07996	Thrombospondin-1 OS=Homo sapiens OX=9606 GN=THBS1 PE=1 SV=2	P07996	Thrombospondin-1 OS=Homo sapiens OX=9606 GN=THBS1 PE=1 SV=2	1	3	3	0.5876	0	1	1	1	889.781	889.782	2667.33	2667.32	3.55	0.00316	0/0	0	0	2.62672e+06	HCD	MS2	31.8409	109.286	101.21	44076	44076	44073	220621_E_303.raw	F7.3	NA	3200	5.02	1	FALSE	9.269e-06	2.815e-08	1.632
High	Sequest HT	Sequest HT (A5)	A	5	Selected	NRIPESGGDNSVFDIFELTGAAR	[T].nRIPESGGDNSVFDIFELTGAAR.[K]	1	P07996	P07996	Thrombospondin-1 OS=Homo sapiens OX=9606 GN=THBS1 PE=1 SV=2	P07996	Thrombospondin-1 OS=Homo sapiens OX=9606 GN=THBS1 PE=1 SV=2	1	3	3	0.5263	0	1	1	1	889.777	889.778	2667.32	2667.32	-0.81	-0.00072	0/0	0	0	737597	HCD	MS2	0	120	101.737	44308	44308	44307	220621_E_303.raw	F7.3	NA	3061	5.13	1	FALSE	9.269e-06	1.075e-06	1.235
High	Sequest HT	Sequest HT (A5)	A	5	Selected	NRIPESGGDNSVFDIFELTGAAR	[T].nRIPESGGDNSVFDIFELTGAAR.[K]	1	P07996	P07996	Thrombospondin-1 OS=Homo sapiens OX=9606 GN=THBS1 PE=1 SV=2	P07996	Thrombospondin-1 OS=Homo sapiens OX=9606 GN=THBS1 PE=1 SV=2	1	3	3	0.2628	0	1	1	1	889.778	889.779	2667.32	2667.32	0.14	0.00012	0/0	0	0	532730	HCD	MS2	17.5141	120	102.766	44780	44780	44775	220621_E_303.raw	F7.3	NA	3136	2.93	1	FALSE	9.666e-05	0.000707	0.518
High	Sequest HT	Sequest HT (A5)	A	5	Selected	DCGLPPDVPNAQPALEGR	[G].dcGLPPDVPNAQPALEGR.[T]	1	P08174	P08174	Complement decay-accelerating factor OS=Homo sapiens OX=9606 GN=CD55 PE=1 SV=4	P08174	Complement decay-accelerating factor OS=Homo sapiens OX=9606 GN=CD55 PE=1 SV=4	0	3	3	0.6084	0	1	1	1	703.019	703.019	2107.04	2107.04	0.31	0.00022	0/0	0	0	1.29007e+06	HCD	MS2	0	120	82.1435	24857	24857	24845	200821_HELA_MGTG_iNrich_bRP_F11.raw	F1.11	NA	2779	5.21	1	FALSE	9.269e-06	2.158e-08	1.661
High	Sequest HT	Sequest HT (A5)	A	5	Unambiguous	DCGLPPDVPNAQPALEGR	[G].dcGLPPDVPNAQPALEGR.[T]	1	P08174	P08174	Complement decay-accelerating factor OS=Homo sapiens OX=9606 GN=CD55 PE=1 SV=4	P08174	Complement decay-accelerating factor OS=Homo sapiens OX=9606 GN=CD55 PE=1 SV=4	0	2	2	0.4951	0	1	1	1	1054.03	1054.03	2107.05	2107.04	4.49	0.00473	0/0	0	0	636972	HCD	MS2	0	120	82.1813	24872	24872	24871	200821_HELA_MGTG_iNrich_bRP_F11.raw	F1.11	NA	2829	3.05	1	FALSE	4.57e-05	0.0002952	0.612
High	Sequest HT	Sequest HT (A5)	A	5	Selected	DCGLPPDVPNAQPALEGR	[G].dcGLPPDVPNAQPALEGR.[T]	1	P08174	P08174	Complement decay-accelerating factor OS=Homo sapiens OX=9606 GN=CD55 PE=1 SV=4	P08174	Complement decay-accelerating factor OS=Homo sapiens OX=9606 GN=CD55 PE=1 SV=4	0	3	3	0.627	0	1	1	1	703.019	703.019	2107.04	2107.04	-0.12	-9e-05	0/0	0	0	2.36457e+06	HCD	MS2	64.3071	120	82.6723	25076	25076	25066	200821_HELA_MGTG_iNrich_bRP_F11.raw	F1.11	NA	2727	5.71	1	FALSE	9.269e-06	3.331e-10	2.115
High	Sequest HT	Sequest HT (A5)	A	5	Unambiguous	DCGLPPDVPNAQPALEGR	[G].dcGLPPDVPNAQPALEGR.[T]	1	P08174	P08174	Complement decay-accelerating factor OS=Homo sapiens OX=9606 GN=CD55 PE=1 SV=4	P08174	Complement decay-accelerating factor OS=Homo sapiens OX=9606 GN=CD55 PE=1 SV=4	0	2	2	0.6403	0	1	1	1	1054.02	1054.02	2107.04	2107.04	-0.15	-0.00015	0/0	0	0	1.80443e+06	HCD	MS2	0	120	82.7138	25093	25093	25092	200821_HELA_MGTG_iNrich_bRP_F11.raw	F1.11	NA	2725	4.81	1	FALSE	9.269e-06	1.286e-08	1.717
High	Sequest HT	Sequest HT (A5)	A	5	Unambiguous	DCGLPPDVPNAQPALEGR	[G].dcGLPPDVPNAQPALEGR.[T]	1	P08174	P08174	Complement decay-accelerating factor OS=Homo sapiens OX=9606 GN=CD55 PE=1 SV=4	P08174	Complement decay-accelerating factor OS=Homo sapiens OX=9606 GN=CD55 PE=1 SV=4	0	3	3	0.5398	0	1	1	1	703.017	703.017	2107.04	2107.04	-3.6	-0.00253	0/0	0	0	1.6893e+06	HCD	MS2	49.0356	52.241	83.1978	25302	25302	25300	200821_HELA_MGTG_iNrich_bRP_F11.raw	F1.11	NA	2639	3.39	1	FALSE	3.982e-05	0.0002072	0.652
High	Sequest HT	Sequest HT (A5)	A	5	Unambiguous	DCGLPPDVPNAQPALEGR	[G].dcGLPPDVPNAQPALEGR.[T]	1	P08174	P08174	Complement decay-accelerating factor OS=Homo sapiens OX=9606 GN=CD55 PE=1 SV=4	P08174	Complement decay-accelerating factor OS=Homo sapiens OX=9606 GN=CD55 PE=1 SV=4	0	2	2	0.5739	0	1	1	1	1054.03	1054.03	2107.05	2107.04	1.25	0.00131	0/0	0	0	700623	HCD	MS2	0	120	83.2505	25324	25324	25313	200821_HELA_MGTG_iNrich_bRP_F11.raw	F1.11	NA	2764	3.45	1	FALSE	9.269e-06	9.308e-06	1
High	Sequest HT	Sequest HT (A5)	A	5	Unambiguous	DCGLPPDVPNAQPALEGR	[G].dcGLPPDVPNAQPALEGR.[T]	1	P08174	P08174	Complement decay-accelerating factor OS=Homo sapiens OX=9606 GN=CD55 PE=1 SV=4	P08174	Complement decay-accelerating factor OS=Homo sapiens OX=9606 GN=CD55 PE=1 SV=4	0	3	3	0.5172	0	1	1	1	703.019	703.019	2107.04	2107.04	-0.19	-0.00013	0/0	0	0	947215	HCD	MS2	29.9567	120	80.6217	25285	25285	25280	200821_HELA_MGTG_iNrich_bRP_F12.raw	F1.12	NA	2717	4.35	1	FALSE	9.269e-06	6.585e-06	1.038
High	Sequest HT	Sequest HT (A5)	A	5	Selected	DCGLPPDVPNAQPALEGR	[G].dcGLPPDVPNAQPALEGR.[T]	1	P08174	P08174	Complement decay-accelerating factor OS=Homo sapiens OX=9606 GN=CD55 PE=1 SV=4	P08174	Complement decay-accelerating factor OS=Homo sapiens OX=9606 GN=CD55 PE=1 SV=4	0	3	3	0.3127	0	1	1	1	703.02	703.02	2107.05	2107.04	1.79	0.00126	0/0	0	0	2.80654e+06	HCD	MS2	51.5311	60.777	69.8665	30442	30442	30436	220621_E_201.raw	F6.1	NA	2769	3.39	1	FALSE	3.982e-05	8.282e-05	0.757
High	Sequest HT	Sequest HT (A5)	A	5	Unambiguous	DCGLPPDVPNAQPALEGR	[G].dcGLPPDVPNAQPALEGR.[T]	1	P08174	P08174	Complement decay-accelerating factor OS=Homo sapiens OX=9606 GN=CD55 PE=1 SV=4	P08174	Complement decay-accelerating factor OS=Homo sapiens OX=9606 GN=CD55 PE=1 SV=4	0	2	2	0.5209	0	1	1	1	1054.03	1054.03	2107.05	2107.04	1.96	0.00206	0/0	0	0	1.151e+06	HCD	MS2	0	87.53	70.4679	30418	30418	30410	220621_E_202.raw	F6.2	NA	2805	4.07	1	FALSE	9.269e-06	1.386e-05	0.956
High	Sequest HT	Sequest HT (A5)	A	5	Unambiguous	DCGLPPDVPNAQPALEGR	[G].dcGLPPDVPNAQPALEGR.[T]	1	P08174	P08174	Complement decay-accelerating factor OS=Homo sapiens OX=9606 GN=CD55 PE=1 SV=4	P08174	Complement decay-accelerating factor OS=Homo sapiens OX=9606 GN=CD55 PE=1 SV=4	0	2	2	0.5044	0	1	1	1	1054.02	1054.02	2107.04	2107.04	-0.68	-0.00072	0/0	0	0	1.45599e+06	HCD	MS2	0	83.55	71.1597	30811	30811	30800	220621_E_202.raw	F6.2	NA	2739	3.39	1	FALSE	9.666e-05	0.0006308	0.53
High	Sequest HT	Sequest HT (A5)	A	5	Selected	DCGLPPDVPNAQPALEGR	[G].dcGLPPDVPNAQPALEGR.[T]	1	P08174	P08174	Complement decay-accelerating factor OS=Homo sapiens OX=9606 GN=CD55 PE=1 SV=4	P08174	Complement decay-accelerating factor OS=Homo sapiens OX=9606 GN=CD55 PE=1 SV=4	0	3	3	0.3126	0	1	1	1	703.019	703.019	2107.04	2107.04	-0.63	-0.00044	0/0	0	0	1.98803e+06	HCD	MS2	21.386	64.76	71.3469	30923	30923	30917	220621_E_202.raw	F6.2	NA	2722	4.35	1	FALSE	0.0003072	0.002366	0.393
High	Sequest HT	Sequest HT (A5)	A	5	Selected	DCGLPPDVPNAQPALEGR	[G].dcGLPPDVPNAQPALEGR.[T]	1	P08174	P08174	Complement decay-accelerating factor OS=Homo sapiens OX=9606 GN=CD55 PE=1 SV=4	P08174	Complement decay-accelerating factor OS=Homo sapiens OX=9606 GN=CD55 PE=1 SV=4	0	3	0	0.5369	0	1	1	1	703.02	703.02	2107.05	2107.04	1.5	0.00106	0/0	0	0	2.91092e+06	HCD	MS2	85.3734	85.443	70.6233	29056	29056	29045	220621_E_301.raw	F7.1	NA	2776	5.01	1	FALSE	3.982e-05	8.304e-05	0.757
High	Sequest HT	Sequest HT (A5)	A	5	Unambiguous	DCGLPPDVPNAQPALEGR	[G].dcGLPPDVPNAQPALEGR.[T]	1	P08174	P08174	Complement decay-accelerating factor OS=Homo sapiens OX=9606 GN=CD55 PE=1 SV=4	P08174	Complement decay-accelerating factor OS=Homo sapiens OX=9606 GN=CD55 PE=1 SV=4	0	3	3	0.5659	0	1	1	1	703.02	703.02	2107.04	2107.04	0.86	0.00061	0/0	0	0	3.84411e+06	HCD	MS2	5.45821	57.653	71.1762	29334	29334	29331	220621_E_301.raw	F7.1	NA	2813	5.69	1	FALSE	9.269e-06	6.408e-09	1.793
High	Sequest HT	Sequest HT (A5)	A	5	Unambiguous	DCGLPPDVPNAQPALEGR	[G].dcGLPPDVPNAQPALEGR.[T]	1	P08174	P08174	Complement decay-accelerating factor OS=Homo sapiens OX=9606 GN=CD55 PE=1 SV=4	P08174	Complement decay-accelerating factor OS=Homo sapiens OX=9606 GN=CD55 PE=1 SV=4	0	2	2	0.587	0	1	1	1	1054.03	1054.03	2107.05	2107.04	1.84	0.00194	0/0	0	0	1.49255e+06	HCD	MS2	0	120	71.3858	29443	29443	29435	220621_E_301.raw	F7.1	NA	2759	4.77	1	FALSE	9.269e-06	4.923e-07	1.32
High	Sequest HT	Sequest HT (A5)	A	5	Selected	DCGLPPDVPNAQPALEGR	[G].dcGLPPDVPNAQPALEGR.[T]	1	P08174	P08174	Complement decay-accelerating factor OS=Homo sapiens OX=9606 GN=CD55 PE=1 SV=4	P08174	Complement decay-accelerating factor OS=Homo sapiens OX=9606 GN=CD55 PE=1 SV=4	0	3	3	0.4646	0	1	1	1	703.017	703.017	2107.04	2107.04	-2.47	-0.00173	0/0	0	0	2304572	HCD	MS2	25.8964	76.812	71.7133	29607	29607	29604	220621_E_301.raw	F7.1	NA	2687	5.51	1	FALSE	9.269e-06	2.872e-07	1.379
High	Sequest HT	Sequest HT (A5)	A	5	Selected	DCGLPPDVPNAQPALEGR	[G].dcGLPPDVPNAQPALEGR.[T]	1	P08174	P08174	Complement decay-accelerating factor OS=Homo sapiens OX=9606 GN=CD55 PE=1 SV=4	P08174	Complement decay-accelerating factor OS=Homo sapiens OX=9606 GN=CD55 PE=1 SV=4	0	3	3	0.3197	0	1	1	1	703.018	703.018	2107.04	2107.04	-2.21	-0.00155	0/0	0	0	3.40651e+06	HCD	MS2	30.7827	69.74	71.7991	29653	29653	29643	220621_E_301.raw	F7.1	NA	2679	4.63	1	FALSE	9.269e-06	1.185e-06	1.225
High	Sequest HT	Sequest HT (A5)	A	5	Selected	DCGLPPDVPNAQPALEGR	[G].dcGLPPDVPNAQPALEGR.[T]	1	P08174	P08174	Complement decay-accelerating factor OS=Homo sapiens OX=9606 GN=CD55 PE=1 SV=4	P08174	Complement decay-accelerating factor OS=Homo sapiens OX=9606 GN=CD55 PE=1 SV=4	0	3	3	0.2117	0	1	1	1	703.018	703.018	2107.04	2107.04	-0.95	-0.00067	0/0	0	0	1.71514e+06	HCD	MS2	21.0959	32.326	71.2622	28570	28570	28564	220621_E_302.raw	F7.2	NA	2757	3.59	1	FALSE	3.982e-05	0.0001251	0.71
High	Sequest HT	Sequest HT (A5)	A	5	Unambiguous	DCGLPPDVPNAQPALEGR	[G].dcGLPPDVPNAQPALEGR.[T]	1	P08174	P08174	Complement decay-accelerating factor OS=Homo sapiens OX=9606 GN=CD55 PE=1 SV=4	P08174	Complement decay-accelerating factor OS=Homo sapiens OX=9606 GN=CD55 PE=1 SV=4	0	2	2	0.5028	0	1	1	1	1054.03	1054.03	2107.05	2107.04	1.52	0.0016	0/0	0	0	619345	HCD	MS2	12.6987	120	71.2722	28575	28575	28564	220621_E_302.raw	F7.2	NA	2776	3.52	1	FALSE	9.516e-05	0.0004947	0.556
High	Sequest HT	Sequest HT (A5)	A	5	Unambiguous	DCGLPPDVPNAQPALEGR	[G].dcGLPPDVPNAQPALEGR.[T]	1	P08174	P08174	Complement decay-accelerating factor OS=Homo sapiens OX=9606 GN=CD55 PE=1 SV=4	P08174	Complement decay-accelerating factor OS=Homo sapiens OX=9606 GN=CD55 PE=1 SV=4	0	3	3	0.5908	0	1	1	1	703.019	703.019	2107.04	2107.04	0.47	0.00033	0/0	0	0	4.22733e+06	HCD	MS2	38.8975	26.07	71.7822	28825	28825	28824	220621_E_302.raw	F7.2	NA	2832	5.01	1	FALSE	9.269e-06	1.435e-07	1.454
High	Sequest HT	Sequest HT (A5)	A	5	Unambiguous	DCGLPPDVPNAQPALEGR	[G].dcGLPPDVPNAQPALEGR.[T]	1	P08174	P08174	Complement decay-accelerating factor OS=Homo sapiens OX=9606 GN=CD55 PE=1 SV=4	P08174	Complement decay-accelerating factor OS=Homo sapiens OX=9606 GN=CD55 PE=1 SV=4	0	2	2	0.5807	0	1	1	1	1054.03	1054.03	2107.04	2107.04	0.85	0.0009	0/0	0	0	2025526	HCD	MS2	0	120	71.7848	28826	28826	28824	220621_E_302.raw	F7.2	NA	2821	4.77	1	FALSE	9.269e-06	8.747e-09	1.759
High	Sequest HT	Sequest HT (A5)	A	5	Selected	DCGLPPDVPNAQPALEGR	[G].dcGLPPDVPNAQPALEGR.[T]	1	P08174	P08174	Complement decay-accelerating factor OS=Homo sapiens OX=9606 GN=CD55 PE=1 SV=4	P08174	Complement decay-accelerating factor OS=Homo sapiens OX=9606 GN=CD55 PE=1 SV=4	0	3	3	0.6206	0	1	1	1	703.019	703.019	2107.04	2107.04	-0.71	-0.0005	0/0	0	0	3.79669e+06	HCD	MS2	9.44543	55.978	72.3126	29086	29086	29084	220621_E_302.raw	F7.2	NA	2760	5.64	1	FALSE	9.269e-06	6.005e-07	1.299
High	Sequest HT	Sequest HT (A5)	A	5	Unambiguous	DCGLPPDVPNAQPALEGR	[G].dcGLPPDVPNAQPALEGR.[T]	1	P08174	P08174	Complement decay-accelerating factor OS=Homo sapiens OX=9606 GN=CD55 PE=1 SV=4	P08174	Complement decay-accelerating factor OS=Homo sapiens OX=9606 GN=CD55 PE=1 SV=4	0	2	2	0.615	0	1	1	1	1054.02	1054.02	2107.04	2107.04	-1.08	-0.00114	0/0	0	0	1.77777e+06	HCD	MS2	0	100.891	72.3414	29102	29102	29097	220621_E_302.raw	F7.2	NA	2791	4.39	1	FALSE	9.269e-06	8.206e-08	1.515
High	Sequest HT	Sequest HT (A5)	A	5	Unambiguous	DCGLPPDVPNAQPALEGR	[G].dcGLPPDVPNAQPALEGR.[T]	1	P08174	P08174	Complement decay-accelerating factor OS=Homo sapiens OX=9606 GN=CD55 PE=1 SV=4	P08174	Complement decay-accelerating factor OS=Homo sapiens OX=9606 GN=CD55 PE=1 SV=4	0	2	2	0.5542	0	1	1	1	1054.03	1054.03	2107.04	2107.04	0.7	0.00073	0/0	0	0	955558	HCD	MS2	15.0155	120	72.8628	29364	29364	29357	220621_E_302.raw	F7.2	NA	2817	3.97	1	FALSE	9.269e-06	4.531e-05	0.825
High	Sequest HT	Sequest HT (A5)	A	5	Unambiguous	DCGLPPDVPNAQPALEGR	[G].dcGLPPDVPNAQPALEGR.[T]	1	P08174	P08174	Complement decay-accelerating factor OS=Homo sapiens OX=9606 GN=CD55 PE=1 SV=4	P08174	Complement decay-accelerating factor OS=Homo sapiens OX=9606 GN=CD55 PE=1 SV=4	0	2	2	0.4815	0	1	1	1	1054.02	1054.02	2107.04	2107.04	-0.41	-0.00043	0/0	0	0	667817	HCD	MS2	0	120	73.4945	29674	29674	29669	220621_E_302.raw	F7.2	NA	2735	3.24	1	FALSE	9.666e-05	0.0006975	0.519
High	Sequest HT	Sequest HT (A5)	A	5	Selected	DCGLPPDVPNAQPALEGR	[G].dcGLPPDVPNAQPALEGR.[T]	1	P08174	P08174	Complement decay-accelerating factor OS=Homo sapiens OX=9606 GN=CD55 PE=1 SV=4	P08174	Complement decay-accelerating factor OS=Homo sapiens OX=9606 GN=CD55 PE=1 SV=4	0	3	3	0.5244	0	1	1	1	703.019	703.02	2107.04	2107.04	0.44	0.00031	0/0	0	0	796905	HCD	MS2	40.2804	113.82	70.9187	29108	29108	29097	220621_E_303.raw	F7.3	NA	2820	5.13	1	FALSE	9.269e-06	8.408e-06	1.011
High	Sequest HT	Sequest HT (A5)	A	5	Unambiguous	NTEFKNTR	[I].nTEFkNTR.[T]	1	P08670	P08670	Vimentin OS=Homo sapiens OX=9606 GN=VIM PE=1 SV=4	P08670	Vimentin OS=Homo sapiens OX=9606 GN=VIM PE=1 SV=4	0	2	2	0.2103	0	1	1	1	628.827	628.827	1256.65	1256.65	-2.45	-0.00154	0/0	0	0	1.34784e+06	HCD	MS2	69.9691	120	56.605	13534	13534	13530	200821_HELA_MGTG_iNrich_bRP_F04.raw	F1.4	NoneMonoisotopic	1956	2.14	1	FALSE	0.003614	0.03197	0.12
High	Sequest HT	Sequest HT (A5)	A	5	Selected	QVDQLTNDKAR	[R].qVDQLTNDkAR.[V]	1	P08670	P08670	Vimentin OS=Homo sapiens OX=9606 GN=VIM PE=1 SV=4	P08670	Vimentin OS=Homo sapiens OX=9606 GN=VIM PE=1 SV=4	0	2	2	0.2145	0	1	1	1	767.908	767.908	1534.81	1534.81	-0.31	-0.00024	0/0	0	0	1.99347e+06	HCD	MS2	7.38006	69.552	66.3916	17206	17206	17201	200925_HELA_iNrich_bRP_F03.raw	F2.3	NA	2588	2.89	1	FALSE	0.005478	0.05189	0.068
High	Sequest HT	Sequest HT (A5)	A	5	Unambiguous	QVDQLTNDKAR	[R].qVDQLTNDkAR.[V]	1	P08670	P08670	Vimentin OS=Homo sapiens OX=9606 GN=VIM PE=1 SV=4	P08670	Vimentin OS=Homo sapiens OX=9606 GN=VIM PE=1 SV=4	0	2	2	0.3843	0	1	1	1	767.907	767.907	1534.81	1534.81	-1.44	-0.0011	0/0	0	0	1672463	HCD	MS2	20.866	117.153	69.0682	18410	18410	18399	200925_HELA_iNrich_bRP_F04.raw	F2.4	NA	2407	2.81	1	FALSE	0.0002075	0.001576	0.435
High	Sequest HT	Sequest HT (A5)	A	5	Selected	QVDQLTNDKAR	[R].qVDQLTNDkAR.[V]	1	P08670	P08670	Vimentin OS=Homo sapiens OX=9606 GN=VIM PE=1 SV=4	P08670	Vimentin OS=Homo sapiens OX=9606 GN=VIM PE=1 SV=4	0	2	2	0.4471	0	1	1	1	767.908	767.908	1534.81	1534.81	0.22	0.00017	0/0	0	0	1872362	HCD	MS2	51.4815	54.837	70.2824	18940	18940	18932	200925_HELA_iNrich_bRP_F04.raw	F2.4	NA	2506	3.31	1	FALSE	9.269e-06	2.833e-06	1.13
High	Sequest HT	Sequest HT (A5)	A	5	Selected	QVDQLTNDKAR	[R].qVDQLTNDkAR.[V]	1	P08670	P08670	Vimentin OS=Homo sapiens OX=9606 GN=VIM PE=1 SV=4	P08670	Vimentin OS=Homo sapiens OX=9606 GN=VIM PE=1 SV=4	0	3	3	0.3362	0	1	1	1	512.274	512.274	1534.81	1534.81	-0.54	-0.00028	0/0	0	0	1.0597e+06	HCD	MS2	11.97	75.711	70.2895	18944	18944	18932	200925_HELA_iNrich_bRP_F04.raw	F2.4	NA	2556	3.45	1	FALSE	0.0008651	0.007714	0.275
High	Sequest HT	Sequest HT (A5)	A	5	Selected	QVDQLTNDKAR	[R].qVDQLTNDkAR.[V]	1	P08670	P08670	Vimentin OS=Homo sapiens OX=9606 GN=VIM PE=1 SV=4	P08670	Vimentin OS=Homo sapiens OX=9606 GN=VIM PE=1 SV=4	0	2	2	0.5	0	1	1	1	767.908	767.908	1534.81	1534.81	0.14	0.0001	0/0	0	0	3.26075e+06	HCD	MS2	44.8009	42.672	69.9705	18402	18402	18392	200925_HELA_iNrich_bRP_F05.raw	F2.5	NA	2513	2.88	1	FALSE	3.982e-05	0.0002108	0.65
High	Sequest HT	Sequest HT (A5)	A	5	Unambiguous	NEKVELQELNDR	[T].nEkVELQELNDR.[F]	2	P17661; P08670	P17661	Desmin OS=Homo sapiens OX=9606 GN=DES PE=1 SV=3;Vimentin OS=Homo sapiens OX=9606 GN=VIM PE=1 SV=4	P17661; P08670	Desmin OS=Homo sapiens OX=9606 GN=DES PE=1 SV=3; Vimentin OS=Homo sapiens OX=9606 GN=VIM PE=1 SV=4	0	2	2	0.3592	0	1	1	1	867.454	867.454	1733.9	1733.89	3.74	0.00324	0/0	0	0	394322	HCD	MS2	38.6767	120	96.7968	28218	28218	28207	200925_HELA_iNrich_bRP_F07.raw	F2.7	NA	2578	2.45	2	FALSE	0.001	0.008975	0.26
High	Sequest HT	Sequest HT (A5)	A	5	Unambiguous	NEKVELQELNDR	[T].nEkVELQELNDR.[F]	2	P17661; P08670	P17661	Desmin OS=Homo sapiens OX=9606 GN=DES PE=1 SV=3;Vimentin OS=Homo sapiens OX=9606 GN=VIM PE=1 SV=4	P17661; P08670	Desmin OS=Homo sapiens OX=9606 GN=DES PE=1 SV=3; Vimentin OS=Homo sapiens OX=9606 GN=VIM PE=1 SV=4	0	2	2	0.2108	0	1	1	1	867.447	867.447	1733.89	1733.89	-4.37	-0.00379	0/0	0	0	758033	HCD	MS2	0	120	108.799	32873	32873	32862	200925_HELA_iNrich_bRP_F07.raw	F2.7	NA	2580	1.85	2	FALSE	0.00896	0.08567	0.013
High	Sequest HT	Sequest HT (A5)	A	5	Unambiguous	NEKVELQELNDR	[T].nEkVELQELNDR.[F]	2	P17661; P08670	P17661	Desmin OS=Homo sapiens OX=9606 GN=DES PE=1 SV=3;Vimentin OS=Homo sapiens OX=9606 GN=VIM PE=1 SV=4	P17661; P08670	Desmin OS=Homo sapiens OX=9606 GN=DES PE=1 SV=3; Vimentin OS=Homo sapiens OX=9606 GN=VIM PE=1 SV=4	0	2	2	0.2018	0	1	1	1	867.445	867.445	1733.88	1733.89	-5.71	-0.00495	0/0	0	0	7984341	HCD	MS2	11.6774	21.733	110.332	33486	33486	33483	200925_HELA_iNrich_bRP_F07.raw	F2.7	NA	2672	2.18	2	FALSE	0.00842	0.08016	0.021
High	Sequest HT	Sequest HT (A5)	A	5	Selected	QVQSLTCEVDALKGTNESLER	[R].qVQSLTcEVDALkGTNESLER.[Q]	1	P08670	P08670	Vimentin OS=Homo sapiens OX=9606 GN=VIM PE=1 SV=4	P08670	Vimentin OS=Homo sapiens OX=9606 GN=VIM PE=1 SV=4	0	3	3	0.3886	0	1	1	1	875.44	875.44	2624.3	2624.31	-2.18	-0.00191	0/0	0	0	3.22385e+06	HCD	MS2	0	93.178	107.368	35844	35844	35832	200925_HELA_iNrich_bRP_F10.raw	F2.10	NA	3029	4.4	1	FALSE	0.005015	0.04642	0.08
High	Sequest HT	Sequest HT (A5)	A	5	Selected	QVQSLTCEVDALKGTNESLER	[R].qVQSLTcEVDALkGTNESLER.[Q]	1	P08670	P08670	Vimentin OS=Homo sapiens OX=9606 GN=VIM PE=1 SV=4	P08670	Vimentin OS=Homo sapiens OX=9606 GN=VIM PE=1 SV=4	0	3	0	0.4	0	1	1	1	875.448	875.448	2624.33	2624.31	7.2	0.0063	0/0	0	0	7.37331e+06	HCD	MS2	66.9901	47.744	92.2162	41641	41641	41629	220621_E_103.raw	F5.3	NoneMonoisotopic	3175	5.7	1	FALSE	9.269e-06	1.383e-05	0.956
High	Sequest HT	Sequest HT (A5)	A	5	Selected	QVDQLTNDKAR	[R].qVDQLTNDkAR.[V]	1	P08670	P08670	Vimentin OS=Homo sapiens OX=9606 GN=VIM PE=1 SV=4	P08670	Vimentin OS=Homo sapiens OX=9606 GN=VIM PE=1 SV=4	0	2	2	0.4251	0	1	1	1	767.911	767.911	1534.82	1534.81	4.07	0.00313	0/0	0	0	1.13632e+06	HCD	MS2	50.3788	104.91	53.9216	20983	20983	20972	220621_E_106.raw	F5.6	NA	2358	3.34	1	FALSE	0.0005992	0.005184	0.315
High	Sequest HT	Sequest HT (A5)	A	5	Unambiguous	EEWYKSKFADLSEAANRNNDALR	[A].eEWYkSkFADLSEAANRNNDALR.[Q]	1	P08670	P08670	Vimentin OS=Homo sapiens OX=9606 GN=VIM PE=1 SV=4	P08670	Vimentin OS=Homo sapiens OX=9606 GN=VIM PE=1 SV=4	1	3	0	0.4104	0	1	1	1	1006.83	1006.83	3018.48	3018.5	-7.56	-0.0076	0/0	0	0	3.7965e+06	HCD	MS2	79.0124	94.942	110.51	47877	47877	47869	220621_E_110.raw	F5.10	NoneMonoisotopic	3119	4.24	1	FALSE	1.762e-05	5.725e-05	0.799
High	Sequest HT	Sequest HT (A5)	A	5	Selected	QVDQLTNDKAR	[R].qVDQLTNDkAR.[V]	1	P08670	P08670	Vimentin OS=Homo sapiens OX=9606 GN=VIM PE=1 SV=4	P08670	Vimentin OS=Homo sapiens OX=9606 GN=VIM PE=1 SV=4	0	2	2	0.1933	0	1	1	1	767.909	767.909	1534.81	1534.81	0.97	0.00075	0/0	0	0	1.94191e+06	HCD	MS2	23.321	94.053	46.4374	16350	16350	16344	220621_E_112.raw	F5.12	NA	2445	2.69	1	FALSE	0.005077	0.04757	0.077
High	Sequest HT	Sequest HT (A5)	A	5	Unambiguous	QVQSLTCEVDALKGTNESLER	[R].qVQSLTcEVDALkGTNESLER.[Q]	1	P08670	P08670	Vimentin OS=Homo sapiens OX=9606 GN=VIM PE=1 SV=4	P08670	Vimentin OS=Homo sapiens OX=9606 GN=VIM PE=1 SV=4	0	3	0	0.4414	0	1	1	1	875.446	875.446	2624.32	2624.31	5.02	0.00439	0/0	0	0	6.69778e+06	HCD	MS2	79.612	43.934	90.6416	42744	42744	42734	220621_E_204.raw	F6.4	NoneMonoisotopic	3108	5.8	1	FALSE	9.269e-06	1.154e-05	0.976
High	Sequest HT	Sequest HT (A5)	A	5	Unambiguous	QVDQLTNDKAR	[R].qVDQLTNDkAR.[V]	1	P08670	P08670	Vimentin OS=Homo sapiens OX=9606 GN=VIM PE=1 SV=4	P08670	Vimentin OS=Homo sapiens OX=9606 GN=VIM PE=1 SV=4	0	2	0	0.4065	0	1	1	1	767.908	767.908	1534.81	1534.81	-0.87	-0.00067	0/0	0	0	5103273	HCD	MS2	64.5381	37.74	56.1935	21528	21528	21518	220621_E_207.raw	F6.7	NA	2550	2.78	1	FALSE	9.269e-06	3.951e-06	1.093
High	Sequest HT	Sequest HT (A5)	A	5	Selected	DVSKPDLTAALR	[V].dVSkPDLTAALR.[D]	1	P08670	P08670	Vimentin OS=Homo sapiens OX=9606 GN=VIM PE=1 SV=4	P08670	Vimentin OS=Homo sapiens OX=9606 GN=VIM PE=1 SV=4	0	2	2	0.3185	0	1	1	1	766.439	766.439	1531.87	1531.87	-0.53	-0.0004	0/0	0	0	1.95716e+06	HCD	MS2	25.2875	74.614	75.3592	33064	33064	33062	220621_E_211.raw	F6.11	NA	1433	3.14	1	FALSE	0.004008	0.03555	0.109
High	Sequest HT	Sequest HT (A5)	A	5	Unambiguous	QVQSLTCEVDALKGTNESLER	[R].qVQSLTcEVDALkGTNESLER.[Q]	1	P08670	P08670	Vimentin OS=Homo sapiens OX=9606 GN=VIM PE=1 SV=4	P08670	Vimentin OS=Homo sapiens OX=9606 GN=VIM PE=1 SV=4	0	3	0	0.3188	0	1	1	1	875.448	875.447	2624.33	2624.31	6.78	0.00593	0/0	0	0	7189276	HCD	MS2	64.4027	20.995	91.8288	38511	38511	38509	220621_E_304.raw	F7.4	NoneMonoisotopic	3129	3.89	1	FALSE	9.269e-06	2.753e-06	1.133
High	Sequest HT	Sequest HT (A5)	A	5	Selected	QVDQLTNDKAR	[R].qVDQLTNDkAR.[V]	1	P08670	P08670	Vimentin OS=Homo sapiens OX=9606 GN=VIM PE=1 SV=4	P08670	Vimentin OS=Homo sapiens OX=9606 GN=VIM PE=1 SV=4	0	2	2	0.401	0	1	1	1	767.907	767.907	1534.81	1534.81	-1.25	-0.00096	0/0	0	0	1.0314e+06	HCD	MS2	60.1922	120	56.1277	19709	19709	19698	220621_E_307.raw	F7.7	NA	2531	1.97	1	FALSE	4.57e-05	0.0002785	0.619
High	Sequest HT	Sequest HT (A5)	A	5	Unambiguous	QVQSLTCEVDALKGTNESLER	[R].qVQSLTcEVDALkGTNESLER.[Q]	1	P08670	P08670	Vimentin OS=Homo sapiens OX=9606 GN=VIM PE=1 SV=4	P08670	Vimentin OS=Homo sapiens OX=9606 GN=VIM PE=1 SV=4	0	3	0	0.2793	0	1	1	1	875.446	875.446	2624.32	2624.31	5.58	0.00488	0/0	0	0	2.17431e+06	HCD	MS2	67.9155	108.804	89.7942	35919	35919	35909	220428_iNrich_HELA_MG132_Trypsin_04.raw	F12.4	NA	3138	4.01	1	FALSE	0.0006309	0.005435	0.311
High	Sequest HT	Sequest HT (A5)	A	5	Selected	QDEIQNMKEEMAR	[L].qDEIQNMkEEMAR.[H]	1	P08670	P08670	Vimentin OS=Homo sapiens OX=9606 GN=VIM PE=1 SV=4	P08670	Vimentin OS=Homo sapiens OX=9606 GN=VIM PE=1 SV=4	0	2	2	0.5176	0	1	1	1	934.947	934.947	1868.89	1868.87	6.01	0.00561	0/0	0	0	152426	HCD	MS2	31.7305	120	113.733	43469	43469	43462	220428_iNrich_HELA_MG132_Trypsin_10.raw	F12.10	NA	1985	2.84	1	FALSE	3.982e-05	0.0001034	0.732
High	Sequest HT	Sequest HT (A5)	A	5	Unambiguous	QSLLAPLRLDADPSLQR	[N].qSLLAPLRLDADPSLQR.[V]	1	P08729	P08729	Keratin, type II cytoskeletal 7 OS=Homo sapiens OX=9606 GN=KRT7 PE=1 SV=5	P08729	Keratin, type II cytoskeletal 7 OS=Homo sapiens OX=9606 GN=KRT7 PE=1 SV=5	1	3	3	0.3969	0	1	1	1	699.061	699.061	2095.17	2095.17	-1.29	-0.0009	0/0	0	0	2.43879e+06	HCD	MS2	57.035	98.242	96.2033	31369	31369	31357	200821_HELA_MGTG_iNrich_bRP_F03.raw	F1.3	NA	1652	3.83	1	FALSE	9.269e-06	2.331e-06	1.151
High	Sequest HT	Sequest HT (A5)	A	5	Selected	QSLLAPLR	[N].qSLLAPLR.[L]	1	P08729	P08729	Keratin, type II cytoskeletal 7 OS=Homo sapiens OX=9606 GN=KRT7 PE=1 SV=5	P08729	Keratin, type II cytoskeletal 7 OS=Homo sapiens OX=9606 GN=KRT7 PE=1 SV=5	0	2	2	0.1394	0	1	1	1	550.337	550.336	1099.67	1099.67	-0.19	-0.00011	0/0	0	0	2.38672e+06	HCD	MS2	44.1685	22.364	68.239	29558	29558	29552	220621_E_201.raw	F6.1	NA	638	2.51	1	FALSE	0.002162	0.01861	0.182
High	Sequest HT	Sequest HT (A5)	A	5	Selected	EEAFVNDIDESSPGTEWER	[A].eEAFVNDIDESSPGTEWER.[V]	1	P09496	P09496	Clathrin light chain A OS=Homo sapiens OX=9606 GN=CLTA PE=1 SV=1	P09496	Clathrin light chain A OS=Homo sapiens OX=9606 GN=CLTA PE=1 SV=1	0	2	2	0.3493	0	1	1	1	1206.04	1206.04	2411.07	2411.08	-3.93	-0.00473	0/0	0	0	1.32908e+06	HCD	MS2	0	120	119.896	40670	40670	40659	200821_HELA_MGTG_iNrich_bRP_F04.raw	F1.4	NA	1027	2.92	1	FALSE	3.982e-05	0.000115	0.719
High	Sequest HT	Sequest HT (A5)	A	5	Selected	EEAFVNDIDESSPGTEWER	[A].eEAFVNDIDESSPGTEWER.[V]	1	P09496	P09496	Clathrin light chain A OS=Homo sapiens OX=9606 GN=CLTA PE=1 SV=1	P09496	Clathrin light chain A OS=Homo sapiens OX=9606 GN=CLTA PE=1 SV=1	0	2	2	0.0779	0	1	1	1	1206.04	1206.04	2411.08	2411.08	-2.98	-0.00359	0/0	0	0	444245	HCD	MS2	24.3542	120	119.128	37367	37367	37362	200821_HELA_MGTG_iNrich_bRP_F05.raw	F1.5	NA	1048	1.54	1	FALSE	0.007046	0.06756	0.04
High	Sequest HT	Sequest HT (A5)	A	5	Unambiguous	DDDTAVLVIDNGSGMCKAGFAGDDAPR	[M].dDDTAVLVIDNGSGmckAGFAGDDAPR.[A]	4	A5A3E0; P0CG38	A5A3E0	POTE ankyrin domain family member F OS=Homo sapiens OX=9606 GN=POTEF PE=1 SV=2;POTE ankyrin domain family member I OS=Homo sapiens OX=9606 GN=POTEI PE=3 SV=1	A5A3E0; P0CG39; Q6S8J3; P0CG38	POTE ankyrin domain family member F OS=Homo sapiens OX=9606 GN=POTEF PE=1 SV=2; POTE ankyrin domain family member J OS=Homo sapiens OX=9606 GN=POTEJ PE=3 SV=1; POTE ankyrin domain family member E OS=Homo sapiens OX=9606 GN=POTEE PE=2 SV=3; POTE ankyrin domain family member I OS=Homo sapiens OX=9606 GN=POTEI PE=3 SV=1	0	3	3	0.3633	0	1	1	1	1010.46	1010.46	3029.36	3029.38	-8.06	-0.00814	0/0	0	0	1.63536e+06	HCD	MS2	34.3645	120	127.545	43268	43268	43259	200821_HELA_MGTG_iNrich_bRP_F02.raw	F1.2	NA	1041	2.56	2	FALSE	0.002604	0.02326	0.156
High	Sequest HT	Sequest HT (A5)	A	5	Unambiguous	DDTAVLVIDNGSGMCKAGFAGDDAPR	[D].dDTAVLVIDNGSGmckAGFAGDDAPR.[A]	4	A5A3E0; P0CG38	A5A3E0	POTE ankyrin domain family member F OS=Homo sapiens OX=9606 GN=POTEF PE=1 SV=2;POTE ankyrin domain family member I OS=Homo sapiens OX=9606 GN=POTEI PE=3 SV=1	A5A3E0; P0CG39; Q6S8J3; P0CG38	POTE ankyrin domain family member F OS=Homo sapiens OX=9606 GN=POTEF PE=1 SV=2; POTE ankyrin domain family member J OS=Homo sapiens OX=9606 GN=POTEJ PE=3 SV=1; POTE ankyrin domain family member E OS=Homo sapiens OX=9606 GN=POTEE PE=2 SV=3; POTE ankyrin domain family member I OS=Homo sapiens OX=9606 GN=POTEI PE=3 SV=1	0	3	3	0.609	0	1	1	1	972.121	972.121	2914.35	2914.36	-3.53	-0.00343	0/0	0	0	770802	HCD	MS2	0	120	121.955	41692	41692	41680	200821_HELA_MGTG_iNrich_bRP_F08.raw	F1.8	NA	1683	3.35	2	FALSE	9.269e-06	2.921e-05	0.874
High	Sequest HT	Sequest HT (A5)	A	5	Selected	NLLKALQLNELTMDDDTAVLVIDNGSGMCKAGFAGDDAPR	[D].nLLkALQLNELTmDDDTAVLVIDNGSGMckAGFAGDDAPR.[A]	4	A5A3E0; P0CG38	A5A3E0	POTE ankyrin domain family member F OS=Homo sapiens OX=9606 GN=POTEF PE=1 SV=2;POTE ankyrin domain family member I OS=Homo sapiens OX=9606 GN=POTEI PE=3 SV=1	A5A3E0; P0CG39; Q6S8J3; P0CG38	POTE ankyrin domain family member F OS=Homo sapiens OX=9606 GN=POTEF PE=1 SV=2; POTE ankyrin domain family member J OS=Homo sapiens OX=9606 GN=POTEJ PE=3 SV=1; POTE ankyrin domain family member E OS=Homo sapiens OX=9606 GN=POTEE PE=2 SV=3; POTE ankyrin domain family member I OS=Homo sapiens OX=9606 GN=POTEI PE=3 SV=1	0	3	3	0.3069	0	1	1	1	1519.73	1519.73	4557.19	4557.23	-8.17	-0.0124	0/0	0	0	2885425	HCD	MS2	62.1369	120	121.21	40606	40606	40600	200821_HELA_MGTG_iNrich_bRP_F09.raw	F1.9	NA	2874	3.03	2	FALSE	0.0001068	0.0007626	0.51
High	Sequest HT	Sequest HT (A5)	A	5	Unambiguous	DDTAVLVIDNGSGMCKAGFAGDDAPR	[D].dDTAVLVIDNGSGmckAGFAGDDAPR.[A]	4	A5A3E0; P0CG38	A5A3E0	POTE ankyrin domain family member F OS=Homo sapiens OX=9606 GN=POTEF PE=1 SV=2;POTE ankyrin domain family member I OS=Homo sapiens OX=9606 GN=POTEI PE=3 SV=1	A5A3E0; P0CG39; Q6S8J3; P0CG38	POTE ankyrin domain family member F OS=Homo sapiens OX=9606 GN=POTEF PE=1 SV=2; POTE ankyrin domain family member J OS=Homo sapiens OX=9606 GN=POTEJ PE=3 SV=1; POTE ankyrin domain family member E OS=Homo sapiens OX=9606 GN=POTEE PE=2 SV=3; POTE ankyrin domain family member I OS=Homo sapiens OX=9606 GN=POTEI PE=3 SV=1	0	3	3	0.6712	0	1	1	1	972.12	972.12	2914.35	2914.36	-4.1	-0.00398	0/0	0	0	1.2631e+06	HCD	MS2	30.429	108.809	121.911	40543	40543	40542	200821_HELA_MGTG_iNrich_bRP_F10.raw	F1.10	NoneMonoisotopic	1651	4.38	2	FALSE	9.269e-06	6.472e-08	1.541
High	Sequest HT	Sequest HT (A5)	A	5	Unambiguous	DDTAVLVIDNGSGMCKAGFAGDDAPR	[D].dDTAVLVIDNGSGMckAGFAGDDAPR.[A]	4	A5A3E0; P0CG38	A5A3E0	POTE ankyrin domain family member F OS=Homo sapiens OX=9606 GN=POTEF PE=1 SV=2;POTE ankyrin domain family member I OS=Homo sapiens OX=9606 GN=POTEI PE=3 SV=1	A5A3E0; P0CG39; Q6S8J3; P0CG38	POTE ankyrin domain family member F OS=Homo sapiens OX=9606 GN=POTEF PE=1 SV=2; POTE ankyrin domain family member J OS=Homo sapiens OX=9606 GN=POTEJ PE=3 SV=1; POTE ankyrin domain family member E OS=Homo sapiens OX=9606 GN=POTEE PE=2 SV=3; POTE ankyrin domain family member I OS=Homo sapiens OX=9606 GN=POTEI PE=3 SV=1	0	3	3	0.2752	0	1	1	1	966.795	966.795	2898.37	2898.36	2.18	0.00211	0/0	0	0	1.28618e+06	HCD	MS2	14.8405	120	130.112	43668	43668	43663	200821_HELA_MGTG_iNrich_bRP_F10.raw	F1.10	NA	2269	2.18	2	FALSE	0.002796	0.02487	0.149
High	Sequest HT	Sequest HT (A5)	A	5	Unambiguous	DDTAVLVIDNGSGMCKAGFAGDDAPR	[D].dDTAVLVIDNGSGmckAGFAGDDAPR.[A]	4	A5A3E0; P0CG38	A5A3E0	POTE ankyrin domain family member F OS=Homo sapiens OX=9606 GN=POTEF PE=1 SV=2;POTE ankyrin domain family member I OS=Homo sapiens OX=9606 GN=POTEI PE=3 SV=1	A5A3E0; P0CG39; Q6S8J3; P0CG38	POTE ankyrin domain family member F OS=Homo sapiens OX=9606 GN=POTEF PE=1 SV=2; POTE ankyrin domain family member J OS=Homo sapiens OX=9606 GN=POTEJ PE=3 SV=1; POTE ankyrin domain family member E OS=Homo sapiens OX=9606 GN=POTEE PE=2 SV=3; POTE ankyrin domain family member I OS=Homo sapiens OX=9606 GN=POTEI PE=3 SV=1	0	3	3	0.4662	0	1	1	1	972.127	972.127	2914.37	2914.36	3.05	0.00296	0/0	0	0	46403.2	HCD	MS2	19.4302	120	133.854	45826	45826	45817	200821_HELA_MGTG_iNrich_bRP_F11.raw	F1.11	NA	2015	1.48	2	FALSE	0.00621	0.0598	0.053
High	Sequest HT	Sequest HT (A5)	A	5	Unambiguous	DDTAVLVIDNGSGMCKAGFAGDDAPR	[D].dDTAVLVIDNGSGMckAGFAGDDAPR.[A]	4	A5A3E0; P0CG38	A5A3E0	POTE ankyrin domain family member F OS=Homo sapiens OX=9606 GN=POTEF PE=1 SV=2;POTE ankyrin domain family member I OS=Homo sapiens OX=9606 GN=POTEI PE=3 SV=1	A5A3E0; P0CG39; Q6S8J3; P0CG38	POTE ankyrin domain family member F OS=Homo sapiens OX=9606 GN=POTEF PE=1 SV=2; POTE ankyrin domain family member J OS=Homo sapiens OX=9606 GN=POTEJ PE=3 SV=1; POTE ankyrin domain family member E OS=Homo sapiens OX=9606 GN=POTEE PE=2 SV=3; POTE ankyrin domain family member I OS=Homo sapiens OX=9606 GN=POTEI PE=3 SV=1	0	3	3	0.2913	0	1	1	1	966.8	966.8	2898.39	2898.36	7.79	0.00752	0/0	0	0	3.22071e+06	HCD	MS2	45.7379	51.817	123.23	42463	42463	42457	200925_HELA_iNrich_bRP_F09.raw	F2.9	NA	2623	2.54	2	FALSE	0.002831	0.02521	0.147
High	Sequest HT	Sequest HT (A5)	A	5	Unambiguous	DDTAVLVIDNGSGMCKAGFAGDDAPR	[D].dDTAVLVIDNGSGMckAGFAGDDAPR.[A]	4	A5A3E0; P0CG38	A5A3E0	POTE ankyrin domain family member F OS=Homo sapiens OX=9606 GN=POTEF PE=1 SV=2;POTE ankyrin domain family member I OS=Homo sapiens OX=9606 GN=POTEI PE=3 SV=1	A5A3E0; P0CG39; Q6S8J3; P0CG38	POTE ankyrin domain family member F OS=Homo sapiens OX=9606 GN=POTEF PE=1 SV=2; POTE ankyrin domain family member J OS=Homo sapiens OX=9606 GN=POTEJ PE=3 SV=1; POTE ankyrin domain family member E OS=Homo sapiens OX=9606 GN=POTEE PE=2 SV=3; POTE ankyrin domain family member I OS=Homo sapiens OX=9606 GN=POTEI PE=3 SV=1	0	3	3	0.3404	0	1	1	1	966.798	966.798	2898.38	2898.36	6.17	0.00596	0/0	0	0	2.19566e+06	HCD	MS2	50.3348	115.923	128.709	44795	44795	44793	200925_HELA_iNrich_bRP_F09.raw	F2.9	NA	2476	2.35	2	FALSE	0.005095	0.04785	0.076
High	Sequest HT	Sequest HT (A5)	A	5	Selected	DNLLKALQLNELTMDDDTAVLVIDNGSGMCKAGFAGDDAPR	[N].dNLLkALQLNELTMDDDTAVLVIDNGSGMckAGFAGDDAPR.[A]	4	A5A3E0; P0CG38	A5A3E0	POTE ankyrin domain family member F OS=Homo sapiens OX=9606 GN=POTEF PE=1 SV=2;POTE ankyrin domain family member I OS=Homo sapiens OX=9606 GN=POTEI PE=3 SV=1	A5A3E0; P0CG39; Q6S8J3; P0CG38	POTE ankyrin domain family member F OS=Homo sapiens OX=9606 GN=POTEF PE=1 SV=2; POTE ankyrin domain family member J OS=Homo sapiens OX=9606 GN=POTEJ PE=3 SV=1; POTE ankyrin domain family member E OS=Homo sapiens OX=9606 GN=POTEE PE=2 SV=3; POTE ankyrin domain family member I OS=Homo sapiens OX=9606 GN=POTEI PE=3 SV=1	0	3	3	0.6336	0	1	1	1	1552.42	1552.42	4655.25	4655.27	-5.77	-0.00895	0/0	0	0	1.22551e+06	HCD	MS2	0	120	124.595	43357	43357	43345	200925_HELA_iNrich_bRP_F10.raw	F2.10	NA	3097	2.92	2	FALSE	0.001189	0.01049	0.244
High	Sequest HT	Sequest HT (A5)	A	5	Unambiguous	DDTAVLVIDNGSGMCKAGFAGDDAPR	[D].dDTAVLVIDNGSGMckAGFAGDDAPR.[A]	4	A5A3E0; P0CG38	A5A3E0	POTE ankyrin domain family member F OS=Homo sapiens OX=9606 GN=POTEF PE=1 SV=2;POTE ankyrin domain family member I OS=Homo sapiens OX=9606 GN=POTEI PE=3 SV=1	A5A3E0; P0CG39; Q6S8J3; P0CG38	POTE ankyrin domain family member F OS=Homo sapiens OX=9606 GN=POTEF PE=1 SV=2; POTE ankyrin domain family member J OS=Homo sapiens OX=9606 GN=POTEJ PE=3 SV=1; POTE ankyrin domain family member E OS=Homo sapiens OX=9606 GN=POTEE PE=2 SV=3; POTE ankyrin domain family member I OS=Homo sapiens OX=9606 GN=POTEI PE=3 SV=1	0	3	3	0.6133	0	1	1	1	966.793	966.793	2898.36	2898.36	0.44	0.00043	0/0	0	0	2.28143e+06	HCD	MS2	43.5852	109.998	128.275	44878	44878	44877	200925_HELA_iNrich_bRP_F10.raw	F2.10	NA	2124	4.81	2	FALSE	9.269e-06	1.808e-06	1.179
High	Sequest HT	Sequest HT (A5)	A	5	Unambiguous	DDTAVLVIDNGSGMCKAGFAGDDAPR	[D].dDTAVLVIDNGSGmckAGFAGDDAPR.[A]	4	A5A3E0; P0CG38	A5A3E0	POTE ankyrin domain family member F OS=Homo sapiens OX=9606 GN=POTEF PE=1 SV=2;POTE ankyrin domain family member I OS=Homo sapiens OX=9606 GN=POTEI PE=3 SV=1	A5A3E0; P0CG39; Q6S8J3; P0CG38	POTE ankyrin domain family member F OS=Homo sapiens OX=9606 GN=POTEF PE=1 SV=2; POTE ankyrin domain family member J OS=Homo sapiens OX=9606 GN=POTEJ PE=3 SV=1; POTE ankyrin domain family member E OS=Homo sapiens OX=9606 GN=POTEE PE=2 SV=3; POTE ankyrin domain family member I OS=Homo sapiens OX=9606 GN=POTEI PE=3 SV=1	0	3	0	0.5691	0	1	1	1	972.121	972.121	2914.35	2914.36	-2.66	-0.00258	0/0	0	0	4.72302e+06	HCD	MS2	78.6123	98.192	114.437	52208	52208	52198	220621_E_101.raw	F5.1	NoneMonoisotopic	1703	4.99	2	FALSE	3.982e-05	0.0001633	0.679
High	Sequest HT	Sequest HT (A5)	A	5	Selected	DDTAVLVIDNGSGMCKAGFAGDDAPR	[D].dDTAVLVIDNGSGmckAGFAGDDAPR.[A]	4	A5A3E0; P0CG38	A5A3E0	POTE ankyrin domain family member F OS=Homo sapiens OX=9606 GN=POTEF PE=1 SV=2;POTE ankyrin domain family member I OS=Homo sapiens OX=9606 GN=POTEI PE=3 SV=1	A5A3E0; P0CG39; Q6S8J3; P0CG38	POTE ankyrin domain family member F OS=Homo sapiens OX=9606 GN=POTEF PE=1 SV=2; POTE ankyrin domain family member J OS=Homo sapiens OX=9606 GN=POTEJ PE=3 SV=1; POTE ankyrin domain family member E OS=Homo sapiens OX=9606 GN=POTEE PE=2 SV=3; POTE ankyrin domain family member I OS=Homo sapiens OX=9606 GN=POTEI PE=3 SV=1	0	3	3	0.4973	0	1	1	1	972.123	972.122	2914.35	2914.36	-1	-0.00097	0/0	0	0	1.79101e+06	HCD	MS2	29.6981	120	115.46	52631	52631	52627	220621_E_101.raw	F5.1	NA	1799	3.66	2	FALSE	3.982e-05	9.916e-05	0.736
High	Sequest HT	Sequest HT (A5)	A	5	Unambiguous	DDTAVLVIDNGSGMCKAGFAGDDAPR	[D].dDTAVLVIDNGSGmckAGFAGDDAPR.[A]	4	A5A3E0; P0CG38	A5A3E0	POTE ankyrin domain family member F OS=Homo sapiens OX=9606 GN=POTEF PE=1 SV=2;POTE ankyrin domain family member I OS=Homo sapiens OX=9606 GN=POTEI PE=3 SV=1	A5A3E0; P0CG39; Q6S8J3; P0CG38	POTE ankyrin domain family member F OS=Homo sapiens OX=9606 GN=POTEF PE=1 SV=2; POTE ankyrin domain family member J OS=Homo sapiens OX=9606 GN=POTEJ PE=3 SV=1; POTE ankyrin domain family member E OS=Homo sapiens OX=9606 GN=POTEE PE=2 SV=3; POTE ankyrin domain family member I OS=Homo sapiens OX=9606 GN=POTEI PE=3 SV=1	0	3	3	0.5045	0	1	1	1	972.121	972.12	2914.35	2914.36	-3.31	-0.00322	0/0	0	0	2.19451e+06	HCD	MS2	40.506	111.88	117.877	53649	53649	53641	220621_E_101.raw	F5.1	NoneMonoisotopic	1688	3.35	2	FALSE	0.003406	0.03012	0.127
High	Sequest HT	Sequest HT (A5)	A	5	Selected	DDTAVLVIDNGSGMCKAGFAGDDAPR	[D].dDTAVLVIDNGSGMckAGFAGDDAPR.[A]	4	A5A3E0; P0CG38	A5A3E0	POTE ankyrin domain family member F OS=Homo sapiens OX=9606 GN=POTEF PE=1 SV=2;POTE ankyrin domain family member I OS=Homo sapiens OX=9606 GN=POTEI PE=3 SV=1	A5A3E0; P0CG39; Q6S8J3; P0CG38	POTE ankyrin domain family member F OS=Homo sapiens OX=9606 GN=POTEF PE=1 SV=2; POTE ankyrin domain family member J OS=Homo sapiens OX=9606 GN=POTEJ PE=3 SV=1; POTE ankyrin domain family member E OS=Homo sapiens OX=9606 GN=POTEE PE=2 SV=3; POTE ankyrin domain family member I OS=Homo sapiens OX=9606 GN=POTEI PE=3 SV=1	0	3	3	0.5059	0	1	1	1	966.788	966.788	2898.35	2898.36	-4.69	-0.00453	0/0	0	0	1.99341e+06	HCD	MS2	44.2102	120	120.305	54666	54666	54655	220621_E_101.raw	F5.1	NA	1884	4.21	2	FALSE	0.0002264	0.00165	0.43
High	Sequest HT	Sequest HT (A5)	A	5	Unambiguous	DDTAVLVIDNGSGMCKAGFAGDDAPR	[D].dDTAVLVIDNGSGMckAGFAGDDAPR.[A]	4	A5A3E0; P0CG38	A5A3E0	POTE ankyrin domain family member F OS=Homo sapiens OX=9606 GN=POTEF PE=1 SV=2;POTE ankyrin domain family member I OS=Homo sapiens OX=9606 GN=POTEI PE=3 SV=1	A5A3E0; P0CG39; Q6S8J3; P0CG38	POTE ankyrin domain family member F OS=Homo sapiens OX=9606 GN=POTEF PE=1 SV=2; POTE ankyrin domain family member J OS=Homo sapiens OX=9606 GN=POTEJ PE=3 SV=1; POTE ankyrin domain family member E OS=Homo sapiens OX=9606 GN=POTEE PE=2 SV=3; POTE ankyrin domain family member I OS=Homo sapiens OX=9606 GN=POTEI PE=3 SV=1	0	3	3	0.5415	0	1	1	1	966.785	966.784	2898.34	2898.36	-8.16	-0.00789	0/0	0	0	3.10585e+06	HCD	MS2	45.9043	117.69	120.46	54729	54729	54720	220621_E_101.raw	F5.1	NA	1698	4.58	2	FALSE	0.0001938	0.001432	0.444
High	Sequest HT	Sequest HT (A5)	A	5	Unambiguous	DDTAVLVIDNGSGMCKAGFAGDDAPR	[D].dDTAVLVIDNGSGmckAGFAGDDAPR.[A]	4	A5A3E0; P0CG38	A5A3E0	POTE ankyrin domain family member F OS=Homo sapiens OX=9606 GN=POTEF PE=1 SV=2;POTE ankyrin domain family member I OS=Homo sapiens OX=9606 GN=POTEI PE=3 SV=1	A5A3E0; P0CG39; Q6S8J3; P0CG38	POTE ankyrin domain family member F OS=Homo sapiens OX=9606 GN=POTEF PE=1 SV=2; POTE ankyrin domain family member J OS=Homo sapiens OX=9606 GN=POTEJ PE=3 SV=1; POTE ankyrin domain family member E OS=Homo sapiens OX=9606 GN=POTEE PE=2 SV=3; POTE ankyrin domain family member I OS=Homo sapiens OX=9606 GN=POTEI PE=3 SV=1	0	3	0	0.6103	0	1	1	1	972.119	972.119	2914.34	2914.36	-5.43	-0.00528	0/0	0	0	1.37186e+06	HCD	MS2	79.4237	120	122.832	55717	55717	55708	220621_E_101.raw	F5.1	NoneMonoisotopic	1553	4.08	2	FALSE	9.269e-06	1.323e-05	0.961
High	Sequest HT	Sequest HT (A5)	A	5	Unambiguous	DDTAVLVIDNGSGMCKAGFAGDDAPR	[D].dDTAVLVIDNGSGmckAGFAGDDAPR.[A]	4	A5A3E0; P0CG38	A5A3E0	POTE ankyrin domain family member F OS=Homo sapiens OX=9606 GN=POTEF PE=1 SV=2;POTE ankyrin domain family member I OS=Homo sapiens OX=9606 GN=POTEI PE=3 SV=1	A5A3E0; P0CG39; Q6S8J3; P0CG38	POTE ankyrin domain family member F OS=Homo sapiens OX=9606 GN=POTEF PE=1 SV=2; POTE ankyrin domain family member J OS=Homo sapiens OX=9606 GN=POTEJ PE=3 SV=1; POTE ankyrin domain family member E OS=Homo sapiens OX=9606 GN=POTEE PE=2 SV=3; POTE ankyrin domain family member I OS=Homo sapiens OX=9606 GN=POTEI PE=3 SV=1	0	3	3	0.5866	0	1	1	1	972.121	972.121	2914.35	2914.36	-3.18	-0.00308	0/0	0	0	2.61825e+06	HCD	MS2	48.3325	120	122.953	55766	55766	55760	220621_E_101.raw	F5.1	NoneMonoisotopic	1695	4.33	2	FALSE	1.762e-05	5.585e-05	0.802
High	Sequest HT	Sequest HT (A5)	A	5	Unambiguous	DDTAVLVIDNGSGMCKAGFAGDDAPR	[D].dDTAVLVIDNGSGmckAGFAGDDAPR.[A]	4	A5A3E0; P0CG38	A5A3E0	POTE ankyrin domain family member F OS=Homo sapiens OX=9606 GN=POTEF PE=1 SV=2;POTE ankyrin domain family member I OS=Homo sapiens OX=9606 GN=POTEI PE=3 SV=1	A5A3E0; P0CG39; Q6S8J3; P0CG38	POTE ankyrin domain family member F OS=Homo sapiens OX=9606 GN=POTEF PE=1 SV=2; POTE ankyrin domain family member J OS=Homo sapiens OX=9606 GN=POTEJ PE=3 SV=1; POTE ankyrin domain family member E OS=Homo sapiens OX=9606 GN=POTEE PE=2 SV=3; POTE ankyrin domain family member I OS=Homo sapiens OX=9606 GN=POTEI PE=3 SV=1	0	3	3	0.4974	0	1	1	1	972.121	972.121	2914.35	2914.36	-3.18	-0.00308	0/0	0	0	2.61825e+06	HCD	MS2	60.881	120	122.966	55772	55772	55760	220621_E_101.raw	F5.1	NoneMonoisotopic	1695	3.82	2	FALSE	0.004184	0.03743	0.103
High	Sequest HT	Sequest HT (A5)	A	5	Selected	DDTAVLVIDNGSGMCKAGFAGDDAPR	[D].dDTAVLVIDNGSGmckAGFAGDDAPR.[A]	4	A5A3E0; P0CG38	A5A3E0	POTE ankyrin domain family member F OS=Homo sapiens OX=9606 GN=POTEF PE=1 SV=2;POTE ankyrin domain family member I OS=Homo sapiens OX=9606 GN=POTEI PE=3 SV=1	A5A3E0; P0CG39; Q6S8J3; P0CG38	POTE ankyrin domain family member F OS=Homo sapiens OX=9606 GN=POTEF PE=1 SV=2; POTE ankyrin domain family member J OS=Homo sapiens OX=9606 GN=POTEJ PE=3 SV=1; POTE ankyrin domain family member E OS=Homo sapiens OX=9606 GN=POTEE PE=2 SV=3; POTE ankyrin domain family member I OS=Homo sapiens OX=9606 GN=POTEI PE=3 SV=1	0	3	3	0.55	0	1	1	1	972.118	972.118	2914.34	2914.36	-6.04	-0.00587	0/0	0	0	1.09901e+06	HCD	MS2	22.8894	120	123.836	56125	56125	56124	220621_E_101.raw	F5.1	NA	1542	3.6	2	FALSE	9.666e-05	0.0006953	0.519
High	Sequest HT	Sequest HT (A5)	A	5	Unambiguous	DDTAVLVIDNGSGMCKAGFAGDDAPR	[D].dDTAVLVIDNGSGmckAGFAGDDAPR.[A]	4	A5A3E0; P0CG38	A5A3E0	POTE ankyrin domain family member F OS=Homo sapiens OX=9606 GN=POTEF PE=1 SV=2;POTE ankyrin domain family member I OS=Homo sapiens OX=9606 GN=POTEI PE=3 SV=1	A5A3E0; P0CG39; Q6S8J3; P0CG38	POTE ankyrin domain family member F OS=Homo sapiens OX=9606 GN=POTEF PE=1 SV=2; POTE ankyrin domain family member J OS=Homo sapiens OX=9606 GN=POTEJ PE=3 SV=1; POTE ankyrin domain family member E OS=Homo sapiens OX=9606 GN=POTEE PE=2 SV=3; POTE ankyrin domain family member I OS=Homo sapiens OX=9606 GN=POTEI PE=3 SV=1	0	3	3	0.6569	0	1	1	1	972.116	972.116	2914.33	2914.36	-7.93	-0.0077	0/0	0	0	3.85202e+06	HCD	MS2	14.0907	64.848	112.87	52478	52478	52471	220621_E_102.raw	F5.2	NA	1481	4.43	2	FALSE	5.843e-05	0.000311	0.607
High	Sequest HT	Sequest HT (A5)	A	5	Unambiguous	DDTAVLVIDNGSGMCKAGFAGDDAPR	[D].dDTAVLVIDNGSGmckAGFAGDDAPR.[A]	4	A5A3E0; P0CG38	A5A3E0	POTE ankyrin domain family member F OS=Homo sapiens OX=9606 GN=POTEF PE=1 SV=2;POTE ankyrin domain family member I OS=Homo sapiens OX=9606 GN=POTEI PE=3 SV=1	A5A3E0; P0CG39; Q6S8J3; P0CG38	POTE ankyrin domain family member F OS=Homo sapiens OX=9606 GN=POTEF PE=1 SV=2; POTE ankyrin domain family member J OS=Homo sapiens OX=9606 GN=POTEJ PE=3 SV=1; POTE ankyrin domain family member E OS=Homo sapiens OX=9606 GN=POTEE PE=2 SV=3; POTE ankyrin domain family member I OS=Homo sapiens OX=9606 GN=POTEI PE=3 SV=1	0	3	0	0.5091	0	1	1	1	972.118	972.118	2914.34	2914.36	-6	-0.00583	0/0	0	0	3.62394e+06	HCD	MS2	80.9404	99.582	116.203	54001	54001	53992	220621_E_102.raw	F5.2	NA	1540	3.85	2	FALSE	0.000182	0.0013	0.454
High	Sequest HT	Sequest HT (A5)	A	5	Unambiguous	DDTAVLVIDNGSGMCKAGFAGDDAPR	[D].dDTAVLVIDNGSGmckAGFAGDDAPR.[A]	4	A5A3E0; P0CG38	A5A3E0	POTE ankyrin domain family member F OS=Homo sapiens OX=9606 GN=POTEF PE=1 SV=2;POTE ankyrin domain family member I OS=Homo sapiens OX=9606 GN=POTEI PE=3 SV=1	A5A3E0; P0CG39; Q6S8J3; P0CG38	POTE ankyrin domain family member F OS=Homo sapiens OX=9606 GN=POTEF PE=1 SV=2; POTE ankyrin domain family member J OS=Homo sapiens OX=9606 GN=POTEJ PE=3 SV=1; POTE ankyrin domain family member E OS=Homo sapiens OX=9606 GN=POTEE PE=2 SV=3; POTE ankyrin domain family member I OS=Homo sapiens OX=9606 GN=POTEI PE=3 SV=1	0	3	3	0.5549	0	1	1	1	972.122	972.122	2914.35	2914.36	-1.66	-0.00161	0/0	0	0	3131737	HCD	MS2	61.3083	112.759	117.916	54784	54784	54772	220621_E_102.raw	F5.2	NA	1747	4.92	2	FALSE	3.982e-05	0.0002268	0.642
High	Sequest HT	Sequest HT (A5)	A	5	Selected	DDTAVLVIDNGSGMCKAGFAGDDAPR	[D].dDTAVLVIDNGSGMckAGFAGDDAPR.[A]	4	A5A3E0; P0CG38	A5A3E0	POTE ankyrin domain family member F OS=Homo sapiens OX=9606 GN=POTEF PE=1 SV=2;POTE ankyrin domain family member I OS=Homo sapiens OX=9606 GN=POTEI PE=3 SV=1	A5A3E0; P0CG39; Q6S8J3; P0CG38	POTE ankyrin domain family member F OS=Homo sapiens OX=9606 GN=POTEF PE=1 SV=2; POTE ankyrin domain family member J OS=Homo sapiens OX=9606 GN=POTEJ PE=3 SV=1; POTE ankyrin domain family member E OS=Homo sapiens OX=9606 GN=POTEE PE=2 SV=3; POTE ankyrin domain family member I OS=Homo sapiens OX=9606 GN=POTEI PE=3 SV=1	0	2	2	0.6632	0	1	1	1	1449.68	1449.68	2898.35	2898.36	-6.02	-0.00872	0/0	0	0	1.66994e+06	HCD	MS2	31.6285	120	120.679	55983	55983	55981	220621_E_102.raw	F5.2	NA	1818	4.84	2	FALSE	9.269e-06	7.894e-07	1.269
High	Sequest HT	Sequest HT (A5)	A	5	Unambiguous	DDTAVLVIDNGSGMCKAGFAGDDAPR	[D].dDTAVLVIDNGSGmckAGFAGDDAPR.[A]	4	A5A3E0; P0CG38	A5A3E0	POTE ankyrin domain family member F OS=Homo sapiens OX=9606 GN=POTEF PE=1 SV=2;POTE ankyrin domain family member I OS=Homo sapiens OX=9606 GN=POTEI PE=3 SV=1	A5A3E0; P0CG39; Q6S8J3; P0CG38	POTE ankyrin domain family member F OS=Homo sapiens OX=9606 GN=POTEF PE=1 SV=2; POTE ankyrin domain family member J OS=Homo sapiens OX=9606 GN=POTEJ PE=3 SV=1; POTE ankyrin domain family member E OS=Homo sapiens OX=9606 GN=POTEE PE=2 SV=3; POTE ankyrin domain family member I OS=Homo sapiens OX=9606 GN=POTEI PE=3 SV=1	0	3	3	0.3363	0	1	1	1	972.129	972.129	2914.37	2914.36	4.92	0.00478	0/0	0	0	5.42881e+06	HCD	MS2	47.0274	73.977	120.722	56001	56001	55994	220621_E_102.raw	F5.2	NA	2116	3.33	2	FALSE	0.005453	0.05145	0.069
High	Sequest HT	Sequest HT (A5)	A	5	Selected	DDTAVLVIDNGSGMCKAGFAGDDAPR	[D].dDTAVLVIDNGSGMckAGFAGDDAPR.[A]	4	A5A3E0; P0CG38	A5A3E0	POTE ankyrin domain family member F OS=Homo sapiens OX=9606 GN=POTEF PE=1 SV=2;POTE ankyrin domain family member I OS=Homo sapiens OX=9606 GN=POTEI PE=3 SV=1	A5A3E0; P0CG39; Q6S8J3; P0CG38	POTE ankyrin domain family member F OS=Homo sapiens OX=9606 GN=POTEF PE=1 SV=2; POTE ankyrin domain family member J OS=Homo sapiens OX=9606 GN=POTEJ PE=3 SV=1; POTE ankyrin domain family member E OS=Homo sapiens OX=9606 GN=POTEE PE=2 SV=3; POTE ankyrin domain family member I OS=Homo sapiens OX=9606 GN=POTEI PE=3 SV=1	0	2	0	0.6845	0	1	1	1	1449.68	1449.68	2898.34	2898.36	-6.53	-0.00946	0/0	0	0	32179126	HCD	MS2	68.8541	15.142	120.853	56068	56068	56059	220621_E_102.raw	F5.2	NA	1787	5.04	2	FALSE	9.269e-06	8.025e-08	1.518
High	Sequest HT	Sequest HT (A5)	A	5	Selected	DDTAVLVIDNGSGMCKAGFAGDDAPR	[D].dDTAVLVIDNGSGMckAGFAGDDAPR.[A]	4	A5A3E0; P0CG38	A5A3E0	POTE ankyrin domain family member F OS=Homo sapiens OX=9606 GN=POTEF PE=1 SV=2;POTE ankyrin domain family member I OS=Homo sapiens OX=9606 GN=POTEI PE=3 SV=1	A5A3E0; P0CG39; Q6S8J3; P0CG38	POTE ankyrin domain family member F OS=Homo sapiens OX=9606 GN=POTEF PE=1 SV=2; POTE ankyrin domain family member J OS=Homo sapiens OX=9606 GN=POTEJ PE=3 SV=1; POTE ankyrin domain family member E OS=Homo sapiens OX=9606 GN=POTEE PE=2 SV=3; POTE ankyrin domain family member I OS=Homo sapiens OX=9606 GN=POTEI PE=3 SV=1	0	2	0	0.7111	0	1	1	1	1449.68	1449.68	2898.35	2898.36	-4.76	-0.0069	0/0	0	0	47785416	HCD	MS2	65.5045	11.125	120.909	56097	56097	56085	220621_E_102.raw	F5.2	NA	1878	4.88	2	FALSE	9.269e-06	1.546e-08	1.697
High	Sequest HT	Sequest HT (A5)	A	5	Selected	DDTAVLVIDNGSGMCKAGFAGDDAPR	[D].dDTAVLVIDNGSGmckAGFAGDDAPR.[A]	4	A5A3E0; P0CG38	A5A3E0	POTE ankyrin domain family member F OS=Homo sapiens OX=9606 GN=POTEF PE=1 SV=2;POTE ankyrin domain family member I OS=Homo sapiens OX=9606 GN=POTEI PE=3 SV=1	A5A3E0; P0CG39; Q6S8J3; P0CG38	POTE ankyrin domain family member F OS=Homo sapiens OX=9606 GN=POTEF PE=1 SV=2; POTE ankyrin domain family member J OS=Homo sapiens OX=9606 GN=POTEJ PE=3 SV=1; POTE ankyrin domain family member E OS=Homo sapiens OX=9606 GN=POTEE PE=2 SV=3; POTE ankyrin domain family member I OS=Homo sapiens OX=9606 GN=POTEI PE=3 SV=1	0	3	3	0.3619	0	1	1	1	972.126	972.126	2914.36	2914.36	2.07	0.00201	0/0	0	0	14543307	HCD	MS2	42.6445	24.173	121.246	56256	56256	56254	220621_E_102.raw	F5.2	NA	1957	3.15	2	FALSE	0.001253	0.011	0.239
High	Sequest HT	Sequest HT (A5)	A	5	Unambiguous	DDTAVLVIDNGSGMCKAGFAGDDAPR	[D].dDTAVLVIDNGSGmckAGFAGDDAPR.[A]	4	A5A3E0; P0CG38	A5A3E0	POTE ankyrin domain family member F OS=Homo sapiens OX=9606 GN=POTEF PE=1 SV=2;POTE ankyrin domain family member I OS=Homo sapiens OX=9606 GN=POTEI PE=3 SV=1	A5A3E0; P0CG39; Q6S8J3; P0CG38	POTE ankyrin domain family member F OS=Homo sapiens OX=9606 GN=POTEF PE=1 SV=2; POTE ankyrin domain family member J OS=Homo sapiens OX=9606 GN=POTEJ PE=3 SV=1; POTE ankyrin domain family member E OS=Homo sapiens OX=9606 GN=POTEE PE=2 SV=3; POTE ankyrin domain family member I OS=Homo sapiens OX=9606 GN=POTEI PE=3 SV=1	0	3	3	0.5279	0	1	1	1	972.128	972.128	2914.37	2914.36	4.01	0.0039	0/0	0	0	4754285	HCD	MS2	39.5189	61.724	121.607	56428	56428	56423	220621_E_102.raw	F5.2	NA	2081	3.58	2	FALSE	3.982e-05	0.0002013	0.655
High	Sequest HT	Sequest HT (A5)	A	5	Selected	DDTAVLVIDNGSGMCKAGFAGDDAPR	[D].dDTAVLVIDNGSGMckAGFAGDDAPR.[A]	4	A5A3E0; P0CG38	A5A3E0	POTE ankyrin domain family member F OS=Homo sapiens OX=9606 GN=POTEF PE=1 SV=2;POTE ankyrin domain family member I OS=Homo sapiens OX=9606 GN=POTEI PE=3 SV=1	A5A3E0; P0CG39; Q6S8J3; P0CG38	POTE ankyrin domain family member F OS=Homo sapiens OX=9606 GN=POTEF PE=1 SV=2; POTE ankyrin domain family member J OS=Homo sapiens OX=9606 GN=POTEJ PE=3 SV=1; POTE ankyrin domain family member E OS=Homo sapiens OX=9606 GN=POTEE PE=2 SV=3; POTE ankyrin domain family member I OS=Homo sapiens OX=9606 GN=POTEI PE=3 SV=1	0	2	2	0.6347	0	1	1	1	1449.68	1449.68	2898.34	2898.36	-6.3	-0.00913	0/0	0	0	2.94552e+06	HCD	MS2	0	117.59	121.747	56496	56496	56488	220621_E_102.raw	F5.2	NA	1800	4.79	2	FALSE	9.269e-06	3.213e-07	1.367
High	Sequest HT	Sequest HT (A5)	A	5	Selected	DDTAVLVIDNGSGMCKAGFAGDDAPR	[D].dDTAVLVIDNGSGmckAGFAGDDAPR.[A]	4	A5A3E0; P0CG38	A5A3E0	POTE ankyrin domain family member F OS=Homo sapiens OX=9606 GN=POTEF PE=1 SV=2;POTE ankyrin domain family member I OS=Homo sapiens OX=9606 GN=POTEI PE=3 SV=1	A5A3E0; P0CG39; Q6S8J3; P0CG38	POTE ankyrin domain family member F OS=Homo sapiens OX=9606 GN=POTEF PE=1 SV=2; POTE ankyrin domain family member J OS=Homo sapiens OX=9606 GN=POTEJ PE=3 SV=1; POTE ankyrin domain family member E OS=Homo sapiens OX=9606 GN=POTEE PE=2 SV=3; POTE ankyrin domain family member I OS=Homo sapiens OX=9606 GN=POTEI PE=3 SV=1	0	3	3	0.3963	0	1	1	1	972.127	972.128	2914.37	2914.36	3.5	0.0034	0/0	0	0	9663533	HCD	MS2	44.0934	33.122	122.335	56767	56767	56761	220621_E_102.raw	F5.2	NA	2038	3.28	2	FALSE	0.003685	0.03266	0.118
High	Sequest HT	Sequest HT (A5)	A	5	Unambiguous	DDTAVLVIDNGSGMCKAGFAGDDAPR	[D].dDTAVLVIDNGSGmckAGFAGDDAPR.[A]	4	A5A3E0; P0CG38	A5A3E0	POTE ankyrin domain family member F OS=Homo sapiens OX=9606 GN=POTEF PE=1 SV=2;POTE ankyrin domain family member I OS=Homo sapiens OX=9606 GN=POTEI PE=3 SV=1	A5A3E0; P0CG39; Q6S8J3; P0CG38	POTE ankyrin domain family member F OS=Homo sapiens OX=9606 GN=POTEF PE=1 SV=2; POTE ankyrin domain family member J OS=Homo sapiens OX=9606 GN=POTEJ PE=3 SV=1; POTE ankyrin domain family member E OS=Homo sapiens OX=9606 GN=POTEE PE=2 SV=3; POTE ankyrin domain family member I OS=Homo sapiens OX=9606 GN=POTEI PE=3 SV=1	0	3	3	0.5076	0	1	1	1	972.13	972.13	2914.37	2914.36	5.83	0.00566	0/0	0	0	6053795	HCD	MS2	28.6089	37.805	122.567	56873	56873	56865	220621_E_102.raw	F5.2	NA	2151	3.31	2	FALSE	0.0006389	0.0055	0.309
High	Sequest HT	Sequest HT (A5)	A	5	Unambiguous	DDTAVLVIDNGSGMCKAGFAGDDAPR	[D].dDTAVLVIDNGSGmckAGFAGDDAPR.[A]	4	A5A3E0; P0CG38	A5A3E0	POTE ankyrin domain family member F OS=Homo sapiens OX=9606 GN=POTEF PE=1 SV=2;POTE ankyrin domain family member I OS=Homo sapiens OX=9606 GN=POTEI PE=3 SV=1	A5A3E0; P0CG39; Q6S8J3; P0CG38	POTE ankyrin domain family member F OS=Homo sapiens OX=9606 GN=POTEF PE=1 SV=2; POTE ankyrin domain family member J OS=Homo sapiens OX=9606 GN=POTEJ PE=3 SV=1; POTE ankyrin domain family member E OS=Homo sapiens OX=9606 GN=POTEE PE=2 SV=3; POTE ankyrin domain family member I OS=Homo sapiens OX=9606 GN=POTEI PE=3 SV=1	0	3	3	0.5244	0	1	1	1	972.126	972.126	2914.36	2914.36	2.06	0.002	0/0	0	0	1.62306e+06	HCD	MS2	29.8353	55.427	122.87	57007	57007	56995	220621_E_102.raw	F5.2	NA	1956	3.49	2	FALSE	0.0006993	0.006079	0.299
High	Sequest HT	Sequest HT (A5)	A	5	Unambiguous	DDTAVLVIDNGSGMCKAGFAGDDAPR	[D].dDTAVLVIDNGSGMckAGFAGDDAPR.[A]	4	A5A3E0; P0CG38	A5A3E0	POTE ankyrin domain family member F OS=Homo sapiens OX=9606 GN=POTEF PE=1 SV=2;POTE ankyrin domain family member I OS=Homo sapiens OX=9606 GN=POTEI PE=3 SV=1	A5A3E0; P0CG39; Q6S8J3; P0CG38	POTE ankyrin domain family member F OS=Homo sapiens OX=9606 GN=POTEF PE=1 SV=2; POTE ankyrin domain family member J OS=Homo sapiens OX=9606 GN=POTEJ PE=3 SV=1; POTE ankyrin domain family member E OS=Homo sapiens OX=9606 GN=POTEE PE=2 SV=3; POTE ankyrin domain family member I OS=Homo sapiens OX=9606 GN=POTEI PE=3 SV=1	0	3	3	0.5943	0	1	1	1	966.787	966.787	2898.35	2898.36	-5.7	-0.0055	0/0	0	0	3.03827e+06	HCD	MS2	16.4037	116.886	124.171	57568	57568	57567	220621_E_102.raw	F5.2	NA	1804	4.56	2	FALSE	9.269e-06	1.473e-05	0.949
High	Sequest HT	Sequest HT (A5)	A	5	Unambiguous	DDTAVLVIDNGSGMCKAGFAGDDAPR	[D].dDTAVLVIDNGSGmckAGFAGDDAPR.[A]	4	A5A3E0; P0CG38	A5A3E0	POTE ankyrin domain family member F OS=Homo sapiens OX=9606 GN=POTEF PE=1 SV=2;POTE ankyrin domain family member I OS=Homo sapiens OX=9606 GN=POTEI PE=3 SV=1	A5A3E0; P0CG39; Q6S8J3; P0CG38	POTE ankyrin domain family member F OS=Homo sapiens OX=9606 GN=POTEF PE=1 SV=2; POTE ankyrin domain family member J OS=Homo sapiens OX=9606 GN=POTEJ PE=3 SV=1; POTE ankyrin domain family member E OS=Homo sapiens OX=9606 GN=POTEE PE=2 SV=3; POTE ankyrin domain family member I OS=Homo sapiens OX=9606 GN=POTEI PE=3 SV=1	0	3	3	0.6287	0	1	1	1	972.122	972.122	2914.35	2914.36	-1.75	-0.0017	0/0	0	0	3.42819e+06	HCD	MS2	43.1118	88.915	114.006	52308	52308	52302	220621_E_103.raw	F5.3	NoneMonoisotopic	1746	5.09	2	FALSE	9.269e-06	2.238e-07	1.406
High	Sequest HT	Sequest HT (A5)	A	5	Unambiguous	DDTAVLVIDNGSGMCKAGFAGDDAPR	[D].dDTAVLVIDNGSGMckAGFAGDDAPR.[A]	4	A5A3E0; P0CG38	A5A3E0	POTE ankyrin domain family member F OS=Homo sapiens OX=9606 GN=POTEF PE=1 SV=2;POTE ankyrin domain family member I OS=Homo sapiens OX=9606 GN=POTEI PE=3 SV=1	A5A3E0; P0CG39; Q6S8J3; P0CG38	POTE ankyrin domain family member F OS=Homo sapiens OX=9606 GN=POTEF PE=1 SV=2; POTE ankyrin domain family member J OS=Homo sapiens OX=9606 GN=POTEJ PE=3 SV=1; POTE ankyrin domain family member E OS=Homo sapiens OX=9606 GN=POTEE PE=2 SV=3; POTE ankyrin domain family member I OS=Homo sapiens OX=9606 GN=POTEI PE=3 SV=1	0	3	0	0.645	0	1	1	1	966.785	966.785	2898.34	2898.36	-8.17	-0.00789	0/0	0	0	6.95559e+06	HCD	MS2	60.7307	52.613	121.224	55439	55439	55435	220621_E_103.raw	F5.3	NoneMonoisotopic	1698	5.24	2	FALSE	9.269e-06	8.08e-06	1.015
High	Sequest HT	Sequest HT (A5)	A	5	Selected	DDTAVLVIDNGSGMCKAGFAGDDAPR	[D].dDTAVLVIDNGSGmckAGFAGDDAPR.[A]	4	A5A3E0; P0CG38	A5A3E0	POTE ankyrin domain family member F OS=Homo sapiens OX=9606 GN=POTEF PE=1 SV=2;POTE ankyrin domain family member I OS=Homo sapiens OX=9606 GN=POTEI PE=3 SV=1	A5A3E0; P0CG39; Q6S8J3; P0CG38	POTE ankyrin domain family member F OS=Homo sapiens OX=9606 GN=POTEF PE=1 SV=2; POTE ankyrin domain family member J OS=Homo sapiens OX=9606 GN=POTEJ PE=3 SV=1; POTE ankyrin domain family member E OS=Homo sapiens OX=9606 GN=POTEE PE=2 SV=3; POTE ankyrin domain family member I OS=Homo sapiens OX=9606 GN=POTEI PE=3 SV=1	0	3	0	0.3962	0	1	1	1	972.125	972.125	2914.36	2914.36	0.69	0.00067	0/0	0	0	3.04486e+06	HCD	MS2	69.2832	90.764	121.265	55460	55460	55448	220621_E_103.raw	F5.3	NA	1884	3.18	2	FALSE	0.008391	0.08	0.021
High	Sequest HT	Sequest HT (A5)	A	5	Unambiguous	DDTAVLVIDNGSGMCKAGFAGDDAPR	[D].dDTAVLVIDNGSGmckAGFAGDDAPR.[A]	4	A5A3E0; P0CG38	A5A3E0	POTE ankyrin domain family member F OS=Homo sapiens OX=9606 GN=POTEF PE=1 SV=2;POTE ankyrin domain family member I OS=Homo sapiens OX=9606 GN=POTEI PE=3 SV=1	A5A3E0; P0CG39; Q6S8J3; P0CG38	POTE ankyrin domain family member F OS=Homo sapiens OX=9606 GN=POTEF PE=1 SV=2; POTE ankyrin domain family member J OS=Homo sapiens OX=9606 GN=POTEJ PE=3 SV=1; POTE ankyrin domain family member E OS=Homo sapiens OX=9606 GN=POTEE PE=2 SV=3; POTE ankyrin domain family member I OS=Homo sapiens OX=9606 GN=POTEI PE=3 SV=1	0	3	0	0.6022	0	1	1	1	972.119	972.118	2914.34	2914.36	-5.71	-0.00555	0/0	0	0	3.56151e+06	HCD	MS2	70.7484	87.506	112.674	52508	52508	52497	220621_E_104.raw	F5.4	NA	1554	4.6	2	FALSE	3.982e-05	0.0001289	0.706
High	Sequest HT	Sequest HT (A5)	A	5	Unambiguous	DDTAVLVIDNGSGMCKAGFAGDDAPR	[D].dDTAVLVIDNGSGMckAGFAGDDAPR.[A]	4	A5A3E0; P0CG38	A5A3E0	POTE ankyrin domain family member F OS=Homo sapiens OX=9606 GN=POTEF PE=1 SV=2;POTE ankyrin domain family member I OS=Homo sapiens OX=9606 GN=POTEI PE=3 SV=1	A5A3E0; P0CG39; Q6S8J3; P0CG38	POTE ankyrin domain family member F OS=Homo sapiens OX=9606 GN=POTEF PE=1 SV=2; POTE ankyrin domain family member J OS=Homo sapiens OX=9606 GN=POTEJ PE=3 SV=1; POTE ankyrin domain family member E OS=Homo sapiens OX=9606 GN=POTEE PE=2 SV=3; POTE ankyrin domain family member I OS=Homo sapiens OX=9606 GN=POTEI PE=3 SV=1	0	3	0	0.6497	0	1	1	1	966.786	966.786	2898.34	2898.36	-6.64	-0.00642	0/0	0	0	3275347	HCD	MS2	49.3115	89.645	114.938	53559	53559	53550	220621_E_104.raw	F5.4	NoneMonoisotopic	1771	5.31	2	FALSE	9.269e-06	3.422e-05	0.857
High	Sequest HT	Sequest HT (A5)	A	5	Selected	DDTAVLVIDNGSGMCKAGFAGDDAPR	[D].dDTAVLVIDNGSGMckAGFAGDDAPR.[A]	4	A5A3E0; P0CG38	A5A3E0	POTE ankyrin domain family member F OS=Homo sapiens OX=9606 GN=POTEF PE=1 SV=2;POTE ankyrin domain family member I OS=Homo sapiens OX=9606 GN=POTEI PE=3 SV=1	A5A3E0; P0CG39; Q6S8J3; P0CG38	POTE ankyrin domain family member F OS=Homo sapiens OX=9606 GN=POTEF PE=1 SV=2; POTE ankyrin domain family member J OS=Homo sapiens OX=9606 GN=POTEJ PE=3 SV=1; POTE ankyrin domain family member E OS=Homo sapiens OX=9606 GN=POTEE PE=2 SV=3; POTE ankyrin domain family member I OS=Homo sapiens OX=9606 GN=POTEI PE=3 SV=1	0	3	3	0.4431	0	1	1	1	966.795	966.795	2898.37	2898.36	2.54	0.00245	0/0	0	0	2.17452e+06	HCD	MS2	46.9606	120	120.233	55860	55860	55851	220621_E_104.raw	F5.4	NoneMonoisotopic	2271	4.22	2	FALSE	3.982e-05	0.0001479	0.69
High	Sequest HT	Sequest HT (A5)	A	5	Selected	DDTAVLVIDNGSGMCKAGFAGDDAPR	[D].dDTAVLVIDNGSGMckAGFAGDDAPR.[A]	4	A5A3E0; P0CG38	A5A3E0	POTE ankyrin domain family member F OS=Homo sapiens OX=9606 GN=POTEF PE=1 SV=2;POTE ankyrin domain family member I OS=Homo sapiens OX=9606 GN=POTEI PE=3 SV=1	A5A3E0; P0CG39; Q6S8J3; P0CG38	POTE ankyrin domain family member F OS=Homo sapiens OX=9606 GN=POTEF PE=1 SV=2; POTE ankyrin domain family member J OS=Homo sapiens OX=9606 GN=POTEJ PE=3 SV=1; POTE ankyrin domain family member E OS=Homo sapiens OX=9606 GN=POTEE PE=2 SV=3; POTE ankyrin domain family member I OS=Homo sapiens OX=9606 GN=POTEI PE=3 SV=1	0	3	0	0.5592	0	1	1	1	966.788	966.788	2898.35	2898.36	-4.82	-0.00465	0/0	0	0	2645140	HCD	MS2	92.6619	39.221	121.207	56132	56132	56124	220621_E_105.raw	F5.5	NoneMonoisotopic	1878	3.63	2	FALSE	3.982e-05	9.628e-05	0.74
High	Sequest HT	Sequest HT (A5)	A	5	Unambiguous	DDTAVLVIDNGSGMCKAGFAGDDAPR	[D].dDTAVLVIDNGSGmckAGFAGDDAPR.[A]	4	A5A3E0; P0CG38	A5A3E0	POTE ankyrin domain family member F OS=Homo sapiens OX=9606 GN=POTEF PE=1 SV=2;POTE ankyrin domain family member I OS=Homo sapiens OX=9606 GN=POTEI PE=3 SV=1	A5A3E0; P0CG39; Q6S8J3; P0CG38	POTE ankyrin domain family member F OS=Homo sapiens OX=9606 GN=POTEF PE=1 SV=2; POTE ankyrin domain family member J OS=Homo sapiens OX=9606 GN=POTEJ PE=3 SV=1; POTE ankyrin domain family member E OS=Homo sapiens OX=9606 GN=POTEE PE=2 SV=3; POTE ankyrin domain family member I OS=Homo sapiens OX=9606 GN=POTEI PE=3 SV=1	0	3	0	0.5512	0	1	1	1	972.122	972.121	2914.35	2914.36	-2.56	-0.00249	0/0	0	0	3.52257e+06	HCD	MS2	68.9872	90.785	112.569	51922	51922	51912	220621_E_106.raw	F5.6	NA	1718	4.3	2	FALSE	9.269e-06	1.386e-05	0.956
High	Sequest HT	Sequest HT (A5)	A	5	Unambiguous	DDTAVLVIDNGSGMCKAGFAGDDAPR	[D].dDTAVLVIDNGSGmckAGFAGDDAPR.[A]	4	A5A3E0; P0CG38	A5A3E0	POTE ankyrin domain family member F OS=Homo sapiens OX=9606 GN=POTEF PE=1 SV=2;POTE ankyrin domain family member I OS=Homo sapiens OX=9606 GN=POTEI PE=3 SV=1	A5A3E0; P0CG39; Q6S8J3; P0CG38	POTE ankyrin domain family member F OS=Homo sapiens OX=9606 GN=POTEF PE=1 SV=2; POTE ankyrin domain family member J OS=Homo sapiens OX=9606 GN=POTEJ PE=3 SV=1; POTE ankyrin domain family member E OS=Homo sapiens OX=9606 GN=POTEE PE=2 SV=3; POTE ankyrin domain family member I OS=Homo sapiens OX=9606 GN=POTEI PE=3 SV=1	0	2	2	0.6676	0	1	1	1	1457.67	1457.67	2914.33	2914.36	-7.96	-0.0116	0/0	0	0	2.29641e+06	HCD	MS2	0	120	114.705	52604	52604	52601	220621_E_107.raw	F5.7	NA	1479	3.73	2	FALSE	3.982e-05	0.0001033	0.732
High	Sequest HT	Sequest HT (A5)	A	5	Unambiguous	DDTAVLVIDNGSGMCKAGFAGDDAPR	[D].dDTAVLVIDNGSGmckAGFAGDDAPR.[A]	4	A5A3E0; P0CG38	A5A3E0	POTE ankyrin domain family member F OS=Homo sapiens OX=9606 GN=POTEF PE=1 SV=2;POTE ankyrin domain family member I OS=Homo sapiens OX=9606 GN=POTEI PE=3 SV=1	A5A3E0; P0CG39; Q6S8J3; P0CG38	POTE ankyrin domain family member F OS=Homo sapiens OX=9606 GN=POTEF PE=1 SV=2; POTE ankyrin domain family member J OS=Homo sapiens OX=9606 GN=POTEJ PE=3 SV=1; POTE ankyrin domain family member E OS=Homo sapiens OX=9606 GN=POTEE PE=2 SV=3; POTE ankyrin domain family member I OS=Homo sapiens OX=9606 GN=POTEI PE=3 SV=1	0	2	2	0.6484	0	1	1	1	1457.67	1457.67	2914.34	2914.36	-7.43	-0.01083	0/0	0	0	2.54608e+06	HCD	MS2	0	111.808	112.836	50472	50472	50469	220621_E_108.raw	F5.8	NA	1487	3.84	2	FALSE	0.0003025	0.002245	0.399
High	Sequest HT	Sequest HT (A5)	A	5	Unambiguous	DDTAVLVIDNGSGMCKAGFAGDDAPR	[D].dDTAVLVIDNGSGmckAGFAGDDAPR.[A]	4	A5A3E0; P0CG38	A5A3E0	POTE ankyrin domain family member F OS=Homo sapiens OX=9606 GN=POTEF PE=1 SV=2;POTE ankyrin domain family member I OS=Homo sapiens OX=9606 GN=POTEI PE=3 SV=1	A5A3E0; P0CG39; Q6S8J3; P0CG38	POTE ankyrin domain family member F OS=Homo sapiens OX=9606 GN=POTEF PE=1 SV=2; POTE ankyrin domain family member J OS=Homo sapiens OX=9606 GN=POTEJ PE=3 SV=1; POTE ankyrin domain family member E OS=Homo sapiens OX=9606 GN=POTEE PE=2 SV=3; POTE ankyrin domain family member I OS=Homo sapiens OX=9606 GN=POTEI PE=3 SV=1	0	3	3	0.6091	0	1	1	1	972.115	972.115	2914.33	2914.36	-9.09	-0.00883	0/0	0	0	7.50167e+06	HCD	MS2	7.40048	22.748	115.342	51627	51627	51626	220621_E_108.raw	F5.8	NA	1440	4.4	2	FALSE	9.516e-05	0.0005287	0.549
High	Sequest HT	Sequest HT (A5)	A	5	Unambiguous	DDTAVLVIDNGSGMCKAGFAGDDAPR	[D].dDTAVLVIDNGSGmckAGFAGDDAPR.[A]	4	A5A3E0; P0CG38	A5A3E0	POTE ankyrin domain family member F OS=Homo sapiens OX=9606 GN=POTEF PE=1 SV=2;POTE ankyrin domain family member I OS=Homo sapiens OX=9606 GN=POTEI PE=3 SV=1	A5A3E0; P0CG39; Q6S8J3; P0CG38	POTE ankyrin domain family member F OS=Homo sapiens OX=9606 GN=POTEF PE=1 SV=2; POTE ankyrin domain family member J OS=Homo sapiens OX=9606 GN=POTEJ PE=3 SV=1; POTE ankyrin domain family member E OS=Homo sapiens OX=9606 GN=POTEE PE=2 SV=3; POTE ankyrin domain family member I OS=Homo sapiens OX=9606 GN=POTEI PE=3 SV=1	0	3	3	0.5778	0	1	1	1	972.116	972.116	2914.33	2914.36	-7.94	-0.00771	0/0	0	0	2.12553e+06	HCD	MS2	16.9344	112.313	117.467	52524	52524	52523	220621_E_108.raw	F5.8	NA	1481	4.24	2	FALSE	0.001621	0.01445	0.21
High	Sequest HT	Sequest HT (A5)	A	5	Unambiguous	DDTAVLVIDNGSGMCKAGFAGDDAPR	[D].dDTAVLVIDNGSGmckAGFAGDDAPR.[A]	4	A5A3E0; P0CG38	A5A3E0	POTE ankyrin domain family member F OS=Homo sapiens OX=9606 GN=POTEF PE=1 SV=2;POTE ankyrin domain family member I OS=Homo sapiens OX=9606 GN=POTEI PE=3 SV=1	A5A3E0; P0CG39; Q6S8J3; P0CG38	POTE ankyrin domain family member F OS=Homo sapiens OX=9606 GN=POTEF PE=1 SV=2; POTE ankyrin domain family member J OS=Homo sapiens OX=9606 GN=POTEJ PE=3 SV=1; POTE ankyrin domain family member E OS=Homo sapiens OX=9606 GN=POTEE PE=2 SV=3; POTE ankyrin domain family member I OS=Homo sapiens OX=9606 GN=POTEI PE=3 SV=1	0	3	3	0.621	0	1	1	1	972.117	972.117	2914.34	2914.36	-7.68	-0.00746	0/0	0	0	1.4094e+06	HCD	MS2	27.8423	120	118.518	52940	52940	52939	220621_E_108.raw	F5.8	NA	1472	4.38	2	FALSE	3.982e-05	0.000179	0.669
High	Sequest HT	Sequest HT (A5)	A	5	Unambiguous	DDTAVLVIDNGSGMCKAGFAGDDAPR	[D].dDTAVLVIDNGSGmckAGFAGDDAPR.[A]	4	A5A3E0; P0CG38	A5A3E0	POTE ankyrin domain family member F OS=Homo sapiens OX=9606 GN=POTEF PE=1 SV=2;POTE ankyrin domain family member I OS=Homo sapiens OX=9606 GN=POTEI PE=3 SV=1	A5A3E0; P0CG39; Q6S8J3; P0CG38	POTE ankyrin domain family member F OS=Homo sapiens OX=9606 GN=POTEF PE=1 SV=2; POTE ankyrin domain family member J OS=Homo sapiens OX=9606 GN=POTEJ PE=3 SV=1; POTE ankyrin domain family member E OS=Homo sapiens OX=9606 GN=POTEE PE=2 SV=3; POTE ankyrin domain family member I OS=Homo sapiens OX=9606 GN=POTEI PE=3 SV=1	0	2	0	0.7206	0	1	1	1	1457.68	1457.67	2914.34	2914.36	-4.51	-0.00657	0/0	0	0	1797952	HCD	MS2	61.558	120	113.298	49050	49050	49039	220621_E_110.raw	F5.10	NoneMonoisotopic	1621	4.51	2	FALSE	9.269e-06	3.554e-07	1.356
High	Sequest HT	Sequest HT (A5)	A	5	Selected	DDTAVLVIDNGSGMCKAGFAGDDAPR	[D].dDTAVLVIDNGSGmckAGFAGDDAPR.[A]	4	A5A3E0; P0CG38	A5A3E0	POTE ankyrin domain family member F OS=Homo sapiens OX=9606 GN=POTEF PE=1 SV=2;POTE ankyrin domain family member I OS=Homo sapiens OX=9606 GN=POTEI PE=3 SV=1	A5A3E0; P0CG39; Q6S8J3; P0CG38	POTE ankyrin domain family member F OS=Homo sapiens OX=9606 GN=POTEF PE=1 SV=2; POTE ankyrin domain family member J OS=Homo sapiens OX=9606 GN=POTEJ PE=3 SV=1; POTE ankyrin domain family member E OS=Homo sapiens OX=9606 GN=POTEE PE=2 SV=3; POTE ankyrin domain family member I OS=Homo sapiens OX=9606 GN=POTEI PE=3 SV=1	0	3	3	0.5148	0	1	1	1	972.129	972.129	2914.37	2914.36	4.92	0.00478	0/0	0	0	518404	HCD	MS2	67.1264	120	118.383	51273	51273	51262	220621_E_110.raw	F5.10	NA	2123	3.71	2	FALSE	0.005881	0.05582	0.06
High	Sequest HT	Sequest HT (A5)	A	5	Unambiguous	DDTAVLVIDNGSGMCKAGFAGDDAPR	[D].dDTAVLVIDNGSGmckAGFAGDDAPR.[A]	4	A5A3E0; P0CG38	A5A3E0	POTE ankyrin domain family member F OS=Homo sapiens OX=9606 GN=POTEF PE=1 SV=2;POTE ankyrin domain family member I OS=Homo sapiens OX=9606 GN=POTEI PE=3 SV=1	A5A3E0; P0CG39; Q6S8J3; P0CG38	POTE ankyrin domain family member F OS=Homo sapiens OX=9606 GN=POTEF PE=1 SV=2; POTE ankyrin domain family member J OS=Homo sapiens OX=9606 GN=POTEJ PE=3 SV=1; POTE ankyrin domain family member E OS=Homo sapiens OX=9606 GN=POTEE PE=2 SV=3; POTE ankyrin domain family member I OS=Homo sapiens OX=9606 GN=POTEI PE=3 SV=1	0	3	3	0.6293	0	1	1	1	972.118	972.118	2914.34	2914.36	-6.53	-0.00634	0/0	0	0	1781224	HCD	MS2	20.3629	113.696	118.64	51387	51387	51379	220621_E_110.raw	F5.10	NA	1526	4.64	2	FALSE	0.0001782	0.001223	0.461
High	Sequest HT	Sequest HT (A5)	A	5	Unambiguous	DDTAVLVIDNGSGMCKAGFAGDDAPR	[D].dDTAVLVIDNGSGMckAGFAGDDAPR.[A]	4	A5A3E0; P0CG38	A5A3E0	POTE ankyrin domain family member F OS=Homo sapiens OX=9606 GN=POTEF PE=1 SV=2;POTE ankyrin domain family member I OS=Homo sapiens OX=9606 GN=POTEI PE=3 SV=1	A5A3E0; P0CG39; Q6S8J3; P0CG38	POTE ankyrin domain family member F OS=Homo sapiens OX=9606 GN=POTEF PE=1 SV=2; POTE ankyrin domain family member J OS=Homo sapiens OX=9606 GN=POTEJ PE=3 SV=1; POTE ankyrin domain family member E OS=Homo sapiens OX=9606 GN=POTEE PE=2 SV=3; POTE ankyrin domain family member I OS=Homo sapiens OX=9606 GN=POTEI PE=3 SV=1	0	3	3	0.6071	0	1	1	1	966.785	966.785	2898.34	2898.36	-8.03	-0.00776	0/0	0	0	2.09959e+06	HCD	MS2	0	120	127.169	55051	55051	55045	220621_E_110.raw	F5.10	NA	1688	3.97	2	FALSE	0.0001938	0.001506	0.439
High	Sequest HT	Sequest HT (A5)	A	5	Unambiguous	DDTAVLVIDNGSGMCKAGFAGDDAPR	[D].dDTAVLVIDNGSGmckAGFAGDDAPR.[A]	4	A5A3E0; P0CG38	A5A3E0	POTE ankyrin domain family member F OS=Homo sapiens OX=9606 GN=POTEF PE=1 SV=2;POTE ankyrin domain family member I OS=Homo sapiens OX=9606 GN=POTEI PE=3 SV=1	A5A3E0; P0CG39; Q6S8J3; P0CG38	POTE ankyrin domain family member F OS=Homo sapiens OX=9606 GN=POTEF PE=1 SV=2; POTE ankyrin domain family member J OS=Homo sapiens OX=9606 GN=POTEJ PE=3 SV=1; POTE ankyrin domain family member E OS=Homo sapiens OX=9606 GN=POTEE PE=2 SV=3; POTE ankyrin domain family member I OS=Homo sapiens OX=9606 GN=POTEI PE=3 SV=1	0	3	3	0.6735	0	1	1	1	972.117	972.116	2914.34	2914.36	-7.74	-0.00752	0/0	0	0	884175	HCD	MS2	10.8068	120	109.876	50442	50442	50430	220621_E_111.raw	F5.11	NoneMonoisotopic	1479	4.87	2	FALSE	0.0001144	0.0009046	0.492
High	Sequest HT	Sequest HT (A5)	A	5	Unambiguous	DDTAVLVIDNGSGMCKAGFAGDDAPR	[D].dDTAVLVIDNGSGmckAGFAGDDAPR.[A]	4	A5A3E0; P0CG38	A5A3E0	POTE ankyrin domain family member F OS=Homo sapiens OX=9606 GN=POTEF PE=1 SV=2;POTE ankyrin domain family member I OS=Homo sapiens OX=9606 GN=POTEI PE=3 SV=1	A5A3E0; P0CG39; Q6S8J3; P0CG38	POTE ankyrin domain family member F OS=Homo sapiens OX=9606 GN=POTEF PE=1 SV=2; POTE ankyrin domain family member J OS=Homo sapiens OX=9606 GN=POTEJ PE=3 SV=1; POTE ankyrin domain family member E OS=Homo sapiens OX=9606 GN=POTEE PE=2 SV=3; POTE ankyrin domain family member I OS=Homo sapiens OX=9606 GN=POTEI PE=3 SV=1	0	2	2	0.7506	0	1	1	1	1457.67	1457.67	2914.34	2914.36	-6.73	-0.00981	0/0	0	0	1.89656e+06	HCD	MS2	0	120	111.634	51212	51212	51210	220621_E_111.raw	F5.11	NA	1508	4.29	2	FALSE	7.925e-05	0.0004085	0.577
High	Sequest HT	Sequest HT (A5)	A	5	Selected	DDTAVLVIDNGSGMCKAGFAGDDAPR	[D].dDTAVLVIDNGSGmckAGFAGDDAPR.[A]	4	A5A3E0; P0CG38	A5A3E0	POTE ankyrin domain family member F OS=Homo sapiens OX=9606 GN=POTEF PE=1 SV=2;POTE ankyrin domain family member I OS=Homo sapiens OX=9606 GN=POTEI PE=3 SV=1	A5A3E0; P0CG39; Q6S8J3; P0CG38	POTE ankyrin domain family member F OS=Homo sapiens OX=9606 GN=POTEF PE=1 SV=2; POTE ankyrin domain family member J OS=Homo sapiens OX=9606 GN=POTEJ PE=3 SV=1; POTE ankyrin domain family member E OS=Homo sapiens OX=9606 GN=POTEE PE=2 SV=3; POTE ankyrin domain family member I OS=Homo sapiens OX=9606 GN=POTEI PE=3 SV=1	0	2	0	0.6058	0	1	1	1	1457.68	1457.67	2914.34	2914.36	-4.37	-0.00637	0/0	0	0	4447362	HCD	MS2	64.6007	109.648	112.28	51503	51503	51496	220621_E_111.raw	F5.11	NoneMonoisotopic	1623	4.82	2	FALSE	9.269e-06	2.549e-07	1.392
High	Sequest HT	Sequest HT (A5)	A	5	Unambiguous	DDTAVLVIDNGSGMCKAGFAGDDAPR	[D].dDTAVLVIDNGSGmckAGFAGDDAPR.[A]	4	A5A3E0; P0CG38	A5A3E0	POTE ankyrin domain family member F OS=Homo sapiens OX=9606 GN=POTEF PE=1 SV=2;POTE ankyrin domain family member I OS=Homo sapiens OX=9606 GN=POTEI PE=3 SV=1	A5A3E0; P0CG39; Q6S8J3; P0CG38	POTE ankyrin domain family member F OS=Homo sapiens OX=9606 GN=POTEF PE=1 SV=2; POTE ankyrin domain family member J OS=Homo sapiens OX=9606 GN=POTEJ PE=3 SV=1; POTE ankyrin domain family member E OS=Homo sapiens OX=9606 GN=POTEE PE=2 SV=3; POTE ankyrin domain family member I OS=Homo sapiens OX=9606 GN=POTEI PE=3 SV=1	0	2	0	0.7295	0	1	1	1	1457.68	1457.67	2914.34	2914.36	-4.78	-0.00697	0/0	0	0	50508520	HCD	MS2	66.4245	9.531	112.48	51607	51607	51600	220621_E_111.raw	F5.11	NA	1609	5.36	2	FALSE	9.269e-06	8.236e-07	1.264
High	Sequest HT	Sequest HT (A5)	A	5	Unambiguous	DDTAVLVIDNGSGMCKAGFAGDDAPR	[D].dDTAVLVIDNGSGmckAGFAGDDAPR.[A]	4	A5A3E0; P0CG38	A5A3E0	POTE ankyrin domain family member F OS=Homo sapiens OX=9606 GN=POTEF PE=1 SV=2;POTE ankyrin domain family member I OS=Homo sapiens OX=9606 GN=POTEI PE=3 SV=1	A5A3E0; P0CG39; Q6S8J3; P0CG38	POTE ankyrin domain family member F OS=Homo sapiens OX=9606 GN=POTEF PE=1 SV=2; POTE ankyrin domain family member J OS=Homo sapiens OX=9606 GN=POTEJ PE=3 SV=1; POTE ankyrin domain family member E OS=Homo sapiens OX=9606 GN=POTEE PE=2 SV=3; POTE ankyrin domain family member I OS=Homo sapiens OX=9606 GN=POTEI PE=3 SV=1	0	2	2	0.6908	0	1	1	1	1457.68	1457.68	2914.35	2914.36	-3.51	-0.00512	0/0	0	0	3.75667e+06	HCD	MS2	14.3994	120	113.332	52039	52039	52029	220621_E_111.raw	F5.11	NA	1682	5.11	2	FALSE	9.269e-06	4.569e-07	1.328
High	Sequest HT	Sequest HT (A5)	A	5	Unambiguous	DDTAVLVIDNGSGMCKAGFAGDDAPR	[D].dDTAVLVIDNGSGmckAGFAGDDAPR.[A]	4	A5A3E0; P0CG38	A5A3E0	POTE ankyrin domain family member F OS=Homo sapiens OX=9606 GN=POTEF PE=1 SV=2;POTE ankyrin domain family member I OS=Homo sapiens OX=9606 GN=POTEI PE=3 SV=1	A5A3E0; P0CG39; Q6S8J3; P0CG38	POTE ankyrin domain family member F OS=Homo sapiens OX=9606 GN=POTEF PE=1 SV=2; POTE ankyrin domain family member J OS=Homo sapiens OX=9606 GN=POTEJ PE=3 SV=1; POTE ankyrin domain family member E OS=Homo sapiens OX=9606 GN=POTEE PE=2 SV=3; POTE ankyrin domain family member I OS=Homo sapiens OX=9606 GN=POTEI PE=3 SV=1	0	2	0	0.6735	0	1	1	1	1457.68	1457.68	2914.35	2914.36	-2.08	-0.00303	0/0	0	0	4410005	HCD	MS2	63.0946	117.545	113.921	52301	52301	52289	220621_E_111.raw	F5.11	NoneMonoisotopic	1730	5.33	2	FALSE	9.269e-06	1.573e-07	1.445
High	Sequest HT	Sequest HT (A5)	A	5	Unambiguous	DDTAVLVIDNGSGMCKAGFAGDDAPR	[D].dDTAVLVIDNGSGmckAGFAGDDAPR.[A]	4	A5A3E0; P0CG38	A5A3E0	POTE ankyrin domain family member F OS=Homo sapiens OX=9606 GN=POTEF PE=1 SV=2;POTE ankyrin domain family member I OS=Homo sapiens OX=9606 GN=POTEI PE=3 SV=1	A5A3E0; P0CG39; Q6S8J3; P0CG38	POTE ankyrin domain family member F OS=Homo sapiens OX=9606 GN=POTEF PE=1 SV=2; POTE ankyrin domain family member J OS=Homo sapiens OX=9606 GN=POTEJ PE=3 SV=1; POTE ankyrin domain family member E OS=Homo sapiens OX=9606 GN=POTEE PE=2 SV=3; POTE ankyrin domain family member I OS=Homo sapiens OX=9606 GN=POTEI PE=3 SV=1	0	2	2	0.6547	0	1	1	1	1457.67	1457.67	2914.34	2914.36	-7.19	-0.01048	0/0	0	0	1.28198e+06	HCD	MS2	0	120	114.499	52551	52551	52549	220621_E_111.raw	F5.11	NoneMonoisotopic	1508	4.72	2	FALSE	9.269e-06	6.37e-07	1.292
High	Sequest HT	Sequest HT (A5)	A	5	Selected	DDTAVLVIDNGSGMCKAGFAGDDAPR	[D].dDTAVLVIDNGSGmckAGFAGDDAPR.[A]	4	A5A3E0; P0CG38	A5A3E0	POTE ankyrin domain family member F OS=Homo sapiens OX=9606 GN=POTEF PE=1 SV=2;POTE ankyrin domain family member I OS=Homo sapiens OX=9606 GN=POTEI PE=3 SV=1	A5A3E0; P0CG39; Q6S8J3; P0CG38	POTE ankyrin domain family member F OS=Homo sapiens OX=9606 GN=POTEF PE=1 SV=2; POTE ankyrin domain family member J OS=Homo sapiens OX=9606 GN=POTEJ PE=3 SV=1; POTE ankyrin domain family member E OS=Homo sapiens OX=9606 GN=POTEE PE=2 SV=3; POTE ankyrin domain family member I OS=Homo sapiens OX=9606 GN=POTEI PE=3 SV=1	0	3	0	0.4752	0	1	1	1	972.124	972.123	2914.36	2914.36	-0.58	-0.00056	0/0	0	0	2.23336e+06	HCD	MS2	73.9653	120	117.703	53906	53906	53901	220621_E_111.raw	F5.11	NA	1816	4.84	2	FALSE	2.619e-05	6.714e-05	0.781
High	Sequest HT	Sequest HT (A5)	A	5	Unambiguous	DDTAVLVIDNGSGMCKAGFAGDDAPR	[D].dDTAVLVIDNGSGmckAGFAGDDAPR.[A]	4	A5A3E0; P0CG38	A5A3E0	POTE ankyrin domain family member F OS=Homo sapiens OX=9606 GN=POTEF PE=1 SV=2;POTE ankyrin domain family member I OS=Homo sapiens OX=9606 GN=POTEI PE=3 SV=1	A5A3E0; P0CG39; Q6S8J3; P0CG38	POTE ankyrin domain family member F OS=Homo sapiens OX=9606 GN=POTEF PE=1 SV=2; POTE ankyrin domain family member J OS=Homo sapiens OX=9606 GN=POTEJ PE=3 SV=1; POTE ankyrin domain family member E OS=Homo sapiens OX=9606 GN=POTEE PE=2 SV=3; POTE ankyrin domain family member I OS=Homo sapiens OX=9606 GN=POTEI PE=3 SV=1	0	3	3	0.4839	0	1	1	1	972.122	972.122	2914.35	2914.36	-2.59	-0.00252	0/0	0	0	1.6775e+06	HCD	MS2	41.5824	120	117.752	53926	53926	53914	220621_E_111.raw	F5.11	NA	1715	4.36	2	FALSE	9.269e-06	6.006e-06	1.048
High	Sequest HT	Sequest HT (A5)	A	5	Selected	DDTAVLVIDNGSGMCKAGFAGDDAPR	[D].dDTAVLVIDNGSGmckAGFAGDDAPR.[A]	4	A5A3E0; P0CG38	A5A3E0	POTE ankyrin domain family member F OS=Homo sapiens OX=9606 GN=POTEF PE=1 SV=2;POTE ankyrin domain family member I OS=Homo sapiens OX=9606 GN=POTEI PE=3 SV=1	A5A3E0; P0CG39; Q6S8J3; P0CG38	POTE ankyrin domain family member F OS=Homo sapiens OX=9606 GN=POTEF PE=1 SV=2; POTE ankyrin domain family member J OS=Homo sapiens OX=9606 GN=POTEJ PE=3 SV=1; POTE ankyrin domain family member E OS=Homo sapiens OX=9606 GN=POTEE PE=2 SV=3; POTE ankyrin domain family member I OS=Homo sapiens OX=9606 GN=POTEI PE=3 SV=1	0	3	3	0.3819	0	1	1	1	972.118	972.118	2914.34	2914.36	-6.59	-0.00641	0/0	0	0	1.47767e+06	HCD	MS2	17.2203	71.967	119.906	54884	54884	54876	220621_E_111.raw	F5.11	NA	1521	3.09	2	FALSE	0.0009292	0.008489	0.266
High	Sequest HT	Sequest HT (A5)	A	5	Unambiguous	DDTAVLVIDNGSGMCKAGFAGDDAPR	[D].dDTAVLVIDNGSGmckAGFAGDDAPR.[A]	4	A5A3E0; P0CG38	A5A3E0	POTE ankyrin domain family member F OS=Homo sapiens OX=9606 GN=POTEF PE=1 SV=2;POTE ankyrin domain family member I OS=Homo sapiens OX=9606 GN=POTEI PE=3 SV=1	A5A3E0; P0CG39; Q6S8J3; P0CG38	POTE ankyrin domain family member F OS=Homo sapiens OX=9606 GN=POTEF PE=1 SV=2; POTE ankyrin domain family member J OS=Homo sapiens OX=9606 GN=POTEJ PE=3 SV=1; POTE ankyrin domain family member E OS=Homo sapiens OX=9606 GN=POTEE PE=2 SV=3; POTE ankyrin domain family member I OS=Homo sapiens OX=9606 GN=POTEI PE=3 SV=1	0	3	3	0.5927	0	1	1	1	972.117	972.116	2914.34	2914.36	-7.66	-0.00744	0/0	0	0	1.26346e+06	HCD	MS2	17.1163	115.531	111.805	50623	50623	50612	220621_E_112.raw	F5.12	NA	1477	4.1	2	FALSE	0.00155	0.01378	0.215
High	Sequest HT	Sequest HT (A5)	A	5	Unambiguous	DDTAVLVIDNGSGMCKAGFAGDDAPR	[D].dDTAVLVIDNGSGmckAGFAGDDAPR.[A]	4	A5A3E0; P0CG38	A5A3E0	POTE ankyrin domain family member F OS=Homo sapiens OX=9606 GN=POTEF PE=1 SV=2;POTE ankyrin domain family member I OS=Homo sapiens OX=9606 GN=POTEI PE=3 SV=1	A5A3E0; P0CG39; Q6S8J3; P0CG38	POTE ankyrin domain family member F OS=Homo sapiens OX=9606 GN=POTEF PE=1 SV=2; POTE ankyrin domain family member J OS=Homo sapiens OX=9606 GN=POTEJ PE=3 SV=1; POTE ankyrin domain family member E OS=Homo sapiens OX=9606 GN=POTEE PE=2 SV=3; POTE ankyrin domain family member I OS=Homo sapiens OX=9606 GN=POTEI PE=3 SV=1	0	3	3	0.3371	0	1	1	1	972.126	972.125	2914.36	2914.36	1.59	0.00154	0/0	0	0	2.198e+06	HCD	MS2	36.4796	120	112.99	51170	51170	51158	220621_E_112.raw	F5.12	NA	1954	3.56	2	FALSE	0.002857	0.0254	0.146
High	Sequest HT	Sequest HT (A5)	A	5	Unambiguous	DDTAVLVIDNGSGMCKAGFAGDDAPR	[D].dDTAVLVIDNGSGmckAGFAGDDAPR.[A]	4	A5A3E0; P0CG38	A5A3E0	POTE ankyrin domain family member F OS=Homo sapiens OX=9606 GN=POTEF PE=1 SV=2;POTE ankyrin domain family member I OS=Homo sapiens OX=9606 GN=POTEI PE=3 SV=1	A5A3E0; P0CG39; Q6S8J3; P0CG38	POTE ankyrin domain family member F OS=Homo sapiens OX=9606 GN=POTEF PE=1 SV=2; POTE ankyrin domain family member J OS=Homo sapiens OX=9606 GN=POTEJ PE=3 SV=1; POTE ankyrin domain family member E OS=Homo sapiens OX=9606 GN=POTEE PE=2 SV=3; POTE ankyrin domain family member I OS=Homo sapiens OX=9606 GN=POTEI PE=3 SV=1	0	3	0	0.6299	0	1	1	1	972.117	972.117	2914.34	2914.36	-7.46	-0.00725	0/0	0	0	3.29024e+06	HCD	MS2	63.7146	87.252	108.877	52245	52245	52237	220621_E_201.raw	F6.1	NoneMonoisotopic	1490	5.35	2	FALSE	9.269e-06	1.8e-05	0.927
High	Sequest HT	Sequest HT (A5)	A	5	Unambiguous	DDTAVLVIDNGSGMCKAGFAGDDAPR	[D].dDTAVLVIDNGSGmckAGFAGDDAPR.[A]	4	A5A3E0; P0CG38	A5A3E0	POTE ankyrin domain family member F OS=Homo sapiens OX=9606 GN=POTEF PE=1 SV=2;POTE ankyrin domain family member I OS=Homo sapiens OX=9606 GN=POTEI PE=3 SV=1	A5A3E0; P0CG39; Q6S8J3; P0CG38	POTE ankyrin domain family member F OS=Homo sapiens OX=9606 GN=POTEF PE=1 SV=2; POTE ankyrin domain family member J OS=Homo sapiens OX=9606 GN=POTEJ PE=3 SV=1; POTE ankyrin domain family member E OS=Homo sapiens OX=9606 GN=POTEE PE=2 SV=3; POTE ankyrin domain family member I OS=Homo sapiens OX=9606 GN=POTEI PE=3 SV=1	0	2	0	0.652	0	1	1	1	1457.68	1457.68	2914.35	2914.36	-1.65	-0.0024	0/0	0	0	4.17732e+06	HCD	MS2	40.1794	104.702	109.787	52688	52688	52679	220621_E_201.raw	F6.1	NA	1748	4.77	2	FALSE	9.269e-06	5.036e-06	1.067
High	Sequest HT	Sequest HT (A5)	A	5	Unambiguous	DDTAVLVIDNGSGMCKAGFAGDDAPR	[D].dDTAVLVIDNGSGmckAGFAGDDAPR.[A]	4	A5A3E0; P0CG38	A5A3E0	POTE ankyrin domain family member F OS=Homo sapiens OX=9606 GN=POTEF PE=1 SV=2;POTE ankyrin domain family member I OS=Homo sapiens OX=9606 GN=POTEI PE=3 SV=1	A5A3E0; P0CG39; Q6S8J3; P0CG38	POTE ankyrin domain family member F OS=Homo sapiens OX=9606 GN=POTEF PE=1 SV=2; POTE ankyrin domain family member J OS=Homo sapiens OX=9606 GN=POTEJ PE=3 SV=1; POTE ankyrin domain family member E OS=Homo sapiens OX=9606 GN=POTEE PE=2 SV=3; POTE ankyrin domain family member I OS=Homo sapiens OX=9606 GN=POTEI PE=3 SV=1	0	2	0	0.6169	0	1	1	1	1457.67	1457.68	2914.34	2914.36	-5.15	-0.0075	0/0	0	0	3.69626e+06	HCD	MS2	65.7227	120	112.944	54218	54218	54213	220621_E_201.raw	F6.1	NA	1577	5.22	2	FALSE	9.269e-06	7.536e-07	1.274
High	Sequest HT	Sequest HT (A5)	A	5	Unambiguous	DDTAVLVIDNGSGMCKAGFAGDDAPR	[D].dDTAVLVIDNGSGmckAGFAGDDAPR.[A]	4	A5A3E0; P0CG38	A5A3E0	POTE ankyrin domain family member F OS=Homo sapiens OX=9606 GN=POTEF PE=1 SV=2;POTE ankyrin domain family member I OS=Homo sapiens OX=9606 GN=POTEI PE=3 SV=1	A5A3E0; P0CG39; Q6S8J3; P0CG38	POTE ankyrin domain family member F OS=Homo sapiens OX=9606 GN=POTEF PE=1 SV=2; POTE ankyrin domain family member J OS=Homo sapiens OX=9606 GN=POTEJ PE=3 SV=1; POTE ankyrin domain family member E OS=Homo sapiens OX=9606 GN=POTEE PE=2 SV=3; POTE ankyrin domain family member I OS=Homo sapiens OX=9606 GN=POTEI PE=3 SV=1	0	3	3	0.6351	0	1	1	1	972.117	972.117	2914.34	2914.36	-6.99	-0.00679	0/0	0	0	16249911	HCD	MS2	22.4675	10.468	113.746	54605	54605	54603	220621_E_201.raw	F6.1	NA	1506	4.96	2	FALSE	9.269e-06	6.628e-07	1.288
High	Sequest HT	Sequest HT (A5)	A	5	Unambiguous	DDTAVLVIDNGSGMCKAGFAGDDAPR	[D].dDTAVLVIDNGSGmckAGFAGDDAPR.[A]	4	A5A3E0; P0CG38	A5A3E0	POTE ankyrin domain family member F OS=Homo sapiens OX=9606 GN=POTEF PE=1 SV=2;POTE ankyrin domain family member I OS=Homo sapiens OX=9606 GN=POTEI PE=3 SV=1	A5A3E0; P0CG39; Q6S8J3; P0CG38	POTE ankyrin domain family member F OS=Homo sapiens OX=9606 GN=POTEF PE=1 SV=2; POTE ankyrin domain family member J OS=Homo sapiens OX=9606 GN=POTEJ PE=3 SV=1; POTE ankyrin domain family member E OS=Homo sapiens OX=9606 GN=POTEE PE=2 SV=3; POTE ankyrin domain family member I OS=Homo sapiens OX=9606 GN=POTEI PE=3 SV=1	0	3	3	0.608	0	1	1	1	972.121	972.121	2914.35	2914.36	-3.08	-0.00299	0/0	0	0	2.44778e+06	HCD	MS2	76.5965	120	116.922	56099	56099	56098	220621_E_201.raw	F6.1	NA	1698	4.49	2	FALSE	3.982e-05	8.104e-05	0.76
High	Sequest HT	Sequest HT (A5)	A	5	Selected	DDTAVLVIDNGSGMCKAGFAGDDAPR	[D].dDTAVLVIDNGSGMckAGFAGDDAPR.[A]	4	A5A3E0; P0CG38	A5A3E0	POTE ankyrin domain family member F OS=Homo sapiens OX=9606 GN=POTEF PE=1 SV=2;POTE ankyrin domain family member I OS=Homo sapiens OX=9606 GN=POTEI PE=3 SV=1	A5A3E0; P0CG39; Q6S8J3; P0CG38	POTE ankyrin domain family member F OS=Homo sapiens OX=9606 GN=POTEF PE=1 SV=2; POTE ankyrin domain family member J OS=Homo sapiens OX=9606 GN=POTEJ PE=3 SV=1; POTE ankyrin domain family member E OS=Homo sapiens OX=9606 GN=POTEE PE=2 SV=3; POTE ankyrin domain family member I OS=Homo sapiens OX=9606 GN=POTEI PE=3 SV=1	0	2	2	0.5707	0	1	1	1	1449.67	1449.67	2898.34	2898.36	-8.28	-0.01201	0/0	0	0	2.18028e+06	HCD	MS2	0	120	121.914	58455	58455	58451	220621_E_201.raw	F6.1	NA	1690	3.96	2	FALSE	7.925e-05	0.000325	0.602
High	Sequest HT	Sequest HT (A5)	A	5	Selected	DDTAVLVIDNGSGMCKAGFAGDDAPR	[D].dDTAVLVIDNGSGmckAGFAGDDAPR.[A]	4	A5A3E0; P0CG38	A5A3E0	POTE ankyrin domain family member F OS=Homo sapiens OX=9606 GN=POTEF PE=1 SV=2;POTE ankyrin domain family member I OS=Homo sapiens OX=9606 GN=POTEI PE=3 SV=1	A5A3E0; P0CG39; Q6S8J3; P0CG38	POTE ankyrin domain family member F OS=Homo sapiens OX=9606 GN=POTEF PE=1 SV=2; POTE ankyrin domain family member J OS=Homo sapiens OX=9606 GN=POTEJ PE=3 SV=1; POTE ankyrin domain family member E OS=Homo sapiens OX=9606 GN=POTEE PE=2 SV=3; POTE ankyrin domain family member I OS=Homo sapiens OX=9606 GN=POTEI PE=3 SV=1	0	3	3	0.203	0	1	1	1	972.123	972.123	2914.35	2914.36	-1.3	-0.00126	0/0	0	0	1941930	HCD	MS2	55.1802	116.298	124.004	59388	59388	59387	220621_E_201.raw	F6.1	NoneMonoisotopic	1773	3.35	2	FALSE	0.009513	0.09073	0.006
High	Sequest HT	Sequest HT (A5)	A	5	Unambiguous	DDTAVLVIDNGSGMCKAGFAGDDAPR	[D].dDTAVLVIDNGSGmckAGFAGDDAPR.[A]	4	A5A3E0; P0CG38	A5A3E0	POTE ankyrin domain family member F OS=Homo sapiens OX=9606 GN=POTEF PE=1 SV=2;POTE ankyrin domain family member I OS=Homo sapiens OX=9606 GN=POTEI PE=3 SV=1	A5A3E0; P0CG39; Q6S8J3; P0CG38	POTE ankyrin domain family member F OS=Homo sapiens OX=9606 GN=POTEF PE=1 SV=2; POTE ankyrin domain family member J OS=Homo sapiens OX=9606 GN=POTEJ PE=3 SV=1; POTE ankyrin domain family member E OS=Homo sapiens OX=9606 GN=POTEE PE=2 SV=3; POTE ankyrin domain family member I OS=Homo sapiens OX=9606 GN=POTEI PE=3 SV=1	0	3	0	0.603	0	1	1	1	972.122	972.122	2914.35	2914.36	-2.14	-0.00207	0/0	0	0	2.63812e+06	HCD	MS2	74.4679	120	129.283	61659	61659	61649	220621_E_201.raw	F6.1	NoneMonoisotopic	1730	5.29	2	FALSE	9.269e-06	3.453e-06	1.108
High	Sequest HT	Sequest HT (A5)	A	5	Selected	DDTAVLVIDNGSGMCKAGFAGDDAPR	[D].dDTAVLVIDNGSGmckAGFAGDDAPR.[A]	4	A5A3E0; P0CG38	A5A3E0	POTE ankyrin domain family member F OS=Homo sapiens OX=9606 GN=POTEF PE=1 SV=2;POTE ankyrin domain family member I OS=Homo sapiens OX=9606 GN=POTEI PE=3 SV=1	A5A3E0; P0CG39; Q6S8J3; P0CG38	POTE ankyrin domain family member F OS=Homo sapiens OX=9606 GN=POTEF PE=1 SV=2; POTE ankyrin domain family member J OS=Homo sapiens OX=9606 GN=POTEJ PE=3 SV=1; POTE ankyrin domain family member E OS=Homo sapiens OX=9606 GN=POTEE PE=2 SV=3; POTE ankyrin domain family member I OS=Homo sapiens OX=9606 GN=POTEI PE=3 SV=1	0	3	3	0.5902	0	1	1	1	972.117	972.118	2914.34	2914.36	-7.07	-0.00687	0/0	0	0	3.43552e+06	HCD	MS2	45.3208	76.093	110.924	53431	53431	53420	220621_E_204.raw	F6.4	NA	1513	4.71	2	FALSE	9.269e-06	7.413e-07	1.276
High	Sequest HT	Sequest HT (A5)	A	5	Unambiguous	DDTAVLVIDNGSGMCKAGFAGDDAPR	[D].dDTAVLVIDNGSGmckAGFAGDDAPR.[A]	4	A5A3E0; P0CG38	A5A3E0	POTE ankyrin domain family member F OS=Homo sapiens OX=9606 GN=POTEF PE=1 SV=2;POTE ankyrin domain family member I OS=Homo sapiens OX=9606 GN=POTEI PE=3 SV=1	A5A3E0; P0CG39; Q6S8J3; P0CG38	POTE ankyrin domain family member F OS=Homo sapiens OX=9606 GN=POTEF PE=1 SV=2; POTE ankyrin domain family member J OS=Homo sapiens OX=9606 GN=POTEJ PE=3 SV=1; POTE ankyrin domain family member E OS=Homo sapiens OX=9606 GN=POTEE PE=2 SV=3; POTE ankyrin domain family member I OS=Homo sapiens OX=9606 GN=POTEI PE=3 SV=1	0	3	3	0.5608	0	1	1	1	972.116	972.117	2914.33	2914.36	-7.92	-0.00769	0/0	0	0	2.01675e+06	HCD	MS2	0	65.6	111.927	53925	53925	53914	220621_E_204.raw	F6.4	NoneMonoisotopic	1478	3.78	2	FALSE	0.000111	0.0007898	0.506
High	Sequest HT	Sequest HT (A5)	A	5	Selected	DDTAVLVIDNGSGMCKAGFAGDDAPR	[D].dDTAVLVIDNGSGmckAGFAGDDAPR.[A]	4	A5A3E0; P0CG38	A5A3E0	POTE ankyrin domain family member F OS=Homo sapiens OX=9606 GN=POTEF PE=1 SV=2;POTE ankyrin domain family member I OS=Homo sapiens OX=9606 GN=POTEI PE=3 SV=1	A5A3E0; P0CG39; Q6S8J3; P0CG38	POTE ankyrin domain family member F OS=Homo sapiens OX=9606 GN=POTEF PE=1 SV=2; POTE ankyrin domain family member J OS=Homo sapiens OX=9606 GN=POTEJ PE=3 SV=1; POTE ankyrin domain family member E OS=Homo sapiens OX=9606 GN=POTEE PE=2 SV=3; POTE ankyrin domain family member I OS=Homo sapiens OX=9606 GN=POTEI PE=3 SV=1	0	3	0	0.542	0	1	1	1	972.122	972.123	2914.35	2914.36	-2.49	-0.00242	0/0	0	0	4952346	HCD	MS2	68.1402	64.546	114.899	55432	55432	55422	220621_E_204.raw	F6.4	NA	1720	3.69	2	FALSE	9.666e-05	0.0005377	0.547
High	Sequest HT	Sequest HT (A5)	A	5	Unambiguous	DDTAVLVIDNGSGMCKAGFAGDDAPR	[D].dDTAVLVIDNGSGmckAGFAGDDAPR.[A]	4	A5A3E0; P0CG38	A5A3E0	POTE ankyrin domain family member F OS=Homo sapiens OX=9606 GN=POTEF PE=1 SV=2;POTE ankyrin domain family member I OS=Homo sapiens OX=9606 GN=POTEI PE=3 SV=1	A5A3E0; P0CG39; Q6S8J3; P0CG38	POTE ankyrin domain family member F OS=Homo sapiens OX=9606 GN=POTEF PE=1 SV=2; POTE ankyrin domain family member J OS=Homo sapiens OX=9606 GN=POTEJ PE=3 SV=1; POTE ankyrin domain family member E OS=Homo sapiens OX=9606 GN=POTEE PE=2 SV=3; POTE ankyrin domain family member I OS=Homo sapiens OX=9606 GN=POTEI PE=3 SV=1	0	3	3	0.3741	0	1	1	1	972.127	972.128	2914.37	2914.36	3.35	0.00326	0/0	0	0	9668693	HCD	MS2	49.5892	10.561	114.939	55453	55453	55448	220621_E_204.raw	F6.4	NA	2034	2.94	2	FALSE	0.004035	0.03586	0.108
High	Sequest HT	Sequest HT (A5)	A	5	Unambiguous	DDTAVLVIDNGSGMCKAGFAGDDAPR	[D].dDTAVLVIDNGSGmckAGFAGDDAPR.[A]	4	A5A3E0; P0CG38	A5A3E0	POTE ankyrin domain family member F OS=Homo sapiens OX=9606 GN=POTEF PE=1 SV=2;POTE ankyrin domain family member I OS=Homo sapiens OX=9606 GN=POTEI PE=3 SV=1	A5A3E0; P0CG39; Q6S8J3; P0CG38	POTE ankyrin domain family member F OS=Homo sapiens OX=9606 GN=POTEF PE=1 SV=2; POTE ankyrin domain family member J OS=Homo sapiens OX=9606 GN=POTEJ PE=3 SV=1; POTE ankyrin domain family member E OS=Homo sapiens OX=9606 GN=POTEE PE=2 SV=3; POTE ankyrin domain family member I OS=Homo sapiens OX=9606 GN=POTEI PE=3 SV=1	0	3	3	0.5263	0	1	1	1	972.121	972.122	2914.35	2914.36	-3.41	-0.00331	0/0	0	0	1.53617e+06	HCD	MS2	53.6225	91.244	115.82	55889	55889	55877	220621_E_204.raw	F6.4	NA	1680	4.37	2	FALSE	3.982e-05	7.439e-05	0.769
High	Sequest HT	Sequest HT (A5)	A	5	Unambiguous	DDTAVLVIDNGSGMCKAGFAGDDAPR	[D].dDTAVLVIDNGSGmckAGFAGDDAPR.[A]	4	A5A3E0; P0CG38	A5A3E0	POTE ankyrin domain family member F OS=Homo sapiens OX=9606 GN=POTEF PE=1 SV=2;POTE ankyrin domain family member I OS=Homo sapiens OX=9606 GN=POTEI PE=3 SV=1	A5A3E0; P0CG39; Q6S8J3; P0CG38	POTE ankyrin domain family member F OS=Homo sapiens OX=9606 GN=POTEF PE=1 SV=2; POTE ankyrin domain family member J OS=Homo sapiens OX=9606 GN=POTEJ PE=3 SV=1; POTE ankyrin domain family member E OS=Homo sapiens OX=9606 GN=POTEE PE=2 SV=3; POTE ankyrin domain family member I OS=Homo sapiens OX=9606 GN=POTEI PE=3 SV=1	0	3	3	0.5	0	1	1	1	972.121	972.122	2914.35	2914.36	-2.66	-0.00259	0/0	0	0	1.60775e+06	HCD	MS2	61.4385	95.452	118.462	57150	57150	57138	220621_E_204.raw	F6.4	NA	1704	3.94	2	FALSE	9.269e-06	3.863e-05	0.843
High	Sequest HT	Sequest HT (A5)	A	5	Selected	DDTAVLVIDNGSGMCKAGFAGDDAPR	[D].dDTAVLVIDNGSGMckAGFAGDDAPR.[A]	4	A5A3E0; P0CG38	A5A3E0	POTE ankyrin domain family member F OS=Homo sapiens OX=9606 GN=POTEF PE=1 SV=2;POTE ankyrin domain family member I OS=Homo sapiens OX=9606 GN=POTEI PE=3 SV=1	A5A3E0; P0CG39; Q6S8J3; P0CG38	POTE ankyrin domain family member F OS=Homo sapiens OX=9606 GN=POTEF PE=1 SV=2; POTE ankyrin domain family member J OS=Homo sapiens OX=9606 GN=POTEJ PE=3 SV=1; POTE ankyrin domain family member E OS=Homo sapiens OX=9606 GN=POTEE PE=2 SV=3; POTE ankyrin domain family member I OS=Homo sapiens OX=9606 GN=POTEI PE=3 SV=1	0	2	0	0.6759	0	1	1	1	1449.68	1449.68	2898.35	2898.36	-4.88	-0.00707	0/0	0	0	65358768	HCD	MS2	62.3463	9.001	119.529	57638	57638	57632	220621_E_204.raw	F6.4	NA	1868	4.69	2	FALSE	9.269e-06	4.205e-08	1.588
High	Sequest HT	Sequest HT (A5)	A	5	Selected	DDTAVLVIDNGSGMCKAGFAGDDAPR	[D].dDTAVLVIDNGSGMckAGFAGDDAPR.[A]	4	A5A3E0; P0CG38	A5A3E0	POTE ankyrin domain family member F OS=Homo sapiens OX=9606 GN=POTEF PE=1 SV=2;POTE ankyrin domain family member I OS=Homo sapiens OX=9606 GN=POTEI PE=3 SV=1	A5A3E0; P0CG39; Q6S8J3; P0CG38	POTE ankyrin domain family member F OS=Homo sapiens OX=9606 GN=POTEF PE=1 SV=2; POTE ankyrin domain family member J OS=Homo sapiens OX=9606 GN=POTEJ PE=3 SV=1; POTE ankyrin domain family member E OS=Homo sapiens OX=9606 GN=POTEE PE=2 SV=3; POTE ankyrin domain family member I OS=Homo sapiens OX=9606 GN=POTEI PE=3 SV=1	0	2	0	0.7149	0	1	1	1	1449.68	1449.68	2898.35	2898.36	-5.12	-0.00742	0/0	0	0	137833072	HCD	MS2	64.3769	2.44	119.678	57712	57712	57710	220621_E_204.raw	F6.4	NA	1854	4.91	2	FALSE	9.269e-06	8.781e-08	1.508
High	Sequest HT	Sequest HT (A5)	A	5	Selected	DDTAVLVIDNGSGMCKAGFAGDDAPR	[D].dDTAVLVIDNGSGmckAGFAGDDAPR.[A]	4	A5A3E0; P0CG38	A5A3E0	POTE ankyrin domain family member F OS=Homo sapiens OX=9606 GN=POTEF PE=1 SV=2;POTE ankyrin domain family member I OS=Homo sapiens OX=9606 GN=POTEI PE=3 SV=1	A5A3E0; P0CG39; Q6S8J3; P0CG38	POTE ankyrin domain family member F OS=Homo sapiens OX=9606 GN=POTEF PE=1 SV=2; POTE ankyrin domain family member J OS=Homo sapiens OX=9606 GN=POTEJ PE=3 SV=1; POTE ankyrin domain family member E OS=Homo sapiens OX=9606 GN=POTEE PE=2 SV=3; POTE ankyrin domain family member I OS=Homo sapiens OX=9606 GN=POTEI PE=3 SV=1	0	3	3	0.4554	0	1	1	1	972.125	972.126	2914.36	2914.36	0.8	0.00078	0/0	0	0	7.66072e+06	HCD	MS2	16.9761	15.023	120.062	57893	57893	57892	220621_E_204.raw	F6.4	NA	1885	3.14	2	FALSE	0.0006878	0.005995	0.301
High	Sequest HT	Sequest HT (A5)	A	5	Selected	DDTAVLVIDNGSGMCKAGFAGDDAPR	[D].dDTAVLVIDNGSGmckAGFAGDDAPR.[A]	4	A5A3E0; P0CG38	A5A3E0	POTE ankyrin domain family member F OS=Homo sapiens OX=9606 GN=POTEF PE=1 SV=2;POTE ankyrin domain family member I OS=Homo sapiens OX=9606 GN=POTEI PE=3 SV=1	A5A3E0; P0CG39; Q6S8J3; P0CG38	POTE ankyrin domain family member F OS=Homo sapiens OX=9606 GN=POTEF PE=1 SV=2; POTE ankyrin domain family member J OS=Homo sapiens OX=9606 GN=POTEJ PE=3 SV=1; POTE ankyrin domain family member E OS=Homo sapiens OX=9606 GN=POTEE PE=2 SV=3; POTE ankyrin domain family member I OS=Homo sapiens OX=9606 GN=POTEI PE=3 SV=1	0	3	3	0.4036	0	1	1	1	972.129	972.13	2914.37	2914.36	4.98	0.00484	0/0	0	0	6.57925e+06	HCD	MS2	48.3186	47.953	120.595	58118	58118	58113	220621_E_204.raw	F6.4	NA	2121	3.37	2	FALSE	0.003433	0.03046	0.126
High	Sequest HT	Sequest HT (A5)	A	5	Selected	DDTAVLVIDNGSGMCKAGFAGDDAPR	[D].dDTAVLVIDNGSGmckAGFAGDDAPR.[A]	4	A5A3E0; P0CG38	A5A3E0	POTE ankyrin domain family member F OS=Homo sapiens OX=9606 GN=POTEF PE=1 SV=2;POTE ankyrin domain family member I OS=Homo sapiens OX=9606 GN=POTEI PE=3 SV=1	A5A3E0; P0CG39; Q6S8J3; P0CG38	POTE ankyrin domain family member F OS=Homo sapiens OX=9606 GN=POTEF PE=1 SV=2; POTE ankyrin domain family member J OS=Homo sapiens OX=9606 GN=POTEJ PE=3 SV=1; POTE ankyrin domain family member E OS=Homo sapiens OX=9606 GN=POTEE PE=2 SV=3; POTE ankyrin domain family member I OS=Homo sapiens OX=9606 GN=POTEI PE=3 SV=1	0	3	3	0.4257	0	1	1	1	972.124	972.125	2914.36	2914.36	0.24	0.00023	0/0	0	0	7.64244e+06	HCD	MS2	17.8515	15.915	120.982	58284	58284	58282	220621_E_204.raw	F6.4	NA	1855	3.03	2	FALSE	0.003069	0.02698	0.14
High	Sequest HT	Sequest HT (A5)	A	5	Selected	DDTAVLVIDNGSGMCKAGFAGDDAPR	[D].dDTAVLVIDNGSGmckAGFAGDDAPR.[A]	4	A5A3E0; P0CG38	A5A3E0	POTE ankyrin domain family member F OS=Homo sapiens OX=9606 GN=POTEF PE=1 SV=2;POTE ankyrin domain family member I OS=Homo sapiens OX=9606 GN=POTEI PE=3 SV=1	A5A3E0; P0CG39; Q6S8J3; P0CG38	POTE ankyrin domain family member F OS=Homo sapiens OX=9606 GN=POTEF PE=1 SV=2; POTE ankyrin domain family member J OS=Homo sapiens OX=9606 GN=POTEJ PE=3 SV=1; POTE ankyrin domain family member E OS=Homo sapiens OX=9606 GN=POTEE PE=2 SV=3; POTE ankyrin domain family member I OS=Homo sapiens OX=9606 GN=POTEI PE=3 SV=1	0	3	3	0.3357	0	1	1	1	972.127	972.128	2914.37	2914.36	3.01	0.00292	0/0	0	0	17334692	HCD	MS2	62.1418	9.878	121.119	58349	58349	58347	220621_E_204.raw	F6.4	NA	2014	2.8	2	FALSE	0.003566	0.03143	0.122
High	Sequest HT	Sequest HT (A5)	A	5	Selected	DDTAVLVIDNGSGMCKAGFAGDDAPR	[D].dDTAVLVIDNGSGmckAGFAGDDAPR.[A]	4	A5A3E0; P0CG38	A5A3E0	POTE ankyrin domain family member F OS=Homo sapiens OX=9606 GN=POTEF PE=1 SV=2;POTE ankyrin domain family member I OS=Homo sapiens OX=9606 GN=POTEI PE=3 SV=1	A5A3E0; P0CG39; Q6S8J3; P0CG38	POTE ankyrin domain family member F OS=Homo sapiens OX=9606 GN=POTEF PE=1 SV=2; POTE ankyrin domain family member J OS=Homo sapiens OX=9606 GN=POTEJ PE=3 SV=1; POTE ankyrin domain family member E OS=Homo sapiens OX=9606 GN=POTEE PE=2 SV=3; POTE ankyrin domain family member I OS=Homo sapiens OX=9606 GN=POTEI PE=3 SV=1	0	3	3	0.3435	0	1	1	1	972.127	972.128	2914.37	2914.36	3.01	0.00292	0/0	0	0	17334692	HCD	MS2	42.1367	18.987	121.121	58351	58351	58347	220621_E_204.raw	F6.4	NA	2014	3.29	2	FALSE	0.004323	0.0388	0.099
High	Sequest HT	Sequest HT (A5)	A	5	Selected	DDTAVLVIDNGSGMCKAGFAGDDAPR	[D].dDTAVLVIDNGSGmckAGFAGDDAPR.[A]	4	A5A3E0; P0CG38	A5A3E0	POTE ankyrin domain family member F OS=Homo sapiens OX=9606 GN=POTEF PE=1 SV=2;POTE ankyrin domain family member I OS=Homo sapiens OX=9606 GN=POTEI PE=3 SV=1	A5A3E0; P0CG39; Q6S8J3; P0CG38	POTE ankyrin domain family member F OS=Homo sapiens OX=9606 GN=POTEF PE=1 SV=2; POTE ankyrin domain family member J OS=Homo sapiens OX=9606 GN=POTEJ PE=3 SV=1; POTE ankyrin domain family member E OS=Homo sapiens OX=9606 GN=POTEE PE=2 SV=3; POTE ankyrin domain family member I OS=Homo sapiens OX=9606 GN=POTEI PE=3 SV=1	0	3	3	0.3666	0	1	1	1	972.128	972.129	2914.37	2914.36	3.86	0.00375	0/0	0	0	2.68709e+06	HCD	MS2	25.6856	94.017	121.531	58547	58547	58542	220621_E_204.raw	F6.4	NA	2073	3.11	2	FALSE	0.005195	0.04888	0.074
High	Sequest HT	Sequest HT (A5)	A	5	Unambiguous	DDTAVLVIDNGSGMCKAGFAGDDAPR	[D].dDTAVLVIDNGSGmckAGFAGDDAPR.[A]	4	A5A3E0; P0CG38	A5A3E0	POTE ankyrin domain family member F OS=Homo sapiens OX=9606 GN=POTEF PE=1 SV=2;POTE ankyrin domain family member I OS=Homo sapiens OX=9606 GN=POTEI PE=3 SV=1	A5A3E0; P0CG39; Q6S8J3; P0CG38	POTE ankyrin domain family member F OS=Homo sapiens OX=9606 GN=POTEF PE=1 SV=2; POTE ankyrin domain family member J OS=Homo sapiens OX=9606 GN=POTEJ PE=3 SV=1; POTE ankyrin domain family member E OS=Homo sapiens OX=9606 GN=POTEE PE=2 SV=3; POTE ankyrin domain family member I OS=Homo sapiens OX=9606 GN=POTEI PE=3 SV=1	0	3	3	0.3496	0	1	1	1	972.122	972.123	2914.35	2914.36	-1.94	-0.00189	0/0	0	0	1.94026e+06	HCD	MS2	57.3001	107.35	122.048	58785	58785	58776	220621_E_204.raw	F6.4	NA	1733	2.66	2	FALSE	0.003856	0.03404	0.113
High	Sequest HT	Sequest HT (A5)	A	5	Selected	DDTAVLVIDNGSGMCKAGFAGDDAPR	[D].dDTAVLVIDNGSGMckAGFAGDDAPR.[A]	4	A5A3E0; P0CG38	A5A3E0	POTE ankyrin domain family member F OS=Homo sapiens OX=9606 GN=POTEF PE=1 SV=2;POTE ankyrin domain family member I OS=Homo sapiens OX=9606 GN=POTEI PE=3 SV=1	A5A3E0; P0CG39; Q6S8J3; P0CG38	POTE ankyrin domain family member F OS=Homo sapiens OX=9606 GN=POTEF PE=1 SV=2; POTE ankyrin domain family member J OS=Homo sapiens OX=9606 GN=POTEJ PE=3 SV=1; POTE ankyrin domain family member E OS=Homo sapiens OX=9606 GN=POTEE PE=2 SV=3; POTE ankyrin domain family member I OS=Homo sapiens OX=9606 GN=POTEI PE=3 SV=1	0	3	3	0.6096	0	1	1	1	966.785	966.785	2898.34	2898.36	-7.85	-0.00758	0/0	0	0	1402315	HCD	MS2	55.7507	120	127.223	61050	61050	61038	220621_E_204.raw	F6.4	NA	1698	4.15	2	FALSE	9.269e-06	1.824e-05	0.926
High	Sequest HT	Sequest HT (A5)	A	5	Unambiguous	DDTAVLVIDNGSGMCKAGFAGDDAPR	[D].dDTAVLVIDNGSGmckAGFAGDDAPR.[A]	4	A5A3E0; P0CG38	A5A3E0	POTE ankyrin domain family member F OS=Homo sapiens OX=9606 GN=POTEF PE=1 SV=2;POTE ankyrin domain family member I OS=Homo sapiens OX=9606 GN=POTEI PE=3 SV=1	A5A3E0; P0CG39; Q6S8J3; P0CG38	POTE ankyrin domain family member F OS=Homo sapiens OX=9606 GN=POTEF PE=1 SV=2; POTE ankyrin domain family member J OS=Homo sapiens OX=9606 GN=POTEJ PE=3 SV=1; POTE ankyrin domain family member E OS=Homo sapiens OX=9606 GN=POTEE PE=2 SV=3; POTE ankyrin domain family member I OS=Homo sapiens OX=9606 GN=POTEI PE=3 SV=1	0	3	0	0.5962	0	1	1	1	972.121	972.121	2914.35	2914.36	-2.94	-0.00286	0/0	0	0	2.77547e+06	HCD	MS2	48.175	92.511	128.723	61686	61686	61675	220621_E_204.raw	F6.4	NA	1688	4.26	2	FALSE	9.516e-05	0.0005235	0.55
High	Sequest HT	Sequest HT (A5)	A	5	Selected	DDTAVLVIDNGSGMCKAGFAGDDAPR	[D].dDTAVLVIDNGSGmckAGFAGDDAPR.[A]	4	A5A3E0; P0CG38	A5A3E0	POTE ankyrin domain family member F OS=Homo sapiens OX=9606 GN=POTEF PE=1 SV=2;POTE ankyrin domain family member I OS=Homo sapiens OX=9606 GN=POTEI PE=3 SV=1	A5A3E0; P0CG39; Q6S8J3; P0CG38	POTE ankyrin domain family member F OS=Homo sapiens OX=9606 GN=POTEF PE=1 SV=2; POTE ankyrin domain family member J OS=Homo sapiens OX=9606 GN=POTEJ PE=3 SV=1; POTE ankyrin domain family member E OS=Homo sapiens OX=9606 GN=POTEE PE=2 SV=3; POTE ankyrin domain family member I OS=Homo sapiens OX=9606 GN=POTEI PE=3 SV=1	0	3	3	0.4431	0	1	1	1	972.125	972.124	2914.36	2914.36	0.88	0.00085	0/0	0	0	2.6534e+06	HCD	MS2	72.6389	120	121.173	58356	58356	58347	220621_E_205.raw	F6.5	NA	1888	3.43	2	FALSE	7.925e-05	0.0004366	0.569
High	Sequest HT	Sequest HT (A5)	A	5	Unambiguous	DDTAVLVIDNGSGMCKAGFAGDDAPR	[D].dDTAVLVIDNGSGMckAGFAGDDAPR.[A]	4	A5A3E0; P0CG38	A5A3E0	POTE ankyrin domain family member F OS=Homo sapiens OX=9606 GN=POTEF PE=1 SV=2;POTE ankyrin domain family member I OS=Homo sapiens OX=9606 GN=POTEI PE=3 SV=1	A5A3E0; P0CG39; Q6S8J3; P0CG38	POTE ankyrin domain family member F OS=Homo sapiens OX=9606 GN=POTEF PE=1 SV=2; POTE ankyrin domain family member J OS=Homo sapiens OX=9606 GN=POTEJ PE=3 SV=1; POTE ankyrin domain family member E OS=Homo sapiens OX=9606 GN=POTEE PE=2 SV=3; POTE ankyrin domain family member I OS=Homo sapiens OX=9606 GN=POTEI PE=3 SV=1	0	3	0	0.6275	0	1	1	1	966.787	966.786	2898.35	2898.36	-5.58	-0.00539	0/0	0	0	3.76621e+06	HCD	MS2	77.3202	103.996	121.45	58473	58473	58464	220621_E_205.raw	F6.5	NoneMonoisotopic	1816	5.02	2	FALSE	9.269e-06	5.084e-05	0.812
High	Sequest HT	Sequest HT (A5)	A	5	Unambiguous	DDTAVLVIDNGSGMCKAGFAGDDAPR	[D].dDTAVLVIDNGSGMckAGFAGDDAPR.[A]	4	A5A3E0; P0CG38	A5A3E0	POTE ankyrin domain family member F OS=Homo sapiens OX=9606 GN=POTEF PE=1 SV=2;POTE ankyrin domain family member I OS=Homo sapiens OX=9606 GN=POTEI PE=3 SV=1	A5A3E0; P0CG39; Q6S8J3; P0CG38	POTE ankyrin domain family member F OS=Homo sapiens OX=9606 GN=POTEF PE=1 SV=2; POTE ankyrin domain family member J OS=Homo sapiens OX=9606 GN=POTEJ PE=3 SV=1; POTE ankyrin domain family member E OS=Homo sapiens OX=9606 GN=POTEE PE=2 SV=3; POTE ankyrin domain family member I OS=Homo sapiens OX=9606 GN=POTEI PE=3 SV=1	0	3	3	0.6614	0	1	1	1	966.784	966.783	2898.34	2898.36	-8.94	-0.00864	0/0	0	0	5.38343e+06	HCD	MS2	8.92455	51.861	122.331	58894	58894	58893	220621_E_205.raw	F6.5	NA	1642	4.43	2	FALSE	7.925e-05	0.0003761	0.586
High	Sequest HT	Sequest HT (A5)	A	5	Unambiguous	DDTAVLVIDNGSGMCKAGFAGDDAPR	[D].dDTAVLVIDNGSGMckAGFAGDDAPR.[A]	4	A5A3E0; P0CG38	A5A3E0	POTE ankyrin domain family member F OS=Homo sapiens OX=9606 GN=POTEF PE=1 SV=2;POTE ankyrin domain family member I OS=Homo sapiens OX=9606 GN=POTEI PE=3 SV=1	A5A3E0; P0CG39; Q6S8J3; P0CG38	POTE ankyrin domain family member F OS=Homo sapiens OX=9606 GN=POTEF PE=1 SV=2; POTE ankyrin domain family member J OS=Homo sapiens OX=9606 GN=POTEJ PE=3 SV=1; POTE ankyrin domain family member E OS=Homo sapiens OX=9606 GN=POTEE PE=2 SV=3; POTE ankyrin domain family member I OS=Homo sapiens OX=9606 GN=POTEI PE=3 SV=1	0	3	0	0.6168	0	1	1	1	966.787	966.788	2898.35	2898.36	-5.27	-0.00509	0/0	0	0	3.26446e+06	HCD	MS2	61.6355	106.566	119.899	57815	57815	57814	220621_E_206.raw	F6.6	NoneMonoisotopic	1830	5.48	2	FALSE	3.982e-05	9.214e-05	0.745
High	Sequest HT	Sequest HT (A5)	A	5	Selected	DDTAVLVIDNGSGMCKAGFAGDDAPR	[D].dDTAVLVIDNGSGMckAGFAGDDAPR.[A]	4	A5A3E0; P0CG38	A5A3E0	POTE ankyrin domain family member F OS=Homo sapiens OX=9606 GN=POTEF PE=1 SV=2;POTE ankyrin domain family member I OS=Homo sapiens OX=9606 GN=POTEI PE=3 SV=1	A5A3E0; P0CG39; Q6S8J3; P0CG38	POTE ankyrin domain family member F OS=Homo sapiens OX=9606 GN=POTEF PE=1 SV=2; POTE ankyrin domain family member J OS=Homo sapiens OX=9606 GN=POTEJ PE=3 SV=1; POTE ankyrin domain family member E OS=Homo sapiens OX=9606 GN=POTEE PE=2 SV=3; POTE ankyrin domain family member I OS=Homo sapiens OX=9606 GN=POTEI PE=3 SV=1	0	3	0	0.5012	0	1	1	1	966.791	966.791	2898.36	2898.36	-1.86	-0.00179	0/0	0	0	4018462	HCD	MS2	86.2665	81.365	120.46	58086	58086	58074	220621_E_206.raw	F6.6	NoneMonoisotopic	1999	4.27	2	FALSE	3.982e-05	7.631e-05	0.766
High	Sequest HT	Sequest HT (A5)	A	5	Selected	DDTAVLVIDNGSGMCKAGFAGDDAPR	[D].dDTAVLVIDNGSGmckAGFAGDDAPR.[A]	4	A5A3E0; P0CG38	A5A3E0	POTE ankyrin domain family member F OS=Homo sapiens OX=9606 GN=POTEF PE=1 SV=2;POTE ankyrin domain family member I OS=Homo sapiens OX=9606 GN=POTEI PE=3 SV=1	A5A3E0; P0CG39; Q6S8J3; P0CG38	POTE ankyrin domain family member F OS=Homo sapiens OX=9606 GN=POTEF PE=1 SV=2; POTE ankyrin domain family member J OS=Homo sapiens OX=9606 GN=POTEJ PE=3 SV=1; POTE ankyrin domain family member E OS=Homo sapiens OX=9606 GN=POTEE PE=2 SV=3; POTE ankyrin domain family member I OS=Homo sapiens OX=9606 GN=POTEI PE=3 SV=1	0	3	0	0.4508	0	1	1	1	972.121	972.121	2914.35	2914.36	-3.02	-0.00293	0/0	0	0	3.52828e+06	HCD	MS2	83.4528	44.861	122.016	58783	58783	58776	220621_E_206.raw	F6.6	NoneMonoisotopic	1701	3.15	2	FALSE	0.001907	0.01697	0.192
High	Sequest HT	Sequest HT (A5)	A	5	Unambiguous	DDTAVLVIDNGSGMCKAGFAGDDAPR	[D].dDTAVLVIDNGSGmckAGFAGDDAPR.[A]	4	A5A3E0; P0CG38	A5A3E0	POTE ankyrin domain family member F OS=Homo sapiens OX=9606 GN=POTEF PE=1 SV=2;POTE ankyrin domain family member I OS=Homo sapiens OX=9606 GN=POTEI PE=3 SV=1	A5A3E0; P0CG39; Q6S8J3; P0CG38	POTE ankyrin domain family member F OS=Homo sapiens OX=9606 GN=POTEF PE=1 SV=2; POTE ankyrin domain family member J OS=Homo sapiens OX=9606 GN=POTEJ PE=3 SV=1; POTE ankyrin domain family member E OS=Homo sapiens OX=9606 GN=POTEE PE=2 SV=3; POTE ankyrin domain family member I OS=Homo sapiens OX=9606 GN=POTEI PE=3 SV=1	0	3	3	0.5049	0	1	1	1	972.121	972.121	2914.35	2914.36	-3.36	-0.00326	0/0	0	0	3489663	HCD	MS2	57.5507	70.228	114.064	53575	53575	53563	220621_E_207.raw	F6.7	NoneMonoisotopic	1682	3.05	2	FALSE	0.002159	0.01859	0.182
High	Sequest HT	Sequest HT (A5)	A	5	Selected	DDTAVLVIDNGSGMCKAGFAGDDAPR	[D].dDTAVLVIDNGSGmckAGFAGDDAPR.[A]	4	A5A3E0; P0CG38	A5A3E0	POTE ankyrin domain family member F OS=Homo sapiens OX=9606 GN=POTEF PE=1 SV=2;POTE ankyrin domain family member I OS=Homo sapiens OX=9606 GN=POTEI PE=3 SV=1	A5A3E0; P0CG39; Q6S8J3; P0CG38	POTE ankyrin domain family member F OS=Homo sapiens OX=9606 GN=POTEF PE=1 SV=2; POTE ankyrin domain family member J OS=Homo sapiens OX=9606 GN=POTEJ PE=3 SV=1; POTE ankyrin domain family member E OS=Homo sapiens OX=9606 GN=POTEE PE=2 SV=3; POTE ankyrin domain family member I OS=Homo sapiens OX=9606 GN=POTEI PE=3 SV=1	0	3	0	0.2285	0	1	1	1	972.122	972.122	2914.35	2914.36	-1.92	-0.00186	0/0	0	0	4609732	HCD	MS2	76.8998	77.529	122.524	57548	57548	57541	220621_E_207.raw	F6.7	NA	1733	2.67	2	FALSE	0.001985	0.01753	0.188
High	Sequest HT	Sequest HT (A5)	A	5	Selected	DDTAVLVIDNGSGMCKAGFAGDDAPR	[D].dDTAVLVIDNGSGmckAGFAGDDAPR.[A]	4	A5A3E0; P0CG38	A5A3E0	POTE ankyrin domain family member F OS=Homo sapiens OX=9606 GN=POTEF PE=1 SV=2;POTE ankyrin domain family member I OS=Homo sapiens OX=9606 GN=POTEI PE=3 SV=1	A5A3E0; P0CG39; Q6S8J3; P0CG38	POTE ankyrin domain family member F OS=Homo sapiens OX=9606 GN=POTEF PE=1 SV=2; POTE ankyrin domain family member J OS=Homo sapiens OX=9606 GN=POTEJ PE=3 SV=1; POTE ankyrin domain family member E OS=Homo sapiens OX=9606 GN=POTEE PE=2 SV=3; POTE ankyrin domain family member I OS=Homo sapiens OX=9606 GN=POTEI PE=3 SV=1	0	3	0	0.3833	0	1	1	1	972.118	972.118	2914.34	2914.36	-6.6	-0.00641	0/0	0	0	1.90537e+06	HCD	MS2	82.8689	120	128.076	59981	59981	59972	220621_E_207.raw	F6.7	NoneMonoisotopic	1523	3.47	2	FALSE	0.004583	0.04161	0.091
High	Sequest HT	Sequest HT (A5)	A	5	Selected	DDTAVLVIDNGSGMCKAGFAGDDAPR	[D].dDTAVLVIDNGSGMckAGFAGDDAPR.[A]	4	A5A3E0; P0CG38	A5A3E0	POTE ankyrin domain family member F OS=Homo sapiens OX=9606 GN=POTEF PE=1 SV=2;POTE ankyrin domain family member I OS=Homo sapiens OX=9606 GN=POTEI PE=3 SV=1	A5A3E0; P0CG39; Q6S8J3; P0CG38	POTE ankyrin domain family member F OS=Homo sapiens OX=9606 GN=POTEF PE=1 SV=2; POTE ankyrin domain family member J OS=Homo sapiens OX=9606 GN=POTEJ PE=3 SV=1; POTE ankyrin domain family member E OS=Homo sapiens OX=9606 GN=POTEE PE=2 SV=3; POTE ankyrin domain family member I OS=Homo sapiens OX=9606 GN=POTEI PE=3 SV=1	0	3	3	0.4954	0	1	1	1	966.791	966.792	2898.36	2898.36	-1.14	-0.0011	0/0	0	0	1.54303e+06	HCD	MS2	67.4749	106.918	129.888	60741	60741	60739	220621_E_207.raw	F6.7	NoneMonoisotopic	2045	4.32	2	FALSE	3.982e-05	0.0002041	0.654
High	Sequest HT	Sequest HT (A5)	A	5	Selected	DDTAVLVIDNGSGMCKAGFAGDDAPR	[D].dDTAVLVIDNGSGmckAGFAGDDAPR.[A]	4	A5A3E0; P0CG38	A5A3E0	POTE ankyrin domain family member F OS=Homo sapiens OX=9606 GN=POTEF PE=1 SV=2;POTE ankyrin domain family member I OS=Homo sapiens OX=9606 GN=POTEI PE=3 SV=1	A5A3E0; P0CG39; Q6S8J3; P0CG38	POTE ankyrin domain family member F OS=Homo sapiens OX=9606 GN=POTEF PE=1 SV=2; POTE ankyrin domain family member J OS=Homo sapiens OX=9606 GN=POTEJ PE=3 SV=1; POTE ankyrin domain family member E OS=Homo sapiens OX=9606 GN=POTEE PE=2 SV=3; POTE ankyrin domain family member I OS=Homo sapiens OX=9606 GN=POTEI PE=3 SV=1	0	3	0	0.3668	0	1	1	1	972.12	972.119	2914.35	2914.36	-4.07	-0.00396	0/0	0	0	2.30863e+06	HCD	MS2	76.3286	120	129.265	60059	60059	60050	220621_E_208.raw	F6.8	NoneMonoisotopic	1651	3.19	2	FALSE	0.001391	0.01244	0.226
High	Sequest HT	Sequest HT (A5)	A	5	Selected	DDTAVLVIDNGSGMCKAGFAGDDAPR	[D].dDTAVLVIDNGSGmckAGFAGDDAPR.[A]	4	A5A3E0; P0CG38	A5A3E0	POTE ankyrin domain family member F OS=Homo sapiens OX=9606 GN=POTEF PE=1 SV=2;POTE ankyrin domain family member I OS=Homo sapiens OX=9606 GN=POTEI PE=3 SV=1	A5A3E0; P0CG39; Q6S8J3; P0CG38	POTE ankyrin domain family member F OS=Homo sapiens OX=9606 GN=POTEF PE=1 SV=2; POTE ankyrin domain family member J OS=Homo sapiens OX=9606 GN=POTEJ PE=3 SV=1; POTE ankyrin domain family member E OS=Homo sapiens OX=9606 GN=POTEE PE=2 SV=3; POTE ankyrin domain family member I OS=Homo sapiens OX=9606 GN=POTEI PE=3 SV=1	0	3	3	0.6014	0	1	1	1	972.117	972.116	2914.34	2914.36	-7.4	-0.00719	0/0	0	0	1.18884e+06	HCD	MS2	36.7066	120	114.899	53581	53581	53576	220621_E_209.raw	F6.9	NA	1497	4.24	2	FALSE	0.0008582	0.007617	0.277
High	Sequest HT	Sequest HT (A5)	A	5	Unambiguous	DDTAVLVIDNGSGMCKAGFAGDDAPR	[D].dDTAVLVIDNGSGmckAGFAGDDAPR.[A]	4	A5A3E0; P0CG38	A5A3E0	POTE ankyrin domain family member F OS=Homo sapiens OX=9606 GN=POTEF PE=1 SV=2;POTE ankyrin domain family member I OS=Homo sapiens OX=9606 GN=POTEI PE=3 SV=1	A5A3E0; P0CG39; Q6S8J3; P0CG38	POTE ankyrin domain family member F OS=Homo sapiens OX=9606 GN=POTEF PE=1 SV=2; POTE ankyrin domain family member J OS=Homo sapiens OX=9606 GN=POTEJ PE=3 SV=1; POTE ankyrin domain family member E OS=Homo sapiens OX=9606 GN=POTEE PE=2 SV=3; POTE ankyrin domain family member I OS=Homo sapiens OX=9606 GN=POTEI PE=3 SV=1	0	3	3	0.6048	0	1	1	1	972.116	972.116	2914.33	2914.36	-8.39	-0.00815	0/0	0	0	4232445	HCD	MS2	39.9132	68.863	116.709	53605	53605	53602	220621_E_210.raw	F6.10	NA	1471	4.58	2	FALSE	9.666e-05	0.0006397	0.528
High	Sequest HT	Sequest HT (A5)	A	5	Unambiguous	DDTAVLVIDNGSGMCKAGFAGDDAPR	[D].dDTAVLVIDNGSGmckAGFAGDDAPR.[A]	4	A5A3E0; P0CG38	A5A3E0	POTE ankyrin domain family member F OS=Homo sapiens OX=9606 GN=POTEF PE=1 SV=2;POTE ankyrin domain family member I OS=Homo sapiens OX=9606 GN=POTEI PE=3 SV=1	A5A3E0; P0CG39; Q6S8J3; P0CG38	POTE ankyrin domain family member F OS=Homo sapiens OX=9606 GN=POTEF PE=1 SV=2; POTE ankyrin domain family member J OS=Homo sapiens OX=9606 GN=POTEJ PE=3 SV=1; POTE ankyrin domain family member E OS=Homo sapiens OX=9606 GN=POTEE PE=2 SV=3; POTE ankyrin domain family member I OS=Homo sapiens OX=9606 GN=POTEI PE=3 SV=1	0	2	2	0.6453	0	1	1	1	1457.67	1457.67	2914.34	2914.36	-7	-0.0102	0/0	0	0	1.32542e+06	HCD	MS2	13.3454	120	117.029	53748	53748	53745	220621_E_210.raw	F6.10	NA	1511	3.75	2	FALSE	0.0004341	0.004101	0.338
High	Sequest HT	Sequest HT (A5)	A	5	Selected	DDTAVLVIDNGSGMCKAGFAGDDAPR	[D].dDTAVLVIDNGSGMckAGFAGDDAPR.[A]	4	A5A3E0; P0CG38	A5A3E0	POTE ankyrin domain family member F OS=Homo sapiens OX=9606 GN=POTEF PE=1 SV=2;POTE ankyrin domain family member I OS=Homo sapiens OX=9606 GN=POTEI PE=3 SV=1	A5A3E0; P0CG39; Q6S8J3; P0CG38	POTE ankyrin domain family member F OS=Homo sapiens OX=9606 GN=POTEF PE=1 SV=2; POTE ankyrin domain family member J OS=Homo sapiens OX=9606 GN=POTEJ PE=3 SV=1; POTE ankyrin domain family member E OS=Homo sapiens OX=9606 GN=POTEE PE=2 SV=3; POTE ankyrin domain family member I OS=Homo sapiens OX=9606 GN=POTEI PE=3 SV=1	0	3	0	0.5692	0	1	1	1	966.791	966.79	2898.36	2898.36	-1.93	-0.00187	0/0	0	0	2139526	HCD	MS2	63.7345	120	121.528	55783	55783	55773	220621_E_210.raw	F6.10	NoneMonoisotopic	1996	5.13	2	FALSE	9.269e-06	7.183e-07	1.279
High	Sequest HT	Sequest HT (A5)	A	5	Unambiguous	DDTAVLVIDNGSGMCKAGFAGDDAPR	[D].dDTAVLVIDNGSGMckAGFAGDDAPR.[A]	4	A5A3E0; P0CG38	A5A3E0	POTE ankyrin domain family member F OS=Homo sapiens OX=9606 GN=POTEF PE=1 SV=2;POTE ankyrin domain family member I OS=Homo sapiens OX=9606 GN=POTEI PE=3 SV=1	A5A3E0; P0CG39; Q6S8J3; P0CG38	POTE ankyrin domain family member F OS=Homo sapiens OX=9606 GN=POTEF PE=1 SV=2; POTE ankyrin domain family member J OS=Homo sapiens OX=9606 GN=POTEJ PE=3 SV=1; POTE ankyrin domain family member E OS=Homo sapiens OX=9606 GN=POTEE PE=2 SV=3; POTE ankyrin domain family member I OS=Homo sapiens OX=9606 GN=POTEI PE=3 SV=1	0	3	0	0.6094	0	1	1	1	966.792	966.791	2898.36	2898.36	-0.65	-0.00063	0/0	0	0	5.0608e+06	HCD	MS2	80.7167	76.17	127.291	58250	58250	58243	220621_E_210.raw	F6.10	NA	2066	5.53	2	FALSE	9.269e-06	1.211e-05	0.971
High	Sequest HT	Sequest HT (A5)	A	5	Selected	DDTAVLVIDNGSGMCKAGFAGDDAPR	[D].dDTAVLVIDNGSGmckAGFAGDDAPR.[A]	4	A5A3E0; P0CG38	A5A3E0	POTE ankyrin domain family member F OS=Homo sapiens OX=9606 GN=POTEF PE=1 SV=2;POTE ankyrin domain family member I OS=Homo sapiens OX=9606 GN=POTEI PE=3 SV=1	A5A3E0; P0CG39; Q6S8J3; P0CG38	POTE ankyrin domain family member F OS=Homo sapiens OX=9606 GN=POTEF PE=1 SV=2; POTE ankyrin domain family member J OS=Homo sapiens OX=9606 GN=POTEJ PE=3 SV=1; POTE ankyrin domain family member E OS=Homo sapiens OX=9606 GN=POTEE PE=2 SV=3; POTE ankyrin domain family member I OS=Homo sapiens OX=9606 GN=POTEI PE=3 SV=1	0	3	0	0.5632	0	1	1	1	972.116	972.117	2914.33	2914.36	-8.05	-0.00782	0/0	0	0	3.9471e+06	HCD	MS2	58.7246	60.89	124.415	58351	58351	58347	220621_E_211.raw	F6.11	NA	1476	4.35	2	FALSE	0.0007483	0.006539	0.292
High	Sequest HT	Sequest HT (A5)	A	5	Selected	DDTAVLVIDNGSGMCKAGFAGDDAPR	[D].dDTAVLVIDNGSGmckAGFAGDDAPR.[A]	4	A5A3E0; P0CG38	A5A3E0	POTE ankyrin domain family member F OS=Homo sapiens OX=9606 GN=POTEF PE=1 SV=2;POTE ankyrin domain family member I OS=Homo sapiens OX=9606 GN=POTEI PE=3 SV=1	A5A3E0; P0CG39; Q6S8J3; P0CG38	POTE ankyrin domain family member F OS=Homo sapiens OX=9606 GN=POTEF PE=1 SV=2; POTE ankyrin domain family member J OS=Homo sapiens OX=9606 GN=POTEJ PE=3 SV=1; POTE ankyrin domain family member E OS=Homo sapiens OX=9606 GN=POTEE PE=2 SV=3; POTE ankyrin domain family member I OS=Homo sapiens OX=9606 GN=POTEI PE=3 SV=1	0	3	3	0.4477	0	1	1	1	972.13	972.13	2914.37	2914.36	5.95	0.00578	0/0	0	0	909399	HCD	MS2	41.7039	109.435	113.251	53357	53357	53355	220621_E_212.raw	F6.12	NA	2158	3.06	2	FALSE	0.0002752	0.00197	0.412
High	Sequest HT	Sequest HT (A5)	A	5	Unambiguous	DDTAVLVIDNGSGMCKAGFAGDDAPR	[D].dDTAVLVIDNGSGMckAGFAGDDAPR.[A]	4	A5A3E0; P0CG38	A5A3E0	POTE ankyrin domain family member F OS=Homo sapiens OX=9606 GN=POTEF PE=1 SV=2;POTE ankyrin domain family member I OS=Homo sapiens OX=9606 GN=POTEI PE=3 SV=1	A5A3E0; P0CG39; Q6S8J3; P0CG38	POTE ankyrin domain family member F OS=Homo sapiens OX=9606 GN=POTEF PE=1 SV=2; POTE ankyrin domain family member J OS=Homo sapiens OX=9606 GN=POTEJ PE=3 SV=1; POTE ankyrin domain family member E OS=Homo sapiens OX=9606 GN=POTEE PE=2 SV=3; POTE ankyrin domain family member I OS=Homo sapiens OX=9606 GN=POTEI PE=3 SV=1	0	2	2	0.5846	0	1	1	1	1449.67	1449.67	2898.34	2898.36	-7.89	-0.01144	0/0	0	0	1.71536e+06	HCD	MS2	0	120	115.784	54543	54543	54538	220621_E_212.raw	F6.12	NA	1700	3.37	2	FALSE	3.982e-05	0.000183	0.666
High	Sequest HT	Sequest HT (A5)	A	5	Selected	DDTAVLVIDNGSGMCKAGFAGDDAPR	[D].dDTAVLVIDNGSGMckAGFAGDDAPR.[A]	4	A5A3E0; P0CG38	A5A3E0	POTE ankyrin domain family member F OS=Homo sapiens OX=9606 GN=POTEF PE=1 SV=2;POTE ankyrin domain family member I OS=Homo sapiens OX=9606 GN=POTEI PE=3 SV=1	A5A3E0; P0CG39; Q6S8J3; P0CG38	POTE ankyrin domain family member F OS=Homo sapiens OX=9606 GN=POTEF PE=1 SV=2; POTE ankyrin domain family member J OS=Homo sapiens OX=9606 GN=POTEJ PE=3 SV=1; POTE ankyrin domain family member E OS=Homo sapiens OX=9606 GN=POTEE PE=2 SV=3; POTE ankyrin domain family member I OS=Homo sapiens OX=9606 GN=POTEI PE=3 SV=1	0	3	3	0.3776	0	1	1	1	966.801	966.801	2898.39	2898.36	9.15	0.00884	0/0	0	0	4.09083e+06	HCD	MS2	22.021	103.736	117.899	55520	55520	55513	220621_E_212.raw	F6.12	NA	2719	3.31	2	FALSE	0.007355	0.07031	0.036
High	Sequest HT	Sequest HT (A5)	A	5	Unambiguous	DDTAVLVIDNGSGMCKAGFAGDDAPR	[D].dDTAVLVIDNGSGmckAGFAGDDAPR.[A]	4	A5A3E0; P0CG38	A5A3E0	POTE ankyrin domain family member F OS=Homo sapiens OX=9606 GN=POTEF PE=1 SV=2;POTE ankyrin domain family member I OS=Homo sapiens OX=9606 GN=POTEI PE=3 SV=1	A5A3E0; P0CG39; Q6S8J3; P0CG38	POTE ankyrin domain family member F OS=Homo sapiens OX=9606 GN=POTEF PE=1 SV=2; POTE ankyrin domain family member J OS=Homo sapiens OX=9606 GN=POTEJ PE=3 SV=1; POTE ankyrin domain family member E OS=Homo sapiens OX=9606 GN=POTEE PE=2 SV=3; POTE ankyrin domain family member I OS=Homo sapiens OX=9606 GN=POTEI PE=3 SV=1	0	3	3	0.6274	0	1	1	1	972.118	972.118	2914.34	2914.36	-6.66	-0.00647	0/0	0	0	1518001	HCD	MS2	46.2972	120	113.083	49803	49803	49793	220621_E_301.raw	F7.1	NA	1513	4.75	2	FALSE	1.762e-05	5.199e-05	0.81
High	Sequest HT	Sequest HT (A5)	A	5	Unambiguous	DDTAVLVIDNGSGMCKAGFAGDDAPR	[D].dDTAVLVIDNGSGmckAGFAGDDAPR.[A]	4	A5A3E0; P0CG38	A5A3E0	POTE ankyrin domain family member F OS=Homo sapiens OX=9606 GN=POTEF PE=1 SV=2;POTE ankyrin domain family member I OS=Homo sapiens OX=9606 GN=POTEI PE=3 SV=1	A5A3E0; P0CG39; Q6S8J3; P0CG38	POTE ankyrin domain family member F OS=Homo sapiens OX=9606 GN=POTEF PE=1 SV=2; POTE ankyrin domain family member J OS=Homo sapiens OX=9606 GN=POTEJ PE=3 SV=1; POTE ankyrin domain family member E OS=Homo sapiens OX=9606 GN=POTEE PE=2 SV=3; POTE ankyrin domain family member I OS=Homo sapiens OX=9606 GN=POTEI PE=3 SV=1	0	2	0	0.6497	0	1	1	1	1457.68	1457.68	2914.35	2914.36	-4.32	-0.00629	0/0	0	0	26380000	HCD	MS2	70.4246	16.769	115.43	50799	50799	50794	220621_E_301.raw	F7.1	NoneMonoisotopic	1628	5.31	2	FALSE	9.269e-06	1.483e-07	1.451
High	Sequest HT	Sequest HT (A5)	A	5	Unambiguous	DDTAVLVIDNGSGMCKAGFAGDDAPR	[D].dDTAVLVIDNGSGmckAGFAGDDAPR.[A]	4	A5A3E0; P0CG38	A5A3E0	POTE ankyrin domain family member F OS=Homo sapiens OX=9606 GN=POTEF PE=1 SV=2;POTE ankyrin domain family member I OS=Homo sapiens OX=9606 GN=POTEI PE=3 SV=1	A5A3E0; P0CG39; Q6S8J3; P0CG38	POTE ankyrin domain family member F OS=Homo sapiens OX=9606 GN=POTEF PE=1 SV=2; POTE ankyrin domain family member J OS=Homo sapiens OX=9606 GN=POTEJ PE=3 SV=1; POTE ankyrin domain family member E OS=Homo sapiens OX=9606 GN=POTEE PE=2 SV=3; POTE ankyrin domain family member I OS=Homo sapiens OX=9606 GN=POTEI PE=3 SV=1	0	3	3	0.6407	0	1	1	1	972.116	972.116	2914.33	2914.36	-8.02	-0.00779	0/0	0	0	7.54999e+06	HCD	MS2	15.1107	36.22	116.749	51368	51368	51366	220621_E_301.raw	F7.1	NA	1478	4.62	2	FALSE	9.269e-06	2.635e-06	1.137
High	Sequest HT	Sequest HT (A5)	A	5	Selected	DDTAVLVIDNGSGMCKAGFAGDDAPR	[D].dDTAVLVIDNGSGmckAGFAGDDAPR.[A]	4	A5A3E0; P0CG38	A5A3E0	POTE ankyrin domain family member F OS=Homo sapiens OX=9606 GN=POTEF PE=1 SV=2;POTE ankyrin domain family member I OS=Homo sapiens OX=9606 GN=POTEI PE=3 SV=1	A5A3E0; P0CG39; Q6S8J3; P0CG38	POTE ankyrin domain family member F OS=Homo sapiens OX=9606 GN=POTEF PE=1 SV=2; POTE ankyrin domain family member J OS=Homo sapiens OX=9606 GN=POTEJ PE=3 SV=1; POTE ankyrin domain family member E OS=Homo sapiens OX=9606 GN=POTEE PE=2 SV=3; POTE ankyrin domain family member I OS=Homo sapiens OX=9606 GN=POTEI PE=3 SV=1	0	3	3	0.5113	0	1	1	1	972.119	972.119	2914.34	2914.36	-4.79	-0.00465	0/0	0	0	784434	HCD	MS2	40.9951	120	122.788	53842	53842	53836	220621_E_301.raw	F7.1	NA	1610	3.09	2	FALSE	0.003186	0.02803	0.135
High	Sequest HT	Sequest HT (A5)	A	5	Unambiguous	DDTAVLVIDNGSGMCKAGFAGDDAPR	[D].dDTAVLVIDNGSGMckAGFAGDDAPR.[A]	4	A5A3E0; P0CG38	A5A3E0	POTE ankyrin domain family member F OS=Homo sapiens OX=9606 GN=POTEF PE=1 SV=2;POTE ankyrin domain family member I OS=Homo sapiens OX=9606 GN=POTEI PE=3 SV=1	A5A3E0; P0CG39; Q6S8J3; P0CG38	POTE ankyrin domain family member F OS=Homo sapiens OX=9606 GN=POTEF PE=1 SV=2; POTE ankyrin domain family member J OS=Homo sapiens OX=9606 GN=POTEJ PE=3 SV=1; POTE ankyrin domain family member E OS=Homo sapiens OX=9606 GN=POTEE PE=2 SV=3; POTE ankyrin domain family member I OS=Homo sapiens OX=9606 GN=POTEI PE=3 SV=1	0	2	2	0.672	0	1	1	1	1449.67	1449.67	2898.34	2898.36	-8.52	-0.01235	0/0	0	0	468882	HCD	MS2	31.0824	120	124.575	54560	54560	54551	220621_E_301.raw	F7.1	NA	1677	3.75	2	FALSE	3.982e-05	0.0001311	0.704
High	Sequest HT	Sequest HT (A5)	A	5	Unambiguous	DDTAVLVIDNGSGMCKAGFAGDDAPR	[D].dDTAVLVIDNGSGmckAGFAGDDAPR.[A]	4	A5A3E0; P0CG38	A5A3E0	POTE ankyrin domain family member F OS=Homo sapiens OX=9606 GN=POTEF PE=1 SV=2;POTE ankyrin domain family member I OS=Homo sapiens OX=9606 GN=POTEI PE=3 SV=1	A5A3E0; P0CG39; Q6S8J3; P0CG38	POTE ankyrin domain family member F OS=Homo sapiens OX=9606 GN=POTEF PE=1 SV=2; POTE ankyrin domain family member J OS=Homo sapiens OX=9606 GN=POTEJ PE=3 SV=1; POTE ankyrin domain family member E OS=Homo sapiens OX=9606 GN=POTEE PE=2 SV=3; POTE ankyrin domain family member I OS=Homo sapiens OX=9606 GN=POTEI PE=3 SV=1	0	3	0	0.5929	0	1	1	1	972.121	972.122	2914.35	2914.36	-3.04	-0.00295	0/0	0	0	1.78466e+06	HCD	MS2	75.658	120	111.266	47109	47109	47102	220621_E_304.raw	F7.4	NoneMonoisotopic	1700	4.52	2	FALSE	9.269e-06	3.073e-07	1.372
High	Sequest HT	Sequest HT (A5)	A	5	Unambiguous	DDTAVLVIDNGSGMCKAGFAGDDAPR	[D].dDTAVLVIDNGSGmckAGFAGDDAPR.[A]	4	A5A3E0; P0CG38	A5A3E0	POTE ankyrin domain family member F OS=Homo sapiens OX=9606 GN=POTEF PE=1 SV=2;POTE ankyrin domain family member I OS=Homo sapiens OX=9606 GN=POTEI PE=3 SV=1	A5A3E0; P0CG39; Q6S8J3; P0CG38	POTE ankyrin domain family member F OS=Homo sapiens OX=9606 GN=POTEF PE=1 SV=2; POTE ankyrin domain family member J OS=Homo sapiens OX=9606 GN=POTEJ PE=3 SV=1; POTE ankyrin domain family member E OS=Homo sapiens OX=9606 GN=POTEE PE=2 SV=3; POTE ankyrin domain family member I OS=Homo sapiens OX=9606 GN=POTEI PE=3 SV=1	0	3	0	0.5826	0	1	1	1	972.119	972.12	2914.34	2914.36	-4.89	-0.00475	0/0	0	0	1.85736e+06	HCD	MS2	76.4243	120	116.792	49451	49451	49442	220621_E_304.raw	F7.4	NoneMonoisotopic	1606	4.6	2	FALSE	9.269e-06	2.446e-05	0.894
High	Sequest HT	Sequest HT (A5)	A	5	Unambiguous	DDTAVLVIDNGSGMCKAGFAGDDAPR	[D].dDTAVLVIDNGSGmckAGFAGDDAPR.[A]	4	A5A3E0; P0CG38	A5A3E0	POTE ankyrin domain family member F OS=Homo sapiens OX=9606 GN=POTEF PE=1 SV=2;POTE ankyrin domain family member I OS=Homo sapiens OX=9606 GN=POTEI PE=3 SV=1	A5A3E0; P0CG39; Q6S8J3; P0CG38	POTE ankyrin domain family member F OS=Homo sapiens OX=9606 GN=POTEF PE=1 SV=2; POTE ankyrin domain family member J OS=Homo sapiens OX=9606 GN=POTEJ PE=3 SV=1; POTE ankyrin domain family member E OS=Homo sapiens OX=9606 GN=POTEE PE=2 SV=3; POTE ankyrin domain family member I OS=Homo sapiens OX=9606 GN=POTEI PE=3 SV=1	0	3	0	0.4341	0	1	1	1	972.126	972.127	2914.36	2914.36	2.14	0.00208	0/0	0	0	6855992	HCD	MS2	69.9131	37.297	117.326	49671	49671	49663	220621_E_304.raw	F7.4	NA	1958	3.11	2	FALSE	0.0006075	0.005275	0.313
High	Sequest HT	Sequest HT (A5)	A	5	Unambiguous	DDTAVLVIDNGSGMCKAGFAGDDAPR	[D].dDTAVLVIDNGSGmckAGFAGDDAPR.[A]	4	A5A3E0; P0CG38	A5A3E0	POTE ankyrin domain family member F OS=Homo sapiens OX=9606 GN=POTEF PE=1 SV=2;POTE ankyrin domain family member I OS=Homo sapiens OX=9606 GN=POTEI PE=3 SV=1	A5A3E0; P0CG39; Q6S8J3; P0CG38	POTE ankyrin domain family member F OS=Homo sapiens OX=9606 GN=POTEF PE=1 SV=2; POTE ankyrin domain family member J OS=Homo sapiens OX=9606 GN=POTEJ PE=3 SV=1; POTE ankyrin domain family member E OS=Homo sapiens OX=9606 GN=POTEE PE=2 SV=3; POTE ankyrin domain family member I OS=Homo sapiens OX=9606 GN=POTEI PE=3 SV=1	0	3	3	0.3006	0	1	1	1	972.126	972.126	2914.36	2914.36	1.83	0.00177	0/0	0	0	2.36651e+06	HCD	MS2	55.8502	119.71	117.417	49709	49709	49702	220621_E_304.raw	F7.4	NA	1951	3.16	2	FALSE	0.006574	0.06348	0.047
High	Sequest HT	Sequest HT (A5)	A	5	Unambiguous	DDTAVLVIDNGSGMCKAGFAGDDAPR	[D].dDTAVLVIDNGSGmckAGFAGDDAPR.[A]	4	A5A3E0; P0CG38	A5A3E0	POTE ankyrin domain family member F OS=Homo sapiens OX=9606 GN=POTEF PE=1 SV=2;POTE ankyrin domain family member I OS=Homo sapiens OX=9606 GN=POTEI PE=3 SV=1	A5A3E0; P0CG39; Q6S8J3; P0CG38	POTE ankyrin domain family member F OS=Homo sapiens OX=9606 GN=POTEF PE=1 SV=2; POTE ankyrin domain family member J OS=Homo sapiens OX=9606 GN=POTEJ PE=3 SV=1; POTE ankyrin domain family member E OS=Homo sapiens OX=9606 GN=POTEE PE=2 SV=3; POTE ankyrin domain family member I OS=Homo sapiens OX=9606 GN=POTEI PE=3 SV=1	0	3	3	0.4895	0	1	1	1	972.116	972.117	2914.33	2914.36	-8.02	-0.00779	0/0	0	0	801810	HCD	MS2	43.5193	120	121.145	51273	51273	51262	220621_E_304.raw	F7.4	NA	1476	3.82	2	FALSE	0.002745	0.02444	0.151
High	Sequest HT	Sequest HT (A5)	A	5	Selected	DDTAVLVIDNGSGMCKAGFAGDDAPR	[D].dDTAVLVIDNGSGMckAGFAGDDAPR.[A]	4	A5A3E0; P0CG38	A5A3E0	POTE ankyrin domain family member F OS=Homo sapiens OX=9606 GN=POTEF PE=1 SV=2;POTE ankyrin domain family member I OS=Homo sapiens OX=9606 GN=POTEI PE=3 SV=1	A5A3E0; P0CG39; Q6S8J3; P0CG38	POTE ankyrin domain family member F OS=Homo sapiens OX=9606 GN=POTEF PE=1 SV=2; POTE ankyrin domain family member J OS=Homo sapiens OX=9606 GN=POTEJ PE=3 SV=1; POTE ankyrin domain family member E OS=Homo sapiens OX=9606 GN=POTEE PE=2 SV=3; POTE ankyrin domain family member I OS=Homo sapiens OX=9606 GN=POTEI PE=3 SV=1	0	2	0	0.6633	0	1	1	1	1449.68	1449.68	2898.35	2898.36	-4.08	-0.00592	0/0	0	0	2.4299e+06	HCD	MS2	68.7421	120	121.579	51440	51440	51431	220621_E_304.raw	F7.4	NA	1890	4.9	2	FALSE	9.269e-06	2.143e-08	1.662
High	Sequest HT	Sequest HT (A5)	A	5	Unambiguous	DDTAVLVIDNGSGMCKAGFAGDDAPR	[D].dDTAVLVIDNGSGmckAGFAGDDAPR.[A]	4	A5A3E0; P0CG38	A5A3E0	POTE ankyrin domain family member F OS=Homo sapiens OX=9606 GN=POTEF PE=1 SV=2;POTE ankyrin domain family member I OS=Homo sapiens OX=9606 GN=POTEI PE=3 SV=1	A5A3E0; P0CG39; Q6S8J3; P0CG38	POTE ankyrin domain family member F OS=Homo sapiens OX=9606 GN=POTEF PE=1 SV=2; POTE ankyrin domain family member J OS=Homo sapiens OX=9606 GN=POTEJ PE=3 SV=1; POTE ankyrin domain family member E OS=Homo sapiens OX=9606 GN=POTEE PE=2 SV=3; POTE ankyrin domain family member I OS=Homo sapiens OX=9606 GN=POTEI PE=3 SV=1	0	3	0	0.4788	0	1	1	1	972.125	972.125	2914.36	2914.36	0.92	0.00089	0/0	0	0	22545856	HCD	MS2	73.577	11.017	121.671	51478	51478	51470	220621_E_304.raw	F7.4	NA	1892	3.07	2	FALSE	0.001718	0.01538	0.203
High	Sequest HT	Sequest HT (A5)	A	5	Selected	DDTAVLVIDNGSGMCKAGFAGDDAPR	[D].dDTAVLVIDNGSGMckAGFAGDDAPR.[A]	4	A5A3E0; P0CG38	A5A3E0	POTE ankyrin domain family member F OS=Homo sapiens OX=9606 GN=POTEF PE=1 SV=2;POTE ankyrin domain family member I OS=Homo sapiens OX=9606 GN=POTEI PE=3 SV=1	A5A3E0; P0CG39; Q6S8J3; P0CG38	POTE ankyrin domain family member F OS=Homo sapiens OX=9606 GN=POTEF PE=1 SV=2; POTE ankyrin domain family member J OS=Homo sapiens OX=9606 GN=POTEJ PE=3 SV=1; POTE ankyrin domain family member E OS=Homo sapiens OX=9606 GN=POTEE PE=2 SV=3; POTE ankyrin domain family member I OS=Homo sapiens OX=9606 GN=POTEI PE=3 SV=1	0	2	0	0.6707	0	1	1	1	1449.68	1449.68	2898.35	2898.36	-5.01	-0.00725	0/0	0	0	28670904	HCD	MS2	68.7107	24.002	121.732	51505	51505	51496	220621_E_304.raw	F7.4	NA	1858	4.98	2	FALSE	9.269e-06	1.086e-07	1.485
High	Sequest HT	Sequest HT (A5)	A	5	Selected	DDTAVLVIDNGSGMCKAGFAGDDAPR	[D].dDTAVLVIDNGSGMckAGFAGDDAPR.[A]	4	A5A3E0; P0CG38	A5A3E0	POTE ankyrin domain family member F OS=Homo sapiens OX=9606 GN=POTEF PE=1 SV=2;POTE ankyrin domain family member I OS=Homo sapiens OX=9606 GN=POTEI PE=3 SV=1	A5A3E0; P0CG39; Q6S8J3; P0CG38	POTE ankyrin domain family member F OS=Homo sapiens OX=9606 GN=POTEF PE=1 SV=2; POTE ankyrin domain family member J OS=Homo sapiens OX=9606 GN=POTEJ PE=3 SV=1; POTE ankyrin domain family member E OS=Homo sapiens OX=9606 GN=POTEE PE=2 SV=3; POTE ankyrin domain family member I OS=Homo sapiens OX=9606 GN=POTEI PE=3 SV=1	0	2	0	0.7163	0	1	1	1	1449.68	1449.68	2898.35	2898.36	-5.42	-0.00786	0/0	0	0	27671130	HCD	MS2	64.9956	21.964	121.845	51553	51553	51548	220621_E_304.raw	F7.4	NA	1813	4.9	2	FALSE	9.269e-06	3.162e-08	1.619
High	Sequest HT	Sequest HT (A5)	A	5	Selected	DDTAVLVIDNGSGMCKAGFAGDDAPR	[D].dDTAVLVIDNGSGMckAGFAGDDAPR.[A]	4	A5A3E0; P0CG38	A5A3E0	POTE ankyrin domain family member F OS=Homo sapiens OX=9606 GN=POTEF PE=1 SV=2;POTE ankyrin domain family member I OS=Homo sapiens OX=9606 GN=POTEI PE=3 SV=1	A5A3E0; P0CG39; Q6S8J3; P0CG38	POTE ankyrin domain family member F OS=Homo sapiens OX=9606 GN=POTEF PE=1 SV=2; POTE ankyrin domain family member J OS=Homo sapiens OX=9606 GN=POTEJ PE=3 SV=1; POTE ankyrin domain family member E OS=Homo sapiens OX=9606 GN=POTEE PE=2 SV=3; POTE ankyrin domain family member I OS=Homo sapiens OX=9606 GN=POTEI PE=3 SV=1	0	2	0	0.6463	0	1	1	1	1449.68	1449.68	2898.35	2898.36	-6.06	-0.00878	0/0	0	0	952129	HCD	MS2	58.732	120	123.445	52171	52171	52159	220621_E_304.raw	F7.4	NoneMonoisotopic	1819	4.58	2	FALSE	9.269e-06	1.285e-08	1.717
High	Sequest HT	Sequest HT (A5)	A	5	Unambiguous	DDTAVLVIDNGSGMCKAGFAGDDAPR	[D].dDTAVLVIDNGSGmckAGFAGDDAPR.[A]	4	A5A3E0; P0CG38	A5A3E0	POTE ankyrin domain family member F OS=Homo sapiens OX=9606 GN=POTEF PE=1 SV=2;POTE ankyrin domain family member I OS=Homo sapiens OX=9606 GN=POTEI PE=3 SV=1	A5A3E0; P0CG39; Q6S8J3; P0CG38	POTE ankyrin domain family member F OS=Homo sapiens OX=9606 GN=POTEF PE=1 SV=2; POTE ankyrin domain family member J OS=Homo sapiens OX=9606 GN=POTEJ PE=3 SV=1; POTE ankyrin domain family member E OS=Homo sapiens OX=9606 GN=POTEE PE=2 SV=3; POTE ankyrin domain family member I OS=Homo sapiens OX=9606 GN=POTEI PE=3 SV=1	0	3	3	0.5356	0	1	1	1	972.117	972.117	2914.34	2914.36	-7.01	-0.00681	0/0	0	0	1.24086e+06	HCD	MS2	40.5733	120	125.281	52885	52885	52874	220621_E_304.raw	F7.4	NoneMonoisotopic	1510	3.23	2	FALSE	0.0003882	0.003132	0.365
High	Sequest HT	Sequest HT (A5)	A	5	Selected	DDTAVLVIDNGSGMCKAGFAGDDAPR	[D].dDTAVLVIDNGSGmckAGFAGDDAPR.[A]	4	A5A3E0; P0CG38	A5A3E0	POTE ankyrin domain family member F OS=Homo sapiens OX=9606 GN=POTEF PE=1 SV=2;POTE ankyrin domain family member I OS=Homo sapiens OX=9606 GN=POTEI PE=3 SV=1	A5A3E0; P0CG39; Q6S8J3; P0CG38	POTE ankyrin domain family member F OS=Homo sapiens OX=9606 GN=POTEF PE=1 SV=2; POTE ankyrin domain family member J OS=Homo sapiens OX=9606 GN=POTEJ PE=3 SV=1; POTE ankyrin domain family member E OS=Homo sapiens OX=9606 GN=POTEE PE=2 SV=3; POTE ankyrin domain family member I OS=Homo sapiens OX=9606 GN=POTEI PE=3 SV=1	0	3	3	0.4469	0	1	1	1	972.126	972.126	2914.36	2914.36	1.67	0.00163	0/0	0	0	3.14222e+06	HCD	MS2	26.7196	53.558	121.997	53447	53447	53446	220621_E_305.raw	F7.5	NA	1943	3.11	2	FALSE	0.0001443	0.00107	0.474
High	Sequest HT	Sequest HT (A5)	A	5	Unambiguous	DDTAVLVIDNGSGMCKAGFAGDDAPR	[D].dDTAVLVIDNGSGMckAGFAGDDAPR.[A]	4	A5A3E0; P0CG38	A5A3E0	POTE ankyrin domain family member F OS=Homo sapiens OX=9606 GN=POTEF PE=1 SV=2;POTE ankyrin domain family member I OS=Homo sapiens OX=9606 GN=POTEI PE=3 SV=1	A5A3E0; P0CG39; Q6S8J3; P0CG38	POTE ankyrin domain family member F OS=Homo sapiens OX=9606 GN=POTEF PE=1 SV=2; POTE ankyrin domain family member J OS=Homo sapiens OX=9606 GN=POTEJ PE=3 SV=1; POTE ankyrin domain family member E OS=Homo sapiens OX=9606 GN=POTEE PE=2 SV=3; POTE ankyrin domain family member I OS=Homo sapiens OX=9606 GN=POTEI PE=3 SV=1	0	3	3	0.5892	0	1	1	1	966.787	966.787	2898.35	2898.36	-5.48	-0.00529	0/0	0	0	3204251	HCD	MS2	35.4636	97.242	122.297	53564	53564	53563	220621_E_305.raw	F7.5	NoneMonoisotopic	1807	4.99	2	FALSE	9.269e-06	8.323e-06	1.012
High	Sequest HT	Sequest HT (A5)	A	5	Selected	DDTAVLVIDNGSGMCKAGFAGDDAPR	[D].dDTAVLVIDNGSGmckAGFAGDDAPR.[A]	4	A5A3E0; P0CG38	A5A3E0	POTE ankyrin domain family member F OS=Homo sapiens OX=9606 GN=POTEF PE=1 SV=2;POTE ankyrin domain family member I OS=Homo sapiens OX=9606 GN=POTEI PE=3 SV=1	A5A3E0; P0CG39; Q6S8J3; P0CG38	POTE ankyrin domain family member F OS=Homo sapiens OX=9606 GN=POTEF PE=1 SV=2; POTE ankyrin domain family member J OS=Homo sapiens OX=9606 GN=POTEJ PE=3 SV=1; POTE ankyrin domain family member E OS=Homo sapiens OX=9606 GN=POTEE PE=2 SV=3; POTE ankyrin domain family member I OS=Homo sapiens OX=9606 GN=POTEI PE=3 SV=1	0	3	3	0.2896	0	1	1	1	972.127	972.127	2914.37	2914.36	2.98	0.00289	0/0	0	0	2185383	HCD	MS2	47.1887	120	123.567	54082	54082	54070	220621_E_305.raw	F7.5	NA	2016	2.97	2	FALSE	0.005831	0.05557	0.061
High	Sequest HT	Sequest HT (A5)	A	5	Unambiguous	DDTAVLVIDNGSGMCKAGFAGDDAPR	[D].dDTAVLVIDNGSGMckAGFAGDDAPR.[A]	4	A5A3E0; P0CG38	A5A3E0	POTE ankyrin domain family member F OS=Homo sapiens OX=9606 GN=POTEF PE=1 SV=2;POTE ankyrin domain family member I OS=Homo sapiens OX=9606 GN=POTEI PE=3 SV=1	A5A3E0; P0CG39; Q6S8J3; P0CG38	POTE ankyrin domain family member F OS=Homo sapiens OX=9606 GN=POTEF PE=1 SV=2; POTE ankyrin domain family member J OS=Homo sapiens OX=9606 GN=POTEJ PE=3 SV=1; POTE ankyrin domain family member E OS=Homo sapiens OX=9606 GN=POTEE PE=2 SV=3; POTE ankyrin domain family member I OS=Homo sapiens OX=9606 GN=POTEI PE=3 SV=1	0	3	0	0.4866	0	1	1	1	966.791	966.792	2898.36	2898.36	-1.49	-0.00144	0/0	0	0	1.70793e+06	HCD	MS2	81.4325	120	121.556	51741	51741	51730	220621_E_306.raw	F7.6	NoneMonoisotopic	2023	3.72	2	FALSE	0.0001901	0.001389	0.448
High	Sequest HT	Sequest HT (A5)	A	5	Unambiguous	DDTAVLVIDNGSGMCKAGFAGDDAPR	[D].dDTAVLVIDNGSGMckAGFAGDDAPR.[A]	4	A5A3E0; P0CG38	A5A3E0	POTE ankyrin domain family member F OS=Homo sapiens OX=9606 GN=POTEF PE=1 SV=2;POTE ankyrin domain family member I OS=Homo sapiens OX=9606 GN=POTEI PE=3 SV=1	A5A3E0; P0CG39; Q6S8J3; P0CG38	POTE ankyrin domain family member F OS=Homo sapiens OX=9606 GN=POTEF PE=1 SV=2; POTE ankyrin domain family member J OS=Homo sapiens OX=9606 GN=POTEJ PE=3 SV=1; POTE ankyrin domain family member E OS=Homo sapiens OX=9606 GN=POTEE PE=2 SV=3; POTE ankyrin domain family member I OS=Homo sapiens OX=9606 GN=POTEI PE=3 SV=1	0	3	3	0.6163	0	1	1	1	966.789	966.79	2898.35	2898.36	-3.55	-0.00343	0/0	0	0	4.5701e+06	HCD	MS2	45.7719	120	121.925	51893	51893	51886	220621_E_306.raw	F7.6	NoneMonoisotopic	1948	4.9	2	FALSE	3.982e-05	0.0001689	0.675
High	Sequest HT	Sequest HT (A5)	A	5	Unambiguous	DDTAVLVIDNGSGMCKAGFAGDDAPR	[D].dDTAVLVIDNGSGmckAGFAGDDAPR.[A]	4	A5A3E0; P0CG38	A5A3E0	POTE ankyrin domain family member F OS=Homo sapiens OX=9606 GN=POTEF PE=1 SV=2;POTE ankyrin domain family member I OS=Homo sapiens OX=9606 GN=POTEI PE=3 SV=1	A5A3E0; P0CG39; Q6S8J3; P0CG38	POTE ankyrin domain family member F OS=Homo sapiens OX=9606 GN=POTEF PE=1 SV=2; POTE ankyrin domain family member J OS=Homo sapiens OX=9606 GN=POTEJ PE=3 SV=1; POTE ankyrin domain family member E OS=Homo sapiens OX=9606 GN=POTEE PE=2 SV=3; POTE ankyrin domain family member I OS=Homo sapiens OX=9606 GN=POTEI PE=3 SV=1	0	3	3	0.4203	0	1	1	1	972.124	972.125	2914.36	2914.36	-0.13	-0.00012	0/0	0	0	1.29211e+06	HCD	MS2	60.0262	120	124.427	52898	52898	52887	220621_E_306.raw	F7.6	NoneMonoisotopic	1834	2.95	2	FALSE	0.0003917	0.003238	0.362
High	Sequest HT	Sequest HT (A5)	A	5	Unambiguous	DDTAVLVIDNGSGMCKAGFAGDDAPR	[D].dDTAVLVIDNGSGMckAGFAGDDAPR.[A]	4	A5A3E0; P0CG38	A5A3E0	POTE ankyrin domain family member F OS=Homo sapiens OX=9606 GN=POTEF PE=1 SV=2;POTE ankyrin domain family member I OS=Homo sapiens OX=9606 GN=POTEI PE=3 SV=1	A5A3E0; P0CG39; Q6S8J3; P0CG38	POTE ankyrin domain family member F OS=Homo sapiens OX=9606 GN=POTEF PE=1 SV=2; POTE ankyrin domain family member J OS=Homo sapiens OX=9606 GN=POTEJ PE=3 SV=1; POTE ankyrin domain family member E OS=Homo sapiens OX=9606 GN=POTEE PE=2 SV=3; POTE ankyrin domain family member I OS=Homo sapiens OX=9606 GN=POTEI PE=3 SV=1	0	3	0	0.4419	0	1	1	1	966.794	966.794	2898.37	2898.36	1.93	0.00187	0/0	0	0	733691	HCD	MS2	42.3499	120	122.474	48178	48178	48168	220621_E_307.raw	F7.7	NA	2238	2.67	2	FALSE	0.004485	0.04036	0.095
High	Sequest HT	Sequest HT (A5)	A	5	Unambiguous	DDTAVLVIDNGSGMCKAGFAGDDAPR	[D].dDTAVLVIDNGSGMckAGFAGDDAPR.[A]	4	A5A3E0; P0CG38	A5A3E0	POTE ankyrin domain family member F OS=Homo sapiens OX=9606 GN=POTEF PE=1 SV=2;POTE ankyrin domain family member I OS=Homo sapiens OX=9606 GN=POTEI PE=3 SV=1	A5A3E0; P0CG39; Q6S8J3; P0CG38	POTE ankyrin domain family member F OS=Homo sapiens OX=9606 GN=POTEF PE=1 SV=2; POTE ankyrin domain family member J OS=Homo sapiens OX=9606 GN=POTEJ PE=3 SV=1; POTE ankyrin domain family member E OS=Homo sapiens OX=9606 GN=POTEE PE=2 SV=3; POTE ankyrin domain family member I OS=Homo sapiens OX=9606 GN=POTEI PE=3 SV=1	0	3	0	0.6272	0	1	1	1	966.785	966.786	2898.34	2898.36	-7.18	-0.00694	0/0	0	0	1.28274e+06	HCD	MS2	57.0514	120	121.774	51244	51244	51232	220621_E_308.raw	F7.8	NoneMonoisotopic	1750	4.64	2	FALSE	4.57e-05	0.00029	0.614
High	Sequest HT	Sequest HT (A5)	A	5	Unambiguous	DDTAVLVIDNGSGMCKAGFAGDDAPR	[D].dDTAVLVIDNGSGmckAGFAGDDAPR.[A]	4	A5A3E0; P0CG38	A5A3E0	POTE ankyrin domain family member F OS=Homo sapiens OX=9606 GN=POTEF PE=1 SV=2;POTE ankyrin domain family member I OS=Homo sapiens OX=9606 GN=POTEI PE=3 SV=1	A5A3E0; P0CG39; Q6S8J3; P0CG38	POTE ankyrin domain family member F OS=Homo sapiens OX=9606 GN=POTEF PE=1 SV=2; POTE ankyrin domain family member J OS=Homo sapiens OX=9606 GN=POTEJ PE=3 SV=1; POTE ankyrin domain family member E OS=Homo sapiens OX=9606 GN=POTEE PE=2 SV=3; POTE ankyrin domain family member I OS=Homo sapiens OX=9606 GN=POTEI PE=3 SV=1	0	3	3	0.6524	0	1	1	1	972.116	972.117	2914.33	2914.36	-8.13	-0.0079	0/0	0	0	2.7294e+06	HCD	MS2	9.09767	120	112.321	45457	45457	45446	220621_E_309.raw	F7.9	NA	1473	4.43	2	FALSE	0.0003025	0.002318	0.395
High	Sequest HT	Sequest HT (A5)	A	5	Selected	DDTAVLVIDNGSGMCKAGFAGDDAPR	[D].dDTAVLVIDNGSGmckAGFAGDDAPR.[A]	4	A5A3E0; P0CG38	A5A3E0	POTE ankyrin domain family member F OS=Homo sapiens OX=9606 GN=POTEF PE=1 SV=2;POTE ankyrin domain family member I OS=Homo sapiens OX=9606 GN=POTEI PE=3 SV=1	A5A3E0; P0CG39; Q6S8J3; P0CG38	POTE ankyrin domain family member F OS=Homo sapiens OX=9606 GN=POTEF PE=1 SV=2; POTE ankyrin domain family member J OS=Homo sapiens OX=9606 GN=POTEJ PE=3 SV=1; POTE ankyrin domain family member E OS=Homo sapiens OX=9606 GN=POTEE PE=2 SV=3; POTE ankyrin domain family member I OS=Homo sapiens OX=9606 GN=POTEI PE=3 SV=1	0	3	0	0.4533	0	1	1	1	972.117	972.117	2914.34	2914.36	-7.28	-0.00707	0/0	0	0	833068	HCD	MS2	87.1584	120	126.779	51279	51279	51270	220621_E_309.raw	F7.9	NoneMonoisotopic	1509	4.28	2	FALSE	0.004444	0.03987	0.096
High	Sequest HT	Sequest HT (A5)	A	5	Unambiguous	DDTAVLVIDNGSGMCKAGFAGDDAPR	[D].dDTAVLVIDNGSGmckAGFAGDDAPR.[A]	4	A5A3E0; P0CG38	A5A3E0	POTE ankyrin domain family member F OS=Homo sapiens OX=9606 GN=POTEF PE=1 SV=2;POTE ankyrin domain family member I OS=Homo sapiens OX=9606 GN=POTEI PE=3 SV=1	A5A3E0; P0CG39; Q6S8J3; P0CG38	POTE ankyrin domain family member F OS=Homo sapiens OX=9606 GN=POTEF PE=1 SV=2; POTE ankyrin domain family member J OS=Homo sapiens OX=9606 GN=POTEJ PE=3 SV=1; POTE ankyrin domain family member E OS=Homo sapiens OX=9606 GN=POTEE PE=2 SV=3; POTE ankyrin domain family member I OS=Homo sapiens OX=9606 GN=POTEI PE=3 SV=1	0	3	3	0.6225	0	1	1	1	972.117	972.117	2914.34	2914.36	-7.56	-0.00735	0/0	0	0	1.69727e+06	HCD	MS2	49.4721	120	116.975	44946	44946	44936	220621_E_310.raw	F7.10	NA	1481	4.53	2	FALSE	0.0008201	0.007115	0.284
High	Sequest HT	Sequest HT (A5)	A	5	Unambiguous	DDTAVLVIDNGSGMCKAGFAGDDAPR	[D].dDTAVLVIDNGSGmckAGFAGDDAPR.[A]	4	A5A3E0; P0CG38	A5A3E0	POTE ankyrin domain family member F OS=Homo sapiens OX=9606 GN=POTEF PE=1 SV=2;POTE ankyrin domain family member I OS=Homo sapiens OX=9606 GN=POTEI PE=3 SV=1	A5A3E0; P0CG39; Q6S8J3; P0CG38	POTE ankyrin domain family member F OS=Homo sapiens OX=9606 GN=POTEF PE=1 SV=2; POTE ankyrin domain family member J OS=Homo sapiens OX=9606 GN=POTEJ PE=3 SV=1; POTE ankyrin domain family member E OS=Homo sapiens OX=9606 GN=POTEE PE=2 SV=3; POTE ankyrin domain family member I OS=Homo sapiens OX=9606 GN=POTEI PE=3 SV=1	0	3	3	0.6129	0	1	1	1	972.117	972.117	2914.34	2914.36	-7.6	-0.00739	0/0	0	0	2110050	HCD	MS2	48.603	120	119.135	45831	45831	45820	220621_E_310.raw	F7.10	NA	1480	4.34	2	FALSE	0.0003001	0.002189	0.401
High	Sequest HT	Sequest HT (A5)	A	5	Unambiguous	DDTAVLVIDNGSGMCKAGFAGDDAPR	[D].dDTAVLVIDNGSGmckAGFAGDDAPR.[A]	4	A5A3E0; P0CG38	A5A3E0	POTE ankyrin domain family member F OS=Homo sapiens OX=9606 GN=POTEF PE=1 SV=2;POTE ankyrin domain family member I OS=Homo sapiens OX=9606 GN=POTEI PE=3 SV=1	A5A3E0; P0CG39; Q6S8J3; P0CG38	POTE ankyrin domain family member F OS=Homo sapiens OX=9606 GN=POTEF PE=1 SV=2; POTE ankyrin domain family member J OS=Homo sapiens OX=9606 GN=POTEJ PE=3 SV=1; POTE ankyrin domain family member E OS=Homo sapiens OX=9606 GN=POTEE PE=2 SV=3; POTE ankyrin domain family member I OS=Homo sapiens OX=9606 GN=POTEI PE=3 SV=1	0	3	3	0.6496	0	1	1	1	972.116	972.116	2914.33	2914.36	-8.4	-0.00816	0/0	0	0	1.37239e+06	HCD	MS2	26.895	120	114.023	44840	44840	44837	220621_E_312.raw	F7.12	NA	1469	4.68	2	FALSE	0.0004546	0.004228	0.335
High	Sequest HT	Sequest HT (A5)	A	5	Unambiguous	DDTAVLVIDNGSGMCKAGFAGDDAPR	[D].dDTAVLVIDNGSGmckAGFAGDDAPR.[A]	4	A5A3E0; P0CG38	A5A3E0	POTE ankyrin domain family member F OS=Homo sapiens OX=9606 GN=POTEF PE=1 SV=2;POTE ankyrin domain family member I OS=Homo sapiens OX=9606 GN=POTEI PE=3 SV=1	A5A3E0; P0CG39; Q6S8J3; P0CG38	POTE ankyrin domain family member F OS=Homo sapiens OX=9606 GN=POTEF PE=1 SV=2; POTE ankyrin domain family member J OS=Homo sapiens OX=9606 GN=POTEJ PE=3 SV=1; POTE ankyrin domain family member E OS=Homo sapiens OX=9606 GN=POTEE PE=2 SV=3; POTE ankyrin domain family member I OS=Homo sapiens OX=9606 GN=POTEI PE=3 SV=1	0	3	0	0.6439	0	1	1	1	972.117	972.117	2914.34	2914.36	-7.73	-0.00751	0/0	0	0	820048	HCD	MS2	68.7664	120	105.773	42733	42733	42721	220428_iNrich_HELA_MG132_Trypsin_04.raw	F12.4	NoneMonoisotopic	1479	4.24	2	FALSE	3.982e-05	0.0002168	0.647
High	Sequest HT	Sequest HT (A5)	A	5	Unambiguous	DDTAVLVIDNGSGMCKAGFAGDDAPR	[D].dDTAVLVIDNGSGmckAGFAGDDAPR.[A]	4	A5A3E0; P0CG38	A5A3E0	POTE ankyrin domain family member F OS=Homo sapiens OX=9606 GN=POTEF PE=1 SV=2;POTE ankyrin domain family member I OS=Homo sapiens OX=9606 GN=POTEI PE=3 SV=1	A5A3E0; P0CG39; Q6S8J3; P0CG38	POTE ankyrin domain family member F OS=Homo sapiens OX=9606 GN=POTEF PE=1 SV=2; POTE ankyrin domain family member J OS=Homo sapiens OX=9606 GN=POTEJ PE=3 SV=1; POTE ankyrin domain family member E OS=Homo sapiens OX=9606 GN=POTEE PE=2 SV=3; POTE ankyrin domain family member I OS=Homo sapiens OX=9606 GN=POTEI PE=3 SV=1	0	3	0	0.2564	0	1	1	1	972.127	972.127	2914.37	2914.36	2.68	0.00261	0/0	0	0	614865	HCD	MS2	82.8677	120	107.537	43430	43430	43423	220428_iNrich_HELA_MG132_Trypsin_04.raw	F12.4	NoneMonoisotopic	1982	2.34	2	FALSE	0.009262	0.08829	0.009
High	Sequest HT	Sequest HT (A5)	A	5	Unambiguous	DDTAVLVIDNGSGMCKAGFAGDDAPR	[D].dDTAVLVIDNGSGmckAGFAGDDAPR.[A]	4	A5A3E0; P0CG38	A5A3E0	POTE ankyrin domain family member F OS=Homo sapiens OX=9606 GN=POTEF PE=1 SV=2;POTE ankyrin domain family member I OS=Homo sapiens OX=9606 GN=POTEI PE=3 SV=1	A5A3E0; P0CG39; Q6S8J3; P0CG38	POTE ankyrin domain family member F OS=Homo sapiens OX=9606 GN=POTEF PE=1 SV=2; POTE ankyrin domain family member J OS=Homo sapiens OX=9606 GN=POTEJ PE=3 SV=1; POTE ankyrin domain family member E OS=Homo sapiens OX=9606 GN=POTEE PE=2 SV=3; POTE ankyrin domain family member I OS=Homo sapiens OX=9606 GN=POTEI PE=3 SV=1	0	2	0	0.6782	0	1	1	1	1457.68	1457.68	2914.35	2914.36	-3.97	-0.00578	0/0	0	0	8619752	HCD	MS2	66.5805	48.899	107.581	42155	42155	42149	220428_iNrich_HELA_MG132_Trypsin_05.raw	F12.5	NA	1655	5.19	2	FALSE	9.269e-06	2.771e-07	1.383
High	Sequest HT	Sequest HT (A5)	A	5	Selected	DDTAVLVIDNGSGMCKAGFAGDDAPR	[D].dDTAVLVIDNGSGMckAGFAGDDAPR.[A]	4	A5A3E0; P0CG38	A5A3E0	POTE ankyrin domain family member F OS=Homo sapiens OX=9606 GN=POTEF PE=1 SV=2;POTE ankyrin domain family member I OS=Homo sapiens OX=9606 GN=POTEI PE=3 SV=1	A5A3E0; P0CG39; Q6S8J3; P0CG38	POTE ankyrin domain family member F OS=Homo sapiens OX=9606 GN=POTEF PE=1 SV=2; POTE ankyrin domain family member J OS=Homo sapiens OX=9606 GN=POTEJ PE=3 SV=1; POTE ankyrin domain family member E OS=Homo sapiens OX=9606 GN=POTEE PE=2 SV=3; POTE ankyrin domain family member I OS=Homo sapiens OX=9606 GN=POTEI PE=3 SV=1	0	2	0	0.5865	0	1	1	1	1449.68	1449.68	2898.35	2898.36	-5.76	-0.00835	0/0	0	0	491299	HCD	MS2	69.3683	120	109.697	42964	42964	42955	220428_iNrich_HELA_MG132_Trypsin_05.raw	F12.5	NA	1810	3.99	2	FALSE	9.269e-06	1.478e-06	1.2
High	Sequest HT	Sequest HT (A5)	A	5	Selected	DDTAVLVIDNGSGMCKAGFAGDDAPR	[D].dDTAVLVIDNGSGmckAGFAGDDAPR.[A]	4	A5A3E0; P0CG38	A5A3E0	POTE ankyrin domain family member F OS=Homo sapiens OX=9606 GN=POTEF PE=1 SV=2;POTE ankyrin domain family member I OS=Homo sapiens OX=9606 GN=POTEI PE=3 SV=1	A5A3E0; P0CG39; Q6S8J3; P0CG38	POTE ankyrin domain family member F OS=Homo sapiens OX=9606 GN=POTEF PE=1 SV=2; POTE ankyrin domain family member J OS=Homo sapiens OX=9606 GN=POTEJ PE=3 SV=1; POTE ankyrin domain family member E OS=Homo sapiens OX=9606 GN=POTEE PE=2 SV=3; POTE ankyrin domain family member I OS=Homo sapiens OX=9606 GN=POTEI PE=3 SV=1	0	3	3	0.4086	0	1	1	1	972.127	972.127	2914.37	2914.36	3.28	0.00318	0/0	0	0	7.77246e+06	HCD	MS2	8.77426	20.545	109.916	43047	43047	43046	220428_iNrich_HELA_MG132_Trypsin_05.raw	F12.5	NA	2026	2.57	2	FALSE	0.003718	0.03304	0.117
High	Sequest HT	Sequest HT (A5)	A	5	Selected	DDTAVLVIDNGSGMCKAGFAGDDAPR	[D].dDTAVLVIDNGSGmckAGFAGDDAPR.[A]	4	A5A3E0; P0CG38	A5A3E0	POTE ankyrin domain family member F OS=Homo sapiens OX=9606 GN=POTEF PE=1 SV=2;POTE ankyrin domain family member I OS=Homo sapiens OX=9606 GN=POTEI PE=3 SV=1	A5A3E0; P0CG39; Q6S8J3; P0CG38	POTE ankyrin domain family member F OS=Homo sapiens OX=9606 GN=POTEF PE=1 SV=2; POTE ankyrin domain family member J OS=Homo sapiens OX=9606 GN=POTEJ PE=3 SV=1; POTE ankyrin domain family member E OS=Homo sapiens OX=9606 GN=POTEE PE=2 SV=3; POTE ankyrin domain family member I OS=Homo sapiens OX=9606 GN=POTEI PE=3 SV=1	0	3	3	0.3885	0	1	1	1	972.127	972.127	2914.37	2914.36	3.28	0.00318	0/0	0	0	7.77246e+06	HCD	MS2	29.001	80.804	109.918	43048	43048	43046	220428_iNrich_HELA_MG132_Trypsin_05.raw	F12.5	NA	2026	2.96	2	FALSE	0.002135	0.01846	0.182
High	Sequest HT	Sequest HT (A5)	A	5	Unambiguous	DDTAVLVIDNGSGMCKAGFAGDDAPR	[D].dDTAVLVIDNGSGmckAGFAGDDAPR.[A]	4	A5A3E0; P0CG38	A5A3E0	POTE ankyrin domain family member F OS=Homo sapiens OX=9606 GN=POTEF PE=1 SV=2;POTE ankyrin domain family member I OS=Homo sapiens OX=9606 GN=POTEI PE=3 SV=1	A5A3E0; P0CG39; Q6S8J3; P0CG38	POTE ankyrin domain family member F OS=Homo sapiens OX=9606 GN=POTEF PE=1 SV=2; POTE ankyrin domain family member J OS=Homo sapiens OX=9606 GN=POTEJ PE=3 SV=1; POTE ankyrin domain family member E OS=Homo sapiens OX=9606 GN=POTEE PE=2 SV=3; POTE ankyrin domain family member I OS=Homo sapiens OX=9606 GN=POTEI PE=3 SV=1	0	3	0	0.5695	0	1	1	1	972.127	972.127	2914.37	2914.36	3.13	0.00304	0/0	0	0	408686	HCD	MS2	58.3797	120	111.365	43602	43602	43592	220428_iNrich_HELA_MG132_Trypsin_05.raw	F12.5	NA	2012	2.95	2	FALSE	0.0001901	0.001342	0.451
High	Sequest HT	Sequest HT (A5)	A	5	Unambiguous	DDTAVLVIDNGSGMCKAGFAGDDAPR	[D].dDTAVLVIDNGSGMckAGFAGDDAPR.[A]	4	A5A3E0; P0CG38	A5A3E0	POTE ankyrin domain family member F OS=Homo sapiens OX=9606 GN=POTEF PE=1 SV=2;POTE ankyrin domain family member I OS=Homo sapiens OX=9606 GN=POTEI PE=3 SV=1	A5A3E0; P0CG39; Q6S8J3; P0CG38	POTE ankyrin domain family member F OS=Homo sapiens OX=9606 GN=POTEF PE=1 SV=2; POTE ankyrin domain family member J OS=Homo sapiens OX=9606 GN=POTEJ PE=3 SV=1; POTE ankyrin domain family member E OS=Homo sapiens OX=9606 GN=POTEE PE=2 SV=3; POTE ankyrin domain family member I OS=Homo sapiens OX=9606 GN=POTEI PE=3 SV=1	0	3	0	0.6118	0	1	1	1	966.785	966.787	2898.34	2898.36	-7.84	-0.00757	0/0	0	0	2.18008e+06	HCD	MS2	75.7138	95.142	107.864	42415	42415	42409	220428_iNrich_HELA_MG132_Trypsin_06.raw	F12.6	NoneMonoisotopic	1692	4.74	2	FALSE	9.269e-06	2.235e-05	0.904
High	Sequest HT	Sequest HT (A5)	A	5	Selected	DDTAVLVIDNGSGMCKAGFAGDDAPR	[D].dDTAVLVIDNGSGmckAGFAGDDAPR.[A]	4	A5A3E0; P0CG38	A5A3E0	POTE ankyrin domain family member F OS=Homo sapiens OX=9606 GN=POTEF PE=1 SV=2;POTE ankyrin domain family member I OS=Homo sapiens OX=9606 GN=POTEI PE=3 SV=1	A5A3E0; P0CG39; Q6S8J3; P0CG38	POTE ankyrin domain family member F OS=Homo sapiens OX=9606 GN=POTEF PE=1 SV=2; POTE ankyrin domain family member J OS=Homo sapiens OX=9606 GN=POTEJ PE=3 SV=1; POTE ankyrin domain family member E OS=Homo sapiens OX=9606 GN=POTEE PE=2 SV=3; POTE ankyrin domain family member I OS=Homo sapiens OX=9606 GN=POTEI PE=3 SV=1	0	3	3	0.3587	0	1	1	1	972.128	972.131	2914.37	2914.36	4.35	0.00422	0/0	0	0	1.15458e+06	HCD	MS2	49.4258	116.056	107.9	42429	42429	42422	220428_iNrich_HELA_MG132_Trypsin_06.raw	F12.6	NA	2087	3.15	2	FALSE	0.005678	0.05415	0.063
High	Sequest HT	Sequest HT (A5)	A	5	Selected	DDTAVLVIDNGSGMCKAGFAGDDAPR	[D].dDTAVLVIDNGSGmckAGFAGDDAPR.[A]	4	A5A3E0; P0CG38	A5A3E0	POTE ankyrin domain family member F OS=Homo sapiens OX=9606 GN=POTEF PE=1 SV=2;POTE ankyrin domain family member I OS=Homo sapiens OX=9606 GN=POTEI PE=3 SV=1	A5A3E0; P0CG39; Q6S8J3; P0CG38	POTE ankyrin domain family member F OS=Homo sapiens OX=9606 GN=POTEF PE=1 SV=2; POTE ankyrin domain family member J OS=Homo sapiens OX=9606 GN=POTEJ PE=3 SV=1; POTE ankyrin domain family member E OS=Homo sapiens OX=9606 GN=POTEE PE=2 SV=3; POTE ankyrin domain family member I OS=Homo sapiens OX=9606 GN=POTEI PE=3 SV=1	0	3	3	0.4194	0	1	1	1	972.128	972.131	2914.37	2914.36	4.33	0.00421	0/0	0	0	1.23633e+06	HCD	MS2	39.3488	120	109.54	43080	43080	43072	220428_iNrich_HELA_MG132_Trypsin_06.raw	F12.6	NA	2086	3.1	2	FALSE	0.005972	0.05675	0.058
High	Sequest HT	Sequest HT (A5)	A	5	Unambiguous	DDTAVLVIDNGSGMCKAGFAGDDAPR	[D].dDTAVLVIDNGSGMckAGFAGDDAPR.[A]	4	A5A3E0; P0CG38	A5A3E0	POTE ankyrin domain family member F OS=Homo sapiens OX=9606 GN=POTEF PE=1 SV=2;POTE ankyrin domain family member I OS=Homo sapiens OX=9606 GN=POTEI PE=3 SV=1	A5A3E0; P0CG39; Q6S8J3; P0CG38	POTE ankyrin domain family member F OS=Homo sapiens OX=9606 GN=POTEF PE=1 SV=2; POTE ankyrin domain family member J OS=Homo sapiens OX=9606 GN=POTEJ PE=3 SV=1; POTE ankyrin domain family member E OS=Homo sapiens OX=9606 GN=POTEE PE=2 SV=3; POTE ankyrin domain family member I OS=Homo sapiens OX=9606 GN=POTEI PE=3 SV=1	0	3	0	0.5397	0	1	1	1	966.786	966.786	2898.34	2898.36	-6.62	-0.0064	0/0	0	0	644870	HCD	MS2	77.1679	120	109.482	43490	43490	43488	220428_iNrich_HELA_MG132_Trypsin_07.raw	F12.7	NoneMonoisotopic	1769	4.41	2	FALSE	0.0003882	0.003068	0.367
High	Sequest HT	Sequest HT (A5)	A	5	Unambiguous	DDTAVLVIDNGSGMCKAGFAGDDAPR	[D].dDTAVLVIDNGSGmckAGFAGDDAPR.[A]	4	A5A3E0; P0CG38	A5A3E0	POTE ankyrin domain family member F OS=Homo sapiens OX=9606 GN=POTEF PE=1 SV=2;POTE ankyrin domain family member I OS=Homo sapiens OX=9606 GN=POTEI PE=3 SV=1	A5A3E0; P0CG39; Q6S8J3; P0CG38	POTE ankyrin domain family member F OS=Homo sapiens OX=9606 GN=POTEF PE=1 SV=2; POTE ankyrin domain family member J OS=Homo sapiens OX=9606 GN=POTEJ PE=3 SV=1; POTE ankyrin domain family member E OS=Homo sapiens OX=9606 GN=POTEE PE=2 SV=3; POTE ankyrin domain family member I OS=Homo sapiens OX=9606 GN=POTEI PE=3 SV=1	0	3	3	0.4852	0	1	1	1	972.129	972.129	2914.37	2914.36	4.61	0.00448	0/0	0	0	405968	HCD	MS2	21.6955	120	109.569	43526	43526	43514	220428_iNrich_HELA_MG132_Trypsin_07.raw	F12.7	NA	2103	3.05	2	FALSE	0.002013	0.01765	0.188
High	Sequest HT	Sequest HT (A5)	A	5	Selected	DDTAVLVIDNGSGMCKAGFAGDDAPR	[D].dDTAVLVIDNGSGMckAGFAGDDAPR.[A]	4	A5A3E0; P0CG38	A5A3E0	POTE ankyrin domain family member F OS=Homo sapiens OX=9606 GN=POTEF PE=1 SV=2;POTE ankyrin domain family member I OS=Homo sapiens OX=9606 GN=POTEI PE=3 SV=1	A5A3E0; P0CG39; Q6S8J3; P0CG38	POTE ankyrin domain family member F OS=Homo sapiens OX=9606 GN=POTEF PE=1 SV=2; POTE ankyrin domain family member J OS=Homo sapiens OX=9606 GN=POTEJ PE=3 SV=1; POTE ankyrin domain family member E OS=Homo sapiens OX=9606 GN=POTEE PE=2 SV=3; POTE ankyrin domain family member I OS=Homo sapiens OX=9606 GN=POTEI PE=3 SV=1	0	3	0	0.4286	0	1	1	1	966.787	966.787	2898.35	2898.36	-5.23	-0.00506	0/0	0	0	678712	HCD	MS2	76.8558	120	111.257	44192	44192	44190	220428_iNrich_HELA_MG132_Trypsin_07.raw	F12.7	NoneMonoisotopic	1833	3.85	2	FALSE	0.0001901	0.001357	0.45
High	Sequest HT	Sequest HT (A5)	A	5	Unambiguous	DDTAVLVIDNGSGMCKAGFAGDDAPR	[D].dDTAVLVIDNGSGMckAGFAGDDAPR.[A]	4	A5A3E0; P0CG38	A5A3E0	POTE ankyrin domain family member F OS=Homo sapiens OX=9606 GN=POTEF PE=1 SV=2;POTE ankyrin domain family member I OS=Homo sapiens OX=9606 GN=POTEI PE=3 SV=1	A5A3E0; P0CG39; Q6S8J3; P0CG38	POTE ankyrin domain family member F OS=Homo sapiens OX=9606 GN=POTEF PE=1 SV=2; POTE ankyrin domain family member J OS=Homo sapiens OX=9606 GN=POTEJ PE=3 SV=1; POTE ankyrin domain family member E OS=Homo sapiens OX=9606 GN=POTEE PE=2 SV=3; POTE ankyrin domain family member I OS=Homo sapiens OX=9606 GN=POTEI PE=3 SV=1	0	3	3	0.6069	0	1	1	1	966.784	966.784	2898.34	2898.36	-8.94	-0.00863	0/0	0	0	585365	HCD	MS2	18.0329	120	113.162	44916	44916	44905	220428_iNrich_HELA_MG132_Trypsin_07.raw	F12.7	NA	1640	4.07	2	FALSE	7.115e-05	0.0003181	0.604
High	Sequest HT	Sequest HT (A5)	A	5	Unambiguous	DDTAVLVIDNGSGMCKAGFAGDDAPR	[D].dDTAVLVIDNGSGMckAGFAGDDAPR.[A]	4	A5A3E0; P0CG38	A5A3E0	POTE ankyrin domain family member F OS=Homo sapiens OX=9606 GN=POTEF PE=1 SV=2;POTE ankyrin domain family member I OS=Homo sapiens OX=9606 GN=POTEI PE=3 SV=1	A5A3E0; P0CG39; Q6S8J3; P0CG38	POTE ankyrin domain family member F OS=Homo sapiens OX=9606 GN=POTEF PE=1 SV=2; POTE ankyrin domain family member J OS=Homo sapiens OX=9606 GN=POTEJ PE=3 SV=1; POTE ankyrin domain family member E OS=Homo sapiens OX=9606 GN=POTEE PE=2 SV=3; POTE ankyrin domain family member I OS=Homo sapiens OX=9606 GN=POTEI PE=3 SV=1	0	3	3	0.5973	0	1	1	1	966.784	966.784	2898.34	2898.36	-8.39	-0.00811	0/0	0	0	66783.1	HCD	MS2	53.4649	120	114.593	45473	45473	45464	220428_iNrich_HELA_MG132_Trypsin_07.raw	F12.7	NA	1684	2.98	2	FALSE	0.001464	0.01306	0.22
High	Sequest HT	Sequest HT (A5)	A	5	Selected	DDTAVLVIDNGSGMCKAGFAGDDAPR	[D].dDTAVLVIDNGSGmckAGFAGDDAPR.[A]	4	A5A3E0; P0CG38	A5A3E0	POTE ankyrin domain family member F OS=Homo sapiens OX=9606 GN=POTEF PE=1 SV=2;POTE ankyrin domain family member I OS=Homo sapiens OX=9606 GN=POTEI PE=3 SV=1	A5A3E0; P0CG39; Q6S8J3; P0CG38	POTE ankyrin domain family member F OS=Homo sapiens OX=9606 GN=POTEF PE=1 SV=2; POTE ankyrin domain family member J OS=Homo sapiens OX=9606 GN=POTEJ PE=3 SV=1; POTE ankyrin domain family member E OS=Homo sapiens OX=9606 GN=POTEE PE=2 SV=3; POTE ankyrin domain family member I OS=Homo sapiens OX=9606 GN=POTEI PE=3 SV=1	0	3	0	0.497	0	1	1	1	972.12	972.12	2914.34	2914.36	-4.44	-0.00431	0/0	0	0	655885	HCD	MS2	85.7538	120	108.862	43028	43028	43020	220428_iNrich_HELA_MG132_Trypsin_08.raw	F12.8	NoneMonoisotopic	1622	3.38	2	FALSE	0.000182	0.00126	0.458
High	Sequest HT	Sequest HT (A5)	A	5	Selected	DDTAVLVIDNGSGMCKAGFAGDDAPR	[D].dDTAVLVIDNGSGmckAGFAGDDAPR.[A]	4	A5A3E0; P0CG38	A5A3E0	POTE ankyrin domain family member F OS=Homo sapiens OX=9606 GN=POTEF PE=1 SV=2;POTE ankyrin domain family member I OS=Homo sapiens OX=9606 GN=POTEI PE=3 SV=1	A5A3E0; P0CG39; Q6S8J3; P0CG38	POTE ankyrin domain family member F OS=Homo sapiens OX=9606 GN=POTEF PE=1 SV=2; POTE ankyrin domain family member J OS=Homo sapiens OX=9606 GN=POTEJ PE=3 SV=1; POTE ankyrin domain family member E OS=Homo sapiens OX=9606 GN=POTEE PE=2 SV=3; POTE ankyrin domain family member I OS=Homo sapiens OX=9606 GN=POTEI PE=3 SV=1	0	3	3	0.5212	0	1	1	1	972.125	972.125	2914.36	2914.36	0.5	0.00048	0/0	0	0	238597	HCD	MS2	12.6157	120	109.74	43368	43368	43358	220428_iNrich_HELA_MG132_Trypsin_08.raw	F12.8	NA	1867	3.07	2	FALSE	0.0005157	0.004627	0.326
High	Sequest HT	Sequest HT (A5)	A	5	Selected	DDTAVLVIDNGSGMCKAGFAGDDAPR	[D].dDTAVLVIDNGSGMckAGFAGDDAPR.[A]	4	A5A3E0; P0CG38	A5A3E0	POTE ankyrin domain family member F OS=Homo sapiens OX=9606 GN=POTEF PE=1 SV=2;POTE ankyrin domain family member I OS=Homo sapiens OX=9606 GN=POTEI PE=3 SV=1	A5A3E0; P0CG39; Q6S8J3; P0CG38	POTE ankyrin domain family member F OS=Homo sapiens OX=9606 GN=POTEF PE=1 SV=2; POTE ankyrin domain family member J OS=Homo sapiens OX=9606 GN=POTEJ PE=3 SV=1; POTE ankyrin domain family member E OS=Homo sapiens OX=9606 GN=POTEE PE=2 SV=3; POTE ankyrin domain family member I OS=Homo sapiens OX=9606 GN=POTEI PE=3 SV=1	0	3	0	0.4466	0	1	1	1	966.786	966.786	2898.34	2898.36	-6.2	-0.00599	0/0	0	0	581352	HCD	MS2	81.7411	120	111.203	43926	43926	43917	220428_iNrich_HELA_MG132_Trypsin_08.raw	F12.8	NA	1809	4.21	2	FALSE	9.269e-06	5.353e-06	1.06
High	Sequest HT	Sequest HT (A5)	A	5	Unambiguous	DDTAVLVIDNGSGMCKAGFAGDDAPR	[D].dDTAVLVIDNGSGmckAGFAGDDAPR.[A]	4	A5A3E0; P0CG38	A5A3E0	POTE ankyrin domain family member F OS=Homo sapiens OX=9606 GN=POTEF PE=1 SV=2;POTE ankyrin domain family member I OS=Homo sapiens OX=9606 GN=POTEI PE=3 SV=1	A5A3E0; P0CG39; Q6S8J3; P0CG38	POTE ankyrin domain family member F OS=Homo sapiens OX=9606 GN=POTEF PE=1 SV=2; POTE ankyrin domain family member J OS=Homo sapiens OX=9606 GN=POTEJ PE=3 SV=1; POTE ankyrin domain family member E OS=Homo sapiens OX=9606 GN=POTEE PE=2 SV=3; POTE ankyrin domain family member I OS=Homo sapiens OX=9606 GN=POTEI PE=3 SV=1	0	3	3	0.5	0	1	1	1	972.132	972.132	2914.38	2914.36	8.51	0.00827	0/0	0	0	258409	HCD	MS2	15.1798	120	111.38	43994	43994	43982	220428_iNrich_HELA_MG132_Trypsin_08.raw	F12.8	NA	2328	2.82	2	FALSE	0.004639	0.04228	0.09
High	Sequest HT	Sequest HT (A5)	A	5	Unambiguous	DDTAVLVIDNGSGMCKAGFAGDDAPR	[D].dDTAVLVIDNGSGmckAGFAGDDAPR.[A]	4	A5A3E0; P0CG38	A5A3E0	POTE ankyrin domain family member F OS=Homo sapiens OX=9606 GN=POTEF PE=1 SV=2;POTE ankyrin domain family member I OS=Homo sapiens OX=9606 GN=POTEI PE=3 SV=1	A5A3E0; P0CG39; Q6S8J3; P0CG38	POTE ankyrin domain family member F OS=Homo sapiens OX=9606 GN=POTEF PE=1 SV=2; POTE ankyrin domain family member J OS=Homo sapiens OX=9606 GN=POTEJ PE=3 SV=1; POTE ankyrin domain family member E OS=Homo sapiens OX=9606 GN=POTEE PE=2 SV=3; POTE ankyrin domain family member I OS=Homo sapiens OX=9606 GN=POTEI PE=3 SV=1	0	3	3	0.5228	0	1	1	1	972.119	972.119	2914.34	2914.36	-5.58	-0.00542	0/0	0	0	93416.6	HCD	MS2	43.361	120	114.03	45020	45020	45009	220428_iNrich_HELA_MG132_Trypsin_08.raw	F12.8	NoneMonoisotopic	1560	2.41	2	FALSE	0.0003987	0.003334	0.359
High	Sequest HT	Sequest HT (A5)	A	5	Unambiguous	DDTAVLVIDNGSGMCKAGFAGDDAPR	[D].dDTAVLVIDNGSGmckAGFAGDDAPR.[A]	4	A5A3E0; P0CG38	A5A3E0	POTE ankyrin domain family member F OS=Homo sapiens OX=9606 GN=POTEF PE=1 SV=2;POTE ankyrin domain family member I OS=Homo sapiens OX=9606 GN=POTEI PE=3 SV=1	A5A3E0; P0CG39; Q6S8J3; P0CG38	POTE ankyrin domain family member F OS=Homo sapiens OX=9606 GN=POTEF PE=1 SV=2; POTE ankyrin domain family member J OS=Homo sapiens OX=9606 GN=POTEJ PE=3 SV=1; POTE ankyrin domain family member E OS=Homo sapiens OX=9606 GN=POTEE PE=2 SV=3; POTE ankyrin domain family member I OS=Homo sapiens OX=9606 GN=POTEI PE=3 SV=1	0	3	0	0.4842	0	1	1	1	972.119	972.119	2914.34	2914.36	-4.85	-0.00471	0/0	0	0	246807	HCD	MS2	78.6423	120	117.016	46162	46162	46153	220428_iNrich_HELA_MG132_Trypsin_08.raw	F12.8	NoneMonoisotopic	1606	3.16	2	FALSE	0.001266	0.01119	0.237
High	Sequest HT	Sequest HT (A5)	A	5	Selected	DDTAVLVIDNGSGMCKAGFAGDDAPR	[D].dDTAVLVIDNGSGmckAGFAGDDAPR.[A]	4	A5A3E0; P0CG38	A5A3E0	POTE ankyrin domain family member F OS=Homo sapiens OX=9606 GN=POTEF PE=1 SV=2;POTE ankyrin domain family member I OS=Homo sapiens OX=9606 GN=POTEI PE=3 SV=1	A5A3E0; P0CG39; Q6S8J3; P0CG38	POTE ankyrin domain family member F OS=Homo sapiens OX=9606 GN=POTEF PE=1 SV=2; POTE ankyrin domain family member J OS=Homo sapiens OX=9606 GN=POTEJ PE=3 SV=1; POTE ankyrin domain family member E OS=Homo sapiens OX=9606 GN=POTEE PE=2 SV=3; POTE ankyrin domain family member I OS=Homo sapiens OX=9606 GN=POTEI PE=3 SV=1	0	3	3	0.4498	0	1	1	1	972.127	972.127	2914.37	2914.36	3.29	0.0032	0/0	0	0	409193	HCD	MS2	28.5667	120	114.674	45562	45562	45555	220428_iNrich_HELA_MG132_Trypsin_09.raw	F12.9	NA	2026	2.89	2	FALSE	0.004085	0.03642	0.106
High	Sequest HT	Sequest HT (A5)	A	5	Selected	DDTAVLVIDNGSGMCKAGFAGDDAPR	[D].dDTAVLVIDNGSGmckAGFAGDDAPR.[A]	4	A5A3E0; P0CG38	A5A3E0	POTE ankyrin domain family member F OS=Homo sapiens OX=9606 GN=POTEF PE=1 SV=2;POTE ankyrin domain family member I OS=Homo sapiens OX=9606 GN=POTEI PE=3 SV=1	A5A3E0; P0CG39; Q6S8J3; P0CG38	POTE ankyrin domain family member F OS=Homo sapiens OX=9606 GN=POTEF PE=1 SV=2; POTE ankyrin domain family member J OS=Homo sapiens OX=9606 GN=POTEJ PE=3 SV=1; POTE ankyrin domain family member E OS=Homo sapiens OX=9606 GN=POTEE PE=2 SV=3; POTE ankyrin domain family member I OS=Homo sapiens OX=9606 GN=POTEI PE=3 SV=1	0	3	3	0.5048	0	1	1	1	972.118	972.118	2914.34	2914.36	-5.93	-0.00576	0/0	0	0	200041	HCD	MS2	13.6578	120	109.686	41927	41927	41915	220428_iNrich_HELA_MG132_Trypsin_10.raw	F12.10	NA	1542	3.15	2	FALSE	0.0004267	0.00377	0.347
High	Sequest HT	Sequest HT (A5)	A	5	Unambiguous	DDTAVLVIDNGSGMCKAGFAGDDAPR	[D].dDTAVLVIDNGSGMckAGFAGDDAPR.[A]	4	A5A3E0; P0CG38	A5A3E0	POTE ankyrin domain family member F OS=Homo sapiens OX=9606 GN=POTEF PE=1 SV=2;POTE ankyrin domain family member I OS=Homo sapiens OX=9606 GN=POTEI PE=3 SV=1	A5A3E0; P0CG39; Q6S8J3; P0CG38	POTE ankyrin domain family member F OS=Homo sapiens OX=9606 GN=POTEF PE=1 SV=2; POTE ankyrin domain family member J OS=Homo sapiens OX=9606 GN=POTEJ PE=3 SV=1; POTE ankyrin domain family member E OS=Homo sapiens OX=9606 GN=POTEE PE=2 SV=3; POTE ankyrin domain family member I OS=Homo sapiens OX=9606 GN=POTEI PE=3 SV=1	0	3	3	0.5552	0	1	1	1	966.785	966.785	2898.34	2898.36	-8.17	-0.00789	0/0	0	0	227342	HCD	MS2	39.4659	120	113.19	43265	43265	43254	220428_iNrich_HELA_MG132_Trypsin_10.raw	F12.10	NA	1695	3.44	2	FALSE	0.002121	0.01842	0.183
High	Sequest HT	Sequest HT (A5)	A	5	Unambiguous	DDTAVLVIDNGSGMCKAGFAGDDAPR	[D].dDTAVLVIDNGSGmckAGFAGDDAPR.[A]	4	A5A3E0; P0CG38	A5A3E0	POTE ankyrin domain family member F OS=Homo sapiens OX=9606 GN=POTEF PE=1 SV=2;POTE ankyrin domain family member I OS=Homo sapiens OX=9606 GN=POTEI PE=3 SV=1	A5A3E0; P0CG39; Q6S8J3; P0CG38	POTE ankyrin domain family member F OS=Homo sapiens OX=9606 GN=POTEF PE=1 SV=2; POTE ankyrin domain family member J OS=Homo sapiens OX=9606 GN=POTEJ PE=3 SV=1; POTE ankyrin domain family member E OS=Homo sapiens OX=9606 GN=POTEE PE=2 SV=3; POTE ankyrin domain family member I OS=Homo sapiens OX=9606 GN=POTEI PE=3 SV=1	0	3	0	0.3962	0	1	1	1	972.126	972.126	2914.36	2914.36	2.41	0.00234	0/0	0	0	197610	HCD	MS2	78.0988	120	113.953	43551	43551	43540	220428_iNrich_HELA_MG132_Trypsin_10.raw	F12.10	NA	1971	2.65	2	FALSE	0.0003882	0.003068	0.367
High	Sequest HT	Sequest HT (A5)	A	5	Selected	DDTAVLVIDNGSGMCKAGFAGDDAPR	[D].dDTAVLVIDNGSGmckAGFAGDDAPR.[A]	4	A5A3E0; P0CG38	A5A3E0	POTE ankyrin domain family member F OS=Homo sapiens OX=9606 GN=POTEF PE=1 SV=2;POTE ankyrin domain family member I OS=Homo sapiens OX=9606 GN=POTEI PE=3 SV=1	A5A3E0; P0CG39; Q6S8J3; P0CG38	POTE ankyrin domain family member F OS=Homo sapiens OX=9606 GN=POTEF PE=1 SV=2; POTE ankyrin domain family member J OS=Homo sapiens OX=9606 GN=POTEJ PE=3 SV=1; POTE ankyrin domain family member E OS=Homo sapiens OX=9606 GN=POTEE PE=2 SV=3; POTE ankyrin domain family member I OS=Homo sapiens OX=9606 GN=POTEI PE=3 SV=1	0	3	3	0.3754	0	1	1	1	972.127	972.127	2914.37	2914.36	3.32	0.00322	0/0	0	0	829527	HCD	MS2	31.8391	120	114.152	43624	43624	43618	220428_iNrich_HELA_MG132_Trypsin_10.raw	F12.10	NA	2025	2.85	2	FALSE	0.001601	0.01424	0.211
High	Sequest HT	Sequest HT (A5)	A	5	Selected	DDTAVLVIDNGSGMCKAGFAGDDAPR	[D].dDTAVLVIDNGSGMckAGFAGDDAPR.[A]	4	A5A3E0; P0CG38	A5A3E0	POTE ankyrin domain family member F OS=Homo sapiens OX=9606 GN=POTEF PE=1 SV=2;POTE ankyrin domain family member I OS=Homo sapiens OX=9606 GN=POTEI PE=3 SV=1	A5A3E0; P0CG39; Q6S8J3; P0CG38	POTE ankyrin domain family member F OS=Homo sapiens OX=9606 GN=POTEF PE=1 SV=2; POTE ankyrin domain family member J OS=Homo sapiens OX=9606 GN=POTEJ PE=3 SV=1; POTE ankyrin domain family member E OS=Homo sapiens OX=9606 GN=POTEE PE=2 SV=3; POTE ankyrin domain family member I OS=Homo sapiens OX=9606 GN=POTEI PE=3 SV=1	0	2	0	0.6937	0	1	1	1	1449.68	1449.68	2898.35	2898.36	-5.27	-0.00764	0/0	0	0	1.49947e+06	HCD	MS2	71.2472	120	114.332	43692	43692	43683	220428_iNrich_HELA_MG132_Trypsin_10.raw	F12.10	NA	1829	4.93	2	FALSE	9.269e-06	7.813e-09	1.772
High	Sequest HT	Sequest HT (A5)	A	5	Selected	DDTAVLVIDNGSGMCKAGFAGDDAPR	[D].dDTAVLVIDNGSGmckAGFAGDDAPR.[A]	4	A5A3E0; P0CG38	A5A3E0	POTE ankyrin domain family member F OS=Homo sapiens OX=9606 GN=POTEF PE=1 SV=2;POTE ankyrin domain family member I OS=Homo sapiens OX=9606 GN=POTEI PE=3 SV=1	A5A3E0; P0CG39; Q6S8J3; P0CG38	POTE ankyrin domain family member F OS=Homo sapiens OX=9606 GN=POTEF PE=1 SV=2; POTE ankyrin domain family member J OS=Homo sapiens OX=9606 GN=POTEJ PE=3 SV=1; POTE ankyrin domain family member E OS=Homo sapiens OX=9606 GN=POTEE PE=2 SV=3; POTE ankyrin domain family member I OS=Homo sapiens OX=9606 GN=POTEI PE=3 SV=1	0	3	3	0.4138	0	1	1	1	972.128	972.128	2914.37	2914.36	3.83	0.00372	0/0	0	0	2721561	HCD	MS2	9.04553	43.293	114.484	43749	43749	43748	220428_iNrich_HELA_MG132_Trypsin_10.raw	F12.10	NA	2068	3.19	2	FALSE	0.007046	0.06758	0.04
High	Sequest HT	Sequest HT (A5)	A	5	Unambiguous	DDTAVLVIDNGSGMCKAGFAGDDAPR	[D].dDTAVLVIDNGSGmckAGFAGDDAPR.[A]	4	A5A3E0; P0CG38	A5A3E0	POTE ankyrin domain family member F OS=Homo sapiens OX=9606 GN=POTEF PE=1 SV=2;POTE ankyrin domain family member I OS=Homo sapiens OX=9606 GN=POTEI PE=3 SV=1	A5A3E0; P0CG39; Q6S8J3; P0CG38	POTE ankyrin domain family member F OS=Homo sapiens OX=9606 GN=POTEF PE=1 SV=2; POTE ankyrin domain family member J OS=Homo sapiens OX=9606 GN=POTEJ PE=3 SV=1; POTE ankyrin domain family member E OS=Homo sapiens OX=9606 GN=POTEE PE=2 SV=3; POTE ankyrin domain family member I OS=Homo sapiens OX=9606 GN=POTEI PE=3 SV=1	0	3	3	0.567	0	1	1	1	972.12	972.12	2914.35	2914.36	-4.3	-0.00418	0/0	0	0	245763	HCD	MS2	67.2321	120	110.358	41474	41474	41473	220428_iNrich_HELA_MG132_Trypsin_11.raw	F12.11	NA	1619	2.91	2	FALSE	0.000406	0.003513	0.354
High	Sequest HT	Sequest HT (A5)	A	5	Unambiguous	DDTAVLVIDNGSGMCKAGFAGDDAPR	[D].dDTAVLVIDNGSGmckAGFAGDDAPR.[A]	4	A5A3E0; P0CG38	A5A3E0	POTE ankyrin domain family member F OS=Homo sapiens OX=9606 GN=POTEF PE=1 SV=2;POTE ankyrin domain family member I OS=Homo sapiens OX=9606 GN=POTEI PE=3 SV=1	A5A3E0; P0CG39; Q6S8J3; P0CG38	POTE ankyrin domain family member F OS=Homo sapiens OX=9606 GN=POTEF PE=1 SV=2; POTE ankyrin domain family member J OS=Homo sapiens OX=9606 GN=POTEJ PE=3 SV=1; POTE ankyrin domain family member E OS=Homo sapiens OX=9606 GN=POTEE PE=2 SV=3; POTE ankyrin domain family member I OS=Homo sapiens OX=9606 GN=POTEI PE=3 SV=1	0	3	0	0.4434	0	1	1	1	972.122	972.122	2914.35	2914.36	-2.31	-0.00224	0/0	0	0	407601	HCD	MS2	79.4638	120	112.257	42186	42186	42175	220428_iNrich_HELA_MG132_Trypsin_11.raw	F12.11	NA	1711	3.09	2	FALSE	0.0008401	0.007346	0.28
High	Sequest HT	Sequest HT (A5)	A	5	Selected	DDTAVLVIDNGSGMCKAGFAGDDAPR	[D].dDTAVLVIDNGSGmckAGFAGDDAPR.[A]	4	A5A3E0; P0CG38	A5A3E0	POTE ankyrin domain family member F OS=Homo sapiens OX=9606 GN=POTEF PE=1 SV=2;POTE ankyrin domain family member I OS=Homo sapiens OX=9606 GN=POTEI PE=3 SV=1	A5A3E0; P0CG39; Q6S8J3; P0CG38	POTE ankyrin domain family member F OS=Homo sapiens OX=9606 GN=POTEF PE=1 SV=2; POTE ankyrin domain family member J OS=Homo sapiens OX=9606 GN=POTEJ PE=3 SV=1; POTE ankyrin domain family member E OS=Homo sapiens OX=9606 GN=POTEE PE=2 SV=3; POTE ankyrin domain family member I OS=Homo sapiens OX=9606 GN=POTEI PE=3 SV=1	0	3	3	0.4183	0	1	1	1	972.128	972.128	2914.37	2914.36	3.97	0.00385	0/0	0	0	646811	HCD	MS2	9.66937	120	114.26	42932	42932	42929	220428_iNrich_HELA_MG132_Trypsin_11.raw	F12.11	NA	2063	3.06	2	FALSE	0.007005	0.06723	0.041
High	Sequest HT	Sequest HT (A5)	A	5	Selected	DDTAVLVIDNGSGMCKAGFAGDDAPR	[D].dDTAVLVIDNGSGmckAGFAGDDAPR.[A]	4	A5A3E0; P0CG38	A5A3E0	POTE ankyrin domain family member F OS=Homo sapiens OX=9606 GN=POTEF PE=1 SV=2;POTE ankyrin domain family member I OS=Homo sapiens OX=9606 GN=POTEI PE=3 SV=1	A5A3E0; P0CG39; Q6S8J3; P0CG38	POTE ankyrin domain family member F OS=Homo sapiens OX=9606 GN=POTEF PE=1 SV=2; POTE ankyrin domain family member J OS=Homo sapiens OX=9606 GN=POTEJ PE=3 SV=1; POTE ankyrin domain family member E OS=Homo sapiens OX=9606 GN=POTEE PE=2 SV=3; POTE ankyrin domain family member I OS=Homo sapiens OX=9606 GN=POTEI PE=3 SV=1	0	3	3	0.3954	0	1	1	1	972.129	972.129	2914.37	2914.36	5.47	0.00531	0/0	0	0	1.12177e+06	HCD	MS2	37.933	120	114.318	42954	42954	42942	220428_iNrich_HELA_MG132_Trypsin_11.raw	F12.11	NA	2140	3.06	2	FALSE	0.003231	0.02834	0.134
High	Sequest HT	Sequest HT (A5)	A	5	Unambiguous	DDTAVLVIDNGSGMCKAGFAGDDAPR	[D].dDTAVLVIDNGSGMckAGFAGDDAPR.[A]	4	A5A3E0; P0CG38	A5A3E0	POTE ankyrin domain family member F OS=Homo sapiens OX=9606 GN=POTEF PE=1 SV=2;POTE ankyrin domain family member I OS=Homo sapiens OX=9606 GN=POTEI PE=3 SV=1	A5A3E0; P0CG39; Q6S8J3; P0CG38	POTE ankyrin domain family member F OS=Homo sapiens OX=9606 GN=POTEF PE=1 SV=2; POTE ankyrin domain family member J OS=Homo sapiens OX=9606 GN=POTEJ PE=3 SV=1; POTE ankyrin domain family member E OS=Homo sapiens OX=9606 GN=POTEE PE=2 SV=3; POTE ankyrin domain family member I OS=Homo sapiens OX=9606 GN=POTEI PE=3 SV=1	0	3	3	0.5818	0	1	1	1	966.788	966.788	2898.35	2898.36	-4.48	-0.00433	0/0	0	0	484402	HCD	MS2	43.1419	120	114.907	43177	43177	43176	220428_iNrich_HELA_MG132_Trypsin_11.raw	F12.11	NoneMonoisotopic	1871	3.73	2	FALSE	9.269e-06	1.397e-06	1.207
High	Sequest HT	Sequest HT (A5)	A	5	Unambiguous	DDTAVLVIDNGSGMCKAGFAGDDAPR	[D].dDTAVLVIDNGSGmckAGFAGDDAPR.[A]	4	A5A3E0; P0CG38	A5A3E0	POTE ankyrin domain family member F OS=Homo sapiens OX=9606 GN=POTEF PE=1 SV=2;POTE ankyrin domain family member I OS=Homo sapiens OX=9606 GN=POTEI PE=3 SV=1	A5A3E0; P0CG39; Q6S8J3; P0CG38	POTE ankyrin domain family member F OS=Homo sapiens OX=9606 GN=POTEF PE=1 SV=2; POTE ankyrin domain family member J OS=Homo sapiens OX=9606 GN=POTEJ PE=3 SV=1; POTE ankyrin domain family member E OS=Homo sapiens OX=9606 GN=POTEE PE=2 SV=3; POTE ankyrin domain family member I OS=Homo sapiens OX=9606 GN=POTEI PE=3 SV=1	0	3	3	0.4689	0	1	1	1	972.127	972.127	2914.37	2914.36	3.25	0.00315	0/0	0	0	454149	HCD	MS2	21.5312	120	115.436	43373	43373	43371	220428_iNrich_HELA_MG132_Trypsin_11.raw	F12.11	NA	2002	2.73	2	FALSE	0.002497	0.02214	0.162
High	Sequest HT	Sequest HT (A5)	A	5	Unambiguous	DDTAVLVIDNGSGMCKAGFAGDDAPR	[D].dDTAVLVIDNGSGmckAGFAGDDAPR.[A]	4	A5A3E0; P0CG38	A5A3E0	POTE ankyrin domain family member F OS=Homo sapiens OX=9606 GN=POTEF PE=1 SV=2;POTE ankyrin domain family member I OS=Homo sapiens OX=9606 GN=POTEI PE=3 SV=1	A5A3E0; P0CG39; Q6S8J3; P0CG38	POTE ankyrin domain family member F OS=Homo sapiens OX=9606 GN=POTEF PE=1 SV=2; POTE ankyrin domain family member J OS=Homo sapiens OX=9606 GN=POTEJ PE=3 SV=1; POTE ankyrin domain family member E OS=Homo sapiens OX=9606 GN=POTEE PE=2 SV=3; POTE ankyrin domain family member I OS=Homo sapiens OX=9606 GN=POTEI PE=3 SV=1	0	3	3	0.5665	0	1	1	1	972.115	972.115	2914.33	2914.36	-8.92	-0.00867	0/0	0	0	1.13047e+06	HCD	MS2	17.0965	120	107.965	40916	40916	40914	220428_iNrich_HELA_MG132_Trypsin_12.raw	F12.12	NA	1441	3.46	2	FALSE	0.001464	0.01301	0.221
High	Sequest HT	Sequest HT (A5)	A	5	Selected	DDTAVLVIDNGSGMCKAGFAGDDAPR	[D].dDTAVLVIDNGSGmckAGFAGDDAPR.[A]	4	A5A3E0; P0CG38	A5A3E0	POTE ankyrin domain family member F OS=Homo sapiens OX=9606 GN=POTEF PE=1 SV=2;POTE ankyrin domain family member I OS=Homo sapiens OX=9606 GN=POTEI PE=3 SV=1	A5A3E0; P0CG39; Q6S8J3; P0CG38	POTE ankyrin domain family member F OS=Homo sapiens OX=9606 GN=POTEF PE=1 SV=2; POTE ankyrin domain family member J OS=Homo sapiens OX=9606 GN=POTEJ PE=3 SV=1; POTE ankyrin domain family member E OS=Homo sapiens OX=9606 GN=POTEE PE=2 SV=3; POTE ankyrin domain family member I OS=Homo sapiens OX=9606 GN=POTEI PE=3 SV=1	0	3	3	0.5367	0	1	1	1	972.121	972.121	2914.35	2914.36	-2.75	-0.00267	0/0	0	0	198350	HCD	MS2	16.1777	120	108.639	41173	41173	41161	220428_iNrich_HELA_MG132_Trypsin_12.raw	F12.12	NoneMonoisotopic	1696	3	2	FALSE	9.516e-05	0.0005202	0.55
High	Sequest HT	Sequest HT (A5)	A	5	Selected	DDTAVLVIDNGSGMCKAGFAGDDAPR	[D].dDTAVLVIDNGSGmckAGFAGDDAPR.[A]	4	A5A3E0; P0CG38	A5A3E0	POTE ankyrin domain family member F OS=Homo sapiens OX=9606 GN=POTEF PE=1 SV=2;POTE ankyrin domain family member I OS=Homo sapiens OX=9606 GN=POTEI PE=3 SV=1	A5A3E0; P0CG39; Q6S8J3; P0CG38	POTE ankyrin domain family member F OS=Homo sapiens OX=9606 GN=POTEF PE=1 SV=2; POTE ankyrin domain family member J OS=Homo sapiens OX=9606 GN=POTEJ PE=3 SV=1; POTE ankyrin domain family member E OS=Homo sapiens OX=9606 GN=POTEE PE=2 SV=3; POTE ankyrin domain family member I OS=Homo sapiens OX=9606 GN=POTEI PE=3 SV=1	0	3	3	0.3898	0	1	1	1	972.128	972.128	2914.37	2914.36	4.07	0.00395	0/0	0	0	583477	HCD	MS2	11.9646	120	112.339	42555	42555	42552	220428_iNrich_HELA_MG132_Trypsin_12.raw	F12.12	NA	2084	3.13	2	FALSE	0.007163	0.06872	0.038
High	Sequest HT	Sequest HT (A5)	A	5	Selected	DDTAVLVIDNGSGMCKAGFAGDDAPR	[D].dDTAVLVIDNGSGmckAGFAGDDAPR.[A]	4	A5A3E0; P0CG38	A5A3E0	POTE ankyrin domain family member F OS=Homo sapiens OX=9606 GN=POTEF PE=1 SV=2;POTE ankyrin domain family member I OS=Homo sapiens OX=9606 GN=POTEI PE=3 SV=1	A5A3E0; P0CG39; Q6S8J3; P0CG38	POTE ankyrin domain family member F OS=Homo sapiens OX=9606 GN=POTEF PE=1 SV=2; POTE ankyrin domain family member J OS=Homo sapiens OX=9606 GN=POTEJ PE=3 SV=1; POTE ankyrin domain family member E OS=Homo sapiens OX=9606 GN=POTEE PE=2 SV=3; POTE ankyrin domain family member I OS=Homo sapiens OX=9606 GN=POTEI PE=3 SV=1	0	3	3	0.4367	0	1	1	1	972.127	972.127	2914.37	2914.36	3.46	0.00336	0/0	0	0	13187505	HCD	MS2	34.4855	37.035	112.481	42610	42610	42604	220428_iNrich_HELA_MG132_Trypsin_12.raw	F12.12	NA	2041	3.32	2	FALSE	0.003956	0.035	0.11
High	Sequest HT	Sequest HT (A5)	A	5	Selected	DDTAVLVIDNGSGMCKAGFAGDDAPR	[D].dDTAVLVIDNGSGMckAGFAGDDAPR.[A]	4	A5A3E0; P0CG38	A5A3E0	POTE ankyrin domain family member F OS=Homo sapiens OX=9606 GN=POTEF PE=1 SV=2;POTE ankyrin domain family member I OS=Homo sapiens OX=9606 GN=POTEI PE=3 SV=1	A5A3E0; P0CG39; Q6S8J3; P0CG38	POTE ankyrin domain family member F OS=Homo sapiens OX=9606 GN=POTEF PE=1 SV=2; POTE ankyrin domain family member J OS=Homo sapiens OX=9606 GN=POTEJ PE=3 SV=1; POTE ankyrin domain family member E OS=Homo sapiens OX=9606 GN=POTEE PE=2 SV=3; POTE ankyrin domain family member I OS=Homo sapiens OX=9606 GN=POTEI PE=3 SV=1	0	2	0	0.6269	0	1	1	1	1449.68	1449.68	2898.35	2898.36	-5.04	-0.0073	0/0	0	0	3044620	HCD	MS2	71.0692	120	112.484	42611	42611	42604	220428_iNrich_HELA_MG132_Trypsin_12.raw	F12.12	NA	1856	4.69	2	FALSE	9.269e-06	3.115e-08	1.621
High	Sequest HT	Sequest HT (A5)	A	5	Unambiguous	DDTAVLVIDNGSGMCKAGFAGDDAPR	[D].dDTAVLVIDNGSGmckAGFAGDDAPR.[A]	4	A5A3E0; P0CG38	A5A3E0	POTE ankyrin domain family member F OS=Homo sapiens OX=9606 GN=POTEF PE=1 SV=2;POTE ankyrin domain family member I OS=Homo sapiens OX=9606 GN=POTEI PE=3 SV=1	A5A3E0; P0CG39; Q6S8J3; P0CG38	POTE ankyrin domain family member F OS=Homo sapiens OX=9606 GN=POTEF PE=1 SV=2; POTE ankyrin domain family member J OS=Homo sapiens OX=9606 GN=POTEJ PE=3 SV=1; POTE ankyrin domain family member E OS=Homo sapiens OX=9606 GN=POTEE PE=2 SV=3; POTE ankyrin domain family member I OS=Homo sapiens OX=9606 GN=POTEI PE=3 SV=1	0	2	2	0.6091	0	1	1	1	1457.68	1457.68	2914.34	2914.36	-4.68	-0.00682	0/0	0	0	344847	HCD	MS2	0	120	112.606	42658	42658	42656	220428_iNrich_HELA_MG132_Trypsin_12.raw	F12.12	NA	1608	2.43	2	FALSE	0.00155	0.01376	0.215
High	Sequest HT	Sequest HT (A5)	A	5	Selected	DDTAVLVIDNGSGMCKAGFAGDDAPR	[D].dDTAVLVIDNGSGmckAGFAGDDAPR.[A]	4	A5A3E0; P0CG38	A5A3E0	POTE ankyrin domain family member F OS=Homo sapiens OX=9606 GN=POTEF PE=1 SV=2;POTE ankyrin domain family member I OS=Homo sapiens OX=9606 GN=POTEI PE=3 SV=1	A5A3E0; P0CG39; Q6S8J3; P0CG38	POTE ankyrin domain family member F OS=Homo sapiens OX=9606 GN=POTEF PE=1 SV=2; POTE ankyrin domain family member J OS=Homo sapiens OX=9606 GN=POTEJ PE=3 SV=1; POTE ankyrin domain family member E OS=Homo sapiens OX=9606 GN=POTEE PE=2 SV=3; POTE ankyrin domain family member I OS=Homo sapiens OX=9606 GN=POTEI PE=3 SV=1	0	3	3	0.3559	0	1	1	1	972.129	972.129	2914.37	2914.36	5.19	0.00504	0/0	0	0	2.15404e+06	HCD	MS2	30.4262	120	114.036	43191	43191	43189	220428_iNrich_HELA_MG132_Trypsin_12.raw	F12.12	NA	2135	2.95	2	FALSE	0.004527	0.04077	0.094
High	Sequest HT	Sequest HT (A5)	A	5	Unambiguous	DKEGIPPDQQR	[Q].dkEGIPPDQQR.[L]	4	P62987; P62979	P62987	Ubiquitin-60S ribosomal protein L40 OS=Homo sapiens OX=9606 GN=UBA52 PE=1 SV=2;Ubiquitin-40S ribosomal protein S27a OS=Homo sapiens OX=9606 GN=RPS27A PE=1 SV=2	P62987; P62979; P0CG47; P0CG48	Ubiquitin-60S ribosomal protein L40 OS=Homo sapiens OX=9606 GN=UBA52 PE=1 SV=2; Ubiquitin-40S ribosomal protein S27a OS=Homo sapiens OX=9606 GN=RPS27A PE=1 SV=2; Polyubiquitin-B OS=Homo sapiens OX=9606 GN=UBB PE=1 SV=1; Polyubiquitin-C OS=Homo sapiens OX=9606 GN=UBC PE=1 SV=3	0	3	0	0.478	0	1	1	1	510.267	510.267	1528.79	1528.8	-7.42	-0.00378	0/0	0	0	8429092	HCD	MS2	97.5525	0.498	44.3094	15769	15769	15759	220621_E_205.raw	F6.5	NA	2362	1.82	2	FALSE	0.0009771	0.008867	0.261
High	Sequest HT	Sequest HT (A5)	A	5	Selected	DKEGIPPDQQR	[Q].dkEGIPPDQQR.[L]	4	P62987; P62979	P62987	Ubiquitin-60S ribosomal protein L40 OS=Homo sapiens OX=9606 GN=UBA52 PE=1 SV=2;Ubiquitin-40S ribosomal protein S27a OS=Homo sapiens OX=9606 GN=RPS27A PE=1 SV=2	P62987; P62979; P0CG47; P0CG48	Ubiquitin-60S ribosomal protein L40 OS=Homo sapiens OX=9606 GN=UBA52 PE=1 SV=2; Ubiquitin-40S ribosomal protein S27a OS=Homo sapiens OX=9606 GN=RPS27A PE=1 SV=2; Polyubiquitin-B OS=Homo sapiens OX=9606 GN=UBB PE=1 SV=1; Polyubiquitin-C OS=Homo sapiens OX=9606 GN=UBC PE=1 SV=3	0	3	0	0.2819	0	1	1	1	510.267	510.267	1528.79	1528.8	-7.62	-0.00388	0/0	0	0	6532570	HCD	MS2	97.4994	0.72	44.6195	15816	15816	15811	220621_E_206.raw	F6.6	NA	2360	1.49	2	FALSE	0.00668	0.0645	0.045
High	Sequest HT	Sequest HT (A5)	A	5	Unambiguous	DKEGIPPDQQR	[Q].dkEGIPPDQQR.[L]	4	P62987; P62979	P62987	Ubiquitin-60S ribosomal protein L40 OS=Homo sapiens OX=9606 GN=UBA52 PE=1 SV=2;Ubiquitin-40S ribosomal protein S27a OS=Homo sapiens OX=9606 GN=RPS27A PE=1 SV=2	P62987; P62979; P0CG47; P0CG48	Ubiquitin-60S ribosomal protein L40 OS=Homo sapiens OX=9606 GN=UBA52 PE=1 SV=2; Ubiquitin-40S ribosomal protein S27a OS=Homo sapiens OX=9606 GN=RPS27A PE=1 SV=2; Polyubiquitin-B OS=Homo sapiens OX=9606 GN=UBB PE=1 SV=1; Polyubiquitin-C OS=Homo sapiens OX=9606 GN=UBC PE=1 SV=3	0	3	0	0.4341	0	1	1	1	510.273	510.273	1528.8	1528.8	4.08	0.00208	0/0	0	0	4412153	HCD	MS2	98.4937	0.576	46.8976	16352	16352	16344	220621_E_305.raw	F7.5	NA	2391	1.82	2	FALSE	0.005998	0.05703	0.058
High	Sequest HT	Sequest HT (A5)	A	5	Unambiguous	DAGVIAGLNVLR	[K].dAGVIAGLNVLR.[I]	2	P0DMV9; P34931	P0DMV9	Heat shock 70 kDa protein 1B OS=Homo sapiens OX=9606 GN=HSPA1B PE=1 SV=1;Heat shock 70 kDa protein 1-like OS=Homo sapiens OX=9606 GN=HSPA1L PE=1 SV=2	P0DMV9; P34931	Heat shock 70 kDa protein 1B OS=Homo sapiens OX=9606 GN=HSPA1B PE=1 SV=1; Heat shock 70 kDa protein 1-like OS=Homo sapiens OX=9606 GN=HSPA1L PE=1 SV=2	0	2	2	0.5225	0	1	1	1	699.911	699.911	1398.82	1398.83	-7.46	-0.00521	0/0	0	0	3.11201e+06	HCD	MS2	9.11826	40.249	114.4	38963	38963	38956	200821_HELA_MGTG_iNrich_bRP_F03.raw	F1.3	NA	939	3.77	2	FALSE	0.0007096	0.006266	0.296
High	Sequest HT	Sequest HT (A5)	A	5	Selected	DKKKVLDKCQEVISWLDANTLAEKDEFEHKR	[A].dkkkVLDkcQEVISWLDANTLAEkDEFEHkR.[K]	1	P0DMV9	P0DMV9	Heat shock 70 kDa protein 1B OS=Homo sapiens OX=9606 GN=HSPA1B PE=1 SV=1	P0DMV9	Heat shock 70 kDa protein 1B OS=Homo sapiens OX=9606 GN=HSPA1B PE=1 SV=1	0	3	0	0.6433	0	1	1	1	1415.41	1415.41	4244.22	4244.24	-4.69	-0.00664	0/0	0	0	2.4353e+06	HCD	MS2	76.6658	120	127.369	59697	59697	59686	220621_E_207.raw	F6.7	NA	3258	6.98	1	FALSE	9.269e-06	3.558e-11	2.359
High	Sequest HT	Sequest HT (A5)	A	5	Unambiguous	DKKKVLDKCQEVISWLDANTLAEKDEFEHKR	[A].dkkkVLDkcQEVISWLDANTLAEkDEFEHkR.[K]	1	P0DMV9	P0DMV9	Heat shock 70 kDa protein 1B OS=Homo sapiens OX=9606 GN=HSPA1B PE=1 SV=1	P0DMV9	Heat shock 70 kDa protein 1B OS=Homo sapiens OX=9606 GN=HSPA1B PE=1 SV=1	0	4	4	0.5656	0	1	1	1	1061.81	1061.81	4244.21	4244.24	-7.47	-0.00792	0/0	0	0	210882	HCD	MS2	54.5564	120	127.628	50180	50180	50170	220621_E_307.raw	F7.7	NA	3467	5.87	1	FALSE	3.982e-05	0.0002728	0.621
High	Sequest HT	Sequest HT (A5)	A	5	Selected	DLVLVGGSTR	[H].dLVLVGGSTR.[I]	1	P0DMV9	P0DMV9	Heat shock 70 kDa protein 1B OS=Homo sapiens OX=9606 GN=HSPA1B PE=1 SV=1	P0DMV9	Heat shock 70 kDa protein 1B OS=Homo sapiens OX=9606 GN=HSPA1B PE=1 SV=1	0	2	2	0	0	1	1	1	609.356	609.356	1217.7	1217.7	-0.07	-4e-05	0/0	0	0	1.19814e+06	HCD	MS2	27.929	109.936	63.5581	22290	22290	22285	220428_iNrich_HELA_MG132_Trypsin_10.raw	F12.10	NA	1395	2.7	1	FALSE	9.666e-05	0.0006674	0.524
High	Sequest HT	Sequest HT (B5)	B	5	Selected	DVSILTIDDGIFEVKATAGDTHLGGEDFDNRLVN	[F].dVSILTIDDGIFEVkATAGDTHLGGEDFDNRLVN.[H]	1	P0DMV9	P0DMV9	Heat shock 70 kDa protein 1B OS=Homo sapiens OX=9606 GN=HSPA1B PE=1 SV=1	P0DMV9	Heat shock 70 kDa protein 1B OS=Homo sapiens OX=9606 GN=HSPA1B PE=1 SV=1	5	3	0	0.5316	0	1	1	1	1298.31	1298.31	3892.92	3892.95	-6.6	-0.00857	0/0	0	0	4.03787e+06	HCD	MS2	73.2278	67.112	78.7709	34055	34055	34049	220425_iNrich_HELA_MG132_Chymotrypsin_bRP_11.raw	F11.11	NA	2527	4.59	1	FALSE	0.002999	0.01322	0.152
High	Sequest HT	Sequest HT (A5)	A	5	Unambiguous	DVNAAIATIKTKR	[K].dVNAAIATIkTkR.[TS]	5	P0DPH8; P68363; Q9BQE3	P0DPH8	Tubulin alpha-3D chain OS=Homo sapiens OX=9606 GN=TUBA3D PE=1 SV=1;Tubulin alpha-1B chain OS=Homo sapiens OX=9606 GN=TUBA1B PE=1 SV=1;Tubulin alpha-1C chain OS=Homo sapiens OX=9606 GN=TUBA1C PE=1 SV=1	P0DPH8; Q6PEY2; Q71U36; P68363; Q9BQE3	Tubulin alpha-3D chain OS=Homo sapiens OX=9606 GN=TUBA3D PE=1 SV=1; Tubulin alpha-3E chain OS=Homo sapiens OX=9606 GN=TUBA3E PE=1 SV=2; Tubulin alpha-1A chain OS=Homo sapiens OX=9606 GN=TUBA1A PE=1 SV=1; Tubulin alpha-1B chain OS=Homo sapiens OX=9606 GN=TUBA1B PE=1 SV=1; Tubulin alpha-1C chain OS=Homo sapiens OX=9606 GN=TUBA1C PE=1 SV=1	0	2	2	0.7054	0	1	1	1	846.505	846.505	1692	1692.01	-5.54	-0.00469	0/0	0	0	1.0631e+06	HCD	MS2	22.9306	120	108.483	35498	35498	35487	200821_HELA_MGTG_iNrich_bRP_F01.raw	F1.1	NA	641	3.87	3	FALSE	9.666e-05	0.0006656	0.524
High	Sequest HT	Sequest HT (A5)	A	5	Unambiguous	QLFHPEQLITGKEDAANNYAR	[R].qLFHPEQLITGkEDAANNYAR.[G]	6	P0DPH8; Q9NY65; P68363; Q9BQE3; P68366	P0DPH8	Tubulin alpha-3D chain OS=Homo sapiens OX=9606 GN=TUBA3D PE=1 SV=1;Tubulin alpha-8 chain OS=Homo sapiens OX=9606 GN=TUBA8 PE=1 SV=1;Tubulin alpha-1B chain OS=Homo sapiens OX=9606 GN=TUBA1B PE=1 SV=1;Tubulin alpha-1C chain OS=Homo sapiens OX=9606 GN=TUBA1C PE=1 SV=1;Tubulin alpha-4A chain OS=Homo sapiens OX=9606 GN=TUBA4A PE=1 SV=1	P0DPH8; Q71U36; Q9NY65; P68363; Q9BQE3; P68366	Tubulin alpha-3D chain OS=Homo sapiens OX=9606 GN=TUBA3D PE=1 SV=1; Tubulin alpha-1A chain OS=Homo sapiens OX=9606 GN=TUBA1A PE=1 SV=1; Tubulin alpha-8 chain OS=Homo sapiens OX=9606 GN=TUBA8 PE=1 SV=1; Tubulin alpha-1B chain OS=Homo sapiens OX=9606 GN=TUBA1B PE=1 SV=1; Tubulin alpha-1C chain OS=Homo sapiens OX=9606 GN=TUBA1C PE=1 SV=1; Tubulin alpha-4A chain OS=Homo sapiens OX=9606 GN=TUBA4A PE=1…	0	3	3	0.5541	0	1	1	1	888.127	888.127	2662.37	2662.35	6.29	0.00558	0/0	0	0	1.45001e+06	HCD	MS2	51.2644	120	99.2868	32429	32429	32427	200925_HELA_iNrich_bRP_F01.raw	F2.1	NA	3115	4.44	5	FALSE	9.269e-06	6.772e-07	1.286
High	Sequest HT	Sequest HT (A5)	A	5	Unambiguous	QLFHPEQLITGKEDAANNYAR	[R].qLFHPEQLITGkEDAANNYAR.[G]	6	P0DPH8; Q9NY65; P68363; Q9BQE3; P68366	P0DPH8	Tubulin alpha-3D chain OS=Homo sapiens OX=9606 GN=TUBA3D PE=1 SV=1;Tubulin alpha-8 chain OS=Homo sapiens OX=9606 GN=TUBA8 PE=1 SV=1;Tubulin alpha-1B chain OS=Homo sapiens OX=9606 GN=TUBA1B PE=1 SV=1;Tubulin alpha-1C chain OS=Homo sapiens OX=9606 GN=TUBA1C PE=1 SV=1;Tubulin alpha-4A chain OS=Homo sapiens OX=9606 GN=TUBA4A PE=1 SV=1	P0DPH8; Q71U36; Q9NY65; P68363; Q9BQE3; P68366	Tubulin alpha-3D chain OS=Homo sapiens OX=9606 GN=TUBA3D PE=1 SV=1; Tubulin alpha-1A chain OS=Homo sapiens OX=9606 GN=TUBA1A PE=1 SV=1; Tubulin alpha-8 chain OS=Homo sapiens OX=9606 GN=TUBA8 PE=1 SV=1; Tubulin alpha-1B chain OS=Homo sapiens OX=9606 GN=TUBA1B PE=1 SV=1; Tubulin alpha-1C chain OS=Homo sapiens OX=9606 GN=TUBA1C PE=1 SV=1; Tubulin alpha-4A chain OS=Homo sapiens OX=9606 GN=TUBA4A PE=1…	0	3	0	0.2871	0	1	1	1	888.128	888.128	2662.37	2662.35	7.76	0.00689	0/0	0	0	3.35656e+06	HCD	MS2	90.6044	11.958	86.9414	36492	36492	36481	220621_E_302.raw	F7.2	NA	3103	2.02	5	FALSE	0.00424	0.03812	0.101
High	Sequest HT	Sequest HT (A5)	A	5	Selected	ETAPAAPAAPAPAEKTPVKKKAR	[S].eTAPAAPAAPAPAEkTPVkkkAR.[K]	1	P10412	P10412	Histone H1.4 OS=Homo sapiens OX=9606 GN=H1-4 PE=1 SV=2	P10412	Histone H1.4 OS=Homo sapiens OX=9606 GN=H1-4 PE=1 SV=2	0	3	3	0.7679	0	1	1	1	894.524	894.525	2681.56	2681.56	0.88	0.00079	0/0	0	0	2121389	HCD	MS2	18.7374	48.322	65.9417	27819	27819	27810	220621_E_202.raw	F6.2	NA	512	6.29	1	FALSE	9.269e-06	4.895e-09	1.822
High	Sequest HT	Sequest HT (A5)	A	5	Selected	ELITKAVAASKER	[S].eLITkAVAASkER.[NS]	4	P16401; P16402; P10412; P16403	P16401	Histone H1.5 OS=Homo sapiens OX=9606 GN=H1-5 PE=1 SV=3;Histone H1.3 OS=Homo sapiens OX=9606 GN=H1-3 PE=1 SV=2;Histone H1.4 OS=Homo sapiens OX=9606 GN=H1-4 PE=1 SV=2;Histone H1.2 OS=Homo sapiens OX=9606 GN=H1-2 PE=1 SV=2	P16401; P16402; P10412; P16403	Histone H1.5 OS=Homo sapiens OX=9606 GN=H1-5 PE=1 SV=3; Histone H1.3 OS=Homo sapiens OX=9606 GN=H1-3 PE=1 SV=2; Histone H1.4 OS=Homo sapiens OX=9606 GN=H1-4 PE=1 SV=2; Histone H1.2 OS=Homo sapiens OX=9606 GN=H1-2 PE=1 SV=2	0	3	3	0.4191	0	1	1	1	569.675	569.676	1707.01	1707.01	0.21	0.00012	0/0	0	0	992417	HCD	MS2	28.7223	120	90.0176	41441	41441	41434	220621_E_203.raw	F6.3	NA	623	4.39	4	FALSE	0.0003515	0.002836	0.375
High	Sequest HT	Sequest HT (A5)	A	5	Selected	DDAMLLKGKGDKAQIEKR	[K].dDAMLLkGkGDkAQIEkR.[I]	1	P10809	P10809	60 kDa heat shock protein, mitochondrial OS=Homo sapiens OX=9606 GN=HSPD1 PE=1 SV=2	P10809	60 kDa heat shock protein, mitochondrial OS=Homo sapiens OX=9606 GN=HSPD1 PE=1 SV=2	0	3	3	0.4301	0	1	1	1	799.783	799.783	2397.34	2397.34	-1.26	-0.00101	0/0	0	0	2.156e+06	HCD	MS2	55.4899	120	109.002	35482	35482	35473	200821_HELA_MGTG_iNrich_bRP_F10.raw	F1.10	NA	1428	4.79	1	FALSE	0.001975	0.0174	0.189
High	Sequest HT	Sequest HT (A5)	A	5	Unambiguous	DDAMLLKGKGDKAQIEKR	[K].dDAmLLkGkGDkAQIEkR.[I]	1	P10809	P10809	60 kDa heat shock protein, mitochondrial OS=Homo sapiens OX=9606 GN=HSPD1 PE=1 SV=2	P10809	60 kDa heat shock protein, mitochondrial OS=Homo sapiens OX=9606 GN=HSPD1 PE=1 SV=2	0	3	3	0.4825	0	1	1	1	805.111	805.111	2413.32	2413.33	-6.07	-0.00489	0/0	0	0	1269746	HCD	MS2	30.3086	120	109.93	35845	35845	35837	200821_HELA_MGTG_iNrich_bRP_F10.raw	F1.10	NA	2018	3.15	1	FALSE	0.0006309	0.005453	0.31
High	Sequest HT	Sequest HT (A5)	A	5	Selected	DALNATRAAVEEGIVLGGGCALLR	[T].dALNATRAAVEEGIVLGGGcALLR.[C]	1	P10809	P10809	60 kDa heat shock protein, mitochondrial OS=Homo sapiens OX=9606 GN=HSPD1 PE=1 SV=2	P10809	60 kDa heat shock protein, mitochondrial OS=Homo sapiens OX=9606 GN=HSPD1 PE=1 SV=2	1	3	3	0.5726	0	1	1	1	876.474	876.474	2627.41	2627.41	-1.58	-0.00138	0/0	0	0	2.34291e+06	HCD	MS2	33.4679	103.997	105.981	34498	34498	34491	200925_HELA_iNrich_bRP_F04.raw	F2.4	NA	2495	7.02	1	FALSE	9.269e-06	2.467e-08	1.646
High	Sequest HT	Sequest HT (A5)	A	5	Selected	DALNATRAAVEEGIVLGGGCALLR	[T].dALNATRAAVEEGIVLGGGcALLR.[C]	1	P10809	P10809	60 kDa heat shock protein, mitochondrial OS=Homo sapiens OX=9606 GN=HSPD1 PE=1 SV=2	P10809	60 kDa heat shock protein, mitochondrial OS=Homo sapiens OX=9606 GN=HSPD1 PE=1 SV=2	1	3	3	0.55	0	1	1	1	876.474	876.474	2627.41	2627.41	-1.99	-0.00174	0/0	0	0	939112	HCD	MS2	13.9984	120	106.164	34575	34575	34569	200925_HELA_iNrich_bRP_F04.raw	F2.4	NA	2466	6.6	1	FALSE	9.269e-06	3.364e-07	1.362
High	Sequest HT	Sequest HT (A5)	A	5	Selected	DALNATRAAVEEGIVLGGGCALLR	[T].dALNATRAAVEEGIVLGGGcALLR.[C]	1	P10809	P10809	60 kDa heat shock protein, mitochondrial OS=Homo sapiens OX=9606 GN=HSPD1 PE=1 SV=2	P10809	60 kDa heat shock protein, mitochondrial OS=Homo sapiens OX=9606 GN=HSPD1 PE=1 SV=2	1	3	3	0.5373	0	1	1	1	876.474	876.474	2627.41	2627.41	-1.88	-0.00164	0/0	0	0	1.80401e+06	HCD	MS2	32.8919	120	115.757	39175	39175	39164	200925_HELA_iNrich_bRP_F09.raw	F2.9	NoneMonoisotopic	2473	6.7	1	FALSE	9.269e-06	5.738e-07	1.304
High	Sequest HT	Sequest HT (A5)	A	5	Selected	NEEAGDGTTTATVLAR	[T].nEEAGDGTTTATVLAR.[S]	1	P10809	P10809	60 kDa heat shock protein, mitochondrial OS=Homo sapiens OX=9606 GN=HSPD1 PE=1 SV=2	P10809	60 kDa heat shock protein, mitochondrial OS=Homo sapiens OX=9606 GN=HSPD1 PE=1 SV=2	0	2	0	0.4034	0	1	1	1	904.448	904.448	1807.89	1807.89	1.26	0.00114	0/0	0	0	6.58529e+06	HCD	MS2	70.8035	40.464	61.2001	24712	24712	24703	220621_E_112.raw	F5.12	NA	2491	1.76	1	FALSE	0.002518	0.02247	0.16
High	Sequest HT	Sequest HT (A5)	A	5	Selected	NEEAGDGTTTATVLAR	[T].nEEAGDGTTTATVLAR.[S]	1	P10809	P10809	60 kDa heat shock protein, mitochondrial OS=Homo sapiens OX=9606 GN=HSPD1 PE=1 SV=2	P10809	60 kDa heat shock protein, mitochondrial OS=Homo sapiens OX=9606 GN=HSPD1 PE=1 SV=2	0	2	0	0.2857	0	1	1	1	904.446	904.446	1807.88	1807.89	-1	-0.0009	0/0	0	0	7791766	HCD	MS2	68.1258	36.993	63.2992	25216	25216	25210	220621_E_301.raw	F7.1	NA	2452	1.89	1	FALSE	0.0006878	0.005997	0.301
High	Sequest HT	Sequest HT (A5)	A	5	Selected	NVLRIINEPTAAAIAYGLDKKVGAER	[L].nVLRIINEPTAAAIAYGLDkkVGAER.[N]	1	P11142	P11142	Heat shock cognate 71 kDa protein OS=Homo sapiens OX=9606 GN=HSPA8 PE=1 SV=1	P11142	Heat shock cognate 71 kDa protein OS=Homo sapiens OX=9606 GN=HSPA8 PE=1 SV=1	1	3	0	0.5821	0	1	1	1	1025.57	1025.57	3074.7	3074.73	-8.94	-0.00917	0/0	0	0	1.78501e+06	HCD	MS2	61.221	120	108.328	47152	47152	47141	220621_E_303.raw	F7.3	NA	1395	3.47	1	FALSE	0.0003515	0.002789	0.377
High	Sequest HT	Sequest HT (A5)	A	5	Unambiguous	EAKVHEEIDR	[V].eAkVHEEIDR.[V]	3	P11509	P11509	Cytochrome P450 2A6 OS=Homo sapiens OX=9606 GN=CYP2A6 PE=1 SV=4	Q16696; P11509; P20853	Cytochrome P450 2A13 OS=Homo sapiens OX=9606 GN=CYP2A13 PE=1 SV=3; Cytochrome P450 2A6 OS=Homo sapiens OX=9606 GN=CYP2A6 PE=1 SV=4; Cytochrome P450 2A7 OS=Homo sapiens OX=9606 GN=CYP2A7 PE=2 SV=2	0	2	2	0.1271	0	1	1	1	736.392	736.392	1471.78	1471.78	0.16	0.00012	0/0	0	0	1.58597e+06	HCD	MS2	22.478	120	105.353	34209	34209	34201	200925_HELA_iNrich_bRP_F02.raw	F2.2	NA	2160	2.91	1	FALSE	0.002195	0.01892	0.18
High	Sequest HT	Sequest HT (A5)	A	5	Selected	NEVENQILTR	[I].nEVENQILTR.[D]	2	P12814; O43707	P12814	Alpha-actinin-1 OS=Homo sapiens OX=9606 GN=ACTN1 PE=1 SV=2;Alpha-actinin-4 OS=Homo sapiens OX=9606 GN=ACTN4 PE=1 SV=2	P12814; O43707	Alpha-actinin-1 OS=Homo sapiens OX=9606 GN=ACTN1 PE=1 SV=2; Alpha-actinin-4 OS=Homo sapiens OX=9606 GN=ACTN4 PE=1 SV=2	0	2	2	0.3511	0	1	1	1	709.377	709.377	1417.75	1417.75	-0.03	-2e-05	0/0	0	0	256537	HCD	MS2	47.1904	120	68.1246	17724	17724	17714	200821_HELA_MGTG_iNrich_bRP_F05.raw	F1.5	NA	2472	1.88	2	FALSE	0.003858	0.03413	0.113
High	Sequest HT	Sequest HT (A5)	A	5	Selected	EAVVISGR	[N].eAVVISGR.[K]	1	P13995	P13995	Bifunctional methylenetetrahydrofolate dehydrogenase/cyclohydrolase, mitochondrial OS=Homo sapiens OX=9606 GN=MTHFD2 PE=1 SV=2	P13995	Bifunctional methylenetetrahydrofolate dehydrogenase/cyclohydrolase, mitochondrial OS=Homo sapiens OX=9606 GN=MTHFD2 PE=1 SV=2	0	2	0	0.1765	0	1	1	1	516.307	516.306	1031.61	1031.6	2.1	0.00109	0/0	0	0	4455445	HCD	MS2	76.4896	42.86	45.352	15540	15540	15538	220621_E_212.raw	F6.12	NA	1198	2.21	1	FALSE	0.005378	0.05045	0.071
High	Sequest HT	Sequest HT (A5)	A	5	Unambiguous	EAVVISGR	[N].eAVVISGR.[K]	1	P13995	P13995	Bifunctional methylenetetrahydrofolate dehydrogenase/cyclohydrolase, mitochondrial OS=Homo sapiens OX=9606 GN=MTHFD2 PE=1 SV=2	P13995	Bifunctional methylenetetrahydrofolate dehydrogenase/cyclohydrolase, mitochondrial OS=Homo sapiens OX=9606 GN=MTHFD2 PE=1 SV=2	0	2	0	0.1907	0	1	1	1	516.305	516.305	1031.6	1031.6	-1.12	-0.00058	0/0	0	0	1.37808e+06	HCD	MS2	47.5136	66.229	47.5579	14738	14738	14729	220621_E_312.raw	F7.12	NA	1379	1.94	1	FALSE	0.001215	0.01061	0.242
High	Sequest HT	Sequest HT (A5)	A	5	Unambiguous	NFSHGTHEYHAETIKNVR	[L].nFSHGTHEYHAETIkNVR.[T]	1	P14618	P14618	Pyruvate kinase PKM OS=Homo sapiens OX=9606 GN=PKM PE=1 SV=4	P14618	Pyruvate kinase PKM OS=Homo sapiens OX=9606 GN=PKM PE=1 SV=4	0	4	4	0.1545	0	1	1	1	597.552	597.552	2387.18	2387.18	3.75	0.00224	0/0	0	0	183011	HCD	MS2	73.2467	120	77.4113	22287	22287	22286	200821_HELA_MGTG_iNrich_bRP_F10.raw	F1.10	NA	2891	2.2	1	FALSE	0.0004267	0.003839	0.345
High	Sequest HT	Sequest HT (A5)	A	5	Selected	ETLKEMIKSGMNVAR	[V].eTLkEMIkSGMNVAR.[L]	1	P14618	P14618	Pyruvate kinase PKM OS=Homo sapiens OX=9606 GN=PKM PE=1 SV=4	P14618	Pyruvate kinase PKM OS=Homo sapiens OX=9606 GN=PKM PE=1 SV=4	0	2	2	0.2518	0	1	1	1	999.54	999.54	1998.07	1998.08	-4.81	-0.00481	0/0	0	0	1.6919e+06	HCD	MS2	62.6282	120	120.818	41031	41031	41021	200925_HELA_iNrich_bRP_F05.raw	F2.5	NoneMonoisotopic	2321	2.82	1	FALSE	0.001048	0.00935	0.256
High	Sequest HT	Sequest HT (A5)	A	5	Unambiguous	DDEVDVDGTVEEDLGKSR	[A].dDEVDVDGTVEEDLGkSR.[E]	1	P14625	P14625	Endoplasmin OS=Homo sapiens OX=9606 GN=HSP90B1 PE=1 SV=1	P14625	Endoplasmin OS=Homo sapiens OX=9606 GN=HSP90B1 PE=1 SV=1	0	2	2	0.5138	0	1	1	1	1112.53	1112.53	2224.05	2224.05	-1.42	-0.00158	0/0	0	0	496347	HCD	MS2	0	120	86.8157	25046	25046	25041	200821_HELA_MGTG_iNrich_bRP_F05.raw	F1.5	NA	1923	2.9	1	FALSE	9.269e-06	1.76e-07	1.432
High	Sequest HT	Sequest HT (A5)	A	5	Selected	DDEVDVDGTVEEDLGKSR	[A].dDEVDVDGTVEEDLGkSR.[E]	1	P14625	P14625	Endoplasmin OS=Homo sapiens OX=9606 GN=HSP90B1 PE=1 SV=1	P14625	Endoplasmin OS=Homo sapiens OX=9606 GN=HSP90B1 PE=1 SV=1	0	3	3	0.6987	0	1	1	1	742.022	742.022	2224.05	2224.05	0.77	0.00057	0/0	0	0	1.42067e+06	HCD	MS2	28.7886	120	86.8234	25049	25049	25041	200821_HELA_MGTG_iNrich_bRP_F05.raw	F1.5	NA	2035	5.21	1	FALSE	9.269e-06	2.233e-08	1.657
High	Sequest HT	Sequest HT (A5)	A	5	Selected	DDEVDVDGTVEEDLGKSR	[A].dDEVDVDGTVEEDLGkSR.[E]	1	P14625	P14625	Endoplasmin OS=Homo sapiens OX=9606 GN=HSP90B1 PE=1 SV=1	P14625	Endoplasmin OS=Homo sapiens OX=9606 GN=HSP90B1 PE=1 SV=1	0	3	3	0.7135	0	1	1	1	742.021	742.021	2224.05	2224.05	0.26	0.00019	0/0	0	0	1.63099e+06	HCD	MS2	0	120	89.8789	26221	26221	26211	200821_HELA_MGTG_iNrich_bRP_F05.raw	F1.5	NA	2015	5.55	1	FALSE	9.269e-06	1.333e-07	1.463
High	Sequest HT	Sequest HT (A5)	A	5	Selected	DDEVDVDGTVEEDLGKSR	[A].dDEVDVDGTVEEDLGkSR.[E]	1	P14625	P14625	Endoplasmin OS=Homo sapiens OX=9606 GN=HSP90B1 PE=1 SV=1	P14625	Endoplasmin OS=Homo sapiens OX=9606 GN=HSP90B1 PE=1 SV=1	0	3	3	0.6879	0	1	1	1	742.021	742.021	2224.05	2224.05	0.32	0.00024	0/0	0	0	676924	HCD	MS2	15.7964	120	94.63	28097	28097	28086	200821_HELA_MGTG_iNrich_bRP_F05.raw	F1.5	NA	2007	4.87	1	FALSE	9.269e-06	1.354e-08	1.712
High	Sequest HT	Sequest HT (A5)	A	5	Unambiguous	DDEVDVDGTVEEDLGKSR	[A].dDEVDVDGTVEEDLGkSR.[E]	1	P14625	P14625	Endoplasmin OS=Homo sapiens OX=9606 GN=HSP90B1 PE=1 SV=1	P14625	Endoplasmin OS=Homo sapiens OX=9606 GN=HSP90B1 PE=1 SV=1	0	2	2	0.6232	0	1	1	1	1112.53	1112.53	2224.05	2224.05	0.84	0.00094	0/0	0	0	351393	HCD	MS2	0	120	94.7212	28132	28132	28125	200821_HELA_MGTG_iNrich_bRP_F05.raw	F1.5	NA	2034	2.84	1	FALSE	9.269e-06	1.765e-06	1.181
High	Sequest HT	Sequest HT (A5)	A	5	Selected	DDEVDVDGTVEEDLGKSR	[A].dDEVDVDGTVEEDLGkSR.[E]	1	P14625	P14625	Endoplasmin OS=Homo sapiens OX=9606 GN=HSP90B1 PE=1 SV=1	P14625	Endoplasmin OS=Homo sapiens OX=9606 GN=HSP90B1 PE=1 SV=1	0	3	3	0.7157	0	1	1	1	742.022	742.022	2224.05	2224.05	1.22	0.0009	0/0	0	0	1.84311e+06	HCD	MS2	24.4978	119.893	82.3282	24427	24427	24423	200821_HELA_MGTG_iNrich_bRP_F06.raw	F1.6	NA	2051	6.05	1	FALSE	9.269e-06	3.7e-09	1.853
High	Sequest HT	Sequest HT (A5)	A	5	Unambiguous	DDEVDVDGTVEEDLGKSR	[A].dDEVDVDGTVEEDLGkSR.[E]	1	P14625	P14625	Endoplasmin OS=Homo sapiens OX=9606 GN=HSP90B1 PE=1 SV=1	P14625	Endoplasmin OS=Homo sapiens OX=9606 GN=HSP90B1 PE=1 SV=1	0	2	2	0.6934	0	1	1	1	1112.53	1112.53	2224.05	2224.05	-0.04	-4e-05	0/0	0	0	1.33639e+06	HCD	MS2	0	120	82.3334	24429	24429	24423	200821_HELA_MGTG_iNrich_bRP_F06.raw	F1.6	NA	1981	4.11	1	FALSE	9.269e-06	1.171e-11	2.48
High	Sequest HT	Sequest HT (A5)	A	5	Unambiguous	DDEVDVDGTVEEDLGKSR	[A].dDEVDVDGTVEEDLGkSR.[E]	1	P14625	P14625	Endoplasmin OS=Homo sapiens OX=9606 GN=HSP90B1 PE=1 SV=1	P14625	Endoplasmin OS=Homo sapiens OX=9606 GN=HSP90B1 PE=1 SV=1	0	2	2	0.61	0	1	1	1	1112.53	1112.53	2224.05	2224.05	-1.06	-0.00118	0/0	0	0	987063	HCD	MS2	6.23733	120	87.0841	26390	26390	26386	200821_HELA_MGTG_iNrich_bRP_F06.raw	F1.6	NA	1943	4	1	FALSE	9.269e-06	5.708e-12	2.558
High	Sequest HT	Sequest HT (A5)	A	5	Selected	DDEVDVDGTVEEDLGKSR	[A].dDEVDVDGTVEEDLGkSR.[E]	1	P14625	P14625	Endoplasmin OS=Homo sapiens OX=9606 GN=HSP90B1 PE=1 SV=1	P14625	Endoplasmin OS=Homo sapiens OX=9606 GN=HSP90B1 PE=1 SV=1	0	3	3	0.7116	0	1	1	1	742.021	742.021	2224.05	2224.05	0.36	0.00027	0/0	0	0	3.81723e+06	HCD	MS2	21.4808	46.291	87.1284	26409	26409	26399	200821_HELA_MGTG_iNrich_bRP_F06.raw	F1.6	NA	2011	5.41	1	FALSE	9.269e-06	3.043e-08	1.623
High	Sequest HT	Sequest HT (A5)	A	5	Selected	DDEVDVDGTVEEDLGKSR	[A].dDEVDVDGTVEEDLGkSR.[E]	1	P14625	P14625	Endoplasmin OS=Homo sapiens OX=9606 GN=HSP90B1 PE=1 SV=1	P14625	Endoplasmin OS=Homo sapiens OX=9606 GN=HSP90B1 PE=1 SV=1	0	2	2	0.6821	0	1	1	1	1112.53	1112.53	2224.05	2224.05	-0.18	-0.0002	0/0	0	0	408471	HCD	MS2	0	120	87.8352	26697	26697	26685	200821_HELA_MGTG_iNrich_bRP_F06.raw	F1.6	NA	1949	3.9	1	FALSE	9.269e-06	6.614e-08	1.539
High	Sequest HT	Sequest HT (A5)	A	5	Selected	DDEVDVDGTVEEDLGKSR	[A].dDEVDVDGTVEEDLGkSR.[E]	1	P14625	P14625	Endoplasmin OS=Homo sapiens OX=9606 GN=HSP90B1 PE=1 SV=1	P14625	Endoplasmin OS=Homo sapiens OX=9606 GN=HSP90B1 PE=1 SV=1	0	3	3	0.7209	0	1	1	1	742.019	742.019	2224.04	2224.05	-3.01	-0.00223	0/0	0	0	1.40001e+06	HCD	MS2	43.301	120	87.888	26718	26718	26711	200821_HELA_MGTG_iNrich_bRP_F06.raw	F1.6	NA	1887	5.41	1	FALSE	9.269e-06	5.297e-07	1.312
High	Sequest HT	Sequest HT (A5)	A	5	Selected	DDEVDVDGTVEEDLGKSR	[A].dDEVDVDGTVEEDLGkSR.[E]	1	P14625	P14625	Endoplasmin OS=Homo sapiens OX=9606 GN=HSP90B1 PE=1 SV=1	P14625	Endoplasmin OS=Homo sapiens OX=9606 GN=HSP90B1 PE=1 SV=1	0	3	3	0.6945	0	1	1	1	742.021	742.021	2224.05	2224.05	-0.1	-8e-05	0/0	0	0	7.29125e+06	HCD	MS2	10.6296	23.217	90.3775	27739	27739	27738	200821_HELA_MGTG_iNrich_bRP_F06.raw	F1.6	NA	1959	5.5	1	FALSE	9.269e-06	4.716e-10	2.077
High	Sequest HT	Sequest HT (A5)	A	5	Selected	DDEVDVDGTVEEDLGKSR	[A].dDEVDVDGTVEEDLGkSR.[E]	1	P14625	P14625	Endoplasmin OS=Homo sapiens OX=9606 GN=HSP90B1 PE=1 SV=1	P14625	Endoplasmin OS=Homo sapiens OX=9606 GN=HSP90B1 PE=1 SV=1	0	2	2	0.6325	0	1	1	1	1112.53	1112.53	2224.05	2224.05	-0.04	-5e-05	0/0	0	0	2863562	HCD	MS2	0	120	90.3801	27740	27740	27738	200821_HELA_MGTG_iNrich_bRP_F06.raw	F1.6	NA	1981	5.47	1	FALSE	9.269e-06	3.158e-17	3.877
High	Sequest HT	Sequest HT (A5)	A	5	Selected	DDEVDVDGTVEEDLGKSR	[A].dDEVDVDGTVEEDLGkSR.[E]	1	P14625	P14625	Endoplasmin OS=Homo sapiens OX=9606 GN=HSP90B1 PE=1 SV=1	P14625	Endoplasmin OS=Homo sapiens OX=9606 GN=HSP90B1 PE=1 SV=1	0	3	3	0.6966	0	1	1	1	742.021	742.021	2224.05	2224.05	-0.42	-0.00031	0/0	0	0	36274512	HCD	MS2	2.62814	4.409	90.8998	27947	27947	27946	200821_HELA_MGTG_iNrich_bRP_F06.raw	F1.6	NA	1948	5.24	1	FALSE	9.269e-06	1.241e-09	1.972
High	Sequest HT	Sequest HT (A5)	A	5	Selected	DDEVDVDGTVEEDLGKSR	[A].dDEVDVDGTVEEDLGkSR.[E]	1	P14625	P14625	Endoplasmin OS=Homo sapiens OX=9606 GN=HSP90B1 PE=1 SV=1	P14625	Endoplasmin OS=Homo sapiens OX=9606 GN=HSP90B1 PE=1 SV=1	0	2	2	0.6469	0	1	1	1	1112.53	1112.53	2224.05	2224.05	-0.36	-0.0004	0/0	0	0	14279437	HCD	MS2	0	16.489	90.9011	27948	27948	27946	200821_HELA_MGTG_iNrich_bRP_F06.raw	F1.6	NA	1943	4.39	1	FALSE	9.269e-06	1.635e-16	3.698
High	Sequest HT	Sequest HT (A5)	A	5	Unambiguous	DDEVDVDGTVEEDLGKSR	[A].dDEVDVDGTVEEDLGkSR.[E]	1	P14625	P14625	Endoplasmin OS=Homo sapiens OX=9606 GN=HSP90B1 PE=1 SV=1	P14625	Endoplasmin OS=Homo sapiens OX=9606 GN=HSP90B1 PE=1 SV=1	0	3	3	0.7002	0	1	1	1	742.021	742.021	2224.05	2224.05	-0.17	-0.00012	0/0	0	0	13723320	HCD	MS2	15.2982	7.774	91.4373	28168	28168	28167	200821_HELA_MGTG_iNrich_bRP_F06.raw	F1.6	NA	1954	4.77	1	FALSE	9.269e-06	1.917e-08	1.674
High	Sequest HT	Sequest HT (A5)	A	5	Unambiguous	DDEVDVDGTVEEDLGKSR	[A].dDEVDVDGTVEEDLGkSR.[E]	1	P14625	P14625	Endoplasmin OS=Homo sapiens OX=9606 GN=HSP90B1 PE=1 SV=1	P14625	Endoplasmin OS=Homo sapiens OX=9606 GN=HSP90B1 PE=1 SV=1	0	2	2	0.6532	0	1	1	1	1112.53	1112.53	2224.05	2224.05	0.64	0.00071	0/0	0	0	6490942	HCD	MS2	0	70.185	91.4391	28169	28169	28167	200821_HELA_MGTG_iNrich_bRP_F06.raw	F1.6	NA	2033	5.71	1	FALSE	9.269e-06	3.18e-16	3.625
High	Sequest HT	Sequest HT (A5)	A	5	Selected	DDEVDVDGTVEEDLGKSR	[A].dDEVDVDGTVEEDLGkSR.[E]	1	P14625	P14625	Endoplasmin OS=Homo sapiens OX=9606 GN=HSP90B1 PE=1 SV=1	P14625	Endoplasmin OS=Homo sapiens OX=9606 GN=HSP90B1 PE=1 SV=1	0	3	3	0.7182	0	1	1	1	742.021	742.021	2224.05	2224.05	0.17	0.00013	0/0	0	0	7438101	HCD	MS2	1.95695	18.922	91.973	28389	28389	28388	200821_HELA_MGTG_iNrich_bRP_F06.raw	F1.6	NA	2002	5.43	1	FALSE	9.269e-06	4.267e-10	2.088
High	Sequest HT	Sequest HT (A5)	A	5	Unambiguous	DDEVDVDGTVEEDLGKSR	[A].dDEVDVDGTVEEDLGkSR.[E]	1	P14625	P14625	Endoplasmin OS=Homo sapiens OX=9606 GN=HSP90B1 PE=1 SV=1	P14625	Endoplasmin OS=Homo sapiens OX=9606 GN=HSP90B1 PE=1 SV=1	0	2	2	0.6667	0	1	1	1	1112.53	1112.53	2224.05	2224.05	-1.11	-0.00124	0/0	0	0	2.65561e+06	HCD	MS2	0	120	91.9989	28400	28400	28388	200821_HELA_MGTG_iNrich_bRP_F06.raw	F1.6	NA	1940	5.7	1	FALSE	9.269e-06	6.054e-15	3.304
High	Sequest HT	Sequest HT (A5)	A	5	Unambiguous	DDEVDVDGTVEEDLGKSR	[A].dDEVDVDGTVEEDLGkSR.[E]	1	P14625	P14625	Endoplasmin OS=Homo sapiens OX=9606 GN=HSP90B1 PE=1 SV=1	P14625	Endoplasmin OS=Homo sapiens OX=9606 GN=HSP90B1 PE=1 SV=1	0	2	2	0.6667	0	1	1	1	1112.53	1112.53	2224.06	2224.05	3.07	0.00342	0/0	0	0	2.39281e+06	HCD	MS2	0	120	92.5177	28623	28623	28622	200821_HELA_MGTG_iNrich_bRP_F06.raw	F1.6	NA	2128	4.95	1	FALSE	9.269e-06	7.988e-12	2.522
High	Sequest HT	Sequest HT (A5)	A	5	Selected	DDEVDVDGTVEEDLGKSR	[A].dDEVDVDGTVEEDLGkSR.[E]	1	P14625	P14625	Endoplasmin OS=Homo sapiens OX=9606 GN=HSP90B1 PE=1 SV=1	P14625	Endoplasmin OS=Homo sapiens OX=9606 GN=HSP90B1 PE=1 SV=1	0	3	3	0.7007	0	1	1	1	742.021	742.021	2224.05	2224.05	0.03	2e-05	0/0	0	0	4961445	HCD	MS2	7.18962	90.584	93.0183	28842	28842	28841	200821_HELA_MGTG_iNrich_bRP_F06.raw	F1.6	NA	1987	5.68	1	FALSE	9.269e-06	4.204e-09	1.839
High	Sequest HT	Sequest HT (A5)	A	5	Unambiguous	DDEVDVDGTVEEDLGKSR	[A].dDEVDVDGTVEEDLGkSR.[E]	1	P14625	P14625	Endoplasmin OS=Homo sapiens OX=9606 GN=HSP90B1 PE=1 SV=1	P14625	Endoplasmin OS=Homo sapiens OX=9606 GN=HSP90B1 PE=1 SV=1	0	2	2	0.6134	0	1	1	1	1112.53	1112.53	2224.05	2224.05	2.1	0.00233	0/0	0	0	1253120	HCD	MS2	0	120	93.0768	28869	28869	28867	200821_HELA_MGTG_iNrich_bRP_F06.raw	F1.6	NA	2115	4.63	1	FALSE	9.269e-06	7.979e-13	2.772
High	Sequest HT	Sequest HT (A5)	A	5	Selected	DDEVDVDGTVEEDLGKSR	[A].dDEVDVDGTVEEDLGkSR.[E]	1	P14625	P14625	Endoplasmin OS=Homo sapiens OX=9606 GN=HSP90B1 PE=1 SV=1	P14625	Endoplasmin OS=Homo sapiens OX=9606 GN=HSP90B1 PE=1 SV=1	0	3	3	0.6496	0	1	1	1	742.022	742.022	2224.05	2224.05	1.03	0.00076	0/0	0	0	2653741	HCD	MS2	18.2089	80.888	93.5314	29064	29064	29062	200821_HELA_MGTG_iNrich_bRP_F06.raw	F1.6	NA	2034	5.48	1	FALSE	9.269e-06	1.623e-08	1.692
High	Sequest HT	Sequest HT (A5)	A	5	Selected	DDEVDVDGTVEEDLGKSR	[A].dDEVDVDGTVEEDLGkSR.[E]	1	P14625	P14625	Endoplasmin OS=Homo sapiens OX=9606 GN=HSP90B1 PE=1 SV=1	P14625	Endoplasmin OS=Homo sapiens OX=9606 GN=HSP90B1 PE=1 SV=1	0	2	2	0.6268	0	1	1	1	1112.53	1112.53	2224.05	2224.05	-0.97	-0.00107	0/0	0	0	1.81521e+06	HCD	MS2	0	120	93.6202	29102	29102	29101	200821_HELA_MGTG_iNrich_bRP_F06.raw	F1.6	NA	1947	4.1	1	FALSE	9.269e-06	1.491e-09	1.952
High	Sequest HT	Sequest HT (A5)	A	5	Selected	DDEVDVDGTVEEDLGKSR	[A].dDEVDVDGTVEEDLGkSR.[E]	1	P14625	P14625	Endoplasmin OS=Homo sapiens OX=9606 GN=HSP90B1 PE=1 SV=1	P14625	Endoplasmin OS=Homo sapiens OX=9606 GN=HSP90B1 PE=1 SV=1	0	3	3	0.6991	0	1	1	1	742.021	742.021	2224.05	2224.05	0.38	0.00028	0/0	0	0	2.06421e+06	HCD	MS2	12.8922	120	94.0524	29284	29284	29283	200821_HELA_MGTG_iNrich_bRP_F06.raw	F1.6	NA	2018	5.65	1	FALSE	9.269e-06	1.139e-07	1.48
High	Sequest HT	Sequest HT (A5)	A	5	Selected	DDEVDVDGTVEEDLGKSR	[A].dDEVDVDGTVEEDLGkSR.[E]	1	P14625	P14625	Endoplasmin OS=Homo sapiens OX=9606 GN=HSP90B1 PE=1 SV=1	P14625	Endoplasmin OS=Homo sapiens OX=9606 GN=HSP90B1 PE=1 SV=1	0	2	2	0.5735	0	1	1	1	1112.53	1112.53	2224.04	2224.05	-1.61	-0.00179	0/0	0	0	1.33374e+06	HCD	MS2	13.3999	120	94.433	29441	29441	29439	200821_HELA_MGTG_iNrich_bRP_F06.raw	F1.6	NA	1918	3.47	1	FALSE	9.269e-06	6.375e-11	2.295
High	Sequest HT	Sequest HT (A5)	A	5	Selected	DDEVDVDGTVEEDLGKSR	[A].dDEVDVDGTVEEDLGkSR.[E]	1	P14625	P14625	Endoplasmin OS=Homo sapiens OX=9606 GN=HSP90B1 PE=1 SV=1	P14625	Endoplasmin OS=Homo sapiens OX=9606 GN=HSP90B1 PE=1 SV=1	0	3	3	0.6742	0	1	1	1	742.021	742.021	2224.05	2224.05	-0.1	-7e-05	0/0	0	0	3129862	HCD	MS2	8.4561	66.067	94.5807	29505	29505	29504	200821_HELA_MGTG_iNrich_bRP_F06.raw	F1.6	NA	1958	5.28	1	FALSE	9.269e-06	4.677e-09	1.827
High	Sequest HT	Sequest HT (A5)	A	5	Selected	DDEVDVDGTVEEDLGKSR	[A].dDEVDVDGTVEEDLGkSR.[E]	1	P14625	P14625	Endoplasmin OS=Homo sapiens OX=9606 GN=HSP90B1 PE=1 SV=1	P14625	Endoplasmin OS=Homo sapiens OX=9606 GN=HSP90B1 PE=1 SV=1	0	2	2	0.4581	0	1	1	1	1112.52	1112.52	2224.04	2224.05	-3.34	-0.00371	0/0	0	0	363055	HCD	MS2	72.0336	120	95.7463	30000	30000	29998	200821_HELA_MGTG_iNrich_bRP_F06.raw	F1.6	NA	1861	3.1	1	FALSE	9.269e-06	2.41e-08	1.649
High	Sequest HT	Sequest HT (A5)	A	5	Selected	DDEVDVDGTVEEDLGKSR	[A].dDEVDVDGTVEEDLGkSR.[E]	1	P14625	P14625	Endoplasmin OS=Homo sapiens OX=9606 GN=HSP90B1 PE=1 SV=1	P14625	Endoplasmin OS=Homo sapiens OX=9606 GN=HSP90B1 PE=1 SV=1	0	3	3	0.7039	0	1	1	1	742.021	742.021	2224.05	2224.05	0.67	0.00049	0/0	0	0	3.30862e+06	HCD	MS2	32.7504	112.994	95.8644	30051	30051	30050	200821_HELA_MGTG_iNrich_bRP_F06.raw	F1.6	NA	2034	5.91	1	FALSE	9.269e-06	3.528e-09	1.858
High	Sequest HT	Sequest HT (A5)	A	5	Unambiguous	DDEVDVDGTVEEDLGKSR	[A].dDEVDVDGTVEEDLGkSR.[E]	1	P14625	P14625	Endoplasmin OS=Homo sapiens OX=9606 GN=HSP90B1 PE=1 SV=1	P14625	Endoplasmin OS=Homo sapiens OX=9606 GN=HSP90B1 PE=1 SV=1	0	3	3	0.7246	0	1	1	1	742.021	742.021	2224.05	2224.05	0.35	0.00026	0/0	0	0	1.34994e+06	HCD	MS2	15.6246	120	96.4416	30303	30303	30297	200821_HELA_MGTG_iNrich_bRP_F06.raw	F1.6	NA	2010	5.52	1	FALSE	9.269e-06	6.277e-09	1.795
High	Sequest HT	Sequest HT (A5)	A	5	Selected	DDEVDVDGTVEEDLGKSR	[A].dDEVDVDGTVEEDLGkSR.[E]	1	P14625	P14625	Endoplasmin OS=Homo sapiens OX=9606 GN=HSP90B1 PE=1 SV=1	P14625	Endoplasmin OS=Homo sapiens OX=9606 GN=HSP90B1 PE=1 SV=1	0	3	3	0.6905	0	1	1	1	742.02	742.02	2224.05	2224.05	-1.13	-0.00084	0/0	0	0	1.43768e+06	HCD	MS2	6.90191	120	97.0885	30574	30574	30570	200821_HELA_MGTG_iNrich_bRP_F06.raw	F1.6	NA	1939	4.62	1	FALSE	9.269e-06	4.43e-08	1.583
High	Sequest HT	Sequest HT (A5)	A	5	Selected	DDEVDVDGTVEEDLGKSR	[A].dDEVDVDGTVEEDLGkSR.[E]	1	P14625	P14625	Endoplasmin OS=Homo sapiens OX=9606 GN=HSP90B1 PE=1 SV=1	P14625	Endoplasmin OS=Homo sapiens OX=9606 GN=HSP90B1 PE=1 SV=1	0	3	3	0.5965	0	1	1	1	742.021	742.021	2224.05	2224.05	0.61	0.00045	0/0	0	0	624290	HCD	MS2	28.6932	120	98.1017	30993	30993	30986	200821_HELA_MGTG_iNrich_bRP_F06.raw	F1.6	NA	2034	4.51	1	FALSE	9.269e-06	5.379e-06	1.06
High	Sequest HT	Sequest HT (A5)	A	5	Selected	DDEVDVDGTVEEDLGKSR	[A].dDEVDVDGTVEEDLGkSR.[E]	1	P14625	P14625	Endoplasmin OS=Homo sapiens OX=9606 GN=HSP90B1 PE=1 SV=1	P14625	Endoplasmin OS=Homo sapiens OX=9606 GN=HSP90B1 PE=1 SV=1	0	2	2	0.5862	0	1	1	1	1112.54	1112.54	2224.06	2224.05	6.9	0.00767	0/0	0	0	457866	HCD	MS2	0	120	98.1406	31008	31008	30999	200821_HELA_MGTG_iNrich_bRP_F06.raw	F1.6	NA	2267	3.19	1	FALSE	7.925e-05	0.0003356	0.598
High	Sequest HT	Sequest HT (A5)	A	5	Selected	DDEVDVDGTVEEDLGKSR	[A].dDEVDVDGTVEEDLGkSR.[E]	1	P14625	P14625	Endoplasmin OS=Homo sapiens OX=9606 GN=HSP90B1 PE=1 SV=1	P14625	Endoplasmin OS=Homo sapiens OX=9606 GN=HSP90B1 PE=1 SV=1	0	3	3	0.6432	0	1	1	1	742.022	742.022	2224.05	2224.05	1.43	0.00106	0/0	0	0	907916	HCD	MS2	15.5556	120	98.6393	31209	31209	31207	200821_HELA_MGTG_iNrich_bRP_F06.raw	F1.6	NA	2058	4.68	1	FALSE	9.269e-06	1.137e-08	1.731
High	Sequest HT	Sequest HT (A5)	A	5	Selected	DDEVDVDGTVEEDLGKSR	[A].dDEVDVDGTVEEDLGkSR.[E]	1	P14625	P14625	Endoplasmin OS=Homo sapiens OX=9606 GN=HSP90B1 PE=1 SV=1	P14625	Endoplasmin OS=Homo sapiens OX=9606 GN=HSP90B1 PE=1 SV=1	0	2	2	0.6364	0	1	1	1	1112.53	1112.53	2224.05	2224.05	-0.24	-0.00027	0/0	0	0	661199	HCD	MS2	0	120	99.1526	31414	31414	31402	200821_HELA_MGTG_iNrich_bRP_F06.raw	F1.6	NA	1948	3.96	1	FALSE	9.269e-06	1.093e-12	2.738
High	Sequest HT	Sequest HT (A5)	A	5	Selected	DDEVDVDGTVEEDLGKSR	[A].dDEVDVDGTVEEDLGkSR.[E]	1	P14625	P14625	Endoplasmin OS=Homo sapiens OX=9606 GN=HSP90B1 PE=1 SV=1	P14625	Endoplasmin OS=Homo sapiens OX=9606 GN=HSP90B1 PE=1 SV=1	0	3	3	0.7259	0	1	1	1	742.02	742.02	2224.05	2224.05	-0.71	-0.00053	0/0	0	0	3.63344e+06	HCD	MS2	14.447	47.355	99.1591	31416	31416	31415	200821_HELA_MGTG_iNrich_bRP_F06.raw	F1.6	NA	1936	5.8	1	FALSE	9.269e-06	3.846e-10	2.1
High	Sequest HT	Sequest HT (A5)	A	5	Unambiguous	DDEVDVDGTVEEDLGKSR	[A].dDEVDVDGTVEEDLGkSR.[E]	1	P14625	P14625	Endoplasmin OS=Homo sapiens OX=9606 GN=HSP90B1 PE=1 SV=1	P14625	Endoplasmin OS=Homo sapiens OX=9606 GN=HSP90B1 PE=1 SV=1	0	3	3	0.6362	0	1	1	1	742.021	742.021	2224.05	2224.05	0.6	0.00044	0/0	0	0	1.90031e+06	HCD	MS2	53.1287	48.643	99.838	31692	31692	31688	200821_HELA_MGTG_iNrich_bRP_F06.raw	F1.6	NA	2034	4.48	1	FALSE	9.269e-06	5.143e-07	1.315
High	Sequest HT	Sequest HT (A5)	A	5	Selected	DDEVDVDGTVEEDLGKSR	[A].dDEVDVDGTVEEDLGkSR.[E]	1	P14625	P14625	Endoplasmin OS=Homo sapiens OX=9606 GN=HSP90B1 PE=1 SV=1	P14625	Endoplasmin OS=Homo sapiens OX=9606 GN=HSP90B1 PE=1 SV=1	0	2	2	0.5522	0	1	1	1	1112.53	1112.53	2224.05	2224.05	0.08	9e-05	0/0	0	0	447801	HCD	MS2	23.2336	120	99.8795	31709	31709	31701	200821_HELA_MGTG_iNrich_bRP_F06.raw	F1.6	NA	1987	3.35	1	FALSE	9.269e-06	2.217e-07	1.407
High	Sequest HT	Sequest HT (A5)	A	5	Selected	DDEVDVDGTVEEDLGKSR	[A].dDEVDVDGTVEEDLGkSR.[E]	1	P14625	P14625	Endoplasmin OS=Homo sapiens OX=9606 GN=HSP90B1 PE=1 SV=1	P14625	Endoplasmin OS=Homo sapiens OX=9606 GN=HSP90B1 PE=1 SV=1	0	3	3	0.6321	0	1	1	1	742.022	742.022	2224.05	2224.05	0.92	0.00068	0/0	0	0	1.00739e+06	HCD	MS2	36.7955	120	100.543	31978	31978	31974	200821_HELA_MGTG_iNrich_bRP_F06.raw	F1.6	NA	2031	5.3	1	FALSE	9.269e-06	3.173e-08	1.619
High	Sequest HT	Sequest HT (A5)	A	5	Selected	DDEVDVDGTVEEDLGKSR	[A].dDEVDVDGTVEEDLGkSR.[E]	1	P14625	P14625	Endoplasmin OS=Homo sapiens OX=9606 GN=HSP90B1 PE=1 SV=1	P14625	Endoplasmin OS=Homo sapiens OX=9606 GN=HSP90B1 PE=1 SV=1	0	2	2	0.6313	0	1	1	1	1112.53	1112.53	2224.05	2224.05	0.18	0.0002	0/0	0	0	913266	HCD	MS2	0	120	100.606	32002	32002	32000	200821_HELA_MGTG_iNrich_bRP_F06.raw	F1.6	NA	2002	3.58	1	FALSE	9.269e-06	1.015e-09	1.994
High	Sequest HT	Sequest HT (A5)	A	5	Selected	DDEVDVDGTVEEDLGKSR	[A].dDEVDVDGTVEEDLGkSR.[E]	1	P14625	P14625	Endoplasmin OS=Homo sapiens OX=9606 GN=HSP90B1 PE=1 SV=1	P14625	Endoplasmin OS=Homo sapiens OX=9606 GN=HSP90B1 PE=1 SV=1	0	3	3	0.723	0	1	1	1	742.021	742.021	2224.05	2224.05	-0.08	-6e-05	0/0	0	0	1.41711e+06	HCD	MS2	42.4323	120	101.123	32206	32206	32195	200821_HELA_MGTG_iNrich_bRP_F06.raw	F1.6	NA	1987	5.56	1	FALSE	9.269e-06	3.123e-08	1.621
High	Sequest HT	Sequest HT (A5)	A	5	Selected	DDEVDVDGTVEEDLGKSR	[A].dDEVDVDGTVEEDLGkSR.[E]	1	P14625	P14625	Endoplasmin OS=Homo sapiens OX=9606 GN=HSP90B1 PE=1 SV=1	P14625	Endoplasmin OS=Homo sapiens OX=9606 GN=HSP90B1 PE=1 SV=1	0	3	3	0.666	0	1	1	1	742.022	742.022	2224.05	2224.05	1.22	0.0009	0/0	0	0	491396	HCD	MS2	21.0405	120	101.665	32423	32423	32416	200821_HELA_MGTG_iNrich_bRP_F06.raw	F1.6	NA	2052	4.73	1	FALSE	9.269e-06	3.763e-06	1.099
High	Sequest HT	Sequest HT (A5)	A	5	Selected	DDEVDVDGTVEEDLGKSR	[A].dDEVDVDGTVEEDLGkSR.[E]	1	P14625	P14625	Endoplasmin OS=Homo sapiens OX=9606 GN=HSP90B1 PE=1 SV=1	P14625	Endoplasmin OS=Homo sapiens OX=9606 GN=HSP90B1 PE=1 SV=1	0	3	3	0.5994	0	1	1	1	742.022	742.022	2224.05	2224.05	1.12	0.00083	0/0	0	0	725697	HCD	MS2	47.748	106.783	102.148	32612	32612	32611	200821_HELA_MGTG_iNrich_bRP_F06.raw	F1.6	NA	2047	3.42	1	FALSE	9.269e-06	1.389e-07	1.458
High	Sequest HT	Sequest HT (A5)	A	5	Selected	DDEVDVDGTVEEDLGKSR	[A].dDEVDVDGTVEEDLGkSR.[E]	1	P14625	P14625	Endoplasmin OS=Homo sapiens OX=9606 GN=HSP90B1 PE=1 SV=1	P14625	Endoplasmin OS=Homo sapiens OX=9606 GN=HSP90B1 PE=1 SV=1	0	3	3	0.641	0	1	1	1	742.022	742.022	2224.05	2224.05	1.68	0.00124	0/0	0	0	1.22569e+06	HCD	MS2	43.2732	120	102.791	32868	32868	32858	200821_HELA_MGTG_iNrich_bRP_F06.raw	F1.6	NA	2099	5.07	1	FALSE	9.269e-06	9.258e-08	1.502
High	Sequest HT	Sequest HT (A5)	A	5	Selected	DDEVDVDGTVEEDLGKSR	[A].dDEVDVDGTVEEDLGkSR.[E]	1	P14625	P14625	Endoplasmin OS=Homo sapiens OX=9606 GN=HSP90B1 PE=1 SV=1	P14625	Endoplasmin OS=Homo sapiens OX=9606 GN=HSP90B1 PE=1 SV=1	0	3	3	0.6648	0	1	1	1	742.021	742.021	2224.05	2224.05	0.71	0.00052	0/0	0	0	1.29179e+06	HCD	MS2	16.2479	120	104.259	33452	33452	33443	200821_HELA_MGTG_iNrich_bRP_F06.raw	F1.6	NA	2036	5.37	1	FALSE	9.269e-06	2.119e-08	1.663
High	Sequest HT	Sequest HT (A5)	A	5	Unambiguous	DDEVDVDGTVEEDLGKSR	[A].dDEVDVDGTVEEDLGkSR.[E]	1	P14625	P14625	Endoplasmin OS=Homo sapiens OX=9606 GN=HSP90B1 PE=1 SV=1	P14625	Endoplasmin OS=Homo sapiens OX=9606 GN=HSP90B1 PE=1 SV=1	0	3	3	0.58	0	1	1	1	742.019	742.019	2224.04	2224.05	-2.55	-0.00189	0/0	0	0	578358	HCD	MS2	13.7181	120	105.28	33858	33858	33852	200821_HELA_MGTG_iNrich_bRP_F06.raw	F1.6	NA	1877	4.5	1	FALSE	9.269e-06	2.504e-06	1.143
High	Sequest HT	Sequest HT (A5)	A	5	Unambiguous	DDEVDVDGTVEEDLGKSR	[A].dDEVDVDGTVEEDLGkSR.[E]	1	P14625	P14625	Endoplasmin OS=Homo sapiens OX=9606 GN=HSP90B1 PE=1 SV=1	P14625	Endoplasmin OS=Homo sapiens OX=9606 GN=HSP90B1 PE=1 SV=1	0	2	2	0.5927	0	1	1	1	1112.53	1112.53	2224.05	2224.05	2.63	0.00293	0/0	0	0	503768	HCD	MS2	0	120	105.448	33923	33923	33917	200821_HELA_MGTG_iNrich_bRP_F06.raw	F1.6	NA	2125	2.75	1	FALSE	0.0002752	0.001967	0.412
High	Sequest HT	Sequest HT (A5)	A	5	Selected	DDEVDVDGTVEEDLGKSR	[A].dDEVDVDGTVEEDLGkSR.[E]	1	P14625	P14625	Endoplasmin OS=Homo sapiens OX=9606 GN=HSP90B1 PE=1 SV=1	P14625	Endoplasmin OS=Homo sapiens OX=9606 GN=HSP90B1 PE=1 SV=1	0	3	3	0.6557	0	1	1	1	742.021	742.021	2224.05	2224.05	0.52	0.00039	0/0	0	0	1.38759e+06	HCD	MS2	30.3303	120	108.41	35097	35097	35090	200821_HELA_MGTG_iNrich_bRP_F06.raw	F1.6	NA	2032	4.27	1	FALSE	9.269e-06	1.946e-05	0.919
High	Sequest HT	Sequest HT (A5)	A	5	Selected	DDEVDVDGTVEEDLGKSR	[A].dDEVDVDGTVEEDLGkSR.[E]	1	P14625	P14625	Endoplasmin OS=Homo sapiens OX=9606 GN=HSP90B1 PE=1 SV=1	P14625	Endoplasmin OS=Homo sapiens OX=9606 GN=HSP90B1 PE=1 SV=1	0	3	3	0.644	0	1	1	1	742.02	742.02	2224.05	2224.05	-1.15	-0.00085	0/0	0	0	478233	HCD	MS2	13.0135	120	109.105	35372	35372	35365	200821_HELA_MGTG_iNrich_bRP_F06.raw	F1.6	NA	1937	4.55	1	FALSE	9.269e-06	5.952e-07	1.3
High	Sequest HT	Sequest HT (A5)	A	5	Selected	DDEVDVDGTVEEDLGKSR	[A].dDEVDVDGTVEEDLGkSR.[E]	1	P14625	P14625	Endoplasmin OS=Homo sapiens OX=9606 GN=HSP90B1 PE=1 SV=1	P14625	Endoplasmin OS=Homo sapiens OX=9606 GN=HSP90B1 PE=1 SV=1	0	3	3	0.6615	0	1	1	1	742.022	742.022	2224.05	2224.05	1.28	0.00095	0/0	0	0	455975	HCD	MS2	34.2184	120	112.138	36575	36575	36563	200821_HELA_MGTG_iNrich_bRP_F06.raw	F1.6	NA	2053	3.84	1	FALSE	9.269e-06	6.546e-06	1.038
High	Sequest HT	Sequest HT (A5)	A	5	Unambiguous	DDEVDVDGTVEEDLGKSR	[A].dDEVDVDGTVEEDLGkSR.[E]	1	P14625	P14625	Endoplasmin OS=Homo sapiens OX=9606 GN=HSP90B1 PE=1 SV=1	P14625	Endoplasmin OS=Homo sapiens OX=9606 GN=HSP90B1 PE=1 SV=1	0	3	3	0.3966	0	1	1	1	742.026	742.026	2224.06	2224.05	6.49	0.00481	0/0	0	0	386771	HCD	MS2	49.5186	120	114.227	37383	37383	37371	200821_HELA_MGTG_iNrich_bRP_F06.raw	F1.6	NA	2230	3.48	1	FALSE	0.0003652	0.002866	0.374
High	Sequest HT	Sequest HT (A5)	A	5	Selected	DDEVDVDGTVEEDLGKSR	[A].dDEVDVDGTVEEDLGkSR.[E]	1	P14625	P14625	Endoplasmin OS=Homo sapiens OX=9606 GN=HSP90B1 PE=1 SV=1	P14625	Endoplasmin OS=Homo sapiens OX=9606 GN=HSP90B1 PE=1 SV=1	0	2	2	0.5979	0	1	1	1	1112.53	1112.53	2224.04	2224.05	-1.53	-0.0017	0/0	0	0	431971	HCD	MS2	0	120	90.4406	28504	28504	28502	200821_HELA_MGTG_iNrich_bRP_F07.raw	F1.7	NA	1926	2.91	1	FALSE	9.269e-06	1.656e-06	1.188
High	Sequest HT	Sequest HT (A5)	A	5	Unambiguous	DDEVDVDGTVEEDLGKSR	[A].dDEVDVDGTVEEDLGkSR.[E]	1	P14625	P14625	Endoplasmin OS=Homo sapiens OX=9606 GN=HSP90B1 PE=1 SV=1	P14625	Endoplasmin OS=Homo sapiens OX=9606 GN=HSP90B1 PE=1 SV=1	0	3	3	0.6317	0	1	1	1	742.021	742.021	2224.05	2224.05	0.36	0.00026	0/0	0	0	530197	HCD	MS2	35.998	120	90.6778	28602	28602	28593	200821_HELA_MGTG_iNrich_bRP_F07.raw	F1.7	NA	2010	4.29	1	FALSE	9.269e-06	1.804e-06	1.179
High	Sequest HT	Sequest HT (A5)	A	5	Unambiguous	DDEVDVDGTVEEDLGKSR	[A].dDEVDVDGTVEEDLGkSR.[E]	1	P14625	P14625	Endoplasmin OS=Homo sapiens OX=9606 GN=HSP90B1 PE=1 SV=1	P14625	Endoplasmin OS=Homo sapiens OX=9606 GN=HSP90B1 PE=1 SV=1	0	3	3	0.6253	0	1	1	1	742.019	742.019	2224.04	2224.05	-2.78	-0.00206	0/0	0	0	719190	HCD	MS2	33.1354	120	91.578	28976	28976	28970	200821_HELA_MGTG_iNrich_bRP_F07.raw	F1.7	NA	1889	4.03	1	FALSE	9.269e-06	2.23e-05	0.904
High	Sequest HT	Sequest HT (A5)	A	5	Unambiguous	DVDGTVEEDLGKSR	[V].dVDGTVEEDLGkSR.[E]	1	P14625	P14625	Endoplasmin OS=Homo sapiens OX=9606 GN=HSP90B1 PE=1 SV=1	P14625	Endoplasmin OS=Homo sapiens OX=9606 GN=HSP90B1 PE=1 SV=1	0	2	2	0.6133	0	1	1	1	883.446	883.446	1765.88	1765.88	0.63	0.00056	0/0	0	0	1.14866e+06	HCD	MS2	5.83879	120	79.7606	23313	23313	23308	200821_HELA_MGTG_iNrich_bRP_F10.raw	F1.10	NA	2527	3.31	1	FALSE	9.269e-06	8.648e-08	1.51
High	Sequest HT	Sequest HT (A5)	A	5	Selected	DDEVDVDGTVEEDLGKSR	[A].dDEVDVDGTVEEDLGkSR.[E]	1	P14625	P14625	Endoplasmin OS=Homo sapiens OX=9606 GN=HSP90B1 PE=1 SV=1	P14625	Endoplasmin OS=Homo sapiens OX=9606 GN=HSP90B1 PE=1 SV=1	0	3	3	0.6502	0	1	1	1	742.02	742.02	2224.05	2224.05	-1.15	-0.00086	0/0	0	0	2.01007e+06	HCD	MS2	25.6665	120	86.8444	26315	26315	26307	200821_HELA_MGTG_iNrich_bRP_F10.raw	F1.10	NA	1940	4.86	1	FALSE	9.269e-06	4.556e-06	1.078
High	Sequest HT	Sequest HT (A5)	A	5	Unambiguous	EVDVDGTVEEDLGKSR	[D].eVDVDGTVEEDLGkSR.[E]	1	P14625	P14625	Endoplasmin OS=Homo sapiens OX=9606 GN=HSP90B1 PE=1 SV=1	P14625	Endoplasmin OS=Homo sapiens OX=9606 GN=HSP90B1 PE=1 SV=1	0	3	3	0.6193	0	1	1	1	665.337	665.337	1994	1993.99	0.67	0.00045	0/0	0	0	3.23243e+06	HCD	MS2	32.9717	86.3	86.5916	26747	26747	26738	200821_HELA_MGTG_iNrich_bRP_F11.raw	F1.11	NA	2790	5.28	1	FALSE	9.269e-06	2.585e-06	1.14
High	Sequest HT	Sequest HT (A5)	A	5	Unambiguous	EVDVDGTVEEDLGKSR	[D].eVDVDGTVEEDLGkSR.[E]	1	P14625	P14625	Endoplasmin OS=Homo sapiens OX=9606 GN=HSP90B1 PE=1 SV=1	P14625	Endoplasmin OS=Homo sapiens OX=9606 GN=HSP90B1 PE=1 SV=1	0	2	2	0.611	0	1	1	1	997.5	997.5	1993.99	1993.99	-0.64	-0.00064	0/0	0	0	3017377	HCD	MS2	0	99.777	86.673	26780	26780	26777	200821_HELA_MGTG_iNrich_bRP_F11.raw	F1.11	NA	2744	4.73	1	FALSE	9.269e-06	1.26e-12	2.723
High	Sequest HT	Sequest HT (A5)	A	5	Unambiguous	EVDVDGTVEEDLGKSR	[D].eVDVDGTVEEDLGkSR.[E]	1	P14625	P14625	Endoplasmin OS=Homo sapiens OX=9606 GN=HSP90B1 PE=1 SV=1	P14625	Endoplasmin OS=Homo sapiens OX=9606 GN=HSP90B1 PE=1 SV=1	0	3	3	0.5658	0	1	1	1	665.338	665.338	1994	1993.99	2.22	0.00148	0/0	0	0	1.61219e+06	HCD	MS2	14.181	53.968	87.1285	26973	26973	26972	200821_HELA_MGTG_iNrich_bRP_F11.raw	F1.11	NA	2769	4.56	1	FALSE	9.269e-06	8.054e-06	1.016
High	Sequest HT	Sequest HT (A5)	A	5	Selected	EVDVDGTVEEDLGKSR	[D].eVDVDGTVEEDLGkSR.[E]	1	P14625	P14625	Endoplasmin OS=Homo sapiens OX=9606 GN=HSP90B1 PE=1 SV=1	P14625	Endoplasmin OS=Homo sapiens OX=9606 GN=HSP90B1 PE=1 SV=1	0	2	2	0.4363	0	1	1	1	997.5	997.5	1993.99	1993.99	-0.65	-0.00065	0/0	0	0	469129	HCD	MS2	0	120	87.2703	27032	27032	27024	200821_HELA_MGTG_iNrich_bRP_F11.raw	F1.11	NA	2744	3.14	1	FALSE	1.762e-05	5.157e-05	0.811
High	Sequest HT	Sequest HT (A5)	A	5	Unambiguous	DVDGTVEEDLGKSR	[V].dVDGTVEEDLGkSR.[E]	1	P14625	P14625	Endoplasmin OS=Homo sapiens OX=9606 GN=HSP90B1 PE=1 SV=1	P14625	Endoplasmin OS=Homo sapiens OX=9606 GN=HSP90B1 PE=1 SV=1	0	2	2	0.5528	0	1	1	1	883.452	883.451	1765.9	1765.88	7.44	0.00657	0/0	0	0	3.83452e+06	HCD	MS2	22.8483	55.181	67.0817	28938	28938	28928	220621_E_201.raw	F6.1	NA	2534	4.45	1	FALSE	9.269e-06	4.71e-09	1.827
High	Sequest HT	Sequest HT (A5)	A	5	Unambiguous	DVDGTVEEDLGKSR	[V].dVDGTVEEDLGkSR.[E]	1	P14625	P14625	Endoplasmin OS=Homo sapiens OX=9606 GN=HSP90B1 PE=1 SV=1	P14625	Endoplasmin OS=Homo sapiens OX=9606 GN=HSP90B1 PE=1 SV=1	0	2	2	0.625	0	1	1	1	883.45	883.45	1765.89	1765.88	5.66	0.005	0/0	0	0	1.85599e+06	HCD	MS2	0	98.247	68.3394	27924	27924	27914	220621_E_301.raw	F7.1	NA	2508	4.08	1	FALSE	9.269e-06	3.051e-07	1.372
High	Sequest HT	Sequest HT (A5)	A	5	Selected	DVDGTVEEDLGKSR	[V].dVDGTVEEDLGkSR.[E]	1	P14625	P14625	Endoplasmin OS=Homo sapiens OX=9606 GN=HSP90B1 PE=1 SV=1	P14625	Endoplasmin OS=Homo sapiens OX=9606 GN=HSP90B1 PE=1 SV=1	0	3	0	0.3182	0	1	1	1	589.299	589.299	1765.88	1765.88	0.11	7e-05	0/0	0	0	3.54793e+06	HCD	MS2	86.6264	9.349	68.4399	27978	27978	27966	220621_E_301.raw	F7.1	NA	2388	2.86	1	FALSE	0.005095	0.04783	0.076
High	Sequest HT	Sequest HT (A5)	A	5	Unambiguous	EVDVDGTVEEDLGKSR	[D].eVDVDGTVEEDLGkSR.[E]	1	P14625	P14625	Endoplasmin OS=Homo sapiens OX=9606 GN=HSP90B1 PE=1 SV=1	P14625	Endoplasmin OS=Homo sapiens OX=9606 GN=HSP90B1 PE=1 SV=1	0	3	3	0.479	0	1	1	1	665.339	665.339	1994	1993.99	3.48	0.00231	0/0	0	0	3.89944e+06	HCD	MS2	10.9998	27.766	73.7371	29788	29788	29786	220621_E_302.raw	F7.2	NA	2789	4.53	1	FALSE	1.762e-05	6.344e-05	0.787
High	Sequest HT	Sequest HT (A5)	A	5	Unambiguous	EVDVDGTVEEDLGKSR	[D].eVDVDGTVEEDLGkSR.[E]	1	P14625	P14625	Endoplasmin OS=Homo sapiens OX=9606 GN=HSP90B1 PE=1 SV=1	P14625	Endoplasmin OS=Homo sapiens OX=9606 GN=HSP90B1 PE=1 SV=1	0	2	2	0.5479	0	1	1	1	997.505	997.505	1994	1993.99	3.88	0.00387	0/0	0	0	2.76609e+06	HCD	MS2	25.4269	107	73.7823	29811	29811	29799	220621_E_302.raw	F7.2	NA	2768	4.07	1	FALSE	9.269e-06	2.992e-06	1.124
High	Sequest HT	Sequest HT (A5)	A	5	Unambiguous	EVDVDGTVEEDLGKSR	[D].eVDVDGTVEEDLGkSR.[E]	1	P14625	P14625	Endoplasmin OS=Homo sapiens OX=9606 GN=HSP90B1 PE=1 SV=1	P14625	Endoplasmin OS=Homo sapiens OX=9606 GN=HSP90B1 PE=1 SV=1	0	3	3	0.5143	0	1	1	1	665.336	665.336	1993.99	1993.99	-0.51	-0.00034	0/0	0	0	3.85862e+06	HCD	MS2	43.3467	32.92	76.3379	31142	31142	31138	220621_E_302.raw	F7.2	NA	2756	4.88	1	FALSE	9.269e-06	9.059e-06	1.003
High	Sequest HT	Sequest HT (A5)	A	5	Unambiguous	EVDVDGTVEEDLGKSR	[D].eVDVDGTVEEDLGkSR.[E]	1	P14625	P14625	Endoplasmin OS=Homo sapiens OX=9606 GN=HSP90B1 PE=1 SV=1	P14625	Endoplasmin OS=Homo sapiens OX=9606 GN=HSP90B1 PE=1 SV=1	0	2	0	0.5876	0	1	1	1	997.501	997.501	1994	1993.99	0.39	0.00038	0/0	0	0	4.10871e+06	HCD	MS2	40.2923	74.851	76.4003	31174	31174	31164	220621_E_302.raw	F7.2	NA	2766	4.85	1	FALSE	9.269e-06	9.474e-14	3.005
High	Sequest HT	Sequest HT (A5)	A	5	Selected	EVDVDGTVEEDLGKSR	[D].eVDVDGTVEEDLGkSR.[E]	1	P14625	P14625	Endoplasmin OS=Homo sapiens OX=9606 GN=HSP90B1 PE=1 SV=1	P14625	Endoplasmin OS=Homo sapiens OX=9606 GN=HSP90B1 PE=1 SV=1	0	3	3	0.5502	0	1	1	1	665.336	665.336	1993.99	1993.99	0.05	4e-05	0/0	0	0	11853334	HCD	MS2	26.2261	10.547	76.5322	31241	31241	31229	220621_E_302.raw	F7.2	NA	2741	4.78	1	FALSE	9.269e-06	3.043e-05	0.87
High	Sequest HT	Sequest HT (A5)	A	5	Unambiguous	EVDVDGTVEEDLGKSR	[D].eVDVDGTVEEDLGkSR.[E]	1	P14625	P14625	Endoplasmin OS=Homo sapiens OX=9606 GN=HSP90B1 PE=1 SV=1	P14625	Endoplasmin OS=Homo sapiens OX=9606 GN=HSP90B1 PE=1 SV=1	0	3	3	0.4706	0	1	1	1	665.336	665.336	1993.99	1993.99	-0.13	-8e-05	0/0	0	0	7.9458e+06	HCD	MS2	47.3842	20.839	76.5715	31262	31262	31255	220621_E_302.raw	F7.2	NA	2751	4.25	1	FALSE	3.982e-05	0.0001392	0.697
High	Sequest HT	Sequest HT (A5)	A	5	Unambiguous	DDEVDVDGTVEEDLGKSR	[A].dDEVDVDGTVEEDLGkSR.[E]	1	P14625	P14625	Endoplasmin OS=Homo sapiens OX=9606 GN=HSP90B1 PE=1 SV=1	P14625	Endoplasmin OS=Homo sapiens OX=9606 GN=HSP90B1 PE=1 SV=1	0	2	2	0.6525	0	1	1	1	1112.53	1112.53	2224.05	2224.05	2.71	0.00301	0/0	0	0	274757	HCD	MS2	0	120	69.9049	24523	24523	24513	220621_E_310.raw	F7.10	NA	2120	3.05	1	FALSE	9.269e-06	4.142e-06	1.088
High	Sequest HT	Sequest HT (A5)	A	5	Selected	DDEVDVDGTVEEDLGKSR	[A].dDEVDVDGTVEEDLGkSR.[E]	1	P14625	P14625	Endoplasmin OS=Homo sapiens OX=9606 GN=HSP90B1 PE=1 SV=1	P14625	Endoplasmin OS=Homo sapiens OX=9606 GN=HSP90B1 PE=1 SV=1	0	2	2	0.5627	0	1	1	1	1112.53	1112.53	2224.05	2224.05	0.02	3e-05	0/0	0	0	690676	HCD	MS2	19.1855	120	74.919	26603	26603	26593	220621_E_310.raw	F7.10	NA	1985	2.95	1	FALSE	9.269e-06	7.402e-06	1.025
High	Sequest HT	Sequest HT (A5)	A	5	Selected	DDEVDVDGTVEEDLGKSR	[A].dDEVDVDGTVEEDLGkSR.[E]	1	P14625	P14625	Endoplasmin OS=Homo sapiens OX=9606 GN=HSP90B1 PE=1 SV=1	P14625	Endoplasmin OS=Homo sapiens OX=9606 GN=HSP90B1 PE=1 SV=1	0	3	3	0.6803	0	1	1	1	742.021	742.021	2224.05	2224.05	-0.54	-0.0004	0/0	0	0	1.08096e+06	HCD	MS2	9.04185	120	78.0344	27870	27870	27867	220621_E_310.raw	F7.10	NA	1938	5.13	1	FALSE	9.269e-06	2.037e-09	1.918
High	Sequest HT	Sequest HT (A5)	A	5	Unambiguous	DDEVDVDGTVEEDLGKSR	[A].dDEVDVDGTVEEDLGkSR.[E]	1	P14625	P14625	Endoplasmin OS=Homo sapiens OX=9606 GN=HSP90B1 PE=1 SV=1	P14625	Endoplasmin OS=Homo sapiens OX=9606 GN=HSP90B1 PE=1 SV=1	0	2	2	0.6368	0	1	1	1	1112.53	1112.53	2224.05	2224.05	1.46	0.00163	0/0	0	0	955777	HCD	MS2	0	120	78.1004	27896	27896	27893	220621_E_310.raw	F7.10	NA	2056	3.91	1	FALSE	9.269e-06	1.613e-10	2.194
High	Sequest HT	Sequest HT (A5)	A	5	Selected	DDEVDVDGTVEEDLGKSR	[A].dDEVDVDGTVEEDLGkSR.[E]	1	P14625	P14625	Endoplasmin OS=Homo sapiens OX=9606 GN=HSP90B1 PE=1 SV=1	P14625	Endoplasmin OS=Homo sapiens OX=9606 GN=HSP90B1 PE=1 SV=1	0	3	3	0.6936	0	1	1	1	742.02	742.02	2224.04	2224.05	-1.63	-0.00121	0/0	0	0	1197028	HCD	MS2	25.0415	120	78.6062	28105	28105	28101	220621_E_310.raw	F7.10	NA	1914	5.19	1	FALSE	9.269e-06	6.131e-09	1.798
High	Sequest HT	Sequest HT (A5)	A	5	Selected	DDEVDVDGTVEEDLGKSR	[A].dDEVDVDGTVEEDLGkSR.[E]	1	P14625	P14625	Endoplasmin OS=Homo sapiens OX=9606 GN=HSP90B1 PE=1 SV=1	P14625	Endoplasmin OS=Homo sapiens OX=9606 GN=HSP90B1 PE=1 SV=1	0	3	3	0.6989	0	1	1	1	742.021	742.021	2224.05	2224.05	-0.57	-0.00042	0/0	0	0	1.27686e+06	HCD	MS2	41.2737	120	79.2224	28377	28377	28374	220621_E_310.raw	F7.10	NA	1938	4.65	1	FALSE	9.269e-06	4.426e-09	1.833
High	Sequest HT	Sequest HT (A5)	A	5	Selected	DDEVDVDGTVEEDLGKSR	[A].dDEVDVDGTVEEDLGkSR.[E]	1	P14625	P14625	Endoplasmin OS=Homo sapiens OX=9606 GN=HSP90B1 PE=1 SV=1	P14625	Endoplasmin OS=Homo sapiens OX=9606 GN=HSP90B1 PE=1 SV=1	0	2	2	0.5593	0	1	1	1	1112.52	1112.52	2224.04	2224.05	-4.27	-0.00475	0/0	0	0	536527	HCD	MS2	0	120	79.3845	28447	28447	28439	220621_E_310.raw	F7.10	NA	1817	2.95	1	FALSE	9.269e-06	3.515e-05	0.854
High	Sequest HT	Sequest HT (A5)	A	5	Selected	EVDVDGTVEEDLGKSR	[D].eVDVDGTVEEDLGkSR.[E]	1	P14625	P14625	Endoplasmin OS=Homo sapiens OX=9606 GN=HSP90B1 PE=1 SV=1	P14625	Endoplasmin OS=Homo sapiens OX=9606 GN=HSP90B1 PE=1 SV=1	0	2	2	0.5	0	1	1	1	997.501	997.501	1993.99	1993.99	0.26	0.00025	0/0	0	0	867445	HCD	MS2	0	120	73.5136	28429	28429	28421	220428_iNrich_HELA_MG132_Trypsin_01.raw	F12.1	NA	2737	3.46	1	FALSE	9.269e-06	1.33e-05	0.961
High	Sequest HT	Sequest HT (A5)	A	5	Unambiguous	EVDVDGTVEEDLGKSR	[D].eVDVDGTVEEDLGkSR.[E]	1	P14625	P14625	Endoplasmin OS=Homo sapiens OX=9606 GN=HSP90B1 PE=1 SV=1	P14625	Endoplasmin OS=Homo sapiens OX=9606 GN=HSP90B1 PE=1 SV=1	0	3	3	0.3255	0	1	1	1	665.337	665.337	1994	1993.99	1.44	0.00096	0/0	0	0	1.42944e+06	HCD	MS2	41.8187	54.11	73.5623	28450	28450	28447	220428_iNrich_HELA_MG132_Trypsin_01.raw	F12.1	NA	2792	3.41	1	FALSE	9.269e-06	2.063e-06	1.164
High	Sequest HT	Sequest HT (A5)	A	5	Selected	DDEVDVDGTVEEDLGKSR	[A].dDEVDVDGTVEEDLGkSR.[E]	1	P14625	P14625	Endoplasmin OS=Homo sapiens OX=9606 GN=HSP90B1 PE=1 SV=1	P14625	Endoplasmin OS=Homo sapiens OX=9606 GN=HSP90B1 PE=1 SV=1	0	3	3	0.6458	0	1	1	1	742.021	742.021	2224.05	2224.05	-0.42	-0.00031	0/0	0	0	2.08615e+06	HCD	MS2	12.2553	88.696	77.69	29569	29569	29565	220428_iNrich_HELA_MG132_Trypsin_09.raw	F12.9	NA	1945	5.28	1	FALSE	9.269e-06	4.079e-08	1.592
High	Sequest HT	Sequest HT (A5)	A	5	Selected	DDEVDVDGTVEEDLGKSR	[A].dDEVDVDGTVEEDLGkSR.[E]	1	P14625	P14625	Endoplasmin OS=Homo sapiens OX=9606 GN=HSP90B1 PE=1 SV=1	P14625	Endoplasmin OS=Homo sapiens OX=9606 GN=HSP90B1 PE=1 SV=1	0	2	2	0.622	0	1	1	1	1112.53	1112.53	2224.05	2224.05	-0.17	-0.00019	0/0	0	0	2106658	HCD	MS2	0	119.41	77.7461	29596	29596	29591	220428_iNrich_HELA_MG132_Trypsin_09.raw	F12.9	NA	1949	4.55	1	FALSE	9.269e-06	1.582e-11	2.447
High	Sequest HT	Sequest HT (A5)	A	5	Unambiguous	DVDGTVEEDLGKSR	[V].dVDGTVEEDLGkSR.[E]	1	P14625	P14625	Endoplasmin OS=Homo sapiens OX=9606 GN=HSP90B1 PE=1 SV=1	P14625	Endoplasmin OS=Homo sapiens OX=9606 GN=HSP90B1 PE=1 SV=1	0	2	2	0.5664	0	1	1	1	883.448	883.448	1765.89	1765.88	2.68	0.00236	0/0	0	0	1.14548e+06	HCD	MS2	0	120	65.4826	23300	23300	23299	220428_iNrich_HELA_MG132_Trypsin_12.raw	F12.12	NA	2509	3.39	1	FALSE	9.269e-06	4.525e-05	0.825
High	Sequest HT	Sequest HT (A5)	A	5	Selected	EDEVEEWQHR	[K].eDEVEEWQHR.[A]	1	P15311	P15311	Ezrin OS=Homo sapiens OX=9606 GN=EZR PE=1 SV=4	P15311	Ezrin OS=Homo sapiens OX=9606 GN=EZR PE=1 SV=4	0	2	2	0.395	0	1	1	1	779.357	779.357	1557.71	1557.71	-3.04	-0.00237	0/0	0	0	2162256	HCD	MS2	10.9397	85.227	77.8327	22452	22452	22447	200821_HELA_MGTG_iNrich_bRP_F06.raw	F1.6	NA	1227	2	1	FALSE	0.001135	0.01007	0.248
High	Sequest HT	Sequest HT (A5)	A	5	Unambiguous	EKDKHIEEVRK	[R].ekDkHIEEVRk.[N]	1	P16949	P16949	Stathmin OS=Homo sapiens OX=9606 GN=STMN1 PE=1 SV=3	P16949	Stathmin OS=Homo sapiens OX=9606 GN=STMN1 PE=1 SV=3	1	3	3	0.4369	0	1	1	1	583.001	583.001	1746.99	1746.99	0.37	0.00021	0/0	0	0	4504527	HCD	MS2	36.6831	11.704	50.1851	19168	19168	19165	220621_E_204.raw	F6.4	NA	1374	2.93	1	FALSE	0.0003001	0.002158	0.403
High	Sequest HT	Sequest HT (A5)	A	5	Unambiguous	EKDKHIEEVRK	[R].ekDkHIEEVRk.[N]	1	P16949	P16949	Stathmin OS=Homo sapiens OX=9606 GN=STMN1 PE=1 SV=3	P16949	Stathmin OS=Homo sapiens OX=9606 GN=STMN1 PE=1 SV=3	1	3	3	0.4291	0	1	1	1	583.001	583.001	1746.99	1746.99	0.37	0.00021	0/0	0	0	7296960	HCD	MS2	33.4597	10.258	50.2655	19216	19216	19204	220621_E_204.raw	F6.4	NA	1374	2.68	1	FALSE	0.0004803	0.004316	0.333
High	Sequest HT	Sequest HT (A5)	A	5	Unambiguous	QPPVSPGTALVGSQKEPSEVPTPKRPR	[K].qPPVSPGTALVGSQkEPSEVPTPkRPR.[G]	1	P17096	P17096	High mobility group protein HMG-I/HMG-Y OS=Homo sapiens OX=9606 GN=HMGA1 PE=1 SV=3	P17096	High mobility group protein HMG-I/HMG-Y OS=Homo sapiens OX=9606 GN=HMGA1 PE=1 SV=3	0	3	3	0.3457	0	1	1	1	1044.58	1044.58	3131.73	3131.72	5.41	0.00565	0/0	0	0	1.22553e+06	HCD	MS2	42.8708	120	91.601	28985	28985	28983	200821_HELA_MGTG_iNrich_bRP_F07.raw	F1.7	NoneMonoisotopic	1596	1.88	1	FALSE	9.269e-06	3.039e-05	0.87
High	Sequest HT	Sequest HT (A5)	A	5	Unambiguous	DEQSAFR	[G].dEQSAFR.[C]	1	P17302	P17302	Gap junction alpha-1 protein OS=Homo sapiens OX=9606 GN=GJA1 PE=1 SV=2	P17302	Gap junction alpha-1 protein OS=Homo sapiens OX=9606 GN=GJA1 PE=1 SV=2	0	2	2	0.1378	0	1	1	1	527.261	527.261	1053.51	1053.52	-0.2	-0.0001	0/0	0	0	3.93855e+06	HCD	MS2	25.6691	17.732	50.9528	11317	11317	11313	200821_HELA_MGTG_iNrich_bRP_F02.raw	F1.2	NA	1600	1.96	1	FALSE	0.0001938	0.001451	0.443
High	Sequest HT	Sequest HT (A5)	A	5	Selected	ETVHCDLQPVGPER	[A].eTVHcDLQPVGPER.[G]	1	P17813	P17813	Endoglin OS=Homo sapiens OX=9606 GN=ENG PE=1 SV=2	P17813	Endoglin OS=Homo sapiens OX=9606 GN=ENG PE=1 SV=2	0	3	3	0.6113	0	1	1	1	613.309	613.309	1837.91	1837.91	4.56	0.00279	0/0	0	0	619291	HCD	MS2	9.19219	120	62.608	16103	16103	16097	200821_HELA_MGTG_iNrich_bRP_F07.raw	F1.7	NA	2477	5.3	1	FALSE	9.269e-06	2.122e-05	0.909
High	Sequest HT	Sequest HT (A5)	A	5	Selected	ETVHCDLQPVGPER	[A].eTVHcDLQPVGPER.[G]	1	P17813	P17813	Endoglin OS=Homo sapiens OX=9606 GN=ENG PE=1 SV=2	P17813	Endoglin OS=Homo sapiens OX=9606 GN=ENG PE=1 SV=2	0	3	3	0.5881	0	1	1	1	613.306	613.306	1837.9	1837.91	-0.52	-0.00032	0/0	0	0	639101	HCD	MS2	37.6812	120	50.0806	16292	16292	16284	220621_E_310.raw	F7.10	NA	2402	4.54	1	FALSE	9.269e-06	4.989e-07	1.319
High	Sequest HT	Sequest HT (A5)	A	5	Unambiguous	NQAINPKLLQLVEDR	[A].nQAINPkLLQLVEDR.[G]	1	P17844	P17844	Probable ATP-dependent RNA helicase DDX5 OS=Homo sapiens OX=9606 GN=DDX5 PE=1 SV=1	P17844	Probable ATP-dependent RNA helicase DDX5 OS=Homo sapiens OX=9606 GN=DDX5 PE=1 SV=1	0	2	0	0.4868	0	1	1	1	999.561	999.561	1998.11	1998.12	-5.35	-0.00534	0/0	0	0	3505329	HCD	MS2	82.4207	94.506	111.247	43648	43648	43641	220621_E_312.raw	F7.12	NoneMonoisotopic	1725	3.41	1	FALSE	9.666e-05	0.0005875	0.537
High	Sequest HT	Sequest HT (A5)	A	5	Selected	NQAINPKLLQLVEDR	[A].nQAINPkLLQLVEDR.[G]	1	P17844	P17844	Probable ATP-dependent RNA helicase DDX5 OS=Homo sapiens OX=9606 GN=DDX5 PE=1 SV=1	P17844	Probable ATP-dependent RNA helicase DDX5 OS=Homo sapiens OX=9606 GN=DDX5 PE=1 SV=1	0	3	0	0.32	0	1	1	1	666.711	666.711	1998.12	1998.12	-3.56	-0.00237	0/0	0	0	2.37934e+06	HCD	MS2	81.6518	28.176	111.308	43673	43673	43667	220621_E_312.raw	F7.12	NA	1623	3.5	1	FALSE	0.007124	0.06823	0.039
High	Sequest HT	Sequest HT (A5)	A	5	Unambiguous	NNFLWPFKLSSPR	[A].nNFLWPFkLSSPR.[G]	1	P18124	P18124	60S ribosomal protein L7 OS=Homo sapiens OX=9606 GN=RPL7 PE=1 SV=1	P18124	60S ribosomal protein L7 OS=Homo sapiens OX=9606 GN=RPL7 PE=1 SV=1	0	2	0	0.4758	0	1	1	1	926.999	926.999	1852.99	1853	-4.2	-0.00389	0/0	0	0	2.93016e+06	HCD	MS2	88.0937	16.228	124.752	55442	55442	55435	220621_E_108.raw	F5.8	NA	2317	2.27	1	FALSE	0.0001901	0.001351	0.45
High	Sequest HT	Sequest HT (A5)	A	5	Selected	NINEALLR	[T].nINEALLR.[A]	1	P19823	P19823	Inter-alpha-trypsin inhibitor heavy chain H2 OS=Homo sapiens OX=9606 GN=ITIH2 PE=1 SV=2	P19823	Inter-alpha-trypsin inhibitor heavy chain H2 OS=Homo sapiens OX=9606 GN=ITIH2 PE=1 SV=2	0	2	2	0.0691	0	1	1	1	572.831	572.831	1144.65	1144.65	3.28	0.00188	0/0	0	0	1.43098e+06	HCD	MS2	18.0398	75.369	62.6978	16142	16142	16136	200821_HELA_MGTG_iNrich_bRP_F07.raw	F1.7	NA	1551	2.46	1	FALSE	0.003186	0.02796	0.136
High	Sequest HT	Sequest HT (A5)	A	5	Selected	ETENSALQLQVTER	[L].eTENSALQLQVTER.[E]	1	P20700	P20700	Lamin-B1 OS=Homo sapiens OX=9606 GN=LMNB1 PE=1 SV=2	P20700	Lamin-B1 OS=Homo sapiens OX=9606 GN=LMNB1 PE=1 SV=2	0	2	2	0.4742	0	1	1	1	909.967	909.967	1818.93	1818.94	-6.7	-0.00609	0/0	0	0	730209	HCD	MS2	28.2126	120	86.6053	26411	26411	26409	200925_HELA_iNrich_bRP_F10.raw	F2.10	NA	2535	3.29	1	FALSE	0.000182	0.001305	0.454
High	Sequest HT	Sequest HT (A5)	A	5	Unambiguous	DAHNKKAVSR	[N].dAHNkkAVSR.[S]	1	P20810	P20810	Calpastatin OS=Homo sapiens OX=9606 GN=CAST PE=1 SV=4	P20810	Calpastatin OS=Homo sapiens OX=9606 GN=CAST PE=1 SV=4	0	3	3	0.4567	0	1	1	1	472.939	472.939	1416.8	1416.8	0.71	0.00033	0/0	0	0	748442	HCD	MS2	0	120	45.662	8689	8689	8683	200821_HELA_MGTG_iNrich_bRP_F07.raw	F1.7	NA	1446	4.27	1	FALSE	9.269e-06	1.662e-06	1.188
High	Sequest HT	Sequest HT (A5)	A	5	Unambiguous	DAHNKKAVSR	[N].dAHNkkAVSR.[S]	1	P20810	P20810	Calpastatin OS=Homo sapiens OX=9606 GN=CAST PE=1 SV=4	P20810	Calpastatin OS=Homo sapiens OX=9606 GN=CAST PE=1 SV=4	0	3	3	0.4024	0	1	1	1	472.939	472.939	1416.8	1416.8	1.47	0.0007	0/0	0	0	709429	HCD	MS2	44.7701	72.369	31.2476	8562	8562	8557	220621_E_206.raw	F6.6	NA	1435	3.33	1	FALSE	3.982e-05	0.0002424	0.634
High	Sequest HT	Sequest HT (A5)	A	5	Selected	DAHNKKAVSR	[N].dAHNkkAVSR.[S]	1	P20810	P20810	Calpastatin OS=Homo sapiens OX=9606 GN=CAST PE=1 SV=4	P20810	Calpastatin OS=Homo sapiens OX=9606 GN=CAST PE=1 SV=4	0	3	3	0.3974	0	1	1	1	472.939	472.939	1416.8	1416.8	0.62	0.00029	0/0	0	0	2.12663e+06	HCD	MS2	55.3681	22.951	31.3951	8632	8632	8622	220621_E_206.raw	F6.6	NA	1574	2.34	1	FALSE	0.0001302	0.000974	0.484
High	Sequest HT	Sequest HT (A5)	A	5	Unambiguous	DAHNKKAVSR	[N].dAHNkkAVSR.[S]	1	P20810	P20810	Calpastatin OS=Homo sapiens OX=9606 GN=CAST PE=1 SV=4	P20810	Calpastatin OS=Homo sapiens OX=9606 GN=CAST PE=1 SV=4	0	3	3	0.4562	0	1	1	1	472.939	472.94	1416.8	1416.8	0.81	0.00038	0/0	0	0	173796	HCD	MS2	43.0173	120	32.4541	8974	8974	8973	220621_E_306.raw	F7.6	NA	1430	2.74	1	FALSE	1.762e-05	5.302e-05	0.808
High	Sequest HT	Sequest HT (A5)	A	5	Unambiguous	NADGTQTVNYVPSR	[D].nADGTQTVNYVPSR.[E]	1	P21333	P21333	Filamin-A OS=Homo sapiens OX=9606 GN=FLNA PE=1 SV=4	P21333	Filamin-A OS=Homo sapiens OX=9606 GN=FLNA PE=1 SV=4	0	2	2	0.5436	0	1	1	1	862.425	862.425	1723.84	1723.84	-0.18	-0.00015	0/0	0	0	1.34225e+06	HCD	MS2	6.6939	120	65.1545	17534	17534	17529	200821_HELA_MGTG_iNrich_bRP_F02.raw	F1.2	NA	2207	4.01	1	FALSE	9.269e-06	4.963e-09	1.821
High	Sequest HT	Sequest HT (A5)	A	5	Unambiguous	NADGTQTVNYVPSR	[D].nADGTQTVNYVPSR.[E]	1	P21333	P21333	Filamin-A OS=Homo sapiens OX=9606 GN=FLNA PE=1 SV=4	P21333	Filamin-A OS=Homo sapiens OX=9606 GN=FLNA PE=1 SV=4	0	3	3	0.5759	0	1	1	1	575.284	575.284	1723.84	1723.84	-3.09	-0.00177	0/0	0	0	1.61087e+06	HCD	MS2	24.089	32.812	65.2148	17562	17562	17555	200821_HELA_MGTG_iNrich_bRP_F02.raw	F1.2	NA	2286	4.15	1	FALSE	1.762e-05	6.442e-05	0.786
High	Sequest HT	Sequest HT (A5)	A	5	Selected	NADGTQTVNYVPSR	[D].nADGTQTVNYVPSR.[E]	1	P21333	P21333	Filamin-A OS=Homo sapiens OX=9606 GN=FLNA PE=1 SV=4	P21333	Filamin-A OS=Homo sapiens OX=9606 GN=FLNA PE=1 SV=4	0	2	2	0.3377	0	1	1	1	862.425	862.425	1723.84	1723.84	-0.45	-0.00039	0/0	0	0	531370	HCD	MS2	0	120	66.018	17916	17916	17906	200821_HELA_MGTG_iNrich_bRP_F02.raw	F1.2	NA	2248	3.02	1	FALSE	9.269e-06	2.636e-05	0.885
High	Sequest HT	Sequest HT (A5)	A	5	Unambiguous	QSAAGAAPGGGVDTR	[G].qSAAGAAPGGGVDTR.[D]	1	P21333	P21333	Filamin-A OS=Homo sapiens OX=9606 GN=FLNA PE=1 SV=4	P21333	Filamin-A OS=Homo sapiens OX=9606 GN=FLNA PE=1 SV=4	0	2	2	0.3695	0	1	1	1	758.88	758.88	1516.75	1516.75	-0.62	-0.00047	0/0	0	0	671355	HCD	MS2	24.9587	120	51.0777	11112	11112	11100	200821_HELA_MGTG_iNrich_bRP_F04.raw	F1.4	NA	2162	2.49	1	FALSE	0.0001592	0.001128	0.469
High	Sequest HT	Sequest HT (A5)	A	5	Unambiguous	NADGTQTVNYVPSR	[D].nADGTQTVNYVPSR.[E]	1	P21333	P21333	Filamin-A OS=Homo sapiens OX=9606 GN=FLNA PE=1 SV=4	P21333	Filamin-A OS=Homo sapiens OX=9606 GN=FLNA PE=1 SV=4	0	2	2	0.5459	0	1	1	1	862.424	862.424	1723.84	1723.84	-1.62	-0.00139	0/0	0	0	818713	HCD	MS2	0	120	65.3725	17377	17377	17368	200821_HELA_MGTG_iNrich_bRP_F08.raw	F1.8	NA	2257	3.81	1	FALSE	9.269e-06	6.621e-08	1.539
High	Sequest HT	Sequest HT (A5)	A	5	Unambiguous	NADGTQTVNYVPSR	[D].nADGTQTVNYVPSR.[E]	1	P21333	P21333	Filamin-A OS=Homo sapiens OX=9606 GN=FLNA PE=1 SV=4	P21333	Filamin-A OS=Homo sapiens OX=9606 GN=FLNA PE=1 SV=4	0	3	3	0.5921	0	1	1	1	575.285	575.285	1723.84	1723.84	-2.12	-0.00122	0/0	0	0	3.52615e+06	HCD	MS2	72.4086	29.266	65.4664	17419	17419	17407	200821_HELA_MGTG_iNrich_bRP_F08.raw	F1.8	NA	2221	4.83	1	FALSE	9.269e-06	8.876e-06	1.005
High	Sequest HT	Sequest HT (A5)	A	5	Unambiguous	NADGTQTVNYVPSR	[D].nADGTQTVNYVPSR.[E]	1	P21333	P21333	Filamin-A OS=Homo sapiens OX=9606 GN=FLNA PE=1 SV=4	P21333	Filamin-A OS=Homo sapiens OX=9606 GN=FLNA PE=1 SV=4	0	2	2	0.5565	0	1	1	1	862.425	862.425	1723.84	1723.84	-0.34	-0.00029	0/0	0	0	869422	HCD	MS2	8.01139	120	65.6528	17286	17286	17278	200821_HELA_MGTG_iNrich_bRP_F09.raw	F1.9	NA	2230	3.63	1	FALSE	9.269e-06	1.378e-06	1.208
High	Sequest HT	Sequest HT (A5)	A	5	Unambiguous	NADGTQTVNYVPSR	[D].nADGTQTVNYVPSR.[E]	1	P21333	P21333	Filamin-A OS=Homo sapiens OX=9606 GN=FLNA PE=1 SV=4	P21333	Filamin-A OS=Homo sapiens OX=9606 GN=FLNA PE=1 SV=4	0	3	3	0.5868	0	1	1	1	575.285	575.285	1723.84	1723.84	-1.34	-0.00077	0/0	0	0	2.13551e+06	HCD	MS2	32.5304	31.084	65.7719	17335	17335	17330	200821_HELA_MGTG_iNrich_bRP_F09.raw	F1.9	NA	2304	4.55	1	FALSE	9.269e-06	2.702e-05	0.883
High	Sequest HT	Sequest HT (A5)	A	5	Selected	NADGTQTVNYVPSR	[D].nADGTQTVNYVPSR.[E]	1	P21333	P21333	Filamin-A OS=Homo sapiens OX=9606 GN=FLNA PE=1 SV=4	P21333	Filamin-A OS=Homo sapiens OX=9606 GN=FLNA PE=1 SV=4	0	2	2	0.3433	0	1	1	1	862.426	862.426	1723.85	1723.84	1.08	0.00093	0/0	0	0	657189	HCD	MS2	0	120	66.6779	17727	17727	17720	200821_HELA_MGTG_iNrich_bRP_F09.raw	F1.9	NA	2384	3.35	1	FALSE	3.982e-05	0.0001309	0.704
High	Sequest HT	Sequest HT (A5)	A	5	Unambiguous	QSAAGAAPGGGVDTR	[G].qSAAGAAPGGGVDTR.[D]	1	P21333	P21333	Filamin-A OS=Homo sapiens OX=9606 GN=FLNA PE=1 SV=4	P21333	Filamin-A OS=Homo sapiens OX=9606 GN=FLNA PE=1 SV=4	0	2	2	0.5522	0	1	1	1	758.881	758.881	1516.76	1516.75	0.54	0.00041	0/0	0	0	3.29506e+06	HCD	MS2	16.8536	81.882	37.541	11969	11969	11963	220621_E_104.raw	F5.4	NA	2163	3.35	1	FALSE	8.493e-05	0.0004637	0.563
High	Sequest HT	Sequest HT (A5)	A	5	Selected	NADGTQTVNYVPSR	[D].nADGTQTVNYVPSR.[E]	1	P21333	P21333	Filamin-A OS=Homo sapiens OX=9606 GN=FLNA PE=1 SV=4	P21333	Filamin-A OS=Homo sapiens OX=9606 GN=FLNA PE=1 SV=4	0	2	2	0.509	0	1	1	1	862.427	862.427	1723.85	1723.84	1.37	0.00118	0/0	0	0	5.03657e+06	HCD	MS2	17.3718	35.835	51.6248	19987	19987	19984	220621_E_204.raw	F6.4	NA	2343	4.44	1	FALSE	9.269e-06	1.209e-06	1.222
High	Sequest HT	Sequest HT (A5)	A	5	Unambiguous	QSAAGAAPGGGVDTR	[G].qSAAGAAPGGGVDTR.[D]	1	P21333	P21333	Filamin-A OS=Homo sapiens OX=9606 GN=FLNA PE=1 SV=4	P21333	Filamin-A OS=Homo sapiens OX=9606 GN=FLNA PE=1 SV=4	0	2	2	0.5505	0	1	1	1	758.881	758.88	1516.75	1516.75	0.07	5e-05	0/0	0	0	4746123	HCD	MS2	13.5139	52.058	37.2925	11771	11771	11768	220621_E_205.raw	F6.5	NA	2157	3.27	1	FALSE	7.925e-05	0.0003476	0.594
High	Sequest HT	Sequest HT (A5)	A	5	Selected	NADGTQTVNYVPSR	[D].nADGTQTVNYVPSR.[E]	1	P21333	P21333	Filamin-A OS=Homo sapiens OX=9606 GN=FLNA PE=1 SV=4	P21333	Filamin-A OS=Homo sapiens OX=9606 GN=FLNA PE=1 SV=4	0	2	2	0.486	0	1	1	1	862.422	862.422	1723.84	1723.84	-4.57	-0.00394	0/0	0	0	2861933	HCD	MS2	0	59.188	53.184	19208	19208	19204	220621_E_210.raw	F6.10	NA	2126	3.93	1	FALSE	9.269e-06	4.861e-06	1.071
High	Sequest HT	Sequest HT (A5)	A	5	Unambiguous	NADGTQTVNYVPSR	[D].nADGTQTVNYVPSR.[E]	1	P21333	P21333	Filamin-A OS=Homo sapiens OX=9606 GN=FLNA PE=1 SV=4	P21333	Filamin-A OS=Homo sapiens OX=9606 GN=FLNA PE=1 SV=4	0	3	3	0.5346	0	1	1	1	575.286	575.286	1723.84	1723.84	0.45	0.00026	0/0	0	0	6.63392e+06	HCD	MS2	5.57219	15.109	53.2761	19259	19259	19256	220621_E_210.raw	F6.10	NA	2287	4.62	1	FALSE	9.269e-06	9.415e-06	0.998
High	Sequest HT	Sequest HT (A5)	A	5	Unambiguous	NADGTQTVNYVPSR	[D].nADGTQTVNYVPSR.[E]	1	P21333	P21333	Filamin-A OS=Homo sapiens OX=9606 GN=FLNA PE=1 SV=4	P21333	Filamin-A OS=Homo sapiens OX=9606 GN=FLNA PE=1 SV=4	0	3	3	0.5332	0	1	1	1	575.286	575.286	1723.84	1723.84	0.23	0.00013	0/0	0	0	17646044	HCD	MS2	26.3124	5.371	53.4975	19382	19382	19373	220621_E_210.raw	F6.10	NA	2285	4.07	1	FALSE	5.843e-05	0.0003101	0.607
High	Sequest HT	Sequest HT (A5)	A	5	Selected	NADGTQTVNYVPSR	[D].nADGTQTVNYVPSR.[E]	1	P21333	P21333	Filamin-A OS=Homo sapiens OX=9606 GN=FLNA PE=1 SV=4	P21333	Filamin-A OS=Homo sapiens OX=9606 GN=FLNA PE=1 SV=4	0	2	2	0.4654	0	1	1	1	862.427	862.427	1723.85	1723.84	1.91	0.00165	0/0	0	0	4.07992e+06	HCD	MS2	20.8978	43.942	54.2315	19793	19793	19789	220621_E_210.raw	F6.10	NA	2307	3.61	1	FALSE	9.269e-06	1.536e-07	1.447
High	Sequest HT	Sequest HT (A5)	A	5	Selected	NADGTQTVNYVPSR	[D].nADGTQTVNYVPSR.[E]	1	P21333	P21333	Filamin-A OS=Homo sapiens OX=9606 GN=FLNA PE=1 SV=4	P21333	Filamin-A OS=Homo sapiens OX=9606 GN=FLNA PE=1 SV=4	0	2	2	0.4479	0	1	1	1	862.426	862.426	1723.84	1723.84	0.18	0.00016	0/0	0	0	3.28727e+06	HCD	MS2	0	57.317	55.0348	20239	20239	20231	220621_E_210.raw	F6.10	NA	2284	3.17	1	FALSE	3.982e-05	0.0001485	0.69
High	Sequest HT	Sequest HT (A5)	A	5	Unambiguous	NADGTQTVNYVPSR	[D].nADGTQTVNYVPSR.[E]	1	P21333	P21333	Filamin-A OS=Homo sapiens OX=9606 GN=FLNA PE=1 SV=4	P21333	Filamin-A OS=Homo sapiens OX=9606 GN=FLNA PE=1 SV=4	0	2	2	0.3819	0	1	1	1	862.425	862.425	1723.84	1723.84	-0.83	-0.00071	0/0	0	0	2.2108e+06	HCD	MS2	23.4363	71.085	51.667	19484	19484	19477	220621_E_211.raw	F6.11	NA	2277	2.88	1	FALSE	0.0003372	0.002536	0.386
High	Sequest HT	Sequest HT (A5)	A	5	Unambiguous	DGTQTVNYVPSR	[A].dGTQTVNYVPSR.[E]	1	P21333	P21333	Filamin-A OS=Homo sapiens OX=9606 GN=FLNA PE=1 SV=4	P21333	Filamin-A OS=Homo sapiens OX=9606 GN=FLNA PE=1 SV=4	0	2	2	0.4029	0	1	1	1	769.394	769.393	1537.78	1537.78	0.19	0.00014	0/0	0	0	9310791	HCD	MS2	35.8763	10.717	49.3396	17919	17919	17917	220621_E_212.raw	F6.12	NA	2380	2.73	1	FALSE	0.0001068	0.0007639	0.51
High	Sequest HT	Sequest HT (A5)	A	5	Unambiguous	QSAAGAAPGGGVDTR	[G].qSAAGAAPGGGVDTR.[D]	1	P21333	P21333	Filamin-A OS=Homo sapiens OX=9606 GN=FLNA PE=1 SV=4	P21333	Filamin-A OS=Homo sapiens OX=9606 GN=FLNA PE=1 SV=4	0	2	2	0.2838	0	1	1	1	758.88	758.88	1516.75	1516.75	-0.46	-0.00035	0/0	0	0	392064	HCD	MS2	60.9721	120	38.1575	11819	11819	11807	220621_E_305.raw	F7.5	NA	2146	2.22	1	FALSE	0.002098	0.01821	0.184
High	Sequest HT	Sequest HT (A5)	A	5	Unambiguous	NADGTQTVNYVPSR	[D].nADGTQTVNYVPSR.[E]	1	P21333	P21333	Filamin-A OS=Homo sapiens OX=9606 GN=FLNA PE=1 SV=4	P21333	Filamin-A OS=Homo sapiens OX=9606 GN=FLNA PE=1 SV=4	0	2	2	0.1719	0	1	1	1	862.425	862.425	1723.84	1723.84	-0.29	-0.00025	0/0	0	0	450136	HCD	MS2	10.2739	120	52.8271	17494	17494	17493	220621_E_310.raw	F7.10	NA	2200	1.92	1	FALSE	0.008286	0.07862	0.023
High	Sequest HT	Sequest HT (A5)	A	5	Unambiguous	NADGTQTVNYVPSR	[D].nADGTQTVNYVPSR.[E]	1	P21333	P21333	Filamin-A OS=Homo sapiens OX=9606 GN=FLNA PE=1 SV=4	P21333	Filamin-A OS=Homo sapiens OX=9606 GN=FLNA PE=1 SV=4	0	3	3	0.5644	0	1	1	1	575.285	575.285	1723.84	1723.84	-1.58	-0.00091	0/0	0	0	1.46105e+06	HCD	MS2	25.014	74.318	52.922	17536	17536	17532	220621_E_310.raw	F7.10	NA	2243	4.5	1	FALSE	9.269e-06	5.352e-06	1.06
High	Sequest HT	Sequest HT (A5)	A	5	Selected	NADGTQTVNYVPSR	[D].nADGTQTVNYVPSR.[E]	1	P21333	P21333	Filamin-A OS=Homo sapiens OX=9606 GN=FLNA PE=1 SV=4	P21333	Filamin-A OS=Homo sapiens OX=9606 GN=FLNA PE=1 SV=4	0	2	2	0.4202	0	1	1	1	862.426	862.426	1723.84	1723.84	0.64	0.00055	0/0	0	0	504888	HCD	MS2	26.2643	120	54.0326	17996	17996	17987	220621_E_310.raw	F7.10	NA	2316	2.57	1	FALSE	9.666e-05	0.0005844	0.538
High	Sequest HT	Sequest HT (A5)	A	5	Unambiguous	NADGTQTVNYVPSR	[D].nADGTQTVNYVPSR.[E]	1	P21333	P21333	Filamin-A OS=Homo sapiens OX=9606 GN=FLNA PE=1 SV=4	P21333	Filamin-A OS=Homo sapiens OX=9606 GN=FLNA PE=1 SV=4	0	2	2	0.5018	0	1	1	1	862.426	862.426	1723.84	1723.84	0.68	0.00058	0/0	0	0	468915	HCD	MS2	0	120	52.9294	16852	16852	16847	220621_E_311.raw	F7.11	NA	2318	2.75	1	FALSE	9.666e-05	0.0006545	0.526
High	Sequest HT	Sequest HT (A5)	A	5	Unambiguous	NADGTQTVNYVPSR	[D].nADGTQTVNYVPSR.[E]	1	P21333	P21333	Filamin-A OS=Homo sapiens OX=9606 GN=FLNA PE=1 SV=4	P21333	Filamin-A OS=Homo sapiens OX=9606 GN=FLNA PE=1 SV=4	0	2	2	0.5115	0	1	1	1	862.427	862.427	1723.85	1723.84	1.6	0.00138	0/0	0	0	1.18989e+06	HCD	MS2	11.9426	120	53.2435	18222	18222	18216	220428_iNrich_HELA_MG132_Trypsin_04.raw	F12.4	NA	2336	3.93	1	FALSE	9.269e-06	3.152e-06	1.118
High	Sequest HT	Sequest HT (A5)	A	5	Unambiguous	QSAAGAAPGGGVDTR	[G].qSAAGAAPGGGVDTR.[D]	1	P21333	P21333	Filamin-A OS=Homo sapiens OX=9606 GN=FLNA PE=1 SV=4	P21333	Filamin-A OS=Homo sapiens OX=9606 GN=FLNA PE=1 SV=4	0	2	2	0.5047	0	1	1	1	758.881	758.881	1516.76	1516.75	0.54	0.00041	0/0	0	0	877823	HCD	MS2	21.3747	120	38.8267	10774	10774	10767	220428_iNrich_HELA_MG132_Trypsin_05.raw	F12.5	NA	2163	3.21	1	FALSE	0.0002542	0.001775	0.422
High	Sequest HT	Sequest HT (A5)	A	5	Unambiguous	NADGTQTVNYVPSR	[D].nADGTQTVNYVPSR.[E]	1	P21333	P21333	Filamin-A OS=Homo sapiens OX=9606 GN=FLNA PE=1 SV=4	P21333	Filamin-A OS=Homo sapiens OX=9606 GN=FLNA PE=1 SV=4	0	2	2	0.4841	0	1	1	1	862.427	862.427	1723.85	1723.84	1.85	0.0016	0/0	0	0	1.09859e+06	HCD	MS2	0	120	52.6092	17324	17324	17319	220428_iNrich_HELA_MG132_Trypsin_10.raw	F12.10	NA	2308	3.45	1	FALSE	9.269e-06	3.721e-06	1.1
High	Sequest HT	Sequest HT (A5)	A	5	Selected	NADGTQTVNYVPSR	[D].nADGTQTVNYVPSR.[E]	1	P21333	P21333	Filamin-A OS=Homo sapiens OX=9606 GN=FLNA PE=1 SV=4	P21333	Filamin-A OS=Homo sapiens OX=9606 GN=FLNA PE=1 SV=4	0	2	2	0.5077	0	1	1	1	862.425	862.425	1723.84	1723.84	-0.3	-0.00026	0/0	0	0	1.8193e+06	HCD	MS2	12.1223	120	53.6699	17828	17828	17826	220428_iNrich_HELA_MG132_Trypsin_10.raw	F12.10	NA	2214	3.9	1	FALSE	9.269e-06	6.59e-10	2.041
High	Sequest HT	Sequest HT (A5)	A	5	Selected	NADGTQTVNYVPSR	[D].nADGTQTVNYVPSR.[E]	1	P21333	P21333	Filamin-A OS=Homo sapiens OX=9606 GN=FLNA PE=1 SV=4	P21333	Filamin-A OS=Homo sapiens OX=9606 GN=FLNA PE=1 SV=4	0	2	2	0.5439	0	1	1	1	862.425	862.425	1723.84	1723.84	-0.3	-0.00026	0/0	0	0	1.8193e+06	HCD	MS2	0	120	53.6725	17829	17829	17826	220428_iNrich_HELA_MG132_Trypsin_10.raw	F12.10	NA	2214	4.56	1	FALSE	9.269e-06	5.853e-09	1.803
High	Sequest HT	Sequest HT (A5)	A	5	Selected	NADGTQTVNYVPSR	[D].nADGTQTVNYVPSR.[E]	1	P21333	P21333	Filamin-A OS=Homo sapiens OX=9606 GN=FLNA PE=1 SV=4	P21333	Filamin-A OS=Homo sapiens OX=9606 GN=FLNA PE=1 SV=4	0	2	2	0.4925	0	1	1	1	862.426	862.426	1723.85	1723.84	0.8	0.00069	0/0	0	0	880734	HCD	MS2	8.6542	120	54.5474	18228	18228	18216	220428_iNrich_HELA_MG132_Trypsin_10.raw	F12.10	NA	2334	3.33	1	FALSE	9.269e-06	1.587e-07	1.444
High	Sequest HT	Sequest HT (A5)	A	5	Selected	DGTQTVNYVPSR	[A].dGTQTVNYVPSR.[E]	1	P21333	P21333	Filamin-A OS=Homo sapiens OX=9606 GN=FLNA PE=1 SV=4	P21333	Filamin-A OS=Homo sapiens OX=9606 GN=FLNA PE=1 SV=4	0	2	2	0.4077	0	1	1	1	769.392	769.392	1537.78	1537.78	-2.32	-0.00179	0/0	0	0	2.41409e+06	HCD	MS2	0	87.711	50.5788	16160	16160	16149	220428_iNrich_HELA_MG132_Trypsin_11.raw	F12.11	NoneMonoisotopic	2327	3.36	1	FALSE	9.269e-06	1.122e-05	0.979
High	Sequest HT	Sequest HT (A5)	A	5	Selected	QVNLEYLAR	[H].qVNLEYLAR.[V]	1	P21399	P21399	Cytoplasmic aconitate hydratase OS=Homo sapiens OX=9606 GN=ACO1 PE=1 SV=3	P21399	Cytoplasmic aconitate hydratase OS=Homo sapiens OX=9606 GN=ACO1 PE=1 SV=3	0	2	2	0.3056	0	1	1	1	654.36	654.36	1307.71	1307.71	-1.55	-0.00102	0/0	0	0	2.81527e+06	HCD	MS2	14.0272	61.909	71.114	30234	30234	30228	220621_E_207.raw	F6.7	NA	1731	3.37	1	FALSE	7.925e-05	0.0003897	0.582
High	Sequest HT	Sequest HT (A5)	A	5	Selected	QVNLEYLAR	[H].qVNLEYLAR.[V]	1	P21399	P21399	Cytoplasmic aconitate hydratase OS=Homo sapiens OX=9606 GN=ACO1 PE=1 SV=3	P21399	Cytoplasmic aconitate hydratase OS=Homo sapiens OX=9606 GN=ACO1 PE=1 SV=3	0	2	2	0.2428	0	1	1	1	654.363	654.363	1307.72	1307.71	3.71	0.00243	0/0	0	0	688368	HCD	MS2	29.0363	120	70.5131	26895	26895	26887	220428_iNrich_HELA_MG132_Trypsin_07.raw	F12.7	NA	1898	3.13	1	FALSE	7.925e-05	0.0004161	0.575
High	Sequest HT	Sequest HT (A5)	A	5	Selected	EKTLETVPLER	[M].ekTLETVPLER.[K]	1	P22626	P22626	Heterogeneous nuclear ribonucleoproteins A2/B1 OS=Homo sapiens OX=9606 GN=HNRNPA2B1 PE=1 SV=2	P22626	Heterogeneous nuclear ribonucleoproteins A2/B1 OS=Homo sapiens OX=9606 GN=HNRNPA2B1 PE=1 SV=2	0	2	2	0.1308	0	1	1	1	780.947	780.947	1560.89	1560.89	-0.03	-3e-05	0/0	0	0	5.57948e+06	HCD	MS2	35.6005	16.766	99.7674	32626	32626	32622	200925_HELA_iNrich_bRP_F01.raw	F2.1	NA	1418	2.37	1	FALSE	0.002537	0.02264	0.16
High	Sequest HT	Sequest HT (A5)	A	5	Selected	DEAIHCPPCSEEKLAR	[G].dEAIHcPPcSEEkLAR.[C]	1	P22692	P22692	Insulin-like growth factor-binding protein 4 OS=Homo sapiens OX=9606 GN=IGFBP4 PE=1 SV=2	P22692	Insulin-like growth factor-binding protein 4 OS=Homo sapiens OX=9606 GN=IGFBP4 PE=1 SV=2	0	3	3	0.4862	0	1	1	1	720.013	720.013	2158.03	2158.03	-1.34	-0.00096	0/0	0	0	2.06335e+06	HCD	MS2	68.3072	120	65.9942	17753	17753	17743	200821_HELA_MGTG_iNrich_bRP_F04.raw	F1.4	NA	2171	4.71	1	FALSE	9.269e-06	1.363e-06	1.209
High	Sequest HT	Sequest HT (A5)	A	5	Selected	DEAIHCPPCSEEKLAR	[G].dEAIHcPPcSEEkLAR.[C]	1	P22692	P22692	Insulin-like growth factor-binding protein 4 OS=Homo sapiens OX=9606 GN=IGFBP4 PE=1 SV=2	P22692	Insulin-like growth factor-binding protein 4 OS=Homo sapiens OX=9606 GN=IGFBP4 PE=1 SV=2	0	3	3	0.474	0	1	1	1	720.013	720.013	2158.02	2158.03	-1.78	-0.00128	0/0	0	0	1444557	HCD	MS2	15.5701	120	54.1606	19728	19728	19724	220621_E_306.raw	F7.6	NA	2153	5.19	1	FALSE	9.269e-06	6.357e-07	1.292
High	Sequest HT	Sequest HT (A5)	A	5	Unambiguous	DVLLEACCADGHR	[A].dVLLEAccADGHR.[M]	1	P23142	P23142	Fibulin-1 OS=Homo sapiens OX=9606 GN=FBLN1 PE=1 SV=4	P23142	Fibulin-1 OS=Homo sapiens OX=9606 GN=FBLN1 PE=1 SV=4	0	3	3	0.5613	0	1	1	1	572.938	572.938	1716.8	1716.8	0.37	0.00021	0/0	0	0	4.49907e+06	HCD	MS2	31.7863	35.265	73.1136	20537	20537	20528	200821_HELA_MGTG_iNrich_bRP_F09.raw	F1.9	NA	1536	4.08	1	FALSE	9.269e-06	2.051e-06	1.165
High	Sequest HT	Sequest HT (A5)	A	5	Unambiguous	DVLLEACCADGHR	[A].dVLLEAccADGHR.[M]	1	P23142	P23142	Fibulin-1 OS=Homo sapiens OX=9606 GN=FBLN1 PE=1 SV=4	P23142	Fibulin-1 OS=Homo sapiens OX=9606 GN=FBLN1 PE=1 SV=4	0	3	3	0.6206	0	1	1	1	572.938	572.938	1716.8	1716.8	0.27	0.00015	0/0	0	0	4.52637e+06	HCD	MS2	46.253	14.45	72.4	20069	20069	20065	200821_HELA_MGTG_iNrich_bRP_F10.raw	F1.10	NA	1543	4.85	1	FALSE	9.269e-06	1.293e-07	1.466
High	Sequest HT	Sequest HT (A5)	A	5	Unambiguous	DVLLEACCADGHR	[A].dVLLEAccADGHR.[M]	1	P23142	P23142	Fibulin-1 OS=Homo sapiens OX=9606 GN=FBLN1 PE=1 SV=4	P23142	Fibulin-1 OS=Homo sapiens OX=9606 GN=FBLN1 PE=1 SV=4	0	3	3	0.7374	0	1	1	1	572.937	572.937	1716.8	1716.8	-0.38	-0.00022	0/0	0	0	10723804	HCD	MS2	16.2165	7.732	59.4288	24394	24394	24391	220621_E_201.raw	F6.1	NA	1494	5.37	1	FALSE	9.269e-06	4.432e-09	1.833
High	Sequest HT	Sequest HT (A5)	A	5	Unambiguous	DVLLEACCADGHR	[A].dVLLEAccADGHR.[M]	1	P23142	P23142	Fibulin-1 OS=Homo sapiens OX=9606 GN=FBLN1 PE=1 SV=4	P23142	Fibulin-1 OS=Homo sapiens OX=9606 GN=FBLN1 PE=1 SV=4	0	3	3	0.6097	0	1	1	1	572.938	572.937	1716.8	1716.8	0.04	2e-05	0/0	0	0	8338511	HCD	MS2	35.9225	14.45	59.7874	24610	24610	24599	220621_E_201.raw	F6.1	NA	1530	3.92	1	FALSE	9.269e-06	4.304e-05	0.831
High	Sequest HT	Sequest HT (A5)	A	5	Unambiguous	DVLLEACCADGHR	[A].dVLLEAccADGHR.[M]	1	P23142	P23142	Fibulin-1 OS=Homo sapiens OX=9606 GN=FBLN1 PE=1 SV=4	P23142	Fibulin-1 OS=Homo sapiens OX=9606 GN=FBLN1 PE=1 SV=4	0	3	0	0.6642	0	1	1	1	572.937	572.937	1716.8	1716.8	-0.56	-0.00032	0/0	0	0	6.32519e+06	HCD	MS2	69.2442	15.919	60.6633	23737	23737	23728	220621_E_301.raw	F7.1	NA	1482	5.3	1	FALSE	9.269e-06	6.69e-08	1.538
High	Sequest HT	Sequest HT (A5)	A	5	Selected	DVLLEACCADGHR	[A].dVLLEAccADGHR.[M]	1	P23142	P23142	Fibulin-1 OS=Homo sapiens OX=9606 GN=FBLN1 PE=1 SV=4	P23142	Fibulin-1 OS=Homo sapiens OX=9606 GN=FBLN1 PE=1 SV=4	0	2	2	0.5263	0	1	1	1	858.903	858.903	1716.8	1716.8	0.09	7e-05	0/0	0	0	3.08245e+06	HCD	MS2	45.4592	61.94	60.8309	23835	23835	23832	220621_E_301.raw	F7.1	NA	1529	3.23	1	FALSE	9.269e-06	1.486e-05	0.949
High	Sequest HT	Sequest HT (A5)	A	5	Selected	DVLLEACCADGHR	[A].dVLLEAccADGHR.[M]	1	P23142	P23142	Fibulin-1 OS=Homo sapiens OX=9606 GN=FBLN1 PE=1 SV=4	P23142	Fibulin-1 OS=Homo sapiens OX=9606 GN=FBLN1 PE=1 SV=4	0	3	3	0.6422	0	1	1	1	572.938	572.938	1716.8	1716.8	0.07	4e-05	0/0	0	0	86454184	HCD	MS2	5.62392	2.159	61.077	23969	23969	23962	220621_E_301.raw	F7.1	NA	1529	5.17	1	FALSE	9.269e-06	2.817e-08	1.632
High	Sequest HT	Sequest HT (A5)	A	5	Unambiguous	DVLLEACCADGHR	[A].dVLLEAccADGHR.[M]	1	P23142	P23142	Fibulin-1 OS=Homo sapiens OX=9606 GN=FBLN1 PE=1 SV=4	P23142	Fibulin-1 OS=Homo sapiens OX=9606 GN=FBLN1 PE=1 SV=4	0	3	3	0.6142	0	1	1	1	572.938	572.938	1716.8	1716.8	-0.25	-0.00014	0/0	0	0	53309932	HCD	MS2	52.3171	6.766	61.1166	23990	23990	23988	220621_E_301.raw	F7.1	NA	1514	4.38	1	FALSE	9.269e-06	4.93e-05	0.816
High	Sequest HT	Sequest HT (A5)	A	5	Unambiguous	DVLLEACCADGHR	[A].dVLLEAccADGHR.[M]	1	P23142	P23142	Fibulin-1 OS=Homo sapiens OX=9606 GN=FBLN1 PE=1 SV=4	P23142	Fibulin-1 OS=Homo sapiens OX=9606 GN=FBLN1 PE=1 SV=4	0	3	3	0.6605	0	1	1	1	572.937	572.937	1716.8	1716.8	-0.78	-0.00045	0/0	0	0	30319286	HCD	MS2	45.9094	2.347	61.1834	24028	24028	24027	220621_E_301.raw	F7.1	NA	1489	3.8	1	FALSE	9.269e-06	2.366e-06	1.149
High	Sequest HT	Sequest HT (A5)	A	5	Unambiguous	DVLLEACCADGHR	[A].dVLLEAccADGHR.[M]	1	P23142	P23142	Fibulin-1 OS=Homo sapiens OX=9606 GN=FBLN1 PE=1 SV=4	P23142	Fibulin-1 OS=Homo sapiens OX=9606 GN=FBLN1 PE=1 SV=4	0	3	3	0.6752	0	1	1	1	572.938	572.938	1716.8	1716.8	0.5	0.00029	0/0	0	0	525693	HCD	MS2	28.6498	119.809	59.8975	20391	20391	20384	220621_E_312.raw	F7.12	NA	1568	5.05	1	FALSE	9.269e-06	6.625e-07	1.288
High	Sequest HT	Sequest HT (A5)	A	5	Selected	DVLLEACCADGHR	[A].dVLLEAccADGHR.[M]	1	P23142	P23142	Fibulin-1 OS=Homo sapiens OX=9606 GN=FBLN1 PE=1 SV=4	P23142	Fibulin-1 OS=Homo sapiens OX=9606 GN=FBLN1 PE=1 SV=4	0	2	2	0.4155	0	1	1	1	858.902	858.902	1716.8	1716.8	-1.28	-0.0011	0/0	0	0	503897	HCD	MS2	49.7411	120	58.4307	20345	20345	20335	220428_iNrich_HELA_MG132_Trypsin_12.raw	F12.12	NA	1528	2.07	1	FALSE	0.004659	0.04252	0.089
High	Sequest HT	Sequest HT (A5)	A	5	Unambiguous	DVLLEACCADGHR	[A].dVLLEAccADGHR.[M]	1	P23142	P23142	Fibulin-1 OS=Homo sapiens OX=9606 GN=FBLN1 PE=1 SV=4	P23142	Fibulin-1 OS=Homo sapiens OX=9606 GN=FBLN1 PE=1 SV=4	0	3	0	0.4293	0	1	1	1	572.937	572.937	1716.8	1716.8	-0.51	-0.00029	0/0	0	0	5189932	HCD	MS2	87.6802	5.588	58.4669	20359	20359	20348	220428_iNrich_HELA_MG132_Trypsin_12.raw	F12.12	NA	1481	1.98	1	FALSE	0.0001901	0.001412	0.446
High	Sequest HT	Sequest HT (A5)	A	5	Unambiguous	QGGAGPVGGQGPR	[G].qGGAGPVGGQGPR.[G]	1	P23246	P23246	Splicing factor, proline- and glutamine-rich OS=Homo sapiens OX=9606 GN=SFPQ PE=1 SV=2	P23246	Splicing factor, proline- and glutamine-rich OS=Homo sapiens OX=9606 GN=SFPQ PE=1 SV=2	0	2	0	0.3882	0	1	1	1	670.349	670.348	1339.69	1339.69	-0.31	-0.00021	0/0	0	0	41097300	HCD	MS2	86.8842	1.908	43.6018	14031	14031	14030	220621_E_208.raw	F6.8	NA	2063	1.7	1	FALSE	0.0007096	0.006279	0.296
High	Sequest HT	Sequest HT (A5)	A	5	Unambiguous	QGGAGPVGGQGPR	[G].qGGAGPVGGQGPR.[G]	1	P23246	P23246	Splicing factor, proline- and glutamine-rich OS=Homo sapiens OX=9606 GN=SFPQ PE=1 SV=2	P23246	Splicing factor, proline- and glutamine-rich OS=Homo sapiens OX=9606 GN=SFPQ PE=1 SV=2	0	2	0	0.5261	0	1	1	1	670.352	670.352	1339.7	1339.69	4.67	0.00313	0/0	0	0	5.73226e+06	HCD	MS2	86.5787	44.201	43.9135	13387	13387	13380	220428_iNrich_HELA_MG132_Trypsin_04.raw	F12.4	NA	2030	2.68	1	FALSE	0.0001349	0.001003	0.481
High	Sequest HT	Sequest HT (A5)	A	5	Unambiguous	DPAKSAPAPKKGSKKAVTKAQKKDGKKR	[P].dPAkSAPAPkkGSkkAVTkAQkkDGkkR.[K]	2	Q93079	Q93079	Histone H2B type 1-H OS=Homo sapiens OX=9606 GN=H2BC9 PE=1 SV=3	Q93079; P23527	Histone H2B type 1-H OS=Homo sapiens OX=9606 GN=H2BC9 PE=1 SV=3; Histone H2B type 1-O OS=Homo sapiens OX=9606 GN=H2BC17 PE=1 SV=3	0	4	4	0.6584	0	1	1	1	900.798	900.798	3600.17	3600.17	-1.08	-0.00097	0/0	0	0	404868	HCD	MS2	13.9884	120	95.277	30456	30456	30445	200821_HELA_MGTG_iNrich_bRP_F02.raw	F1.2	NA	71	4.04	1	FALSE	3.982e-05	0.0001077	0.727
High	Sequest HT	Sequest HT (A5)	A	5	Unambiguous	DPAKSAPAPKKGSKKAVTKAQKKDGKKR	[P].dPAkSAPAPkkGSkkAVTkAQkkDGkkR.[K]	2	Q93079	Q93079	Histone H2B type 1-H OS=Homo sapiens OX=9606 GN=H2BC9 PE=1 SV=3	Q93079; P23527	Histone H2B type 1-H OS=Homo sapiens OX=9606 GN=H2BC9 PE=1 SV=3; Histone H2B type 1-O OS=Homo sapiens OX=9606 GN=H2BC17 PE=1 SV=3	0	4	4	0.6054	0	1	1	1	900.796	900.796	3600.16	3600.17	-3.15	-0.00283	0/0	0	0	460893	HCD	MS2	0	120	97.1445	31236	31236	31225	200821_HELA_MGTG_iNrich_bRP_F02.raw	F1.2	NA	86	4.46	1	FALSE	9.269e-06	1.18e-05	0.974
High	Sequest HT	Sequest HT (A5)	A	5	Selected	DPAKSAPAPKKGSKKAVTKAQKKDGKKR	[P].dPAkSAPAPkkGSkkAVTkAQkkDGkkR.[K]	2	Q93079	Q93079	Histone H2B type 1-H OS=Homo sapiens OX=9606 GN=H2BC9 PE=1 SV=3	Q93079; P23527	Histone H2B type 1-H OS=Homo sapiens OX=9606 GN=H2BC9 PE=1 SV=3; Histone H2B type 1-O OS=Homo sapiens OX=9606 GN=H2BC17 PE=1 SV=3	0	3	3	0.6596	0	1	1	1	1200.73	1200.73	3600.17	3600.17	0.5	0.0006	0/0	0	0	364603	HCD	MS2	37.3814	120	97.3462	31848	31848	31838	200821_HELA_MGTG_iNrich_bRP_F03.raw	F1.3	NA	64	4.23	1	FALSE	9.269e-06	1.309e-05	0.962
High	Sequest HT	Sequest HT (A5)	A	5	Unambiguous	DPAKSAPAPKKGSKKAVTKAQKKDGKKR	[P].dPAkSAPAPkkGSkkAVTkAQkkDGkkR.[K]	2	Q93079	Q93079	Histone H2B type 1-H OS=Homo sapiens OX=9606 GN=H2BC9 PE=1 SV=3	Q93079; P23527	Histone H2B type 1-H OS=Homo sapiens OX=9606 GN=H2BC9 PE=1 SV=3; Histone H2B type 1-O OS=Homo sapiens OX=9606 GN=H2BC17 PE=1 SV=3	0	4	4	0.6013	0	1	1	1	900.795	900.795	3600.16	3600.17	-3.56	-0.00321	0/0	0	0	2.36684e+06	HCD	MS2	7.21385	82.38	101.766	33235	33235	33225	200821_HELA_MGTG_iNrich_bRP_F04.raw	F1.4	NA	87	4.69	1	FALSE	1.762e-05	5.305e-05	0.808
High	Sequest HT	Sequest HT (A5)	A	5	Unambiguous	DPAKSAPAPKKGSKKAVTKAQKKDGKKR	[P].dPAkSAPAPkkGSkkAVTkAQkkDGkkR.[K]	2	Q93079	Q93079	Histone H2B type 1-H OS=Homo sapiens OX=9606 GN=H2BC9 PE=1 SV=3	Q93079; P23527	Histone H2B type 1-H OS=Homo sapiens OX=9606 GN=H2BC9 PE=1 SV=3; Histone H2B type 1-O OS=Homo sapiens OX=9606 GN=H2BC17 PE=1 SV=3	0	3	3	0.6696	0	1	1	1	1200.73	1200.73	3600.17	3600.17	-0.53	-0.00063	0/0	0	0	3.53903e+06	HCD	MS2	37.7564	39.734	101.858	33274	33274	33264	200821_HELA_MGTG_iNrich_bRP_F04.raw	F1.4	NA	68	3.39	1	FALSE	3.982e-05	7.202e-05	0.773
High	Sequest HT	Sequest HT (A5)	A	5	Selected	DPAKSAPAPKKGSKKAVTKAQKKDGKKR	[P].dPAkSAPAPkkGSkkAVTkAQkkDGkkR.[K]	2	Q93079	Q93079	Histone H2B type 1-H OS=Homo sapiens OX=9606 GN=H2BC9 PE=1 SV=3	Q93079; P23527	Histone H2B type 1-H OS=Homo sapiens OX=9606 GN=H2BC9 PE=1 SV=3; Histone H2B type 1-O OS=Homo sapiens OX=9606 GN=H2BC17 PE=1 SV=3	0	4	4	0.4092	0	1	1	1	900.798	900.798	3600.17	3600.17	-0.7	-0.00063	0/0	0	0	3.31355e+06	HCD	MS2	42.7103	50.241	85.8305	38043	38043	38041	220621_E_103.raw	F5.3	NA	70	4.35	1	FALSE	0.0001144	0.0008372	0.5
High	Sequest HT	Sequest HT (A5)	A	5	Unambiguous	DPAKSAPAPKKGSKKAVTKAQKKDGKKR	[P].dPAkSAPAPkkGSkkAVTkAQkkDGkkR.[K]	2	Q93079	Q93079	Histone H2B type 1-H OS=Homo sapiens OX=9606 GN=H2BC9 PE=1 SV=3	Q93079; P23527	Histone H2B type 1-H OS=Homo sapiens OX=9606 GN=H2BC9 PE=1 SV=3; Histone H2B type 1-O OS=Homo sapiens OX=9606 GN=H2BC17 PE=1 SV=3	0	3	3	0.7048	0	1	1	1	1200.73	1200.73	3600.17	3600.17	-0.27	-0.00032	0/0	0	0	1.34252e+06	HCD	MS2	0	95.568	85.8393	38049	38049	38041	220621_E_103.raw	F5.3	NA	65	4.54	1	FALSE	9.269e-06	5.443e-06	1.058
High	Sequest HT	Sequest HT (A5)	A	5	Selected	DPAKSAPAPKKGSKKAVTKAQKKDGKKR	[P].dPAkSAPAPkkGSkkAVTkAQkkDGkkR.[K]	2	Q93079	Q93079	Histone H2B type 1-H OS=Homo sapiens OX=9606 GN=H2BC9 PE=1 SV=3	Q93079; P23527	Histone H2B type 1-H OS=Homo sapiens OX=9606 GN=H2BC9 PE=1 SV=3; Histone H2B type 1-O OS=Homo sapiens OX=9606 GN=H2BC17 PE=1 SV=3	0	4	4	0.611	0	1	1	1	900.798	900.798	3600.17	3600.17	-0.7	-0.00063	0/0	0	0	3.31355e+06	HCD	MS2	44.6766	44.063	85.8462	38053	38053	38041	220621_E_103.raw	F5.3	NA	70	4.91	1	FALSE	9.269e-06	4.195e-05	0.834
High	Sequest HT	Sequest HT (A5)	A	5	Selected	DPAKSAPAPKKGSKKAVTKAQKKDGKKR	[P].dPAkSAPAPkkGSkkAVTkAQkkDGkkR.[K]	2	Q93079	Q93079	Histone H2B type 1-H OS=Homo sapiens OX=9606 GN=H2BC9 PE=1 SV=3	Q93079; P23527	Histone H2B type 1-H OS=Homo sapiens OX=9606 GN=H2BC9 PE=1 SV=3; Histone H2B type 1-O OS=Homo sapiens OX=9606 GN=H2BC17 PE=1 SV=3	0	4	4	0.6476	0	1	1	1	900.795	900.795	3600.16	3600.17	-3.98	-0.00359	0/0	0	0	4.22901e+06	HCD	MS2	21.1782	40.561	84.1762	38066	38066	38054	220621_E_104.raw	F5.4	NA	92	5.59	1	FALSE	9.269e-06	1.006e-05	0.991
High	Sequest HT	Sequest HT (A5)	A	5	Selected	DPAKSAPAPKKGSKKAVTKAQKKDGKKR	[P].dPAkSAPAPkkGSkkAVTkAQkkDGkkR.[K]	2	Q93079	Q93079	Histone H2B type 1-H OS=Homo sapiens OX=9606 GN=H2BC9 PE=1 SV=3	Q93079; P23527	Histone H2B type 1-H OS=Homo sapiens OX=9606 GN=H2BC9 PE=1 SV=3; Histone H2B type 1-O OS=Homo sapiens OX=9606 GN=H2BC17 PE=1 SV=3	0	3	3	0.7732	0	1	1	1	1200.73	1200.73	3600.17	3600.17	-2.03	-0.00244	0/0	0	0	1551744	HCD	MS2	0	72.059	84.2131	38085	38085	38080	220621_E_104.raw	F5.4	NA	74	6.04	1	FALSE	9.269e-06	9.989e-09	1.745
High	Sequest HT	Sequest HT (A5)	A	5	Selected	DPAKSAPAPKKGSKKAVTKAQKKDGKKR	[P].dPAkSAPAPkkGSkkAVTkAQkkDGkkR.[K]	2	Q93079	Q93079	Histone H2B type 1-H OS=Homo sapiens OX=9606 GN=H2BC9 PE=1 SV=3	Q93079; P23527	Histone H2B type 1-H OS=Homo sapiens OX=9606 GN=H2BC9 PE=1 SV=3; Histone H2B type 1-O OS=Homo sapiens OX=9606 GN=H2BC17 PE=1 SV=3	0	4	4	0.5276	0	1	1	1	900.796	900.796	3600.16	3600.17	-2.96	-0.00267	0/0	0	0	8831807	HCD	MS2	14.1504	44.666	84.3121	38143	38143	38132	220621_E_104.raw	F5.4	NA	82	4.89	1	FALSE	9.269e-06	5.069e-05	0.813
High	Sequest HT	Sequest HT (A5)	A	5	Selected	DPAKSAPAPKKGSKKAVTKAQKKDGKKR	[P].dPAkSAPAPkkGSkkAVTkAQkkDGkkR.[K]	2	Q93079	Q93079	Histone H2B type 1-H OS=Homo sapiens OX=9606 GN=H2BC9 PE=1 SV=3	Q93079; P23527	Histone H2B type 1-H OS=Homo sapiens OX=9606 GN=H2BC9 PE=1 SV=3; Histone H2B type 1-O OS=Homo sapiens OX=9606 GN=H2BC17 PE=1 SV=3	0	4	4	0.5277	0	1	1	1	900.796	900.796	3600.16	3600.17	-2.35	-0.00211	0/0	0	0	2.28353e+06	HCD	MS2	17.5363	53.367	90.2023	40934	40934	40927	220621_E_105.raw	F5.5	NA	74	3.79	1	FALSE	3.982e-05	0.0001819	0.667
High	Sequest HT	Sequest HT (A5)	A	5	Selected	DPAKSAPAPKKGSKKAVTKAQKKDGKKR	[P].dPAkSAPAPkkGSkkAVTkAQkkDGkkR.[K]	2	Q93079	Q93079	Histone H2B type 1-H OS=Homo sapiens OX=9606 GN=H2BC9 PE=1 SV=3	Q93079; P23527	Histone H2B type 1-H OS=Homo sapiens OX=9606 GN=H2BC9 PE=1 SV=3; Histone H2B type 1-O OS=Homo sapiens OX=9606 GN=H2BC17 PE=1 SV=3	0	4	4	0.7098	0	1	1	1	900.799	900.799	3600.17	3600.17	0	0	0/0	0	0	1.99806e+06	HCD	MS2	10.4414	54.562	84.039	38996	38996	38990	220621_E_204.raw	F6.4	NA	64	5.41	1	FALSE	9.269e-06	2.759e-05	0.88
High	Sequest HT	Sequest HT (A5)	A	5	Selected	DPAKSAPAPKKGSKKAVTKAQKKDGKKR	[P].dPAkSAPAPkkGSkkAVTkAQkkDGkkR.[K]	2	Q93079	Q93079	Histone H2B type 1-H OS=Homo sapiens OX=9606 GN=H2BC9 PE=1 SV=3	Q93079; P23527	Histone H2B type 1-H OS=Homo sapiens OX=9606 GN=H2BC9 PE=1 SV=3; Histone H2B type 1-O OS=Homo sapiens OX=9606 GN=H2BC17 PE=1 SV=3	0	3	3	0.674	0	1	1	1	1200.73	1200.73	3600.17	3600.17	-1.31	-0.00157	0/0	0	0	1.80438e+06	HCD	MS2	0	78.729	84.1098	39035	39035	39029	220621_E_204.raw	F6.4	NA	70	5.43	1	FALSE	9.269e-06	4.123e-06	1.089
High	Sequest HT	Sequest HT (A5)	A	5	Unambiguous	DPAKSAPAPKKGSKKAVTKAQKKDGKKR	[P].dPAkSAPAPkkGSkkAVTkAQkkDGkkR.[K]	2	Q93079	Q93079	Histone H2B type 1-H OS=Homo sapiens OX=9606 GN=H2BC9 PE=1 SV=3	Q93079; P23527	Histone H2B type 1-H OS=Homo sapiens OX=9606 GN=H2BC9 PE=1 SV=3; Histone H2B type 1-O OS=Homo sapiens OX=9606 GN=H2BC17 PE=1 SV=3	0	4	4	0.5738	0	1	1	1	900.797	900.797	3600.17	3600.17	-1.42	-0.00128	0/0	0	0	9738958	HCD	MS2	14.2361	21.3	88.5271	41775	41775	41772	220621_E_206.raw	F6.6	NA	69	5.49	1	FALSE	7.925e-05	0.0004493	0.566
High	Sequest HT	Sequest HT (A5)	A	5	Unambiguous	DPAKSAPAPKKGSKKAVTKAQKKDGKKR	[P].dPAkSAPAPkkGSkkAVTkAQkkDGkkR.[K]	2	Q93079	Q93079	Histone H2B type 1-H OS=Homo sapiens OX=9606 GN=H2BC9 PE=1 SV=3	Q93079; P23527	Histone H2B type 1-H OS=Homo sapiens OX=9606 GN=H2BC9 PE=1 SV=3; Histone H2B type 1-O OS=Homo sapiens OX=9606 GN=H2BC17 PE=1 SV=3	0	3	3	0.6912	0	1	1	1	1200.73	1200.73	3600.17	3600.17	-0.86	-0.00103	0/0	0	0	6.79828e+06	HCD	MS2	0	43.265	88.5886	41809	41809	41798	220621_E_206.raw	F6.6	NA	72	4.76	1	FALSE	3.982e-05	0.0001169	0.717
High	Sequest HT	Sequest HT (A5)	A	5	Unambiguous	DPAKSAPAPKKGSKKAVTKAQKKDGKKR	[P].dPAkSAPAPkkGSkkAVTkAQkkDGkkR.[K]	2	Q93079	Q93079	Histone H2B type 1-H OS=Homo sapiens OX=9606 GN=H2BC9 PE=1 SV=3	Q93079; P23527	Histone H2B type 1-H OS=Homo sapiens OX=9606 GN=H2BC9 PE=1 SV=3; Histone H2B type 1-O OS=Homo sapiens OX=9606 GN=H2BC17 PE=1 SV=3	0	4	4	0.5324	0	1	1	1	900.797	900.797	3600.17	3600.17	-1.49	-0.00134	0/0	0	0	24973980	HCD	MS2	15.7849	12.476	88.8111	41939	41939	41928	220621_E_206.raw	F6.6	NA	69	4.47	1	FALSE	0.0002217	0.001623	0.432
High	Sequest HT	Sequest HT (A5)	A	5	Selected	DPAKSAPAPKKGSKKAVTKAQKKDGKKR	[P].dPAkSAPAPkkGSkkAVTkAQkkDGkkR.[K]	2	Q93079	Q93079	Histone H2B type 1-H OS=Homo sapiens OX=9606 GN=H2BC9 PE=1 SV=3	Q93079; P23527	Histone H2B type 1-H OS=Homo sapiens OX=9606 GN=H2BC9 PE=1 SV=3; Histone H2B type 1-O OS=Homo sapiens OX=9606 GN=H2BC17 PE=1 SV=3	0	4	4	0.5888	0	1	1	1	900.798	900.798	3600.17	3600.17	-0.57	-0.00052	0/0	0	0	5.55442e+06	HCD	MS2	10.7072	49.908	85.7927	38543	38543	38535	220621_E_207.raw	F6.7	NA	68	5.18	1	FALSE	9.269e-06	4.833e-05	0.818
High	Sequest HT	Sequest HT (A5)	A	5	Selected	DLEGDVSTTWHSNDDDVYR	[D].dLEGDVSTTWHSNDDDVYR.[A]	1	P23588	P23588	Eukaryotic translation initiation factor 4B OS=Homo sapiens OX=9606 GN=EIF4B PE=1 SV=2	P23588	Eukaryotic translation initiation factor 4B OS=Homo sapiens OX=9606 GN=EIF4B PE=1 SV=2	0	3	3	0.5516	0	1	1	1	809.028	809.028	2425.07	2425.07	-1.55	-0.00125	0/0	0	0	1.80826e+06	HCD	MS2	0	112.511	82.3259	25324	25324	25313	200821_HELA_MGTG_iNrich_bRP_F03.raw	F1.3	NA	862	5.04	1	FALSE	9.269e-06	1.174e-06	1.226
High	Sequest HT	Sequest HT (A5)	A	5	Unambiguous	DLEGDVSTTWHSNDDDVYRAPPIDR	[D].dLEGDVSTTWHSNDDDVYRAPPIDR.[S]	1	P23588	P23588	Eukaryotic translation initiation factor 4B OS=Homo sapiens OX=9606 GN=EIF4B PE=1 SV=2	P23588	Eukaryotic translation initiation factor 4B OS=Homo sapiens OX=9606 GN=EIF4B PE=1 SV=2	1	4	4	0.4814	0	1	1	1	769.365	769.365	3074.44	3074.43	3.41	0.00262	0/0	0	0	3228890	HCD	MS2	36.5151	66.657	86.3939	26849	26849	26846	200821_HELA_MGTG_iNrich_bRP_F08.raw	F1.8	NA	2052	5.38	1	FALSE	9.269e-06	1.236e-07	1.471
High	Sequest HT	Sequest HT (A5)	A	5	Unambiguous	DLEGDVSTTWHSNDDDVYRAPPIDR	[D].dLEGDVSTTWHSNDDDVYRAPPIDR.[S]	1	P23588	P23588	Eukaryotic translation initiation factor 4B OS=Homo sapiens OX=9606 GN=EIF4B PE=1 SV=2	P23588	Eukaryotic translation initiation factor 4B OS=Homo sapiens OX=9606 GN=EIF4B PE=1 SV=2	1	4	4	0.5388	0	1	1	1	769.361	769.361	3074.42	3074.43	-1.6	-0.00123	0/0	0	0	2.37767e+06	HCD	MS2	55.7916	83.452	86.9424	27105	27105	27094	200821_HELA_MGTG_iNrich_bRP_F08.raw	F1.8	NA	1797	4.64	1	FALSE	9.269e-06	3.583e-08	1.606
High	Sequest HT	Sequest HT (A5)	A	5	Selected	ENGAEASADLR	[D].eNGAEASADLR.[A]	1	P26038	P26038	Moesin OS=Homo sapiens OX=9606 GN=MSN PE=1 SV=3	P26038	Moesin OS=Homo sapiens OX=9606 GN=MSN PE=1 SV=3	0	2	2	0.5265	0	1	1	1	667.329	667.329	1333.65	1333.65	-1.47	-0.00098	0/0	0	0	991121	HCD	MS2	5.36665	120	52.841	11742	11742	11731	200821_HELA_MGTG_iNrich_bRP_F10.raw	F1.10	NA	2098	2.83	1	FALSE	3.982e-05	0.00012	0.714
High	Sequest HT	Sequest HT (A5)	A	5	Selected	QKHLKALTSELANARDESKKTANDMIHAENMR	[V].qkHLkALTSELANARDESkkTANDmIHAENMR.[L]	1	P26038	P26038	Moesin OS=Homo sapiens OX=9606 GN=MSN PE=1 SV=3	P26038	Moesin OS=Homo sapiens OX=9606 GN=MSN PE=1 SV=3	1	4	4	0.5114	0	1	1	1	1013.02	1013.02	4049.06	4049.08	-5.05	-0.00511	0/0	0	0	1.04118e+06	HCD	MS2	50.1255	120	106.332	34393	34393	34381	200821_HELA_MGTG_iNrich_bRP_F10.raw	F1.10	NA	3656	3.52	1	FALSE	0.001689	0.01505	0.205
High	Sequest HT	Sequest HT (A5)	A	5	Selected	QKHLKALTSELANARDESKKTANDMIHAENMR	[V].qkHLkALTSELANARDESkkTANDMIHAENMR.[L]	1	P26038	P26038	Moesin OS=Homo sapiens OX=9606 GN=MSN PE=1 SV=3	P26038	Moesin OS=Homo sapiens OX=9606 GN=MSN PE=1 SV=3	1	4	4	0.3394	0	1	1	1	1009.02	1009.02	4033.07	4033.08	-1.54	-0.00156	0/0	0	0	1.13477e+06	HCD	MS2	77.5541	120	117.935	38994	38994	38983	200821_HELA_MGTG_iNrich_bRP_F10.raw	F1.10	NA	3778	2.77	1	FALSE	0.0002668	0.001894	0.416
High	Sequest HT	Sequest HT (A5)	A	5	Unambiguous	QKHLKALTSELANAR	[V].qkHLkALTSELANAR.[D]	1	P26038	P26038	Moesin OS=Homo sapiens OX=9606 GN=MSN PE=1 SV=3	P26038	Moesin OS=Homo sapiens OX=9606 GN=MSN PE=1 SV=3	0	2	2	0.5896	0	1	1	1	986.574	986.574	1972.14	1972.13	6.53	0.00644	0/0	0	0	3.53394e+06	HCD	MS2	55.3173	95.527	109.806	33273	33273	33262	200925_HELA_iNrich_bRP_F07.raw	F2.7	NoneMonoisotopic	903	4.24	1	FALSE	9.269e-06	4.246e-06	1.085
High	Sequest HT	Sequest HT (A5)	A	5	Unambiguous	DSKKFKGDSR	[N].dSkkFkGDSR.[S]	1	P26599	P26599	Polypyrimidine tract-binding protein 1 OS=Homo sapiens OX=9606 GN=PTBP1 PE=1 SV=2	P26599	Polypyrimidine tract-binding protein 1 OS=Homo sapiens OX=9606 GN=PTBP1 PE=1 SV=2	0	2	2	0.2694	0	1	1	1	752.417	752.417	1503.83	1503.83	-2.69	-0.00202	0/0	0	0	1.02231e+06	HCD	MS2	46.6774	120	62.7856	16180	16180	16175	200821_HELA_MGTG_iNrich_bRP_F07.raw	F1.7	NA	1907	1.93	1	FALSE	3.982e-05	0.0001365	0.7
High	Sequest HT	Sequest HT (A5)	A	5	Unambiguous	DSKKFKGDSR	[N].dSkkFkGDSR.[S]	1	P26599	P26599	Polypyrimidine tract-binding protein 1 OS=Homo sapiens OX=9606 GN=PTBP1 PE=1 SV=2	P26599	Polypyrimidine tract-binding protein 1 OS=Homo sapiens OX=9606 GN=PTBP1 PE=1 SV=2	0	2	2	0.3497	0	1	1	1	752.419	752.419	1503.83	1503.83	0.8	0.0006	0/0	0	0	834168	HCD	MS2	13.1019	120	50.3284	16790	16790	16786	220428_iNrich_HELA_MG132_Trypsin_08.raw	F12.8	NA	1846	3.06	1	FALSE	3.982e-05	0.0001885	0.663
High	Sequest HT	Sequest HT (A5)	A	5	Unambiguous	EKGSREEKQKPQAER	[K].ekGSREEkQkPQAER.[K]	1	P26641	P26641	Elongation factor 1-gamma OS=Homo sapiens OX=9606 GN=EEF1G PE=1 SV=3	P26641	Elongation factor 1-gamma OS=Homo sapiens OX=9606 GN=EEF1G PE=1 SV=3	1	3	3	0.3617	0	1	1	1	712.719	712.719	2136.14	2136.15	-5.25	-0.00374	0/0	0	0	1.09901e+06	HCD	MS2	28.5909	120	52.2724	11787	11787	11781	200821_HELA_MGTG_iNrich_bRP_F11.raw	F1.11	NA	2455	3.29	1	FALSE	0.0001019	0.0007109	0.517
High	Sequest HT	Sequest HT (A5)	A	5	Selected	EKGSREEKQKPQAER	[K].ekGSREEkQkPQAER.[K]	1	P26641	P26641	Elongation factor 1-gamma OS=Homo sapiens OX=9606 GN=EEF1G PE=1 SV=3	P26641	Elongation factor 1-gamma OS=Homo sapiens OX=9606 GN=EEF1G PE=1 SV=3	1	3	3	0.498	0	1	1	1	712.72	712.72	2136.15	2136.15	-3.57	-0.00255	0/0	0	0	2457643	HCD	MS2	11.9917	90.282	60.1537	15224	15224	15217	200821_HELA_MGTG_iNrich_bRP_F11.raw	F1.11	NA	2384	4.98	1	FALSE	9.269e-06	1.769e-06	1.181
High	Sequest HT	Sequest HT (A5)	A	5	Selected	EKGSREEKQKPQAER	[K].ekGSREEkQkPQAER.[K]	1	P26641	P26641	Elongation factor 1-gamma OS=Homo sapiens OX=9606 GN=EEF1G PE=1 SV=3	P26641	Elongation factor 1-gamma OS=Homo sapiens OX=9606 GN=EEF1G PE=1 SV=3	1	3	3	0.5152	0	1	1	1	712.719	712.719	2136.14	2136.15	-5.7	-0.00406	0/0	0	0	2.91578e+06	HCD	MS2	3.871	95.448	57.9892	15112	15112	15108	200821_HELA_MGTG_iNrich_bRP_F12.raw	F1.12	NA	2443	5.26	1	FALSE	9.269e-06	2.078e-05	0.912
High	Sequest HT	Sequest HT (A5)	A	5	Unambiguous	EKGSREEKQKPQAER	[K].ekGSREEkQkPQAER.[K]	1	P26641	P26641	Elongation factor 1-gamma OS=Homo sapiens OX=9606 GN=EEF1G PE=1 SV=3	P26641	Elongation factor 1-gamma OS=Homo sapiens OX=9606 GN=EEF1G PE=1 SV=3	1	2	2	0.4956	0	1	1	1	1068.57	1068.57	2136.14	2136.15	-6.78	-0.00724	0/0	0	0	1690974	HCD	MS2	0	120	58.0379	15135	15135	15134	200821_HELA_MGTG_iNrich_bRP_F12.raw	F1.12	NA	2529	3.41	1	FALSE	9.269e-06	4.408e-05	0.828
High	Sequest HT	Sequest HT (A5)	A	5	Unambiguous	EPAVYFKEQFLDGDGWTSR	[A].ePAVYFkEQFLDGDGWTSR.[W]	1	P27797	P27797	Calreticulin OS=Homo sapiens OX=9606 GN=CALR PE=1 SV=1	P27797	Calreticulin OS=Homo sapiens OX=9606 GN=CALR PE=1 SV=1	0	3	3	0.6256	0	1	1	1	831.077	831.077	2491.22	2491.22	-0.15	-0.00012	0/0	0	0	1.8338e+06	HCD	MS2	40.9623	120	117.896	40091	40091	40081	200821_HELA_MGTG_iNrich_bRP_F08.raw	F1.8	NA	2840	6.57	1	FALSE	9.269e-06	2.084e-07	1.414
High	Sequest HT	Sequest HT (A5)	A	5	Selected	EPAVYFKEQFLDGDGWTSR	[A].ePAVYFkEQFLDGDGWTSR.[W]	1	P27797	P27797	Calreticulin OS=Homo sapiens OX=9606 GN=CALR PE=1 SV=1	P27797	Calreticulin OS=Homo sapiens OX=9606 GN=CALR PE=1 SV=1	0	2	2	0.635	0	1	1	1	1246.11	1246.11	2491.21	2491.22	-3.57	-0.00445	0/0	0	0	483762	HCD	MS2	30.5265	120	117.978	40124	40124	40120	200821_HELA_MGTG_iNrich_bRP_F08.raw	F1.8	NA	2588	5.15	1	FALSE	9.269e-06	1.368e-12	2.714
High	Sequest HT	Sequest HT (A5)	A	5	Unambiguous	EPAVYFKEQFLDGDGWTSR	[A].ePAVYFkEQFLDGDGWTSR.[W]	1	P27797	P27797	Calreticulin OS=Homo sapiens OX=9606 GN=CALR PE=1 SV=1	P27797	Calreticulin OS=Homo sapiens OX=9606 GN=CALR PE=1 SV=1	0	3	3	0.6389	0	1	1	1	831.076	831.076	2491.21	2491.22	-1.04	-0.00086	0/0	0	0	2.36979e+06	HCD	MS2	9.38667	120	120.861	41263	41263	41251	200821_HELA_MGTG_iNrich_bRP_F08.raw	F1.8	NA	2782	6.73	1	FALSE	9.269e-06	1.365e-07	1.46
High	Sequest HT	Sequest HT (A5)	A	5	Unambiguous	EPAVYFKEQFLDGDGWTSR	[A].ePAVYFkEQFLDGDGWTSR.[W]	1	P27797	P27797	Calreticulin OS=Homo sapiens OX=9606 GN=CALR PE=1 SV=1	P27797	Calreticulin OS=Homo sapiens OX=9606 GN=CALR PE=1 SV=1	0	3	3	0.6572	0	1	1	1	831.077	831.077	2491.22	2491.22	0.07	6e-05	0/0	0	0	53794516	HCD	MS2	1.55045	3.219	121.643	40775	40775	40774	200821_HELA_MGTG_iNrich_bRP_F09.raw	F1.9	NA	2852	6.36	1	FALSE	9.269e-06	1.608e-07	1.442
High	Sequest HT	Sequest HT (A5)	A	5	Unambiguous	EPAVYFKEQFLDGDGWTSR	[A].ePAVYFkEQFLDGDGWTSR.[W]	1	P27797	P27797	Calreticulin OS=Homo sapiens OX=9606 GN=CALR PE=1 SV=1	P27797	Calreticulin OS=Homo sapiens OX=9606 GN=CALR PE=1 SV=1	0	2	2	0.5924	0	1	1	1	1246.11	1246.11	2491.21	2491.22	-1.69	-0.00211	0/0	0	0	4404424	HCD	MS2	0	96.993	121.81	40840	40840	40839	200821_HELA_MGTG_iNrich_bRP_F09.raw	F1.9	NA	2731	4.71	1	FALSE	9.269e-06	7.38e-12	2.53
High	Sequest HT	Sequest HT (A5)	A	5	Selected	EPAVYFKEQFLDGDGWTSR	[A].ePAVYFkEQFLDGDGWTSR.[W]	1	P27797	P27797	Calreticulin OS=Homo sapiens OX=9606 GN=CALR PE=1 SV=1	P27797	Calreticulin OS=Homo sapiens OX=9606 GN=CALR PE=1 SV=1	0	3	3	0.4948	0	1	1	1	831.077	831.077	2491.22	2491.22	0.5	0.00041	0/0	0	0	1.46022e+06	HCD	MS2	77.2749	120	117.963	39006	39006	38996	200821_HELA_MGTG_iNrich_bRP_F10.raw	F1.10	NA	2827	4.83	1	FALSE	9.269e-06	1.829e-05	0.926
High	Sequest HT	Sequest HT (A5)	A	5	Selected	EPAVYFKEQFLDGDGWTSR	[A].ePAVYFkEQFLDGDGWTSR.[W]	1	P27797	P27797	Calreticulin OS=Homo sapiens OX=9606 GN=CALR PE=1 SV=1	P27797	Calreticulin OS=Homo sapiens OX=9606 GN=CALR PE=1 SV=1	0	3	3	0.595	0	1	1	1	831.076	831.076	2491.21	2491.22	-0.77	-0.00064	0/0	0	0	489839	HCD	MS2	0	120	121.012	40199	40199	40191	200821_HELA_MGTG_iNrich_bRP_F10.raw	F1.10	NA	2772	6.05	1	FALSE	9.269e-06	4.255e-07	1.336
High	Sequest HT	Sequest HT (A5)	A	5	Unambiguous	EPAVYFKEQFLDGDGWTSR	[A].ePAVYFkEQFLDGDGWTSR.[W]	1	P27797	P27797	Calreticulin OS=Homo sapiens OX=9606 GN=CALR PE=1 SV=1	P27797	Calreticulin OS=Homo sapiens OX=9606 GN=CALR PE=1 SV=1	0	3	3	0.5967	0	1	1	1	831.07	831.07	2491.2	2491.22	-7.98	-0.00662	0/0	0	0	249598	HCD	MS2	39.2336	120	121.538	40401	40401	40399	200821_HELA_MGTG_iNrich_bRP_F10.raw	F1.10	NA	2394	5.48	1	FALSE	9.269e-06	1.863e-05	0.924
High	Sequest HT	Sequest HT (A5)	A	5	Unambiguous	EPAVYFKEQFLDGDGWTSR	[A].ePAVYFkEQFLDGDGWTSR.[W]	1	P27797	P27797	Calreticulin OS=Homo sapiens OX=9606 GN=CALR PE=1 SV=1	P27797	Calreticulin OS=Homo sapiens OX=9606 GN=CALR PE=1 SV=1	0	3	3	0.5203	0	1	1	1	831.076	831.076	2491.21	2491.22	-1.52	-0.00126	0/0	0	0	1.66576e+06	HCD	MS2	32.9156	113.321	120.922	40678	40678	40675	200821_HELA_MGTG_iNrich_bRP_F11.raw	F1.11	NA	2744	5.67	1	FALSE	9.269e-06	6.295e-06	1.042
High	Sequest HT	Sequest HT (A5)	A	5	Unambiguous	EPAVYFKEQFLDGDGWTSR	[A].ePAVYFkEQFLDGDGWTSR.[W]	1	P27797	P27797	Calreticulin OS=Homo sapiens OX=9606 GN=CALR PE=1 SV=1	P27797	Calreticulin OS=Homo sapiens OX=9606 GN=CALR PE=1 SV=1	0	3	3	0.5982	0	1	1	1	831.079	831.079	2491.22	2491.22	2.36	0.00196	0/0	0	0	599487	HCD	MS2	42.6778	99.9	121.448	40884	40884	40883	200821_HELA_MGTG_iNrich_bRP_F11.raw	F1.11	NA	2850	5.7	1	FALSE	1.762e-05	6.054e-05	0.793
High	Sequest HT	Sequest HT (A5)	A	5	Selected	EPAVYFKEQFLDGDGWTSR	[A].ePAVYFkEQFLDGDGWTSR.[W]	1	P27797	P27797	Calreticulin OS=Homo sapiens OX=9606 GN=CALR PE=1 SV=1	P27797	Calreticulin OS=Homo sapiens OX=9606 GN=CALR PE=1 SV=1	0	3	3	0.3774	0	1	1	1	831.077	831.077	2491.22	2491.22	0.73	0.00061	0/0	0	0	1708471	HCD	MS2	65.0486	120	122.412	42117	42117	42106	200925_HELA_iNrich_bRP_F09.raw	F2.9	NA	2843	4.61	1	FALSE	0.000182	0.001259	0.458
High	Sequest HT	Sequest HT (A5)	A	5	Unambiguous	EPAVYFKEQFLDGDGWTSR	[A].ePAVYFkEQFLDGDGWTSR.[W]	1	P27797	P27797	Calreticulin OS=Homo sapiens OX=9606 GN=CALR PE=1 SV=1	P27797	Calreticulin OS=Homo sapiens OX=9606 GN=CALR PE=1 SV=1	0	3	3	0.525	0	1	1	1	831.078	831.077	2491.22	2491.22	1.27	0.00105	0/0	0	0	1.76109e+06	HCD	MS2	48.5668	79.892	108.814	51155	51155	51145	220621_E_211.raw	F6.11	NA	2859	5.41	1	FALSE	9.269e-06	5.041e-05	0.813
High	Sequest HT	Sequest HT (A5)	A	5	Unambiguous	EPAVYFKEQFLDGDGWTSR	[A].ePAVYFkEQFLDGDGWTSR.[W]	1	P27797	P27797	Calreticulin OS=Homo sapiens OX=9606 GN=CALR PE=1 SV=1	P27797	Calreticulin OS=Homo sapiens OX=9606 GN=CALR PE=1 SV=1	0	2	2	0.5969	0	1	1	1	1246.11	1246.11	2491.22	2491.22	0.85	0.00106	0/0	0	0	2.02557e+06	HCD	MS2	0	94.991	109.074	51331	51331	51327	220621_E_212.raw	F6.12	NA	2829	4.59	1	FALSE	9.269e-06	6.612e-13	2.793
High	Sequest HT	Sequest HT (A5)	A	5	Selected	EPAVYFKEQFLDGDGWTSR	[A].ePAVYFkEQFLDGDGWTSR.[W]	1	P27797	P27797	Calreticulin OS=Homo sapiens OX=9606 GN=CALR PE=1 SV=1	P27797	Calreticulin OS=Homo sapiens OX=9606 GN=CALR PE=1 SV=1	0	3	3	0.5499	0	1	1	1	831.077	831.077	2491.22	2491.22	0.04	3e-05	0/0	0	0	9877223	HCD	MS2	68.6163	5.523	109.112	51351	51351	51340	220621_E_212.raw	F6.12	NA	2851	4.31	1	FALSE	3.982e-05	0.000183	0.666
High	Sequest HT	Sequest HT (A5)	A	5	Selected	EPAVYFKEQFLDGDGWTSR	[A].ePAVYFkEQFLDGDGWTSR.[W]	1	P27797	P27797	Calreticulin OS=Homo sapiens OX=9606 GN=CALR PE=1 SV=1	P27797	Calreticulin OS=Homo sapiens OX=9606 GN=CALR PE=1 SV=1	0	3	0	0.5348	0	1	1	1	831.077	831.077	2491.22	2491.22	0.11	0.0001	0/0	0	0	9422558	HCD	MS2	88.0051	10.898	109.125	51357	51357	51353	220621_E_212.raw	F6.12	NA	2851	4.88	1	FALSE	9.269e-06	2.14e-06	1.16
High	Sequest HT	Sequest HT (A5)	A	5	Selected	EPAVYFKEQFLDGDGWTSR	[A].ePAVYFkEQFLDGDGWTSR.[W]	1	P27797	P27797	Calreticulin OS=Homo sapiens OX=9606 GN=CALR PE=1 SV=1	P27797	Calreticulin OS=Homo sapiens OX=9606 GN=CALR PE=1 SV=1	0	3	0	0.536	0	1	1	1	831.077	831.077	2491.22	2491.22	0.58	0.00048	0/0	0	0	663526	HCD	MS2	95.2363	31.044	111.41	48130	48130	48129	220621_E_302.raw	F7.2	NA	2824	5.56	1	FALSE	9.269e-06	2.772e-06	1.132
High	Sequest HT	Sequest HT (A5)	A	5	Selected	EPAVYFKEQFLDGDGWTSR	[A].ePAVYFkEQFLDGDGWTSR.[W]	1	P27797	P27797	Calreticulin OS=Homo sapiens OX=9606 GN=CALR PE=1 SV=1	P27797	Calreticulin OS=Homo sapiens OX=9606 GN=CALR PE=1 SV=1	0	3	3	0.541	0	1	1	1	831.077	831.077	2491.22	2491.22	0.51	0.00042	0/0	0	0	2618598	HCD	MS2	36.3966	30.843	111.442	48146	48146	48142	220621_E_302.raw	F7.2	NA	2822	5.36	1	FALSE	9.269e-06	4.314e-06	1.084
High	Sequest HT	Sequest HT (A5)	A	5	Unambiguous	EPAVYFKEQFLDGDGWTSR	[A].ePAVYFkEQFLDGDGWTSR.[W]	1	P27797	P27797	Calreticulin OS=Homo sapiens OX=9606 GN=CALR PE=1 SV=1	P27797	Calreticulin OS=Homo sapiens OX=9606 GN=CALR PE=1 SV=1	0	2	2	0.3934	0	1	1	1	1246.11	1246.11	2491.22	2491.22	0.17	0.00022	0/0	0	0	789479	HCD	MS2	0	120	111.533	48190	48190	48181	220621_E_302.raw	F7.2	NA	2846	2.72	1	FALSE	9.269e-06	1.724e-06	1.184
High	Sequest HT	Sequest HT (A5)	A	5	Unambiguous	EPAVYFKEQFLDGDGWTSR	[A].ePAVYFkEQFLDGDGWTSR.[W]	1	P27797	P27797	Calreticulin OS=Homo sapiens OX=9606 GN=CALR PE=1 SV=1	P27797	Calreticulin OS=Homo sapiens OX=9606 GN=CALR PE=1 SV=1	0	3	3	0.6036	0	1	1	1	831.075	831.075	2491.21	2491.22	-1.98	-0.00165	0/0	0	0	16487888	HCD	MS2	14.6781	10.523	111.962	48403	48403	48402	220621_E_302.raw	F7.2	NA	2706	6.08	1	FALSE	9.269e-06	1.345e-07	1.462
High	Sequest HT	Sequest HT (A5)	A	5	Selected	EPAVYFKEQFLDGDGWTSR	[A].ePAVYFkEQFLDGDGWTSR.[W]	1	P27797	P27797	Calreticulin OS=Homo sapiens OX=9606 GN=CALR PE=1 SV=1	P27797	Calreticulin OS=Homo sapiens OX=9606 GN=CALR PE=1 SV=1	0	2	2	0.425	0	1	1	1	1246.1	1246.1	2491.2	2491.22	-5.7	-0.0071	0/0	0	0	2.67344e+06	HCD	MS2	0	83.39	112.062	48455	48455	48454	220621_E_302.raw	F7.2	NA	2541	3.2	1	FALSE	9.269e-06	3.29e-09	1.866
High	Sequest HT	Sequest HT (A5)	A	5	Selected	EPAVYFKEQFLDGDGWTSR	[A].ePAVYFkEQFLDGDGWTSR.[W]	1	P27797	P27797	Calreticulin OS=Homo sapiens OX=9606 GN=CALR PE=1 SV=1	P27797	Calreticulin OS=Homo sapiens OX=9606 GN=CALR PE=1 SV=1	0	3	3	0.3567	0	1	1	1	831.073	831.073	2491.2	2491.22	-4.48	-0.00372	0/0	0	0	2066402	HCD	MS2	73.538	120	110.789	48725	48725	48714	220621_E_305.raw	F7.5	NA	2587	3.28	1	FALSE	0.001105	0.009873	0.25
High	Sequest HT	Sequest HT (A5)	A	5	Unambiguous	EPAVYFKEQFLDGDGWTSR	[A].ePAVYFkEQFLDGDGWTSR.[W]	1	P27797	P27797	Calreticulin OS=Homo sapiens OX=9606 GN=CALR PE=1 SV=1	P27797	Calreticulin OS=Homo sapiens OX=9606 GN=CALR PE=1 SV=1	0	3	3	0.5493	0	1	1	1	831.076	831.076	2491.21	2491.22	-0.71	-0.00059	0/0	0	0	2.67992e+06	HCD	MS2	26.726	106.756	106.753	40136	40136	40130	220621_E_311.raw	F7.11	NA	2789	6.08	1	FALSE	9.269e-06	3.883e-07	1.346
High	Sequest HT	Sequest HT (A5)	A	5	Unambiguous	EPAVYFKEQFLDGDGWTSR	[A].ePAVYFkEQFLDGDGWTSR.[W]	1	P27797	P27797	Calreticulin OS=Homo sapiens OX=9606 GN=CALR PE=1 SV=1	P27797	Calreticulin OS=Homo sapiens OX=9606 GN=CALR PE=1 SV=1	0	2	2	0.5088	0	1	1	1	1246.11	1246.11	2491.21	2491.22	-2.85	-0.00355	0/0	0	0	903735	HCD	MS2	0	120	106.838	40175	40175	40169	220621_E_311.raw	F7.11	NA	2683	3.99	1	FALSE	9.269e-06	2.921e-10	2.13
High	Sequest HT	Sequest HT (A5)	A	5	Unambiguous	EPAVYFKEQFLDGDGWTSR	[A].ePAVYFkEQFLDGDGWTSR.[W]	1	P27797	P27797	Calreticulin OS=Homo sapiens OX=9606 GN=CALR PE=1 SV=1	P27797	Calreticulin OS=Homo sapiens OX=9606 GN=CALR PE=1 SV=1	0	3	3	0.5942	0	1	1	1	831.074	831.074	2491.21	2491.22	-3.29	-0.00273	0/0	0	0	1.59839e+06	HCD	MS2	31.7239	109.614	109.982	41537	41537	41534	220621_E_311.raw	F7.11	NA	2624	6.16	1	FALSE	9.269e-06	4.399e-06	1.082
High	Sequest HT	Sequest HT (A5)	A	5	Unambiguous	EPAVYFKEQFLDGDGWTSR	[A].ePAVYFkEQFLDGDGWTSR.[W]	1	P27797	P27797	Calreticulin OS=Homo sapiens OX=9606 GN=CALR PE=1 SV=1	P27797	Calreticulin OS=Homo sapiens OX=9606 GN=CALR PE=1 SV=1	0	2	2	0.1396	0	1	1	1	1246.12	1246.12	2491.22	2491.22	3.46	0.0043	0/0	0	0	815500	HCD	MS2	0	120	110.042	41563	41563	41560	220621_E_311.raw	F7.11	NA	2900	2.22	1	FALSE	9.269e-06	1.422e-06	1.205
High	Sequest HT	Sequest HT (A5)	A	5	Selected	EPAVYFKEQFLDGDGWTSR	[A].ePAVYFkEQFLDGDGWTSR.[W]	1	P27797	P27797	Calreticulin OS=Homo sapiens OX=9606 GN=CALR PE=1 SV=1	P27797	Calreticulin OS=Homo sapiens OX=9606 GN=CALR PE=1 SV=1	0	3	0	0.3262	0	1	1	1	831.076	831.076	2491.21	2491.22	-0.4	-0.00033	0/0	0	0	2799584	HCD	MS2	73.8426	95.589	108.608	42468	42468	42458	220621_E_312.raw	F7.12	NA	2792	3.74	1	FALSE	7.925e-05	0.0004274	0.572
High	Sequest HT	Sequest HT (A5)	A	5	Unambiguous	EPAVYFKEQFLDGDGWTSR	[A].ePAVYFkEQFLDGDGWTSR.[W]	1	P27797	P27797	Calreticulin OS=Homo sapiens OX=9606 GN=CALR PE=1 SV=1	P27797	Calreticulin OS=Homo sapiens OX=9606 GN=CALR PE=1 SV=1	0	2	2	0.6201	0	1	1	1	1246.11	1246.11	2491.21	2491.22	-0.48	-0.00059	0/0	0	0	1.15553e+06	HCD	MS2	0	120	111.606	43803	43803	43797	220621_E_312.raw	F7.12	NA	2771	4.58	1	FALSE	9.269e-06	3.453e-11	2.362
High	Sequest HT	Sequest HT (A5)	A	5	Selected	EPAVYFKEQFLDGDGWTSR	[A].ePAVYFkEQFLDGDGWTSR.[W]	1	P27797	P27797	Calreticulin OS=Homo sapiens OX=9606 GN=CALR PE=1 SV=1	P27797	Calreticulin OS=Homo sapiens OX=9606 GN=CALR PE=1 SV=1	0	3	3	0.6704	0	1	1	1	831.077	831.077	2491.22	2491.22	0.6	0.00049	0/0	0	0	34928184	HCD	MS2	3.28989	4.976	111.856	43915	43915	43914	220621_E_312.raw	F7.12	NA	2825	7.16	1	FALSE	9.269e-06	6.015e-09	1.8
High	Sequest HT	Sequest HT (A5)	A	5	Unambiguous	EPAVYFKEQFLDGDGWTSR	[A].ePAVYFkEQFLDGDGWTSR.[W]	1	P27797	P27797	Calreticulin OS=Homo sapiens OX=9606 GN=CALR PE=1 SV=1	P27797	Calreticulin OS=Homo sapiens OX=9606 GN=CALR PE=1 SV=1	0	3	3	0.5997	0	1	1	1	831.077	831.077	2491.22	2491.22	0.43	0.00036	0/0	0	0	59084760	HCD	MS2	5.86489	4.001	112.09	44017	44017	44005	220621_E_312.raw	F7.12	NA	2840	5.92	1	FALSE	9.269e-06	1.224e-05	0.97
High	Sequest HT	Sequest HT (A5)	A	5	Selected	EPAVYFKEQFLDGDGWTSR	[A].ePAVYFkEQFLDGDGWTSR.[W]	1	P27797	P27797	Calreticulin OS=Homo sapiens OX=9606 GN=CALR PE=1 SV=1	P27797	Calreticulin OS=Homo sapiens OX=9606 GN=CALR PE=1 SV=1	0	2	2	0.6294	0	1	1	1	1246.11	1246.11	2491.22	2491.22	0.35	0.00044	0/0	0	0	6905691	HCD	MS2	0	40.053	112.13	44032	44032	44031	220621_E_312.raw	F7.12	NA	2859	5.1	1	FALSE	9.269e-06	1.085e-12	2.739
High	Sequest HT	Sequest HT (A5)	A	5	Unambiguous	EPAVYFKEQFLDGDGWTSR	[A].ePAVYFkEQFLDGDGWTSR.[W]	1	P27797	P27797	Calreticulin OS=Homo sapiens OX=9606 GN=CALR PE=1 SV=1	P27797	Calreticulin OS=Homo sapiens OX=9606 GN=CALR PE=1 SV=1	0	3	3	0.5808	0	1	1	1	831.077	831.077	2491.22	2491.22	0.35	0.00029	0/0	0	0	37117884	HCD	MS2	10.0789	6.165	112.183	44055	44055	44044	220621_E_312.raw	F7.12	NA	2859	5.63	1	FALSE	9.269e-06	3.975e-06	1.093
High	Sequest HT	Sequest HT (A5)	A	5	Selected	EPAVYFKEQFLDGDGWTSR	[A].ePAVYFkEQFLDGDGWTSR.[W]	1	P27797	P27797	Calreticulin OS=Homo sapiens OX=9606 GN=CALR PE=1 SV=1	P27797	Calreticulin OS=Homo sapiens OX=9606 GN=CALR PE=1 SV=1	0	3	3	0.5577	0	1	1	1	831.077	831.077	2491.22	2491.22	0.18	0.00015	0/0	0	0	7511958	HCD	MS2	53.6278	10.749	112.373	44137	44137	44135	220621_E_312.raw	F7.12	NA	2847	4.07	1	FALSE	9.269e-06	5.781e-06	1.052
High	Sequest HT	Sequest HT (A5)	A	5	Unambiguous	EPAVYFKEQFLDGDGWTSR	[A].ePAVYFkEQFLDGDGWTSR.[W]	1	P27797	P27797	Calreticulin OS=Homo sapiens OX=9606 GN=CALR PE=1 SV=1	P27797	Calreticulin OS=Homo sapiens OX=9606 GN=CALR PE=1 SV=1	0	3	3	0.6032	0	1	1	1	831.077	831.077	2491.22	2491.22	-0.04	-4e-05	0/0	0	0	5.01599e+06	HCD	MS2	25.1792	59.225	112.415	44157	44157	44148	220621_E_312.raw	F7.12	NA	2846	6.93	1	FALSE	9.269e-06	8.144e-07	1.265
High	Sequest HT	Sequest HT (A5)	A	5	Selected	EPAVYFKEQFLDGDGWTSR	[A].ePAVYFkEQFLDGDGWTSR.[W]	1	P27797	P27797	Calreticulin OS=Homo sapiens OX=9606 GN=CALR PE=1 SV=1	P27797	Calreticulin OS=Homo sapiens OX=9606 GN=CALR PE=1 SV=1	0	3	3	0.593	0	1	1	1	831.074	831.074	2491.21	2491.22	-2.86	-0.00238	0/0	0	0	1373855	HCD	MS2	57.2323	63.305	112.668	44264	44264	44252	220621_E_312.raw	F7.12	NA	2683	4.89	1	FALSE	9.269e-06	1.629e-06	1.19
High	Sequest HT	Sequest HT (A5)	A	5	Selected	EPAVYFKEQFLDGDGWTSR	[A].ePAVYFkEQFLDGDGWTSR.[W]	1	P27797	P27797	Calreticulin OS=Homo sapiens OX=9606 GN=CALR PE=1 SV=1	P27797	Calreticulin OS=Homo sapiens OX=9606 GN=CALR PE=1 SV=1	0	3	3	0.6143	0	1	1	1	831.076	831.076	2491.21	2491.22	-0.44	-0.00037	0/0	0	0	1.88006e+06	HCD	MS2	55.5106	54.805	112.704	44280	44280	44278	220621_E_312.raw	F7.12	NA	2776	4.9	1	FALSE	9.269e-06	1.64e-05	0.938
High	Sequest HT	Sequest HT (A5)	A	5	Unambiguous	EPAVYFKEQFLDGDGWTSR	[A].ePAVYFkEQFLDGDGWTSR.[W]	1	P27797	P27797	Calreticulin OS=Homo sapiens OX=9606 GN=CALR PE=1 SV=1	P27797	Calreticulin OS=Homo sapiens OX=9606 GN=CALR PE=1 SV=1	0	3	3	0.6747	0	1	1	1	831.078	831.078	2491.22	2491.22	0.84	0.0007	0/0	0	0	456818	HCD	MS2	0	120	98.9642	37452	37452	37443	220428_iNrich_HELA_MG132_Trypsin_12.raw	F12.12	NA	2829	5.01	1	FALSE	9.269e-06	1.291e-08	1.717
High	Sequest HT	Sequest HT (A5)	A	5	Selected	EPSPDIEGEIKR	[T].ePSPDIEGEIkR.[D]	1	P27816	P27816	Microtubule-associated protein 4 OS=Homo sapiens OX=9606 GN=MAP4 PE=1 SV=3	P27816	Microtubule-associated protein 4 OS=Homo sapiens OX=9606 GN=MAP4 PE=1 SV=3	0	2	2	0.3783	0	1	1	1	808.437	808.437	1615.87	1615.86	7.02	0.00567	0/0	0	0	945586	HCD	MS2	18.2142	120	76.4078	22430	22430	22422	200821_HELA_MGTG_iNrich_bRP_F02.raw	F1.2	NA	2200	2.67	1	FALSE	0.002293	0.02006	0.173
High	Sequest HT	Sequest HT (A5)	A	5	Unambiguous	EPSPDIEGEIKR	[T].ePSPDIEGEIkR.[D]	1	P27816	P27816	Microtubule-associated protein 4 OS=Homo sapiens OX=9606 GN=MAP4 PE=1 SV=3	P27816	Microtubule-associated protein 4 OS=Homo sapiens OX=9606 GN=MAP4 PE=1 SV=3	0	2	2	0.3205	0	1	1	1	808.435	808.435	1615.86	1615.86	4.07	0.00329	0/0	0	0	2.58897e+06	HCD	MS2	19.3701	52.432	62.7883	26816	26816	26809	220621_E_205.raw	F6.5	NA	2292	3.37	1	FALSE	0.0001443	0.001052	0.476
High	Sequest HT	Sequest HT (A5)	A	5	Unambiguous	EPSPDIEGEIKR	[T].ePSPDIEGEIkR.[D]	1	P27816	P27816	Microtubule-associated protein 4 OS=Homo sapiens OX=9606 GN=MAP4 PE=1 SV=3	P27816	Microtubule-associated protein 4 OS=Homo sapiens OX=9606 GN=MAP4 PE=1 SV=3	0	2	2	0.4218	0	1	1	1	808.433	808.433	1615.86	1615.86	1.94	0.00157	0/0	0	0	3.24582e+06	HCD	MS2	16.4454	58.69	63.9738	25722	25722	25717	220621_E_305.raw	F7.5	NA	2373	3.58	1	FALSE	5.203e-05	0.0003078	0.608
High	Sequest HT	Sequest HT (A5)	A	5	Selected	ESREVSTGTTIMAVQFDGGVVLGADSR	[W].eSREVSTGTTImAVQFDGGVVLGADSR.[T]	1	P28072	P28072	Proteasome subunit beta type-6 OS=Homo sapiens OX=9606 GN=PSMB6 PE=1 SV=4	P28072	Proteasome subunit beta type-6 OS=Homo sapiens OX=9606 GN=PSMB6 PE=1 SV=4	1	3	0	0.2762	0	1	1	1	1000.5	1000.5	2999.5	2999.49	1.36	0.00136	0/0	0	0	5666807	HCD	MS2	75.1436	56.044	99.8588	44875	44875	44866	220621_E_112.raw	F5.12	NA	3404	3.44	1	FALSE	0.003264	0.02879	0.132
High	Sequest HT	Sequest HT (A5)	A	5	Selected	NKLSGGGGRR	[M].nkLSGGGGRR.[T]	1	P29353	P29353	SHC-transforming protein 1 OS=Homo sapiens OX=9606 GN=SHC1 PE=1 SV=4	P29353	SHC-transforming protein 1 OS=Homo sapiens OX=9606 GN=SHC1 PE=1 SV=4	1	3	3	0.1944	0	1	1	1	416.906	416.907	1248.7	1248.7	0.51	0.00021	0/0	0	0	211658	HCD	MS2	52.1535	120	32.8107	8904	8904	8895	220621_E_209.raw	F6.9	NA	1540	2.52	1	FALSE	0.0006501	0.005562	0.308
High	Sequest HT	Sequest HT (A5)	A	5	Unambiguous	DVLELTDDNFESR	[S].dVLELTDDNFESR.[I]	1	P30101	P30101	Protein disulfide-isomerase A3 OS=Homo sapiens OX=9606 GN=PDIA3 PE=1 SV=4	P30101	Protein disulfide-isomerase A3 OS=Homo sapiens OX=9606 GN=PDIA3 PE=1 SV=4	0	3	3	0.5909	0	1	1	1	585.285	585.285	1753.84	1753.84	-1.29	-0.00076	0/0	0	0	1.72454e+06	HCD	MS2	34.8227	58.829	96.8072	30459	30459	30453	200821_HELA_MGTG_iNrich_bRP_F06.raw	F1.6	NA	2066	4.4	1	FALSE	9.269e-06	3.71e-06	1.1
High	Sequest HT	Sequest HT (A5)	A	5	Selected	DVLELTDDNFESR	[S].dVLELTDDNFESR.[I]	1	P30101	P30101	Protein disulfide-isomerase A3 OS=Homo sapiens OX=9606 GN=PDIA3 PE=1 SV=4	P30101	Protein disulfide-isomerase A3 OS=Homo sapiens OX=9606 GN=PDIA3 PE=1 SV=4	0	2	2	0.4119	0	1	1	1	877.421	877.421	1753.84	1753.84	-4.45	-0.0039	0/0	0	0	2.07402e+06	HCD	MS2	54.906	50.345	96.8718	30485	30485	30479	200821_HELA_MGTG_iNrich_bRP_F06.raw	F1.6	NA	1948	3.86	1	FALSE	9.269e-06	4.689e-05	0.821
High	Sequest HT	Sequest HT (A5)	A	5	Unambiguous	DVLELTDDNFESR	[S].dVLELTDDNFESR.[I]	1	P30101	P30101	Protein disulfide-isomerase A3 OS=Homo sapiens OX=9606 GN=PDIA3 PE=1 SV=4	P30101	Protein disulfide-isomerase A3 OS=Homo sapiens OX=9606 GN=PDIA3 PE=1 SV=4	0	3	3	0.6086	0	1	1	1	585.286	585.285	1753.84	1753.84	-0.62	-0.00036	0/0	0	0	420943	HCD	MS2	36.8239	120	84.1379	29905	29905	29899	220621_E_311.raw	F7.11	NA	2087	3.96	1	FALSE	9.666e-05	0.0005385	0.547
High	Sequest HT	Sequest HT (A5)	A	5	Selected	DVLGVKPNATQEELKKAYR	[Y].dVLGVkPNATQEELkkAYR.[K]	1	P31689	P31689	DnaJ homolog subfamily A member 1 OS=Homo sapiens OX=9606 GN=DNAJA1 PE=1 SV=2	P31689	DnaJ homolog subfamily A member 1 OS=Homo sapiens OX=9606 GN=DNAJA1 PE=1 SV=2	0	3	0	0.1313	0	1	1	1	832.473	832.474	2495.41	2495.4	1.97	0.00164	0/0	0	0	4.8837e+06	HCD	MS2	77.9912	68.521	119.466	56225	56225	56215	220621_E_212.raw	F6.12	NoneMonoisotopic	1192	3.2	1	FALSE	0.003504	0.03116	0.123
High	Sequest HT	Sequest HT (A5)	A	5	Unambiguous	DVLGVKPNATQEELKKAYR	[Y].dVLGVkPNATQEELkkAYR.[K]	1	P31689	P31689	DnaJ homolog subfamily A member 1 OS=Homo sapiens OX=9606 GN=DNAJA1 PE=1 SV=2	P31689	DnaJ homolog subfamily A member 1 OS=Homo sapiens OX=9606 GN=DNAJA1 PE=1 SV=2	0	3	0	0.2801	0	1	1	1	832.474	832.474	2495.41	2495.4	2.94	0.00244	0/0	0	0	1981824	HCD	MS2	73.9939	120	123.301	48719	48719	48711	220621_E_312.raw	F7.12	NoneMonoisotopic	1155	3.32	1	FALSE	0.0006157	0.00529	0.313
High	Sequest HT	Sequest HT (A5)	A	5	Selected	DKSELVQKAKLAEQAER	[M].dkSELVQkAkLAEQAER.[Y]	1	P31946	P31946	14-3-3 protein beta/alpha OS=Homo sapiens OX=9606 GN=YWHAB PE=1 SV=3	P31946	14-3-3 protein beta/alpha OS=Homo sapiens OX=9606 GN=YWHAB PE=1 SV=3	0	3	0	0.3696	0	1	1	1	760.429	760.429	2279.27	2279.27	-0.95	-0.00072	0/0	0	0	5.33148e+06	HCD	MS2	88.0113	7.197	101.978	49099	49099	49091	220621_E_206.raw	F6.6	NA	1461	2.3	1	FALSE	0.000182	0.001261	0.458
High	Sequest HT	Sequest HT (A5)	A	5	Selected	EGGLGPLNIPLLADVTR	[K].eGGLGPLNIPLLADVTR.[R]	1	P32119	P32119	Peroxiredoxin-2 OS=Homo sapiens OX=9606 GN=PRDX2 PE=1 SV=5	P32119	Peroxiredoxin-2 OS=Homo sapiens OX=9606 GN=PRDX2 PE=1 SV=5	0	2	2	0.4948	0	1	1	1	968.551	968.551	1936.09	1936.11	-5.78	-0.0056	0/0	0	0	516332	HCD	MS2	82.9256	93.957	130.707	45195	45195	45193	200821_HELA_MGTG_iNrich_bRP_F08.raw	F1.8	NA	1453	3.86	1	FALSE	3.982e-05	0.0001019	0.733
High	Sequest HT	Sequest HT (A5)	A	5	Selected	EGGLGPLNIPLLADVTRR	[K].eGGLGPLNIPLLADVTRR.[L]	1	P32119	P32119	Peroxiredoxin-2 OS=Homo sapiens OX=9606 GN=PRDX2 PE=1 SV=5	P32119	Peroxiredoxin-2 OS=Homo sapiens OX=9606 GN=PRDX2 PE=1 SV=5	1	3	3	0.5267	0	1	1	1	698.07	698.07	2092.19	2092.21	-5.98	-0.00417	0/0	0	0	1076041	HCD	MS2	3.26227	120	122.266	42415	42415	42412	200821_HELA_MGTG_iNrich_bRP_F12.raw	F1.12	NA	1084	3.93	1	FALSE	0.0002887	0.002025	0.409
High	Sequest HT	Sequest HT (A5)	A	5	Selected	QHEAKIKSLTEYLQNVEQKKR	[S].qHEAkIkSLTEYLQNVEQkkR.[Q]	1	P33176	P33176	Kinesin-1 heavy chain OS=Homo sapiens OX=9606 GN=KIF5B PE=1 SV=1	P33176	Kinesin-1 heavy chain OS=Homo sapiens OX=9606 GN=KIF5B PE=1 SV=1	0	3	3	0.1229	0	1	1	1	984.886	984.886	2952.64	2952.64	2.41	0.00237	0/0	0	0	4766615	HCD	MS2	63.4454	60.119	110.645	36586	36586	36574	200925_HELA_iNrich_bRP_F03.raw	F2.3	NA	1378	2.36	1	FALSE	0.0008721	0.007794	0.274
High	Sequest HT	Sequest HT (A5)	A	5	Unambiguous	NATFTWAR	[R].nATFTWAR.[S]	1	P33527	P33527	Multidrug resistance-associated protein 1 OS=Homo sapiens OX=9606 GN=ABCC1 PE=1 SV=3	P33527	Multidrug resistance-associated protein 1 OS=Homo sapiens OX=9606 GN=ABCC1 PE=1 SV=3	0	2	2	0.1266	0	1	1	1	584.803	584.803	1168.6	1168.59	3.81	0.00222	0/0	0	0	1.94095e+06	HCD	MS2	24.4196	120	65.017	23447	23447	23442	220428_iNrich_HELA_MG132_Trypsin_09.raw	F12.9	NA	1847	2.37	1	FALSE	0.001805	0.01581	0.2
High	Sequest HT	Sequest HT (A5)	A	5	Unambiguous	QVFEDVQR	[F].qVFEDVQR.[C]	1	P33897	P33897	ATP-binding cassette sub-family D member 1 OS=Homo sapiens OX=9606 GN=ABCD1 PE=1 SV=2	P33897	ATP-binding cassette sub-family D member 1 OS=Homo sapiens OX=9606 GN=ABCD1 PE=1 SV=2	0	2	0	0.3451	0	1	1	1	611.816	611.816	1222.62	1222.63	-0.38	-0.00023	0/0	0	0	3830137	HCD	MS2	70.8004	12.885	61.2839	23833	23833	23832	220621_E_210.raw	F6.10	NA	2246	2.55	1	FALSE	0.0002075	0.001542	0.437
High	Sequest HT	Sequest HT (A5)	A	5	Unambiguous	QVFEDVQR	[F].qVFEDVQR.[C]	1	P33897	P33897	ATP-binding cassette sub-family D member 1 OS=Homo sapiens OX=9606 GN=ABCD1 PE=1 SV=2	P33897	ATP-binding cassette sub-family D member 1 OS=Homo sapiens OX=9606 GN=ABCD1 PE=1 SV=2	0	2	0	0.3515	0	1	1	1	611.817	611.817	1222.63	1222.63	1.44	0.00088	0/0	0	0	1.89253e+06	HCD	MS2	57.0393	38.688	60.8395	21475	21475	21466	220428_iNrich_HELA_MG132_Trypsin_09.raw	F12.9	NA	2191	2.93	1	FALSE	3.982e-05	0.0001718	0.673
High	Sequest HT	Sequest HT (A5)	A	5	Selected	QVFEDVQR	[F].qVFEDVQR.[C]	1	P33897	P33897	ATP-binding cassette sub-family D member 1 OS=Homo sapiens OX=9606 GN=ABCD1 PE=1 SV=2	P33897	ATP-binding cassette sub-family D member 1 OS=Homo sapiens OX=9606 GN=ABCD1 PE=1 SV=2	0	2	2	0.358	0	1	1	1	611.817	611.817	1222.63	1222.63	1.04	0.00064	0/0	0	0	2.30849e+06	HCD	MS2	9.31105	60.541	60.9466	21520	21520	21518	220428_iNrich_HELA_MG132_Trypsin_09.raw	F12.9	NA	2161	3.38	1	FALSE	3.982e-05	0.0002449	0.633
High	Sequest HT	Sequest HT (A5)	A	5	Unambiguous	EALSKMKLQPFATEADVEEALR	[A].eALSkMkLQPFATEADVEEALR.[L]	1	P33992	P33992	DNA replication licensing factor MCM5 OS=Homo sapiens OX=9606 GN=MCM5 PE=1 SV=5	P33992	DNA replication licensing factor MCM5 OS=Homo sapiens OX=9606 GN=MCM5 PE=1 SV=5	0	3	3	0.5566	0	1	1	1	923.161	923.161	2767.47	2767.46	1.39	0.00128	0/0	0	0	1.16685e+06	HCD	MS2	43.0021	120	119.907	41486	41486	41476	200821_HELA_MGTG_iNrich_bRP_F12.raw	F1.12	NA	2818	4.24	1	FALSE	9.516e-05	0.0005285	0.549
High	Sequest HT	Sequest HT (A5)	A	5	Selected	EALSKMKLQPFATEADVEEALR	[A].eALSkMkLQPFATEADVEEALR.[L]	1	P33992	P33992	DNA replication licensing factor MCM5 OS=Homo sapiens OX=9606 GN=MCM5 PE=1 SV=5	P33992	DNA replication licensing factor MCM5 OS=Homo sapiens OX=9606 GN=MCM5 PE=1 SV=5	0	3	3	0.3636	0	1	1	1	923.156	923.156	2767.45	2767.46	-4.17	-0.00385	0/0	0	0	522229	HCD	MS2	70.2682	120	114.669	35190	35190	35179	200925_HELA_iNrich_bRP_F07.raw	F2.7	NoneMonoisotopic	3071	5.17	1	FALSE	0.0003433	0.002668	0.381
High	Sequest HT	Sequest HT (A5)	A	5	Selected	EALSKMKLQPFATEADVEEALR	[A].eALSkMkLQPFATEADVEEALR.[L]	1	P33992	P33992	DNA replication licensing factor MCM5 OS=Homo sapiens OX=9606 GN=MCM5 PE=1 SV=5	P33992	DNA replication licensing factor MCM5 OS=Homo sapiens OX=9606 GN=MCM5 PE=1 SV=5	0	2	2	0.5965	0	1	1	1	1384.24	1384.24	2767.47	2767.46	1.38	0.00191	0/0	0	0	1.27001e+06	HCD	MS2	0	120	114.842	35256	35256	35244	200925_HELA_iNrich_bRP_F07.raw	F2.7	NA	2820	4.04	1	FALSE	9.269e-06	2.357e-07	1.4
High	Sequest HT	Sequest HT (A5)	A	5	Selected	QHSNAAQTQTGEANR	[A].qHSNAAQTQTGEANR.[G]	1	P34897	P34897	Serine hydroxymethyltransferase, mitochondrial OS=Homo sapiens OX=9606 GN=SHMT2 PE=1 SV=3	P34897	Serine hydroxymethyltransferase, mitochondrial OS=Homo sapiens OX=9606 GN=SHMT2 PE=1 SV=3	0	3	3	0.5511	0	1	1	1	605.624	605.624	1814.86	1814.86	-0.44	-0.00027	0/0	0	0	451722	HCD	MS2	2.7049	120	39.0354	6409	6409	6406	200821_HELA_MGTG_iNrich_bRP_F11.raw	F1.11	NA	1728	5.68	1	FALSE	9.269e-06	4.82e-07	1.323
High	Sequest HT	Sequest HT (A5)	A	5	Unambiguous	QHSNAAQTQTGEANR	[A].qHSNAAQTQTGEANR.[G]	1	P34897	P34897	Serine hydroxymethyltransferase, mitochondrial OS=Homo sapiens OX=9606 GN=SHMT2 PE=1 SV=3	P34897	Serine hydroxymethyltransferase, mitochondrial OS=Homo sapiens OX=9606 GN=SHMT2 PE=1 SV=3	0	3	3	0.5496	0	1	1	1	605.623	605.623	1814.86	1814.86	-0.46	-0.00028	0/0	0	0	309466	HCD	MS2	0	120	19.962	3726	3726	3721	220428_iNrich_HELA_MG132_Trypsin_12.raw	F12.12	NA	1750	3.93	1	FALSE	9.269e-06	1.743e-06	1.183
High	Sequest HT	Sequest HT (A5)	A	5	Unambiguous	DPASKSR	[G].dPASkSR.[S]	1	P35052	P35052	Glypican-1 OS=Homo sapiens OX=9606 GN=GPC1 PE=1 SV=2	P35052	Glypican-1 OS=Homo sapiens OX=9606 GN=GPC1 PE=1 SV=2	0	2	2	0.1	0	1	1	1	503.781	503.781	1006.55	1006.55	0.05	3e-05	0/0	0	0	1.94927e+06	HCD	MS2	45.3356	46.263	43.205	8190	8190	8187	200821_HELA_MGTG_iNrich_bRP_F02.raw	F1.2	NA	1670	2	1	FALSE	0.001662	0.01477	0.207
High	Sequest HT	Sequest HT (A5)	A	5	Selected	NLEAGNVKETR	[A].nLEAGNVkETR.[A]	1	P35555	P35555	Fibrillin-1 OS=Homo sapiens OX=9606 GN=FBN1 PE=1 SV=4	P35555	Fibrillin-1 OS=Homo sapiens OX=9606 GN=FBN1 PE=1 SV=4	0	2	2	0.36	0	1	1	1	739.398	739.398	1477.79	1477.79	0.73	0.00054	0/0	0	0	1.13894e+06	HCD	MS2	0	120	63.292	16917	16917	16911	200821_HELA_MGTG_iNrich_bRP_F03.raw	F1.3	NA	2265	4	1	FALSE	9.269e-06	1.221e-06	1.221
High	Sequest HT	Sequest HT (A5)	A	5	Unambiguous	NLEAGNVKETR	[A].nLEAGNVkETR.[A]	1	P35555	P35555	Fibrillin-1 OS=Homo sapiens OX=9606 GN=FBN1 PE=1 SV=4	P35555	Fibrillin-1 OS=Homo sapiens OX=9606 GN=FBN1 PE=1 SV=4	0	2	2	0.4239	0	1	1	1	739.4	739.4	1477.79	1477.79	3.35	0.00247	0/0	0	0	5389535	HCD	MS2	12.0798	21.122	50.355	19376	19376	19373	220621_E_205.raw	F6.5	NA	2114	3.68	1	FALSE	9.269e-06	4.997e-06	1.068
High	Sequest HT	Sequest HT (A5)	A	5	Selected	NLEAGNVKETR	[A].nLEAGNVkETR.[A]	1	P35555	P35555	Fibrillin-1 OS=Homo sapiens OX=9606 GN=FBN1 PE=1 SV=4	P35555	Fibrillin-1 OS=Homo sapiens OX=9606 GN=FBN1 PE=1 SV=4	0	2	2	0.3636	0	1	1	1	739.4	739.4	1477.79	1477.79	3.43	0.00254	0/0	0	0	1.87418e+06	HCD	MS2	16.4343	92.734	51.4234	18857	18857	18853	220621_E_305.raw	F7.5	NA	2116	4.07	1	FALSE	3.982e-05	0.0002319	0.639
High	Sequest HT	Sequest HT (A5)	A	5	Selected	NLEAGNVKETR	[A].nLEAGNVkETR.[A]	1	P35555	P35555	Fibrillin-1 OS=Homo sapiens OX=9606 GN=FBN1 PE=1 SV=4	P35555	Fibrillin-1 OS=Homo sapiens OX=9606 GN=FBN1 PE=1 SV=4	0	2	2	0.3831	0	1	1	1	739.4	739.4	1477.79	1477.79	3.21	0.00237	0/0	0	0	1737676	HCD	MS2	48.0176	50.07	51.8095	17161	17161	17150	220428_iNrich_HELA_MG132_Trypsin_05.raw	F12.5	NA	2128	3.55	1	FALSE	0.0003478	0.002785	0.377
High	Sequest HT	Sequest HT (A5)	A	5	Selected	EEKQRQELEKTRR	[R].eEkQRQELEkTRR.[K]	1	P35579	P35579	Myosin-9 OS=Homo sapiens OX=9606 GN=MYH9 PE=1 SV=4	P35579	Myosin-9 OS=Homo sapiens OX=9606 GN=MYH9 PE=1 SV=4	2	4	4	0.3321	0	1	1	1	506.035	506.035	2021.12	2021.12	-0.88	-0.00045	0/0	0	0	1828261	HCD	MS2	22.7705	28.731	50.4182	11111	11111	11108	200821_HELA_MGTG_iNrich_bRP_F03.raw	F1.3	NA	1758	2.77	1	FALSE	0.001023	0.009101	0.258
High	Sequest HT	Sequest HT (A5)	A	5	Selected	EEKQRQELEKTRR	[R].eEkQRQELEkTRR.[K]	1	P35579	P35579	Myosin-9 OS=Homo sapiens OX=9606 GN=MYH9 PE=1 SV=4	P35579	Myosin-9 OS=Homo sapiens OX=9606 GN=MYH9 PE=1 SV=4	2	3	3	0.2327	0	1	1	1	674.378	674.378	2021.12	2021.12	-0.21	-0.00014	0/0	0	0	1632797	HCD	MS2	0	120	50.508	11153	11153	11147	200821_HELA_MGTG_iNrich_bRP_F03.raw	F1.3	NA	1753	2.45	1	FALSE	9.516e-05	0.0005255	0.549
High	Sequest HT	Sequest HT (A5)	A	5	Unambiguous	DQASMPDNTAAQKVSHLLGINVTDFTR	[T].dQASmPDNTAAQkVSHLLGINVTDFTR.[G]	1	P35579	P35579	Myosin-9 OS=Homo sapiens OX=9606 GN=MYH9 PE=1 SV=4	P35579	Myosin-9 OS=Homo sapiens OX=9606 GN=MYH9 PE=1 SV=4	0	3	3	0.5822	0	1	1	1	1064.53	1064.53	3191.57	3191.6	-8.86	-0.00943	0/0	0	0	4478630	HCD	MS2	54.993	96.23	123.99	42337	42337	42331	200821_HELA_MGTG_iNrich_bRP_F07.raw	F1.7	NA	3352	3.71	1	FALSE	9.269e-06	8.613e-06	1.008
High	Sequest HT	Sequest HT (A5)	A	5	Unambiguous	EEKQRQELEKTRR	[R].eEkQRQELEkTRR.[K]	1	P35579	P35579	Myosin-9 OS=Homo sapiens OX=9606 GN=MYH9 PE=1 SV=4	P35579	Myosin-9 OS=Homo sapiens OX=9606 GN=MYH9 PE=1 SV=4	2	4	4	0.2718	0	1	1	1	506.035	506.035	2021.12	2021.12	-1.18	-0.0006	0/0	0	0	13460992	HCD	MS2	22.4308	7.841	54.9332	11770	11770	11767	200925_HELA_iNrich_bRP_F03.raw	F2.3	NA	1756	2.98	1	FALSE	0.00499	0.04613	0.08
High	Sequest HT	Sequest HT (A5)	A	5	Unambiguous	EQQVEEMKTQLEELEDELQATEDAKLR	[L].eQQVEEMkTQLEELEDELQATEDAkLR.[L]	1	P35579	P35579	Myosin-9 OS=Homo sapiens OX=9606 GN=MYH9 PE=1 SV=4	P35579	Myosin-9 OS=Homo sapiens OX=9606 GN=MYH9 PE=1 SV=4	0	4	4	0.2989	0	1	1	1	881.684	881.684	3523.71	3523.74	-7.7	-0.00679	0/0	0	0	967113	HCD	MS2	82.0232	120	116.664	38021	38021	38020	200925_HELA_iNrich_bRP_F06.raw	F2.6	NA	3323	3.48	1	FALSE	0.00834	0.07936	0.022
High	Sequest HT	Sequest HT (A5)	A	5	Unambiguous	EQQVEEMKTQLEELEDELQATEDAKLR	[L].eQQVEEMkTQLEELEDELQATEDAkLR.[L]	1	P35579	P35579	Myosin-9 OS=Homo sapiens OX=9606 GN=MYH9 PE=1 SV=4	P35579	Myosin-9 OS=Homo sapiens OX=9606 GN=MYH9 PE=1 SV=4	0	3	3	0.4589	0	1	1	1	1175.25	1175.25	3523.74	3523.74	-1.69	-0.00199	0/0	0	0	686588	HCD	MS2	11.7739	120	117.286	38277	38277	38267	200925_HELA_iNrich_bRP_F06.raw	F2.6	NoneMonoisotopic	3481	3.53	1	FALSE	1.762e-05	5.956e-05	0.795
High	Sequest HT	Sequest HT (A5)	A	5	Selected	EVNLQAMKAQFER	[L].eVNLQAMkAQFER.[D]	1	P35579	P35579	Myosin-9 OS=Homo sapiens OX=9606 GN=MYH9 PE=1 SV=4	P35579	Myosin-9 OS=Homo sapiens OX=9606 GN=MYH9 PE=1 SV=4	0	2	0	0.3312	0	1	1	1	905.484	905.484	1809.96	1809.95	2.86	0.00259	0/0	0	0	1.97006e+06	HCD	MS2	70.7107	78.022	103.741	47754	47754	47752	220621_E_106.raw	F5.6	NA	2442	3.11	1	FALSE	0.0008474	0.007517	0.278
[truncated: 534 more rows]
[truncated: 72 more columns]

## Sheet: Modified Peptides
Annotated Sequence	PSMs	Master Protein Accessions	Master Protein Descriptions	Protein Accessions	Protein Descriptions	Modifications.y	prot_pos_master	gene	prot_name	position	p5p1	reviewed	prot_pos_reposition
[truncated: 392 more rows]

## Sheet: Alphafold
uniprot_id	position_master	Sequence	prot_pos_master	position	mod_position	auth_comp_id	prediction_score	score_quality	prot_pos_reposition	sequence	pcc_check	rt_check	b_y_ttest_check	p2gv_check	p1r_check	score_sum	gene	loc_first
[truncated: 6,388 more rows]
