# Supplementary material for: Implementing N-terminomics and machine learning to probe in vivo Nt-arginylation
Source: Research Square preprint supplement (doi:10.21203/rs.3.rs-6500900/v1), 2025-05-12
Supplement: Supplementary file 4 [file 9f43228b8e4945ba98bb72ea.xlsx]

## Sheet: Column Headers
Column	Description
sequence	sequence of the peptide
charge	charge state of the peptide.
spec_idx	index
mods	modification names
mod_sites	modification sites (position)
nAA	peptide length
frag_start_idx	string for AlphaPeptDeep
frag_stop_idx	string for AlphaPeptDeep
nce	normalized collision energy
instrument	intrument name
PCC	Pearson's correlation coefficients after evalutating with MS2 prediction model.
COS	cosine similarity coefficients after evalutating with MS2 prediction model.
SA	spectral angle coefficients after evalutating with MS2 prediction model.
SPC	Spearman's correlation coefficients after evalutating with MS2 prediction model.
model	built: "from scratch" model. pretrained: pretrained model for tryptic peptides, finetuned: fine-tuned model using training set, finetunedwoarg: fine-tuned model using training set except Arg-starting peptides

## Sheet: Trypsin
sequence	charge	spec_idx	mods	mod_sites	nAA	frag_start_idx	frag_stop_idx	nce	instrument	PCC	COS	SA	SPC	model
REEARNPKR	3	20	Acetyl:2H(3)@Any N-term;Acetyl:2H(3)@K	0;8	9	0	8	27	QE	0.641506	0.735375	0.525988	0.77621	pretrained
RKEKSRDAAR	3	25	Acetyl:2H(3)@Any N-term;Acetyl:2H(3)@K;Acetyl:2H(3)@K	0;2;4	10	8	17	27	QE	0.824911	0.853147	0.650618	0.512227	pretrained
RTGAPAQADSR	2	36	Acetyl:2H(3)@Any N-term	0	11	17	27	27	QE	0.99134	0.991836	0.918594	0.833583	pretrained
RRPSKKKR	3	54	Acetyl:2H(3)@Any N-term;Acetyl:2H(3)@K;Acetyl:2H(3)@K;Acetyl:2H(3)@K	0;5;6;7	8	27	34	27	QE	0.773456	0.82601	0.618789	0.231801	pretrained
RSREQKAKQER	3	56	Acetyl:2H(3)@Any N-term;Acetyl:2H(3)@K;Acetyl:2H(3)@K	0;6;8	11	34	44	27	QE	0.593317	0.652551	0.452602	0.292589	pretrained
REVEKAKR	2	86	Acetyl:2H(3)@Any N-term;Acetyl:2H(3)@K;Acetyl:2H(3)@K	0;5;7	8	44	51	27	QE	0.846195	0.869262	0.670811	0.314997	pretrained
RNSETKVR	2	119	Acetyl:2H(3)@Any N-term;Acetyl:2H(3)@K	0;6	8	51	58	27	QE	0.94589	0.947138	0.79208	0.41434	pretrained
RGSQGDSKQQNGPPR	2	164	Acetyl:2H(3)@Any N-term;Acetyl:2H(3)@K	0;8	15	58	72	27	QE	0.97902	0.980519	0.874135	0.421326	pretrained
RGSQGDSKQQNGPPR	3	168	Acetyl:2H(3)@Any N-term;Acetyl:2H(3)@K	0;8	15	72	86	27	QE	0.96054	0.967628	0.837573	0.706801	pretrained
RQQQAATSESSQSEASVRR	3	181	Acetyl:2H(3)@Any N-term	0	19	86	104	27	QE	0.771631	0.808493	0.599432	0.552753	pretrained
RGSQGDSKQQNGPPR	2	184	Acetyl:2H(3)@Any N-term;Acetyl:2H(3)@K	0;8	15	104	118	27	QE	0.987224	0.988219	0.902184	0.612679	pretrained
RGSQGDSKQQNGPPR	3	187	Acetyl:2H(3)@Any N-term;Acetyl:2H(3)@K	0;8	15	118	132	27	QE	0.969459	0.974655	0.856364	0.842823	pretrained
RGLDDDRGPR	3	189	Acetyl:2H(3)@Any N-term	0	10	132	141	27	QE	0.793182	0.833824	0.627706	0.586358	pretrained
RLRQEKEDR	3	190	Acetyl:2H(3)@Any N-term;Acetyl:2H(3)@K	0;6	9	141	149	27	QE	0.913023	0.928403	0.757636	0.485887	pretrained
RLNPNASR	2	208	Acetyl:2H(3)@Any N-term	0	8	149	156	27	QE	0.87643	0.899297	0.711843	0.344828	pretrained
RTGPPMGSR	2	254	Acetyl:2H(3)@Any N-term	0	9	156	164	27	QE	0.8597	0.89634	0.707568	0.460777	pretrained
RALDDTARER	3	262	Acetyl:2H(3)@Any N-term	0	10	164	173	27	QE	0.920951	0.935295	0.769731	0.759202	pretrained
RTGPPMGSR	2	274	Acetyl:2H(3)@Any N-term	0	9	173	181	27	QE	0.840637	0.871979	0.674327	0.304252	pretrained
RDGGAAAAGPRPEQEPR	3	310	Acetyl:2H(3)@Any N-term	0	17	181	197	27	QE	0.979529	0.9808	0.875047	0.65103	pretrained
RDGPGLER	2	333	Acetyl:2H(3)@Any N-term	0	8	197	204	27	QE	0.961416	0.967074	0.836181	0.82567	pretrained
RKKIDRNPR	3	338	Acetyl:2H(3)@Any N-term;Acetyl:2H(3)@K;Acetyl:2H(3)@K	0;2;3	9	204	212	27	QE	0.680016	0.747016	0.537029	0.432368	pretrained
RAGAACTLR	2	340	Acetyl:2H(3)@Any N-term;Carbamidomethyl@C	0;6	9	212	220	27	QE	0.95363	0.962614	0.825372	0.757148	pretrained
RCDELTR	2	343	Acetyl:2H(3)@Any N-term;Carbamidomethyl@C	0;2	7	220	226	27	QE	0.90621	0.91565	0.736647	0.864348	pretrained
RDQDNMQAELNR	2	350	Acetyl:2H(3)@Any N-term;Oxidation@M	0;6	12	226	237	27	QE	0.960397	0.964498	0.829856	0.324736	pretrained
RKPSSEEGKR	2	355	Acetyl:2H(3)@Any N-term;Acetyl:2H(3)@K;Acetyl:2H(3)@K	0;2;9	10	237	246	27	QE	0.894436	0.914665	0.735091	0.878121	pretrained
RAKKVASR	2	358	Acetyl:2H(3)@Any N-term;Acetyl:2H(3)@K;Acetyl:2H(3)@K	0;3;4	8	246	253	27	QE	0.935795	0.940292	0.778896	0.510947	pretrained
RRPDAPAPDPER	3	359	Acetyl:2H(3)@Any N-term	0	12	253	264	27	QE	0.940318	0.948104	0.794004	0.687808	pretrained
RLEAEQAR	2	367	Acetyl:2H(3)@Any N-term	0	8	264	271	27	QE	0.915991	0.941494	0.781156	0.749042	pretrained
RALDDTAR	2	377	Acetyl:2H(3)@Any N-term	0	8	271	278	27	QE	0.963185	0.971489	0.847617	0.909141	pretrained
RGPEEDRFSR	3	381	Acetyl:2H(3)@Any N-term	0	10	278	287	27	QE	0.813012	0.866851	0.667719	0.867954	pretrained
RSAQDGPAPAEKR	2	409	Acetyl:2H(3)@Any N-term;Acetyl:2H(3)@K	0;12	13	287	299	27	QE	0.981378	0.983418	0.883906	0.703105	pretrained
RGPEEDRFSR	3	421	Acetyl:2H(3)@Any N-term	0	10	299	308	27	QE	0.772698	0.815797	0.607403	0.736422	pretrained
RQEELKR	2	429	Acetyl:2H(3)@Any N-term;Acetyl:2H(3)@K	0;6	7	308	314	27	QE	0.94305	0.953646	0.805406	0.796522	pretrained
RAELEASR	2	431	Acetyl:2H(3)@Any N-term	0	8	314	321	27	QE	0.510439	0.630336	0.434166	0.522441	pretrained
RSVSDNDIR	2	433	Acetyl:2H(3)@Any N-term	0	9	321	329	27	QE	0.97779	0.979904	0.872156	0.594758	pretrained
RSVSDNDIR	1	439	Acetyl:2H(3)@Any N-term	0	9	329	337	27	QE	0.718942	0.7546	0.544338	0.667889	pretrained
RVPEEASTNR	2	452	Acetyl:2H(3)@Any N-term	0	10	337	346	27	QE	0.891403	0.913794	0.733723	0.683269	pretrained
RQQEEMMR	2	461	Acetyl:2H(3)@Any N-term	0	8	346	353	27	QE	0.980982	0.986719	0.89613	0.932676	pretrained
RSVSDNDIR	2	474	Acetyl:2H(3)@Any N-term	0	9	353	361	27	QE	0.962149	0.965305	0.831813	0.43695	pretrained
RQPKYPR	2	477	Acetyl:2H(3)@Any N-term;Acetyl:2H(3)@K	0;4	7	361	367	27	QE	0.893064	0.925307	0.752386	0.757391	pretrained
RREGKTDYYAR	3	490	Acetyl:2H(3)@Any N-term;Acetyl:2H(3)@K	0;5	11	367	377	27	QE	0.798798	0.833407	0.627226	0.519231	pretrained
RHTAGKAIVDSR	3	510	Acetyl:2H(3)@Any N-term;Acetyl:2H(3)@K	0;6	12	377	388	27	QE	0.88669	0.90557	0.721112	0.67914	pretrained
RKQEEALR	2	574	Acetyl:2H(3)@Any N-term;Acetyl:2H(3)@K	0;2	8	388	395	27	QE	0.979246	0.982816	0.881808	0.755063	pretrained
RPQPTPTAVR	2	575	Acetyl:2H(3)@Any N-term	0	10	395	404	27	QE	0.814397	0.841938	0.637171	0.381853	pretrained
RAKVYGR	2	579	Acetyl:2H(3)@Any N-term;Acetyl:2H(3)@K	0;3	7	404	410	27	QE	0.905874	0.933841	0.767129	0.937391	pretrained
RPGEKTYTQR	2	617	Acetyl:2H(3)@Any N-term;Acetyl:2H(3)@K	0;5	10	410	419	27	QE	0.726905	0.776725	0.566241	0.559331	pretrained
RYRESKKIDR	3	669	Acetyl:2H(3)@Any N-term;Acetyl:2H(3)@K;Acetyl:2H(3)@K	0;6;7	10	419	428	27	QE	0.948261	0.952539	0.803076	0.486744	pretrained
RQKKTKKQKR	3	757	Acetyl:2H(3)@Any N-term;Acetyl:2H(3)@K;Acetyl:2H(3)@K;Acetyl:2H(3)@K;Acetyl:2H(3)@K;Acetyl:2H(3)@K	0;3;4;6;7;9	10	428	437	27	QE	0.953855	0.963848	0.828296	0.602574	pretrained
RQKKTKKQKR	2	764	Acetyl:2H(3)@Any N-term;Acetyl:2H(3)@K;Acetyl:2H(3)@K;Acetyl:2H(3)@K;Acetyl:2H(3)@K;Acetyl:2H(3)@K	0;3;4;6;7;9	10	437	446	27	QE	0.676395	0.689682	0.484499	0.0882883	pretrained
REEKQRQELEKTR	3	766	Acetyl:2H(3)@Any N-term;Acetyl:2H(3)@K;Acetyl:2H(3)@K	0;4;11	13	446	458	27	QE	0.648847	0.717462	0.509393	0.176997	pretrained
RKPNAGGSPAPVR	2	827	Acetyl:2H(3)@Any N-term;Acetyl:2H(3)@K	0;2	13	458	470	27	QE	0.815132	0.836962	0.631341	0.854592	pretrained
RDLEGSDIDTRR	3	841	Acetyl:2H(3)@Any N-term	0	12	470	481	27	QE	0.90158	0.914609	0.735003	0.771741	pretrained
RGERPDYKGEEELRR	4	963	Acetyl:2H(3)@Any N-term;Acetyl:2H(3)@K	0;8	15	481	495	27	QE	0.830938	0.85428	0.652003	0.62676	pretrained
RQEKMADPESNQEAVNSSAAR	3	967	Acetyl:2H(3)@Any N-term;Acetyl:2H(3)@K;Oxidation@M	0;4;5	21	495	515	27	QE	0.955212	0.960888	0.821361	0.621964	pretrained
RLDKVR	2	976	Acetyl:2H(3)@Any N-term;Acetyl:2H(3)@K	0;4	6	515	520	27	QE	0.773735	0.827093	0.620015	0.462406	pretrained
RKMADLHAVPR	3	1002	Acetyl:2H(3)@Any N-term;Acetyl:2H(3)@K;Oxidation@M	0;2;3	11	520	530	27	QE	0.880297	0.89968	0.7124	0.786961	pretrained
RFQDAVR	2	1009	Acetyl:2H(3)@Any N-term	0	7	530	536	27	QE	0.962286	0.969623	0.842684	0.636087	pretrained
RSCKTAPASSSKSQTEVPKRGGR	3	1014	Acetyl:2H(3)@Any N-term;Carbamidomethyl@C;Acetyl:2H(3)@K;Acetyl:2H(3)@K;Acetyl:2H(3)@K	0;3;4;12;19	23	536	558	27	QE	0.957359	0.959222	0.81757	0.613601	pretrained
RSKSDGEAKPEPSPSPR	3	1071	Acetyl:2H(3)@Any N-term;Acetyl:2H(3)@K;Acetyl:2H(3)@K	0;3;9	17	558	574	27	QE	0.950392	0.953839	0.805813	0.696177	pretrained
RSKSDGEAKPEPSPSPR	2	1073	Acetyl:2H(3)@Any N-term;Acetyl:2H(3)@K;Acetyl:2H(3)@K	0;3;9	17	574	590	27	QE	0.954198	0.95855	0.816063	0.872962	pretrained
RDALLSR	2	1075	Acetyl:2H(3)@Any N-term	0	7	590	596	27	QE	0.755937	0.81995	0.611998	0.79	pretrained
RRANENSNIQVLSER	3	1076	Acetyl:2H(3)@Any N-term	0	15	596	610	27	QE	0.938915	0.949909	0.797649	0.595557	pretrained
RQSIAKEKEER	2	1117	Acetyl:2H(3)@Any N-term;Acetyl:2H(3)@K;Acetyl:2H(3)@K	0;6;8	11	610	620	27	QE	0.840734	0.867657	0.668751	0.431238	pretrained
RIRNEKGEIEQER	3	1155	Acetyl:2H(3)@Any N-term;Acetyl:2H(3)@K	0;6	13	620	632	27	QE	0.81798	0.836973	0.631354	0.0838037	pretrained
RDQDNMQAELNR	2	1198	Acetyl:2H(3)@Any N-term	0	12	632	643	27	QE	0.961654	0.970974	0.846239	0.822762	pretrained
RKEEAKESPSAAGPEDKSQSKRR	3	1222	Acetyl:2H(3)@Any N-term;Acetyl:2H(3)@K;Acetyl:2H(3)@K;Acetyl:2H(3)@K;Acetyl:2H(3)@K	0;2;6;17;21	23	643	665	27	QE	0.912273	0.917761	0.740011	0.421392	pretrained
RVEILNEHR	3	1230	Acetyl:2H(3)@Any N-term	0	9	665	673	27	QE	0.975556	0.979965	0.87235	0.792155	pretrained
RENQVLSVR	2	1242	Acetyl:2H(3)@Any N-term	0	9	673	681	27	QE	0.938302	0.951479	0.800871	0.563416	pretrained
RMGESDDSILR	2	1245	Acetyl:2H(3)@Any N-term;Oxidation@M	0;2	11	681	691	27	QE	0.984216	0.985607	0.891858	0.714634	pretrained
RDFAPPGQQKR	2	1322	Acetyl:2H(3)@Any N-term;Acetyl:2H(3)@K	0;10	11	691	701	27	QE	0.915025	0.93183	0.763576	0.733865	pretrained
RDFAPPGQQKR	3	1329	Acetyl:2H(3)@Any N-term;Acetyl:2H(3)@K	0;10	11	701	711	27	QE	0.942508	0.94593	0.789694	0.664446	pretrained
RRKEDEVEEWQHR	4	1343	Acetyl:2H(3)@Any N-term;Acetyl:2H(3)@K	0;3	13	711	723	27	QE	0.73271	0.779607	0.569163	0.746092	pretrained
RRKEDEVEEWQHR	3	1353	Acetyl:2H(3)@Any N-term;Acetyl:2H(3)@K	0;3	13	723	735	27	QE	0.881605	0.902187	0.716079	0.708641	pretrained
RKKEITVR	2	1367	Acetyl:2H(3)@Any N-term;Acetyl:2H(3)@K;Acetyl:2H(3)@K	0;2;3	8	735	742	27	QE	0.957897	0.964042	0.828761	0.380405	pretrained
RKSLLTR	2	1385	Acetyl:2H(3)@Any N-term;Acetyl:2H(3)@K	0;2	7	742	748	27	QE	0.947173	0.957256	0.813195	0.816522	pretrained
RELQSAVPR	2	1393	Acetyl:2H(3)@Any N-term	0	9	748	756	27	QE	0.901521	0.927153	0.755503	0.592192	pretrained
RCESKKFGGPGAR	3	1404	Acetyl:2H(3)@Any N-term;Carbamidomethyl@C;Acetyl:2H(3)@K;Acetyl:2H(3)@K	0;2;5;6	13	756	768	27	QE	0.949862	0.955143	0.808598	0.750923	pretrained
RCESKKFGGPGAR	2	1414	Acetyl:2H(3)@Any N-term;Carbamidomethyl@C;Acetyl:2H(3)@K;Acetyl:2H(3)@K	0;2;5;6	13	768	780	27	QE	0.921304	0.939585	0.777577	0.642423	pretrained
RDFAPPGQQKR	2	1417	Acetyl:2H(3)@Any N-term;Acetyl:2H(3)@K	0;10	11	780	790	27	QE	0.519522	0.592648	0.403835	0.592402	pretrained
RVAAMSVAAR	2	1425	Acetyl:2H(3)@Any N-term	0	10	790	799	27	QE	0.943743	0.951323	0.800549	0.717632	pretrained
RQEKMADPESNQEAVNSSAAR	3	1446	Acetyl:2H(3)@Any N-term;Acetyl:2H(3)@K	0;4	21	799	819	27	QE	0.964365	0.968851	0.840687	0.78835	pretrained
RCESKKFGGPGAR	3	1452	Acetyl:2H(3)@Any N-term;Carbamidomethyl@C;Acetyl:2H(3)@K;Acetyl:2H(3)@K	0;2;5;6	13	819	831	27	QE	0.976849	0.979403	0.870566	0.826205	pretrained
RCESKKFGGPGAR	2	1457	Acetyl:2H(3)@Any N-term;Carbamidomethyl@C;Acetyl:2H(3)@K;Acetyl:2H(3)@K	0;2;5;6	13	831	843	27	QE	0.824063	0.837296	0.631729	0.295538	pretrained
RLEHSKNVNTEKLR	3	1492	Acetyl:2H(3)@Any N-term;Acetyl:2H(3)@K;Acetyl:2H(3)@K	0;6;12	14	843	856	27	QE	0.812157	0.845924	0.641901	0.55225	pretrained
RAEIKQGIR	2	1509	Acetyl:2H(3)@Any N-term;Acetyl:2H(3)@K	0;5	9	856	864	27	QE	0.934592	0.948235	0.794267	0.55022	pretrained
RLQGQLEQGDDTAAER	3	1546	Acetyl:2H(3)@Any N-term	0	16	864	879	27	QE	0.987047	0.989481	0.907581	0.681689	pretrained
RLQGQLEQGDDTAAER	2	1555	Acetyl:2H(3)@Any N-term	0	16	879	894	27	QE	0.975426	0.976973	0.863117	0.840956	pretrained
RKSALALR	2	1607	Acetyl:2H(3)@Any N-term;Acetyl:2H(3)@K	0;2	8	894	901	27	QE	0.95652	0.963633	0.827783	0.624247	pretrained
RGGPISFSSSR	2	1621	Acetyl:2H(3)@Any N-term	0	11	901	911	27	QE	0.299417	0.462953	0.30642	0.322889	pretrained
RKKQKLAKER	2	1638	Acetyl:2H(3)@Any N-term;Acetyl:2H(3)@K;Acetyl:2H(3)@K;Acetyl:2H(3)@K;Acetyl:2H(3)@K	0;2;3;5;8	10	911	920	27	QE	0.910215	0.916249	0.737597	0.324582	pretrained
RKKQKLAKER	3	1646	Acetyl:2H(3)@Any N-term;Acetyl:2H(3)@K;Acetyl:2H(3)@K;Acetyl:2H(3)@K;Acetyl:2H(3)@K	0;2;3;5;8	10	920	929	27	QE	0.935665	0.943148	0.784301	0.644659	pretrained
RKKQKLAKER	2	1692	Acetyl:2H(3)@Any N-term;Acetyl:2H(3)@K;Acetyl:2H(3)@K;Acetyl:2H(3)@K;Acetyl:2H(3)@K	0;2;3;5;8	10	929	938	27	QE	0.921801	0.927088	0.755393	0.111712	pretrained
RVAAMSVAKR	2	1698	Acetyl:2H(3)@Any N-term;Acetyl:2H(3)@K	0;9	10	938	947	27	QE	0.941201	0.949684	0.797191	0.731532	pretrained
RLNKHEENLKTKKQQR	3	1701	Acetyl:2H(3)@Any N-term;Acetyl:2H(3)@K;Acetyl:2H(3)@K;Acetyl:2H(3)@K;Acetyl:2H(3)@K	0;4;10;12;13	16	947	962	27	QE	0.769384	0.802119	0.592589	0.310086	pretrained
RAIYQATYR	2	1711	Acetyl:2H(3)@Any N-term	0	9	962	970	27	QE	0.939259	0.939693	0.777779	0.549304	pretrained
RLQQAVLSR	2	1768	Acetyl:2H(3)@Any N-term	0	9	970	978	27	QE	0.904436	0.928596	0.757968	0.632331	pretrained
RGLGAPLTEDQQNR	2	1826	Acetyl:2H(3)@Any N-term	0	14	978	991	27	QE	0.930769	0.939414	0.777259	0.448604	pretrained
RLLAEKER	2	1860	Acetyl:2H(3)@Any N-term;Acetyl:2H(3)@K	0;6	8	991	998	27	QE	0.919661	0.942395	0.782864	0.761357	pretrained
RLLAEKER	2	1909	Acetyl:2H(3)@Any N-term;Acetyl:2H(3)@K	0;6	8	998	1005	27	QE	0.933858	0.939495	0.777409	0.629447	pretrained
RLMAEDEEGYR	2	1930	Acetyl:2H(3)@Any N-term	0	11	1005	1015	27	QE	0.773482	0.813511	0.604893	0.777298	pretrained
RQYEEKNKEFER	3	2016	Acetyl:2H(3)@Any N-term;Acetyl:2H(3)@K;Acetyl:2H(3)@K	0;6;8	12	1015	1026	27	QE	0.946541	0.959267	0.817671	0.645525	pretrained
RLASTSDIEEKENR	3	2043	Acetyl:2H(3)@Any N-term;Acetyl:2H(3)@K	0;11	14	1026	1039	27	QE	0.98154	0.983864	0.885481	0.674123	pretrained
RIQEKKDEDIAR	2	2044	Acetyl:2H(3)@Any N-term;Acetyl:2H(3)@K;Acetyl:2H(3)@K	0;5;6	12	1039	1050	27	QE	0.939179	0.946935	0.791677	0.501903	pretrained
RLKTTPLPR	2	2054	Acetyl:2H(3)@Any N-term;Acetyl:2H(3)@K	0;3	9	1050	1058	27	QE	0.821173	0.847363	0.643623	0.83816	pretrained
RLPNLPSQSR	2	2064	Acetyl:2H(3)@Any N-term	0	10	1058	1067	27	QE	0.858263	0.891791	0.701102	0.579151	pretrained
RGFSTTSAITPAAGR	2	2095	Acetyl:2H(3)@Any N-term	0	15	1067	1081	27	QE	0.823951	0.851065	0.648085	0.450752	pretrained
RLEELRNQELQKR	3	2116	Acetyl:2H(3)@Any N-term;Acetyl:2H(3)@K	0;12	13	1081	1093	27	QE	0.767158	0.809594	0.600625	0.874674	pretrained
RHEAAVPPLAIPSARPEKR	4	2175	Acetyl:2H(3)@Any N-term;Acetyl:2H(3)@K	0;18	19	1093	1111	27	QE	0.898317	0.909852	0.72761	0.834346	pretrained
RVLVDVER	2	2218	Acetyl:2H(3)@Any N-term	0	8	1111	1118	27	QE	0.984135	0.986847	0.896633	0.853585	pretrained
RQPLSKLPR	2	2232	Acetyl:2H(3)@Any N-term;Acetyl:2H(3)@K	0;6	9	1118	1126	27	QE	0.851469	0.886378	0.693573	0.587427	pretrained
RLDLDACKAR	2	2254	Acetyl:2H(3)@Any N-term;Carbamidomethyl@C;Acetyl:2H(3)@K	0;7;8	10	1126	1135	27	QE	0.942159	0.955386	0.809122	0.886358	pretrained
RAMADPEVQQIMSDPAMR	3	2284	Acetyl:2H(3)@Any N-term;Oxidation@M;Oxidation@M	0;3;12	18	1135	1152	27	QE	0.965013	0.967883	0.838217	0.403138	pretrained
RVELSGPKAAEPVSR	2	2310	Acetyl:2H(3)@Any N-term;Acetyl:2H(3)@K	0;8	15	1152	1166	27	QE	0.943301	0.945763	0.789367	0.655195	pretrained
RVELSGPKAAEPVSR	3	2311	Acetyl:2H(3)@Any N-term;Acetyl:2H(3)@K	0;8	15	1166	1180	27	QE	0.943846	0.950129	0.798097	0.581681	pretrained
RYQKSTELLIR	3	2331	Acetyl:2H(3)@Any N-term;Acetyl:2H(3)@K	0;4	11	1180	1190	27	QE	0.853615	0.878742	0.683232	0.142777	pretrained
RDFTPAELR	2	2392	Acetyl:2H(3)@Any N-term	0	9	1190	1198	27	QE	0.971697	0.976669	0.862212	0.853006	pretrained
RSIKLDGKGEPKGAKR	3	2398	Acetyl:2H(3)@Any N-term;Acetyl:2H(3)@K;Acetyl:2H(3)@K;Acetyl:2H(3)@K;Acetyl:2H(3)@K	0;4;8;12;15	16	1198	1213	27	QE	0.948129	0.954548	0.807323	0.784107	pretrained
RAMADPEVQQIMSDPAMR	3	2415	Acetyl:2H(3)@Any N-term;Oxidation@M;Oxidation@M	0;12;17	18	1213	1230	27	QE	0.979002	0.980735	0.874835	0.419132	pretrained
REVKKEEGEAFAR	2	2434	Acetyl:2H(3)@Any N-term;Acetyl:2H(3)@K;Acetyl:2H(3)@K	0;4;5	13	1230	1242	27	QE	0.843406	0.874211	0.677242	0.56193	pretrained
REVKKEEGEAFAR	3	2436	Acetyl:2H(3)@Any N-term;Acetyl:2H(3)@K;Acetyl:2H(3)@K	0;4;5	13	1242	1254	27	QE	0.924336	0.938795	0.776112	0.709672	pretrained
RFTEELPDER	2	2451	Acetyl:2H(3)@Any N-term	0	10	1254	1263	27	QE	0.977281	0.979756	0.871685	0.989447	pretrained
RRVGLKAPGIIPR	3	2459	Acetyl:2H(3)@Any N-term;Acetyl:2H(3)@K	0;6	13	1263	1275	27	QE	0.677349	0.706973	0.499879	0.259173	pretrained
RAMADPEVQQIMSDPAMR	3	2462	Acetyl:2H(3)@Any N-term;Oxidation@M;Oxidation@M	0;12;17	18	1275	1292	27	QE	0.97672	0.978976	0.869228	0.575677	pretrained
RYQKSTELLIR	3	2472	Acetyl:2H(3)@Any N-term;Acetyl:2H(3)@K	0;4	11	1292	1302	27	QE	0.947846	0.959741	0.818743	0.858537	pretrained
RYQKSTELLIR	2	2493	Acetyl:2H(3)@Any N-term;Acetyl:2H(3)@K	0;4	11	1302	1312	27	QE	0.968342	0.970604	0.845258	0.469043	pretrained
RKVEEAFNCR	2	2498	Acetyl:2H(3)@Any N-term;Acetyl:2H(3)@K;Carbamidomethyl@C	0;2;9	10	1312	1321	27	QE	0.894305	0.921654	0.746323	0.764093	pretrained
RLLQQEEKVKR	3	2521	Acetyl:2H(3)@Any N-term;Acetyl:2H(3)@K;Acetyl:2H(3)@K	0;8;10	11	1321	1331	27	QE	0.957074	0.968499	0.839785	0.93349	pretrained
RYQKSTELLIR	3	2528	Acetyl:2H(3)@Any N-term;Acetyl:2H(3)@K	0;4	11	1331	1341	27	QE	0.95416	0.9646	0.830102	0.803752	pretrained
RLLQQEEKVKR	2	2529	Acetyl:2H(3)@Any N-term;Acetyl:2H(3)@K;Acetyl:2H(3)@K	0;8;10	11	1341	1351	27	QE	0.884833	0.894961	0.705593	0.217261	pretrained
RIVEQDTMPPKGVR	2	2558	Acetyl:2H(3)@Any N-term;Acetyl:2H(3)@K	0;11	14	1351	1364	27	QE	0.93486	0.943661	0.785286	0.468881	pretrained
RQQEGFKGTFPDAR	3	2585	Acetyl:2H(3)@Any N-term;Acetyl:2H(3)@K	0;7	14	1364	1377	27	QE	0.904933	0.918293	0.740865	0.712243	pretrained
RQQEGFKGTFPDAR	2	2586	Acetyl:2H(3)@Any N-term;Acetyl:2H(3)@K	0;7	14	1377	1390	27	QE	0.992372	0.992839	0.923769	0.401947	pretrained
RLTEEFQNVR	2	2618	Acetyl:2H(3)@Any N-term	0	10	1390	1399	27	QE	0.903247	0.913027	0.732524	0.666667	pretrained
RIVEQDTMPPKGVR	3	2625	Acetyl:2H(3)@Any N-term;Acetyl:2H(3)@K	0;11	14	1399	1412	27	QE	0.9159	0.926563	0.754502	0.778281	pretrained
RLAAEATEWQR	2	2670	Acetyl:2H(3)@Any N-term	0	11	1412	1422	27	QE	0.934403	0.949223	0.796257	0.74334	pretrained
RLEAVLASR	2	2770	Acetyl:2H(3)@Any N-term	0	9	1422	1430	27	QE	0.906621	0.917434	0.739487	0.614736	pretrained
RLLEGEESR	2	2804	Acetyl:2H(3)@Any N-term	0	9	1430	1438	27	QE	0.21021	0.372441	0.242958	0.293622	pretrained
RIVDGKVVSETNDTKVLRH	3	2827	Acetyl:2H(3)@Any N-term;Acetyl:2H(3)@K;Acetyl:2H(3)@K	0;6;15	19	1438	1456	27	QE	0.787686	0.837958	0.632502	0.527719	pretrained
RAMADPEVQQIMSDPAMR	3	2899	Acetyl:2H(3)@Any N-term;Oxidation@M;Oxidation@M	0;3;12	18	1456	1473	27	QE	0.740447	0.772574	0.562062	0.208306	pretrained
RLEAAYLDLQR	3	2923	Acetyl:2H(3)@Any N-term	0	11	1473	1483	27	QE	0.713436	0.756664	0.546344	0.313415	pretrained
RIVDGKVVSETNDTKVLRH	4	2928	Acetyl:2H(3)@Any N-term;Acetyl:2H(3)@K;Acetyl:2H(3)@K	0;6;15	19	1483	1501	27	QE	0.690053	0.74816	0.538125	0.613319	pretrained
RIVDGKVVSETNDTKVLRH	3	2931	Acetyl:2H(3)@Any N-term;Acetyl:2H(3)@K;Acetyl:2H(3)@K	0;6;15	19	1501	1519	27	QE	0.822444	0.865263	0.665697	0.670333	pretrained
RLFEGNALLRR	3	2939	Acetyl:2H(3)@Any N-term	0	11	1519	1529	27	QE	0.881511	0.908171	0.725042	0.516792	pretrained
RAMADPEVQQIMSDPAMR	3	2973	Acetyl:2H(3)@Any N-term;Oxidation@M	0;12	18	1529	1546	27	QE	0.959469	0.964006	0.828675	0.863687	pretrained
RYQKSTELLIR	2	3074	Acetyl:2H(3)@Any N-term;Acetyl:2H(3)@K	0;4	11	1546	1556	27	QE	0.981533	0.983312	0.883531	0.727674	pretrained
RIVDGKVVSETNDTKVLRH	3	3202	Acetyl:2H(3)@Any N-term;Acetyl:2H(3)@K;Acetyl:2H(3)@K	0;6;15	19	1556	1574	27	QE	0.80638	0.852357	0.649655	0.701862	pretrained
RQLLATLR	2	3255	Acetyl:2H(3)@Any N-term	0	8	1574	1581	27	QE	0.968328	0.968012	0.838544	0.689655	pretrained
RNFAELKIKR	2	3344	Acetyl:2H(3)@Any N-term;Acetyl:2H(3)@K;Acetyl:2H(3)@K	0;7;9	10	1581	1590	27	QE	0.905078	0.923646	0.749612	0.888932	pretrained
RNFAELKIKR	3	3353	Acetyl:2H(3)@Any N-term;Acetyl:2H(3)@K;Acetyl:2H(3)@K	0;7;9	10	1590	1599	27	QE	0.937634	0.952773	0.803567	0.940927	pretrained
RNFAELKIKR	2	3361	Acetyl:2H(3)@Any N-term;Acetyl:2H(3)@K;Acetyl:2H(3)@K	0;7;9	10	1599	1608	27	QE	0.834045	0.860827	0.660106	0.330631	pretrained
RLESKIREHLEKKGPQVR	4	3370	Acetyl:2H(3)@Any N-term;Acetyl:2H(3)@K;Acetyl:2H(3)@K;Acetyl:2H(3)@K	0;5;12;13	18	1608	1625	27	QE	0.857953	0.86197	0.661539	0.378307	pretrained
RLESKIREHLEKKGPQVR	4	3414	Acetyl:2H(3)@Any N-term;Acetyl:2H(3)@K;Acetyl:2H(3)@K;Acetyl:2H(3)@K	0;5;12;13	18	1625	1642	27	QE	0.878673	0.879301	0.68398	0.390255	pretrained
RLLEGEDAHLTQYKKEPVTTR	3	3427	Acetyl:2H(3)@Any N-term;Acetyl:2H(3)@K;Acetyl:2H(3)@K	0;14;15	21	1642	1662	27	QE	0.831207	0.860853	0.660139	0.627672	pretrained
RAMADPEVQQIMSDPAMR	3	3431	Acetyl:2H(3)@Any N-term;Oxidation@M	0;3	18	1662	1679	27	QE	0.956119	0.96112	0.821895	0.758236	pretrained
RIVDGKVVSETNDTKVLR	3	3460	Acetyl:2H(3)@Any N-term;Acetyl:2H(3)@K;Acetyl:2H(3)@K	0;6;15	18	1679	1696	27	QE	0.879893	0.902416	0.716417	0.706894	pretrained
RIVDGKVVSETNDTKVLR	2	3465	Acetyl:2H(3)@Any N-term;Acetyl:2H(3)@K;Acetyl:2H(3)@K	0;6;15	18	1696	1713	27	QE	0.984226	0.985507	0.891481	0.526606	pretrained
RCLYASVLTAQPR	3	3475	Acetyl:2H(3)@Any N-term;Carbamidomethyl@C	0;2	13	1713	1725	27	QE	0.98982	0.991596	0.917408	0.893183	pretrained
RAMADPEVQQIMSDPAMR	3	3506	Acetyl:2H(3)@Any N-term;Oxidation@M	0;17	18	1725	1742	27	QE	0.976361	0.979135	0.869725	0.781101	pretrained
RGLMSQLEEKER	2	3591	Acetyl:2H(3)@Any N-term;Acetyl:2H(3)@K	0;10	12	1742	1753	27	QE	0.910807	0.921232	0.745631	0.478929	pretrained
RGLMSQLEEKER	3	3601	Acetyl:2H(3)@Any N-term;Acetyl:2H(3)@K	0;10	12	1753	1764	27	QE	0.789706	0.831254	0.624754	0.434179	pretrained
RLSDKGLKAELMER	3	3662	Acetyl:2H(3)@Any N-term;Acetyl:2H(3)@K;Acetyl:2H(3)@K;Oxidation@M	0;5;8;12	14	1764	1777	27	QE	0.921825	0.934027	0.767462	0.452275	pretrained
RLEAAYLDLQR	2	3666	Acetyl:2H(3)@Any N-term	0	11	1777	1787	27	QE	0.966728	0.972329	0.84989	0.735835	pretrained
RSPSKPLPEVTDEYKNDVKNR	3	3711	Acetyl:2H(3)@Any N-term;Acetyl:2H(3)@K;Acetyl:2H(3)@K;Acetyl:2H(3)@K	0;5;15;19	21	1787	1807	27	QE	0.960961	0.966297	0.83425	0.430825	pretrained
RAMADPEVQQIMSDPAMR	3	4027	Acetyl:2H(3)@Any N-term	0	18	1807	1824	27	QE	0.957542	0.962525	0.825164	0.655667	pretrained
RAMADPEVQQIMSDPAMR	2	4036	Acetyl:2H(3)@Any N-term	0	18	1824	1841	27	QE	0.958532	0.96086	0.821298	0.566248	pretrained
RVPFSLLR	2	4039	Acetyl:2H(3)@Any N-term	0	8	1841	1848	27	QE	0.924637	0.94215	0.782398	0.817734	pretrained
RVLKKNPLKNLR	2	4109	Acetyl:2H(3)@Any N-term;Acetyl:2H(3)@K;Acetyl:2H(3)@K;Acetyl:2H(3)@K	0;4;5;9	12	1848	1859	27	QE	0.893078	0.910812	0.729087	0.355321	pretrained
RVLKKNPLKNLR	3	4115	Acetyl:2H(3)@Any N-term;Acetyl:2H(3)@K;Acetyl:2H(3)@K;Acetyl:2H(3)@K	0;4;5;9	12	1859	1870	27	QE	0.917544	0.932208	0.764241	0.44327	pretrained
RVKTNVPVKLFAR	2	4116	Acetyl:2H(3)@Any N-term;Acetyl:2H(3)@K;Acetyl:2H(3)@K	0;3;9	13	1870	1882	27	QE	0.95095	0.958187	0.815254	0.691924	pretrained
RAMELLKVSKDKR	3	4194	Acetyl:2H(3)@Any N-term;Acetyl:2H(3)@K;Acetyl:2H(3)@K;Acetyl:2H(3)@K	0;7;10;12	13	1882	1894	27	QE	0.87189	0.894667	0.705175	0.661908	pretrained
RELQALGFQPGPITDTTR	3	4362	Acetyl:2H(3)@Any N-term	0	18	1894	1911	27	QE	0.979472	0.980589	0.87436	0.692178	pretrained
RQELEQVLGIR	2	4456	Acetyl:2H(3)@Any N-term	0	11	1911	1921	27	QE	0.93735	0.944169	0.786265	0.606004	pretrained
RLLAEEEQQLLQR	3	4505	Acetyl:2H(3)@Any N-term	0	13	1921	1933	27	QE	0.980831	0.985471	0.891348	0.946103	pretrained
RQLLLDTTDKFR	2	4541	Acetyl:2H(3)@Any N-term;Acetyl:2H(3)@K	0;10	12	1933	1944	27	QE	0.929985	0.943053	0.78412	0.588865	pretrained
RILVATNLFGR	2	4617	Acetyl:2H(3)@Any N-term	0	11	1944	1954	27	QE	0.889798	0.894802	0.705367	0.339306	pretrained
RYADLTEDQLPSCESLKDTIAR	3	4625	Acetyl:2H(3)@Any N-term;Carbamidomethyl@C;Acetyl:2H(3)@K	0;13;17	22	1954	1975	27	QE	0.974184	0.977661	0.865186	0.626172	pretrained
RQVQSLTCEVDALKGTNESLER	3	4627	Acetyl:2H(3)@Any N-term;Carbamidomethyl@C;Acetyl:2H(3)@K	0;8;14	22	1975	1996	27	QE	0.969532	0.971874	0.848654	0.603007	pretrained
RYADLTEDQLPSCESLKDTIAR	2	4632	Acetyl:2H(3)@Any N-term;Carbamidomethyl@C;Acetyl:2H(3)@K	0;13;17	22	1996	2017	27	QE	0.933403	0.938434	0.775447	0.429523	pretrained
RQVQSLTCEVDALKGTNESLER	2	4638	Acetyl:2H(3)@Any N-term;Carbamidomethyl@C;Acetyl:2H(3)@K	0;8;14	22	2017	2038	27	QE	0.872066	0.877937	0.682161	0.52518	pretrained
RIFQEPTEPKTKAAAPGVEDEPLLR	3	4657	Acetyl:2H(3)@Any N-term;Acetyl:2H(3)@K;Acetyl:2H(3)@K	0;10;12	25	2038	2062	27	QE	0.947746	0.949167	0.796143	0.290661	pretrained
RPSSLQSLFGLPEAAGAR	3	4879	Acetyl:2H(3)@Any N-term	0	18	2062	2079	27	QE	0.969649	0.971762	0.84835	0.744952	pretrained
RVEKKANKLAFKLEKR	3	4930	Acetyl:2H(3)@Any N-term;Acetyl:2H(3)@K;Acetyl:2H(3)@K;Acetyl:2H(3)@K;Acetyl:2H(3)@K;Acetyl:2H(3)@K	0;4;5;8;12;15	16	2079	2094	27	QE	0.780492	0.817947	0.609775	0.509614	pretrained
RPRDPTPSFYDLWAQEDPNAVLGR	3	4979	Acetyl:2H(3)@Any N-term	0	24	2094	2117	27	QE	0.980931	0.982533	0.880837	0.496679	pretrained
RQGLEQFINKIAGHPLAQNER	3	5079	Acetyl:2H(3)@Any N-term;Acetyl:2H(3)@K	0;10	21	2117	2137	27	QE	0.944046	0.947273	0.792346	0.601418	pretrained
RLPGAIDVIGQTITISR	2	5142	Acetyl:2H(3)@Any N-term	0	17	2137	2153	27	QE	0.917025	0.926677	0.754695	0.390499	pretrained
RLPGAIDVIGQTITISR	3	5160	Acetyl:2H(3)@Any N-term	0	17	2153	2169	27	QE	0.957363	0.96301	0.826307	0.696154	pretrained
REALEKTEKQLEAIDQLHLEYAKR	3	5168	Acetyl:2H(3)@Any N-term;Acetyl:2H(3)@K;Acetyl:2H(3)@K;Acetyl:2H(3)@K	0;6;9;23	24	2169	2192	27	QE	0.719471	0.771996	0.561484	0.265146	pretrained
RGMTVEGLKQFIAAQGSSR	3	5320	Acetyl:2H(3)@Any N-term;Acetyl:2H(3)@K	0;9	19	2192	2210	27	QE	0.968183	0.972704	0.850914	0.872018	pretrained
REILGTCKMLGQMTDQVADLR	3	5439	Acetyl:2H(3)@Any N-term;Carbamidomethyl@C;Acetyl:2H(3)@K	0;7;8	21	2210	2230	27	QE	0.776616	0.807699	0.598574	0.541901	pretrained
RNPIYSLIDKKKQFR	3	5479	Acetyl:2H(3)@Any N-term;Acetyl:2H(3)@K;Acetyl:2H(3)@K;Acetyl:2H(3)@K	0;10;11;12	15	2230	2244	27	QE	0.88117	0.908314	0.725261	0.756664	pretrained
RILNEDGSPNLDFKPEDQPHFDIKDEF	3	5771	Acetyl:2H(3)@Any N-term;Acetyl:2H(3)@K;Acetyl:2H(3)@K	0;14;24	27	2244	2270	27	QE	0.85995	0.870448	0.672342	0.780193	pretrained
REPFLLSGGDDGALKIWDLR	3	5841	Acetyl:2H(3)@Any N-term;Acetyl:2H(3)@K	0;15	20	2270	2289	27	QE	0.943798	0.952389	0.802763	0.758524	pretrained
RDELLAQHAAGALGLPDLVAVLTR	3	5858	Acetyl:2H(3)@Any N-term	0	24	2289	2312	27	QE	0.917196	0.930147	0.760641	0.721514	pretrained
RDELLAQHAAGALGLPDLVAVLTR	4	5860	Acetyl:2H(3)@Any N-term	0	24	2312	2335	27	QE	0.869212	0.888316	0.696249	0.613851	pretrained
RGSQGDSKQQNGPPR	3	6136	Acetyl:2H(3)@Any N-term;Acetyl:2H(3)@K	0;8	15	2335	2349	27	QE	0.918869	0.93065	0.761515	0.606767	pretrained
RDHDNKQKSDDRGESER	4	6146	Acetyl:2H(3)@Any N-term;Acetyl:2H(3)@K;Acetyl:2H(3)@K	0;6;8	17	2349	2365	27	QE	0.841662	0.870433	0.672322	0.69359	pretrained
RGSQGDSKQQNGPPR	3	6160	Acetyl:2H(3)@Any N-term;Acetyl:2H(3)@K	0;8	15	2365	2379	27	QE	0.493899	0.542468	0.36502	0.15311	pretrained
RRGVGADPEAR	3	6164	Acetyl:2H(3)@Any N-term	0	11	2379	2389	27	QE	0.883233	0.895069	0.705747	0.234991	pretrained
RRPSKKKR	3	6168	Acetyl:2H(3)@Any N-term;Acetyl:2H(3)@K;Acetyl:2H(3)@K;Acetyl:2H(3)@K	0;5;6;7	8	2389	2396	27	QE	0.770107	0.821457	0.613677	-0.0621238	pretrained
REQKREQYR	3	6170	Acetyl:2H(3)@Any N-term;Acetyl:2H(3)@K	0;4	9	2396	2404	27	QE	0.778338	0.828452	0.621556	0.445565	pretrained
RGSSDPTVQR	2	6195	Acetyl:2H(3)@Any N-term	0	10	2404	2413	27	QE	0.994446	0.994925	0.935833	0.503604	pretrained
RRGKAEEQAVR	3	6196	Acetyl:2H(3)@Any N-term;Acetyl:2H(3)@K	0;4	11	2413	2423	27	QE	0.728137	0.775275	0.564778	0.537054	pretrained
RRGKAEEQAVR	2	6201	Acetyl:2H(3)@Any N-term;Acetyl:2H(3)@K	0;4	11	2423	2433	27	QE	0.915395	0.927825	0.756647	0.418855	pretrained
RGESMQPNR	2	6207	Acetyl:2H(3)@Any N-term	0	9	2433	2441	27	QE	0.918914	0.93581	0.77066	0.868218	pretrained
RQEVADHPKR	3	6219	Acetyl:2H(3)@Any N-term;Acetyl:2H(3)@K	0;9	10	2441	2450	27	QE	0.915348	0.926191	0.753874	0.465766	pretrained
RSKTKEAR	2	6235	Acetyl:2H(3)@Any N-term;Acetyl:2H(3)@K;Acetyl:2H(3)@K	0;3;5	8	2450	2457	27	QE	0.939294	0.943443	0.784868	0.605364	pretrained
RAEATAASTSR	2	6239	Acetyl:2H(3)@Any N-term	0	11	2457	2467	27	QE	0.915396	0.92388	0.750001	0.402908	pretrained
RSKTKEAR	2	6256	Acetyl:2H(3)@Any N-term;Acetyl:2H(3)@K;Acetyl:2H(3)@K	0;3;5	8	2467	2474	27	QE	0.975427	0.975979	0.860183	0.520252	pretrained
RSKTKEAR	2	6294	Acetyl:2H(3)@Any N-term;Acetyl:2H(3)@K;Acetyl:2H(3)@K	0;3;5	8	2474	2481	27	QE	0.927517	0.936298	0.771543	0.63191	pretrained
RGSQGDSKQQNGPPR	2	6304	Acetyl:2H(3)@Any N-term;Acetyl:2H(3)@K	0;8	15	2481	2495	27	QE	0.977223	0.976333	0.86122	0.936295	pretrained
RGSQGDSKQQNGPPR	3	6307	Acetyl:2H(3)@Any N-term;Acetyl:2H(3)@K	0;8	15	2495	2509	27	QE	0.974701	0.978828	0.868767	0.707075	pretrained
RLGPGSSGGSAR	2	6367	Acetyl:2H(3)@Any N-term	0	12	2509	2520	27	QE	0.879386	0.894588	0.705062	0.174207	pretrained
RMEELHNQEMQKR	3	6383	Acetyl:2H(3)@Any N-term;Oxidation@M;Oxidation@M;Acetyl:2H(3)@K	0;2;10;12	13	2520	2532	27	QE	0.955354	0.964979	0.831021	0.928137	pretrained
RETEEKMRR	3	6416	Acetyl:2H(3)@Any N-term;Acetyl:2H(3)@K	0;6	9	2532	2540	27	QE	0.775783	0.823173	0.615596	0.381232	pretrained
REALER	2	6424	Acetyl:2H(3)@Any N-term	0	6	2540	2545	27	QE	0.992152	0.99385	0.929357	0.98797	pretrained
RDHFEEAMR	3	6435	Acetyl:2H(3)@Any N-term;Oxidation@M	0;8	9	2545	2553	27	QE	0.974323	0.978128	0.866608	0.786474	pretrained
RLSTPQR	2	6447	Acetyl:2H(3)@Any N-term	0	7	2553	2559	27	QE	0.982987	0.985005	0.889615	0.80913	pretrained
RGVSREEIER	3	6456	Acetyl:2H(3)@Any N-term	0	10	2559	2568	27	QE	0.951523	0.957783	0.814357	0.527156	pretrained
RTRRPKEEDPATGTGDPPR	4	6459	Acetyl:2H(3)@Any N-term;Acetyl:2H(3)@K	0;6	19	2568	2586	27	QE	0.961246	0.963332	0.827069	0.585086	pretrained
RKKIDRNPR	3	6461	Acetyl:2H(3)@Any N-term;Acetyl:2H(3)@K;Acetyl:2H(3)@K	0;2;3	9	2586	2594	27	QE	0.653427	0.727225	0.51838	0.374084	pretrained
RRGNDPLTSSPGR	3	6468	Acetyl:2H(3)@Any N-term	0	13	2594	2606	27	QE	0.946647	0.948182	0.794161	0.633413	pretrained
RKSTLASR	2	6519	Acetyl:2H(3)@Any N-term;Acetyl:2H(3)@K	0;2	8	2606	2613	27	QE	0.842891	0.872998	0.675655	0.477012	pretrained
RGPEEDRFSR	3	6523	Acetyl:2H(3)@Any N-term	0	10	2613	2622	27	QE	0.769324	0.833414	0.627234	0.810811	pretrained
RPYEKGR	2	6544	Acetyl:2H(3)@Any N-term;Acetyl:2H(3)@K	0;5	7	2622	2628	27	QE	0.885595	0.910908	0.729235	0.533044	pretrained
RTVVDSEGR	2	6556	Acetyl:2H(3)@Any N-term	0	9	2628	2636	27	QE	0.969887	0.975912	0.859985	0.878116	pretrained
RRPPQPIQQPQR	3	6569	Acetyl:2H(3)@Any N-term	0	12	2636	2647	27	QE	0.900971	0.915558	0.736501	0.580479	pretrained
RSVSDNDIR	2	6577	Acetyl:2H(3)@Any N-term	0	9	2647	2655	27	QE	0.985354	0.986543	0.895441	0.726723	pretrained
RTVQQLR	2	6585	Acetyl:2H(3)@Any N-term	0	7	2655	2661	27	QE	0.736569	0.794156	0.584174	0.689565	pretrained
RLEEKR	2	6601	Acetyl:2H(3)@Any N-term;Acetyl:2H(3)@K	0;5	6	2661	2666	27	QE	0.917879	0.941454	0.781079	0.885714	pretrained
RQPKYPR	2	6608	Acetyl:2H(3)@Any N-term;Acetyl:2H(3)@K	0;4	7	2666	2672	27	QE	0.877838	0.91338	0.733074	0.676087	pretrained
RREGKTDYYAR	3	6633	Acetyl:2H(3)@Any N-term;Acetyl:2H(3)@K	0;5	11	2672	2682	27	QE	0.747432	0.791365	0.581259	0.519794	pretrained
RFSEGTSADR	2	6636	Acetyl:2H(3)@Any N-term	0	10	2682	2691	27	QE	0.987719	0.988366	0.902795	0.585199	pretrained
RMEELHNQEVQKR	3	6647	Acetyl:2H(3)@Any N-term;Oxidation@M;Acetyl:2H(3)@K	0;2;12	13	2691	2703	27	QE	0.960705	0.968486	0.839753	0.948165	pretrained
RVKTQSESGDVSR	2	6648	Acetyl:2H(3)@Any N-term;Acetyl:2H(3)@K	0;3	13	2703	2715	27	QE	0.922185	0.929908	0.760227	0.368595	pretrained
RKEQLER	2	6650	Acetyl:2H(3)@Any N-term;Acetyl:2H(3)@K	0;2	7	2715	2721	27	QE	0.966382	0.971691	0.848159	0.629565	pretrained
RAPPPAVAAR	2	6677	Acetyl:2H(3)@Any N-term	0	10	2721	2730	27	QE	0.920306	0.937367	0.773488	0.766667	pretrained
RDDGLSAAAR	2	6697	Acetyl:2H(3)@Any N-term	0	10	2730	2739	27	QE	0.955313	0.96459	0.830078	0.533205	pretrained
RPREPPEQELQR	3	6710	Acetyl:2H(3)@Any N-term	0	12	2739	2750	27	QE	0.836325	0.880777	0.685958	0.738548	pretrained
RELEKGR	2	6721	Acetyl:2H(3)@Any N-term;Acetyl:2H(3)@K	0;5	7	2750	2756	27	QE	0.717871	0.757679	0.547334	0.888261	pretrained
RAVSPSNPKAR	2	6728	Acetyl:2H(3)@Any N-term;Acetyl:2H(3)@K	0;9	11	2756	2766	27	QE	0.884985	0.908105	0.724942	0.793058	pretrained
RMEELHNQEMQKR	3	6732	Acetyl:2H(3)@Any N-term;Oxidation@M;Acetyl:2H(3)@K	0;2;12	13	2766	2778	27	QE	0.968741	0.975169	0.857834	0.947351	pretrained
RQVPVEEAR	2	6740	Acetyl:2H(3)@Any N-term	0	9	2778	2786	27	QE	0.92952	0.94417	0.786268	0.757881	pretrained
RSNPDLEKR	2	6761	Acetyl:2H(3)@Any N-term;Acetyl:2H(3)@K	0;8	9	2786	2794	27	QE	0.904096	0.92659	0.754548	0.509714	pretrained
RTLPSTSSSGSKR	2	6767	Acetyl:2H(3)@Any N-term;Acetyl:2H(3)@K	0;12	13	2794	2806	27	QE	0.918266	0.927674	0.756389	0.181014	pretrained
REVEKAKR	2	6783	Acetyl:2H(3)@Any N-term;Acetyl:2H(3)@K;Acetyl:2H(3)@K	0;5;7	8	2806	2813	27	QE	0.803477	0.849475	0.646162	0.437329	pretrained
REVEKAKR	2	6836	Acetyl:2H(3)@Any N-term;Acetyl:2H(3)@K;Acetyl:2H(3)@K	0;5;7	8	2813	2820	27	QE	0.781953	0.834683	0.628699	0.477832	pretrained
RLQAESESAATR	2	6849	Acetyl:2H(3)@Any N-term	0	12	2820	2831	27	QE	0.839037	0.839617	0.634441	0.0433403	pretrained
RKTEEAAAANKR	3	6860	Acetyl:2H(3)@Any N-term;Acetyl:2H(3)@K;Acetyl:2H(3)@K	0;2;11	12	2831	2842	27	QE	0.917726	0.932463	0.764689	0.693939	pretrained
RKTEEAAAANKR	2	6867	Acetyl:2H(3)@Any N-term;Acetyl:2H(3)@K;Acetyl:2H(3)@K	0;2;11	12	2842	2853	27	QE	0.887678	0.903689	0.718304	0.510994	pretrained
RCHLEAKYR	3	6868	Acetyl:2H(3)@Any N-term;Carbamidomethyl@C;Acetyl:2H(3)@K	0;2;7	9	2853	2861	27	QE	0.886272	0.909587	0.727203	0.747801	pretrained
RKQHSLLKR	3	6869	Acetyl:2H(3)@Any N-term;Acetyl:2H(3)@K;Acetyl:2H(3)@K	0;2;8	9	2861	2869	27	QE	0.90481	0.9241	0.750366	0.607405	pretrained
RRDPGAAVPGAANASAQQPR	3	6937	Acetyl:2H(3)@Any N-term	0	20	2869	2888	27	QE	0.94002	0.951383	0.800673	0.858291	pretrained
RAVQSGHVNLKDR	3	7072	Acetyl:2H(3)@Any N-term;Acetyl:2H(3)@K	0;11	13	2888	2900	27	QE	0.893085	0.910284	0.728274	0.651053	pretrained
RNEKIAVHCTVR	3	7105	Acetyl:2H(3)@Any N-term;Acetyl:2H(3)@K;Carbamidomethyl@C	0;4;9	12	2900	2911	27	QE	0.915456	0.933368	0.76629	0.953629	pretrained
RYIKNPR	2	7107	Acetyl:2H(3)@Any N-term;Acetyl:2H(3)@K	0;4	7	2911	2917	27	QE	0.866542	0.909517	0.727096	0.818696	pretrained
RLPDAHSDYAR	3	7128	Acetyl:2H(3)@Any N-term	0	11	2917	2927	27	QE	0.970391	0.974845	0.856907	0.881895	pretrained
RPFEKSR	2	7158	Acetyl:2H(3)@Any N-term;Acetyl:2H(3)@K	0;5	7	2927	2933	27	QE	0.851874	0.88143	0.686837	0.481304	pretrained
RQEKWQQEQER	3	7194	Acetyl:2H(3)@Any N-term;Acetyl:2H(3)@K	0;4	11	2933	2943	27	QE	0.847725	0.879852	0.684717	0.873265	pretrained
RPFEKSR	2	7196	Acetyl:2H(3)@Any N-term;Acetyl:2H(3)@K	0;5	7	2943	2949	27	QE	0.882559	0.908825	0.726038	0.68087	pretrained
RQEKWQQEQER	2	7204	Acetyl:2H(3)@Any N-term;Acetyl:2H(3)@K	0;4	11	2949	2959	27	QE	0.954054	0.96407	0.828828	0.659193	pretrained
RIDQLNR	2	7206	Acetyl:2H(3)@Any N-term	0	7	2959	2965	27	QE	0.90342	0.926228	0.753936	0.904348	pretrained
RTEEGPTLSYGRDGR	3	7211	Acetyl:2H(3)@Any N-term	0	15	2965	2979	27	QE	0.914178	0.921914	0.746751	0.506152	pretrained
RQDLLSR	2	7240	Acetyl:2H(3)@Any N-term	0	7	2979	2985	27	QE	0.921579	0.941289	0.780768	0.929565	pretrained
RQSIAKEKEER	2	7256	Acetyl:2H(3)@Any N-term;Acetyl:2H(3)@K;Acetyl:2H(3)@K	0;6;8	11	2985	2995	27	QE	0.898212	0.917343	0.739341	0.624578	pretrained
RDALLSR	2	7303	Acetyl:2H(3)@Any N-term	0	7	2995	3001	27	QE	0.961105	0.971253	0.846984	0.815652	pretrained
RPYDLDR	2	7306	Acetyl:2H(3)@Any N-term	0	7	3001	3007	27	QE	0.909116	0.928577	0.757934	0.606957	pretrained
RIKIESNR	2	7309	Acetyl:2H(3)@Any N-term;Acetyl:2H(3)@K	0;3	8	3007	3014	27	QE	0.947873	0.961376	0.822485	0.856596	pretrained
RLSYNTASNKTR	2	7380	Acetyl:2H(3)@Any N-term;Acetyl:2H(3)@K	0;10	12	3014	3025	27	QE	0.880514	0.893659	0.703741	0.328682	pretrained
RGERPDYKGEEELR	3	7385	Acetyl:2H(3)@Any N-term;Acetyl:2H(3)@K	0;8	14	3025	3038	27	QE	0.567769	0.625226	0.429987	0.330231	pretrained
RLSYNTASNKTR	3	7386	Acetyl:2H(3)@Any N-term;Acetyl:2H(3)@K	0;10	12	3038	3049	27	QE	0.949031	0.957243	0.813166	0.826991	pretrained
RFEKPGR	2	7387	Acetyl:2H(3)@Any N-term;Acetyl:2H(3)@K	0;4	7	3049	3055	27	QE	0.249097	0.461601	0.305449	0.438261	pretrained
RKESSTPEEFSR	2	7392	Acetyl:2H(3)@Any N-term;Acetyl:2H(3)@K	0;2	12	3055	3066	27	QE	0.917034	0.937329	0.773419	0.735025	pretrained
RVYDISR	2	7405	Acetyl:2H(3)@Any N-term	0	7	3066	3072	27	QE	0.863935	0.894	0.704225	0.68	pretrained
RAGAGDFMR	2	7421	Acetyl:2H(3)@Any N-term	0	9	3072	3080	27	QE	0.975181	0.979325	0.870322	0.684567	pretrained
RKVLEEEEQRR	3	7457	Acetyl:2H(3)@Any N-term;Acetyl:2H(3)@K	0;2	11	3080	3090	27	QE	0.866882	0.902746	0.716904	0.889212	pretrained
RLKDQDQDEDEEEKEKRGR	3	7467	Acetyl:2H(3)@Any N-term;Acetyl:2H(3)@K;Acetyl:2H(3)@K;Acetyl:2H(3)@K	0;3;14;16	19	3090	3108	27	QE	0.428213	0.494195	0.329074	0.415991	pretrained
REPMLVR	2	7482	Acetyl:2H(3)@Any N-term	0	7	3108	3114	27	QE	0.974561	0.980095	0.872768	0.893913	pretrained
REEEGLQLR	2	7492	Acetyl:2H(3)@Any N-term	0	9	3114	3122	27	QE	0.962095	0.971198	0.846838	0.842925	pretrained
RAGAGDFMR	2	7495	Acetyl:2H(3)@Any N-term	0	9	3122	3130	27	QE	0.885149	0.903778	0.718436	0.417705	pretrained
RAQLPKYQR	2	7534	Acetyl:2H(3)@Any N-term;Acetyl:2H(3)@K	0;6	9	3130	3138	27	QE	0.931207	0.946365	0.79055	0.746334	pretrained
RKSLLTR	2	7535	Acetyl:2H(3)@Any N-term;Acetyl:2H(3)@K	0;2	7	3138	3144	27	QE	0.964198	0.970913	0.846076	0.826957	pretrained
RITSDFR	2	7536	Acetyl:2H(3)@Any N-term	0	7	3144	3150	27	QE	0.986812	0.987952	0.901078	0.59087	pretrained
RQPKTPLEKR	2	7543	Acetyl:2H(3)@Any N-term;Acetyl:2H(3)@K;Acetyl:2H(3)@K	0;4;9	10	3150	3159	27	QE	0.781924	0.827092	0.620013	0.731017	pretrained
RQPKTPLEKR	3	7548	Acetyl:2H(3)@Any N-term;Acetyl:2H(3)@K;Acetyl:2H(3)@K	0;4;9	10	3159	3168	27	QE	0.907387	0.927352	0.755841	0.984041	pretrained
RCESKKFGGPGAR	2	7559	Acetyl:2H(3)@Any N-term;Carbamidomethyl@C;Acetyl:2H(3)@K;Acetyl:2H(3)@K	0;2;5;6	13	3168	3180	27	QE	0.922531	0.926539	0.754462	0.460866	pretrained
RVGFVGAGR	2	7577	Acetyl:2H(3)@Any N-term	0	9	3180	3188	27	QE	0.944796	0.952071	0.802102	0.530242	pretrained
RAFSEGQITR	2	7581	Acetyl:2H(3)@Any N-term	0	10	3188	3197	27	QE	0.905779	0.905969	0.721712	0.451223	pretrained
RLDDEIGR	2	7583	Acetyl:2H(3)@Any N-term	0	8	3197	3204	27	QE	0.735084	0.802246	0.592723	0.674603	pretrained
RLPGENVKTNR	2	7624	Acetyl:2H(3)@Any N-term;Acetyl:2H(3)@K	0;8	11	3204	3214	27	QE	0.755501	0.78097	0.57055	0.191088	pretrained
RKNPLLR	2	7642	Acetyl:2H(3)@Any N-term;Acetyl:2H(3)@K	0;2	7	3214	3220	27	QE	0.951695	0.95956	0.818332	0.599565	pretrained
RSPNEEYVEVGR	2	7644	Acetyl:2H(3)@Any N-term	0	12	3220	3231	27	QE	0.869472	0.895954	0.707014	0.537914	pretrained
REKEMLER	2	7663	Acetyl:2H(3)@Any N-term;Acetyl:2H(3)@K	0;3	8	3231	3238	27	QE	0.98379	0.986208	0.894145	0.708539	pretrained
RQAVDVSPLR	2	7672	Acetyl:2H(3)@Any N-term	0	10	3238	3247	27	QE	0.941867	0.951701	0.801333	0.909781	pretrained
RMQNDTAENETTEKEEKSESR	3	7701	Acetyl:2H(3)@Any N-term;Acetyl:2H(3)@K;Acetyl:2H(3)@K	0;14;17	21	3247	3267	27	QE	0.942835	0.954567	0.807364	0.648617	pretrained
RMQNDTAENETTEKEEKSESR	2	7710	Acetyl:2H(3)@Any N-term;Acetyl:2H(3)@K;Acetyl:2H(3)@K	0;14;17	21	3267	3287	27	QE	0.929435	0.93516	0.769489	0.557829	pretrained
RNAEQYKDQADKASTR	3	7726	Acetyl:2H(3)@Any N-term;Acetyl:2H(3)@K;Acetyl:2H(3)@K	0;7;12	16	3287	3302	27	QE	0.97091	0.976331	0.861215	0.804529	pretrained
RKYKTIESETVR	3	7731	Acetyl:2H(3)@Any N-term;Acetyl:2H(3)@K;Acetyl:2H(3)@K	0;2;4	12	3302	3313	27	QE	0.926927	0.935458	0.770024	0.666808	pretrained
RNAEQYKDQADKASTR	2	7732	Acetyl:2H(3)@Any N-term;Acetyl:2H(3)@K;Acetyl:2H(3)@K	0;7;12	16	3313	3328	27	QE	0.9716	0.974884	0.857016	0.8	pretrained
RKQQTLEAEEAKR	3	7735	Acetyl:2H(3)@Any N-term;Acetyl:2H(3)@K;Acetyl:2H(3)@K	0;2;12	13	3328	3340	27	QE	0.878378	0.900271	0.713264	0.829624	pretrained
RGESLDNLDSPR	2	7761	Acetyl:2H(3)@Any N-term	0	12	3340	3351	27	QE	0.723748	0.763658	0.553197	0.730796	pretrained
RDAKKLVR	2	7767	Acetyl:2H(3)@Any N-term;Acetyl:2H(3)@K;Acetyl:2H(3)@K	0;4;5	8	3351	3358	27	QE	0.923773	0.937699	0.774096	0.64751	pretrained
RAHQKELAAQLNEEAKRR	4	7782	Acetyl:2H(3)@Any N-term;Acetyl:2H(3)@K;Acetyl:2H(3)@K	0;5;16	18	3358	3375	27	QE	0.882206	0.900258	0.713244	0.834256	pretrained
RVAAMSVAKR	2	7824	Acetyl:2H(3)@Any N-term;Acetyl:2H(3)@K	0;9	10	3375	3384	27	QE	0.947842	0.953744	0.805613	0.697555	pretrained
RFSDIQIRR	3	7825	Acetyl:2H(3)@Any N-term	0	9	3384	3392	27	QE	0.9435	0.951734	0.801401	0.480938	pretrained
RYNIPHGPVVGSTR	3	7842	Acetyl:2H(3)@Any N-term	0	14	3392	3405	27	QE	0.969719	0.974353	0.855508	0.680014	pretrained
RDAAASASTPAQAPTSDSPVAEDASR	3	7850	Acetyl:2H(3)@Any N-term	0	26	3405	3430	27	QE	0.981933	0.983809	0.885287	0.822352	pretrained
RIALKKQR	2	7873	Acetyl:2H(3)@Any N-term;Acetyl:2H(3)@K;Acetyl:2H(3)@K	0;5;6	8	3430	3437	27	QE	0.862763	0.896321	0.707541	0.95676	pretrained
RAVSKKKTALGKNHSR	3	7928	Acetyl:2H(3)@Any N-term;Acetyl:2H(3)@K;Acetyl:2H(3)@K;Acetyl:2H(3)@K;Acetyl:2H(3)@K	0;5;6;7;12	16	3437	3452	27	QE	0.90198	0.914011	0.734064	0.199166	pretrained
RAEAKKWQNTPR	2	8022	Acetyl:2H(3)@Any N-term;Acetyl:2H(3)@K;Acetyl:2H(3)@K	0;5;6	12	3452	3463	27	QE	0.789513	0.84382	0.639397	0.936011	pretrained
RAEEQMLKER	2	8024	Acetyl:2H(3)@Any N-term;Acetyl:2H(3)@K	0;8	10	3463	3472	27	QE	0.944639	0.959325	0.817802	0.891377	pretrained
RAEAKKWQNTPR	3	8030	Acetyl:2H(3)@Any N-term;Acetyl:2H(3)@K;Acetyl:2H(3)@K	0;5;6	12	3472	3483	27	QE	0.911141	0.927769	0.756552	0.673714	pretrained
RALAAPAAEEKEEAR	2	8062	Acetyl:2H(3)@Any N-term;Acetyl:2H(3)@K	0;11	15	3483	3497	27	QE	0.905525	0.923121	0.748742	0.706288	pretrained
RALAAPAAEEKEEAR	3	8076	Acetyl:2H(3)@Any N-term;Acetyl:2H(3)@K	0;11	15	3497	3511	27	QE	0.960112	0.965972	0.833447	0.833629	pretrained
RYQKSTELLIR	3	8093	Acetyl:2H(3)@Any N-term;Acetyl:2H(3)@K	0;4	11	3511	3521	27	QE	0.95527	0.965497	0.832281	0.739024	pretrained
RALAAPAAEEKEEAR	2	8097	Acetyl:2H(3)@Any N-term;Acetyl:2H(3)@K	0;11	15	3521	3535	27	QE	0.854291	0.879919	0.684806	0.422659	pretrained
RLEEQAAQHKADIEER	3	8182	Acetyl:2H(3)@Any N-term;Acetyl:2H(3)@K	0;10	16	3535	3550	27	QE	0.944209	0.949275	0.796361	0.609002	pretrained
RAASAATAAPTATPAAQESGTIPKKR	4	8357	Acetyl:2H(3)@Any N-term;Acetyl:2H(3)@K;Acetyl:2H(3)@K	0;24;25	26	3550	3575	27	QE	0.808443	0.824363	0.616933	0.527609	pretrained
RSNKKLPFNR	2	8383	Acetyl:2H(3)@Any N-term;Acetyl:2H(3)@K;Acetyl:2H(3)@K	0;4;5	10	3575	3584	27	QE	0.817216	0.841637	0.636816	0.687516	pretrained
RMTLTDSIER	2	8534	Acetyl:2H(3)@Any N-term	0	10	3584	3593	27	QE	0.962552	0.96836	0.839429	0.618147	pretrained
RGSLCATCGLPVTGR	2	8560	Acetyl:2H(3)@Any N-term;Carbamidomethyl@C;Carbamidomethyl@C	0;5;8	15	3593	3607	27	QE	0.916435	0.929666	0.759808	0.810492	pretrained
RGYFDEEMNR	2	8570	Acetyl:2H(3)@Any N-term	0	10	3607	3616	27	QE	0.845074	0.882486	0.688264	0.561776	pretrained
RRVGLKAPGIIPR	3	8577	Acetyl:2H(3)@Any N-term;Acetyl:2H(3)@K	0;6	13	3616	3628	27	QE	0.761667	0.780717	0.570292	0.322894	pretrained
RFTEELPDER	2	8581	Acetyl:2H(3)@Any N-term	0	10	3628	3637	27	QE	0.973121	0.975951	0.860101	0.934234	pretrained
RYQKSTELLIR	3	8589	Acetyl:2H(3)@Any N-term;Acetyl:2H(3)@K	0;4	11	3637	3647	27	QE	0.956391	0.966269	0.83418	0.862664	pretrained
RYQKSTELLIR	2	8591	Acetyl:2H(3)@Any N-term;Acetyl:2H(3)@K	0;4	11	3647	3657	27	QE	0.977595	0.98012	0.872846	0.644372	pretrained
RTMMEDFR	2	8635	Acetyl:2H(3)@Any N-term	0	8	3657	3664	27	QE	0.995878	0.99623	0.944704	0.700602	pretrained
RTGLQKVQSLR	2	8641	Acetyl:2H(3)@Any N-term;Acetyl:2H(3)@K	0;6	11	3664	3674	27	QE	0.942449	0.953017	0.804079	0.648593	pretrained
RYQKSTELLIR	3	8643	Acetyl:2H(3)@Any N-term;Acetyl:2H(3)@K	0;4	11	3674	3684	27	QE	0.953366	0.964031	0.828734	0.858161	pretrained
REEFVSIKR	2	8647	Acetyl:2H(3)@Any N-term;Acetyl:2H(3)@K	0;8	9	3684	3692	27	QE	0.921147	0.938529	0.775622	0.642962	pretrained
RKTPEELLR	2	8654	Acetyl:2H(3)@Any N-term;Acetyl:2H(3)@K	0;2	9	3692	3700	27	QE	0.65626	0.73658	0.527121	0.72544	pretrained
RNKKQIPSFR	2	8657	Acetyl:2H(3)@Any N-term;Acetyl:2H(3)@K;Acetyl:2H(3)@K	0;3;4	10	3700	3709	27	QE	0.709129	0.741767	0.532024	0.463063	pretrained
RYQKSTELLIR	3	8685	Acetyl:2H(3)@Any N-term;Acetyl:2H(3)@K	0;4	11	3709	3719	27	QE	0.962442	0.970949	0.846172	0.858349	pretrained
RQQEGFKGTFPDAR	2	8714	Acetyl:2H(3)@Any N-term;Acetyl:2H(3)@K	0;7	14	3719	3732	27	QE	0.985536	0.986224	0.894206	0.364595	pretrained
RKKKKSKGPSAAGEQEPDKESGASVDEVAR	4	8726	Acetyl:2H(3)@Any N-term;Acetyl:2H(3)@K;Acetyl:2H(3)@K;Acetyl:2H(3)@K;Acetyl:2H(3)@K;Acetyl:2H(3)@K;Acetyl:2H(3)@K	0;2;3;4;5;7;19	30	3732	3761	27	QE	0.666837	0.70459	0.497738	0.181302	pretrained
RQQEGFKGTFPDAR	3	8727	Acetyl:2H(3)@Any N-term;Acetyl:2H(3)@K	0;7	14	3761	3774	27	QE	0.893535	0.908044	0.724849	0.655639	pretrained
RKKKKSKGPSAAGEQEPDKESGASVDEVAR	3	8728	Acetyl:2H(3)@Any N-term;Acetyl:2H(3)@K;Acetyl:2H(3)@K;Acetyl:2H(3)@K;Acetyl:2H(3)@K;Acetyl:2H(3)@K;Acetyl:2H(3)@K	0;2;3;4;5;7;19	30	3774	3803	27	QE	0.716316	0.745553	0.535629	0.142648	pretrained
RYQKSTELLIR	3	8733	Acetyl:2H(3)@Any N-term;Acetyl:2H(3)@K	0;4	11	3803	3813	27	QE	0.956761	0.96668	0.835199	0.858537	pretrained
RATVVVGDLHPLR	3	8749	Acetyl:2H(3)@Any N-term	0	13	3813	3825	27	QE	0.942455	0.953574	0.805254	0.911637	pretrained
RQQEGFKGTFPDAR	2	8761	Acetyl:2H(3)@Any N-term;Acetyl:2H(3)@K	0;7	14	3825	3838	27	QE	0.983012	0.983621	0.884619	0.545718	pretrained
RIEEQKLLR	2	8762	Acetyl:2H(3)@Any N-term;Acetyl:2H(3)@K	0;6	9	3838	3846	27	QE	0.901075	0.923533	0.749424	0.892045	pretrained
RLLEGEDAHLTQYKKEPVTTR	4	8799	Acetyl:2H(3)@Any N-term;Acetyl:2H(3)@K;Acetyl:2H(3)@K	0;14;15	21	3846	3866	27	QE	0.93165	0.935726	0.770508	0.0216128	pretrained
RREEGAPGDPEAALEDNLAR	3	8812	Acetyl:2H(3)@Any N-term	0	20	3866	3885	27	QE	0.954593	0.956484	0.811501	0.678414	pretrained
RQQEGFKGTFPDAR	2	8818	Acetyl:2H(3)@Any N-term;Acetyl:2H(3)@K	0;7	14	3885	3898	27	QE	0.993481	0.993598	0.927927	0.602365	pretrained
RLEDFRVDPPMGEEGNHKR	4	8825	Acetyl:2H(3)@Any N-term;Acetyl:2H(3)@K	0;18	19	3898	3916	27	QE	0.938387	0.94431	0.786538	0.673307	pretrained
RRAELLEQALGNAQGR	3	8860	Acetyl:2H(3)@Any N-term	0	16	3916	3931	27	QE	0.901961	0.919975	0.743582	0.672992	pretrained
REELAPYPKSKKAVSR	2	8941	Acetyl:2H(3)@Any N-term;Acetyl:2H(3)@K;Acetyl:2H(3)@K;Acetyl:2H(3)@K	0;9;11;12	16	3931	3946	27	QE	0.757528	0.791421	0.581317	0.580995	pretrained
RGEAHLAVNDFELAR	3	8962	Acetyl:2H(3)@Any N-term	0	15	3946	3960	27	QE	0.900917	0.920103	0.743791	0.870608	pretrained
RGEAHLAVNDFELAR	2	8975	Acetyl:2H(3)@Any N-term	0	15	3960	3974	27	QE	0.95948	0.962156	0.824301	0.824709	pretrained
RGEAHLAVNDFELAR	3	8995	Acetyl:2H(3)@Any N-term	0	15	3974	3988	27	QE	0.878798	0.901224	0.714661	0.8081	pretrained
RGEAHLAVNDFELAR	3	9052	Acetyl:2H(3)@Any N-term	0	15	3988	4002	27	QE	0.858144	0.885143	0.691879	0.802392	pretrained
RIVDGKVVSETNDTKVLRH	3	9100	Acetyl:2H(3)@Any N-term;Acetyl:2H(3)@K;Acetyl:2H(3)@K	0;6;15	19	4002	4020	27	QE	0.823394	0.867309	0.668304	0.682825	pretrained
RALLSLR	2	9125	Acetyl:2H(3)@Any N-term	0	7	4020	4026	27	QE	0.981021	0.985352	0.8909	0.907826	pretrained
RKPDTIEVQQMKAQAR	3	9162	Acetyl:2H(3)@Any N-term;Acetyl:2H(3)@K;Acetyl:2H(3)@K	0;2;12	16	4026	4041	27	QE	0.950526	0.960341	0.820108	0.636705	pretrained
RKPDTIEVQQMKAQAR	2	9167	Acetyl:2H(3)@Any N-term;Acetyl:2H(3)@K;Acetyl:2H(3)@K	0;2;12	16	4041	4056	27	QE	0.982493	0.983718	0.884963	0.44579	pretrained
RKIMSSPLSKELR	2	9193	Acetyl:2H(3)@Any N-term;Acetyl:2H(3)@K;Oxidation@M;Acetyl:2H(3)@K	0;2;4;10	13	4056	4068	27	QE	0.969212	0.970151	0.844063	0.573057	pretrained
RKIMSSPLSKELR	3	9227	Acetyl:2H(3)@Any N-term;Acetyl:2H(3)@K;Oxidation@M;Acetyl:2H(3)@K	0;2;4;10	13	4068	4080	27	QE	0.882573	0.898663	0.710921	0.711409	pretrained
RYQKSTELLIR	2	9252	Acetyl:2H(3)@Any N-term;Acetyl:2H(3)@K	0;4	11	4080	4090	27	QE	0.964091	0.968478	0.839732	0.723265	pretrained
RYQKSTELLIR	3	9277	Acetyl:2H(3)@Any N-term;Acetyl:2H(3)@K	0;4	11	4090	4100	27	QE	0.954766	0.964602	0.830107	0.880582	pretrained
RYQKSTELLIR	2	9303	Acetyl:2H(3)@Any N-term;Acetyl:2H(3)@K	0;4	11	4100	4110	27	QE	0.951336	0.957417	0.813549	0.86576	pretrained
RKEYDALKAAKR	2	9315	Acetyl:2H(3)@Any N-term;Acetyl:2H(3)@K;Acetyl:2H(3)@K;Acetyl:2H(3)@K	0;2;8;11	12	4110	4121	27	QE	0.972085	0.973221	0.852338	0.654475	pretrained
RNLGSINTELQDVQR	2	9321	Acetyl:2H(3)@Any N-term	0	15	4121	4135	27	QE	0.982863	0.983511	0.884232	0.790533	pretrained
RNLGSINTELQDVQR	3	9323	Acetyl:2H(3)@Any N-term	0	15	4135	4149	27	QE	0.986661	0.989476	0.907557	0.803759	pretrained
RYQKSTELLIR	2	9351	Acetyl:2H(3)@Any N-term;Acetyl:2H(3)@K	0;4	11	4149	4159	27	QE	0.963761	0.967867	0.838178	0.789775	pretrained
RQILETMQNDRTTISR	3	9367	Acetyl:2H(3)@Any N-term	0	16	4159	4174	27	QE	0.888573	0.903496	0.718016	0.657405	pretrained
RYQKSTELLIR	2	9431	Acetyl:2H(3)@Any N-term;Acetyl:2H(3)@K	0;4	11	4174	4184	27	QE	0.979102	0.981849	0.878521	0.848405	pretrained
RYQKSTELLIR	2	9479	Acetyl:2H(3)@Any N-term;Acetyl:2H(3)@K	0;4	11	4184	4194	27	QE	0.98233	0.985089	0.889927	0.684803	pretrained
RQLLATLR	2	9489	Acetyl:2H(3)@Any N-term	0	8	4194	4201	27	QE	0.977385	0.981752	0.878194	0.738643	pretrained
RVVSEIPVLKTNAGPRDR	3	9490	Acetyl:2H(3)@Any N-term;Acetyl:2H(3)@K	0;10	18	4201	4218	27	QE	0.90656	0.916609	0.73817	0.718346	pretrained
RYQKSTELLIR	2	9536	Acetyl:2H(3)@Any N-term;Acetyl:2H(3)@K	0;4	11	4218	4228	27	QE	0.946046	0.953004	0.804053	0.696154	pretrained
RAGGPEGPPWLPR	2	9538	Acetyl:2H(3)@Any N-term	0	13	4228	4240	27	QE	0.881596	0.905632	0.721207	0.496689	pretrained
RLQQTQNQVDEVVDIMR	2	9573	Acetyl:2H(3)@Any N-term;Oxidation@M	0;16	17	4240	4256	27	QE	0.938486	0.942996	0.78401	0.531731	pretrained
RYQKSTELLIR	2	9591	Acetyl:2H(3)@Any N-term;Acetyl:2H(3)@K	0;4	11	4256	4266	27	QE	0.960332	0.961144	0.82195	0.703002	pretrained
RNFAELKIKR	2	9603	Acetyl:2H(3)@Any N-term;Acetyl:2H(3)@K;Acetyl:2H(3)@K	0;7;9	10	4266	4275	27	QE	0.888303	0.89573	0.706692	0.420077	pretrained
RNFAELKIKR	3	9612	Acetyl:2H(3)@Any N-term;Acetyl:2H(3)@K;Acetyl:2H(3)@K	0;7;9	10	4275	4284	27	QE	0.919701	0.939087	0.776653	0.930631	pretrained
RGEDVETSKKWAAGQNKQHSITKNTAKLDR	4	9634	Acetyl:2H(3)@Any N-term;Acetyl:2H(3)@K;Acetyl:2H(3)@K;Acetyl:2H(3)@K;Acetyl:2H(3)@K;Acetyl:2H(3)@K	0;9;10;17;23;27	30	4284	4313	27	QE	0.845801	0.863424	0.663369	0.783604	pretrained
RGEDVETSKKWAAGQNKQHSITKNTAKLDR	3	9635	Acetyl:2H(3)@Any N-term;Acetyl:2H(3)@K;Acetyl:2H(3)@K;Acetyl:2H(3)@K;Acetyl:2H(3)@K;Acetyl:2H(3)@K	0;9;10;17;23;27	30	4313	4342	27	QE	0.752986	0.788348	0.578127	0.261711	pretrained
RGGVKRISGLIYEETR	3	9648	Acetyl:2H(3)@Any N-term;Acetyl:2H(3)@K	0;5	16	4342	4357	27	QE	0.862309	0.875299	0.678671	0.765824	pretrained
RLLEGEDAHLTQYKKEPVTTR	3	9671	Acetyl:2H(3)@Any N-term;Acetyl:2H(3)@K;Acetyl:2H(3)@K	0;14;15	21	4357	4377	27	QE	0.803757	0.840055	0.634955	0.528938	pretrained
RLLEGEDAHLTQYKKEPVTTR	4	9673	Acetyl:2H(3)@Any N-term;Acetyl:2H(3)@K;Acetyl:2H(3)@K	0;14;15	21	4377	4397	27	QE	0.929479	0.931892	0.763686	0.408626	pretrained
REYLKTLNEEKR	3	9687	Acetyl:2H(3)@Any N-term;Acetyl:2H(3)@K;Acetyl:2H(3)@K	0;5;11	12	4397	4408	27	QE	0.972905	0.977624	0.865073	0.747357	pretrained
RFGDKLNFR	2	9690	Acetyl:2H(3)@Any N-term;Acetyl:2H(3)@K	0;5	9	4408	4416	27	QE	0.909637	0.928721	0.758182	0.801503	pretrained
RYQKSTELLIR	2	9692	Acetyl:2H(3)@Any N-term;Acetyl:2H(3)@K	0;4	11	4416	4426	27	QE	0.964617	0.965986	0.833482	0.639681	pretrained
RYQKSTELLIR	2	9767	Acetyl:2H(3)@Any N-term;Acetyl:2H(3)@K	0;4	11	4426	4436	27	QE	0.94975	0.949455	0.796726	0.519512	pretrained
RLLEGEDAHLTQYKKEPVTTR	3	9788	Acetyl:2H(3)@Any N-term;Acetyl:2H(3)@K;Acetyl:2H(3)@K	0;14;15	21	4436	4456	27	QE	0.731296	0.782643	0.572258	0.442264	pretrained
RGDMSSNPAKETFTTGLDAPR	3	9841	Acetyl:2H(3)@Any N-term;Acetyl:2H(3)@K	0;10	21	4456	4476	27	QE	0.937986	0.945368	0.788595	0.696343	pretrained
RAQKKAQIEEEKKNAEKEKQQR	4	9861	Acetyl:2H(3)@Any N-term;Acetyl:2H(3)@K;Acetyl:2H(3)@K;Acetyl:2H(3)@K;Acetyl:2H(3)@K;Acetyl:2H(3)@K;Acetyl:2H(3)@K	0;4;5;12;13;17;19	22	4476	4497	27	QE	0.741699	0.78664	0.576363	0.383973	pretrained
RAQKKAQIEEEKKNAEKEKQQR	3	9864	Acetyl:2H(3)@Any N-term;Acetyl:2H(3)@K;Acetyl:2H(3)@K;Acetyl:2H(3)@K;Acetyl:2H(3)@K;Acetyl:2H(3)@K;Acetyl:2H(3)@K	0;4;5;12;13;17;19	22	4497	4518	27	QE	0.881638	0.902981	0.717252	0.203189	pretrained
RDALKMKLNKAR	3	9959	Acetyl:2H(3)@Any N-term;Acetyl:2H(3)@K;Acetyl:2H(3)@K;Acetyl:2H(3)@K	0;5;7;10	12	4518	4529	27	QE	0.902931	0.920022	0.743658	0.820719	pretrained
RASDTSLTQGLKAFR	3	10052	Acetyl:2H(3)@Any N-term;Acetyl:2H(3)@K	0;12	15	4529	4543	27	QE	0.941336	0.951882	0.801707	0.784723	pretrained
RKIMSSPLSKELR	2	10066	Acetyl:2H(3)@Any N-term;Acetyl:2H(3)@K;Acetyl:2H(3)@K	0;2;10	13	4543	4555	27	QE	0.893368	0.904934	0.720161	0.828376	pretrained
RKIMSSPLSKELR	3	10069	Acetyl:2H(3)@Any N-term;Acetyl:2H(3)@K;Acetyl:2H(3)@K	0;2;10	13	4555	4567	27	QE	0.932827	0.943039	0.784092	0.579136	pretrained
RELITPKGGGGGGPGEGFDVAKTGDAR	3	10156	Acetyl:2H(3)@Any N-term;Acetyl:2H(3)@K;Acetyl:2H(3)@K	0;7;22	27	4567	4593	27	QE	0.947968	0.951571	0.801062	0.37001	pretrained
RALKSEFLVR	2	10163	Acetyl:2H(3)@Any N-term;Acetyl:2H(3)@K	0;4	10	4593	4602	27	QE	0.959922	0.96503	0.831144	0.843629	pretrained
RAEDGSVIDYELIDQDAR	3	10170	Acetyl:2H(3)@Any N-term	0	18	4602	4619	27	QE	0.884164	0.906269	0.722164	0.815838	pretrained
RAEDGSVIDYELIDQDAR	2	10177	Acetyl:2H(3)@Any N-term	0	18	4619	4636	27	QE	0.932702	0.942511	0.783085	0.793297	pretrained
RAPEEELPPLDPEEIR	2	10258	Acetyl:2H(3)@Any N-term	0	16	4636	4651	27	QE	0.99536	0.995663	0.940686	0.60439	pretrained
RALAAQLPVLPR	2	10325	Acetyl:2H(3)@Any N-term	0	12	4651	4662	27	QE	0.8866	0.913176	0.732756	0.721917	pretrained
RKVDWLTEKMHAR	3	10338	Acetyl:2H(3)@Any N-term;Acetyl:2H(3)@K;Acetyl:2H(3)@K	0;2;9	13	4662	4674	27	QE	0.945894	0.956649	0.811862	0.487028	pretrained
RAMELLKVSKDKR	3	10450	Acetyl:2H(3)@Any N-term;Acetyl:2H(3)@K;Acetyl:2H(3)@K;Acetyl:2H(3)@K	0;7;10;12	13	4674	4686	27	QE	0.865382	0.889364	0.697704	0.65279	pretrained
RSTQGVTLTDLQEAEKTIGR	2	10681	Acetyl:2H(3)@Any N-term;Acetyl:2H(3)@K	0;16	20	4686	4705	27	QE	0.971378	0.974021	0.854571	0.236938	pretrained
RLQQTQNQVDEVVDIMR	3	10720	Acetyl:2H(3)@Any N-term	0	17	4705	4721	27	QE	0.967111	0.973399	0.852833	0.845742	pretrained
RIQDPVLQAVTSQTSLPGH	3	10765	Acetyl:2H(3)@Any N-term	0	19	4721	4739	27	QE	0.976634	0.979831	0.871922	0.721976	pretrained
RGIKKITSTAL	2	10842	Acetyl:2H(3)@Any N-term;Acetyl:2H(3)@K;Acetyl:2H(3)@K	0;4;5	11	4739	4749	27	QE	0.569601	0.665511	0.463572	0.391932	pretrained
RLMKELEEIR	2	10875	Acetyl:2H(3)@Any N-term;Acetyl:2H(3)@K	0;4	10	4749	4758	27	QE	0.976134	0.976231	0.860919	0.867954	pretrained
RGPCIIYNEDNGIIKAFR	3	11009	Acetyl:2H(3)@Any N-term;Carbamidomethyl@C;Acetyl:2H(3)@K	0;4;15	18	4758	4775	27	QE	0.968423	0.973022	0.851788	0.556457	pretrained
RKPKENNFKAVLETIR	3	11253	Acetyl:2H(3)@Any N-term;Acetyl:2H(3)@K;Acetyl:2H(3)@K;Acetyl:2H(3)@K	0;2;4;9	16	4775	4790	27	QE	0.931932	0.935058	0.769305	0.712726	pretrained
RPSAAPASQQLQSLESKLTSVR	3	11324	Acetyl:2H(3)@Any N-term;Acetyl:2H(3)@K	0;17	22	4790	4811	27	QE	0.960948	0.967593	0.837485	0.70082	pretrained
RLPGAIDVIGQTITISR	3	11446	Acetyl:2H(3)@Any N-term	0	17	4811	4827	27	QE	0.987733	0.989352	0.907012	0.829258	pretrained
RTEKKLKDVLLQVDDER	3	11526	Acetyl:2H(3)@Any N-term;Acetyl:2H(3)@K;Acetyl:2H(3)@K;Acetyl:2H(3)@K	0;4;5;7	17	4827	4843	27	QE	0.744913	0.792803	0.582758	0.42239	pretrained
RQDLEDSLQAQQYFADANEAESWMR	3	11548	Acetyl:2H(3)@Any N-term	0	25	4843	4867	27	QE	0.746963	0.775865	0.565372	0.275482	pretrained
RGPFELEAFYSDPQGVPYPEAKIGR	3	11588	Acetyl:2H(3)@Any N-term;Acetyl:2H(3)@K	0;22	25	4867	4891	27	QE	0.952064	0.954078	0.806322	0.46975	pretrained
RLGLSTLGELKQNLSR	2	11675	Acetyl:2H(3)@Any N-term;Acetyl:2H(3)@K	0;11	16	4891	4906	27	QE	0.845283	0.869198	0.670728	0.475382	pretrained
RLGLSTLGELKQNLSR	3	11698	Acetyl:2H(3)@Any N-term;Acetyl:2H(3)@K	0;11	16	4906	4921	27	QE	0.975972	0.980159	0.872971	0.822062	pretrained
RTEKKLKDVLLQVDDER	2	11728	Acetyl:2H(3)@Any N-term;Acetyl:2H(3)@K;Acetyl:2H(3)@K;Acetyl:2H(3)@K	0;4;5;7	17	4921	4937	27	QE	0.8583	0.870081	0.671867	0.332875	pretrained
RTEKKLKDVLLQVDDER	3	11729	Acetyl:2H(3)@Any N-term;Acetyl:2H(3)@K;Acetyl:2H(3)@K;Acetyl:2H(3)@K	0;4;5;7	17	4937	4953	27	QE	0.810181	0.844401	0.640086	0.485211	pretrained
RQDLEDSLQAQQYFADANEAESWMR	3	11742	Acetyl:2H(3)@Any N-term	0	25	4953	4977	27	QE	0.946685	0.958002	0.814842	0.666495	pretrained
RPFTKNLGLEELGIELDPR	3	12054	Acetyl:2H(3)@Any N-term;Acetyl:2H(3)@K	0;5	19	4977	4995	27	QE	0.978539	0.978876	0.868915	0.707923	pretrained
RGGVPSWFGL	2	12148	Acetyl:2H(3)@Any N-term	0	10	4995	5004	27	QE	0.893055	0.912383	0.73152	0.783269	pretrained
RLLISKLQDEFENR	3	12152	Acetyl:2H(3)@Any N-term;Acetyl:2H(3)@K	0;6	14	5004	5017	27	QE	0.877881	0.902637	0.716742	0.875736	pretrained
RVLQALEGLKMVEKDQDGGR	3	12187	Acetyl:2H(3)@Any N-term;Acetyl:2H(3)@K;Acetyl:2H(3)@K	0;10;14	20	5017	5036	27	QE	0.919285	0.933986	0.767388	0.737485	pretrained
RGSQGDSKQQNGPPR	3	12599	Acetyl:2H(3)@Any N-term;Acetyl:2H(3)@K	0;8	15	5036	5050	27	QE	0.775686	0.811599	0.602805	0.625291	pretrained
RGSQGDSKQQNGPPR	3	12609	Acetyl:2H(3)@Any N-term;Acetyl:2H(3)@K	0;8	15	5050	5064	27	QE	0.739535	0.777872	0.567402	0.480144	pretrained
RDHDNKQKSDDRGESER	4	12614	Acetyl:2H(3)@Any N-term;Acetyl:2H(3)@K;Acetyl:2H(3)@K	0;6;8	17	5064	5080	27	QE	0.874541	0.897002	0.708519	0.691163	pretrained
RRGVGADPEAR	3	12626	Acetyl:2H(3)@Any N-term	0	11	5080	5090	27	QE	0.868046	0.880817	0.686012	0.409099	pretrained
RRPSKKKR	3	12632	Acetyl:2H(3)@Any N-term;Acetyl:2H(3)@K;Acetyl:2H(3)@K;Acetyl:2H(3)@K	0;5;6;7	8	5090	5097	27	QE	0.718462	0.782959	0.572581	-0.0462507	pretrained
RRAAVEEKR	3	12638	Acetyl:2H(3)@Any N-term;Acetyl:2H(3)@K	0;8	9	5097	5105	27	QE	0.910489	0.930348	0.76099	0.516129	pretrained
RDDNSAANNSANEKER	3	12646	Acetyl:2H(3)@Any N-term;Acetyl:2H(3)@K	0;14	16	5105	5120	27	QE	0.921943	0.934047	0.767496	0.483051	pretrained
RREMAKEAKR	3	12661	Acetyl:2H(3)@Any N-term;Oxidation@M;Acetyl:2H(3)@K;Acetyl:2H(3)@K	0;4;6;9	10	5120	5129	27	QE	0.949938	0.95608	0.810623	0.478764	pretrained
RKKKEEQRR	3	12665	Acetyl:2H(3)@Any N-term;Acetyl:2H(3)@K;Acetyl:2H(3)@K;Acetyl:2H(3)@K	0;2;3;4	9	5129	5137	27	QE	0.868827	0.882516	0.688305	0.690066	pretrained
RRGKAEEQAVR	3	12670	Acetyl:2H(3)@Any N-term;Acetyl:2H(3)@K	0;4	11	5137	5147	27	QE	0.768893	0.807372	0.598222	0.587148	pretrained
RLQDHGKER	3	12681	Acetyl:2H(3)@Any N-term;Acetyl:2H(3)@K	0;7	9	5147	5155	27	QE	0.970171	0.973053	0.851874	0.647361	pretrained
RRPVAPATAAR	3	12689	Acetyl:2H(3)@Any N-term	0	11	5155	5165	27	QE	0.812175	0.835645	0.629812	0.136585	pretrained
RSKTKEAR	2	12721	Acetyl:2H(3)@Any N-term;Acetyl:2H(3)@K;Acetyl:2H(3)@K	0;3;5	8	5165	5172	27	QE	0.94812	0.950208	0.79826	0.704981	pretrained
RTGCIGAKHR	3	12730	Acetyl:2H(3)@Any N-term;Carbamidomethyl@C;Acetyl:2H(3)@K	0;4;8	10	5172	5181	27	QE	0.921819	0.936387	0.771704	0.548005	pretrained
RANGSVAPQER	2	12735	Acetyl:2H(3)@Any N-term	0	11	5181	5191	27	QE	0.88938	0.900695	0.713885	0.58621	pretrained
RTGCIGAKHR	3	12751	Acetyl:2H(3)@Any N-term;Carbamidomethyl@C;Acetyl:2H(3)@K	0;4;8	10	5191	5200	27	QE	0.954905	0.962243	0.824504	0.722651	pretrained
RKEKKR	2	12754	Acetyl:2H(3)@Any N-term;Acetyl:2H(3)@K;Acetyl:2H(3)@K;Acetyl:2H(3)@K	0;2;4;5	6	5200	5205	27	QE	0.851491	0.886329	0.693505	0.342105	pretrained
RQGGLAGSVRR	3	12772	Acetyl:2H(3)@Any N-term	0	11	5205	5215	27	QE	0.808316	0.836823	0.631179	0.190619	pretrained
RPPETKNR	2	12799	Acetyl:2H(3)@Any N-term;Acetyl:2H(3)@K	0;6	8	5215	5222	27	QE	0.881471	0.900684	0.713868	0.509031	pretrained
REQQPSVTSR	2	12811	Acetyl:2H(3)@Any N-term	0	10	5222	5231	27	QE	0.872642	0.891831	0.701158	0.31982	pretrained
RKEKSKR	2	12815	Acetyl:2H(3)@Any N-term;Acetyl:2H(3)@K;Acetyl:2H(3)@K;Acetyl:2H(3)@K	0;2;4;6	7	5231	5237	27	QE	0.9434	0.949673	0.79717	0.565217	pretrained
RDPSVKR	2	12817	Acetyl:2H(3)@Any N-term;Acetyl:2H(3)@K	0;6	7	5237	5243	27	QE	0.958788	0.967158	0.836391	0.574783	pretrained
RDHFEEAMR	3	12818	Acetyl:2H(3)@Any N-term;Oxidation@M	0;8	9	5243	5251	27	QE	0.893445	0.909578	0.72719	0.757331	pretrained
RKKEGPAR	2	12820	Acetyl:2H(3)@Any N-term;Acetyl:2H(3)@K;Acetyl:2H(3)@K	0;2;3	8	5251	5258	27	QE	0.840666	0.867909	0.669073	0.527094	pretrained
RRQQKLEKR	3	12832	Acetyl:2H(3)@Any N-term;Acetyl:2H(3)@K;Acetyl:2H(3)@K	0;5;8	9	5258	5266	27	QE	0.867719	0.888807	0.69693	0.396811	pretrained
RENKGATAAPQR	2	12859	Acetyl:2H(3)@Any N-term;Acetyl:2H(3)@K	0;4	12	5266	5277	27	QE	0.904568	0.917719	0.739942	0.652854	pretrained
RENKGATAAPQR	3	12868	Acetyl:2H(3)@Any N-term;Acetyl:2H(3)@K	0;4	12	5277	5288	27	QE	0.866109	0.891754	0.701049	0.757153	pretrained
RAGKAEQTGNKR	2	12870	Acetyl:2H(3)@Any N-term;Acetyl:2H(3)@K;Acetyl:2H(3)@K	0;4;11	12	5288	5299	27	QE	0.691594	0.75161	0.541445	0.348626	pretrained
RAGKAEQTGNKR	3	12871	Acetyl:2H(3)@Any N-term;Acetyl:2H(3)@K;Acetyl:2H(3)@K	0;4;11	12	5299	5310	27	QE	0.903473	0.920186	0.743926	0.625863	pretrained
RENKGATAAPQR	2	12896	Acetyl:2H(3)@Any N-term;Acetyl:2H(3)@K	0;4	12	5310	5321	27	QE	0.9167	0.929427	0.759396	0.734249	pretrained
RFQNAPR	2	12976	Acetyl:2H(3)@Any N-term	0	7	5321	5327	27	QE	0.126861	0.366331	0.238772	0.28	pretrained
RKSTLASR	2	12992	Acetyl:2H(3)@Any N-term;Acetyl:2H(3)@K	0;2	8	5327	5334	27	QE	0.876651	0.90167	0.715316	0.603448	pretrained
RSVEAPTERPGER	3	13043	Acetyl:2H(3)@Any N-term	0	13	5334	5346	27	QE	0.747673	0.784096	0.573746	0.354917	pretrained
RTVQQLR	2	13061	Acetyl:2H(3)@Any N-term	0	7	5346	5352	27	QE	0.95605	0.965551	0.832415	0.895217	pretrained
RPKTLR	2	13062	Acetyl:2H(3)@Any N-term;Acetyl:2H(3)@K	0;3	6	5352	5357	27	QE	0.800193	0.848803	0.645352	0.72782	pretrained
RNPADPQRIPSNPSHR	4	13091	Acetyl:2H(3)@Any N-term	0	16	5357	5372	27	QE	0.914592	0.927307	0.755765	0.575604	pretrained
RTIKKQR	2	13099	Acetyl:2H(3)@Any N-term;Acetyl:2H(3)@K;Acetyl:2H(3)@K	0;4;5	7	5372	5378	27	QE	0.721136	0.806838	0.597646	0.476087	pretrained
RPKTLR	2	13104	Acetyl:2H(3)@Any N-term;Acetyl:2H(3)@K	0;3	6	5378	5383	27	QE	0.813123	0.859534	0.658492	0.729323	pretrained
RQGGLAGSVR	2	13120	Acetyl:2H(3)@Any N-term	0	10	5383	5392	27	QE	0.96849	0.972346	0.849934	0.704247	pretrained
RFSEGTSADR	2	13143	Acetyl:2H(3)@Any N-term	0	10	5392	5401	27	QE	0.0737061	0.190895	0.122278	0.248906	pretrained
RLAESSKQDR	2	13182	Acetyl:2H(3)@Any N-term;Acetyl:2H(3)@K	0;7	10	5401	5410	27	QE	0.947332	0.954103	0.806375	0.363707	pretrained
RNEVLDR	2	13214	Acetyl:2H(3)@Any N-term	0	7	5410	5416	27	QE	0.944889	0.953241	0.804551	0.280435	pretrained
REQLVER	2	13215	Acetyl:2H(3)@Any N-term	0	7	5416	5422	27	QE	0.977441	0.980069	0.872683	0.972174	pretrained
RKEEAEQLRR	3	13223	Acetyl:2H(3)@Any N-term;Acetyl:2H(3)@K	0;2	10	5422	5431	27	QE	0.965325	0.971166	0.846751	0.80991	pretrained
RKVGNNLQR	2	13230	Acetyl:2H(3)@Any N-term;Acetyl:2H(3)@K	0;2	9	5431	5439	27	QE	0.887517	0.904374	0.719323	0.538306	pretrained
RNEVLDR	2	13232	Acetyl:2H(3)@Any N-term	0	7	5439	5445	27	QE	0.983658	0.985722	0.892292	0.90087	pretrained
RGKLDER	2	13244	Acetyl:2H(3)@Any N-term;Acetyl:2H(3)@K	0;3	7	5445	5451	27	QE	0.996392	0.996444	0.946294	0.897826	pretrained
RKMSQKGKR	2	13265	Acetyl:2H(3)@Any N-term;Acetyl:2H(3)@K;Acetyl:2H(3)@K;Acetyl:2H(3)@K	0;2;6;8	9	5451	5459	27	QE	0.924757	0.938454	0.775484	0.747067	pretrained
REDPISAGSR	2	13271	Acetyl:2H(3)@Any N-term	0	10	5459	5468	27	QE	0.95941	0.961329	0.822378	0.435779	pretrained
RRVNDAEPGSPEAPQGKR	3	13273	Acetyl:2H(3)@Any N-term;Acetyl:2H(3)@K	0;17	18	5468	5485	27	QE	0.93305	0.943136	0.784278	0.48349	pretrained
RMPPPPR	2	13281	Acetyl:2H(3)@Any N-term	0	7	5485	5491	27	QE	0.825067	0.881383	0.686773	0.730435	pretrained
RKTEEERQKKEDER	3	13283	Acetyl:2H(3)@Any N-term;Acetyl:2H(3)@K;Acetyl:2H(3)@K;Acetyl:2H(3)@K	0;2;9;10	14	5491	5504	27	QE	0.932343	0.933099	0.765812	0.482498	pretrained
REVELR	2	13293	Acetyl:2H(3)@Any N-term	0	6	5504	5509	27	QE	0.9539	0.965432	0.832124	0.984962	pretrained
RLEEAQKQR	2	13296	Acetyl:2H(3)@Any N-term;Acetyl:2H(3)@K	0;7	9	5509	5517	27	QE	0.912255	0.928872	0.758441	0.786474	pretrained
REVEKAKR	2	13313	Acetyl:2H(3)@Any N-term;Acetyl:2H(3)@K;Acetyl:2H(3)@K	0;5;7	8	5517	5524	27	QE	0.881219	0.908349	0.725313	0.652162	pretrained
RQLDEAKR	2	13321	Acetyl:2H(3)@Any N-term;Acetyl:2H(3)@K	0;7	8	5524	5531	27	QE	0.933769	0.950875	0.799626	0.78462	pretrained
RPEPKPDKSR	2	13331	Acetyl:2H(3)@Any N-term;Acetyl:2H(3)@K;Acetyl:2H(3)@K	0;5;8	10	5531	5540	27	QE	0.740888	0.801815	0.592264	0.542214	pretrained
RPEVDGVR	2	13332	Acetyl:2H(3)@Any N-term	0	8	5540	5547	27	QE	0.83764	0.874881	0.678121	0.743569	pretrained
RPEPKPDKSR	3	13341	Acetyl:2H(3)@Any N-term;Acetyl:2H(3)@K;Acetyl:2H(3)@K	0;5;8	10	5547	5556	27	QE	0.852512	0.872149	0.674548	0.771815	pretrained
RVGPSSGDAPEPSSR	2	13351	Acetyl:2H(3)@Any N-term	0	15	5556	5570	27	QE	0.981732	0.983447	0.884007	0.446582	pretrained
REVEKAKR	2	13364	Acetyl:2H(3)@Any N-term;Acetyl:2H(3)@K;Acetyl:2H(3)@K	0;5;7	8	5570	5577	27	QE	0.794993	0.845422	0.641302	0.600985	pretrained
RELEVR	2	13379	Acetyl:2H(3)@Any N-term	0	6	5577	5582	27	QE	0.966117	0.974241	0.85519	0.977444	pretrained
RGRGTGEAEEEYVGPR	3	13397	Acetyl:2H(3)@Any N-term	0	16	5582	5597	27	QE	0.810077	0.847039	0.643234	0.6212	pretrained
REYDEETVR	2	13406	Acetyl:2H(3)@Any N-term	0	9	5597	5605	27	QE	0.703271	0.719235	0.511015	0.151393	pretrained
RKTLSEETR	2	13407	Acetyl:2H(3)@Any N-term;Acetyl:2H(3)@K	0;2	9	5605	5613	27	QE	0.971476	0.972125	0.849334	0.769611	pretrained
RGKSGFNSKSGQR	2	13437	Acetyl:2H(3)@Any N-term;Acetyl:2H(3)@K;Acetyl:2H(3)@K	0;3;9	13	5613	5625	27	QE	0.830195	0.858051	0.656649	0.611431	pretrained
RGKSGFNSKSGQR	3	13438	Acetyl:2H(3)@Any N-term;Acetyl:2H(3)@K;Acetyl:2H(3)@K	0;3;9	13	5625	5637	27	QE	0.961621	0.966302	0.834262	0.418802	pretrained
RKAKELQQARR	3	13462	Acetyl:2H(3)@Any N-term;Acetyl:2H(3)@K;Acetyl:2H(3)@K	0;2;4	11	5637	5647	27	QE	0.899549	0.91307	0.73259	0.327017	pretrained
RKLEEQAR	2	13470	Acetyl:2H(3)@Any N-term;Acetyl:2H(3)@K	0;2	8	5647	5654	27	QE	0.951266	0.964761	0.830492	0.82266	pretrained
RDHFEEAMR	3	13487	Acetyl:2H(3)@Any N-term;Oxidation@M	0;8	9	5654	5662	27	QE	0.858167	0.880302	0.685321	0.685667	pretrained
RDHFEEAMR	3	13489	Acetyl:2H(3)@Any N-term	0	9	5662	5670	27	QE	0.94014	0.951528	0.800973	0.710044	pretrained
RGKSGFNSKSGQR	2	13498	Acetyl:2H(3)@Any N-term;Acetyl:2H(3)@K;Acetyl:2H(3)@K	0;3;9	13	5670	5682	27	QE	0.880722	0.883105	0.689102	0.611702	pretrained
RKLEEQAR	2	13513	Acetyl:2H(3)@Any N-term;Acetyl:2H(3)@K	0;2	8	5682	5689	27	QE	0.872877	0.880455	0.685525	0.665572	pretrained
RKSEEIQKR	2	13522	Acetyl:2H(3)@Any N-term;Acetyl:2H(3)@K;Acetyl:2H(3)@K	0;2;8	9	5689	5697	27	QE	0.961603	0.96936	0.842002	0.923204	pretrained
RGGPNYQEGLR	2	13524	Acetyl:2H(3)@Any N-term	0	11	5697	5707	27	QE	0.943901	0.943107	0.784223	0.344747	pretrained
RAPDQAAEIGSR	2	13529	Acetyl:2H(3)@Any N-term	0	12	5707	5718	27	QE	0.9077	0.923039	0.748605	0.485412	pretrained
REQLMREEAEQKR	3	13568	Acetyl:2H(3)@Any N-term;Oxidation@M;Acetyl:2H(3)@K	0;5;12	13	5718	5730	27	QE	0.903422	0.916147	0.737436	0.361539	pretrained
RLSYNTASNKTR	3	13597	Acetyl:2H(3)@Any N-term;Acetyl:2H(3)@K	0;10	12	5730	5741	27	QE	0.961643	0.967216	0.836536	0.59549	pretrained
RNAEQYKDQADKASTR	3	13607	Acetyl:2H(3)@Any N-term;Acetyl:2H(3)@K;Acetyl:2H(3)@K	0;7;12	16	5741	5756	27	QE	0.72109	0.771495	0.560982	0.147958	pretrained
RCESKKFGGPGAR	3	13609	Acetyl:2H(3)@Any N-term;Carbamidomethyl@C;Acetyl:2H(3)@K;Acetyl:2H(3)@K	0;2;5;6	13	5756	5768	27	QE	0.951207	0.956693	0.811959	0.537994	pretrained
RNEKIAVHCTVR	3	13642	Acetyl:2H(3)@Any N-term;Acetyl:2H(3)@K;Carbamidomethyl@C	0;4;9	12	5768	5779	27	QE	0.914143	0.932824	0.765327	0.812896	pretrained
RGGPNYQEGLR	2	13653	Acetyl:2H(3)@Any N-term	0	11	5779	5789	27	QE	0.915831	0.933826	0.767104	0.68227	pretrained
RNEPIKYQR	2	13689	Acetyl:2H(3)@Any N-term;Acetyl:2H(3)@K	0;6	9	5789	5797	27	QE	0.904881	0.921567	0.746181	0.479106	pretrained
RLLQER	2	13698	Acetyl:2H(3)@Any N-term	0	6	5797	5802	27	QE	0.974905	0.976002	0.860248	0.796241	pretrained
RGKGKSKGKGVGSAR	3	13700	Acetyl:2H(3)@Any N-term;Acetyl:2H(3)@K;Acetyl:2H(3)@K;Acetyl:2H(3)@K;Acetyl:2H(3)@K	0;3;5;7;9	15	5802	5816	27	QE	0.971421	0.974306	0.855375	0.6419	pretrained
RGKGKSKGKGVGSAR	2	13702	Acetyl:2H(3)@Any N-term;Acetyl:2H(3)@K;Acetyl:2H(3)@K;Acetyl:2H(3)@K;Acetyl:2H(3)@K	0;3;5;7;9	15	5816	5830	27	QE	0.569606	0.602404	0.411581	0.629323	pretrained
REEEMMIR	2	13711	Acetyl:2H(3)@Any N-term;Oxidation@M	0;5	8	5830	5837	27	QE	0.99062	0.990276	0.911147	0.575807	pretrained
RAEEQMLKER	2	13840	Acetyl:2H(3)@Any N-term;Oxidation@M;Acetyl:2H(3)@K	0;6;8	10	5837	5846	27	QE	0.962028	0.964231	0.829214	0.446976	pretrained
RRLNKHEENLKTKKQQR	4	13871	Acetyl:2H(3)@Any N-term;Acetyl:2H(3)@K;Acetyl:2H(3)@K;Acetyl:2H(3)@K;Acetyl:2H(3)@K	0;5;11;13;14	17	5846	5862	27	QE	0.124413	0.224505	0.144153	-0.208906	pretrained
RRLNKHEENLKTKKQQR	3	13874	Acetyl:2H(3)@Any N-term;Acetyl:2H(3)@K;Acetyl:2H(3)@K;Acetyl:2H(3)@K;Acetyl:2H(3)@K	0;5;11;13;14	17	5862	5878	27	QE	0.412775	0.489185	0.325411	0.132738	pretrained
RIIKETQR	2	13916	Acetyl:2H(3)@Any N-term;Acetyl:2H(3)@K	0;4	8	5878	5885	27	QE	0.889174	0.920088	0.743766	0.648331	pretrained
RLSYNTASNKTR	2	13949	Acetyl:2H(3)@Any N-term;Acetyl:2H(3)@K	0;10	12	5885	5896	27	QE	0.916315	0.923358	0.749134	0.500493	pretrained
RIIKETQR	2	13958	Acetyl:2H(3)@Any N-term;Acetyl:2H(3)@K	0;4	8	5896	5903	27	QE	0.948447	0.961164	0.821996	0.767926	pretrained
RLSYNTASNKTR	3	13960	Acetyl:2H(3)@Any N-term;Acetyl:2H(3)@K	0;10	12	5903	5914	27	QE	0.992095	0.993304	0.926286	0.996054	pretrained
RGDDSFGDKYRDR	3	14011	Acetyl:2H(3)@Any N-term;Acetyl:2H(3)@K	0;9	13	5914	5926	27	QE	0.821035	0.848498	0.644986	0.25977	pretrained
RIGDVVR	2	14028	Acetyl:2H(3)@Any N-term	0	7	5926	5932	27	QE	0.969318	0.97625	0.860976	0.673478	pretrained
REQLMREEAEQKR	3	14073	Acetyl:2H(3)@Any N-term;Acetyl:2H(3)@K	0;12	13	5932	5944	27	QE	0.863772	0.88726	0.694788	0.340046	pretrained
RDFQIR	2	14086	Acetyl:2H(3)@Any N-term	0	6	5944	5949	27	QE	0.950891	0.964662	0.830254	0.833835	pretrained
REQLMREEAEQKR	3	14088	Acetyl:2H(3)@Any N-term;Oxidation@M;Acetyl:2H(3)@K	0;5;12	13	5949	5961	27	QE	0.665879	0.707469	0.500326	0.262158	pretrained
RAQLPKYQR	2	14138	Acetyl:2H(3)@Any N-term;Acetyl:2H(3)@K	0;6	9	5961	5969	27	QE	0.895941	0.920328	0.744156	0.778226	pretrained
RITSDFR	2	14141	Acetyl:2H(3)@Any N-term	0	7	5969	5975	27	QE	0.993407	0.993934	0.929842	0.587826	pretrained
RDVYLSPR	2	14146	Acetyl:2H(3)@Any N-term	0	8	5975	5982	27	QE	0.938932	0.959079	0.817248	0.900383	pretrained
RQPKTPLEKR	2	14149	Acetyl:2H(3)@Any N-term;Acetyl:2H(3)@K;Acetyl:2H(3)@K	0;4;9	10	5982	5991	27	QE	0.806422	0.846019	0.642015	0.752896	pretrained
RRIQEKKDEDIAR	3	14158	Acetyl:2H(3)@Any N-term;Acetyl:2H(3)@K;Acetyl:2H(3)@K	0;6;7	13	5991	6003	27	QE	0.534731	0.612424	0.419611	0.223784	pretrained
RQYEEKNKEFER	3	14164	Acetyl:2H(3)@Any N-term;Acetyl:2H(3)@K;Acetyl:2H(3)@K	0;6;8	12	6003	6014	27	QE	0.910553	0.930107	0.760571	0.70444	pretrained
REEEGLQLR	2	14168	Acetyl:2H(3)@Any N-term	0	9	6014	6022	27	QE	0.955719	0.95659	0.811734	0.811584	pretrained
RGIEKLR	2	14175	Acetyl:2H(3)@Any N-term;Acetyl:2H(3)@K	0;5	7	6022	6028	27	QE	0.937404	0.95393	0.806007	0.615217	pretrained
RVEILNEHRGEKLNR	4	14189	Acetyl:2H(3)@Any N-term;Acetyl:2H(3)@K	0;12	15	6028	6042	27	QE	0.864884	0.87586	0.67941	0.837321	pretrained
RIPVSPEQAR	2	14220	Acetyl:2H(3)@Any N-term	0	10	6042	6051	27	QE	0.921862	0.938308	0.775214	0.635521	pretrained
RLESKIR	2	14222	Acetyl:2H(3)@Any N-term;Acetyl:2H(3)@K	0;5	7	6051	6057	27	QE	0.941014	0.956115	0.810698	0.603043	pretrained
RKEEKQQEANLKNR	2	14239	Acetyl:2H(3)@Any N-term;Acetyl:2H(3)@K;Acetyl:2H(3)@K;Acetyl:2H(3)@K	0;2;5;12	14	6057	6070	27	QE	0.741355	0.793895	0.583901	0.567959	pretrained
RKEEKQQEANLKNR	3	14242	Acetyl:2H(3)@Any N-term;Acetyl:2H(3)@K;Acetyl:2H(3)@K;Acetyl:2H(3)@K	0;2;5;12	14	6070	6083	27	QE	0.929325	0.940116	0.778566	0.558952	pretrained
RLQLVR	2	14268	Acetyl:2H(3)@Any N-term	0	6	6083	6088	27	QE	0.976726	0.981702	0.878027	0.798496	pretrained
RQLIVPPHLAHGESGAR	4	14282	Acetyl:2H(3)@Any N-term	0	17	6088	6104	27	QE	0.968315	0.973207	0.8523	0.808837	pretrained
RVGRRPDQQLQGEGKIIDR	4	14314	Acetyl:2H(3)@Any N-term;Acetyl:2H(3)@K	0;15	19	6104	6122	27	QE	0.930838	0.934068	0.767535	0.654222	pretrained
RNLSADQWR	2	14357	Acetyl:2H(3)@Any N-term	0	9	6122	6130	27	QE	0.7867	0.823671	0.616155	0.583761	pretrained
RNAEQYKDQADKASTR	3	14361	Acetyl:2H(3)@Any N-term;Acetyl:2H(3)@K;Acetyl:2H(3)@K	0;7;12	16	6130	6145	27	QE	0.852554	0.882582	0.688393	0.771575	pretrained
RLEELER	2	14366	Acetyl:2H(3)@Any N-term	0	7	6145	6151	27	QE	0.987249	0.990227	0.910926	0.837826	pretrained
REEEMMIR	2	14377	Acetyl:2H(3)@Any N-term	0	8	6151	6158	27	QE	0.977019	0.981206	0.876379	0.826765	pretrained
RTLEEKEQEEAR	2	14379	Acetyl:2H(3)@Any N-term;Acetyl:2H(3)@K	0;6	12	6158	6169	27	QE	0.955657	0.961807	0.823486	0.839605	pretrained
REEEMMIR	2	14382	Acetyl:2H(3)@Any N-term;Oxidation@M	0;6	8	6169	6176	27	QE	0.944915	0.948335	0.794467	0.385878	pretrained
RVCTTAGGVPVTRPPDDSTSAPR	3	14390	Acetyl:2H(3)@Any N-term;Carbamidomethyl@C	0;3	23	6176	6198	27	QE	0.889398	0.900533	0.713647	0.637896	pretrained
RGKVEQLSPEEEEKRR	3	14417	Acetyl:2H(3)@Any N-term;Acetyl:2H(3)@K;Acetyl:2H(3)@K	0;3;14	16	6198	6213	27	QE	0.794925	0.817766	0.609576	0.383718	pretrained
RTKTEISEMNRNISR	3	14425	Acetyl:2H(3)@Any N-term;Acetyl:2H(3)@K	0;3	15	6213	6227	27	QE	0.885305	0.900098	0.713011	0.683664	pretrained
RQEAPKVEEGLR	2	14432	Acetyl:2H(3)@Any N-term;Acetyl:2H(3)@K	0;6	12	6227	6238	27	QE	0.84903	0.872414	0.674893	0.448062	pretrained
RIALKKQR	2	14448	Acetyl:2H(3)@Any N-term;Acetyl:2H(3)@K;Acetyl:2H(3)@K	0;5;6	8	6238	6245	27	QE	0.839968	0.890388	0.699133	0.766557	pretrained
RVSEKEKESIAR	2	14466	Acetyl:2H(3)@Any N-term;Acetyl:2H(3)@K;Acetyl:2H(3)@K	0;5;7	12	6245	6256	27	QE	0.870473	0.896168	0.70732	0.507752	pretrained
RLAALQKR	2	14489	Acetyl:2H(3)@Any N-term;Acetyl:2H(3)@K	0;7	8	6256	6263	27	QE	0.940123	0.953911	0.805966	0.832239	pretrained
REKKAALEKEREER	3	14526	Acetyl:2H(3)@Any N-term;Acetyl:2H(3)@K;Acetyl:2H(3)@K;Acetyl:2H(3)@K	0;3;4;9	14	6263	6276	27	QE	0.740642	0.745781	0.535847	0.0416204	pretrained
REQQLAEIEAR	2	14581	Acetyl:2H(3)@Any N-term	0	11	6276	6286	27	QE	0.97931	0.983146	0.882953	0.940901	pretrained
RAEEQMLKER	2	14603	Acetyl:2H(3)@Any N-term;Acetyl:2H(3)@K	0;8	10	6286	6295	27	QE	0.954063	0.965684	0.832741	0.840541	pretrained
RILPKPTR	2	14659	Acetyl:2H(3)@Any N-term;Acetyl:2H(3)@K	0;5	8	6295	6302	27	QE	0.896918	0.914773	0.735262	0.657362	pretrained
RQKKLFCR	2	14715	Acetyl:2H(3)@Any N-term;Acetyl:2H(3)@K;Acetyl:2H(3)@K;Carbamidomethyl@C	0;3;4;7	8	6302	6309	27	QE	0.905902	0.930812	0.761797	0.782704	pretrained
RTEITIVKPQESAHR	3	14724	Acetyl:2H(3)@Any N-term;Acetyl:2H(3)@K	0;8	15	6309	6323	27	QE	0.951496	0.956945	0.812511	0.896582	pretrained
RKPDTIEVQQMKAQAR	2	14739	Acetyl:2H(3)@Any N-term;Acetyl:2H(3)@K;Oxidation@M;Acetyl:2H(3)@K	0;2;11;12	16	6323	6338	27	QE	0.942974	0.944697	0.787288	0.50903	pretrained
RKPDTIEVQQMKAQAR	3	14742	Acetyl:2H(3)@Any N-term;Acetyl:2H(3)@K;Oxidation@M;Acetyl:2H(3)@K	0;2;11;12	16	6338	6353	27	QE	0.916584	0.934298	0.767945	0.628702	pretrained
RVQTPLLR	2	14743	Acetyl:2H(3)@Any N-term	0	8	6353	6360	27	QE	0.985377	0.988253	0.902325	0.741653	pretrained
RAVIVKPVR	2	14788	Acetyl:2H(3)@Any N-term;Acetyl:2H(3)@K	0;6	9	6360	6368	27	QE	0.957427	0.966742	0.835352	0.772911	pretrained
RPQYSNPPVQGEVMEGADNQGAGEQGRPVRQNMYR	4	14824	Acetyl:2H(3)@Any N-term	0	35	6368	6402	27	QE	0.977527	0.977715	0.865348	0.770431	pretrained
RKEAPGPNGATEEDGVPSKVQR	3	14831	Acetyl:2H(3)@Any N-term;Acetyl:2H(3)@K;Acetyl:2H(3)@K	0;2;19	22	6402	6423	27	QE	0.898336	0.90252	0.71657	0.599929	pretrained
RTSMGGTQQQFVEGVR	2	14914	Acetyl:2H(3)@Any N-term	0	16	6423	6438	27	QE	0.9454	0.949753	0.797332	0.626146	pretrained
RVEEDIQQQKATGSEVSQR	3	14991	Acetyl:2H(3)@Any N-term;Acetyl:2H(3)@K	0;10	19	6438	6456	27	QE	0.951429	0.958582	0.816133	0.80994	pretrained
RSNVLTGLQDSSTDNR	2	15000	Acetyl:2H(3)@Any N-term	0	16	6456	6471	27	QE	0.961075	0.964651	0.830225	0.591414	pretrained
RSNVLTGLQDSSTDNR	2	15014	Acetyl:2H(3)@Any N-term	0	16	6471	6486	27	QE	0.805086	0.823441	0.615897	0.414671	pretrained
RGVVGPELYGR	2	15117	Acetyl:2H(3)@Any N-term	0	11	6486	6496	27	QE	0.92143	0.93798	0.774611	0.63743	pretrained
RLTPQAVKIR	2	15152	Acetyl:2H(3)@Any N-term;Acetyl:2H(3)@K	0;8	10	6496	6505	27	QE	0.908171	0.926653	0.754655	0.69704	pretrained
RLTPQAVKIR	3	15163	Acetyl:2H(3)@Any N-term;Acetyl:2H(3)@K	0;8	10	6505	6514	27	QE	0.969632	0.975146	0.857768	0.7139	pretrained
RYQKSTELLIR	3	15204	Acetyl:2H(3)@Any N-term;Acetyl:2H(3)@K	0;4	11	6514	6524	27	QE	0.914979	0.933861	0.767166	0.735647	pretrained
REDPSFERYPKNFSDSR	3	15232	Acetyl:2H(3)@Any N-term;Acetyl:2H(3)@K	0;11	17	6524	6540	27	QE	0.856611	0.86564	0.666177	0.390591	pretrained
RKTPEELLR	2	15247	Acetyl:2H(3)@Any N-term;Acetyl:2H(3)@K	0;2	9	6540	6548	27	QE	0.962099	0.970358	0.844608	0.708761	pretrained
RLPENLYNDR	2	15248	Acetyl:2H(3)@Any N-term	0	10	6548	6557	27	QE	0.960615	0.968217	0.839065	0.946461	pretrained
RKYKTIESETVR	2	15319	Acetyl:2H(3)@Any N-term;Acetyl:2H(3)@K;Acetyl:2H(3)@K	0;2;4	12	6557	6568	27	QE	0.865875	0.887671	0.695355	0.647921	pretrained
RLEESDVLQEAR	2	15355	Acetyl:2H(3)@Any N-term	0	12	6568	6579	27	QE	0.955	0.964423	0.829675	0.945807	pretrained
RQPQEEVVHEDQGKKPQDQLVIER	3	15460	Acetyl:2H(3)@Any N-term;Acetyl:2H(3)@K;Acetyl:2H(3)@K	0;14;15	24	6579	6602	27	QE	0.91703	0.907044	0.723333	0.22042	pretrained
RQPQEEVVHEDQGKKPQDQLVIER	4	15461	Acetyl:2H(3)@Any N-term;Acetyl:2H(3)@K;Acetyl:2H(3)@K	0;14;15	24	6602	6625	27	QE	0.894679	0.900945	0.714251	0.338609	pretrained
RWDQGLEKPR	2	15479	Acetyl:2H(3)@Any N-term;Acetyl:2H(3)@K	0;8	10	6625	6634	27	QE	0.314929	0.424427	0.279049	0.138739	pretrained
RTNSTFNQVVLKR	2	15484	Acetyl:2H(3)@Any N-term;Acetyl:2H(3)@K	0;12	13	6634	6646	27	QE	0.899039	0.912508	0.731714	0.648176	pretrained
RQQDANKETQLLEKER	3	15533	Acetyl:2H(3)@Any N-term;Acetyl:2H(3)@K;Acetyl:2H(3)@K	0;7;14	16	6646	6661	27	QE	0.871386	0.898103	0.710109	0.86813	pretrained
RAALEAAAAAAPER	2	15549	Acetyl:2H(3)@Any N-term	0	14	6661	6674	27	QE	0.95348	0.95846	0.815862	0.632204	pretrained
RAALEAAAAAAPER	3	15554	Acetyl:2H(3)@Any N-term	0	14	6674	6687	27	QE	0.981489	0.984858	0.889072	0.716426	pretrained
RQEQIQAMPLADSQAVR	3	15574	Acetyl:2H(3)@Any N-term	0	17	6687	6703	27	QE	0.982782	0.985111	0.890005	0.914171	pretrained
RQEQIQAMPLADSQAVR	2	15581	Acetyl:2H(3)@Any N-term	0	17	6703	6719	27	QE	0.99038	0.991065	0.914834	0.571016	pretrained
RAEVSPKGLQTPVKDAGGGTGR	3	15586	Acetyl:2H(3)@Any N-term;Acetyl:2H(3)@K;Acetyl:2H(3)@K	0;7;14	22	6719	6740	27	QE	0.959712	0.964862	0.830736	0.653539	pretrained
RKTGKEMLDYKR	3	15627	Acetyl:2H(3)@Any N-term;Acetyl:2H(3)@K;Acetyl:2H(3)@K;Acetyl:2H(3)@K	0;2;5;11	12	6740	6751	27	QE	0.892504	0.911567	0.730253	0.819168	pretrained
RVNAIEHVIIPR	3	15669	Acetyl:2H(3)@Any N-term	0	12	6751	6762	27	QE	0.948454	0.95809	0.815038	0.932347	pretrained
RALLSLR	2	15678	Acetyl:2H(3)@Any N-term	0	7	6762	6768	27	QE	0.981171	0.985477	0.89137	0.914783	pretrained
RRVVLVNNILQNAQER	3	15682	Acetyl:2H(3)@Any N-term	0	16	6768	6783	27	QE	0.938687	0.948347	0.794492	0.771298	pretrained
RFELLSR	2	15710	Acetyl:2H(3)@Any N-term	0	7	6783	6789	27	QE	0.972571	0.980688	0.874684	0.792609	pretrained
RLETLLR	2	15731	Acetyl:2H(3)@Any N-term	0	7	6789	6795	27	QE	0.988903	0.991366	0.916284	0.915652	pretrained
RATLDQVATLER	2	15739	Acetyl:2H(3)@Any N-term	0	12	6795	6806	27	QE	0.903709	0.918898	0.741839	0.779845	pretrained
RKPDTIEVQQMKAQAR	3	15826	Acetyl:2H(3)@Any N-term;Acetyl:2H(3)@K;Acetyl:2H(3)@K	0;2;12	16	6806	6821	27	QE	0.94823	0.958731	0.816468	0.660795	pretrained
RLSELLR	2	15827	Acetyl:2H(3)@Any N-term	0	7	6821	6827	27	QE	0.98011	0.984366	0.887279	0.770435	pretrained
RKPDTIEVQQMKAQAR	2	15829	Acetyl:2H(3)@Any N-term;Acetyl:2H(3)@K;Acetyl:2H(3)@K	0;2;12	16	6827	6842	27	QE	0.8696	0.872195	0.674608	0.398638	pretrained
RYQKSTELLIR	2	15839	Acetyl:2H(3)@Any N-term;Acetyl:2H(3)@K	0;4	11	6842	6852	27	QE	0.984146	0.986523	0.895365	0.728799	pretrained
RGWVTFDR	2	15844	Acetyl:2H(3)@Any N-term	0	8	6852	6859	27	QE	0.983774	0.986358	0.894725	0.601806	pretrained
RKPDTIEVQQMKAQAR	3	15845	Acetyl:2H(3)@Any N-term;Acetyl:2H(3)@K;Oxidation@M;Acetyl:2H(3)@K	0;2;11;12	16	6859	6874	27	QE	0.842997	0.871059	0.673132	0.605224	pretrained
RKPDTIEVQQMKAQAR	2	15865	Acetyl:2H(3)@Any N-term;Acetyl:2H(3)@K;Oxidation@M;Acetyl:2H(3)@K	0;2;11;12	16	6874	6889	27	QE	0.852179	0.861531	0.660988	0.923729	pretrained
RLSELLR	2	15886	Acetyl:2H(3)@Any N-term	0	7	6889	6895	27	QE	0.966481	0.972043	0.849112	0.755217	pretrained
RQFHLTDDDLLR	3	15993	Acetyl:2H(3)@Any N-term	0	12	6895	6906	27	QE	0.710826	0.77099	0.560476	0.670825	pretrained
REEDAEKAVIDLNNR	3	16030	Acetyl:2H(3)@Any N-term;Acetyl:2H(3)@K	0;7	15	6906	6920	27	QE	0.917691	0.931465	0.762937	0.767498	pretrained
RLMKELEEIR	2	16146	Acetyl:2H(3)@Any N-term;Oxidation@M;Acetyl:2H(3)@K	0;3;4	10	6920	6929	27	QE	0.972363	0.974554	0.856076	0.692407	pretrained
RLKTLLVNNNR	2	16197	Acetyl:2H(3)@Any N-term;Acetyl:2H(3)@K	0;3	11	6929	6939	27	QE	0.92293	0.928267	0.757402	0.55	pretrained
RLMKELEEIR	2	16228	Acetyl:2H(3)@Any N-term;Oxidation@M;Acetyl:2H(3)@K	0;3;4	10	6939	6948	27	QE	0.980721	0.982671	0.881312	0.341184	pretrained
RFGDKLNFR	2	16281	Acetyl:2H(3)@Any N-term;Acetyl:2H(3)@K	0;5	9	6948	6956	27	QE	0.861339	0.886801	0.694156	0.679985	pretrained
RKKKEYVKCLENR	3	16362	Acetyl:2H(3)@Any N-term;Acetyl:2H(3)@K;Acetyl:2H(3)@K;Acetyl:2H(3)@K;Acetyl:2H(3)@K;Carbamidomethyl@C	0;2;3;4;8;9	13	6956	6968	27	QE	0.824659	0.848682	0.645207	0.540002	pretrained
RPIQVMMMGSAR	2	16378	Acetyl:2H(3)@Any N-term	0	12	6968	6979	27	QE	0.872997	0.895359	0.706161	0.699577	pretrained
RQLFLPSMR	2	16433	Acetyl:2H(3)@Any N-term	0	9	6979	6987	27	QE	0.879083	0.899441	0.712053	0.592009	pretrained
RGDLPFVVPR	2	16485	Acetyl:2H(3)@Any N-term	0	10	6987	6996	27	QE	0.910819	0.932198	0.764223	0.66435	pretrained
RGDLPFVVPR	2	16515	Acetyl:2H(3)@Any N-term	0	10	6996	7005	27	QE	0.925596	0.944033	0.786003	0.736808	pretrained
RQEIEQKLEVQAEEER	3	16537	Acetyl:2H(3)@Any N-term;Acetyl:2H(3)@K	0;7	16	7005	7020	27	QE	0.823724	0.860555	0.659767	0.776271	pretrained
RGDLPFVVPR	2	16540	Acetyl:2H(3)@Any N-term	0	10	7020	7029	27	QE	0.881215	0.911223	0.729722	0.738867	pretrained
RQEIEQKLEVQAEEER	2	16541	Acetyl:2H(3)@Any N-term;Acetyl:2H(3)@K	0;7	16	7029	7044	27	QE	0.878105	0.896664	0.708033	0.740761	pretrained
RDPTLLVSVVR	2	16568	Acetyl:2H(3)@Any N-term	0	11	7044	7054	27	QE	0.900228	0.915977	0.737165	0.714353	pretrained
RQEIEQKLEVQAEEER	3	16576	Acetyl:2H(3)@Any N-term;Acetyl:2H(3)@K	0;7	16	7054	7069	27	QE	0.740028	0.79622	0.58634	0.731898	pretrained
RLSEDYGVLKTDEGIAYR	3	16600	Acetyl:2H(3)@Any N-term;Acetyl:2H(3)@K	0;10	18	7069	7086	27	QE	0.931462	0.941843	0.781816	0.681338	pretrained
RKIMSSPLSKELR	3	16668	Acetyl:2H(3)@Any N-term;Acetyl:2H(3)@K;Acetyl:2H(3)@K	0;2;10	13	7086	7098	27	QE	0.911267	0.925738	0.75311	0.652681	pretrained
RGDLPFVVPR	2	16680	Acetyl:2H(3)@Any N-term	0	10	7098	7107	27	QE	0.888344	0.897305	0.708957	0.679151	pretrained
RPVHGESDTEQLQDDDIETTKVEMLR	3	16747	Acetyl:2H(3)@Any N-term;Acetyl:2H(3)@K	0;21	26	7107	7132	27	QE	0.865378	0.888098	0.695947	0.568065	pretrained
RIDWEKLENR	2	16766	Acetyl:2H(3)@Any N-term;Acetyl:2H(3)@K	0;6	10	7132	7141	27	QE	0.895081	0.919694	0.743127	0.926641	pretrained
RVVSEIPVLKTNAGPR	3	16769	Acetyl:2H(3)@Any N-term;Acetyl:2H(3)@K	0;10	16	7141	7156	27	QE	0.982986	0.985393	0.891054	0.805418	pretrained
RVVSEIPVLKTNAGPR	2	16771	Acetyl:2H(3)@Any N-term;Acetyl:2H(3)@K	0;10	16	7156	7171	27	QE	0.808573	0.828538	0.621654	0.034454	pretrained
RIDWEKLENR	3	16777	Acetyl:2H(3)@Any N-term;Acetyl:2H(3)@K	0;6	10	7171	7180	27	QE	0.977883	0.982768	0.881643	0.846461	pretrained
RAEDGSVIDYELIDQDAR	2	16812	Acetyl:2H(3)@Any N-term	0	18	7180	7197	27	QE	0.926013	0.936972	0.772768	0.700729	pretrained
RAEDGSVIDYELIDQDAR	3	16816	Acetyl:2H(3)@Any N-term	0	18	7197	7214	27	QE	0.952889	0.961431	0.822614	0.764591	pretrained
RAEDGSVIDYELIDQDAR	2	16897	Acetyl:2H(3)@Any N-term	0	18	7214	7231	27	QE	0.990685	0.991938	0.919106	0.718632	pretrained
RAEDGSVIDYELIDQDAR	3	16899	Acetyl:2H(3)@Any N-term	0	18	7231	7248	27	QE	0.983179	0.986229	0.894225	0.887659	pretrained
RAPEEELPPLDPEEIR	2	16901	Acetyl:2H(3)@Any N-term	0	16	7248	7263	27	QE	0.994415	0.994575	0.933656	0.699166	pretrained
RYGELTKLIR	2	16906	Acetyl:2H(3)@Any N-term;Acetyl:2H(3)@K	0;7	10	7263	7272	27	QE	0.957385	0.965176	0.831498	0.539511	pretrained
RAPEEELPPLDPEEIR	3	16916	Acetyl:2H(3)@Any N-term	0	16	7272	7287	27	QE	0.933203	0.94191	0.781942	0.743318	pretrained
RAEDGSVIDYELIDQDAR	2	16948	Acetyl:2H(3)@Any N-term	0	18	7287	7304	27	QE	0.993412	0.994217	0.931504	0.699431	pretrained
RAEDGSVIDYELIDQDAR	3	16961	Acetyl:2H(3)@Any N-term	0	18	7304	7321	27	QE	0.964469	0.971071	0.846498	0.825533	pretrained
RAEDGSVIDYELIDQDAR	2	17054	Acetyl:2H(3)@Any N-term	0	18	7321	7338	27	QE	0.930225	0.938933	0.776368	0.754476	pretrained
RKGGLDYLKQVENETR	3	17171	Acetyl:2H(3)@Any N-term;Acetyl:2H(3)@K;Acetyl:2H(3)@K	0;2;9	16	7338	7353	27	QE	0.873288	0.893267	0.703186	0.742262	pretrained
RYADLTEDQLPSCESLKDTIAR	3	17232	Acetyl:2H(3)@Any N-term;Carbamidomethyl@C;Acetyl:2H(3)@K	0;13;17	22	7353	7374	27	QE	0.977212	0.980393	0.873725	0.710216	pretrained
RAPFDLFENR	2	17253	Acetyl:2H(3)@Any N-term	0	10	7374	7383	27	QE	0.955912	0.966334	0.834341	0.932819	pretrained
RAPFDLFENR	2	17309	Acetyl:2H(3)@Any N-term	0	10	7383	7392	27	QE	0.851595	0.883551	0.689709	0.722522	pretrained
RAMKTVFGVEPDLTR	3	17530	Acetyl:2H(3)@Any N-term;Acetyl:2H(3)@K	0;4	15	7392	7406	27	QE	0.889578	0.907246	0.723638	0.673753	pretrained
RLMKELEEIR	2	17541	Acetyl:2H(3)@Any N-term;Acetyl:2H(3)@K	0;4	10	7406	7415	27	QE	0.93572	0.942248	0.782584	0.817375	pretrained
RLMKELEEIR	3	17558	Acetyl:2H(3)@Any N-term;Acetyl:2H(3)@K	0;4	10	7415	7424	27	QE	0.944253	0.957571	0.813888	0.777735	pretrained
RLMKELEEIR	2	17592	Acetyl:2H(3)@Any N-term;Acetyl:2H(3)@K	0;4	10	7424	7433	27	QE	0.972309	0.973655	0.853545	0.80592	pretrained
RFSDQFPLPLKER	2	17610	Acetyl:2H(3)@Any N-term;Acetyl:2H(3)@K	0;11	13	7433	7445	27	QE	0.791649	0.822625	0.614982	0.653821	pretrained
RFSDQFPLPLKER	3	17616	Acetyl:2H(3)@Any N-term;Acetyl:2H(3)@K	0;11	13	7445	7457	27	QE	0.965937	0.969965	0.843577	0.49061	pretrained
RLQQTQAQVDEVVDIMR	3	17651	Acetyl:2H(3)@Any N-term	0	17	7457	7473	27	QE	0.981714	0.985667	0.892085	0.814927	pretrained
RLQQTQAQVDEVVDIMR	2	17656	Acetyl:2H(3)@Any N-term	0	17	7473	7489	27	QE	0.896226	0.90935	0.72684	0.485554	pretrained
RLQQTQAQVDEVVDIMR	3	17659	Acetyl:2H(3)@Any N-term	0	17	7489	7505	27	QE	0.98116	0.985589	0.89179	0.869437	pretrained
RTEKKLKDVLLQVDDERR	3	17695	Acetyl:2H(3)@Any N-term;Acetyl:2H(3)@K;Acetyl:2H(3)@K;Acetyl:2H(3)@K	0;4;5;7	18	7505	7522	27	QE	0.850208	0.873831	0.676744	0.138031	pretrained
RMPGQCSVLLFPGQGSQVVGMGR	3	17729	Acetyl:2H(3)@Any N-term;Carbamidomethyl@C	0;6	23	7522	7544	27	QE	0.962186	0.966619	0.835047	0.811657	pretrained
RKGLAFLDELR	2	17890	Acetyl:2H(3)@Any N-term;Acetyl:2H(3)@K	0;2	11	7544	7554	27	QE	0.942286	0.950583	0.799027	0.845779	pretrained
RGMFPDNFVKEIKR	2	18030	Acetyl:2H(3)@Any N-term;Acetyl:2H(3)@K;Acetyl:2H(3)@K	0;10;13	14	7554	7567	27	QE	0.913724	0.925044	0.751944	0.32084	pretrained
RQLLLQKLLQR	2	18066	Acetyl:2H(3)@Any N-term;Acetyl:2H(3)@K	0;7	11	7567	7577	27	QE	0.945653	0.954763	0.807783	0.677298	pretrained
RQLLLQKLLQR	3	18072	Acetyl:2H(3)@Any N-term;Acetyl:2H(3)@K	0;7	11	7577	7587	27	QE	0.970966	0.977947	0.866055	0.887617	pretrained
RDVDFELIKVEGKVGGR	3	18164	Acetyl:2H(3)@Any N-term;Acetyl:2H(3)@K;Acetyl:2H(3)@K	0;9;13	17	7587	7603	27	QE	0.943354	0.951934	0.801815	0.651282	pretrained
RAASGYPVKVPLEVQEADEAKLQQTEAELR	3	18184	Acetyl:2H(3)@Any N-term;Acetyl:2H(3)@K;Acetyl:2H(3)@K	0;9;21	30	7603	7632	27	QE	0.819951	0.840685	0.635695	0.208872	pretrained
RFDEILEASDGIMVAR	2	18190	Acetyl:2H(3)@Any N-term	0	16	7632	7647	27	QE	0.971175	0.975537	0.858897	0.759906	pretrained
RAASGYPVKVPLEVQEADEAKLQQTEAELR	4	18198	Acetyl:2H(3)@Any N-term;Acetyl:2H(3)@K;Acetyl:2H(3)@K	0;9;21	30	7647	7676	27	QE	0.71913	0.747657	0.537643	0.452405	pretrained
RVYATILNAGTNTDGFKEQGVTFPSGDIQEQLIR	4	18203	Acetyl:2H(3)@Any N-term;Acetyl:2H(3)@K	0;17	34	7676	7709	27	QE	0.972878	0.974977	0.857283	0.688481	pretrained
RQQLEEQTVELSTEVQSLYR	3	18275	Acetyl:2H(3)@Any N-term	0	20	7709	7728	27	QE	0.982913	0.986701	0.89606	0.802365	pretrained
RAEDGSVIDYELIDQDARDLYDAGVKR	4	18276	Acetyl:2H(3)@Any N-term;Acetyl:2H(3)@K	0;26	27	7728	7754	27	QE	0.427505	0.502834	0.335418	0.214238	pretrained
RQPNISVMQSPLVGVTSTPGTGQSMFSPASIGQPR	3	18283	Acetyl:2H(3)@Any N-term	0	35	7754	7788	27	QE	0.969815	0.97356	0.853281	0.831866	pretrained
RTEKKLKDVLLQVDDER	3	18302	Acetyl:2H(3)@Any N-term;Acetyl:2H(3)@K;Acetyl:2H(3)@K;Acetyl:2H(3)@K	0;4;5;7	17	7788	7804	27	QE	0.736371	0.785997	0.5757	0.386905	pretrained
RLGPLLLDPSLAVR	2	18346	Acetyl:2H(3)@Any N-term	0	14	7804	7817	27	QE	0.9955	0.995496	0.939557	0.734995	pretrained
RKPTRLELKLDDIEEFENIR	3	18352	Acetyl:2H(3)@Any N-term;Acetyl:2H(3)@K;Acetyl:2H(3)@K	0;2;9	20	7817	7836	27	QE	0.54659	0.611695	0.419024	0.340342	pretrained
REALEKTEKQLEAIDQLHLEYAKR	4	18541	Acetyl:2H(3)@Any N-term;Acetyl:2H(3)@K;Acetyl:2H(3)@K;Acetyl:2H(3)@K	0;6;9;23	24	7836	7859	27	QE	0.820702	0.85537	0.65334	0.383498	pretrained
RTEKKLKDVLLQVDDER	3	18550	Acetyl:2H(3)@Any N-term;Acetyl:2H(3)@K;Acetyl:2H(3)@K;Acetyl:2H(3)@K	0;4;5;7	17	7859	7875	27	QE	0.807029	0.841927	0.637157	0.403251	pretrained
RLQEALAAKEAADAELGQLR	3	18551	Acetyl:2H(3)@Any N-term;Acetyl:2H(3)@K	0;9	20	7875	7894	27	QE	0.956383	0.962959	0.826185	0.6765	pretrained
REALEKTEKQLEAIDQLHLEYAKR	3	18570	Acetyl:2H(3)@Any N-term;Acetyl:2H(3)@K;Acetyl:2H(3)@K;Acetyl:2H(3)@K	0;6;9;23	24	7894	7917	27	QE	0.795496	0.830979	0.624438	0.238683	pretrained
RAASGYPVKVPLEVQEADEAKLQQTEAELR	3	18571	Acetyl:2H(3)@Any N-term;Acetyl:2H(3)@K;Acetyl:2H(3)@K	0;9;21	30	7917	7946	27	QE	0.823162	0.843512	0.639032	0.272222	pretrained
RVDAENRLQTMKEELDFQKNIYSEELR	3	18658	Acetyl:2H(3)@Any N-term;Acetyl:2H(3)@K;Acetyl:2H(3)@K	0;12;19	27	7946	7972	27	QE	0.636702	0.669454	0.466944	0.512035	pretrained
RIVSQLLTLMDGLKQR	3	18688	Acetyl:2H(3)@Any N-term;Oxidation@M;Acetyl:2H(3)@K	0;10;14	16	7972	7987	27	QE	0.856165	0.883722	0.689941	0.505279	pretrained
RGKNVVHQLSVTLEDLYNGATR	4	18694	Acetyl:2H(3)@Any N-term;Acetyl:2H(3)@K	0;3	22	7987	8008	27	QE	0.885311	0.897869	0.709771	0.771651	pretrained
RAEQDSTTVAAFASSLVSGLNSSASEPAKEPAKKSR	4	18806	Acetyl:2H(3)@Any N-term;Acetyl:2H(3)@K;Acetyl:2H(3)@K;Acetyl:2H(3)@K	0;29;33;34	36	8008	8043	27	QE	0.556525	0.609219	0.417034	0.0803766	pretrained
REDIVDTMVFKPSDVMLVHFR	3	18864	Acetyl:2H(3)@Any N-term;Acetyl:2H(3)@K	0;11	21	8043	8063	27	QE	0.94651	0.949087	0.795982	0.76274	pretrained
RVLQALEGLKMVEKDQDGGR	3	18893	Acetyl:2H(3)@Any N-term;Acetyl:2H(3)@K;Acetyl:2H(3)@K	0;10;14	20	8063	8082	27	QE	0.876556	0.899727	0.712469	0.795407	pretrained
RLLISKLQDEFENR	3	18935	Acetyl:2H(3)@Any N-term;Acetyl:2H(3)@K	0;6	14	8082	8095	27	QE	0.881992	0.906063	0.721853	0.82545	pretrained
RVPVLGSLLNLPGIR	2	18963	Acetyl:2H(3)@Any N-term	0	15	8095	8109	27	QE	0.935702	0.945872	0.789581	0.577409	pretrained
RVPVLGSLLNLPGIR	3	18970	Acetyl:2H(3)@Any N-term	0	15	8109	8123	27	QE	0.983958	0.98663	0.895782	0.741319	pretrained
RRPSKKKR	3	19481	Acetyl:2H(3)@Any N-term;Acetyl:2H(3)@K;Acetyl:2H(3)@K;Acetyl:2H(3)@K	0;5;6;7	8	8123	8130	27	QE	0.704064	0.772961	0.56245	-0.109743	pretrained
RAANEDPDEKRR	3	19543	Acetyl:2H(3)@Any N-term;Acetyl:2H(3)@K	0;10	12	8130	8141	27	QE	0.944866	0.948811	0.795424	0.49852	pretrained
RRKEQLER	3	19549	Acetyl:2H(3)@Any N-term;Acetyl:2H(3)@K	0;3	8	8141	8148	27	QE	0.86157	0.885605	0.692512	0.730159	pretrained
RDDNSAANNSANEKER	3	19555	Acetyl:2H(3)@Any N-term;Acetyl:2H(3)@K	0;14	16	8148	8163	27	QE	0.532124	0.585794	0.398434	0.041317	pretrained
RPRPTPGDGEKR	3	19565	Acetyl:2H(3)@Any N-term;Acetyl:2H(3)@K	0;11	12	8163	8174	27	QE	0.724837	0.776494	0.566007	0.792107	pretrained
RQLQEQQR	2	19566	Acetyl:2H(3)@Any N-term	0	8	8174	8181	27	QE	0.920664	0.94762	0.793038	0.965517	pretrained
RQSEDPSCPNER	2	19575	Acetyl:2H(3)@Any N-term;Carbamidomethyl@C	0;8	12	8181	8192	27	QE	0.980992	0.982267	0.879932	0.383791	pretrained
RTGCIGAKHR	3	19577	Acetyl:2H(3)@Any N-term;Carbamidomethyl@C;Acetyl:2H(3)@K	0;4;8	10	8192	8201	27	QE	0.910702	0.927332	0.755807	0.600772	pretrained
RGKNENESEKR	2	19582	Acetyl:2H(3)@Any N-term;Acetyl:2H(3)@K;Acetyl:2H(3)@K	0;3;10	11	8201	8211	27	QE	0.90152	0.915884	0.737018	0.372983	pretrained
RGKNENESEKR	3	19584	Acetyl:2H(3)@Any N-term;Acetyl:2H(3)@K;Acetyl:2H(3)@K	0;3;10	11	8211	8221	27	QE	0.860258	0.888229	0.696128	0.259287	pretrained
RHQAIGEKEAR	3	19593	Acetyl:2H(3)@Any N-term;Acetyl:2H(3)@K	0;8	11	8221	8231	27	QE	0.855886	0.888356	0.696304	0.754597	pretrained
RVPEEASTNRR	3	19605	Acetyl:2H(3)@Any N-term	0	11	8231	8241	27	QE	0.840922	0.873039	0.675709	0.461445	pretrained
RQMQDAAGR	2	19614	Acetyl:2H(3)@Any N-term	0	9	8241	8249	27	QE	0.931956	0.945096	0.788065	0.562317	pretrained
RPRGEDGKPVR	3	19627	Acetyl:2H(3)@Any N-term;Acetyl:2H(3)@K	0;8	11	8249	8259	27	QE	0.862461	0.879149	0.683776	0.35591	pretrained
RNKTHTLCR	3	19629	Acetyl:2H(3)@Any N-term;Acetyl:2H(3)@K;Carbamidomethyl@C	0;3;8	9	8259	8267	27	QE	0.918795	0.926363	0.754164	0.653959	pretrained
RDRDGYSYGSR	3	19632	Acetyl:2H(3)@Any N-term	0	11	8267	8277	27	QE	0.908633	0.92924	0.759074	0.72636	pretrained
RKYSCDR	2	19658	Acetyl:2H(3)@Any N-term;Acetyl:2H(3)@K;Carbamidomethyl@C	0;2;5	7	8277	8283	27	QE	0.953236	0.961037	0.821703	0.663043	pretrained
RKEKSKR	2	19668	Acetyl:2H(3)@Any N-term;Acetyl:2H(3)@K;Acetyl:2H(3)@K;Acetyl:2H(3)@K	0;2;4;6	7	8283	8289	27	QE	0.959864	0.964928	0.830896	0.557391	pretrained
REQQPSVTSR	2	19670	Acetyl:2H(3)@Any N-term	0	10	8289	8298	27	QE	0.933629	0.939299	0.777046	0.559974	pretrained
RDPNNYRPR	3	19681	Acetyl:2H(3)@Any N-term	0	9	8298	8306	27	QE	0.910194	0.924632	0.751254	0.158724	pretrained
RAVSPSNPKAR	3	19691	Acetyl:2H(3)@Any N-term;Acetyl:2H(3)@K	0;9	11	8306	8316	27	QE	0.654445	0.705824	0.498847	0.513321	pretrained
RVEEEKR	2	19699	Acetyl:2H(3)@Any N-term;Acetyl:2H(3)@K	0;6	7	8316	8322	27	QE	0.95722	0.968613	0.840077	0.898261	pretrained
RMEELHNQEMQKR	3	19702	Acetyl:2H(3)@Any N-term;Oxidation@M;Oxidation@M;Acetyl:2H(3)@K	0;2;10;12	13	8322	8334	27	QE	0.570528	0.662226	0.460776	0.448437	pretrained
RENKGATAAPQR	2	19721	Acetyl:2H(3)@Any N-term;Acetyl:2H(3)@K	0;4	12	8334	8345	27	QE	0.831011	0.842672	0.638038	0.416631	pretrained
RDYDDMSPR	3	19727	Acetyl:2H(3)@Any N-term;Oxidation@M	0;6	9	8345	8353	27	QE	0.79315	0.840455	0.635425	0.670821	pretrained
RLGPGGAAR	2	19753	Acetyl:2H(3)@Any N-term	0	9	8353	8361	27	QE	0.931316	0.941368	0.780918	0.696481	pretrained
RADKKPAR	2	19759	Acetyl:2H(3)@Any N-term;Acetyl:2H(3)@K;Acetyl:2H(3)@K	0;4;5	8	8361	8368	27	QE	0.972206	0.977997	0.866208	0.802408	pretrained
RATIKR	2	19810	Acetyl:2H(3)@Any N-term;Acetyl:2H(3)@K	0;5	6	8368	8373	27	QE	0.901956	0.922903	0.74838	0.885714	pretrained
RSASASHQADIKEAR	3	19875	Acetyl:2H(3)@Any N-term;Acetyl:2H(3)@K	0;12	15	8373	8387	27	QE	0.9573	0.96452	0.82991	0.705605	pretrained
RRQEKWQQEQER	3	19950	Acetyl:2H(3)@Any N-term;Acetyl:2H(3)@K	0;5	12	8387	8398	27	QE	0.864132	0.88273	0.688594	0.602396	pretrained
RQGGLAGSVR	2	19951	Acetyl:2H(3)@Any N-term	0	10	8398	8407	27	QE	0.9653	0.964674	0.830282	0.439254	pretrained
RKKLQQR	2	20035	Acetyl:2H(3)@Any N-term;Acetyl:2H(3)@K;Acetyl:2H(3)@K	0;2;3	7	8407	8413	27	QE	0.896864	0.926866	0.755016	0.636087	pretrained
RTDVGAGALRR	3	20049	Acetyl:2H(3)@Any N-term	0	11	8413	8423	27	QE	0.902526	0.920306	0.74412	0.596248	pretrained
RAKVYGR	2	20056	Acetyl:2H(3)@Any N-term;Acetyl:2H(3)@K	0;3	7	8423	8429	27	QE	0.922079	0.944906	0.787695	0.77087	pretrained
RRLSYNTASNKTR	3	20059	Acetyl:2H(3)@Any N-term;Acetyl:2H(3)@K	0;11	13	8429	8441	27	QE	0.772519	0.795574	0.585661	0.132002	pretrained
RGADDDRPSWR	3	20069	Acetyl:2H(3)@Any N-term	0	11	8441	8451	27	QE	0.862545	0.888682	0.696757	0.784522	pretrained
RGADDDRPSWR	3	20106	Acetyl:2H(3)@Any N-term	0	11	8451	8461	27	QE	0.857336	0.884255	0.690666	0.931144	pretrained
RNEQLTLHDER	3	20119	Acetyl:2H(3)@Any N-term	0	11	8461	8471	27	QE	0.775651	0.816074	0.607707	0.234709	pretrained
RGPAEESSSWRDSSR	3	20124	Acetyl:2H(3)@Any N-term	0	15	8471	8485	27	QE	0.5371	0.627485	0.431831	0.495181	pretrained
RMPPPPR	2	20126	Acetyl:2H(3)@Any N-term	0	7	8485	8491	27	QE	0.819335	0.872741	0.67532	0.63	pretrained
RQKALGKNR	2	20131	Acetyl:2H(3)@Any N-term;Acetyl:2H(3)@K;Acetyl:2H(3)@K	0;3;7	9	8491	8499	27	QE	0.873075	0.901168	0.714579	0.647361	pretrained
RLDASEGGGGTNPGGR	2	20152	Acetyl:2H(3)@Any N-term	0	16	8499	8514	27	QE	0.780461	0.809357	0.600368	0.48733	pretrained
RLEVER	2	20168	Acetyl:2H(3)@Any N-term	0	6	8514	8519	27	QE	0.970981	0.977056	0.863365	0.87218	pretrained
RTSGRDKYGPPVR	3	20179	Acetyl:2H(3)@Any N-term;Acetyl:2H(3)@K	0;7	13	8519	8531	27	QE	0.530549	0.607372	0.415553	0.00439644	pretrained
RMEELHNQEMQKR	3	20195	Acetyl:2H(3)@Any N-term;Oxidation@M;Acetyl:2H(3)@K	0;10;12	13	8531	8543	27	QE	0.944854	0.954891	0.808057	0.882979	pretrained
RDDMLR	2	20214	Acetyl:2H(3)@Any N-term	0	6	8543	8548	27	QE	0.953469	0.965994	0.833501	0.845865	pretrained
RKTLSEETR	2	20218	Acetyl:2H(3)@Any N-term;Acetyl:2H(3)@K	0;2	9	8548	8556	27	QE	0.971207	0.975116	0.857683	0.753299	pretrained
RTKTEISEMNR	3	20223	Acetyl:2H(3)@Any N-term;Acetyl:2H(3)@K;Oxidation@M	0;3;9	11	8556	8566	27	QE	0.82492	0.851925	0.64913	0.692214	pretrained
RAQPKMVTR	2	20226	Acetyl:2H(3)@Any N-term;Acetyl:2H(3)@K	0;5	9	8566	8574	27	QE	0.933969	0.940334	0.778975	0.407258	pretrained
RGKSGFNSKSGQR	2	20230	Acetyl:2H(3)@Any N-term;Acetyl:2H(3)@K;Acetyl:2H(3)@K	0;3;9	13	8574	8586	27	QE	0.778325	0.813448	0.604824	0.406426	pretrained
RTKTEISEMNR	2	20233	Acetyl:2H(3)@Any N-term;Acetyl:2H(3)@K;Oxidation@M	0;3;9	11	8586	8596	27	QE	0.904477	0.910441	0.728515	0.360038	pretrained
RVGELER	2	20247	Acetyl:2H(3)@Any N-term	0	7	8596	8602	27	QE	0.973164	0.975779	0.859599	0.744783	pretrained
RMNPSVSPANQR	2	20249	Acetyl:2H(3)@Any N-term	0	12	8602	8613	27	QE	0.898879	0.909967	0.727787	0.32544	pretrained
RGGNFKSKSR	2	20250	Acetyl:2H(3)@Any N-term;Acetyl:2H(3)@K;Acetyl:2H(3)@K	0;6;8	10	8613	8622	27	QE	0.838243	0.876803	0.680656	0.588288	pretrained
RGGNFKSKSR	3	20261	Acetyl:2H(3)@Any N-term;Acetyl:2H(3)@K;Acetyl:2H(3)@K	0;6;8	10	8622	8631	27	QE	0.898319	0.911144	0.729599	0.552381	pretrained
RGKSGFNSKSGQR	3	20275	Acetyl:2H(3)@Any N-term;Acetyl:2H(3)@K;Acetyl:2H(3)@K	0;3;9	13	8631	8643	27	QE	0.9617	0.96699	0.835972	0.538048	pretrained
RGKSGFNSKSGQR	2	20280	Acetyl:2H(3)@Any N-term;Acetyl:2H(3)@K;Acetyl:2H(3)@K	0;3;9	13	8643	8655	27	QE	0.885756	0.903989	0.71875	0.68997	pretrained
RPGGMTSTYGR	2	20291	Acetyl:2H(3)@Any N-term	0	11	8655	8665	27	QE	0.933287	0.941524	0.781211	0.514071	pretrained
REDFCPR	2	20319	Acetyl:2H(3)@Any N-term;Carbamidomethyl@C	0;5	7	8665	8671	27	QE	0.90737	0.935014	0.769227	0.770435	pretrained
RDLEAVNSR	2	20343	Acetyl:2H(3)@Any N-term	0	9	8671	8679	27	QE	0.807945	0.837838	0.632361	0.701246	pretrained
RDRFVGQSEGKKARPTAR	4	20355	Acetyl:2H(3)@Any N-term;Acetyl:2H(3)@K;Acetyl:2H(3)@K	0;11;12	18	8679	8696	27	QE	0.748312	0.766721	0.556226	0.718632	pretrained
RGRGPKGDKASDPEAGVAR	3	20357	Acetyl:2H(3)@Any N-term;Acetyl:2H(3)@K;Acetyl:2H(3)@K	0;6;9	19	8696	8714	27	QE	0.706658	0.722802	0.514292	0.296016	pretrained
RLSYNTASNKTR	3	20376	Acetyl:2H(3)@Any N-term;Acetyl:2H(3)@K	0;10	12	8714	8725	27	QE	0.889879	0.906263	0.722155	0.612262	pretrained
RKKKYQKR	2	20405	Acetyl:2H(3)@Any N-term;Acetyl:2H(3)@K;Acetyl:2H(3)@K;Acetyl:2H(3)@K;Acetyl:2H(3)@K	0;2;3;4;7	8	8725	8732	27	QE	0.922963	0.926954	0.755165	0.53503	pretrained
RQQEEILR	2	20406	Acetyl:2H(3)@Any N-term	0	8	8732	8739	27	QE	0.960964	0.964517	0.829902	0.877121	pretrained
RAPDQAAEIGSR	2	20449	Acetyl:2H(3)@Any N-term	0	12	8739	8750	27	QE	0.932308	0.944296	0.786512	0.678999	pretrained
RDYDDMSPR	2	20450	Acetyl:2H(3)@Any N-term	0	9	8750	8758	27	QE	0.526697	0.613595	0.420554	0.400477	pretrained
RDYDDMSPR	3	20462	Acetyl:2H(3)@Any N-term	0	9	8758	8766	27	QE	0.898731	0.922053	0.746979	0.437317	pretrained
RDYDDMSPR	3	20468	Acetyl:2H(3)@Any N-term;Oxidation@M	0;6	9	8766	8774	27	QE	0.78504	0.832676	0.626385	0.531158	pretrained
RVQDELAR	2	20512	Acetyl:2H(3)@Any N-term	0	8	8774	8781	27	QE	0.814235	0.836172	0.630423	0.799124	pretrained
RKPASGGLAASSSAPAR	2	20669	Acetyl:2H(3)@Any N-term;Acetyl:2H(3)@K	0;2	17	8781	8797	27	QE	0.727945	0.74838	0.538336	0.626809	pretrained
RKQQTLEAEEAKRR	3	20700	Acetyl:2H(3)@Any N-term;Acetyl:2H(3)@K;Acetyl:2H(3)@K	0;2;12	14	8797	8810	27	QE	0.569176	0.618772	0.424739	0.322846	pretrained
RLELGQR	2	20716	Acetyl:2H(3)@Any N-term	0	7	8810	8816	27	QE	0.966693	0.976793	0.862582	0.833913	pretrained
RFNINDR	2	20777	Acetyl:2H(3)@Any N-term	0	7	8816	8822	27	QE	0.975717	0.979842	0.87196	0.772609	pretrained
RAGIKTHVEKEDGEAR	3	20786	Acetyl:2H(3)@Any N-term;Acetyl:2H(3)@K;Acetyl:2H(3)@K	0;5;10	16	8822	8837	27	QE	0.902344	0.921597	0.74623	0.666241	pretrained
RLQDFNR	2	20864	Acetyl:2H(3)@Any N-term	0	7	8837	8843	27	QE	0.899566	0.924325	0.750742	0.821739	pretrained
RKTVKEKDDTGPKKHSSKNSER	3	20871	Acetyl:2H(3)@Any N-term;Acetyl:2H(3)@K;Acetyl:2H(3)@K;Acetyl:2H(3)@K;Acetyl:2H(3)@K;Acetyl:2H(3)@K;Acetyl:2H(3)@K	0;2;5;7;13;14;18	22	8843	8864	27	QE	0.752238	0.778551	0.56809	0.469647	pretrained
RRDFGEKLTR	3	20881	Acetyl:2H(3)@Any N-term;Acetyl:2H(3)@K	0;7	10	8864	8873	27	QE	0.962355	0.96856	0.839941	0.240283	pretrained
RLVKKPER	2	20985	Acetyl:2H(3)@Any N-term;Acetyl:2H(3)@K;Acetyl:2H(3)@K	0;4;5	8	8873	8880	27	QE	0.949058	0.960684	0.820892	0.826765	pretrained
RTEEGPTLSYGR	2	21017	Acetyl:2H(3)@Any N-term	0	12	8880	8891	27	QE	0.926718	0.94524	0.788345	0.699366	pretrained
RDVQLIR	2	21035	Acetyl:2H(3)@Any N-term	0	7	8891	8897	27	QE	0.965545	0.973828	0.85403	0.763044	pretrained
REASSEELKAAYRR	3	21040	Acetyl:2H(3)@Any N-term;Acetyl:2H(3)@K	0;9	14	8897	8910	27	QE	0.799109	0.827902	0.620931	0.421754	pretrained
RISAVSVAER	2	21087	Acetyl:2H(3)@Any N-term	0	10	8910	8919	27	QE	0.951766	0.960225	0.819844	0.631789	pretrained
RALELEQER	2	21089	Acetyl:2H(3)@Any N-term	0	9	8919	8927	27	QE	0.960288	0.971144	0.846693	0.906525	pretrained
RYLENGKETLQR	2	21094	Acetyl:2H(3)@Any N-term;Acetyl:2H(3)@K	0;7	12	8927	8938	27	QE	0.912011	0.911171	0.729641	0.268922	pretrained
RLMKMNR	2	21102	Acetyl:2H(3)@Any N-term;Acetyl:2H(3)@K	0;4	7	8938	8944	27	QE	0.936002	0.950696	0.799259	0.604348	pretrained
RNLELPR	2	21107	Acetyl:2H(3)@Any N-term	0	7	8944	8950	27	QE	0.88644	0.91995	0.743541	0.746522	pretrained
RLQLVR	2	21115	Acetyl:2H(3)@Any N-term	0	6	8950	8955	27	QE	0.980885	0.985195	0.890317	0.745113	pretrained
RISAVSVAER	2	21135	Acetyl:2H(3)@Any N-term	0	10	8955	8964	27	QE	0.974516	0.976972	0.863112	0.749292	pretrained
RLEVEREAEKKR	3	21137	Acetyl:2H(3)@Any N-term;Acetyl:2H(3)@K;Acetyl:2H(3)@K	0;10;11	12	8964	8975	27	QE	0.778775	0.828916	0.622083	0.712403	pretrained
RALELEQER	2	21139	Acetyl:2H(3)@Any N-term	0	9	8975	8983	27	QE	0.953575	0.961666	0.823158	0.861254	pretrained
RVELSGPKAAEPVSRR	3	21171	Acetyl:2H(3)@Any N-term;Acetyl:2H(3)@K	0;8	16	8983	8998	27	QE	0.659631	0.70284	0.49617	0.194971	pretrained
RTLEEKEQEEAR	2	21185	Acetyl:2H(3)@Any N-term;Acetyl:2H(3)@K	0;6	12	8998	9009	27	QE	0.945428	0.956777	0.812143	0.675617	pretrained
RGAPGDVWAR	2	21203	Acetyl:2H(3)@Any N-term	0	10	9009	9018	27	QE	0.714594	0.757588	0.547244	0.369884	pretrained
RLGDSSGPALKR	2	21214	Acetyl:2H(3)@Any N-term;Acetyl:2H(3)@K	0;11	12	9018	9029	27	QE	0.974711	0.978589	0.868026	0.658985	pretrained
RKLAFR	2	21232	Acetyl:2H(3)@Any N-term;Acetyl:2H(3)@K	0;2	6	9029	9034	27	QE	0.906125	0.915765	0.736829	0.906015	pretrained
RRLEEQAAQHKADIEER	4	21269	Acetyl:2H(3)@Any N-term;Acetyl:2H(3)@K	0;11	17	9034	9050	27	QE	0.85548	0.873092	0.675778	0.49098	pretrained
RRLEEQAAQHKADIEER	3	21276	Acetyl:2H(3)@Any N-term;Acetyl:2H(3)@K	0;11	17	9050	9066	27	QE	0.840199	0.854477	0.652244	0.316506	pretrained
RPELEDSTLR	2	21277	Acetyl:2H(3)@Any N-term	0	10	9066	9075	27	QE	0.769983	0.819024	0.610969	0.894208	pretrained
RLAALQKR	2	21293	Acetyl:2H(3)@Any N-term;Acetyl:2H(3)@K	0;7	8	9075	9082	27	QE	0.924556	0.946329	0.790479	0.683361	pretrained
RVTKEKEKKTKQDR	2	21304	Acetyl:2H(3)@Any N-term;Acetyl:2H(3)@K;Acetyl:2H(3)@K;Acetyl:2H(3)@K;Acetyl:2H(3)@K;Acetyl:2H(3)@K	0;4;6;8;9;11	14	9082	9095	27	QE	0.806409	0.802386	0.592873	0.307308	pretrained
RVTKEKEKKTKQDR	3	21306	Acetyl:2H(3)@Any N-term;Acetyl:2H(3)@K;Acetyl:2H(3)@K;Acetyl:2H(3)@K;Acetyl:2H(3)@K;Acetyl:2H(3)@K	0;4;6;8;9;11	14	9095	9108	27	QE	0.756005	0.780201	0.569766	0.483949	pretrained
RKEPKSQDIYLR	3	21307	Acetyl:2H(3)@Any N-term;Acetyl:2H(3)@K;Acetyl:2H(3)@K	0;2;5	12	9108	9119	27	QE	0.643672	0.694601	0.488839	0.0603946	pretrained
RLPNKELSR	2	21315	Acetyl:2H(3)@Any N-term;Acetyl:2H(3)@K	0;5	9	9119	9127	27	QE	0.70902	0.736153	0.526719	0.446481	pretrained
RDPEEPEKTELSER	2	21317	Acetyl:2H(3)@Any N-term;Acetyl:2H(3)@K	0;8	14	9127	9140	27	QE	0.901305	0.916085	0.737336	0.557458	pretrained
RAIADMLR	2	21342	Acetyl:2H(3)@Any N-term;Oxidation@M	0;6	8	9140	9147	27	QE	0.967394	0.972669	0.850819	0.654899	pretrained
RFYEQMNGPVAGASR	2	21351	Acetyl:2H(3)@Any N-term;Oxidation@M	0;6	15	9147	9161	27	QE	0.969922	0.973546	0.853242	0.503623	pretrained
RSGKLKDLSR	2	21355	Acetyl:2H(3)@Any N-term;Acetyl:2H(3)@K;Acetyl:2H(3)@K	0;4;6	10	9161	9170	27	QE	0.950439	0.957142	0.812943	0.572844	pretrained
RFYEQMNGPVAGASR	3	21356	Acetyl:2H(3)@Any N-term;Oxidation@M	0;6	15	9170	9184	27	QE	0.946024	0.955278	0.808888	0.749146	pretrained
RLSSEVEALRR	3	21384	Acetyl:2H(3)@Any N-term	0	11	9184	9194	27	QE	0.897909	0.917525	0.739633	0.549906	pretrained
RLVTIKR	2	21397	Acetyl:2H(3)@Any N-term;Acetyl:2H(3)@K	0;6	7	9194	9200	27	QE	0.935863	0.950257	0.798359	0.881739	pretrained
RAATENIPVVR	2	21403	Acetyl:2H(3)@Any N-term	0	11	9200	9210	27	QE	0.959853	0.967649	0.837625	0.805629	pretrained
RPTFQELQR	2	21410	Acetyl:2H(3)@Any N-term	0	9	9210	9218	27	QE	0.856783	0.883923	0.690214	0.895345	pretrained
RAIADMLR	2	21426	Acetyl:2H(3)@Any N-term;Oxidation@M	0;6	8	9218	9225	27	QE	0.977761	0.981429	0.877117	0.917351	pretrained
RSGKLKDLSR	2	21428	Acetyl:2H(3)@Any N-term;Acetyl:2H(3)@K;Acetyl:2H(3)@K	0;4;6	10	9225	9234	27	QE	0.963689	0.965815	0.833061	0.875418	pretrained
RSGKLKDLSR	3	21437	Acetyl:2H(3)@Any N-term;Acetyl:2H(3)@K;Acetyl:2H(3)@K	0;4;6	10	9234	9243	27	QE	0.97458	0.978986	0.869259	0.806049	pretrained
RGTTVYLCEKR	2	21440	Acetyl:2H(3)@Any N-term;Carbamidomethyl@C;Acetyl:2H(3)@K	0;8;10	11	9243	9253	27	QE	0.922764	0.937979	0.774611	0.89212	pretrained
RGWAAPIR	2	21453	Acetyl:2H(3)@Any N-term	0	8	9253	9260	27	QE	0.896779	0.915297	0.736088	0.264094	pretrained
REKAEGDVAALNR	2	21461	Acetyl:2H(3)@Any N-term;Acetyl:2H(3)@K	0;3	13	9260	9272	27	QE	0.90637	0.922309	0.747401	0.883359	pretrained
REKAEGDVAALNR	3	21466	Acetyl:2H(3)@Any N-term;Acetyl:2H(3)@K	0;3	13	9272	9284	27	QE	0.948574	0.956718	0.812013	0.61002	pretrained
RAQKKAKLEEER	3	21478	Acetyl:2H(3)@Any N-term;Acetyl:2H(3)@K;Acetyl:2H(3)@K;Acetyl:2H(3)@K	0;4;5;7	12	9284	9295	27	QE	0.937304	0.949936	0.797704	0.566244	pretrained
RLKEEIER	2	21537	Acetyl:2H(3)@Any N-term;Acetyl:2H(3)@K	0;3	8	9295	9302	27	QE	0.974083	0.974196	0.855064	0.805692	pretrained
RPLSTSEKVKVR	3	21577	Acetyl:2H(3)@Any N-term;Acetyl:2H(3)@K;Acetyl:2H(3)@K	0;8;10	12	9302	9313	27	QE	0.912314	0.927746	0.756512	0.850599	pretrained
RKELKKIR	2	21707	Acetyl:2H(3)@Any N-term;Acetyl:2H(3)@K;Acetyl:2H(3)@K;Acetyl:2H(3)@K	0;2;5;6	8	9313	9320	27	QE	0.947162	0.944438	0.786785	0.584018	pretrained
RRKPDTIEVQQMKAQAR	3	21782	Acetyl:2H(3)@Any N-term;Acetyl:2H(3)@K;Acetyl:2H(3)@K	0;3;13	17	9320	9336	27	QE	0.183159	0.249675	0.160648	0.588049	pretrained
RPNGVITGLAAR	2	21820	Acetyl:2H(3)@Any N-term	0	12	9336	9347	27	QE	0.900342	0.907941	0.724693	0.170331	pretrained
RIQSGLGALSR	2	21872	Acetyl:2H(3)@Any N-term	0	11	9347	9357	27	QE	0.954217	0.959728	0.818713	0.823452	pretrained
RKEPKSQDIYLR	2	21919	Acetyl:2H(3)@Any N-term;Acetyl:2H(3)@K;Acetyl:2H(3)@K	0;2;5	12	9357	9368	27	QE	0.936413	0.944909	0.7877	0.485483	pretrained
RKEPKSQDIYLR	3	21926	Acetyl:2H(3)@Any N-term;Acetyl:2H(3)@K;Acetyl:2H(3)@K	0;2;5	12	9368	9379	27	QE	0.885793	0.906888	0.723097	0.666526	pretrained
RLASTSDIEEKENRDSSSLR	3	22031	Acetyl:2H(3)@Any N-term;Acetyl:2H(3)@K	0;11	20	9379	9398	27	QE	0.796766	0.814626	0.606115	0.775051	pretrained
RVEELVAKR	2	22053	Acetyl:2H(3)@Any N-term;Acetyl:2H(3)@K	0;8	9	9398	9406	27	QE	0.934172	0.949544	0.796907	0.892595	pretrained
RVEELVAKR	2	22102	Acetyl:2H(3)@Any N-term;Acetyl:2H(3)@K	0;8	9	9406	9414	27	QE	0.87966	0.894515	0.704958	0.744685	pretrained
RIAAEEKKKQDELKR	3	22167	Acetyl:2H(3)@Any N-term;Acetyl:2H(3)@K;Acetyl:2H(3)@K;Acetyl:2H(3)@K;Acetyl:2H(3)@K	0;7;8;9;14	15	9414	9428	27	QE	0.881077	0.903952	0.718694	0.775735	pretrained
RQQEGFKGTFPDAR	2	22211	Acetyl:2H(3)@Any N-term;Acetyl:2H(3)@K	0;7	14	9428	9441	27	QE	0.940493	0.944207	0.786339	0.132972	pretrained
RLLEGEDAHLTQYKKEPVTTR	4	22265	Acetyl:2H(3)@Any N-term;Acetyl:2H(3)@K;Acetyl:2H(3)@K	0;14;15	21	9441	9461	27	QE	0.928081	0.932374	0.764533	0.022105	pretrained
RLEEVKLKR	2	22300	Acetyl:2H(3)@Any N-term;Acetyl:2H(3)@K;Acetyl:2H(3)@K	0;6;8	9	9461	9469	27	QE	0.863956	0.89626	0.707453	0.643512	pretrained
RLEEVKLKR	3	22309	Acetyl:2H(3)@Any N-term;Acetyl:2H(3)@K;Acetyl:2H(3)@K	0;6;8	9	9469	9477	27	QE	0.88393	0.906832	0.723013	0.766679	pretrained
RTNSTFNQVVLKR	2	22319	Acetyl:2H(3)@Any N-term;Acetyl:2H(3)@K	0;12	13	9477	9489	27	QE	0.95676	0.962223	0.824456	0.830873	pretrained
RTNSTFNQVVLKR	3	22323	Acetyl:2H(3)@Any N-term;Acetyl:2H(3)@K	0;12	13	9489	9501	27	QE	0.983762	0.986418	0.894958	0.945452	pretrained
RFYEQMNGPVAGASR	2	22332	Acetyl:2H(3)@Any N-term	0	15	9501	9515	27	QE	0.956847	0.969003	0.841077	0.774128	pretrained
RELDESLQVAER	2	22333	Acetyl:2H(3)@Any N-term	0	12	9515	9526	27	QE	0.97796	0.982238	0.879832	0.801691	pretrained
RFYEQMNGPVAGASR	3	22338	Acetyl:2H(3)@Any N-term	0	15	9526	9540	27	QE	0.983054	0.986246	0.894293	0.803657	pretrained
RPHFFFPKSR	3	22363	Acetyl:2H(3)@Any N-term;Acetyl:2H(3)@K	0;8	10	9540	9549	27	QE	0.880911	0.906209	0.722073	0.677091	pretrained
RELDESLQVAER	2	22388	Acetyl:2H(3)@Any N-term	0	12	9549	9560	27	QE	0.908026	0.923326	0.74908	0.581677	pretrained
RESLGLESKDGS	2	22397	Acetyl:2H(3)@Any N-term;Acetyl:2H(3)@K	0;9	12	9560	9571	27	QE	0.857326	0.877607	0.681722	0.711346	pretrained
RKQEELQQLEQQR	3	22401	Acetyl:2H(3)@Any N-term;Acetyl:2H(3)@K	0;2	13	9571	9583	27	QE	0.871813	0.89855	0.710757	0.94822	pretrained
RVGTASVLQPVKKR	3	22412	Acetyl:2H(3)@Any N-term;Acetyl:2H(3)@K;Acetyl:2H(3)@K	0;12;13	14	9583	9596	27	QE	0.975435	0.977458	0.864571	0.879408	pretrained
RGGFAVQAKKPKRNEIDAEPPAKR	3	22413	Acetyl:2H(3)@Any N-term;Acetyl:2H(3)@K;Acetyl:2H(3)@K;Acetyl:2H(3)@K;Acetyl:2H(3)@K	0;9;10;12;23	24	9596	9619	27	QE	0.855776	0.862113	0.661718	0.463426	pretrained
RLCKTVGATALPR	2	22421	Acetyl:2H(3)@Any N-term;Carbamidomethyl@C;Acetyl:2H(3)@K	0;3;4	13	9619	9631	27	QE	0.847647	0.871267	0.673402	0.508684	pretrained
RLCKTVGATALPR	3	22427	Acetyl:2H(3)@Any N-term;Carbamidomethyl@C;Acetyl:2H(3)@K	0;3;4	13	9631	9643	27	QE	0.951101	0.951836	0.801613	0.628148	pretrained
RALFLASR	2	22444	Acetyl:2H(3)@Any N-term	0	8	9643	9650	27	QE	0.963123	0.970145	0.844047	0.847564	pretrained
RPIPCKLEPGGGAEAQAVR	3	22569	Acetyl:2H(3)@Any N-term;Carbamidomethyl@C;Acetyl:2H(3)@K	0;5;6	19	9650	9668	27	QE	0.964116	0.967393	0.836981	0.874703	pretrained
RNAVLEADFAKR	2	22688	Acetyl:2H(3)@Any N-term;Acetyl:2H(3)@K	0;11	12	9668	9679	27	QE	0.819999	0.849581	0.64629	0.542283	pretrained
RYQKSTELLIR	2	22707	Acetyl:2H(3)@Any N-term;Acetyl:2H(3)@K	0;4	11	9679	9689	27	QE	0.973786	0.97754	0.86482	0.760319	pretrained
RKPDTIEVQQMKAQAR	3	22709	Acetyl:2H(3)@Any N-term;Acetyl:2H(3)@K;Acetyl:2H(3)@K	0;2;12	16	9689	9704	27	QE	0.954578	0.963801	0.828185	0.672242	pretrained
RIAAEEKKKQDELKR	3	22753	Acetyl:2H(3)@Any N-term;Acetyl:2H(3)@K;Acetyl:2H(3)@K;Acetyl:2H(3)@K;Acetyl:2H(3)@K	0;7;8;9;14	15	9704	9718	27	QE	0.92616	0.940717	0.779692	0.724778	pretrained
RIAAEEKKKQDELKR	2	22758	Acetyl:2H(3)@Any N-term;Acetyl:2H(3)@K;Acetyl:2H(3)@K;Acetyl:2H(3)@K;Acetyl:2H(3)@K	0;7;8;9;14	15	9718	9732	27	QE	0.897199	0.897557	0.709319	0.204477	pretrained
RLLAIQAKKER	2	22810	Acetyl:2H(3)@Any N-term;Acetyl:2H(3)@K;Acetyl:2H(3)@K	0;8;9	11	9732	9742	27	QE	0.914265	0.925849	0.753297	0.502439	pretrained
RQFHLTDDDLLR	3	22813	Acetyl:2H(3)@Any N-term	0	12	9742	9753	27	QE	0.720167	0.778849	0.568393	0.5642	pretrained
RLLAIQAKKER	3	22814	Acetyl:2H(3)@Any N-term;Acetyl:2H(3)@K;Acetyl:2H(3)@K	0;8;9	11	9753	9763	27	QE	0.977718	0.981006	0.875723	0.997561	pretrained
RLKTLLVNNNR	2	23023	Acetyl:2H(3)@Any N-term;Acetyl:2H(3)@K	0;3	11	9763	9773	27	QE	0.866532	0.878559	0.682989	0.663696	pretrained
RAIADMLR	2	23047	Acetyl:2H(3)@Any N-term;Oxidation@M	0;6	8	9773	9780	27	QE	0.942095	0.950008	0.79785	0.833881	pretrained
RAIADMLR	2	23077	Acetyl:2H(3)@Any N-term	0	8	9780	9787	27	QE	0.894759	0.915865	0.736988	0.803503	pretrained
RELEIESQTEEQPTTKQAKAVEVGR	3	23142	Acetyl:2H(3)@Any N-term;Acetyl:2H(3)@K;Acetyl:2H(3)@K	0;16;19	25	9787	9811	27	QE	0.963332	0.968752	0.840433	0.648481	pretrained
RLLEGEDAHLTQYKKEPVTTR	3	23160	Acetyl:2H(3)@Any N-term;Acetyl:2H(3)@K;Acetyl:2H(3)@K	0;14;15	21	9811	9831	27	QE	0.817484	0.851889	0.649085	0.359892	pretrained
RLLEGEDAHLTQYKKEPVTTR	4	23168	Acetyl:2H(3)@Any N-term;Acetyl:2H(3)@K;Acetyl:2H(3)@K	0;14;15	21	9831	9851	27	QE	0.929442	0.932154	0.764145	0.370394	pretrained
RPIQVMMMGSAR	2	23214	Acetyl:2H(3)@Any N-term	0	12	9851	9862	27	QE	0.832229	0.855785	0.653851	0.488584	pretrained
RDKEAELQCTQLDLER	2	23217	Acetyl:2H(3)@Any N-term;Acetyl:2H(3)@K;Carbamidomethyl@C	0;3;9	16	9862	9877	27	QE	0.953198	0.955887	0.810203	0.599361	pretrained
RDKEAELQCTQLDLER	3	23219	Acetyl:2H(3)@Any N-term;Acetyl:2H(3)@K;Carbamidomethyl@C	0;3;9	16	9877	9892	27	QE	0.899162	0.91731	0.739287	0.71117	pretrained
RGLFTGLTPR	2	23230	Acetyl:2H(3)@Any N-term	0	10	9892	9901	27	QE	0.91881	0.935705	0.77047	0.548005	pretrained
RGLKYELISETGGSHDKR	3	23245	Acetyl:2H(3)@Any N-term;Acetyl:2H(3)@K;Acetyl:2H(3)@K	0;4;17	18	9901	9918	27	QE	0.949987	0.95653	0.811602	0.492327	pretrained
RDLAQALINR	2	23248	Acetyl:2H(3)@Any N-term	0	10	9918	9927	27	QE	0.929171	0.947275	0.792352	0.809138	pretrained
REPLSLINVR	2	23254	Acetyl:2H(3)@Any N-term	0	10	9927	9936	27	QE	0.917948	0.93705	0.77291	0.755856	pretrained
RTELTAATGER	2	23328	Acetyl:2H(3)@Any N-term	0	11	9936	9946	27	QE	0.851241	0.856929	0.655261	-0.341463	pretrained
RGDLPFVVPR	2	23333	Acetyl:2H(3)@Any N-term	0	10	9946	9955	27	QE	0.906579	0.93011	0.760577	0.638996	pretrained
RLSDKGLKAELMER	3	23386	Acetyl:2H(3)@Any N-term;Acetyl:2H(3)@K;Acetyl:2H(3)@K;Oxidation@M	0;5;8;12	14	9955	9968	27	QE	0.966488	0.97151	0.847673	0.46474	pretrained
RLSDKGLKAELMER	2	23387	Acetyl:2H(3)@Any N-term;Acetyl:2H(3)@K;Acetyl:2H(3)@K;Oxidation@M	0;5;8;12	14	9968	9981	27	QE	0.956233	0.956662	0.811891	0.612183	pretrained
RLSDKGLKAELMER	3	23421	Acetyl:2H(3)@Any N-term;Acetyl:2H(3)@K;Acetyl:2H(3)@K;Oxidation@M	0;5;8;12	14	9981	9994	27	QE	0.971545	0.975737	0.859476	0.689234	pretrained
RLSDKGLKAELMER	2	23426	Acetyl:2H(3)@Any N-term;Acetyl:2H(3)@K;Acetyl:2H(3)@K;Oxidation@M	0;5;8;12	14	9994	10007	27	QE	0.98273	0.982352	0.880221	0.559122	pretrained
RKEVVVYLDDNQKPPVGEGLNR	3	23527	Acetyl:2H(3)@Any N-term;Acetyl:2H(3)@K;Acetyl:2H(3)@K	0;2;13	22	10007	10028	27	QE	0.929546	0.92975	0.759954	0.4797	pretrained
RILSKPIEVQVGGR	3	23533	Acetyl:2H(3)@Any N-term;Acetyl:2H(3)@K	0;5	14	10028	10041	27	QE	0.899985	0.917652	0.739835	0.610049	pretrained
RILSKPIEVQVGGR	2	23536	Acetyl:2H(3)@Any N-term;Acetyl:2H(3)@K	0;5	14	10041	10054	27	QE	0.801778	0.826397	0.619226	0.313199	pretrained
RYIGIVKQAGLER	2	23605	Acetyl:2H(3)@Any N-term;Acetyl:2H(3)@K	0;7	13	10054	10066	27	QE	0.966496	0.972082	0.849216	0.545864	pretrained
RYIGIVKQAGLER	3	23611	Acetyl:2H(3)@Any N-term;Acetyl:2H(3)@K	0;7	13	10066	10078	27	QE	0.981162	0.983722	0.884978	0.680146	pretrained
RAEDGSVIDYELIDQDAR	2	23715	Acetyl:2H(3)@Any N-term	0	18	10078	10095	27	QE	0.989304	0.990855	0.913836	0.778391	pretrained
RAEDGSVIDYELIDQDAR	3	23716	Acetyl:2H(3)@Any N-term	0	18	10095	10112	27	QE	0.983842	0.986786	0.896392	0.916441	pretrained
RPKLPQTSDDEKKDF	2	23734	Acetyl:2H(3)@Any N-term;Acetyl:2H(3)@K;Acetyl:2H(3)@K;Acetyl:2H(3)@K	0;3;12;13	15	10112	10126	27	QE	0.725542	0.775355	0.564858	0.376042	pretrained
RPKLPQTSDDEKKDF	3	23738	Acetyl:2H(3)@Any N-term;Acetyl:2H(3)@K;Acetyl:2H(3)@K;Acetyl:2H(3)@K	0;3;12;13	15	10126	10140	27	QE	0.863228	0.874667	0.67784	0.17553	pretrained
RAEDGSVIDYELIDQDAR	2	23812	Acetyl:2H(3)@Any N-term	0	18	10140	10157	27	QE	0.922774	0.93175	0.763436	0.58083	pretrained
RVAEELALEQAKKESEDQKR	3	23882	Acetyl:2H(3)@Any N-term;Acetyl:2H(3)@K;Acetyl:2H(3)@K;Acetyl:2H(3)@K	0;12;13;19	20	10157	10176	27	QE	0.861146	0.886006	0.693063	0.797362	pretrained
RLSEDYGVLKTDEGIAYR	3	23906	Acetyl:2H(3)@Any N-term;Acetyl:2H(3)@K	0;10	18	10176	10193	27	QE	0.939234	0.947948	0.793692	0.506871	pretrained
RLSEDYGVLKTDEGIAYR	2	23913	Acetyl:2H(3)@Any N-term;Acetyl:2H(3)@K	0;10	18	10193	10210	27	QE	0.97754	0.97951	0.870904	0.727125	pretrained
RKVMEAFEQAER	2	23928	Acetyl:2H(3)@Any N-term;Acetyl:2H(3)@K	0;2	12	10210	10221	27	QE	0.894271	0.914512	0.734851	0.717618	pretrained
RVAEELALEQAKKESEDQKR	4	23967	Acetyl:2H(3)@Any N-term;Acetyl:2H(3)@K;Acetyl:2H(3)@K;Acetyl:2H(3)@K	0;12;13;19	20	10221	10240	27	QE	0.916097	0.923349	0.749119	0.473028	pretrained
RVAEELALEQAKKESEDQKR	3	23969	Acetyl:2H(3)@Any N-term;Acetyl:2H(3)@K;Acetyl:2H(3)@K;Acetyl:2H(3)@K	0;12;13;19	20	10240	10259	27	QE	0.948612	0.956372	0.811257	0.586193	pretrained
RLSDKGLKAELMER	2	23983	Acetyl:2H(3)@Any N-term;Acetyl:2H(3)@K;Acetyl:2H(3)@K	0;5;8	14	10259	10272	27	QE	0.943235	0.93914	0.776751	0.374072	pretrained
RLSDKGLKAELMER	3	23986	Acetyl:2H(3)@Any N-term;Acetyl:2H(3)@K;Acetyl:2H(3)@K	0;5;8	14	10272	10285	27	QE	0.953475	0.95951	0.81822	0.553317	pretrained
RLSDKGLKAELMER	2	23997	Acetyl:2H(3)@Any N-term;Acetyl:2H(3)@K;Acetyl:2H(3)@K;Oxidation@M	0;5;8;12	14	10285	10298	27	QE	0.866755	0.875647	0.679129	0.433237	pretrained
RLSDKGLKAELMER	3	24000	Acetyl:2H(3)@Any N-term;Acetyl:2H(3)@K;Acetyl:2H(3)@K;Oxidation@M	0;5;8;12	14	10298	10311	27	QE	0.850847	0.874594	0.677745	0.503202	pretrained
RLSDKGLKAELMER	2	24036	Acetyl:2H(3)@Any N-term;Acetyl:2H(3)@K;Acetyl:2H(3)@K	0;5;8	14	10311	10324	27	QE	0.9437	0.943294	0.784581	0.279604	pretrained
RLSDKGLKAELMER	3	24049	Acetyl:2H(3)@Any N-term;Acetyl:2H(3)@K;Acetyl:2H(3)@K	0;5;8	14	10324	10337	27	QE	0.966996	0.971058	0.846462	0.441561	pretrained
RGKNVVHQLSVTLEDLYNGATR	4	24052	Acetyl:2H(3)@Any N-term;Acetyl:2H(3)@K	0;3	22	10337	10358	27	QE	0.811917	0.833842	0.627728	0.738747	pretrained
RGKNVVHQLSVTLEDLYNGATR	3	24054	Acetyl:2H(3)@Any N-term;Acetyl:2H(3)@K	0;3	22	10358	10379	27	QE	0.719599	0.766123	0.555634	0.597479	pretrained
RLSDKGLKAELMER	3	24148	Acetyl:2H(3)@Any N-term;Acetyl:2H(3)@K;Acetyl:2H(3)@K	0;5;8	14	10379	10392	27	QE	0.94378	0.949489	0.796795	0.514428	pretrained
RLSDKGLKAELMER	2	24164	Acetyl:2H(3)@Any N-term;Acetyl:2H(3)@K;Acetyl:2H(3)@K	0;5;8	14	10392	10405	27	QE	0.95098	0.955232	0.80879	0.407837	pretrained
RKQYPISLVLAPTR	3	24228	Acetyl:2H(3)@Any N-term;Acetyl:2H(3)@K	0;2	14	10405	10418	27	QE	0.933697	0.945179	0.788226	0.7662	pretrained
RKQYPISLVLAPTR	2	24229	Acetyl:2H(3)@Any N-term;Acetyl:2H(3)@K	0;2	14	10418	10431	27	QE	0.93569	0.94503	0.787935	0.802612	pretrained
RFSDQFPLPLKER	2	24312	Acetyl:2H(3)@Any N-term;Acetyl:2H(3)@K	0;11	13	10431	10443	27	QE	0.938851	0.947236	0.792273	0.522959	pretrained
RFSDQFPLPLKER	2	24315	Acetyl:2H(3)@Any N-term;Acetyl:2H(3)@K	0;11	13	10443	10455	27	QE	0.804681	0.834181	0.628118	0.380156	pretrained
RFSDQFPLPLKER	3	24320	Acetyl:2H(3)@Any N-term;Acetyl:2H(3)@K	0;11	13	10455	10467	27	QE	0.973462	0.976603	0.862017	0.791685	pretrained
RVAKEYETVMKGLDR	3	24328	Acetyl:2H(3)@Any N-term;Acetyl:2H(3)@K;Acetyl:2H(3)@K	0;4;11	15	10467	10481	27	QE	0.933172	0.945038	0.787951	0.537423	pretrained
RFDEILEASDGIMVAR	3	24427	Acetyl:2H(3)@Any N-term;Oxidation@M	0;13	16	10481	10496	27	QE	0.961686	0.96822	0.839072	0.577383	pretrained
RIICSAGLSLLAEER	3	24448	Acetyl:2H(3)@Any N-term;Carbamidomethyl@C	0;4	15	10496	10510	27	QE	0.810557	0.840752	0.635774	0.689679	pretrained
RDLEKVLTGEEKALRPGDPGFCAR	3	24581	Acetyl:2H(3)@Any N-term;Acetyl:2H(3)@K;Acetyl:2H(3)@K;Carbamidomethyl@C	0;5;12;22	24	10510	10533	27	QE	0.741014	0.744563	0.534684	0.195066	pretrained
RDLEKVLTGEEKALRPGDPGFCAR	4	24582	Acetyl:2H(3)@Any N-term;Acetyl:2H(3)@K;Acetyl:2H(3)@K;Carbamidomethyl@C	0;5;12;22	24	10533	10556	27	QE	0.92611	0.929748	0.759951	0.456136	pretrained
RKEIDLLLGQTDDTR	3	24596	Acetyl:2H(3)@Any N-term;Acetyl:2H(3)@K	0;2	15	10556	10570	27	QE	0.920771	0.932576	0.764889	0.89812	pretrained
RKEIDLLLGQTDDTR	2	24606	Acetyl:2H(3)@Any N-term;Acetyl:2H(3)@K	0;2	15	10570	10584	27	QE	0.981446	0.982121	0.879438	0.864491	pretrained
RFDEILEASDGIMVAR	2	24631	Acetyl:2H(3)@Any N-term;Oxidation@M	0;13	16	10584	10599	27	QE	0.902546	0.915508	0.736422	0.655154	pretrained
RFDEILEASDGIMVAR	3	24634	Acetyl:2H(3)@Any N-term;Oxidation@M	0;13	16	10599	10614	27	QE	0.982916	0.985729	0.892317	0.750736	pretrained
RKEIDLLLGQTDDTR	3	24639	Acetyl:2H(3)@Any N-term;Acetyl:2H(3)@K	0;2	15	10614	10628	27	QE	0.948136	0.955781	0.809974	0.828264	pretrained
RFDEILEASDGIMVAR	2	24646	Acetyl:2H(3)@Any N-term	0	16	10628	10643	27	QE	0.691219	0.728101	0.519194	0.630731	pretrained
RFDEILEASDGIMVAR	2	24667	Acetyl:2H(3)@Any N-term;Oxidation@M	0;13	16	10643	10658	27	QE	0.897851	0.911308	0.729853	0.547402	pretrained
RFDEILEASDGIMVAR	3	24669	Acetyl:2H(3)@Any N-term;Oxidation@M	0;13	16	10658	10673	27	QE	0.980564	0.983852	0.885439	0.716588	pretrained
RKEIDLLLGQTDDTR	3	24707	Acetyl:2H(3)@Any N-term;Acetyl:2H(3)@K	0;2	15	10673	10687	27	QE	0.775193	0.8056	0.596314	0.738927	pretrained
RLLEDGEDFNLGDALDSSNSMQTIQKTTTR	3	24860	Acetyl:2H(3)@Any N-term;Oxidation@M;Acetyl:2H(3)@K	0;21;26	30	10687	10716	27	QE	0.846615	0.861333	0.66074	0.743605	pretrained
RDLPLLLFR	2	24992	Acetyl:2H(3)@Any N-term	0	9	10716	10724	27	QE	0.954315	0.967007	0.836013	0.834128	pretrained
RGPFELEAFYSDPQGVPYPEAKIGR	3	25002	Acetyl:2H(3)@Any N-term;Acetyl:2H(3)@K	0;22	25	10724	10748	27	QE	0.953532	0.955144	0.8086	0.506165	pretrained
RLLEDGEDFNLGDALDSSNSMQTIQKTTTR	3	25129	Acetyl:2H(3)@Any N-term;Acetyl:2H(3)@K	0;26	30	10748	10777	27	QE	0.86545	0.885077	0.691788	0.761658	pretrained
RLLEDGEDFNLGDALDSSNSMQTIQKTTTR	3	25200	Acetyl:2H(3)@Any N-term;Acetyl:2H(3)@K	0;26	30	10777	10806	27	QE	0.89179	0.906704	0.722819	0.670003	pretrained
RLTSSVSCALDEAAAALTR	3	25488	Acetyl:2H(3)@Any N-term;Carbamidomethyl@C	0;8	19	10806	10824	27	QE	0.985992	0.988397	0.902927	0.730465	pretrained
RLTSSVSCALDEAAAALTR	2	25495	Acetyl:2H(3)@Any N-term;Carbamidomethyl@C	0;8	19	10824	10842	27	QE	0.961695	0.965345	0.831911	0.290565	pretrained
RGAKPEGKAIIDEFEQKLR	3	25590	Acetyl:2H(3)@Any N-term;Acetyl:2H(3)@K;Acetyl:2H(3)@K;Acetyl:2H(3)@K	0;4;8;17	19	10842	10860	27	QE	0.903875	0.920768	0.744874	0.679481	pretrained
RVLQALEGLKMVEKDQDGGR	3	25612	Acetyl:2H(3)@Any N-term;Acetyl:2H(3)@K;Acetyl:2H(3)@K	0;10;14	20	10860	10879	27	QE	0.927228	0.940602	0.779477	0.761258	pretrained
RVDIDEFDENKFVDEQEEAAAAAAEPGPDPSEVDGLLR	4	25740	Acetyl:2H(3)@Any N-term;Acetyl:2H(3)@K	0;11	38	10879	10916	27	QE	0.871798	0.878472	0.682874	0.725871	pretrained
RIDEINKELNQVMEQLGDAR	3	25806	Acetyl:2H(3)@Any N-term;Acetyl:2H(3)@K	0;7	20	10916	10935	27	QE	0.886891	0.902452	0.716469	0.688066	pretrained
RVHEGSQKSQPR	3	26136	Acetyl:2H(3)@Any N-term;Acetyl:2H(3)@K	0;8	12	10935	10946	27	QE	0.73613	0.792525	0.582468	0.544538	pretrained
RDHRPPCAQEAPR	4	26142	Acetyl:2H(3)@Any N-term;Carbamidomethyl@C	0;7	13	10946	10958	27	QE	0.67268	0.707562	0.50041	0.0459183	pretrained
RDHRPPCAQEAPR	3	26144	Acetyl:2H(3)@Any N-term;Carbamidomethyl@C	0;7	13	10958	10970	27	QE	0.484944	0.539944	0.363109	0.049175	pretrained
RDHRPPCAQEAPR	4	26159	Acetyl:2H(3)@Any N-term;Carbamidomethyl@C	0;7	13	10970	10982	27	QE	0.66472	0.708463	0.501222	0.349978	pretrained
RPRPTPGDGEKR	3	26196	Acetyl:2H(3)@Any N-term;Acetyl:2H(3)@K	0;11	12	10982	10993	27	QE	0.803436	0.832348	0.626008	0.34179	pretrained
RSKTKEAR	2	26198	Acetyl:2H(3)@Any N-term;Acetyl:2H(3)@K;Acetyl:2H(3)@K	0;3;5	8	10993	11000	27	QE	0.927993	0.937402	0.773553	0.512315	pretrained
RLSDQRSKER	3	26199	Acetyl:2H(3)@Any N-term;Acetyl:2H(3)@K	0;8	10	11000	11009	27	QE	0.755126	0.775392	0.564895	0.420206	pretrained
RSVEAPTERPGERR	4	26229	Acetyl:2H(3)@Any N-term	0	14	11009	11022	27	QE	0.937658	0.941615	0.781385	0.645736	pretrained
RGEDHPAVMR	3	26237	Acetyl:2H(3)@Any N-term	0	10	11022	11031	27	QE	0.971696	0.976679	0.862242	0.531017	pretrained
RAAVEEKRR	3	26248	Acetyl:2H(3)@Any N-term;Acetyl:2H(3)@K	0;7	9	11031	11039	27	QE	0.734257	0.797169	0.58734	0.790689	pretrained
REELSRQPR	3	26254	Acetyl:2H(3)@Any N-term	0	9	11039	11047	27	QE	0.825179	0.86956	0.671195	0.607221	pretrained
RAEQIQAR	2	26263	Acetyl:2H(3)@Any N-term	0	8	11047	11054	27	QE	0.877724	0.903853	0.718547	0.487137	pretrained
RVIAANNR	2	26299	Acetyl:2H(3)@Any N-term	0	8	11054	11061	27	QE	0.935435	0.955032	0.808359	0.876026	pretrained
RGNDAVMAR	2	26324	Acetyl:2H(3)@Any N-term	0	9	11061	11069	27	QE	0.960993	0.969778	0.843087	0.829729	pretrained
RGNDAVMTR	2	26327	Acetyl:2H(3)@Any N-term	0	9	11069	11077	27	QE	0.712199	0.755861	0.545563	0.168072	pretrained
RKQEEALRR	3	26337	Acetyl:2H(3)@Any N-term;Acetyl:2H(3)@K	0;2	9	11077	11085	27	QE	0.98862	0.990285	0.91119	0.737537	pretrained
RADKKPAR	2	26343	Acetyl:2H(3)@Any N-term;Acetyl:2H(3)@K;Acetyl:2H(3)@K	0;4;5	8	11085	11092	27	QE	0.917437	0.936891	0.772621	0.832786	pretrained
RDYDDMSPR	2	26368	Acetyl:2H(3)@Any N-term;Oxidation@M	0;6	9	11092	11100	27	QE	0.974999	0.980323	0.873501	0.574413	pretrained
RQGQELSAAR	2	26373	Acetyl:2H(3)@Any N-term	0	10	11100	11109	27	QE	0.966033	0.969736	0.842979	0.457658	pretrained
RAPADEGHRPLT	3	26388	Acetyl:2H(3)@Any N-term	0	12	11109	11120	27	QE	0.935964	0.950299	0.798444	0.66272	pretrained
RNEPPPPRNELR	3	26400	Acetyl:2H(3)@Any N-term	0	12	11120	11131	27	QE	0.884242	0.901448	0.714989	0.372939	pretrained
RPGGAGKEGVR	2	26437	Acetyl:2H(3)@Any N-term;Acetyl:2H(3)@K	0;7	11	11131	11141	27	QE	0.782228	0.815368	0.606931	0.498593	pretrained
RKKKVVHR	3	26447	Acetyl:2H(3)@Any N-term;Acetyl:2H(3)@K;Acetyl:2H(3)@K;Acetyl:2H(3)@K	0;2;3;4	8	11141	11148	27	QE	0.935456	0.941577	0.781313	0.841817	pretrained
RKKKVVHR	2	26456	Acetyl:2H(3)@Any N-term;Acetyl:2H(3)@K;Acetyl:2H(3)@K;Acetyl:2H(3)@K	0;2;3;4	8	11148	11155	27	QE	0.982087	0.983758	0.885103	0.389984	pretrained
RKKKVVHR	3	26479	Acetyl:2H(3)@Any N-term;Acetyl:2H(3)@K;Acetyl:2H(3)@K;Acetyl:2H(3)@K	0;2;3;4	8	11155	11162	27	QE	0.589039	0.674472	0.471258	0.766557	pretrained
RKKEANKATR	2	26488	Acetyl:2H(3)@Any N-term;Acetyl:2H(3)@K;Acetyl:2H(3)@K;Acetyl:2H(3)@K	0;2;3;7	10	11162	11171	27	QE	0.887515	0.906849	0.723038	0.289189	pretrained
RSPRPKGDFSSR	3	26525	Acetyl:2H(3)@Any N-term;Acetyl:2H(3)@K	0;6	12	11171	11182	27	QE	0.744504	0.77983	0.569389	0.348062	pretrained
RGAPGAEHEPSLSSR	3	26561	Acetyl:2H(3)@Any N-term	0	15	11182	11196	27	QE	0.950175	0.954812	0.807888	0.623206	pretrained
RGPAEESSSWRDSSR	3	26623	Acetyl:2H(3)@Any N-term	0	15	11196	11210	27	QE	0.917911	0.933338	0.766236	0.6338	pretrained
RGAEDDRGPWR	3	26624	Acetyl:2H(3)@Any N-term	0	11	11210	11220	27	QE	0.881465	0.899328	0.711887	0.560507	pretrained
RGADDDRPSWR	3	26646	Acetyl:2H(3)@Any N-term	0	11	11220	11230	27	QE	0.802743	0.838442	0.633066	0.68546	pretrained
RRNKSTESLQANVQR	3	26647	Acetyl:2H(3)@Any N-term;Acetyl:2H(3)@K	0;4	15	11230	11244	27	QE	0.597542	0.650929	0.451241	0.133356	pretrained
RLEVER	2	26672	Acetyl:2H(3)@Any N-term	0	6	11244	11249	27	QE	0.989525	0.992083	0.919837	0.821053	pretrained
RRNKSTESLQANVQR	3	26677	Acetyl:2H(3)@Any N-term;Acetyl:2H(3)@K	0;4	15	11249	11263	27	QE	0.587274	0.63212	0.43563	0.338995	pretrained
RQLPVTR	2	26696	Acetyl:2H(3)@Any N-term	0	7	11263	11269	27	QE	0.968638	0.975742	0.859491	0.782609	pretrained
RREKAEELAAR	3	26702	Acetyl:2H(3)@Any N-term;Acetyl:2H(3)@K	0;4	11	11269	11279	27	QE	0.799496	0.84198	0.63722	0.559193	pretrained
RKAALSSPR	2	26718	Acetyl:2H(3)@Any N-term;Acetyl:2H(3)@K	0;2	9	11279	11287	27	QE	0.876796	0.906112	0.721928	0.665872	pretrained
RVEELQNR	2	26735	Acetyl:2H(3)@Any N-term	0	8	11287	11294	27	QE	0.921252	0.939913	0.778188	0.828407	pretrained
RGKSGFNSKSGQR	2	26741	Acetyl:2H(3)@Any N-term;Acetyl:2H(3)@K;Acetyl:2H(3)@K	0;3;9	13	11294	11306	27	QE	0.785976	0.818368	0.610242	0.549826	pretrained
RTTWAEER	2	26802	Acetyl:2H(3)@Any N-term	0	8	11306	11313	27	QE	0.948896	0.959515	0.818233	0.617679	pretrained
RLATVEER	2	26860	Acetyl:2H(3)@Any N-term	0	8	11313	11320	27	QE	0.929469	0.941754	0.781648	0.549535	pretrained
RAPDQAAEIGSR	2	26884	Acetyl:2H(3)@Any N-term	0	12	11320	11331	27	QE	0.902966	0.922191	0.747205	0.279845	pretrained
RAQEALGDREPKPTR	3	26898	Acetyl:2H(3)@Any N-term;Acetyl:2H(3)@K	0;12	15	11331	11345	27	QE	0.843984	0.873606	0.676449	0.64255	pretrained
RGPAEESSSWR	2	26927	Acetyl:2H(3)@Any N-term	0	11	11345	11355	27	QE	0.905808	0.908024	0.724819	0.542214	pretrained
RDYDDMSPR	2	26953	Acetyl:2H(3)@Any N-term	0	9	11355	11363	27	QE	0.956868	0.96658	0.83495	0.879032	pretrained
RPLEAPPER	2	26955	Acetyl:2H(3)@Any N-term	0	9	11363	11371	27	QE	0.907532	0.922564	0.74782	0.685117	pretrained
RESSLKYQTR	2	26964	Acetyl:2H(3)@Any N-term;Acetyl:2H(3)@K	0;6	10	11371	11380	27	QE	0.917919	0.925102	0.752042	0.532175	pretrained
RSEKDTAAVVSR	2	26988	Acetyl:2H(3)@Any N-term;Acetyl:2H(3)@K	0;4	12	11380	11391	27	QE	0.820527	0.861571	0.661038	0.75074	pretrained
RQTESDWGKR	2	26989	Acetyl:2H(3)@Any N-term;Acetyl:2H(3)@K	0;9	10	11391	11400	27	QE	0.862094	0.880014	0.684934	0.403475	pretrained
RKETKDYGTKR	2	26996	Acetyl:2H(3)@Any N-term;Acetyl:2H(3)@K;Acetyl:2H(3)@K;Acetyl:2H(3)@K	0;2;5;10	11	11400	11410	27	QE	0.98436	0.983793	0.885228	0.846154	pretrained
REMAKEAKR	2	27001	Acetyl:2H(3)@Any N-term;Acetyl:2H(3)@K;Acetyl:2H(3)@K	0;5;8	9	11410	11418	27	QE	0.846315	0.875104	0.678415	0.48607	pretrained
REPPPYGYR	2	27012	Acetyl:2H(3)@Any N-term	0	9	11418	11426	27	QE	0.926386	0.942663	0.783375	0.770345	pretrained
RQVDQLTNDKAR	2	27019	Acetyl:2H(3)@Any N-term;Acetyl:2H(3)@K	0;10	12	11426	11437	27	QE	0.903323	0.918479	0.741164	0.609232	pretrained
RAELDYR	2	27021	Acetyl:2H(3)@Any N-term	0	7	11437	11443	27	QE	0.981454	0.983503	0.884204	0.599565	pretrained
RQVDQLTNDKAR	3	27029	Acetyl:2H(3)@Any N-term;Acetyl:2H(3)@K	0;10	12	11443	11454	27	QE	0.9532	0.961829	0.823537	0.80155	pretrained
RNAEQYKDQADKASTR	3	27045	Acetyl:2H(3)@Any N-term;Acetyl:2H(3)@K;Acetyl:2H(3)@K	0;7;12	16	11454	11469	27	QE	0.784862	0.824961	0.617606	0.391803	pretrained
RKPASGGLAASSSAPAR	3	27060	Acetyl:2H(3)@Any N-term;Acetyl:2H(3)@K	0;2	17	11469	11485	27	QE	0.937455	0.947989	0.793774	0.802198	pretrained
RPASQKDSGAASEQATAAPNPCSSSSR	3	27108	Acetyl:2H(3)@Any N-term;Acetyl:2H(3)@K;Carbamidomethyl@C	0;6;22	27	11485	11511	27	QE	0.93443	0.937447	0.773635	0.288515	pretrained
RQQSEISAAVER	2	27114	Acetyl:2H(3)@Any N-term	0	12	11511	11522	27	QE	0.908197	0.923297	0.749032	0.467794	pretrained
RMGESDDSILR	2	27118	Acetyl:2H(3)@Any N-term;Oxidation@M	0;2	11	11522	11532	27	QE	0.986563	0.988261	0.902359	0.687899	pretrained
RPSVFER	2	27122	Acetyl:2H(3)@Any N-term	0	7	11532	11538	27	QE	0.903775	0.925035	0.75193	0.857826	pretrained
RGGSTVPKDGPVRPQNAEEEKR	3	27181	Acetyl:2H(3)@Any N-term;Acetyl:2H(3)@K;Acetyl:2H(3)@K	0;8;21	22	11538	11559	27	QE	0.969152	0.970562	0.845147	0.771732	pretrained
RRKPDTIEVQQMKAQAR	3	27203	Acetyl:2H(3)@Any N-term;Acetyl:2H(3)@K;Oxidation@M;Acetyl:2H(3)@K	0;3;12;13	17	11559	11575	27	QE	0.331949	0.376982	0.246076	0.372344	pretrained
RRPEPAGGGNVSAKPGAPPQPAVSAR	3	27323	Acetyl:2H(3)@Any N-term;Acetyl:2H(3)@K	0;14	26	11575	11600	27	QE	0.913393	0.916799	0.738472	0.412727	pretrained
RLDIAGR	2	27329	Acetyl:2H(3)@Any N-term	0	7	11600	11606	27	QE	0.964822	0.974603	0.856215	0.92	pretrained
RLVPGCDVR	2	27352	Acetyl:2H(3)@Any N-term;Carbamidomethyl@C	0;6	9	11606	11614	27	QE	0.983755	0.985433	0.891205	0.48827	pretrained
RFQVVDSR	2	27355	Acetyl:2H(3)@Any N-term	0	8	11614	11621	27	QE	0.960919	0.964453	0.829748	0.367816	pretrained
RMQEMIAR	2	27437	Acetyl:2H(3)@Any N-term	0	8	11621	11628	27	QE	0.963212	0.969535	0.842454	0.840996	pretrained
RDFTPAELRR	3	27467	Acetyl:2H(3)@Any N-term	0	10	11628	11637	27	QE	0.90741	0.928363	0.757567	0.764479	pretrained
RNAEQYKDQADKASTR	3	27484	Acetyl:2H(3)@Any N-term;Acetyl:2H(3)@K;Acetyl:2H(3)@K	0;7;12	16	11637	11652	27	QE	0.959174	0.966937	0.835839	0.856071	pretrained
RNAEQYKDQADKASTR	2	27485	Acetyl:2H(3)@Any N-term;Acetyl:2H(3)@K;Acetyl:2H(3)@K	0;7;12	16	11652	11667	27	QE	0.957832	0.961016	0.821657	0.193943	pretrained
RDFTPAELRR	3	27495	Acetyl:2H(3)@Any N-term	0	10	11667	11676	27	QE	0.918802	0.930775	0.761732	0.664736	pretrained
RLLAKAR	2	27521	Acetyl:2H(3)@Any N-term;Acetyl:2H(3)@K	0;5	7	11676	11682	27	QE	0.889862	0.901365	0.714867	0.808261	pretrained
RADQLADESLESTRR	3	27528	Acetyl:2H(3)@Any N-term	0	15	11682	11696	27	QE	0.91163	0.927879	0.75674	0.54836	pretrained
REKAEELAAR	2	27542	Acetyl:2H(3)@Any N-term;Acetyl:2H(3)@K	0;3	10	11696	11705	27	QE	0.982999	0.98625	0.894306	0.979151	pretrained
RSLLTKR	2	27554	Acetyl:2H(3)@Any N-term;Acetyl:2H(3)@K	0;6	7	11705	11711	27	QE	0.910417	0.931821	0.763561	0.748261	pretrained
RIDKDQDGKITR	2	27557	Acetyl:2H(3)@Any N-term;Acetyl:2H(3)@K;Acetyl:2H(3)@K	0;4;9	12	11711	11722	27	QE	0.971714	0.976462	0.861601	0.584003	pretrained
RESKKIADEDALRR	3	27561	Acetyl:2H(3)@Any N-term;Acetyl:2H(3)@K;Acetyl:2H(3)@K	0;4;5	14	11722	11735	27	QE	0.955441	0.960573	0.820639	0.110518	pretrained
RQAVDVSPLR	2	27593	Acetyl:2H(3)@Any N-term	0	10	11735	11744	27	QE	0.964955	0.970994	0.846293	0.870914	pretrained
RKWKEEEKR	2	27619	Acetyl:2H(3)@Any N-term;Acetyl:2H(3)@K;Acetyl:2H(3)@K;Acetyl:2H(3)@K	0;2;4;8	9	11744	11752	27	QE	0.971089	0.976481	0.861657	0.717192	pretrained
RPTFQELQR	2	27642	Acetyl:2H(3)@Any N-term	0	9	11752	11760	27	QE	0.86768	0.888799	0.696919	0.565066	pretrained
RRQEQIQAMPLADSQAVR	3	27679	Acetyl:2H(3)@Any N-term	0	18	11760	11777	27	QE	0.863917	0.882164	0.687828	0.590774	pretrained
RDGLKAIAR	2	27693	Acetyl:2H(3)@Any N-term;Acetyl:2H(3)@K	0;5	9	11777	11785	27	QE	0.958491	0.967239	0.836595	0.700513	pretrained
RQLGLVPR	2	27728	Acetyl:2H(3)@Any N-term	0	8	11785	11792	27	QE	0.878913	0.907368	0.723824	0.708812	pretrained
RAVSQLIR	2	27732	Acetyl:2H(3)@Any N-term	0	8	11792	11799	27	QE	0.956854	0.962285	0.824602	0.673235	pretrained
RMGESDDSILR	2	27735	Acetyl:2H(3)@Any N-term	0	11	11799	11809	27	QE	0.96708	0.973454	0.852985	0.878518	pretrained
RMGESDDSILR	2	27738	Acetyl:2H(3)@Any N-term;Oxidation@M	0;2	11	11809	11819	27	QE	0.973213	0.976693	0.862283	0.778236	pretrained
RAKAMMLR	2	27794	Acetyl:2H(3)@Any N-term;Acetyl:2H(3)@K	0;3	8	11819	11826	27	QE	0.975326	0.977135	0.8636	0.749589	pretrained
REESEAVEAGDPPEELR	2	27883	Acetyl:2H(3)@Any N-term	0	17	11826	11842	27	QE	0.997202	0.997302	0.953225	0.50522	pretrained
REESEAVEAGDPPEELR	3	27884	Acetyl:2H(3)@Any N-term	0	17	11842	11858	27	QE	0.979046	0.981073	0.875942	0.855678	pretrained
RMGESDDSILR	2	27891	Acetyl:2H(3)@Any N-term	0	11	11858	11868	27	QE	0.900951	0.920372	0.744228	0.866792	pretrained
RNLDIERPTYTNLNR	3	27894	Acetyl:2H(3)@Any N-term	0	15	11868	11882	27	QE	0.892156	0.914356	0.734606	0.588346	pretrained
RQLQEERPELSESELTR	3	27917	Acetyl:2H(3)@Any N-term	0	17	11882	11898	27	QE	0.934317	0.948935	0.795674	0.61685	pretrained
RRKPDTIEVQQMKAQAR	3	27928	Acetyl:2H(3)@Any N-term;Acetyl:2H(3)@K;Oxidation@M;Acetyl:2H(3)@K	0;3;12;13	17	11898	11914	27	QE	0.36172	0.416343	0.273377	0.367124	pretrained
RRKPDTIEVQQMKAQAR	3	27929	Acetyl:2H(3)@Any N-term;Acetyl:2H(3)@K;Acetyl:2H(3)@K	0;3;13	17	11914	11930	27	QE	0.367858	0.454879	0.300635	0.365018	pretrained
RNLDIERPTYTNLNR	3	27931	Acetyl:2H(3)@Any N-term	0	15	11930	11944	27	QE	0.923214	0.936217	0.771397	0.629802	pretrained
RRKPDTIEVQQMKAQAR	4	27933	Acetyl:2H(3)@Any N-term;Acetyl:2H(3)@K;Acetyl:2H(3)@K	0;3;13	17	11944	11960	27	QE	0.709418	0.741627	0.531891	0.521566	pretrained
RFEEELAAR	2	27945	Acetyl:2H(3)@Any N-term	0	9	11960	11968	27	QE	0.966386	0.974636	0.856309	0.923021	pretrained
RIVLVDDRECPVR	3	27959	Acetyl:2H(3)@Any N-term;Carbamidomethyl@C	0;10	13	11968	11980	27	QE	0.967652	0.971506	0.847661	0.431828	pretrained
RIQSGLGALSR	2	28024	Acetyl:2H(3)@Any N-term	0	11	11980	11990	27	QE	0.851396	0.855793	0.653861	0.0891182	pretrained
RIVLVDDR	2	28044	Acetyl:2H(3)@Any N-term	0	8	11990	11997	27	QE	0.985726	0.987688	0.899998	0.865627	pretrained
RVFEKYGR	2	28064	Acetyl:2H(3)@Any N-term;Acetyl:2H(3)@K	0;5	8	11997	12004	27	QE	0.919298	0.94668	0.791172	0.782157	pretrained
RHVELEKKAVQAVNR	3	28096	Acetyl:2H(3)@Any N-term;Acetyl:2H(3)@K;Acetyl:2H(3)@K	0;7;8	15	12004	12018	27	QE	0.933607	0.943289	0.784572	0.568592	pretrained
RGATVDKTVCKKNLGR	3	28114	Acetyl:2H(3)@Any N-term;Acetyl:2H(3)@K;Carbamidomethyl@C;Acetyl:2H(3)@K;Acetyl:2H(3)@K	0;7;10;11;12	16	12018	12033	27	QE	0.977494	0.981703	0.878032	0.718061	pretrained
RGPLAGLGPGSTPR	2	28155	Acetyl:2H(3)@Any N-term	0	14	12033	12046	27	QE	0.554295	0.602871	0.411953	0.176599	pretrained
RAAIQELQQKR	2	28248	Acetyl:2H(3)@Any N-term;Acetyl:2H(3)@K	0;10	11	12046	12056	27	QE	0.87657	0.869238	0.67078	0.256942	pretrained
RAAIQELQQKR	3	28250	Acetyl:2H(3)@Any N-term;Acetyl:2H(3)@K	0;10	11	12056	12066	27	QE	0.981737	0.985331	0.890823	0.827674	pretrained
RLEVLDSTKSSR	2	28256	Acetyl:2H(3)@Any N-term;Acetyl:2H(3)@K	0;9	12	12066	12077	27	QE	0.903733	0.919155	0.742255	0.424736	pretrained
RDVQEIFR	2	28283	Acetyl:2H(3)@Any N-term	0	8	12077	12084	27	QE	0.965182	0.974872	0.856982	0.957854	pretrained
RVGTASVLQPVKKR	3	28395	Acetyl:2H(3)@Any N-term;Acetyl:2H(3)@K;Acetyl:2H(3)@K	0;12;13	14	12084	12097	27	QE	0.970756	0.973563	0.85329	0.805771	pretrained
RVGTASVLQPVKKR	2	28403	Acetyl:2H(3)@Any N-term;Acetyl:2H(3)@K;Acetyl:2H(3)@K	0;12;13	14	12097	12110	27	QE	0.871781	0.887237	0.694756	0.44664	pretrained
RKQEELQQLEQQR	3	28419	Acetyl:2H(3)@Any N-term;Acetyl:2H(3)@K	0;2	13	12110	12122	27	QE	0.900435	0.921042	0.745321	0.740447	pretrained
RELIELR	2	28460	Acetyl:2H(3)@Any N-term	0	7	12122	12128	27	QE	0.989639	0.991639	0.917617	0.957391	pretrained
REIGGGEAGAVIGGSAGASPPSTLTPDSRR	3	28461	Acetyl:2H(3)@Any N-term	0	30	12128	12157	27	QE	0.811381	0.820826	0.612973	0.570472	pretrained
RPLPKKPKK	3	28471	Acetyl:2H(3)@Any N-term;Acetyl:2H(3)@K;Acetyl:2H(3)@K;Acetyl:2H(3)@K;Acetyl:2H(3)@K	0;5;6;8;9	9	12157	12165	27	QE	0.604174	0.669848	0.467282	0.621151	pretrained
RPLPKKPKK	2	28490	Acetyl:2H(3)@Any N-term;Acetyl:2H(3)@K;Acetyl:2H(3)@K;Acetyl:2H(3)@K;Acetyl:2H(3)@K	0;5;6;8;9	9	12165	12173	27	QE	0.893442	0.911794	0.730606	0.67687	pretrained
RIEVNVELR	2	28568	Acetyl:2H(3)@Any N-term	0	9	12173	12181	27	QE	0.974117	0.978124	0.866594	0.831195	pretrained
RKKDVDDDGEEKELMER	3	28625	Acetyl:2H(3)@Any N-term;Acetyl:2H(3)@K;Acetyl:2H(3)@K;Acetyl:2H(3)@K	0;2;3;12	17	12181	12197	27	QE	0.881648	0.900958	0.71427	0.799038	pretrained
RKKDVDDDGEEKELMER	2	28635	Acetyl:2H(3)@Any N-term;Acetyl:2H(3)@K;Acetyl:2H(3)@K;Acetyl:2H(3)@K	0;2;3;12	17	12197	12213	27	QE	0.89904	0.913871	0.733844	0.673535	pretrained
RLDLPIER	2	28718	Acetyl:2H(3)@Any N-term	0	8	12213	12220	27	QE	0.961802	0.970503	0.84499	0.781336	pretrained
RGEQADHFTQTPLDPGSQVLVR	3	28728	Acetyl:2H(3)@Any N-term	0	22	12220	12241	27	QE	0.961724	0.965348	0.831919	0.768432	pretrained
RAMELLKVSKDKR	3	28812	Acetyl:2H(3)@Any N-term;Oxidation@M;Acetyl:2H(3)@K;Acetyl:2H(3)@K;Acetyl:2H(3)@K	0;3;7;10;12	13	12241	12253	27	QE	0.88519	0.906045	0.721826	0.580927	pretrained
RQFEDEKANWEAQQR	3	28855	Acetyl:2H(3)@Any N-term;Acetyl:2H(3)@K	0;7	15	12253	12267	27	QE	0.953006	0.962179	0.824354	0.772249	pretrained
RQFEDEKANWEAQQR	2	28873	Acetyl:2H(3)@Any N-term;Acetyl:2H(3)@K	0;7	15	12267	12281	27	QE	0.942121	0.947397	0.792592	0.768421	pretrained
REDLVEEIKR	2	28896	Acetyl:2H(3)@Any N-term;Acetyl:2H(3)@K	0;9	10	12281	12290	27	QE	0.897561	0.915706	0.736735	0.641313	pretrained
RTLTGTAALTVQSQEDNLR	3	28900	Acetyl:2H(3)@Any N-term	0	19	12290	12308	27	QE	0.981011	0.984163	0.88655	0.860377	pretrained
REDLVEEIKR	3	28907	Acetyl:2H(3)@Any N-term;Acetyl:2H(3)@K	0;9	10	12308	12317	27	QE	0.990541	0.992327	0.921087	0.919176	pretrained
RDDKERPPFIPEGVVAR	3	28928	Acetyl:2H(3)@Any N-term;Acetyl:2H(3)@K	0;4	17	12317	12333	27	QE	0.85215	0.862714	0.662474	0.659661	pretrained
RKQIKFEKDLR	3	28975	Acetyl:2H(3)@Any N-term;Acetyl:2H(3)@K;Acetyl:2H(3)@K;Acetyl:2H(3)@K	0;2;5;8	11	12333	12343	27	QE	0.952101	0.959346	0.81785	0.786304	pretrained
RKQAEEAVAKLQAR	3	29079	Acetyl:2H(3)@Any N-term;Acetyl:2H(3)@K;Acetyl:2H(3)@K	0;2;10	14	12343	12356	27	QE	0.951756	0.959409	0.817993	0.474259	pretrained
RSISQQKSGVSITIDDPVR	3	29123	Acetyl:2H(3)@Any N-term;Acetyl:2H(3)@K	0;7	19	12356	12374	27	QE	0.915282	0.92879	0.758299	0.69326	pretrained
RAKLAKEKAEQEKLER	3	29145	Acetyl:2H(3)@Any N-term;Acetyl:2H(3)@K;Acetyl:2H(3)@K;Acetyl:2H(3)@K;Acetyl:2H(3)@K	0;3;6;8;13	16	12374	12389	27	QE	0.851579	0.879577	0.684349	0.696555	pretrained
RGLKYELISETGGSHDKR	3	29147	Acetyl:2H(3)@Any N-term;Acetyl:2H(3)@K;Acetyl:2H(3)@K	0;4;17	18	12389	12406	27	QE	0.94915	0.955728	0.80986	0.600298	pretrained
RTVQSLEIDLDSMR	3	29195	Acetyl:2H(3)@Any N-term;Oxidation@M	0;13	14	12406	12419	27	QE	0.967559	0.973751	0.853815	0.646205	pretrained
RKSHEAEVLKQLAEKR	3	29213	Acetyl:2H(3)@Any N-term;Acetyl:2H(3)@K;Acetyl:2H(3)@K;Acetyl:2H(3)@K	0;2;10;15	16	12419	12434	27	QE	0.565549	0.648495	0.449202	0.655071	pretrained
RKSHEAEVLKQLAEKR	4	29218	Acetyl:2H(3)@Any N-term;Acetyl:2H(3)@K;Acetyl:2H(3)@K;Acetyl:2H(3)@K	0;2;10;15	16	12434	12449	27	QE	0.589733	0.644251	0.445662	0.686024	pretrained
RFKEFLR	2	29238	Acetyl:2H(3)@Any N-term;Acetyl:2H(3)@K	0;3	7	12449	12455	27	QE	0.980701	0.982172	0.879611	0.838261	pretrained
RKSHEAEVLKQLAEKR	3	29262	Acetyl:2H(3)@Any N-term;Acetyl:2H(3)@K;Acetyl:2H(3)@K;Acetyl:2H(3)@K	0;2;10;15	16	12455	12470	27	QE	0.611589	0.684803	0.480224	0.735621	pretrained
RASQGLLSSIENSESDSSEAKEEGSR	3	29298	Acetyl:2H(3)@Any N-term;Acetyl:2H(3)@K	0;21	26	12470	12495	27	QE	0.85679	0.880224	0.685215	0.644068	pretrained
RLGIGGAQELSLRPLEAR	3	29326	Acetyl:2H(3)@Any N-term	0	18	12495	12512	27	QE	0.847825	0.863175	0.663055	0.450242	pretrained
RLTPLQLEIQR	2	29331	Acetyl:2H(3)@Any N-term	0	11	12512	12522	27	QE	0.706866	0.762048	0.551612	0.551876	pretrained
RLQLSPWESSVVNR	2	29547	Acetyl:2H(3)@Any N-term	0	14	12522	12535	27	QE	0.871589	0.888937	0.697111	0.356911	pretrained
RLQLSPWESSVVNR	3	29549	Acetyl:2H(3)@Any N-term	0	14	12535	12548	27	QE	0.723595	0.773433	0.562924	0.436097	pretrained
RPKLPQTSDDEKKDF	3	29563	Acetyl:2H(3)@Any N-term;Acetyl:2H(3)@K;Acetyl:2H(3)@K;Acetyl:2H(3)@K	0;3;12;13	15	12548	12562	27	QE	0.861253	0.873305	0.676056	0.253999	pretrained
RPKLPQTSDDEKKDF	2	29564	Acetyl:2H(3)@Any N-term;Acetyl:2H(3)@K;Acetyl:2H(3)@K;Acetyl:2H(3)@K	0;3;12;13	15	12562	12576	27	QE	0.688861	0.742947	0.533146	0.375085	pretrained
RPKLPQTSDDEKKDF	2	29610	Acetyl:2H(3)@Any N-term;Acetyl:2H(3)@K;Acetyl:2H(3)@K;Acetyl:2H(3)@K	0;3;12;13	15	12576	12590	27	QE	0.726478	0.762753	0.552305	0.339815	pretrained
RKMCLFAGFQR	2	29783	Acetyl:2H(3)@Any N-term;Acetyl:2H(3)@K;Carbamidomethyl@C	0;2;4	11	12590	12600	27	QE	0.916119	0.930468	0.7612	0.607223	pretrained
RKADFKAGKALVISGR	3	29809	Acetyl:2H(3)@Any N-term;Acetyl:2H(3)@K;Acetyl:2H(3)@K;Acetyl:2H(3)@K	0;2;6;9	16	12600	12615	27	QE	0.944114	0.95296	0.80396	0.698611	pretrained
RGPCIIYNEDNGIIKAFR	3	29834	Acetyl:2H(3)@Any N-term;Carbamidomethyl@C;Acetyl:2H(3)@K	0;4;15	18	12615	12632	27	QE	0.703338	0.752296	0.542107	0.587911	pretrained
RTVQSLEIDLDSMR	2	29924	Acetyl:2H(3)@Any N-term	0	14	12632	12645	27	QE	0.978084	0.981117	0.876088	0.624264	pretrained
RTVQSLEIDLDSMR	3	29925	Acetyl:2H(3)@Any N-term	0	14	12645	12658	27	QE	0.990889	0.992636	0.922693	0.807095	pretrained
RKQYPISLVLAPTR	2	29985	Acetyl:2H(3)@Any N-term;Acetyl:2H(3)@K	0;2	14	12658	12671	27	QE	0.925571	0.935984	0.770975	0.482925	pretrained
RLLSRPQDALEGVVLSPSLEAR	3	30081	Acetyl:2H(3)@Any N-term	0	22	12671	12692	27	QE	0.937841	0.94393	0.785804	0.872795	pretrained
RKEVTDEIVKEFMTPR	3	30100	Acetyl:2H(3)@Any N-term;Acetyl:2H(3)@K;Acetyl:2H(3)@K;Oxidation@M	0;2;10;13	16	12692	12707	27	QE	0.903541	0.91877	0.741633	0.705057	pretrained
RANNNAAVAPTTCPLQPVTDPFAFSR	3	30115	Acetyl:2H(3)@Any N-term;Carbamidomethyl@C	0;13	26	12707	12732	27	QE	0.969476	0.971501	0.847648	0.572469	pretrained
RTEKKLKDVLLQVDDERR	3	30145	Acetyl:2H(3)@Any N-term;Acetyl:2H(3)@K;Acetyl:2H(3)@K;Acetyl:2H(3)@K	0;4;5;7	18	12732	12749	27	QE	0.540949	0.61999	0.425726	-0.149311	pretrained
RYDDPEVQKDIKNVPFKIVR	3	30213	Acetyl:2H(3)@Any N-term;Acetyl:2H(3)@K;Acetyl:2H(3)@K;Acetyl:2H(3)@K	0;9;12;17	20	12749	12768	27	QE	0.978126	0.980512	0.874113	0.76082	pretrained
RTEKKLKDVLLQVDDERR	3	30258	Acetyl:2H(3)@Any N-term;Acetyl:2H(3)@K;Acetyl:2H(3)@K;Acetyl:2H(3)@K	0;4;5;7	18	12768	12785	27	QE	0.61688	0.686424	0.481641	-0.0940756	pretrained
RTEKKLKDVLLQVDDERR	4	30269	Acetyl:2H(3)@Any N-term;Acetyl:2H(3)@K;Acetyl:2H(3)@K;Acetyl:2H(3)@K	0;4;5;7	18	12785	12802	27	QE	0.873426	0.897016	0.70854	0.485876	pretrained
RTEKKLKDVLLQVDDERR	3	30294	Acetyl:2H(3)@Any N-term;Acetyl:2H(3)@K;Acetyl:2H(3)@K;Acetyl:2H(3)@K	0;4;5;7	18	12802	12819	27	QE	0.57346	0.653663	0.453538	-0.126045	pretrained
RVLQTIGI	2	30306	Acetyl:2H(3)@Any N-term	0	8	12819	12826	27	QE	0.952231	0.962314	0.824669	0.744937	pretrained
RTEKKLKDVLLQVDDERR	3	30327	Acetyl:2H(3)@Any N-term;Acetyl:2H(3)@K;Acetyl:2H(3)@K;Acetyl:2H(3)@K	0;4;5;7	18	12826	12843	27	QE	0.594451	0.656234	0.455703	0.0580983	pretrained
RLLEDGEDFNLGDALDSSNSMQTIQKTTTR	3	30466	Acetyl:2H(3)@Any N-term;Oxidation@M;Acetyl:2H(3)@K	0;21;26	30	12843	12872	27	QE	0.863568	0.877728	0.681884	0.814593	pretrained
RPDLLTMVVDYR	2	30571	Acetyl:2H(3)@Any N-term	0	12	12872	12883	27	QE	0.980553	0.981785	0.878304	0.5179	pretrained
RPDLLTMVVDYR	3	30572	Acetyl:2H(3)@Any N-term	0	12	12883	12894	27	QE	0.981948	0.985156	0.890173	0.933827	pretrained
RVLSGEFQIVNPHLLKDLTER	3	30659	Acetyl:2H(3)@Any N-term;Acetyl:2H(3)@K	0;16	21	12894	12914	27	QE	0.944569	0.955391	0.80913	0.685045	pretrained
RKEVTDEIVKEFMTPR	3	30686	Acetyl:2H(3)@Any N-term;Acetyl:2H(3)@K;Acetyl:2H(3)@K	0;2;10	16	12914	12929	27	QE	0.911298	0.926142	0.753792	0.517727	pretrained
RKEVTDEIVKEFMTPR	2	30693	Acetyl:2H(3)@Any N-term;Acetyl:2H(3)@K;Acetyl:2H(3)@K	0;2;10	16	12929	12944	27	QE	0.876478	0.890446	0.699215	0.275076	pretrained
RLLEDGEDFNLGDALDSSNSMQTIQKTTTR	3	30694	Acetyl:2H(3)@Any N-term;Acetyl:2H(3)@K	0;26	30	12944	12973	27	QE	0.913086	0.925011	0.751889	0.72072	pretrained
RLLEDGEDFNLGDALDSSNSMQTIQKTTTR	3	30722	Acetyl:2H(3)@Any N-term;Acetyl:2H(3)@K	0;26	30	12973	13002	27	QE	0.895543	0.910452	0.728531	0.865133	pretrained
RGAKPEGKAIIDEFEQKLR	3	31031	Acetyl:2H(3)@Any N-term;Acetyl:2H(3)@K;Acetyl:2H(3)@K;Acetyl:2H(3)@K	0;4;8;17	19	13002	13020	27	QE	0.888485	0.907798	0.724476	0.847691	pretrained
RLAQEPLGLEVDQFLEDVR	3	31230	Acetyl:2H(3)@Any N-term	0	19	13020	13038	27	QE	0.955384	0.962965	0.8262	0.712522	pretrained
RLAEALPKQSVDGKAPLATGEDDDDEVPDLVENFDEASKNEAN	3	31310	Acetyl:2H(3)@Any N-term;Acetyl:2H(3)@K;Acetyl:2H(3)@K;Acetyl:2H(3)@K	0;8;14;39	43	13038	13080	27	QE	0.663234	0.675226	0.471908	0.453899	pretrained
RLAEALPKQSVDGKAPLATGEDDDDEVPDLVENFDEASKNEAN	5	31318	Acetyl:2H(3)@Any N-term;Acetyl:2H(3)@K;Acetyl:2H(3)@K;Acetyl:2H(3)@K	0;8;14;39	43	13080	13122	27	QE	0.843323	0.843918	0.639513	0.393966	pretrained
RSSGENVENNSQR	2	31440	Acetyl:2H(3)@Any N-term	0	13	13122	13134	27	QE	0.805452	0.840202	0.635127	0.296081	pretrained
RGNNGPPKSGR	2	31458	Acetyl:2H(3)@Any N-term;Acetyl:2H(3)@K	0;8	11	13134	13144	27	QE	0.790394	0.830903	0.624352	0.60394	pretrained
RRPSKKKR	3	31464	Acetyl:2H(3)@Any N-term;Acetyl:2H(3)@K;Acetyl:2H(3)@K;Acetyl:2H(3)@K	0;5;6;7	8	13144	13151	27	QE	0.738758	0.802591	0.593092	0.261084	pretrained
RDPSEGEASGRTDTSR	3	31488	Acetyl:2H(3)@Any N-term	0	16	13151	13166	27	QE	0.929307	0.941594	0.781344	0.632176	pretrained
RVEEQREQEKR	3	31527	Acetyl:2H(3)@Any N-term;Acetyl:2H(3)@K	0;10	11	13166	13176	27	QE	0.75231	0.81307	0.604411	0.79212	pretrained
RSKTKEAR	2	31540	Acetyl:2H(3)@Any N-term;Acetyl:2H(3)@K;Acetyl:2H(3)@K	0;3;5	8	13176	13183	27	QE	0.858772	0.878266	0.682598	0.814724	pretrained
REDGAAGDRDLR	3	31588	Acetyl:2H(3)@Any N-term	0	12	13183	13194	27	QE	0.939017	0.94625	0.790324	0.837773	pretrained
RDRDGYSYGSR	3	31620	Acetyl:2H(3)@Any N-term	0	11	13194	13204	27	QE	0.918553	0.936001	0.771005	0.506098	pretrained
RENGQMKATDTATRR	3	31643	Acetyl:2H(3)@Any N-term;Oxidation@M;Acetyl:2H(3)@K	0;6;7	15	13204	13218	27	QE	0.968954	0.970766	0.845686	0.437799	pretrained
RQQEEMMRR	3	31648	Acetyl:2H(3)@Any N-term	0	9	13218	13226	27	QE	0.878714	0.909994	0.727829	0.632698	pretrained
RTPRPLTSAR	3	31679	Acetyl:2H(3)@Any N-term	0	10	13226	13235	27	QE	0.807732	0.85322	0.650708	0.718018	pretrained
RSCPSRVPGAEDNAR	3	31685	Acetyl:2H(3)@Any N-term;Carbamidomethyl@C	0;3	15	13235	13249	27	QE	0.778722	0.811531	0.602731	0.275325	pretrained
RQIKER	2	31698	Acetyl:2H(3)@Any N-term;Acetyl:2H(3)@K	0;4	6	13249	13254	27	QE	0.95184	0.962485	0.82507	0.730827	pretrained
RSSSLKER	2	31702	Acetyl:2H(3)@Any N-term;Acetyl:2H(3)@K	0;6	8	13254	13261	27	QE	0.951834	0.960973	0.821557	0.644773	pretrained
RAEMKTR	2	31732	Acetyl:2H(3)@Any N-term;Acetyl:2H(3)@K	0;5	7	13261	13267	27	QE	0.92364	0.936633	0.772151	0.656957	pretrained
RSNEVLR	2	31738	Acetyl:2H(3)@Any N-term	0	7	13267	13273	27	QE	0.967423	0.971787	0.848418	0.838696	pretrained
RVGPSSGDAPEPSSRR	3	31793	Acetyl:2H(3)@Any N-term	0	16	13273	13288	27	QE	0.970693	0.973698	0.853667	0.749819	pretrained
RRLQQQTKEGAGGGAGTR	3	31801	Acetyl:2H(3)@Any N-term;Acetyl:2H(3)@K	0;8	18	13288	13305	27	QE	0.80002	0.819721	0.611743	0.476753	pretrained
RNPEPLR	2	31816	Acetyl:2H(3)@Any N-term	0	7	13305	13311	27	QE	0.95993	0.969329	0.841921	0.659565	pretrained
RENGQMKATDTATRR	3	31830	Acetyl:2H(3)@Any N-term;Acetyl:2H(3)@K	0;7	15	13311	13325	27	QE	0.889838	0.903242	0.71764	0.110697	pretrained
RNPEPLR	2	31840	Acetyl:2H(3)@Any N-term	0	7	13325	13331	27	QE	0.781026	0.837703	0.632204	0.497826	pretrained
RPYEKGR	2	31855	Acetyl:2H(3)@Any N-term;Acetyl:2H(3)@K	0;5	7	13331	13337	27	QE	0.885162	0.907823	0.724514	0.673478	pretrained
RMEEETKR	2	31870	Acetyl:2H(3)@Any N-term;Acetyl:2H(3)@K	0;7	8	13337	13344	27	QE	0.939749	0.944985	0.787847	0.695402	pretrained
RSGQIEGVR	2	31884	Acetyl:2H(3)@Any N-term	0	9	13344	13352	27	QE	0.738741	0.789753	0.579583	0.497984	pretrained
RKKKVVHR	3	31887	Acetyl:2H(3)@Any N-term;Acetyl:2H(3)@K;Acetyl:2H(3)@K;Acetyl:2H(3)@K	0;2;3;4	8	13352	13359	27	QE	0.47784	0.585018	0.397825	0.659004	pretrained
RKAKESKTR	2	31888	Acetyl:2H(3)@Any N-term;Acetyl:2H(3)@K;Acetyl:2H(3)@K;Acetyl:2H(3)@K	0;2;4;7	9	13359	13367	27	QE	0.810719	0.847402	0.64367	0.554619	pretrained
RPKASDYQR	2	31911	Acetyl:2H(3)@Any N-term;Acetyl:2H(3)@K	0;3	9	13367	13375	27	QE	0.866628	0.890566	0.699382	0.655609	pretrained
RKASELR	2	31915	Acetyl:2H(3)@Any N-term;Acetyl:2H(3)@K	0;2	7	13375	13381	27	QE	0.981515	0.983493	0.884168	0.899565	pretrained
REPLPSR	2	31933	Acetyl:2H(3)@Any N-term	0	7	13381	13387	27	QE	0.949042	0.961362	0.822455	0.811739	pretrained
RAKQTELR	2	31968	Acetyl:2H(3)@Any N-term;Acetyl:2H(3)@K	0;3	8	13387	13394	27	QE	0.952795	0.958351	0.81562	0.821839	pretrained
RGPTSKKEPR	2	31971	Acetyl:2H(3)@Any N-term;Acetyl:2H(3)@K;Acetyl:2H(3)@K	0;6;7	10	13394	13403	27	QE	0.937918	0.943111	0.784231	0.705791	pretrained
RTEVAKKR	2	31973	Acetyl:2H(3)@Any N-term;Acetyl:2H(3)@K;Acetyl:2H(3)@K	0;6;7	8	13403	13410	27	QE	0.881854	0.897528	0.709278	0.516147	pretrained
RMEELHNQEVQKR	3	31976	Acetyl:2H(3)@Any N-term;Oxidation@M;Acetyl:2H(3)@K	0;2;12	13	13410	13422	27	QE	0.957905	0.966388	0.834474	0.911257	pretrained
RTAQEVETYRR	3	31989	Acetyl:2H(3)@Any N-term	0	11	13422	13432	27	QE	0.907504	0.925294	0.752364	0.630582	pretrained
RGPAAPPGDKGR	2	31993	Acetyl:2H(3)@Any N-term;Acetyl:2H(3)@K	0;10	12	13432	13443	27	QE	0.85638	0.878445	0.682838	0.493164	pretrained
RPAPSGGASGDLR	2	32018	Acetyl:2H(3)@Any N-term	0	13	13443	13455	27	QE	0.979541	0.980264	0.873311	0.581904	pretrained
RMDAPASAAAVR	2	32035	Acetyl:2H(3)@Any N-term;Oxidation@M	0;2	12	13455	13466	27	QE	0.923301	0.930645	0.761506	0.296406	pretrained
RGAEDDRGPWR	3	32101	Acetyl:2H(3)@Any N-term	0	11	13466	13476	27	QE	0.879923	0.896799	0.708227	0.500094	pretrained
RTPDPAKSAGGCR	2	32125	Acetyl:2H(3)@Any N-term;Acetyl:2H(3)@K;Carbamidomethyl@C	0;7;12	13	13476	13488	27	QE	0.9873	0.986793	0.896419	0.431774	pretrained
RGAEDDRGPWR	3	32140	Acetyl:2H(3)@Any N-term	0	11	13488	13498	27	QE	0.744077	0.776424	0.565936	0.749625	pretrained
REVEKAKR	2	32141	Acetyl:2H(3)@Any N-term;Acetyl:2H(3)@K;Acetyl:2H(3)@K	0;5;7	8	13498	13505	27	QE	0.862389	0.894291	0.704638	0.605911	pretrained
RRNKSTESLQANVQR	3	32156	Acetyl:2H(3)@Any N-term;Acetyl:2H(3)@K	0;4	15	13505	13519	27	QE	0.605886	0.658668	0.457759	0.0742993	pretrained
RREEEGLQLR	3	32181	Acetyl:2H(3)@Any N-term	0	10	13519	13528	27	QE	0.934134	0.948617	0.795034	0.833076	pretrained
RQLPVTR	2	32186	Acetyl:2H(3)@Any N-term	0	7	13528	13534	27	QE	0.981005	0.985903	0.89298	0.915652	pretrained
RMVKKSR	2	32187	Acetyl:2H(3)@Any N-term;Acetyl:2H(3)@K;Acetyl:2H(3)@K	0;4;5	7	13534	13540	27	QE	0.851179	0.885833	0.692824	0.541304	pretrained
RREEEGIQLR	2	32190	Acetyl:2H(3)@Any N-term	0	10	13540	13549	27	QE	0.876632	0.897877	0.709782	0.558559	pretrained
RKNHTHQQDIDDLKR	4	32258	Acetyl:2H(3)@Any N-term;Acetyl:2H(3)@K;Acetyl:2H(3)@K	0;2;14	15	13549	13563	27	QE	0.845045	0.863066	0.662918	0.518455	pretrained
RREEEGIQLR	3	32259	Acetyl:2H(3)@Any N-term	0	10	13563	13572	27	QE	0.928734	0.944541	0.786986	0.825869	pretrained
RVISTTDAER	2	32309	Acetyl:2H(3)@Any N-term	0	10	13572	13581	27	QE	0.952901	0.960531	0.820542	0.685328	pretrained
RAQEEAKEAEMSR	3	32398	Acetyl:2H(3)@Any N-term;Acetyl:2H(3)@K;Oxidation@M	0;7;11	13	13581	13593	27	QE	0.786408	0.82505	0.617706	0.684759	pretrained
RLATVEER	2	32402	Acetyl:2H(3)@Any N-term	0	8	13593	13600	27	QE	0.95475	0.963888	0.828393	0.704434	pretrained
RREEEMMIR	3	32406	Acetyl:2H(3)@Any N-term	0	9	13600	13608	27	QE	0.927347	0.944506	0.786917	0.840359	pretrained
RPNKVLR	2	32407	Acetyl:2H(3)@Any N-term;Acetyl:2H(3)@K	0;4	7	13608	13614	27	QE	0.877935	0.903067	0.71738	0.386087	pretrained
RREEEMMIR	2	32409	Acetyl:2H(3)@Any N-term	0	9	13614	13622	27	QE	0.925684	0.932728	0.765157	0.534824	pretrained
RFSEGTSADREIQR	3	32448	Acetyl:2H(3)@Any N-term	0	14	13622	13635	27	QE	0.402409	0.541585	0.364351	0.603646	pretrained
RGGPPGPPISR	2	32455	Acetyl:2H(3)@Any N-term	0	11	13635	13645	27	QE	0.813432	0.831188	0.624678	0.619512	pretrained
RIADEDRGNWR	3	32489	Acetyl:2H(3)@Any N-term	0	11	13645	13655	27	QE	0.891477	0.920124	0.743825	0.931614	pretrained
RGGPPGPPISR	2	32494	Acetyl:2H(3)@Any N-term	0	11	13655	13665	27	QE	0.859695	0.888991	0.697187	0.578893	pretrained
RGPAEESSSWR	2	32498	Acetyl:2H(3)@Any N-term	0	11	13665	13675	27	QE	0.896281	0.896318	0.707537	0.359944	pretrained
RGLDEDRGSWR	3	32512	Acetyl:2H(3)@Any N-term	0	11	13675	13685	27	QE	0.583074	0.687651	0.482716	0.64015	pretrained
RGPDAVAAPPGGTER	2	32515	Acetyl:2H(3)@Any N-term	0	15	13685	13699	27	QE	0.917308	0.927012	0.755263	0.578503	pretrained
RKKKGGPLR	2	32556	Acetyl:2H(3)@Any N-term;Acetyl:2H(3)@K;Acetyl:2H(3)@K;Acetyl:2H(3)@K	0;2;3;4	9	13699	13707	27	QE	0.918481	0.924082	0.750337	0.614919	pretrained
REKAEGDVAALNRR	3	32572	Acetyl:2H(3)@Any N-term;Acetyl:2H(3)@K	0;3	14	13707	13720	27	QE	0.952313	0.957685	0.81414	0.395031	pretrained
RMGESDDSILR	2	32573	Acetyl:2H(3)@Any N-term;Oxidation@M	0;2	11	13720	13730	27	QE	0.984838	0.986699	0.896052	0.684897	pretrained
RMEELHNQEVQKR	3	32579	Acetyl:2H(3)@Any N-term;Acetyl:2H(3)@K	0;12	13	13730	13742	27	QE	0.889232	0.913682	0.733547	0.599761	pretrained
RMEELHNQEVQKR	3	32580	Acetyl:2H(3)@Any N-term;Oxidation@M;Acetyl:2H(3)@K	0;2;12	13	13742	13754	27	QE	0.871205	0.900796	0.714032	0.76053	pretrained
RMEELHNQEVQKR	2	32585	Acetyl:2H(3)@Any N-term;Acetyl:2H(3)@K	0;12	13	13754	13766	27	QE	0.731864	0.783166	0.572793	0.253419	pretrained
RKELAKDTR	2	32592	Acetyl:2H(3)@Any N-term;Acetyl:2H(3)@K;Acetyl:2H(3)@K	0;2;6	9	13766	13774	27	QE	0.996058	0.99536	0.938647	0.658175	pretrained
RMEELHNQEVQKR	3	32619	Acetyl:2H(3)@Any N-term;Acetyl:2H(3)@K	0;12	13	13774	13786	27	QE	0.870757	0.899437	0.712046	0.588363	pretrained
RPYDLDR	2	32637	Acetyl:2H(3)@Any N-term	0	7	13786	13792	27	QE	0.897153	0.922359	0.747482	0.772609	pretrained
RGLAPNTPGKAR	2	32660	Acetyl:2H(3)@Any N-term;Acetyl:2H(3)@K	0;10	12	13792	13803	27	QE	0.916681	0.930371	0.76103	0.64031	pretrained
RGVDVEAAKR	2	32665	Acetyl:2H(3)@Any N-term;Acetyl:2H(3)@K	0;9	10	13803	13812	27	QE	0.706753	0.763708	0.553247	0.441055	pretrained
RPEIPTEQSR	2	32672	Acetyl:2H(3)@Any N-term	0	10	13812	13821	27	QE	0.887332	0.902257	0.716181	0.480952	pretrained
RGGGGTELGPPAPPRPR	3	32685	Acetyl:2H(3)@Any N-term	0	17	13821	13837	27	QE	0.792257	0.820125	0.612193	0.396703	pretrained
RLSYNTASNKTR	2	32756	Acetyl:2H(3)@Any N-term;Acetyl:2H(3)@K	0;10	12	13837	13848	27	QE	0.860344	0.859956	0.659018	0.11494	pretrained
RMGESDDSILR	2	32767	Acetyl:2H(3)@Any N-term;Oxidation@M	0;2	11	13848	13858	27	QE	0.525809	0.589141	0.401067	0.321107	pretrained
REAEANRRPLPELVR	4	32800	Acetyl:2H(3)@Any N-term	0	15	13858	13872	27	QE	0.94288	0.948873	0.79555	0.593985	pretrained
RATGNLSASCGSALR	2	32801	Acetyl:2H(3)@Any N-term;Carbamidomethyl@C	0;10	15	13872	13886	27	QE	0.889142	0.898764	0.711068	0.190431	pretrained
RRQEQIQAMPLADSQAVR	3	32817	Acetyl:2H(3)@Any N-term;Oxidation@M	0;9	18	13886	13903	27	QE	0.950398	0.953748	0.805621	0.784575	pretrained
RQVDQLTNDKAR	2	32895	Acetyl:2H(3)@Any N-term;Acetyl:2H(3)@K	0;10	12	13903	13914	27	QE	0.867383	0.889544	0.697956	0.447146	pretrained
RTEITIVKPQESAHRR	4	32922	Acetyl:2H(3)@Any N-term;Acetyl:2H(3)@K	0;8	16	13914	13929	27	QE	0.903524	0.915789	0.736867	0.824868	pretrained
RSPAKTIAPQNAPR	2	32939	Acetyl:2H(3)@Any N-term;Acetyl:2H(3)@K	0;5	14	13929	13942	27	QE	0.498139	0.564016	0.381489	0.341117	pretrained
RAQEEAKEAEMSR	3	32962	Acetyl:2H(3)@Any N-term;Acetyl:2H(3)@K	0;7	13	13942	13954	27	QE	0.941437	0.952264	0.802503	0.77779	pretrained
RAQEEAKEAEMSR	2	32963	Acetyl:2H(3)@Any N-term;Acetyl:2H(3)@K	0;7	13	13954	13966	27	QE	0.8842	0.911096	0.729525	0.745929	pretrained
RTKNETDEDGWTTVRR	3	32972	Acetyl:2H(3)@Any N-term;Acetyl:2H(3)@K	0;3	16	13966	13981	27	QE	0.963879	0.966156	0.833902	0.583579	pretrained
RLDALSR	2	32980	Acetyl:2H(3)@Any N-term	0	7	13981	13987	27	QE	0.825816	0.860828	0.660108	0.71	pretrained
RQVDQLTNDKAR	2	32982	Acetyl:2H(3)@Any N-term;Acetyl:2H(3)@K	0;10	12	13987	13998	27	QE	0.906554	0.918673	0.741477	0.476251	pretrained
RLLVTR	2	33004	Acetyl:2H(3)@Any N-term	0	6	13998	14003	27	QE	0.974075	0.981161	0.876231	0.889474	pretrained
RGANPKIYEGAAR	2	33056	Acetyl:2H(3)@Any N-term;Acetyl:2H(3)@K	0;6	13	14003	14015	27	QE	0.920136	0.933279	0.766132	0.399208	pretrained
RFVEVGR	2	33065	Acetyl:2H(3)@Any N-term	0	7	14015	14021	27	QE	0.260713	0.469481	0.311118	0.303913	pretrained
RLESKIR	2	33067	Acetyl:2H(3)@Any N-term;Acetyl:2H(3)@K	0;5	7	14021	14027	27	QE	0.938376	0.94402	0.785978	0.695652	pretrained
RFVEVGR	2	33100	Acetyl:2H(3)@Any N-term	0	7	14027	14033	27	QE	0.264854	0.484487	0.321987	0.199565	pretrained
RLLAKAR	2	33206	Acetyl:2H(3)@Any N-term;Acetyl:2H(3)@K	0;5	7	14033	14039	27	QE	0.865882	0.893216	0.703114	0.656522	pretrained
RDEEKKETKETKSKER	3	33214	Acetyl:2H(3)@Any N-term;Acetyl:2H(3)@K;Acetyl:2H(3)@K;Acetyl:2H(3)@K;Acetyl:2H(3)@K;Acetyl:2H(3)@K	0;5;6;9;12;14	16	14039	14054	27	QE	0.96837	0.973416	0.852879	0.52848	pretrained
RRLEEVKLKR	3	33229	Acetyl:2H(3)@Any N-term;Acetyl:2H(3)@K;Acetyl:2H(3)@K	0;7;9	10	14054	14063	27	QE	0.93242	0.939344	0.777129	0.56834	pretrained
RSLLTKR	2	33275	Acetyl:2H(3)@Any N-term;Acetyl:2H(3)@K	0;6	7	14063	14069	27	QE	0.95949	0.968364	0.839441	0.732174	pretrained
RQKFGYSVNR	2	33338	Acetyl:2H(3)@Any N-term;Acetyl:2H(3)@K	0;3	10	14069	14078	27	QE	0.887059	0.885104	0.691826	0.419691	pretrained
RVQEAAAAAAAR	2	33378	Acetyl:2H(3)@Any N-term	0	12	14078	14089	27	QE	0.832105	0.821778	0.614036	-0.414588	pretrained
RMGESDDSILR	2	33387	Acetyl:2H(3)@Any N-term	0	11	14089	14099	27	QE	0.931864	0.938147	0.774919	0.722326	pretrained
RVEIMEEESEQ	2	33396	Acetyl:2H(3)@Any N-term;Oxidation@M	0;5	11	14099	14109	27	QE	0.977294	0.97848	0.867689	0.770075	pretrained
RHEQMKKNLEAQHKELEEKR	4	33401	Acetyl:2H(3)@Any N-term;Acetyl:2H(3)@K;Acetyl:2H(3)@K;Acetyl:2H(3)@K;Acetyl:2H(3)@K	0;6;7;14;19	20	14109	14128	27	QE	0.612238	0.688478	0.483442	0.396405	pretrained
RRQEQIQAMPLADSQAVR	3	33430	Acetyl:2H(3)@Any N-term;Oxidation@M	0;9	18	14128	14145	27	QE	0.941371	0.94667	0.791151	0.666069	pretrained
RRQEQIQAMPLADSQAVR	3	33431	Acetyl:2H(3)@Any N-term	0	18	14145	14162	27	QE	0.933791	0.941456	0.781083	0.747967	pretrained
RKESTDEILGR	2	33456	Acetyl:2H(3)@Any N-term;Acetyl:2H(3)@K	0;2	11	14162	14172	27	QE	0.907912	0.928321	0.757496	0.818386	pretrained
RRKEYDALKAAKR	3	33458	Acetyl:2H(3)@Any N-term;Acetyl:2H(3)@K;Acetyl:2H(3)@K;Acetyl:2H(3)@K	0;3;9;12	13	14172	14184	27	QE	0.592503	0.649023	0.449644	0.217651	pretrained
RRPGASPTGETPTIEEGEEDEDEASEAEGAR	3	33481	Acetyl:2H(3)@Any N-term	0	31	14184	14214	27	QE	0.794402	0.81431	0.605769	0.453316	pretrained
RMGESDDSILR	2	33484	Acetyl:2H(3)@Any N-term	0	11	14214	14224	27	QE	0.888858	0.913162	0.732734	0.868199	pretrained
RLAQLKSER	2	33502	Acetyl:2H(3)@Any N-term;Acetyl:2H(3)@K	0;6	9	14224	14232	27	QE	0.90774	0.903935	0.718669	0.385447	pretrained
RQLGLVPR	2	33511	Acetyl:2H(3)@Any N-term	0	8	14232	14239	27	QE	0.83748	0.86501	0.665376	0.591407	pretrained
RIEYIEAR	2	33519	Acetyl:2H(3)@Any N-term	0	8	14239	14246	27	QE	0.969372	0.975844	0.859787	0.926108	pretrained
RSQALEKLGR	2	33522	Acetyl:2H(3)@Any N-term;Acetyl:2H(3)@K	0;7	10	14246	14255	27	QE	0.793498	0.84056	0.635547	0.519691	pretrained
RKLLQAAR	2	33551	Acetyl:2H(3)@Any N-term;Acetyl:2H(3)@K	0;2	8	14255	14262	27	QE	0.899979	0.910465	0.728552	0.643952	pretrained
RPQYSNPPVQGEVMEGADNQGAGEQGRPVRQNMYR	4	33552	Acetyl:2H(3)@Any N-term	0	35	14262	14296	27	QE	0.980914	0.981332	0.876798	0.766135	pretrained
RSKKEQVPSGAELER	2	33555	Acetyl:2H(3)@Any N-term;Acetyl:2H(3)@K;Acetyl:2H(3)@K	0;3;4	15	14296	14310	27	QE	0.915162	0.922016	0.746918	0.475598	pretrained
REKKAALEKER	3	33590	Acetyl:2H(3)@Any N-term;Acetyl:2H(3)@K;Acetyl:2H(3)@K;Acetyl:2H(3)@K	0;3;4;9	11	14310	14320	27	QE	0.754656	0.80445	0.595079	0.754784	pretrained
REKKAALEKER	2	33592	Acetyl:2H(3)@Any N-term;Acetyl:2H(3)@K;Acetyl:2H(3)@K;Acetyl:2H(3)@K	0;3;4;9	11	14320	14330	27	QE	0.826873	0.845922	0.641898	0.232739	pretrained
REAKVKFEER	3	33729	Acetyl:2H(3)@Any N-term;Acetyl:2H(3)@K;Acetyl:2H(3)@K	0;4;6	10	14330	14339	27	QE	0.896983	0.917374	0.739391	0.908365	pretrained
RQELEEKIR	2	33751	Acetyl:2H(3)@Any N-term;Acetyl:2H(3)@K	0;7	9	14339	14347	27	QE	0.869755	0.868567	0.669917	0.630499	pretrained
REAKVKFEER	2	33775	Acetyl:2H(3)@Any N-term;Acetyl:2H(3)@K;Acetyl:2H(3)@K	0;4;6	10	14347	14356	27	QE	0.945788	0.951124	0.800139	0.912484	pretrained
RKEYDALKAAKR	3	33807	Acetyl:2H(3)@Any N-term;Acetyl:2H(3)@K;Acetyl:2H(3)@K;Acetyl:2H(3)@K	0;2;8;11	12	14356	14367	27	QE	0.95429	0.961331	0.822382	0.511135	pretrained
RKEYDALKAAKR	2	33820	Acetyl:2H(3)@Any N-term;Acetyl:2H(3)@K;Acetyl:2H(3)@K;Acetyl:2H(3)@K	0;2;8;11	12	14367	14378	27	QE	0.941024	0.947259	0.792319	0.146018	pretrained
REAQKELQEKVR	2	33880	Acetyl:2H(3)@Any N-term;Acetyl:2H(3)@K;Acetyl:2H(3)@K	0;5;10	12	14378	14389	27	QE	0.84958	0.881062	0.686342	0.390486	pretrained
REAQKELQEKVR	3	33884	Acetyl:2H(3)@Any N-term;Acetyl:2H(3)@K;Acetyl:2H(3)@K	0;5;10	12	14389	14400	27	QE	0.961973	0.969892	0.843387	0.875758	pretrained
RYLENGKETLQR	2	33914	Acetyl:2H(3)@Any N-term;Acetyl:2H(3)@K	0;7	12	14400	14411	27	QE	0.953572	0.965126	0.831378	0.850599	pretrained
RKVASMAPVTAEGFQER	3	33930	Acetyl:2H(3)@Any N-term;Acetyl:2H(3)@K;Oxidation@M	0;2;6	17	14411	14427	27	QE	0.859256	0.881071	0.686353	0.642125	pretrained
REELAPYPKSKKAVSR	3	33955	Acetyl:2H(3)@Any N-term;Acetyl:2H(3)@K;Acetyl:2H(3)@K;Acetyl:2H(3)@K	0;9;11;12	16	14427	14442	27	QE	0.55089	0.599885	0.409574	0.464712	pretrained
REPVPFPSGSAGPGPR	2	33964	Acetyl:2H(3)@Any N-term	0	16	14442	14457	27	QE	0.885183	0.901313	0.714791	0.621673	pretrained
RGPLAGLGPGSTPR	2	33977	Acetyl:2H(3)@Any N-term	0	14	14457	14470	27	QE	0.836526	0.855617	0.653643	0.383249	pretrained
RDLIQDQNMDEKGKQR	3	34073	Acetyl:2H(3)@Any N-term;Acetyl:2H(3)@K;Acetyl:2H(3)@K	0;12;14	16	14470	14485	27	QE	0.94594	0.956398	0.811315	0.779661	pretrained
RLISPYKKKQR	3	34152	Acetyl:2H(3)@Any N-term;Acetyl:2H(3)@K;Acetyl:2H(3)@K;Acetyl:2H(3)@K	0;7;8;9	11	14485	14495	27	QE	0.832244	0.862077	0.661673	0.745122	pretrained
RVAAALPGMESTQDR	2	34156	Acetyl:2H(3)@Any N-term	0	15	14495	14509	27	QE	0.972774	0.975726	0.859444	0.49542	pretrained
RTTYLVLDEADR	3	34200	Acetyl:2H(3)@Any N-term	0	12	14509	14520	27	QE	0.536865	0.613142	0.420189	0.472798	pretrained
REELAPYPKSKKAVSR	3	34253	Acetyl:2H(3)@Any N-term;Acetyl:2H(3)@K;Acetyl:2H(3)@K;Acetyl:2H(3)@K	0;9;11;12	16	14520	14535	27	QE	0.879644	0.891962	0.701343	0.752126	pretrained
REELAPYPKSKKAVSR	2	34268	Acetyl:2H(3)@Any N-term;Acetyl:2H(3)@K;Acetyl:2H(3)@K;Acetyl:2H(3)@K	0;9;11;12	16	14535	14550	27	QE	0.559191	0.607527	0.415677	0.575438	pretrained
RADSLQKNQDLEFER	3	34311	Acetyl:2H(3)@Any N-term;Acetyl:2H(3)@K	0;7	15	14550	14564	27	QE	0.959898	0.967824	0.838068	0.799932	pretrained
RADSLQKNQDLEFER	2	34313	Acetyl:2H(3)@Any N-term;Acetyl:2H(3)@K	0;7	15	14564	14578	27	QE	0.971997	0.974265	0.855258	0.742994	pretrained
RVEIMEEESEQ	2	34481	Acetyl:2H(3)@Any N-term	0	11	14578	14588	27	QE	0.968189	0.972545	0.850478	0.772326	pretrained
RDCQEQAKIAVEAQNKYER	3	34608	Acetyl:2H(3)@Any N-term;Carbamidomethyl@C;Acetyl:2H(3)@K;Acetyl:2H(3)@K	0;3;8;16	19	14588	14606	27	QE	0.824432	0.854138	0.65183	0.682665	pretrained
RLDLPIER	2	34622	Acetyl:2H(3)@Any N-term	0	8	14606	14613	27	QE	0.939534	0.952817	0.803658	0.773673	pretrained
RKEYDALKAAKR	2	34638	Acetyl:2H(3)@Any N-term;Acetyl:2H(3)@K;Acetyl:2H(3)@K;Acetyl:2H(3)@K	0;2;8;11	12	14613	14624	27	QE	0.96434	0.964917	0.830871	0.698309	pretrained
RKEYDALKAAKR	3	34646	Acetyl:2H(3)@Any N-term;Acetyl:2H(3)@K;Acetyl:2H(3)@K;Acetyl:2H(3)@K	0;2;8;11	12	14624	14635	27	QE	0.954925	0.961788	0.823442	0.741297	pretrained
RVLQQFADNDVSR	2	34764	Acetyl:2H(3)@Any N-term	0	13	14635	14647	27	QE	0.981743	0.983832	0.885368	0.703865	pretrained
RLEAGAMVLADR	3	34791	Acetyl:2H(3)@Any N-term	0	12	14647	14658	27	QE	0.975893	0.979934	0.872252	0.712826	pretrained
RLDFDYKKKR	2	34893	Acetyl:2H(3)@Any N-term;Acetyl:2H(3)@K;Acetyl:2H(3)@K;Acetyl:2H(3)@K	0;7;8;9	10	14658	14667	27	QE	0.928279	0.939944	0.778245	0.707207	pretrained
RLDFDYKKKR	3	34894	Acetyl:2H(3)@Any N-term;Acetyl:2H(3)@K;Acetyl:2H(3)@K;Acetyl:2H(3)@K	0;7;8;9	10	14667	14676	27	QE	0.884137	0.905267	0.720658	0.744273	pretrained
RKVASMAPVTAEGFQER	3	34898	Acetyl:2H(3)@Any N-term;Acetyl:2H(3)@K	0;2	17	14676	14692	27	QE	0.957835	0.963274	0.826932	0.693773	pretrained
RKVASMAPVTAEGFQER	2	34899	Acetyl:2H(3)@Any N-term;Acetyl:2H(3)@K	0;2	17	14692	14708	27	QE	0.948341	0.955201	0.808722	0.639583	pretrained
RFKAADLNGDLTATR	2	34926	Acetyl:2H(3)@Any N-term;Acetyl:2H(3)@K	0;3	15	14708	14722	27	QE	0.869098	0.884138	0.690506	0.25745	pretrained
RFKAADLNGDLTATR	3	34927	Acetyl:2H(3)@Any N-term;Acetyl:2H(3)@K	0;3	15	14722	14736	27	QE	0.93358	0.945321	0.788503	0.641729	pretrained
REFEVYGPIKR	3	34935	Acetyl:2H(3)@Any N-term;Acetyl:2H(3)@K	0;10	11	14736	14746	27	QE	0.975576	0.980365	0.873635	0.83152	pretrained
REFEVYGPIKR	2	34937	Acetyl:2H(3)@Any N-term;Acetyl:2H(3)@K	0;10	11	14746	14756	27	QE	0.903793	0.927235	0.755643	0.706191	pretrained
RCLYASVLTAQPR	2	35001	Acetyl:2H(3)@Any N-term;Carbamidomethyl@C	0;2	13	14756	14768	27	QE	0.837149	0.875264	0.678625	0.707718	pretrained
RQQQEEDEQETAALLEEAR	3	35049	Acetyl:2H(3)@Any N-term	0	19	14768	14786	27	QE	0.953443	0.963578	0.827653	0.773378	pretrained
RVAQDWLKEAR	2	35070	Acetyl:2H(3)@Any N-term;Acetyl:2H(3)@K	0;8	11	14786	14796	27	QE	0.979217	0.98188	0.878625	0.903846	pretrained
RLQDFLR	2	35097	Acetyl:2H(3)@Any N-term	0	7	14796	14802	27	QE	0.944349	0.957479	0.813685	0.986087	pretrained
RAKEADQLKQDLQEAR	3	35161	Acetyl:2H(3)@Any N-term;Acetyl:2H(3)@K;Acetyl:2H(3)@K	0;3;9	16	14802	14817	27	QE	0.962512	0.968259	0.839173	0.697166	pretrained
RASQGLLSSIENSESDSSEAKEEGSR	3	35194	Acetyl:2H(3)@Any N-term;Acetyl:2H(3)@K	0;21	26	14817	14842	27	QE	0.967262	0.973729	0.853752	0.93916	pretrained
RLNEIEAALR	2	35218	Acetyl:2H(3)@Any N-term	0	10	14842	14851	27	QE	0.954549	0.96414	0.828997	0.73758	pretrained
RLSEDYGVLKTDEGIAYR	3	35248	Acetyl:2H(3)@Any N-term;Acetyl:2H(3)@K	0;10	18	14851	14868	27	QE	0.791526	0.821612	0.61385	0.598695	pretrained
RIILLAEGR	2	35261	Acetyl:2H(3)@Any N-term	0	9	14868	14876	27	QE	0.902974	0.924604	0.751207	0.691532	pretrained
RAEDGSVIDYELIDQDAR	3	35400	Acetyl:2H(3)@Any N-term	0	18	14876	14893	27	QE	0.685683	0.728082	0.519176	0.31683	pretrained
RVPFSLLR	2	35462	Acetyl:2H(3)@Any N-term	0	8	14893	14900	27	QE	0.914196	0.934733	0.768722	0.810892	pretrained
RVPFSLLR	2	35512	Acetyl:2H(3)@Any N-term	0	8	14900	14907	27	QE	0.896626	0.921618	0.746265	0.740285	pretrained
RVPFSLLR	2	35555	Acetyl:2H(3)@Any N-term	0	8	14907	14914	27	QE	0.912947	0.930205	0.760741	0.604543	pretrained
RDTVEVALEDKGDSTFR	2	35691	Acetyl:2H(3)@Any N-term;Acetyl:2H(3)@K	0;11	17	14914	14930	27	QE	0.971193	0.975061	0.857525	0.653365	pretrained
RDTVEVALEDKGDSTFR	3	35699	Acetyl:2H(3)@Any N-term;Acetyl:2H(3)@K	0;11	17	14930	14946	27	QE	0.967461	0.972805	0.851192	0.858723	pretrained
RLGEWDLPEAVQR	2	35729	Acetyl:2H(3)@Any N-term	0	13	14946	14958	27	QE	0.950609	0.958159	0.815191	0.843302	pretrained
RSVMDATQIAGLNCLR	3	35781	Acetyl:2H(3)@Any N-term;Carbamidomethyl@C	0;14	16	14958	14973	27	QE	0.9849	0.987008	0.897269	0.784968	pretrained
RAGIKVTVAGLAGKDPVQCSR	3	35873	Acetyl:2H(3)@Any N-term;Acetyl:2H(3)@K;Acetyl:2H(3)@K;Carbamidomethyl@C	0;5;14;19	21	14973	14993	27	QE	0.97724	0.980089	0.872749	0.780391	pretrained
RAPKTLSSFFTPR	2	35881	Acetyl:2H(3)@Any N-term;Acetyl:2H(3)@K	0;4	13	14993	15005	27	QE	0.8031	0.842048	0.637301	0.606274	pretrained
RKKEEQVIQVWNKKNANEKGR	4	35946	Acetyl:2H(3)@Any N-term;Acetyl:2H(3)@K;Acetyl:2H(3)@K;Acetyl:2H(3)@K;Acetyl:2H(3)@K;Acetyl:2H(3)@K	0;2;3;13;14;19	21	15005	15025	27	QE	0.798501	0.837447	0.631906	0.345769	pretrained
RTETTVKKVVKTVTTR	3	35970	Acetyl:2H(3)@Any N-term;Acetyl:2H(3)@K;Acetyl:2H(3)@K;Acetyl:2H(3)@K	0;7;8;11	16	15025	15040	27	QE	0.881422	0.901533	0.715114	0.545763	pretrained
RPVNLDSALAALR	2	36038	Acetyl:2H(3)@Any N-term	0	13	15040	15052	27	QE	0.785738	0.82044	0.612543	0.604592	pretrained
RLLSRPQDALEGVVLSPSLEAR	3	36137	Acetyl:2H(3)@Any N-term	0	22	15052	15073	27	QE	0.949547	0.953395	0.804875	0.870609	pretrained
RTEKKLKDVLLQVDDERR	3	36201	Acetyl:2H(3)@Any N-term;Acetyl:2H(3)@K;Acetyl:2H(3)@K;Acetyl:2H(3)@K	0;4;5;7	18	15073	15090	27	QE	0.446238	0.550287	0.370963	0.0631371	pretrained
REFQLDLDEIENDNGTVR	3	36222	Acetyl:2H(3)@Any N-term	0	18	15090	15107	27	QE	0.985548	0.987971	0.901155	0.714796	pretrained
RTEKKLKDVLLQVDDERR	3	36342	Acetyl:2H(3)@Any N-term;Acetyl:2H(3)@K;Acetyl:2H(3)@K;Acetyl:2H(3)@K	0;4;5;7	18	15107	15124	27	QE	0.773232	0.811511	0.60271	-0.150761	pretrained
RLLEDGEDFNLGDALDSSNSMQTIQKTTTRR	4	36458	Acetyl:2H(3)@Any N-term;Acetyl:2H(3)@K	0;26	31	15124	15154	27	QE	0.937726	0.944097	0.786127	0.743541	pretrained
RGGPPFAFVEFEDPRDAEDAVYGR	3	36504	Acetyl:2H(3)@Any N-term	0	24	15154	15177	27	QE	0.916489	0.917974	0.740352	0.618012	pretrained
RLTLEDLEDSWDRGIPR	3	36525	Acetyl:2H(3)@Any N-term	0	17	15177	15193	27	QE	0.956263	0.963084	0.82648	0.638233	pretrained
RLTAIIEEAEEAPGARPQLQDAWR	3	36556	Acetyl:2H(3)@Any N-term	0	24	15193	15216	27	QE	0.947984	0.95012	0.79808	0.726623	pretrained
RLTAIIEEAEEAPGARPQLQDAWR	4	36563	Acetyl:2H(3)@Any N-term	0	24	15216	15239	27	QE	0.980379	0.982551	0.880899	0.698835	pretrained
RFDEILEASDGIMVAR	2	36596	Acetyl:2H(3)@Any N-term	0	16	15239	15254	27	QE	0.972574	0.976869	0.862806	0.821562	pretrained
RFQMIPLDPKGTSQNDPNWVVR	3	36692	Acetyl:2H(3)@Any N-term;Acetyl:2H(3)@K	0;10	22	15254	15275	27	QE	0.976723	0.978811	0.868715	0.761274	pretrained
RSTCTINYSKDLPLAQGIKFQ	3	36711	Acetyl:2H(3)@Any N-term;Carbamidomethyl@C;Acetyl:2H(3)@K;Acetyl:2H(3)@K	0;4;10;19	21	15275	15295	27	QE	0.568773	0.62723	0.431623	0.146683	pretrained
RVLSGEFQIVNPHLLKDLTER	3	36878	Acetyl:2H(3)@Any N-term;Acetyl:2H(3)@K	0;16	21	15295	15315	27	QE	0.953443	0.962501	0.825107	0.666116	pretrained
RVVPLVQMGETDANVAKFLNR	3	36999	Acetyl:2H(3)@Any N-term;Acetyl:2H(3)@K	0;17	21	15315	15335	27	QE	0.501701	0.563563	0.38114	0.440413	pretrained
RFFNKEFLSKPKA	3	37033	Acetyl:2H(3)@Any N-term;Acetyl:2H(3)@K;Acetyl:2H(3)@K;Acetyl:2H(3)@K	0;5;10;12	13	15335	15347	27	QE	0.722683	0.758372	0.54801	0.255102	pretrained
RFFNKEFLSKPKA	2	37034	Acetyl:2H(3)@Any N-term;Acetyl:2H(3)@K;Acetyl:2H(3)@K;Acetyl:2H(3)@K	0;5;10;12	13	15347	15359	27	QE	0.977526	0.979098	0.869609	0.620441	pretrained
RILQSLEKMSSPLADAKR	3	37086	Acetyl:2H(3)@Any N-term;Acetyl:2H(3)@K;Acetyl:2H(3)@K	0;8;17	18	15359	15376	27	QE	0.751661	0.789231	0.579041	0.77568	pretrained
RADVLAFPSSGFTDLAEIVSR	3	37507	Acetyl:2H(3)@Any N-term	0	21	15376	15396	27	QE	0.960683	0.965728	0.832848	0.770511	pretrained
RRGKNENESEKR	3	37674	Acetyl:2H(3)@Any N-term;Acetyl:2H(3)@K;Acetyl:2H(3)@K	0;4;11	12	15396	15407	27	QE	0.795398	0.823366	0.615813	0.623044	pretrained
RSQQGPRKEPR	3	37685	Acetyl:2H(3)@Any N-term;Acetyl:2H(3)@K	0;8	11	15407	15417	27	QE	0.956255	0.957127	0.81291	0.486867	pretrained
RHQEGKVSDER	3	37690	Acetyl:2H(3)@Any N-term;Acetyl:2H(3)@K	0;6	11	15417	15427	27	QE	0.964764	0.970941	0.846151	0.857317	pretrained
RREMAKEAKR	3	37718	Acetyl:2H(3)@Any N-term;Oxidation@M;Acetyl:2H(3)@K;Acetyl:2H(3)@K	0;4;6;9	10	15427	15436	27	QE	0.928491	0.935311	0.769761	0.582754	pretrained
RPSQGPPAR	2	37725	Acetyl:2H(3)@Any N-term	0	9	15436	15444	27	QE	0.817595	0.850581	0.6475	0.421188	pretrained
RQGPGGGAPAASR	2	37736	Acetyl:2H(3)@Any N-term	0	13	15444	15456	27	QE	0.795305	0.823943	0.616461	0.267423	pretrained
RKPAMTTPTRR	3	37789	Acetyl:2H(3)@Any N-term;Acetyl:2H(3)@K;Oxidation@M	0;2;5	11	15456	15466	27	QE	0.930848	0.938076	0.774787	0.368856	pretrained
RSNSTTQVSQPR	2	37791	Acetyl:2H(3)@Any N-term	0	12	15466	15477	27	QE	0.770446	0.806202	0.596962	0.354123	pretrained
RSKTKEAR	2	37793	Acetyl:2H(3)@Any N-term;Acetyl:2H(3)@K;Acetyl:2H(3)@K	0;3;5	8	15477	15484	27	QE	0.870214	0.888115	0.695971	0.597701	pretrained
REDYVGGQSHR	3	37797	Acetyl:2H(3)@Any N-term	0	11	15484	15494	27	QE	0.908704	0.92117	0.74553	0.325422	pretrained
RRPTKSKGSKSSR	3	37815	Acetyl:2H(3)@Any N-term;Acetyl:2H(3)@K;Acetyl:2H(3)@K;Acetyl:2H(3)@K	0;5;7;10	13	15494	15506	27	QE	0.884021	0.895739	0.706706	0.176183	pretrained
RYPSGEER	2	37845	Acetyl:2H(3)@Any N-term	0	8	15506	15513	27	QE	0.92465	0.941719	0.78158	0.51642	pretrained
RIETDERDSTNR	3	37848	Acetyl:2H(3)@Any N-term	0	12	15513	15524	27	QE	0.946709	0.951511	0.800939	0.607259	pretrained
RSASASHQADIKEARR	4	37876	Acetyl:2H(3)@Any N-term;Acetyl:2H(3)@K	0;12	16	15524	15539	27	QE	0.887981	0.907141	0.72348	0.545179	pretrained
RRPGAALEDSR	3	37884	Acetyl:2H(3)@Any N-term	0	11	15539	15549	27	QE	0.976795	0.978185	0.866782	0.448499	pretrained
RMEELHNQEMQKR	3	37893	Acetyl:2H(3)@Any N-term;Oxidation@M;Oxidation@M;Acetyl:2H(3)@K	0;2;10;12	13	15549	15561	27	QE	0.964513	0.972134	0.849359	0.816815	pretrained
RPFQAQCGHR	3	37904	Acetyl:2H(3)@Any N-term;Carbamidomethyl@C	0;7	10	15561	15570	27	QE	0.844437	0.879762	0.684597	0.70399	pretrained
RTPRPLTSAR	3	37917	Acetyl:2H(3)@Any N-term	0	10	15570	15579	27	QE	0.854509	0.887306	0.694851	0.872458	pretrained
RDHFEEAMR	3	37981	Acetyl:2H(3)@Any N-term;Oxidation@M	0;8	9	15579	15587	27	QE	0.945104	0.953368	0.804818	0.845491	pretrained
RAEKLR	2	38036	Acetyl:2H(3)@Any N-term;Acetyl:2H(3)@K	0;4	6	15587	15592	27	QE	0.961265	0.969415	0.842143	0.690226	pretrained
RATTDLGR	2	38041	Acetyl:2H(3)@Any N-term	0	8	15592	15599	27	QE	0.897449	0.911906	0.730778	0.72578	pretrained
RQQVLDR	2	38043	Acetyl:2H(3)@Any N-term	0	7	15599	15605	27	QE	0.916411	0.931386	0.762799	0.929565	pretrained
RPENMKR	2	38050	Acetyl:2H(3)@Any N-term;Acetyl:2H(3)@K	0;6	7	15605	15611	27	QE	0.92845	0.941531	0.781225	0.775217	pretrained
RREMAKEAKR	3	38078	Acetyl:2H(3)@Any N-term;Acetyl:2H(3)@K;Acetyl:2H(3)@K	0;6;9	10	15611	15620	27	QE	0.857888	0.876021	0.679623	0.32471	pretrained
RGKSGFNSKSGQR	3	38081	Acetyl:2H(3)@Any N-term;Acetyl:2H(3)@K;Acetyl:2H(3)@K	0;3;9	13	15620	15632	27	QE	0.888925	0.901736	0.715414	0.62728	pretrained
RPYEKGR	2	38087	Acetyl:2H(3)@Any N-term;Acetyl:2H(3)@K	0;5	7	15632	15638	27	QE	0.886408	0.914028	0.734089	0.461739	pretrained
RQQVLDR	2	38089	Acetyl:2H(3)@Any N-term	0	7	15638	15644	27	QE	0.987229	0.988906	0.905084	0.907826	pretrained
REAEADKPR	2	38096	Acetyl:2H(3)@Any N-term;Acetyl:2H(3)@K	0;7	9	15644	15652	27	QE	0.955035	0.961128	0.821914	0.764479	pretrained
RAENLKR	2	38105	Acetyl:2H(3)@Any N-term;Acetyl:2H(3)@K	0;6	7	15652	15658	27	QE	0.96132	0.966618	0.835045	0.723044	pretrained
RPYEKGR	2	38114	Acetyl:2H(3)@Any N-term;Acetyl:2H(3)@K	0;5	7	15658	15664	27	QE	0.880385	0.908938	0.726211	0.745217	pretrained
RIPAEGR	2	38121	Acetyl:2H(3)@Any N-term	0	7	15664	15670	27	QE	0.908898	0.934888	0.769001	0.909565	pretrained
RAEGIKSGR	2	38150	Acetyl:2H(3)@Any N-term;Acetyl:2H(3)@K	0;6	9	15670	15678	27	QE	0.828301	0.87739	0.681435	0.417705	pretrained
RIPAEGR	2	38164	Acetyl:2H(3)@Any N-term	0	7	15678	15684	27	QE	0.59285	0.683285	0.478899	0.703478	pretrained
REPLPSR	2	38182	Acetyl:2H(3)@Any N-term	0	7	15684	15690	27	QE	0.904815	0.928282	0.757428	0.766957	pretrained
RREGKTDYYAR	3	38191	Acetyl:2H(3)@Any N-term;Acetyl:2H(3)@K	0;5	11	15690	15700	27	QE	0.739439	0.786456	0.576173	0.51454	pretrained
REPIQASTAR	2	38219	Acetyl:2H(3)@Any N-term	0	10	15700	15709	27	QE	0.948915	0.960262	0.819928	0.694595	pretrained
RMEELHNQEVQKR	3	38225	Acetyl:2H(3)@Any N-term;Oxidation@M;Acetyl:2H(3)@K	0;2;12	13	15709	15721	27	QE	0.963162	0.971012	0.846341	0.949685	pretrained
RTAQEVETYRR	3	38227	Acetyl:2H(3)@Any N-term	0	11	15721	15731	27	QE	0.894449	0.915556	0.736498	0.565947	pretrained
RGPAAPPGDKGR	2	38232	Acetyl:2H(3)@Any N-term;Acetyl:2H(3)@K	0;10	12	15731	15742	27	QE	0.903563	0.917926	0.740275	0.645455	pretrained
RDSPLQGSGQQNSQAGQR	3	38238	Acetyl:2H(3)@Any N-term	0	18	15742	15759	27	QE	0.879194	0.905269	0.720662	0.679009	pretrained
RADKKPARGQKPEQR	3	38242	Acetyl:2H(3)@Any N-term;Acetyl:2H(3)@K;Acetyl:2H(3)@K;Acetyl:2H(3)@K	0;4;5;11	15	15759	15773	27	QE	0.77607	0.796985	0.587146	0.569583	pretrained
RADKKPARGQKPEQR	4	38253	Acetyl:2H(3)@Any N-term;Acetyl:2H(3)@K;Acetyl:2H(3)@K;Acetyl:2H(3)@K	0;4;5;11	15	15773	15787	27	QE	0.925093	0.931125	0.762342	0.942242	pretrained
RGGADVNIR	2	38255	Acetyl:2H(3)@Any N-term	0	9	15787	15795	27	QE	0.747936	0.795874	0.585976	0.565433	pretrained
RKMQDKCR	2	38260	Acetyl:2H(3)@Any N-term;Acetyl:2H(3)@K;Acetyl:2H(3)@K;Carbamidomethyl@C	0;2;6;7	8	15795	15802	27	QE	0.913227	0.927961	0.75688	0.851669	pretrained
RRNPAGSVVMER	3	38264	Acetyl:2H(3)@Any N-term	0	12	15802	15813	27	QE	0.900794	0.920487	0.744415	0.554193	pretrained
RVEVNGEHATVR	3	38277	Acetyl:2H(3)@Any N-term	0	12	15813	15824	27	QE	0.929117	0.944565	0.787032	0.806836	pretrained
RPGEKTYTQR	2	38298	Acetyl:2H(3)@Any N-term;Acetyl:2H(3)@K	0;5	10	15824	15833	27	QE	0.705331	0.761201	0.55078	0.617761	pretrained
RPGEKTYTQR	3	38302	Acetyl:2H(3)@Any N-term;Acetyl:2H(3)@K	0;5	10	15833	15842	27	QE	0.774146	0.821121	0.613302	0.868855	pretrained
RVIAKR	2	38312	Acetyl:2H(3)@Any N-term;Acetyl:2H(3)@K	0;5	6	15842	15847	27	QE	0.918555	0.94179	0.781716	0.765414	pretrained
RMEELHNQEMQKR	3	38315	Acetyl:2H(3)@Any N-term;Oxidation@M;Acetyl:2H(3)@K	0;2;12	13	15847	15859	27	QE	0.863009	0.893224	0.703125	0.599761	pretrained
RMEELHNQEMQKR	3	38319	Acetyl:2H(3)@Any N-term;Oxidation@M;Oxidation@M;Acetyl:2H(3)@K	0;2;10;12	13	15859	15871	27	QE	0.917139	0.934837	0.76891	0.816815	pretrained
RPGEKTYTQR	2	38331	Acetyl:2H(3)@Any N-term;Acetyl:2H(3)@K	0;5	10	15871	15880	27	QE	0.799594	0.83136	0.624874	0.371686	pretrained
RQEGGKAPASSLHTQEAGR	3	38336	Acetyl:2H(3)@Any N-term;Acetyl:2H(3)@K	0;6	19	15880	15898	27	QE	0.762677	0.80705	0.597875	0.403241	pretrained
RAATSPAPGPSDATAR	2	38346	Acetyl:2H(3)@Any N-term	0	16	15898	15913	27	QE	0.970892	0.973894	0.854214	0.569936	pretrained
RCHQGPIKPYQQGR	3	38354	Acetyl:2H(3)@Any N-term;Carbamidomethyl@C;Acetyl:2H(3)@K	0;2;8	14	15913	15926	27	QE	0.973052	0.971748	0.848314	0.981559	pretrained
RLREQEKEEKER	3	38363	Acetyl:2H(3)@Any N-term;Acetyl:2H(3)@K;Acetyl:2H(3)@K	0;7;10	12	15926	15937	27	QE	0.80891	0.828792	0.621943	0.355391	pretrained
RRNKSTESLQANVQR	3	38371	Acetyl:2H(3)@Any N-term;Acetyl:2H(3)@K	0;4	15	15937	15951	27	QE	0.578474	0.636893	0.439561	0.00960356	pretrained
RKGGCDSKMAAR	2	38380	Acetyl:2H(3)@Any N-term;Acetyl:2H(3)@K;Carbamidomethyl@C;Acetyl:2H(3)@K	0;2;5;8	12	15951	15962	27	QE	0.876759	0.89253	0.702143	0.819309	pretrained
RAQAEQAALR	2	38408	Acetyl:2H(3)@Any N-term	0	10	15962	15971	27	QE	0.959649	0.96893	0.84089	0.794723	pretrained
RMEELHNQEMQKR	3	38411	Acetyl:2H(3)@Any N-term;Oxidation@M;Acetyl:2H(3)@K	0;10;12	13	15971	15983	27	QE	0.916191	0.931394	0.762813	0.878474	pretrained
RVLATEDR	2	38427	Acetyl:2H(3)@Any N-term	0	8	15983	15990	27	QE	0.940612	0.949676	0.797176	0.654899	pretrained
RGKSGFNSKSGQR	2	38456	Acetyl:2H(3)@Any N-term;Acetyl:2H(3)@K;Acetyl:2H(3)@K	0;3;9	13	15990	16002	27	QE	0.834196	0.860531	0.659737	0.649967	pretrained
RGKSGFNSKSGQR	3	38457	Acetyl:2H(3)@Any N-term;Acetyl:2H(3)@K;Acetyl:2H(3)@K	0;3;9	13	16002	16014	27	QE	0.9412	0.948676	0.795153	0.450934	pretrained
RKQQLAEEEARRPR	4	38503	Acetyl:2H(3)@Any N-term;Acetyl:2H(3)@K	0;2	14	16014	16027	27	QE	0.899575	0.91377	0.733685	0.685905	pretrained
RRTEEGPTLSYGR	3	38562	Acetyl:2H(3)@Any N-term	0	13	16027	16039	27	QE	0.791325	0.837044	0.631436	0.376628	pretrained
RQQQQQLDQKSAATR	3	38609	Acetyl:2H(3)@Any N-term;Acetyl:2H(3)@K	0;10	15	16039	16053	27	QE	0.937763	0.953341	0.804762	0.685304	pretrained
RMFGGPGTASRPSSSR	3	38610	Acetyl:2H(3)@Any N-term	0	16	16053	16068	27	QE	0.607059	0.663881	0.462184	0.0412893	pretrained
RKHKKGQSEEIQKKR	3	38629	Acetyl:2H(3)@Any N-term;Acetyl:2H(3)@K;Acetyl:2H(3)@K;Acetyl:2H(3)@K;Acetyl:2H(3)@K;Acetyl:2H(3)@K	0;2;4;5;13;14	15	16068	16082	27	QE	0.763972	0.810551	0.601665	0.393575	pretrained
RDHFEEAMR	3	38636	Acetyl:2H(3)@Any N-term	0	9	16082	16090	27	QE	0.975777	0.980524	0.874151	0.930535	pretrained
RDHFEEAMR	2	38648	Acetyl:2H(3)@Any N-term	0	9	16090	16098	27	QE	0.922496	0.947083	0.791971	0.734787	pretrained
RDHFEEAMR	3	38650	Acetyl:2H(3)@Any N-term;Oxidation@M	0;8	9	16098	16106	27	QE	0.977743	0.980932	0.87548	0.720491	pretrained
RKMADLHAVPR	3	38690	Acetyl:2H(3)@Any N-term;Acetyl:2H(3)@K;Oxidation@M	0;2;3	11	16106	16116	27	QE	0.968823	0.973612	0.853427	0.669606	pretrained
RTAQEVETYR	2	38698	Acetyl:2H(3)@Any N-term	0	10	16116	16125	27	QE	0.954608	0.965942	0.833373	0.942085	pretrained
RTSINVVR	2	38730	Acetyl:2H(3)@Any N-term	0	8	16125	16132	27	QE	0.953562	0.961661	0.823146	0.703339	pretrained
RPAYRDNQWNPR	3	38731	Acetyl:2H(3)@Any N-term	0	12	16132	16143	27	QE	0.931552	0.941666	0.78148	0.526216	pretrained
RGLDEDRGSWR	3	38739	Acetyl:2H(3)@Any N-term	0	11	16143	16153	27	QE	0.634038	0.71488	0.507038	0.588931	pretrained
RVEELCQR	2	38753	Acetyl:2H(3)@Any N-term;Carbamidomethyl@C	0;6	8	16153	16160	27	QE	0.829608	0.875351	0.67874	0.669677	pretrained
RMEELHNQEVQKR	3	38833	Acetyl:2H(3)@Any N-term;Oxidation@M;Acetyl:2H(3)@K	0;2;12	13	16160	16172	27	QE	0.810065	0.854256	0.651974	0.789622	pretrained
RMEELHNQEVQKR	3	38835	Acetyl:2H(3)@Any N-term;Acetyl:2H(3)@K	0;12	13	16172	16184	27	QE	0.888672	0.912919	0.732354	0.638352	pretrained
RMEELHNQEVQKR	2	38837	Acetyl:2H(3)@Any N-term;Acetyl:2H(3)@K	0;12	13	16184	16196	27	QE	0.869978	0.894586	0.705059	0.440947	pretrained
RGEELIGR	2	38885	Acetyl:2H(3)@Any N-term	0	8	16196	16203	27	QE	0.941653	0.954257	0.806702	0.780788	pretrained
RGEKEECFER	2	38893	Acetyl:2H(3)@Any N-term;Acetyl:2H(3)@K;Carbamidomethyl@C	0;4;7	10	16203	16212	27	QE	0.986413	0.987606	0.899664	0.898327	pretrained
RGLAPNTPGKAR	2	38920	Acetyl:2H(3)@Any N-term;Acetyl:2H(3)@K	0;10	12	16212	16223	27	QE	0.915252	0.9286	0.757973	0.511135	pretrained
RYFGGTEDR	2	38922	Acetyl:2H(3)@Any N-term	0	9	16223	16231	27	QE	0.940901	0.951926	0.801799	0.667705	pretrained
RRDPEEPEKTELSER	3	38935	Acetyl:2H(3)@Any N-term;Acetyl:2H(3)@K	0;9	15	16231	16245	27	QE	0.583967	0.659236	0.45824	0.176042	pretrained
RAKQLSSVQEDR	2	38951	Acetyl:2H(3)@Any N-term;Acetyl:2H(3)@K	0;3	12	16245	16256	27	QE	0.935702	0.941378	0.780936	0.570049	pretrained
RMEELHNQEMQKR	3	38961	Acetyl:2H(3)@Any N-term;Acetyl:2H(3)@K	0;12	13	16256	16268	27	QE	0.896638	0.918491	0.741182	0.675206	pretrained
RKPSLGKR	2	38966	Acetyl:2H(3)@Any N-term;Acetyl:2H(3)@K;Acetyl:2H(3)@K	0;2;7	8	16268	16275	27	QE	0.771191	0.809289	0.600294	0.838259	pretrained
RMEELHNQEMQKR	2	38967	Acetyl:2H(3)@Any N-term;Acetyl:2H(3)@K	0;12	13	16275	16287	27	QE	0.928532	0.939079	0.776638	0.639221	pretrained
RMEELHNQEMQKR	3	38968	Acetyl:2H(3)@Any N-term;Oxidation@M;Acetyl:2H(3)@K	0;2;12	13	16287	16299	27	QE	0.694606	0.759845	0.54945	0.537885	pretrained
RACAAGTPAVIR	2	38969	Acetyl:2H(3)@Any N-term;Carbamidomethyl@C	0;3	12	16299	16310	27	QE	0.951823	0.959872	0.81904	0.860677	pretrained
RQEQTLRDATMEVQR	3	38983	Acetyl:2H(3)@Any N-term	0	15	16310	16324	27	QE	0.475305	0.548451	0.369565	0.729152	pretrained
RLSYNTASNKTR	2	38986	Acetyl:2H(3)@Any N-term;Acetyl:2H(3)@K	0;10	12	16324	16335	27	QE	0.89073	0.905867	0.721559	0.387456	pretrained
RLSYNTASNKTR	3	38991	Acetyl:2H(3)@Any N-term;Acetyl:2H(3)@K	0;10	12	16335	16346	27	QE	0.988228	0.989963	0.909727	0.936293	pretrained
RLNQQPSQGLGPR	2	38993	Acetyl:2H(3)@Any N-term	0	13	16346	16358	27	QE	0.906568	0.915517	0.736436	0.362951	pretrained
REISELR	2	39041	Acetyl:2H(3)@Any N-term	0	7	16358	16364	27	QE	0.972279	0.97806	0.866398	0.775652	pretrained
RQVDQLTNDKAR	2	39130	Acetyl:2H(3)@Any N-term;Acetyl:2H(3)@K	0;10	12	16364	16375	27	QE	0.765027	0.800059	0.590397	0.228471	pretrained
RGGGIDPTVKER	2	39136	Acetyl:2H(3)@Any N-term;Acetyl:2H(3)@K	0;10	12	16375	16386	27	QE	0.982892	0.983135	0.882915	0.482311	pretrained
RQSMKEKEHQVVR	3	39143	Acetyl:2H(3)@Any N-term;Acetyl:2H(3)@K;Acetyl:2H(3)@K	0;5;7	13	16386	16398	27	QE	0.875725	0.898694	0.710966	0.328539	pretrained
RPASGDDLSAKKSR	2	39155	Acetyl:2H(3)@Any N-term;Acetyl:2H(3)@K;Acetyl:2H(3)@K	0;11;12	14	16398	16411	27	QE	0.730567	0.768777	0.558269	0.17583	pretrained
RLQELER	2	39182	Acetyl:2H(3)@Any N-term	0	7	16411	16417	27	QE	0.96446	0.968677	0.84024	0.778261	pretrained
RQKKTLKKTR	2	39188	Acetyl:2H(3)@Any N-term;Acetyl:2H(3)@K;Acetyl:2H(3)@K;Acetyl:2H(3)@K;Acetyl:2H(3)@K	0;3;4;7;8	10	16417	16426	27	QE	0.884022	0.898123	0.710138	0.507465	pretrained
RQKKTLKKTR	3	39194	Acetyl:2H(3)@Any N-term;Acetyl:2H(3)@K;Acetyl:2H(3)@K;Acetyl:2H(3)@K;Acetyl:2H(3)@K	0;3;4;7;8	10	16426	16435	27	QE	0.950381	0.959413	0.818001	0.756499	pretrained
RAQEEAKEAEMSR	2	39198	Acetyl:2H(3)@Any N-term;Acetyl:2H(3)@K	0;7	13	16435	16447	27	QE	0.894037	0.919343	0.742558	0.635475	pretrained
RQVDQLTNDKAR	2	39207	Acetyl:2H(3)@Any N-term;Acetyl:2H(3)@K	0;10	12	16447	16458	27	QE	0.893396	0.911789	0.730598	0.750317	pretrained
RINKAKNEQEHHAGGDSQKDIMQR	4	39210	Acetyl:2H(3)@Any N-term;Acetyl:2H(3)@K;Acetyl:2H(3)@K;Acetyl:2H(3)@K	0;4;6;19	24	16458	16481	27	QE	0.566724	0.600713	0.410233	0.114891	pretrained
RQVDQLTNDKAR	3	39211	Acetyl:2H(3)@Any N-term;Acetyl:2H(3)@K	0;10	12	16481	16492	27	QE	0.92102	0.936896	0.772629	0.655814	pretrained
RTKTEISEMNR	2	39222	Acetyl:2H(3)@Any N-term;Acetyl:2H(3)@K	0;3	11	16492	16502	27	QE	0.864427	0.8841	0.690455	0.382739	pretrained
RQILETMQNDR	2	39224	Acetyl:2H(3)@Any N-term;Oxidation@M	0;7	11	16502	16512	27	QE	0.983071	0.984029	0.886069	0.64484	pretrained
RPGSAATTKPIVR	2	39228	Acetyl:2H(3)@Any N-term;Acetyl:2H(3)@K	0;9	13	16512	16524	27	QE	0.794763	0.821085	0.613262	0.251574	pretrained
RQKLEDSYR	2	39234	Acetyl:2H(3)@Any N-term;Acetyl:2H(3)@K	0;3	9	16524	16532	27	QE	0.89494	0.913522	0.733297	0.965909	pretrained
RPGSAATTKPIVR	3	39236	Acetyl:2H(3)@Any N-term;Acetyl:2H(3)@K	0;9	13	16532	16544	27	QE	0.981157	0.982492	0.880699	0.763189	pretrained
RQVDQLTNDKAR	2	39252	Acetyl:2H(3)@Any N-term;Acetyl:2H(3)@K	0;10	12	16544	16555	27	QE	0.968887	0.974463	0.85582	0.540803	pretrained
RQVDQLTNDKAR	3	39254	Acetyl:2H(3)@Any N-term;Acetyl:2H(3)@K	0;10	12	16555	16566	27	QE	0.98086	0.984593	0.888104	0.842283	pretrained
RGPPEKEWR	2	39276	Acetyl:2H(3)@Any N-term;Acetyl:2H(3)@K	0;6	9	16566	16574	27	QE	0.863707	0.892256	0.701756	0.795821	pretrained
RAPGPATASAAAAMR	2	39284	Acetyl:2H(3)@Any N-term	0	15	16574	16588	27	QE	0.890791	0.897784	0.709648	0.365208	pretrained
RQVDQLTNDKAR	2	39286	Acetyl:2H(3)@Any N-term;Acetyl:2H(3)@K	0;10	12	16588	16599	27	QE	0.981849	0.985085	0.88991	0.672939	pretrained
RQVDQLTNDKAR	3	39289	Acetyl:2H(3)@Any N-term;Acetyl:2H(3)@K	0;10	12	16599	16610	27	QE	0.974595	0.979425	0.870636	0.742354	pretrained
REKAEGDVAALNRR	3	39326	Acetyl:2H(3)@Any N-term;Acetyl:2H(3)@K	0;3	14	16610	16623	27	QE	0.957173	0.961548	0.822884	0.526338	pretrained
REKAEGDVAALNRR	2	39342	Acetyl:2H(3)@Any N-term;Acetyl:2H(3)@K	0;3	14	16623	16636	27	QE	0.889053	0.898131	0.71015	0.665799	pretrained
RQVDQLTNDKAR	2	39349	Acetyl:2H(3)@Any N-term;Acetyl:2H(3)@K	0;10	12	16636	16647	27	QE	0.930313	0.942785	0.783607	0.473643	pretrained
REKAEGDVAALNRR	3	39371	Acetyl:2H(3)@Any N-term;Acetyl:2H(3)@K	0;3	14	16647	16660	27	QE	0.244743	0.316485	0.205005	0.415948	pretrained
RFTLDR	2	39375	Acetyl:2H(3)@Any N-term	0	6	16660	16665	27	QE	0.979582	0.983533	0.884308	0.728571	pretrained
RKMADLHAVPR	3	39435	Acetyl:2H(3)@Any N-term;Acetyl:2H(3)@K	0;2	11	16665	16675	27	QE	0.919124	0.932408	0.764592	0.789681	pretrained
RSASQAGSKSQAVEKPPSEKPR	3	39493	Acetyl:2H(3)@Any N-term;Acetyl:2H(3)@K;Acetyl:2H(3)@K;Acetyl:2H(3)@K	0;9;15;20	22	16675	16696	27	QE	0.978429	0.979024	0.869378	0.747545	pretrained
RDEEKKETKETKSKER	3	39533	Acetyl:2H(3)@Any N-term;Acetyl:2H(3)@K;Acetyl:2H(3)@K;Acetyl:2H(3)@K;Acetyl:2H(3)@K;Acetyl:2H(3)@K	0;5;6;9;12;14	16	16696	16711	27	QE	0.970977	0.975917	0.860001	0.587608	pretrained
RLDIVR	2	39546	Acetyl:2H(3)@Any N-term	0	6	16711	16716	27	QE	0.962125	0.972316	0.849854	0.888722	pretrained
RPLPKDQQK	2	39596	Acetyl:2H(3)@Any N-term;Acetyl:2H(3)@K;Acetyl:2H(3)@K	0;5;9	9	16716	16724	27	QE	0.682067	0.752521	0.542325	0.54912	pretrained
RQVEQTKEHALSKER	3	39797	Acetyl:2H(3)@Any N-term;Acetyl:2H(3)@K;Acetyl:2H(3)@K	0;7;13	15	16724	16738	27	QE	0.935877	0.94751	0.792818	0.642891	pretrained
RSDDNEKALKIR	2	39808	Acetyl:2H(3)@Any N-term;Acetyl:2H(3)@K;Acetyl:2H(3)@K	0;7;10	12	16738	16749	27	QE	0.948302	0.95837	0.815661	0.843552	pretrained
RSDDNEKALKIR	3	39809	Acetyl:2H(3)@Any N-term;Acetyl:2H(3)@K;Acetyl:2H(3)@K	0;7;10	12	16749	16760	27	QE	0.953704	0.961299	0.822307	0.782805	pretrained
RRPYNDDADIDYINER	3	39838	Acetyl:2H(3)@Any N-term	0	16	16760	16775	27	QE	0.956673	0.964994	0.831056	0.693748	pretrained
RRDLAQALINR	3	39848	Acetyl:2H(3)@Any N-term	0	11	16775	16785	27	QE	0.896809	0.919512	0.742832	0.442026	pretrained
RISAISVAER	2	39850	Acetyl:2H(3)@Any N-term	0	10	16785	16794	27	QE	0.972563	0.973941	0.854347	0.538481	pretrained
RSDDNEKALKIR	2	39863	Acetyl:2H(3)@Any N-term;Acetyl:2H(3)@K;Acetyl:2H(3)@K	0;7;10	12	16794	16805	27	QE	0.919015	0.936623	0.772132	0.619239	pretrained
RPQYSNPPVQGEVMEGADNQGAGEQGRPVR	3	39873	Acetyl:2H(3)@Any N-term	0	30	16805	16834	27	QE	0.845116	0.852424	0.649736	0.630342	pretrained
RPQYSNPPVQGEVMEGADNQGAGEQGRPVR	4	39875	Acetyl:2H(3)@Any N-term	0	30	16834	16863	27	QE	0.910643	0.917321	0.739305	0.643955	pretrained
RKQEELQQLEQQRR	3	39893	Acetyl:2H(3)@Any N-term;Acetyl:2H(3)@K	0;2	14	16863	16876	27	QE	0.905245	0.922077	0.747019	0.715402	pretrained
RSEKIWPR	2	39948	Acetyl:2H(3)@Any N-term;Acetyl:2H(3)@K	0;4	8	16876	16883	27	QE	0.898067	0.929121	0.758869	0.819923	pretrained
RSDDNEKALKIR	2	39951	Acetyl:2H(3)@Any N-term;Acetyl:2H(3)@K;Acetyl:2H(3)@K	0;7;10	12	16883	16894	27	QE	0.891224	0.906548	0.722585	0.743411	pretrained
RSDDNEKALKIR	3	39968	Acetyl:2H(3)@Any N-term;Acetyl:2H(3)@K;Acetyl:2H(3)@K	0;7;10	12	16894	16905	27	QE	0.939549	0.949504	0.796827	0.724736	pretrained
RAIADMLR	2	39969	Acetyl:2H(3)@Any N-term	0	8	16905	16912	27	QE	0.937785	0.951201	0.800298	0.756705	pretrained
RKMRPFEGFQR	3	40007	Acetyl:2H(3)@Any N-term;Acetyl:2H(3)@K	0;2	11	16912	16922	27	QE	0.881676	0.899779	0.712545	0.69925	pretrained
RFSAGQWEAR	2	40011	Acetyl:2H(3)@Any N-term	0	10	16922	16931	27	QE	0.88314	0.904216	0.719088	0.744402	pretrained
RSDDNEKALKIR	2	40056	Acetyl:2H(3)@Any N-term;Acetyl:2H(3)@K;Acetyl:2H(3)@K	0;7;10	12	16931	16942	27	QE	0.658402	0.729137	0.520157	0.634179	pretrained
RVLEESELAR	2	40063	Acetyl:2H(3)@Any N-term	0	10	16942	16951	27	QE	0.914797	0.924297	0.750695	0.808494	pretrained
RPIVACELGR	2	40069	Acetyl:2H(3)@Any N-term;Carbamidomethyl@C	0;6	10	16951	16960	27	QE	0.913255	0.924081	0.750335	0.330888	pretrained
RGGDGQINEQVEKLR	3	40080	Acetyl:2H(3)@Any N-term;Acetyl:2H(3)@K	0;13	15	16960	16974	27	QE	0.952413	0.960479	0.820423	0.846685	pretrained
RKDLVKTMR	2	40122	Acetyl:2H(3)@Any N-term;Acetyl:2H(3)@K;Acetyl:2H(3)@K	0;2;6	9	16974	16982	27	QE	0.868952	0.897376	0.709059	0.795638	pretrained
RETVEREKEQMMR	3	40205	Acetyl:2H(3)@Any N-term;Acetyl:2H(3)@K	0;8	13	16982	16994	27	QE	0.74884	0.796292	0.586417	0.390577	pretrained
RSPPADAIPKSKKVKVSHR	3	40221	Acetyl:2H(3)@Any N-term;Acetyl:2H(3)@K;Acetyl:2H(3)@K;Acetyl:2H(3)@K;Acetyl:2H(3)@K	0;10;12;13;15	19	16994	17012	27	QE	0.888055	0.89497	0.705606	0.436604	pretrained
RGYFDEEMNR	2	40227	Acetyl:2H(3)@Any N-term	0	10	17012	17021	27	QE	0.926799	0.945379	0.788617	0.791763	pretrained
RSPPADAIPKSKKVKVSHR	4	40240	Acetyl:2H(3)@Any N-term;Acetyl:2H(3)@K;Acetyl:2H(3)@K;Acetyl:2H(3)@K;Acetyl:2H(3)@K	0;10;12;13;15	19	17021	17039	27	QE	0.937167	0.939752	0.777888	0.635025	pretrained
RKGKEDEGEEAASPMLQIQR	3	40244	Acetyl:2H(3)@Any N-term;Acetyl:2H(3)@K;Acetyl:2H(3)@K;Oxidation@M	0;2;4;15	20	17039	17058	27	QE	0.690863	0.737705	0.52818	0.636227	pretrained
RLKEQSIFGDHR	3	40257	Acetyl:2H(3)@Any N-term;Acetyl:2H(3)@K	0;3	12	17058	17069	27	QE	0.959639	0.964437	0.829709	0.70303	pretrained
RVTAYTVDVTGR	2	40271	Acetyl:2H(3)@Any N-term	0	12	17069	17080	27	QE	0.96453	0.966721	0.8353	0.798309	pretrained
RKVASMAPVTAEGFQER	3	40281	Acetyl:2H(3)@Any N-term;Acetyl:2H(3)@K;Oxidation@M	0;2;6	17	17080	17096	27	QE	0.721554	0.757545	0.547203	0.541323	pretrained
RRDELSEEINNLR	3	40312	Acetyl:2H(3)@Any N-term	0	13	17096	17108	27	QE	0.871264	0.905411	0.720875	0.642423	pretrained
RRDELSEEINNLR	2	40323	Acetyl:2H(3)@Any N-term	0	13	17108	17120	27	QE	0.847265	0.873649	0.676506	0.306882	pretrained
RELPPDQAEYCIAR	2	40346	Acetyl:2H(3)@Any N-term;Carbamidomethyl@C	0;11	14	17120	17133	27	QE	0.917781	0.931462	0.762932	0.609878	pretrained
RAKLAKEKAEKER	3	40376	Acetyl:2H(3)@Any N-term;Acetyl:2H(3)@K;Acetyl:2H(3)@K;Acetyl:2H(3)@K;Acetyl:2H(3)@K	0;3;6;8;11	13	17133	17145	27	QE	0.922551	0.936967	0.772758	0.70267	pretrained
RQLDKSKLKPGTR	3	40377	Acetyl:2H(3)@Any N-term;Acetyl:2H(3)@K;Acetyl:2H(3)@K;Acetyl:2H(3)@K	0;5;7;9	13	17145	17157	27	QE	0.982671	0.982755	0.881598	0.762972	pretrained
RGGAGAGGGWKLAEEESCREDVTR	3	40383	Acetyl:2H(3)@Any N-term;Acetyl:2H(3)@K;Carbamidomethyl@C	0;11;18	24	17157	17180	27	QE	0.714946	0.730838	0.521741	0.349098	pretrained
RQLDKSKLKPGTR	2	40401	Acetyl:2H(3)@Any N-term;Acetyl:2H(3)@K;Acetyl:2H(3)@K;Acetyl:2H(3)@K	0;5;7;9	13	17180	17192	27	QE	0.891013	0.90258	0.716659	0.45609	pretrained
RLPTVMVR	2	40434	Acetyl:2H(3)@Any N-term	0	8	17192	17199	27	QE	0.953597	0.964912	0.830858	0.795566	pretrained
RPEEKEPEKVNPQISDEKDEDEKEEKRR	4	40492	Acetyl:2H(3)@Any N-term;Acetyl:2H(3)@K;Acetyl:2H(3)@K;Acetyl:2H(3)@K;Acetyl:2H(3)@K;Acetyl:2H(3)@K	0;5;9;18;23;26	28	17199	17226	27	QE	0.923013	0.927705	0.756443	0.354826	pretrained
RYIGIVKQAGLER	3	40514	Acetyl:2H(3)@Any N-term;Acetyl:2H(3)@K	0;7	13	17226	17238	27	QE	0.9297	0.941464	0.781099	0.510801	pretrained
RVAAALPGMESTQDR	2	40519	Acetyl:2H(3)@Any N-term	0	15	17238	17252	27	QE	0.976919	0.978964	0.869189	0.406357	pretrained
RLKKCVDKIR	2	40601	Acetyl:2H(3)@Any N-term;Acetyl:2H(3)@K;Acetyl:2H(3)@K;Carbamidomethyl@C;Acetyl:2H(3)@K	0;3;4;5;8	10	17252	17261	27	QE	0.903968	0.911562	0.730246	0.477735	pretrained
RVYEILR	2	40632	Acetyl:2H(3)@Any N-term	0	7	17261	17267	27	QE	0.97634	0.981845	0.878508	0.705217	pretrained
RDSIVAELDR	2	40787	Acetyl:2H(3)@Any N-term	0	10	17267	17276	27	QE	0.984329	0.98681	0.896485	0.836036	pretrained
RAKFKFPGR	2	40803	Acetyl:2H(3)@Any N-term;Acetyl:2H(3)@K;Acetyl:2H(3)@K	0;3;5	9	17276	17284	27	QE	0.897728	0.921384	0.74588	0.697581	pretrained
RKEEDQATLVEQVKR	2	40816	Acetyl:2H(3)@Any N-term;Acetyl:2H(3)@K;Acetyl:2H(3)@K	0;2;14	15	17284	17298	27	QE	0.950717	0.95547	0.809301	0.5081	pretrained
RKEEDQATLVEQVKR	3	40826	Acetyl:2H(3)@Any N-term;Acetyl:2H(3)@K;Acetyl:2H(3)@K	0;2;14	15	17298	17312	27	QE	0.951619	0.954841	0.807949	0.688346	pretrained
RPFFPFHSPSR	3	40852	Acetyl:2H(3)@Any N-term	0	11	17312	17322	27	QE	0.690952	0.749598	0.539506	0.55319	pretrained
RYQKSTELLIR	2	40949	Acetyl:2H(3)@Any N-term;Acetyl:2H(3)@K	0;4	11	17322	17332	27	QE	0.970208	0.972837	0.851279	0.72242	pretrained
RTTYLVLDEADR	2	41045	Acetyl:2H(3)@Any N-term	0	12	17332	17343	27	QE	0.964508	0.970465	0.844891	0.758703	pretrained
RQILETMQNDR	2	41049	Acetyl:2H(3)@Any N-term	0	11	17343	17353	27	QE	0.975242	0.975892	0.859928	0.730863	pretrained
RKGKEDEGEEAASPMLQIQR	3	41054	Acetyl:2H(3)@Any N-term;Acetyl:2H(3)@K;Acetyl:2H(3)@K	0;2;4	20	17353	17372	27	QE	0.873698	0.883386	0.689484	0.523144	pretrained
RKGKEDEGEEAASPMLQIQR	2	41063	Acetyl:2H(3)@Any N-term;Acetyl:2H(3)@K;Acetyl:2H(3)@K	0;2;4	20	17372	17391	27	QE	0.896006	0.907764	0.724424	0.491757	pretrained
RLEAGAMVLADR	2	41201	Acetyl:2H(3)@Any N-term	0	12	17391	17402	27	QE	0.982945	0.985077	0.88988	0.611135	pretrained
RLEAALVKRPNPDILDHER	4	41222	Acetyl:2H(3)@Any N-term;Acetyl:2H(3)@K	0;8	19	17402	17420	27	QE	0.829123	0.855771	0.653833	0.812416	pretrained
REATLELLGR	2	41276	Acetyl:2H(3)@Any N-term	0	10	17420	17429	27	QE	0.799714	0.832182	0.625818	0.78314	pretrained
RKDLPNGDIDEYEKKSKR	3	41286	Acetyl:2H(3)@Any N-term;Acetyl:2H(3)@K;Acetyl:2H(3)@K;Acetyl:2H(3)@K;Acetyl:2H(3)@K	0;2;14;15;17	18	17429	17446	27	QE	0.976537	0.98052	0.874138	0.596309	pretrained
RKVASMAPVTAEGFQER	3	41313	Acetyl:2H(3)@Any N-term;Acetyl:2H(3)@K	0;2	17	17446	17462	27	QE	0.957543	0.963184	0.826717	0.652381	pretrained
RVLDELTLAR	2	41336	Acetyl:2H(3)@Any N-term	0	10	17462	17471	27	QE	0.951639	0.961973	0.823874	0.829344	pretrained
RAEDGSVIDYELIDQDAR	3	41347	Acetyl:2H(3)@Any N-term	0	18	17471	17488	27	QE	0.982706	0.985861	0.892818	0.569245	pretrained
RVTDFFAR	2	41356	Acetyl:2H(3)@Any N-term	0	8	17488	17495	27	QE	0.965814	0.973169	0.852194	0.839901	pretrained
RLEAAYLDLQR	2	41373	Acetyl:2H(3)@Any N-term	0	11	17495	17505	27	QE	0.888389	0.902732	0.716883	0.599906	pretrained
RLRLPLEAALR	3	41409	Acetyl:2H(3)@Any N-term	0	11	17505	17515	27	QE	0.918629	0.934236	0.767835	0.814071	pretrained
RIQLVEEELDR	2	41527	Acetyl:2H(3)@Any N-term	0	11	17515	17525	27	QE	0.902924	0.920894	0.745079	0.546717	pretrained
RSQQQQVPVVDFQAELR	2	41774	Acetyl:2H(3)@Any N-term	0	17	17525	17541	27	QE	0.907538	0.917053	0.738877	0.251625	pretrained
RAEDGSVIDYELIDQDAR	3	41816	Acetyl:2H(3)@Any N-term	0	18	17541	17558	27	QE	0.68452	0.726659	0.517856	0.136485	pretrained
RLFEGNALLR	2	41821	Acetyl:2H(3)@Any N-term	0	10	17558	17567	27	QE	0.957212	0.966663	0.835157	0.626126	pretrained
RAEDGSVIDYELIDQDAR	2	41883	Acetyl:2H(3)@Any N-term	0	18	17567	17584	27	QE	0.837738	0.859168	0.658037	0.762454	pretrained
RKGGLDYLKQVENETR	3	41886	Acetyl:2H(3)@Any N-term;Acetyl:2H(3)@K;Acetyl:2H(3)@K	0;2;9	16	17584	17599	27	QE	0.932971	0.943259	0.784515	0.556432	pretrained
RAEDGSVIDYELIDQDAR	3	41889	Acetyl:2H(3)@Any N-term	0	18	17599	17616	27	QE	0.709583	0.748842	0.538779	0.246708	pretrained
RVPFSLLR	2	41912	Acetyl:2H(3)@Any N-term	0	8	17616	17623	27	QE	0.938318	0.952317	0.802612	0.885057	pretrained
RAEDGSVIDYELIDQDAR	3	41936	Acetyl:2H(3)@Any N-term	0	18	17623	17640	27	QE	0.652217	0.698114	0.491954	0.346376	pretrained
RAEDGSVIDYELIDQDAR	2	41950	Acetyl:2H(3)@Any N-term	0	18	17640	17657	27	QE	0.660689	0.690597	0.485304	0.368878	pretrained
RVPFSLLR	2	41964	Acetyl:2H(3)@Any N-term	0	8	17657	17664	27	QE	0.916728	0.936558	0.772015	0.817734	pretrained
RAEDGSVIDYELIDQDAR	3	41989	Acetyl:2H(3)@Any N-term	0	18	17664	17681	27	QE	0.981269	0.984722	0.888576	0.911765	pretrained
RAEDGSVIDYELIDQDAR	2	42007	Acetyl:2H(3)@Any N-term	0	18	17681	17698	27	QE	0.99242	0.993521	0.927494	0.732889	pretrained
RAEDGSVIDYELIDQDAR	3	42036	Acetyl:2H(3)@Any N-term	0	18	17698	17715	27	QE	0.807208	0.837555	0.632032	0.657079	pretrained
RVPFSLLR	2	42043	Acetyl:2H(3)@Any N-term	0	8	17715	17722	27	QE	0.901858	0.920514	0.74446	0.821839	pretrained
RFELYFQGPSSNKPR	3	42073	Acetyl:2H(3)@Any N-term;Acetyl:2H(3)@K	0;13	15	17722	17736	27	QE	0.949128	0.957742	0.814266	0.74296	pretrained
RAEDGSVIDYELIDQDAR	2	42115	Acetyl:2H(3)@Any N-term	0	18	17736	17753	27	QE	0.947897	0.954099	0.806366	0.761137	pretrained
RAEDGSVIDYELIDQDAR	3	42123	Acetyl:2H(3)@Any N-term	0	18	17753	17770	27	QE	0.941048	0.952053	0.802064	0.876742	pretrained
RDDGTGQLLLPLSDAR	2	42198	Acetyl:2H(3)@Any N-term	0	16	17770	17785	27	QE	0.989007	0.990181	0.910714	0.861184	pretrained
RKWDKDEYEKLAEKR	3	42246	Acetyl:2H(3)@Any N-term;Acetyl:2H(3)@K;Acetyl:2H(3)@K;Acetyl:2H(3)@K;Acetyl:2H(3)@K	0;2;5;10;14	15	17785	17799	27	QE	0.926009	0.935129	0.769434	0.609945	pretrained
RNENACKGAPKTCTLLEKFPETTGCR	3	42402	Acetyl:2H(3)@Any N-term;Carbamidomethyl@C;Acetyl:2H(3)@K;Acetyl:2H(3)@K;Carbamidomethyl@C;Acetyl:2H(3)@K;Carbamidomethyl@C	0;6;7;11;13;18;25	26	17799	17824	27	QE	0.941159	0.94561	0.789067	0.0726852	pretrained
RAAGVVLEMIR	2	42403	Acetyl:2H(3)@Any N-term	0	11	17824	17834	27	QE	0.785175	0.832138	0.625767	0.662477	pretrained
RYNFPVEVEVPMER	2	42494	Acetyl:2H(3)@Any N-term	0	14	17834	17847	27	QE	0.952979	0.961958	0.823837	0.837659	pretrained
RESATADAGYAILEKKGALAER	3	42516	Acetyl:2H(3)@Any N-term;Acetyl:2H(3)@K;Acetyl:2H(3)@K	0;15;16	22	17847	17868	27	QE	0.817702	0.849961	0.646749	0.47482	pretrained
RKYSEIMAEKAANAAGKKFR	3	42588	Acetyl:2H(3)@Any N-term;Acetyl:2H(3)@K;Acetyl:2H(3)@K;Acetyl:2H(3)@K;Acetyl:2H(3)@K	0;2;10;17;18	20	17868	17887	27	QE	0.868211	0.889762	0.69826	0.52797	pretrained
RAAIAQALAGEVSVVPPSR	3	42650	Acetyl:2H(3)@Any N-term	0	19	17887	17905	27	QE	0.871426	0.895466	0.706314	0.531899	pretrained
RDGADGFVQLDPLCASPGAAVGASR	3	42683	Acetyl:2H(3)@Any N-term;Carbamidomethyl@C	0;14	25	17905	17929	27	QE	0.973765	0.977174	0.863717	0.660255	pretrained
RFDEILEASDGIMVAR	3	42706	Acetyl:2H(3)@Any N-term;Oxidation@M	0;13	16	17929	17944	27	QE	0.981904	0.984957	0.889438	0.629647	pretrained
RFDEILEASDGIMVAR	2	42711	Acetyl:2H(3)@Any N-term;Oxidation@M	0;13	16	17944	17959	27	QE	0.923631	0.933751	0.76697	0.70803	pretrained
RPVQAWVESLRGFEQER	3	42787	Acetyl:2H(3)@Any N-term	0	17	17959	17975	27	QE	0.901456	0.916416	0.737863	0.606525	pretrained
RPVQAWVESLRGFEQER	3	42788	Acetyl:2H(3)@Any N-term	0	17	17975	17991	27	QE	0.932892	0.941876	0.781878	0.542994	pretrained
RKGGEADNLDEFLKEFENPEVPREDQQQQHQQR	5	42813	Acetyl:2H(3)@Any N-term;Acetyl:2H(3)@K;Acetyl:2H(3)@K	0;2;14	33	17991	18023	27	QE	0.864635	0.880537	0.685636	0.592517	pretrained
RITQETFDAVLQEKAKR	3	42839	Acetyl:2H(3)@Any N-term;Acetyl:2H(3)@K;Acetyl:2H(3)@K	0;14;16	17	18023	18039	27	QE	0.979036	0.982517	0.880784	0.641186	pretrained
RAEEKIKSVGGACVLVA	2	42883	Acetyl:2H(3)@Any N-term;Acetyl:2H(3)@K;Acetyl:2H(3)@K;Carbamidomethyl@C	0;5;7;13	17	18039	18055	27	QE	0.772961	0.814968	0.606491	0.237843	pretrained
RAEEKIKSVGGACVLVA	3	42884	Acetyl:2H(3)@Any N-term;Acetyl:2H(3)@K;Acetyl:2H(3)@K;Carbamidomethyl@C	0;5;7;13	17	18055	18071	27	QE	0.393611	0.484064	0.321679	0.206708	pretrained
RFDEILEASDGIMVAR	3	42899	Acetyl:2H(3)@Any N-term;Oxidation@M	0;13	16	18071	18086	27	QE	0.982332	0.985336	0.890843	0.785802	pretrained
RFDEILEASDGIMVAR	2	42900	Acetyl:2H(3)@Any N-term;Oxidation@M	0;13	16	18086	18101	27	QE	0.908432	0.920718	0.744792	0.672687	pretrained
RTLLEQLDDDQ	2	42906	Acetyl:2H(3)@Any N-term	0	11	18101	18111	27	QE	0.965344	0.972982	0.851677	0.939962	pretrained
RAEEKIKSVGGACVLVA	2	42927	Acetyl:2H(3)@Any N-term;Acetyl:2H(3)@K;Acetyl:2H(3)@K;Carbamidomethyl@C	0;5;7;13	17	18111	18127	27	QE	0.784668	0.825056	0.617713	0.204556	pretrained
RAEEKIKSVGGACVLVA	3	43002	Acetyl:2H(3)@Any N-term;Acetyl:2H(3)@K;Acetyl:2H(3)@K;Carbamidomethyl@C	0;5;7;13	17	18127	18143	27	QE	0.389395	0.479127	0.318094	0.192376	pretrained
RLLEDGEDFNLGDALDSSNSMQTIQKTTTRR	3	43009	Acetyl:2H(3)@Any N-term;Acetyl:2H(3)@K	0;26	31	18143	18173	27	QE	0.842284	0.848619	0.645131	0.754924	pretrained
RLTAIIEEAEEAPGARPQLQDAWR	3	43098	Acetyl:2H(3)@Any N-term	0	24	18173	18196	27	QE	0.955439	0.957663	0.81409	0.86434	pretrained
RLTAIIEEAEEAPGARPQLQDAWR	4	43099	Acetyl:2H(3)@Any N-term	0	24	18196	18219	27	QE	0.987934	0.989223	0.90645	0.669312	pretrained
RDEPTGEVLSLVGKLEGTR	3	43102	Acetyl:2H(3)@Any N-term;Acetyl:2H(3)@K	0;14	19	18219	18237	27	QE	0.689669	0.721859	0.513424	0.0724162	pretrained
RAEEKIKSVGGACVLVA	2	43129	Acetyl:2H(3)@Any N-term;Acetyl:2H(3)@K;Acetyl:2H(3)@K;Carbamidomethyl@C	0;5;7;13	17	18237	18253	27	QE	0.755796	0.800964	0.591359	0.374542	pretrained
RAEEKIKSVGGACVLVA	2	43133	Acetyl:2H(3)@Any N-term;Acetyl:2H(3)@K;Acetyl:2H(3)@K;Carbamidomethyl@C	0;5;7;13	17	18253	18269	27	QE	0.775666	0.817359	0.609126	0.274794	pretrained
RFDEILEASDGIMVAR	2	43167	Acetyl:2H(3)@Any N-term	0	16	18269	18284	27	QE	0.974236	0.978201	0.866831	0.871964	pretrained
RFDEILEASDGIMVAR	3	43168	Acetyl:2H(3)@Any N-term	0	16	18284	18299	27	QE	0.98179	0.985393	0.891055	0.794054	pretrained
REKIDLENTLEQEQEALVNR	3	43286	Acetyl:2H(3)@Any N-term;Acetyl:2H(3)@K	0;3	20	18299	18318	27	QE	0.886032	0.908484	0.725519	0.605878	pretrained
RAEEKIKSVGGACVLVA	3	43383	Acetyl:2H(3)@Any N-term;Acetyl:2H(3)@K;Acetyl:2H(3)@K;Carbamidomethyl@C	0;5;7;13	17	18318	18334	27	QE	0.350374	0.442128	0.291552	0.263393	pretrained
RFDEILEASDGIMVAR	3	43474	Acetyl:2H(3)@Any N-term	0	16	18334	18349	27	QE	0.988231	0.990418	0.911802	0.788497	pretrained
RLASLNAEALNNLLLER	3	43480	Acetyl:2H(3)@Any N-term	0	17	18349	18365	27	QE	0.956862	0.966955	0.835884	0.830701	pretrained
RFDEILEASDGIMVAR	2	43481	Acetyl:2H(3)@Any N-term	0	16	18365	18380	27	QE	0.913653	0.928316	0.757487	0.623757	pretrained
RFDEILEASDGIMVAR	2	43512	Acetyl:2H(3)@Any N-term	0	16	18380	18395	27	QE	0.985034	0.986827	0.896555	0.872242	pretrained
RIDEINKELNQVMEQLGDAR	2	43536	Acetyl:2H(3)@Any N-term;Acetyl:2H(3)@K;Oxidation@M	0;7;13	20	18395	18414	27	QE	0.982818	0.983551	0.884373	0.391729	pretrained
RFDEILEASDGIMVAR	3	43547	Acetyl:2H(3)@Any N-term	0	16	18414	18429	27	QE	0.98775	0.990157	0.910606	0.7783	pretrained
RFDEILEASDGIMVAR	2	43569	Acetyl:2H(3)@Any N-term	0	16	18429	18444	27	QE	0.936405	0.946785	0.791379	0.55721	pretrained
RAEEKIKSVGGACVLVA	3	43576	Acetyl:2H(3)@Any N-term;Acetyl:2H(3)@K;Acetyl:2H(3)@K;Carbamidomethyl@C	0;5;7;13	17	18444	18460	27	QE	0.370186	0.460772	0.304855	0.245971	pretrained
RVDDFKKAFSKEKMEKTKVR	3	43580	Acetyl:2H(3)@Any N-term;Acetyl:2H(3)@K;Acetyl:2H(3)@K;Acetyl:2H(3)@K;Acetyl:2H(3)@K;Acetyl:2H(3)@K;Acetyl:2H(3)@K	0;6;7;11;13;16;18	20	18460	18479	27	QE	0.823172	0.85855	0.657269	0.374942	pretrained
RDFLQLFAPR	2	43588	Acetyl:2H(3)@Any N-term	0	10	18479	18488	27	QE	0.908893	0.942158	0.782413	0.833076	pretrained
RFDEILEASDGIMVAR	2	43613	Acetyl:2H(3)@Any N-term	0	16	18488	18503	27	QE	0.704465	0.748187	0.538151	0.3601	pretrained
RILQSLEKMSSPLADAKR	3	43687	Acetyl:2H(3)@Any N-term;Acetyl:2H(3)@K;Acetyl:2H(3)@K	0;8;17	18	18503	18520	27	QE	0.761052	0.798655	0.58891	0.73726	pretrained
RDEPTGEVLSLVGKLEGTR	3	43840	Acetyl:2H(3)@Any N-term;Acetyl:2H(3)@K	0;14	19	18520	18538	27	QE	0.984302	0.986524	0.895369	0.739533	pretrained
RDEPTGEVLSLVGKLEGTR	2	43859	Acetyl:2H(3)@Any N-term;Acetyl:2H(3)@K	0;14	19	18538	18556	27	QE	0.949641	0.957603	0.813959	0.529905	pretrained
RDEPTGEVLSLVGKLEGTR	3	43877	Acetyl:2H(3)@Any N-term;Acetyl:2H(3)@K	0;14	19	18556	18574	27	QE	0.974673	0.978447	0.867585	0.793926	pretrained
RQFASQANVVGPWIQTKMEEIGR	3	43917	Acetyl:2H(3)@Any N-term;Acetyl:2H(3)@K	0;17	23	18574	18596	27	QE	0.978421	0.98194	0.878825	0.692517	pretrained
RAEEKIKSVGGACVLVA	3	43929	Acetyl:2H(3)@Any N-term;Acetyl:2H(3)@K;Acetyl:2H(3)@K;Carbamidomethyl@C	0;5;7;13	17	18596	18612	27	QE	0.357412	0.443449	0.29249	0.294826	pretrained
RQFASQANVVGPWIQTKMEEIGR	3	43948	Acetyl:2H(3)@Any N-term;Acetyl:2H(3)@K	0;17	23	18612	18634	27	QE	0.985076	0.987113	0.897687	0.62835	pretrained
RGTDECAIESIAVAATPIPKL	3	44117	Acetyl:2H(3)@Any N-term;Carbamidomethyl@C;Acetyl:2H(3)@K	0;6;20	21	18634	18654	27	QE	0.894981	0.902397	0.716388	0.437682	pretrained
RGTDECAIESIAVAATPIPKL	2	44123	Acetyl:2H(3)@Any N-term;Carbamidomethyl@C;Acetyl:2H(3)@K	0;6;20	21	18654	18674	27	QE	0.978365	0.978383	0.86739	0.649543	pretrained
RLFIQKEEQLQQILKR	3	44167	Acetyl:2H(3)@Any N-term;Acetyl:2H(3)@K;Acetyl:2H(3)@K	0;6;15	16	18674	18689	27	QE	0.938437	0.952156	0.802277	0.792248	pretrained
RAEEKIKSVGGACVLVA	3	44217	Acetyl:2H(3)@Any N-term;Acetyl:2H(3)@K;Acetyl:2H(3)@K;Carbamidomethyl@C	0;5;7;13	17	18689	18705	27	QE	0.341746	0.440241	0.290214	0.0698488	pretrained
RRGKNENESEKR	3	44338	Acetyl:2H(3)@Any N-term;Acetyl:2H(3)@K;Acetyl:2H(3)@K	0;4;11	12	18705	18716	27	QE	0.789638	0.81488	0.606394	0.480691	pretrained
RRGKNENESEKR	2	44339	Acetyl:2H(3)@Any N-term;Acetyl:2H(3)@K;Acetyl:2H(3)@K	0;4;11	12	18716	18727	27	QE	0.841748	0.860666	0.659906	0.33291	pretrained
RREQEEAAAPR	3	44343	Acetyl:2H(3)@Any N-term	0	11	18727	18737	27	QE	0.851701	0.883467	0.689594	0.793152	pretrained
RHPKGGECHAPKGTR	4	44345	Acetyl:2H(3)@Any N-term;Acetyl:2H(3)@K;Carbamidomethyl@C;Acetyl:2H(3)@K	0;4;8;12	15	18737	18751	27	QE	0.87587	0.884577	0.691105	0.356528	pretrained
REAEREVQR	3	44379	Acetyl:2H(3)@Any N-term	0	9	18751	18759	27	QE	0.674381	0.751472	0.541312	0.301136	pretrained
RQARPPDASAAR	3	44395	Acetyl:2H(3)@Any N-term	0	12	18759	18770	27	QE	0.895703	0.917464	0.739534	0.878435	pretrained
RSGNKEENKR	2	44399	Acetyl:2H(3)@Any N-term;Acetyl:2H(3)@K;Acetyl:2H(3)@K	0;5;9	10	18770	18779	27	QE	0.708455	0.753184	0.542966	0.045045	pretrained
RKQQAPKR	2	44426	Acetyl:2H(3)@Any N-term;Acetyl:2H(3)@K;Acetyl:2H(3)@K	0;2;7	8	18779	18786	27	QE	0.95693	0.963789	0.828155	0.66393	pretrained
RKASGAPAGAR	2	44437	Acetyl:2H(3)@Any N-term;Acetyl:2H(3)@K	0;2	11	18786	18796	27	QE	0.902411	0.917099	0.738951	0.754784	pretrained
RRPTKSKGSKSSR	3	44460	Acetyl:2H(3)@Any N-term;Acetyl:2H(3)@K;Acetyl:2H(3)@K;Acetyl:2H(3)@K	0;5;7;10	13	18796	18808	27	QE	0.741273	0.769818	0.559306	0.0651867	pretrained
RQSSGSATNVASTPDNRGR	3	44471	Acetyl:2H(3)@Any N-term	0	19	18808	18826	27	QE	0.921657	0.930289	0.760887	0.565374	pretrained
RAIENHNKKR	3	44497	Acetyl:2H(3)@Any N-term;Acetyl:2H(3)@K;Acetyl:2H(3)@K	0;8;9	10	18826	18835	27	QE	0.953597	0.962908	0.826066	0.700257	pretrained
RIETDERDSTNR	3	44498	Acetyl:2H(3)@Any N-term	0	12	18835	18846	27	QE	0.916695	0.924832	0.751589	0.546582	pretrained
RAKLNESHR	3	44500	Acetyl:2H(3)@Any N-term;Acetyl:2H(3)@K	0;3	9	18846	18854	27	QE	0.933089	0.948923	0.795649	0.717192	pretrained
RQPPPPPR	2	44510	Acetyl:2H(3)@Any N-term	0	8	18854	18861	27	QE	0.467783	0.609686	0.417409	0.168035	pretrained
RTPRPLTSAR	3	44552	Acetyl:2H(3)@Any N-term	0	10	18861	18870	27	QE	0.907708	0.927188	0.755563	0.940026	pretrained
RKTLSEETRQHQAR	4	44559	Acetyl:2H(3)@Any N-term;Acetyl:2H(3)@K	0;2	14	18870	18883	27	QE	0.932533	0.942254	0.782595	0.5972	pretrained
RPPGADAEGSER	2	44605	Acetyl:2H(3)@Any N-term	0	12	18883	18894	27	QE	0.756804	0.798656	0.588911	0.619239	pretrained
REALCR	2	44627	Acetyl:2H(3)@Any N-term;Carbamidomethyl@C	0;5	6	18894	18899	27	QE	0.981503	0.987494	0.89921	0.912782	pretrained
RLKEAR	2	44690	Acetyl:2H(3)@Any N-term;Acetyl:2H(3)@K	0;3	6	18899	18904	27	QE	0.973246	0.97369	0.853642	0.834587	pretrained
RDQDNMQAELNR	2	44692	Acetyl:2H(3)@Any N-term;Oxidation@M	0;6	12	18904	18915	27	QE	0.919521	0.926327	0.754104	0.29697	pretrained
RYPAHLAR	2	44730	Acetyl:2H(3)@Any N-term	0	8	18915	18922	27	QE	0.923924	0.942047	0.782203	0.854953	pretrained
RGKSGFNSKSGQR	3	44745	Acetyl:2H(3)@Any N-term;Acetyl:2H(3)@K;Acetyl:2H(3)@K	0;3;9	13	18922	18934	27	QE	0.88149	0.896301	0.707512	0.69328	pretrained
RKKKVVHR	3	44790	Acetyl:2H(3)@Any N-term;Acetyl:2H(3)@K;Acetyl:2H(3)@K;Acetyl:2H(3)@K	0;2;3;4	8	18934	18941	27	QE	0.849055	0.877909	0.682124	0.689108	pretrained
RQEGESEPPVTR	2	44798	Acetyl:2H(3)@Any N-term	0	12	18941	18952	27	QE	0.984123	0.98591	0.893006	0.816279	pretrained
RQPKYPR	2	44836	Acetyl:2H(3)@Any N-term;Acetyl:2H(3)@K	0;4	7	18952	18958	27	QE	0.907907	0.935591	0.770265	0.662174	pretrained
RSTDFTSR	2	44846	Acetyl:2H(3)@Any N-term	0	8	18958	18965	27	QE	0.913607	0.932027	0.763923	0.80624	pretrained
RLMNANGR	2	44848	Acetyl:2H(3)@Any N-term	0	8	18965	18972	27	QE	0.75307	0.784991	0.574665	0.531746	pretrained
RQPKYPR	2	44873	Acetyl:2H(3)@Any N-term;Acetyl:2H(3)@K	0;4	7	18972	18978	27	QE	0.873414	0.910907	0.729233	0.608261	pretrained
RQNEDIEPTSSR	2	44876	Acetyl:2H(3)@Any N-term	0	12	18978	18989	27	QE	0.926977	0.938551	0.775662	0.445736	pretrained
RENKRPTLEGR	3	44877	Acetyl:2H(3)@Any N-term;Acetyl:2H(3)@K	0;4	11	18989	18999	27	QE	0.924241	0.932333	0.76446	0.802251	pretrained
RKKIDR	2	44885	Acetyl:2H(3)@Any N-term;Acetyl:2H(3)@K;Acetyl:2H(3)@K	0;2;3	6	18999	19004	27	QE	0.967925	0.972633	0.850719	0.534586	pretrained
RAADALEEQQR	2	44909	Acetyl:2H(3)@Any N-term	0	11	19004	19014	27	QE	0.926029	0.934455	0.768225	0.672795	pretrained
RGGADVNIR	2	44913	Acetyl:2H(3)@Any N-term	0	9	19014	19022	27	QE	0.740584	0.789515	0.579336	0.63673	pretrained
RKQDVVNR	2	44915	Acetyl:2H(3)@Any N-term;Acetyl:2H(3)@K	0;2	8	19022	19029	27	QE	0.936696	0.950622	0.799107	0.804598	pretrained
RRNPAGSVVMER	3	44927	Acetyl:2H(3)@Any N-term	0	12	19029	19040	27	QE	0.380457	0.489752	0.325825	0.494221	pretrained
RLEEEACR	2	44943	Acetyl:2H(3)@Any N-term;Carbamidomethyl@C	0;7	8	19040	19047	27	QE	0.934064	0.952247	0.802467	0.858238	pretrained
RPGEKTYTQR	2	44957	Acetyl:2H(3)@Any N-term;Acetyl:2H(3)@K	0;5	10	19047	19056	27	QE	0.845696	0.86985	0.671569	0.555598	pretrained
RELGCSSVR	2	44967	Acetyl:2H(3)@Any N-term;Carbamidomethyl@C	0;5	9	19056	19064	27	QE	0.965047	0.969497	0.842356	0.605938	pretrained
REDFEAR	2	44968	Acetyl:2H(3)@Any N-term	0	7	19064	19070	27	QE	0.832271	0.869421	0.671016	0.672174	pretrained
RTGQEVAQAQES	2	44989	Acetyl:2H(3)@Any N-term	0	12	19070	19081	27	QE	0.959449	0.965388	0.832017	0.742777	pretrained
RGAGQEKVDR	2	44994	Acetyl:2H(3)@Any N-term;Acetyl:2H(3)@K	0;7	10	19081	19090	27	QE	0.902647	0.907192	0.723558	0.297426	pretrained
RYRESKKIDR	3	45005	Acetyl:2H(3)@Any N-term;Acetyl:2H(3)@K;Acetyl:2H(3)@K	0;6;7	10	19090	19099	27	QE	0.933928	0.938312	0.775223	0.412741	pretrained
RKHKKGQSEEIQKKR	4	45009	Acetyl:2H(3)@Any N-term;Acetyl:2H(3)@K;Acetyl:2H(3)@K;Acetyl:2H(3)@K;Acetyl:2H(3)@K;Acetyl:2H(3)@K	0;2;4;5;13;14	15	19099	19113	27	QE	0.887706	0.898766	0.71107	0.591046	pretrained
RRQQSEISAAVER	3	45015	Acetyl:2H(3)@Any N-term	0	13	19113	19125	27	QE	0.974632	0.978898	0.868985	0.591294	pretrained
RENLNSYQR	2	45027	Acetyl:2H(3)@Any N-term	0	9	19125	19133	27	QE	0.921024	0.925168	0.752151	0.664223	pretrained
RAEVHKVSRPENEQLRNDNKR	5	45044	Acetyl:2H(3)@Any N-term;Acetyl:2H(3)@K;Acetyl:2H(3)@K	0;6;20	21	19133	19153	27	QE	0.898233	0.904844	0.720025	0.437295	pretrained
RTKTEISEMNR	2	45072	Acetyl:2H(3)@Any N-term;Acetyl:2H(3)@K;Oxidation@M	0;3;9	11	19153	19163	27	QE	0.94492	0.953045	0.804139	0.410507	pretrained
RDDPGEFR	2	45079	Acetyl:2H(3)@Any N-term	0	8	19163	19170	27	QE	0.971993	0.977016	0.863246	0.528736	pretrained
RSDPNFKNR	2	45085	Acetyl:2H(3)@Any N-term;Acetyl:2H(3)@K	0;7	9	19170	19178	27	QE	0.988058	0.989346	0.906988	0.622067	pretrained
RSDPNFKNR	2	45118	Acetyl:2H(3)@Any N-term;Acetyl:2H(3)@K	0;7	9	19178	19186	27	QE	0.978081	0.980371	0.873656	0.544172	pretrained
RAEVHKVSRPENEQLR	4	45154	Acetyl:2H(3)@Any N-term;Acetyl:2H(3)@K	0;6	16	19186	19201	27	QE	0.803798	0.829645	0.622915	0.750097	pretrained
RRTEEGPTLSYGR	3	45220	Acetyl:2H(3)@Any N-term	0	13	19201	19213	27	QE	0.929586	0.944345	0.786605	0.616696	pretrained
RGEEGHDPKEPEQLR	3	45237	Acetyl:2H(3)@Any N-term;Acetyl:2H(3)@K	0;9	15	19213	19227	27	QE	0.838033	0.858834	0.657621	0.805605	pretrained
RGEEGHDPKEPEQLR	2	45239	Acetyl:2H(3)@Any N-term;Acetyl:2H(3)@K	0;9	15	19227	19241	27	QE	0.997267	0.996842	0.949393	0.68691	pretrained
RMFGGPGTASRPSSSR	3	45252	Acetyl:2H(3)@Any N-term	0	16	19241	19256	27	QE	0.798365	0.825336	0.618029	0.213587	pretrained
RTMTNALR	2	45275	Acetyl:2H(3)@Any N-term	0	8	19256	19263	27	QE	0.968351	0.973039	0.851836	0.630542	pretrained
RYIKNPR	2	45299	Acetyl:2H(3)@Any N-term;Acetyl:2H(3)@K	0;4	7	19263	19269	27	QE	0.851389	0.900381	0.713424	0.636957	pretrained
RGEEGHDPKEPEQLR	3	45317	Acetyl:2H(3)@Any N-term;Acetyl:2H(3)@K	0;9	15	19269	19283	27	QE	0.816387	0.839458	0.634255	0.662645	pretrained
RQAVDVSPLRR	3	45324	Acetyl:2H(3)@Any N-term	0	11	19283	19293	27	QE	0.93573	0.942535	0.78313	0.610413	pretrained
RLSQPESAEKHVTQR	3	45353	Acetyl:2H(3)@Any N-term;Acetyl:2H(3)@K	0;10	15	19293	19307	27	QE	0.958818	0.96559	0.83251	0.721292	pretrained
RIAVPSR	2	45424	Acetyl:2H(3)@Any N-term	0	7	19307	19313	27	QE	0.966488	0.974099	0.854789	0.752609	pretrained
RPFDPNDR	2	45475	Acetyl:2H(3)@Any N-term	0	8	19313	19320	27	QE	0.954728	0.961323	0.822363	0.735085	pretrained
RLSYNTASNKTR	2	45585	Acetyl:2H(3)@Any N-term;Acetyl:2H(3)@K	0;10	12	19320	19331	27	QE	0.922804	0.935241	0.769635	0.505215	pretrained
RLSYNTASNKTR	3	45595	Acetyl:2H(3)@Any N-term;Acetyl:2H(3)@K	0;10	12	19331	19342	27	QE	0.884068	0.902734	0.716886	0.723397	pretrained
REHAKAVVSLR	3	45612	Acetyl:2H(3)@Any N-term;Acetyl:2H(3)@K	0;5	11	19342	19352	27	QE	0.726717	0.786661	0.576384	0.849906	pretrained
RLAEDEAFQRR	3	45636	Acetyl:2H(3)@Any N-term	0	11	19352	19362	27	QE	0.896214	0.91827	0.740827	0.714259	pretrained
RKSIKTYR	2	45683	Acetyl:2H(3)@Any N-term;Acetyl:2H(3)@K;Acetyl:2H(3)@K	0;2;5	8	19362	19369	27	QE	0.875921	0.896516	0.707821	0.556924	pretrained
RGNPLHLCKER	3	45711	Acetyl:2H(3)@Any N-term;Carbamidomethyl@C;Acetyl:2H(3)@K	0;8;9	11	19369	19379	27	QE	0.951896	0.960313	0.820043	0.69606	pretrained
RQSMKEKEHQVVR	3	45731	Acetyl:2H(3)@Any N-term;Acetyl:2H(3)@K;Acetyl:2H(3)@K	0;5;7	13	19379	19391	27	QE	0.84274	0.87495	0.678211	0.16777	pretrained
RQELLEAR	2	45737	Acetyl:2H(3)@Any N-term	0	8	19391	19398	27	QE	0.98747	0.989864	0.909283	0.93815	pretrained
RAQLPKYQR	2	45753	Acetyl:2H(3)@Any N-term;Acetyl:2H(3)@K	0;6	9	19398	19406	27	QE	0.888722	0.915019	0.73565	0.76063	pretrained
RAQLPKYQR	3	45772	Acetyl:2H(3)@Any N-term;Acetyl:2H(3)@K	0;6	9	19406	19414	27	QE	0.959428	0.967871	0.838187	0.846957	pretrained
RLQAQRNELNAKVR	3	45794	Acetyl:2H(3)@Any N-term;Acetyl:2H(3)@K	0;12	14	19414	19427	27	QE	0.831977	0.860998	0.66032	0.42662	pretrained
RTKTEISEMNR	2	45808	Acetyl:2H(3)@Any N-term;Acetyl:2H(3)@K	0;3	11	19427	19437	27	QE	0.924679	0.940361	0.779026	0.645028	pretrained
RTKTEISEMNR	2	45814	Acetyl:2H(3)@Any N-term;Acetyl:2H(3)@K;Oxidation@M	0;3;9	11	19437	19447	27	QE	0.903714	0.903399	0.717872	0.487711	pretrained
RTKTEISEMNR	3	45821	Acetyl:2H(3)@Any N-term;Acetyl:2H(3)@K	0;3	11	19447	19457	27	QE	0.913235	0.926136	0.75378	0.839775	pretrained
RTKTEISEMNR	2	45859	Acetyl:2H(3)@Any N-term;Acetyl:2H(3)@K	0;3	11	19457	19467	27	QE	0.863937	0.886005	0.69306	0.524953	pretrained
RVEKEALAR	2	45868	Acetyl:2H(3)@Any N-term;Acetyl:2H(3)@K	0;4	9	19467	19475	27	QE	0.946136	0.95638	0.811274	0.583578	pretrained
RQVDQLTNDKAR	2	45870	Acetyl:2H(3)@Any N-term;Acetyl:2H(3)@K	0;10	12	19475	19486	27	QE	0.969482	0.974907	0.857083	0.636011	pretrained
RRQLQGLAAPEAGTQEEQEDQEPRPR	4	45872	Acetyl:2H(3)@Any N-term	0	26	19486	19511	27	QE	0.822944	0.841484	0.636635	0.598056	pretrained
RQVDQLTNDKAR	3	45874	Acetyl:2H(3)@Any N-term;Acetyl:2H(3)@K	0;10	12	19511	19522	27	QE	0.965626	0.972416	0.850125	0.883298	pretrained
RGPPEKEWR	2	45891	Acetyl:2H(3)@Any N-term;Acetyl:2H(3)@K	0;6	9	19522	19530	27	QE	0.896349	0.91628	0.737646	0.919355	pretrained
RLAKKEAKER	2	45895	Acetyl:2H(3)@Any N-term;Acetyl:2H(3)@K;Acetyl:2H(3)@K;Acetyl:2H(3)@K	0;4;5;8	10	19530	19539	27	QE	0.93618	0.94546	0.788774	0.519048	pretrained
RAGPGSEELTVTNAR	2	45901	Acetyl:2H(3)@Any N-term	0	15	19539	19553	27	QE	0.895321	0.914592	0.734976	0.413158	pretrained
RIEQHYFEDR	3	45903	Acetyl:2H(3)@Any N-term	0	10	19553	19562	27	QE	0.899244	0.919428	0.742696	0.828443	pretrained
RGAPAAATAPAPTAHKAKKAAPGAAGSR	3	45909	Acetyl:2H(3)@Any N-term;Acetyl:2H(3)@K;Acetyl:2H(3)@K;Acetyl:2H(3)@K	0;16;18;19	28	19562	19589	27	QE	0.83742	0.852265	0.649543	0.512447	pretrained
RKQEELLR	2	45913	Acetyl:2H(3)@Any N-term;Acetyl:2H(3)@K	0;2	8	19589	19596	27	QE	0.942794	0.948514	0.794826	0.831418	pretrained
RGAPAAATAPAPTAHKAKKAAPGAAGSR	4	45915	Acetyl:2H(3)@Any N-term;Acetyl:2H(3)@K;Acetyl:2H(3)@K;Acetyl:2H(3)@K	0;16;18;19	28	19596	19623	27	QE	0.844631	0.85798	0.656561	0.504806	pretrained
RQLESGGFEAR	2	45918	Acetyl:2H(3)@Any N-term	0	11	19623	19633	27	QE	0.864868	0.887428	0.69502	0.767355	pretrained
RDEFLGR	2	45925	Acetyl:2H(3)@Any N-term	0	7	19633	19639	27	QE	0.943567	0.964525	0.829922	0.839565	pretrained
REKAEGDVAALNRR	3	45928	Acetyl:2H(3)@Any N-term;Acetyl:2H(3)@K	0;3	14	19639	19652	27	QE	0.962248	0.966463	0.834659	0.51716	pretrained
RLKEEIERR	3	45989	Acetyl:2H(3)@Any N-term;Acetyl:2H(3)@K	0;3	9	19652	19660	27	QE	0.911059	0.933262	0.766101	0.784641	pretrained
RFNTANDDNVTQVR	2	46005	Acetyl:2H(3)@Any N-term	0	14	19660	19673	27	QE	0.959574	0.96598	0.833466	0.69632	pretrained
RPEVDGEKYQKGTR	2	46032	Acetyl:2H(3)@Any N-term;Acetyl:2H(3)@K;Acetyl:2H(3)@K	0;8;11	14	19673	19686	27	QE	0.845817	0.863162	0.663038	0.112525	pretrained
RTFEQRVEDVR	3	46041	Acetyl:2H(3)@Any N-term	0	11	19686	19696	27	QE	0.981157	0.982158	0.879561	0.688462	pretrained
RYNIPHGPVVGSTR	3	46065	Acetyl:2H(3)@Any N-term	0	14	19696	19709	27	QE	0.940487	0.950363	0.798576	0.594766	pretrained
RKVEKLER	2	46101	Acetyl:2H(3)@Any N-term;Acetyl:2H(3)@K;Acetyl:2H(3)@K	0;2;5	8	19709	19716	27	QE	0.952832	0.957477	0.813681	0.833333	pretrained
RRPTLGVQLDDKR	3	46223	Acetyl:2H(3)@Any N-term;Acetyl:2H(3)@K	0;12	13	19716	19728	27	QE	0.958254	0.962157	0.824302	0.751194	pretrained
RKTTPKEPTEKKMAR	3	46278	Acetyl:2H(3)@Any N-term;Acetyl:2H(3)@K;Acetyl:2H(3)@K;Acetyl:2H(3)@K;Acetyl:2H(3)@K	0;2;6;11;12	15	19728	19742	27	QE	0.939492	0.947471	0.79274	0.669959	pretrained
RREDNLNDSSQQLQDSLR	3	46289	Acetyl:2H(3)@Any N-term	0	18	19742	19759	27	QE	0.931781	0.942916	0.783857	0.597206	pretrained
RLELPR	2	46304	Acetyl:2H(3)@Any N-term	0	6	19759	19764	27	QE	0.699562	0.800295	0.590647	0.953383	pretrained
RVMEPLTASR	2	46349	Acetyl:2H(3)@Any N-term	0	10	19764	19773	27	QE	0.900574	0.916217	0.737547	0.549936	pretrained
RFPDLNR	2	46430	Acetyl:2H(3)@Any N-term	0	7	19773	19779	27	QE	0.905571	0.929809	0.760057	0.861304	pretrained
RVFNDCRDIIQR	3	46440	Acetyl:2H(3)@Any N-term;Carbamidomethyl@C	0;6	12	19779	19790	27	QE	0.963353	0.967614	0.837537	0.884144	pretrained
RELFEER	2	46468	Acetyl:2H(3)@Any N-term	0	7	19790	19796	27	QE	0.944086	0.957413	0.81354	0.972174	pretrained
RPQYSNPPVQGEVMEGADNQGAGEQGRPVR	3	46477	Acetyl:2H(3)@Any N-term	0	30	19796	19825	27	QE	0.805985	0.815226	0.606775	0.708127	pretrained
RKQEELQQLEQQRR	3	46492	Acetyl:2H(3)@Any N-term;Acetyl:2H(3)@K	0;2	14	19825	19838	27	QE	0.945377	0.954845	0.807958	0.704047	pretrained
RSEKIWPR	2	46538	Acetyl:2H(3)@Any N-term;Acetyl:2H(3)@K	0;4	8	19838	19845	27	QE	0.85577	0.897186	0.708784	0.828955	pretrained
RKMRPFEGFQR	3	46581	Acetyl:2H(3)@Any N-term;Acetyl:2H(3)@K	0;2	11	19845	19855	27	QE	0.851425	0.873645	0.676501	0.783114	pretrained
RFPLAPGR	2	46700	Acetyl:2H(3)@Any N-term	0	8	19855	19862	27	QE	0.884262	0.916545	0.738067	0.895183	pretrained
RDQAVMISGESGAGKTEATKR	3	46706	Acetyl:2H(3)@Any N-term;Acetyl:2H(3)@K;Acetyl:2H(3)@K	0;15;20	21	19862	19882	27	QE	0.980881	0.984394	0.887381	0.746308	pretrained
RPKSESQGNATKNDDLNKPINKGR	3	46732	Acetyl:2H(3)@Any N-term;Acetyl:2H(3)@K;Acetyl:2H(3)@K;Acetyl:2H(3)@K;Acetyl:2H(3)@K	0;3;12;18;22	24	19882	19905	27	QE	0.96581	0.966197	0.834002	0.19865	pretrained
RQDPQVVSPFSR	2	46757	Acetyl:2H(3)@Any N-term	0	12	19905	19916	27	QE	0.975242	0.977252	0.863951	0.523538	pretrained
RRVGLKAPGIIPR	3	46796	Acetyl:2H(3)@Any N-term;Acetyl:2H(3)@K	0;6	13	19916	19928	27	QE	0.727156	0.751157	0.541007	0.176183	pretrained
RALIVLAHSER	3	46880	Acetyl:2H(3)@Any N-term	0	11	19928	19938	27	QE	0.968652	0.975431	0.858588	0.907411	pretrained
RELPPDQAEYCIAR	2	46900	Acetyl:2H(3)@Any N-term;Carbamidomethyl@C	0;11	14	19938	19951	27	QE	0.949766	0.957967	0.814764	0.627465	pretrained
RLKPFGVQR	2	46966	Acetyl:2H(3)@Any N-term;Acetyl:2H(3)@K	0;3	9	19951	19959	27	QE	0.97877	0.982617	0.881125	0.864186	pretrained
RGDLPFVVPRR	3	46975	Acetyl:2H(3)@Any N-term	0	11	19959	19969	27	QE	0.972416	0.976409	0.861444	0.722139	pretrained
RRELLLTGPGLEER	3	46982	Acetyl:2H(3)@Any N-term	0	14	19969	19982	27	QE	0.954836	0.962063	0.824082	0.836037	pretrained
RDDAYWPEAKR	2	46984	Acetyl:2H(3)@Any N-term;Acetyl:2H(3)@K	0;10	11	19982	19992	27	QE	0.929357	0.943976	0.785894	0.712476	pretrained
RPDQQLQGEGKIIDR	3	46990	Acetyl:2H(3)@Any N-term;Acetyl:2H(3)@K	0;11	15	19992	20006	27	QE	0.931304	0.946175	0.790175	0.729768	pretrained
RPDQQLQGEGKIIDR	2	46991	Acetyl:2H(3)@Any N-term;Acetyl:2H(3)@K	0;11	15	20006	20020	27	QE	0.926852	0.936316	0.771575	0.32946	pretrained
RPWEKNSTTLPR	2	46993	Acetyl:2H(3)@Any N-term;Acetyl:2H(3)@K	0;5	12	20020	20031	27	QE	0.740991	0.788902	0.578701	0.620085	pretrained
RLEAEAGPAGELAGAR	2	47023	Acetyl:2H(3)@Any N-term	0	16	20031	20046	27	QE	0.825885	0.856635	0.654898	0.216171	pretrained
RLAELSDYR	2	47025	Acetyl:2H(3)@Any N-term	0	9	20046	20054	27	QE	0.968447	0.970669	0.84543	0.688966	pretrained
RQFPNKDALVR	2	47137	Acetyl:2H(3)@Any N-term;Acetyl:2H(3)@K	0;6	11	20054	20064	27	QE	0.907478	0.922992	0.748528	0.583865	pretrained
RVDPVYIHLAER	3	47159	Acetyl:2H(3)@Any N-term	0	12	20064	20075	27	QE	0.934664	0.95066	0.799184	0.664482	pretrained
REVLQNQLGIRPPTR	3	47160	Acetyl:2H(3)@Any N-term	0	15	20075	20089	27	QE	0.780413	0.811826	0.603053	0.538585	pretrained
RVYEILR	2	47178	Acetyl:2H(3)@Any N-term	0	7	20089	20095	27	QE	0.95706	0.964269	0.829305	0.613913	pretrained
RRLTAEDLFEAR	3	47199	Acetyl:2H(3)@Any N-term	0	12	20095	20106	27	QE	0.956823	0.963666	0.827864	0.636293	pretrained
RVGMADANSPPKPLSKPR	3	47251	Acetyl:2H(3)@Any N-term;Acetyl:2H(3)@K;Acetyl:2H(3)@K	0;12;16	18	20106	20123	27	QE	0.948609	0.954912	0.808102	0.771042	pretrained
RVGMADANSPPKPLSKPR	2	47267	Acetyl:2H(3)@Any N-term;Acetyl:2H(3)@K;Acetyl:2H(3)@K	0;12;16	18	20123	20140	27	QE	0.935525	0.940599	0.77947	0.677654	pretrained
RIQLVEEELDRAQER	3	47295	Acetyl:2H(3)@Any N-term	0	15	20140	20154	27	QE	0.665178	0.748591	0.538538	0.505571	pretrained
RAKFKFPGR	2	47317	Acetyl:2H(3)@Any N-term;Acetyl:2H(3)@K;Acetyl:2H(3)@K	0;3;5	9	20154	20162	27	QE	0.92665	0.944976	0.787831	0.85044	pretrained
RKIMSSPLSKELR	2	47374	Acetyl:2H(3)@Any N-term;Acetyl:2H(3)@K;Oxidation@M;Acetyl:2H(3)@K	0;2;4;10	13	20162	20174	27	QE	0.939978	0.943361	0.78471	0.828702	pretrained
RTLALQQQLQAVR	2	47425	Acetyl:2H(3)@Any N-term	0	13	20174	20186	27	QE	0.939575	0.939371	0.777179	0.259607	pretrained
RGVTIKPTVDDD	2	47525	Acetyl:2H(3)@Any N-term;Acetyl:2H(3)@K	0;6	12	20186	20197	27	QE	0.975585	0.978394	0.867424	0.620225	pretrained
RKTVFSPTLPAAR	2	47580	Acetyl:2H(3)@Any N-term;Acetyl:2H(3)@K	0;2	13	20197	20209	27	QE	0.944526	0.954349	0.806899	0.718031	pretrained
RKTVFSPTLPAAR	3	47589	Acetyl:2H(3)@Any N-term;Acetyl:2H(3)@K	0;2	13	20209	20221	27	QE	0.971187	0.973132	0.852091	0.749837	pretrained
RVQELLDAAR	2	47764	Acetyl:2H(3)@Any N-term	0	10	20221	20230	27	QE	0.961358	0.967957	0.838405	0.68816	pretrained
REPETPLAVPGLR	2	47809	Acetyl:2H(3)@Any N-term	0	13	20230	20242	27	QE	0.922421	0.937719	0.774134	0.808456	pretrained
RLRLPLEAALR	3	47847	Acetyl:2H(3)@Any N-term	0	11	20242	20252	27	QE	0.930456	0.941798	0.78173	0.747186	pretrained
RIEFAEQINKMEARPR	3	47902	Acetyl:2H(3)@Any N-term;Acetyl:2H(3)@K	0;10	16	20252	20267	27	QE	0.825596	0.863492	0.663455	0.753959	pretrained
RKVPGEGLPLPKTPEKR	3	47993	Acetyl:2H(3)@Any N-term;Acetyl:2H(3)@K;Acetyl:2H(3)@K;Acetyl:2H(3)@K	0;2;12;16	17	20267	20283	27	QE	0.797906	0.822388	0.614717	0.354281	pretrained
RKVPGEGLPLPKTPEKR	2	47997	Acetyl:2H(3)@Any N-term;Acetyl:2H(3)@K;Acetyl:2H(3)@K;Acetyl:2H(3)@K	0;2;12;16	17	20283	20299	27	QE	0.796636	0.831275	0.624777	0.665041	pretrained
RKTPVIVTLKENER	3	48019	Acetyl:2H(3)@Any N-term;Acetyl:2H(3)@K;Acetyl:2H(3)@K	0;2;10	14	20299	20312	27	QE	0.967355	0.972876	0.851387	0.711731	pretrained
RKTPVIVTLKENER	2	48020	Acetyl:2H(3)@Any N-term;Acetyl:2H(3)@K;Acetyl:2H(3)@K	0;2;10	14	20312	20325	27	QE	0.906637	0.922356	0.747477	0.805985	pretrained
RLEAAYLDLQR	2	48085	Acetyl:2H(3)@Any N-term	0	11	20325	20335	27	QE	0.98009	0.982755	0.881599	0.895028	pretrained
RLEAAYLDLQR	3	48090	Acetyl:2H(3)@Any N-term	0	11	20335	20345	27	QE	0.996327	0.996975	0.950469	0.920169	pretrained
RIQLVEEELDR	2	48248	Acetyl:2H(3)@Any N-term	0	11	20345	20355	27	QE	0.980227	0.983901	0.885611	0.90272	pretrained
RIQLVEEELDR	2	48291	Acetyl:2H(3)@Any N-term	0	11	20355	20365	27	QE	0.970187	0.975757	0.859533	0.666323	pretrained
RHAEQERDELADEITNSASGKSALLDEKR	4	48325	Acetyl:2H(3)@Any N-term;Acetyl:2H(3)@K;Acetyl:2H(3)@K	0;21;28	29	20365	20393	27	QE	0.938426	0.944112	0.786155	0.485013	pretrained
RAEDGSVIDYELIDQDAR	3	48347	Acetyl:2H(3)@Any N-term	0	18	20393	20410	27	QE	0.781685	0.817354	0.60912	0.730122	pretrained
RKQYPISLVLAPTR	3	48378	Acetyl:2H(3)@Any N-term;Acetyl:2H(3)@K	0;2	14	20410	20423	27	QE	0.918363	0.932592	0.764916	0.646077	pretrained
RVPFSLLR	2	48384	Acetyl:2H(3)@Any N-term	0	8	20423	20430	27	QE	0.932179	0.948362	0.794522	0.742474	pretrained
RLLPSLIGR	2	48429	Acetyl:2H(3)@Any N-term	0	9	20430	20438	27	QE	0.941664	0.956014	0.81048	0.768328	pretrained
RAEDGSVIDYELIDQDAR	3	48436	Acetyl:2H(3)@Any N-term	0	18	20438	20455	27	QE	0.974682	0.979034	0.86941	0.711494	pretrained
RKDAKSVKIKKNKDNVKFKVR	3	48491	Acetyl:2H(3)@Any N-term;Acetyl:2H(3)@K;Acetyl:2H(3)@K;Acetyl:2H(3)@K;Acetyl:2H(3)@K;Acetyl:2H(3)@K;Acetyl:2H(3)@K;Acetyl:2H(3)@K;Acetyl:2H(3)@K	0;2;5;8;10;11;13;17;19	21	20455	20475	27	QE	0.670082	0.741132	0.531422	0.220077	pretrained
RGVDPAPLAKHGLTEELLSR	3	48498	Acetyl:2H(3)@Any N-term;Acetyl:2H(3)@K	0;10	20	20475	20494	27	QE	0.963635	0.965669	0.832703	0.532085	pretrained
RKDAKSVKIKKNKDNVKFKVR	3	48732	Acetyl:2H(3)@Any N-term;Acetyl:2H(3)@K;Acetyl:2H(3)@K;Acetyl:2H(3)@K;Acetyl:2H(3)@K;Acetyl:2H(3)@K;Acetyl:2H(3)@K;Acetyl:2H(3)@K;Acetyl:2H(3)@K	0;2;5;8;10;11;13;17;19	21	20494	20514	27	QE	0.695896	0.764666	0.554192	0.138631	pretrained
RKDAKSVKIKKNKDNVKFKVR	4	48735	Acetyl:2H(3)@Any N-term;Acetyl:2H(3)@K;Acetyl:2H(3)@K;Acetyl:2H(3)@K;Acetyl:2H(3)@K;Acetyl:2H(3)@K;Acetyl:2H(3)@K;Acetyl:2H(3)@K;Acetyl:2H(3)@K	0;2;5;8;10;11;13;17;19	21	20514	20534	27	QE	0.904675	0.916332	0.737729	0.38774	pretrained
RGVPTQAKGLCGSCNKPIAGQVVTALGR	3	48836	Acetyl:2H(3)@Any N-term;Acetyl:2H(3)@K;Carbamidomethyl@C;Carbamidomethyl@C;Acetyl:2H(3)@K	0;8;11;14;16	28	20534	20561	27	QE	0.95208	0.951938	0.801825	0.444516	pretrained
RWDDDVVFKNCAKGVDDQKKDKR	3	48875	Acetyl:2H(3)@Any N-term;Acetyl:2H(3)@K;Carbamidomethyl@C;Acetyl:2H(3)@K;Acetyl:2H(3)@K;Acetyl:2H(3)@K;Acetyl:2H(3)@K	0;9;11;13;19;20;22	23	20561	20583	27	QE	0.91479	0.927039	0.75531	0.531418	pretrained
RGDALIEMESEQDVQKALEKHR	3	48876	Acetyl:2H(3)@Any N-term;Acetyl:2H(3)@K;Acetyl:2H(3)@K	0;16;20	22	20583	20604	27	QE	0.94362	0.953269	0.804609	0.389764	pretrained
RGDALIEMESEQDVQKALEKHR	4	48884	Acetyl:2H(3)@Any N-term;Acetyl:2H(3)@K;Acetyl:2H(3)@K	0;16;20	22	20604	20625	27	QE	0.947587	0.950656	0.799177	0.730262	pretrained
RIVPGQFLAVDPKGR	2	48917	Acetyl:2H(3)@Any N-term;Acetyl:2H(3)@K	0;13	15	20625	20639	27	QE	0.99583	0.995853	0.942004	0.482433	pretrained
RVNQAIWLLCTGAR	2	49023	Acetyl:2H(3)@Any N-term;Carbamidomethyl@C	0;10	14	20639	20652	27	QE	0.928806	0.944816	0.78752	0.656109	pretrained
RVNQAIWLLCTGAR	3	49040	Acetyl:2H(3)@Any N-term;Carbamidomethyl@C	0;10	14	20652	20665	27	QE	0.985821	0.988245	0.902293	0.864253	pretrained
RKKEPELFQTVAEGLR	3	49294	Acetyl:2H(3)@Any N-term;Acetyl:2H(3)@K;Acetyl:2H(3)@K	0;2;3	16	20665	20680	27	QE	0.75884	0.800797	0.591181	0.460795	pretrained
RKKEPELFQTVAEGLR	2	49298	Acetyl:2H(3)@Any N-term;Acetyl:2H(3)@K;Acetyl:2H(3)@K	0;2;3	16	20680	20695	27	QE	0.914576	0.923583	0.749507	0.375688	pretrained
RFDEILEASDGIMVAR	3	49341	Acetyl:2H(3)@Any N-term;Oxidation@M	0;13	16	20695	20710	27	QE	0.982962	0.985844	0.892753	0.709586	pretrained
RFDEILEASDGIMVAR	2	49348	Acetyl:2H(3)@Any N-term;Oxidation@M	0;13	16	20710	20725	27	QE	0.918364	0.929255	0.759101	0.845263	pretrained
RFDEILEASDGIMVAR	3	49402	Acetyl:2H(3)@Any N-term;Oxidation@M	0;13	16	20725	20740	27	QE	0.978096	0.981793	0.878333	0.687608	pretrained
RFDEILEASDGIMVAR	2	49410	Acetyl:2H(3)@Any N-term;Oxidation@M	0;13	16	20740	20755	27	QE	0.902837	0.915861	0.736981	0.778438	pretrained
RVSEKVSHVLAALQAGNR	3	49459	Acetyl:2H(3)@Any N-term;Acetyl:2H(3)@K	0;5	18	20755	20772	27	QE	0.867935	0.886895	0.694285	0.679658	pretrained
RFDEILEASDGIMVAR	2	49621	Acetyl:2H(3)@Any N-term	0	16	20772	20787	27	QE	0.96529	0.970241	0.844301	0.732926	pretrained
RYDDPEVQKDIKNVPFKIVR	3	49672	Acetyl:2H(3)@Any N-term;Acetyl:2H(3)@K;Acetyl:2H(3)@K;Acetyl:2H(3)@K	0;9;12;17	20	20787	20806	27	QE	0.972189	0.975088	0.857601	0.627792	pretrained
RYDDPEVQKDIKNVPFKIVR	2	49677	Acetyl:2H(3)@Any N-term;Acetyl:2H(3)@K;Acetyl:2H(3)@K;Acetyl:2H(3)@K	0;9;12;17	20	20806	20825	27	QE	0.958987	0.961074	0.821789	0.422912	pretrained
RVEELGDLAQAHIQQLSEAAGEDDHFLIR	4	49767	Acetyl:2H(3)@Any N-term	0	29	20825	20853	27	QE	0.928124	0.942483	0.783031	0.628242	pretrained
RSIKKITQELSDLQQER	3	49781	Acetyl:2H(3)@Any N-term;Acetyl:2H(3)@K;Acetyl:2H(3)@K	0;4;5	17	20853	20869	27	QE	0.859251	0.88159	0.687053	0.712958	pretrained
RSIKKITQELSDLQQER	3	49782	Acetyl:2H(3)@Any N-term;Acetyl:2H(3)@K;Acetyl:2H(3)@K	0;4;5	17	20869	20885	27	QE	0.840613	0.867211	0.668179	0.7375	pretrained
RVDDFKKAFSKEKMEKTKVR	3	49821	Acetyl:2H(3)@Any N-term;Acetyl:2H(3)@K;Acetyl:2H(3)@K;Acetyl:2H(3)@K;Acetyl:2H(3)@K;Acetyl:2H(3)@K;Acetyl:2H(3)@K	0;6;7;11;13;16;18	20	20885	20904	27	QE	0.83068	0.86719	0.668153	0.282105	pretrained
RTEKKLKEIFMQVEDERR	3	49831	Acetyl:2H(3)@Any N-term;Acetyl:2H(3)@K;Acetyl:2H(3)@K;Acetyl:2H(3)@K	0;4;5;7	18	20904	20921	27	QE	0.472221	0.534436	0.358952	-0.327385	pretrained
RTEKKLKEIFMQVEDERR	4	49837	Acetyl:2H(3)@Any N-term;Acetyl:2H(3)@K;Acetyl:2H(3)@K;Acetyl:2H(3)@K	0;4;5;7	18	20921	20938	27	QE	0.854324	0.880601	0.685722	0.453353	pretrained
RESAAADAGFALFEKKGALAER	3	49864	Acetyl:2H(3)@Any N-term;Acetyl:2H(3)@K;Acetyl:2H(3)@K	0;15;16	22	20938	20959	27	QE	0.956067	0.963575	0.827647	0.755827	pretrained
RFDEILEASDGIMVAR	2	49879	Acetyl:2H(3)@Any N-term	0	16	20959	20974	27	QE	0.978368	0.981041	0.875838	0.699222	pretrained
RFDEILEASDGIMVAR	3	49880	Acetyl:2H(3)@Any N-term	0	16	20974	20989	27	QE	0.988884	0.991076	0.914889	0.833954	pretrained
RFDEILEASDGIMVAR	2	49915	Acetyl:2H(3)@Any N-term	0	16	20989	21004	27	QE	0.984468	0.986111	0.893774	0.803918	pretrained
RFDEILEASDGIMVAR	3	49916	Acetyl:2H(3)@Any N-term	0	16	21004	21019	27	QE	0.986733	0.98935	0.907006	0.787997	pretrained
RFDEILEASDGIMVAR	3	49984	Acetyl:2H(3)@Any N-term	0	16	21019	21034	27	QE	0.988283	0.9904	0.911716	0.759072	pretrained
RFDEILEASDGIMVAR	3	50021	Acetyl:2H(3)@Any N-term	0	16	21034	21049	27	QE	0.985183	0.988095	0.901667	0.864435	pretrained
RFDEILEASDGIMVAR	3	50050	Acetyl:2H(3)@Any N-term	0	16	21049	21064	27	QE	0.982011	0.985534	0.891583	0.785941	pretrained
RKHTGGKILGFFF	2	50053	Acetyl:2H(3)@Any N-term;Acetyl:2H(3)@K;Acetyl:2H(3)@K	0;2;7	13	21064	21076	27	QE	0.380111	0.489471	0.32562	0.648122	pretrained
RFDEILEASDGIMVAR	2	50063	Acetyl:2H(3)@Any N-term	0	16	21076	21091	27	QE	0.728355	0.778573	0.568112	0.618283	pretrained
RSKTNKAKTLATWATKELR	3	50088	Acetyl:2H(3)@Any N-term;Acetyl:2H(3)@K;Acetyl:2H(3)@K;Acetyl:2H(3)@K;Acetyl:2H(3)@K	0;3;6;8;16	19	21091	21109	27	QE	0.89882	0.91319	0.732778	0.479597	pretrained
RFDEILEASDGIMVAR	3	50092	Acetyl:2H(3)@Any N-term	0	16	21109	21124	27	QE	0.961969	0.969549	0.842492	0.618033	pretrained
RLLEDGEDFNLGDALDSSNSMQTIQKTTTR	3	50098	Acetyl:2H(3)@Any N-term;Oxidation@M;Acetyl:2H(3)@K	0;21;26	30	21124	21153	27	QE	0.914507	0.919325	0.742529	0.26634	pretrained
RFDEILEASDGIMVAR	3	50122	Acetyl:2H(3)@Any N-term	0	16	21153	21168	27	QE	0.983621	0.98681	0.896488	0.790609	pretrained
RFDEILEASDGIMVAR	2	50149	Acetyl:2H(3)@Any N-term	0	16	21168	21183	27	QE	0.807191	0.841004	0.63607	0.534148	pretrained
RFDEILEASDGIMVAR	3	50173	Acetyl:2H(3)@Any N-term	0	16	21183	21198	27	QE	0.957788	0.966224	0.83407	0.690025	pretrained
RFDEILEASDGIMVAR	2	50180	Acetyl:2H(3)@Any N-term	0	16	21198	21213	27	QE	0.934171	0.944964	0.787806	0.744096	pretrained
RFDEILEASDGIMVAR	3	50204	Acetyl:2H(3)@Any N-term	0	16	21213	21228	27	QE	0.95247	0.961902	0.823708	0.765963	pretrained
RDEPTGEVLSLVGKLEGTR	3	50261	Acetyl:2H(3)@Any N-term;Acetyl:2H(3)@K	0;14	19	21228	21246	27	QE	0.984314	0.986559	0.895504	0.82523	pretrained
RDEPTGEVLSLVGKLEGTR	2	50270	Acetyl:2H(3)@Any N-term;Acetyl:2H(3)@K	0;14	19	21246	21264	27	QE	0.891519	0.909007	0.726317	0.635314	pretrained
RDEPTGEVLSLVGKLEGTR	3	50290	Acetyl:2H(3)@Any N-term;Acetyl:2H(3)@K	0;14	19	21264	21282	27	QE	0.982623	0.985224	0.890426	0.765242	pretrained
RDEPTGEVLSLVGKLEGTR	2	50293	Acetyl:2H(3)@Any N-term;Acetyl:2H(3)@K	0;14	19	21282	21300	27	QE	0.94945	0.957441	0.813601	0.626825	pretrained
RGGKAVANYDSVEEGEKVVKTALDAFGR	3	50589	Acetyl:2H(3)@Any N-term;Acetyl:2H(3)@K;Acetyl:2H(3)@K;Acetyl:2H(3)@K	0;4;17;20	28	21300	21327	27	QE	0.930471	0.936448	0.771815	0.365505	pretrained
RFDEILEASDGIMVAR	3	50671	Acetyl:2H(3)@Any N-term	0	16	21327	21342	27	QE	0.961824	0.969442	0.842213	0.610586	pretrained
RQEKELLNLKKNVEGLKL	3	50711	Acetyl:2H(3)@Any N-term;Acetyl:2H(3)@K;Acetyl:2H(3)@K;Acetyl:2H(3)@K;Acetyl:2H(3)@K	0;4;10;11;17	18	21342	21359	27	QE	0.775926	0.809762	0.600808	0.166527	pretrained
RREDQMDGDGPRPR	4	50789	Acetyl:2H(3)@Any N-term;Oxidation@M	0;6	14	21359	21372	27	QE	0.960205	0.960676	0.820875	0.291087	pretrained
RKEKREETR	3	50818	Acetyl:2H(3)@Any N-term;Acetyl:2H(3)@K;Acetyl:2H(3)@K	0;2;4	9	21372	21380	27	QE	0.918062	0.930664	0.761539	0.609787	pretrained
RNAPPVRTENR	3	50829	Acetyl:2H(3)@Any N-term	0	11	21380	21390	27	QE	0.809554	0.846735	0.64287	0.535835	pretrained
RQMQDAAGRR	3	50835	Acetyl:2H(3)@Any N-term	0	10	21390	21399	27	QE	0.919431	0.930982	0.762094	0.615444	pretrained
RDRYSAGKR	3	50851	Acetyl:2H(3)@Any N-term;Acetyl:2H(3)@K	0;8	9	21399	21407	27	QE	0.834343	0.873366	0.676135	0.665872	pretrained
RGMDDDRGPR	3	50862	Acetyl:2H(3)@Any N-term	0	10	21407	21416	27	QE	0.779521	0.821585	0.613819	0.507465	pretrained
RAHCAICTDR	3	50864	Acetyl:2H(3)@Any N-term;Carbamidomethyl@C;Carbamidomethyl@C	0;4;7	10	21416	21425	27	QE	0.92486	0.941096	0.780406	0.647748	pretrained
RDRYSAGKR	3	50868	Acetyl:2H(3)@Any N-term;Acetyl:2H(3)@K	0;8	9	21425	21433	27	QE	0.623403	0.716587	0.508594	0.798754	pretrained
RQARPPDASAAR	3	50872	Acetyl:2H(3)@Any N-term	0	12	21433	21444	27	QE	0.895994	0.916438	0.737897	0.799154	pretrained
RAEAAEKR	2	50892	Acetyl:2H(3)@Any N-term;Acetyl:2H(3)@K	0;7	8	21444	21451	27	QE	0.926737	0.942852	0.783735	0.785167	pretrained
RVNTTQKR	2	50897	Acetyl:2H(3)@Any N-term;Acetyl:2H(3)@K	0;7	8	21451	21458	27	QE	0.862632	0.892694	0.702375	0.639026	pretrained
RKAEEDRVR	3	50898	Acetyl:2H(3)@Any N-term;Acetyl:2H(3)@K	0;2	9	21458	21466	27	QE	0.959859	0.964516	0.8299	0.864553	pretrained
RKASGAPAGAR	2	50911	Acetyl:2H(3)@Any N-term;Acetyl:2H(3)@K	0;2	11	21466	21476	27	QE	0.845543	0.867742	0.668859	0.484053	pretrained
RKPAMTTPTRR	3	50915	Acetyl:2H(3)@Any N-term;Acetyl:2H(3)@K;Oxidation@M	0;2;5	11	21476	21486	27	QE	0.904621	0.915301	0.736095	0.366135	pretrained
RQGKGDSPEAR	2	50918	Acetyl:2H(3)@Any N-term;Acetyl:2H(3)@K	0;4	11	21486	21496	27	QE	0.991353	0.992439	0.921663	0.792964	pretrained
RAEAAEKR	2	50919	Acetyl:2H(3)@Any N-term;Acetyl:2H(3)@K	0;7	8	21496	21503	27	QE	0.928027	0.940924	0.780082	0.463875	pretrained
RAGPEKRPKSSR	3	50922	Acetyl:2H(3)@Any N-term;Acetyl:2H(3)@K;Acetyl:2H(3)@K	0;6;9	12	21503	21514	27	QE	0.460116	0.536547	0.360543	0.248203	pretrained
RPSPQPSPR	2	50924	Acetyl:2H(3)@Any N-term	0	9	21514	21522	27	QE	0.905754	0.924989	0.751852	0.505132	pretrained
RANKDATAER	2	50927	Acetyl:2H(3)@Any N-term;Acetyl:2H(3)@K	0;4	10	21522	21531	27	QE	0.969419	0.971108	0.846598	0.215959	pretrained
RATKAAPR	2	50928	Acetyl:2H(3)@Any N-term;Acetyl:2H(3)@K	0;4	8	21531	21538	27	QE	0.867494	0.900017	0.712892	0.515052	pretrained
RTGAKPKR	2	50935	Acetyl:2H(3)@Any N-term;Acetyl:2H(3)@K;Acetyl:2H(3)@K	0;5;7	8	21538	21545	27	QE	0.897411	0.916269	0.737629	0.589491	pretrained
RTESEMSAR	2	50939	Acetyl:2H(3)@Any N-term	0	9	21545	21553	27	QE	0.948162	0.956771	0.812128	0.660191	pretrained
RRPTKSKGSKSSR	3	50946	Acetyl:2H(3)@Any N-term;Acetyl:2H(3)@K;Acetyl:2H(3)@K;Acetyl:2H(3)@K	0;5;7;10	13	21553	21565	27	QE	0.853818	0.868689	0.670074	0.379234	pretrained
RAKQKANQQR	2	50983	Acetyl:2H(3)@Any N-term;Acetyl:2H(3)@K;Acetyl:2H(3)@K	0;3;5	10	21565	21574	27	QE	0.890913	0.9164	0.737836	0.470013	pretrained
RAKQKANQQR	3	50991	Acetyl:2H(3)@Any N-term;Acetyl:2H(3)@K;Acetyl:2H(3)@K	0;3;5	10	21574	21583	27	QE	0.913231	0.928349	0.757544	0.726126	pretrained
RAPQGKPR	2	51014	Acetyl:2H(3)@Any N-term;Acetyl:2H(3)@K	0;6	8	21583	21590	27	QE	0.716823	0.802587	0.593087	0.5104	pretrained
RGPPPPPR	2	51016	Acetyl:2H(3)@Any N-term	0	8	21590	21597	27	QE	0.717416	0.815163	0.606705	0.76601	pretrained
RGPPPPPR	2	51048	Acetyl:2H(3)@Any N-term	0	8	21597	21604	27	QE	0.750195	0.836741	0.631084	0.629447	pretrained
RTPRPLTSAR	3	51057	Acetyl:2H(3)@Any N-term	0	10	21604	21613	27	QE	0.864525	0.8956	0.706507	0.730373	pretrained
RGPPPPPR	2	51075	Acetyl:2H(3)@Any N-term	0	8	21613	21620	27	QE	0.428877	0.610085	0.417729	0.443623	pretrained
RSQAGVSSGAPPGR	2	51102	Acetyl:2H(3)@Any N-term	0	14	21620	21633	27	QE	0.869638	0.884595	0.691131	0.43631	pretrained
RKSEAKQMPR	2	51125	Acetyl:2H(3)@Any N-term;Acetyl:2H(3)@K;Acetyl:2H(3)@K;Oxidation@M	0;2;6;8	10	21633	21642	27	QE	0.791912	0.827206	0.620142	0.464221	pretrained
RTPIGTDR	2	51182	Acetyl:2H(3)@Any N-term	0	8	21642	21649	27	QE	0.964758	0.971343	0.847226	0.752326	pretrained
RMFGGPGTASRPSSSR	3	51187	Acetyl:2H(3)@Any N-term;Oxidation@M	0;2	16	21649	21664	27	QE	0.88454	0.893727	0.703838	0.698472	pretrained
RGGGVGVGGGGTGVGGGDRDR	3	51236	Acetyl:2H(3)@Any N-term	0	21	21664	21684	27	QE	0.90791	0.919144	0.742236	0.305907	pretrained
RKDCDKEKR	2	51260	Acetyl:2H(3)@Any N-term;Acetyl:2H(3)@K;Carbamidomethyl@C;Acetyl:2H(3)@K;Acetyl:2H(3)@K	0;2;4;6;8	9	21684	21692	27	QE	0.954572	0.965177	0.831502	0.910557	pretrained
RETEEKMR	2	51273	Acetyl:2H(3)@Any N-term;Acetyl:2H(3)@K	0;6	8	21692	21699	27	QE	0.924818	0.941368	0.780917	0.758894	pretrained
RQPKYPR	2	51276	Acetyl:2H(3)@Any N-term;Acetyl:2H(3)@K	0;4	7	21699	21705	27	QE	0.805256	0.866364	0.667098	0.584783	pretrained
RREGKTDYYAR	3	51289	Acetyl:2H(3)@Any N-term;Acetyl:2H(3)@K	0;5	11	21705	21715	27	QE	0.719555	0.768428	0.557922	0.588462	pretrained
RSGHTFTVNPR	3	51298	Acetyl:2H(3)@Any N-term	0	11	21715	21725	27	QE	0.866529	0.894295	0.704645	0.695966	pretrained
RQNEDIEPTSSR	2	51300	Acetyl:2H(3)@Any N-term	0	12	21725	21736	27	QE	0.889011	0.906242	0.722123	0.359338	pretrained
RQEENDKLR	2	51367	Acetyl:2H(3)@Any N-term;Acetyl:2H(3)@K	0;7	9	21736	21744	27	QE	0.949084	0.958625	0.816232	0.789773	pretrained
RRLQEAELR	3	51391	Acetyl:2H(3)@Any N-term	0	9	21744	21752	27	QE	0.964667	0.9701	0.843929	0.627199	pretrained
RALAKER	2	51393	Acetyl:2H(3)@Any N-term;Acetyl:2H(3)@K	0;5	7	21752	21758	27	QE	0.956679	0.967035	0.836084	0.695652	pretrained
RDALKQR	2	51402	Acetyl:2H(3)@Any N-term;Acetyl:2H(3)@K	0;5	7	21758	21764	27	QE	0.952668	0.966268	0.834177	0.908696	pretrained
RKVVDCSR	2	51409	Acetyl:2H(3)@Any N-term;Acetyl:2H(3)@K;Carbamidomethyl@C	0;2;6	8	21764	21771	27	QE	0.829222	0.863688	0.663702	0.612206	pretrained
RIADQVR	2	51412	Acetyl:2H(3)@Any N-term	0	7	21771	21777	27	QE	0.770468	0.81034	0.601435	0.716522	pretrained
RPGEKTYTQR	2	51416	Acetyl:2H(3)@Any N-term;Acetyl:2H(3)@K	0;5	10	21777	21786	27	QE	0.809963	0.838687	0.633353	0.263578	pretrained
RKPAMTTPTRR	3	51436	Acetyl:2H(3)@Any N-term;Acetyl:2H(3)@K	0;2	11	21786	21796	27	QE	0.801166	0.829479	0.622725	0.313415	pretrained
RELKQAQR	2	51451	Acetyl:2H(3)@Any N-term;Acetyl:2H(3)@K	0;4	8	21796	21803	27	QE	0.941446	0.954063	0.806289	0.684729	pretrained
REEQKELQR	2	51455	Acetyl:2H(3)@Any N-term;Acetyl:2H(3)@K	0;5	9	21803	21811	27	QE	0.969186	0.975245	0.858053	0.899377	pretrained
RTGQEVAQAQES	2	51456	Acetyl:2H(3)@Any N-term	0	12	21811	21822	27	QE	0.966944	0.971187	0.846808	0.789782	pretrained
RELYGR	2	51467	Acetyl:2H(3)@Any N-term	0	6	21822	21827	27	QE	0.939441	0.961889	0.823676	0.881955	pretrained
REEQKELQR	2	51473	Acetyl:2H(3)@Any N-term;Acetyl:2H(3)@K	0;5	9	21827	21835	27	QE	0.903188	0.910939	0.729283	0.462243	pretrained
RRQQSEISAAVER	3	51477	Acetyl:2H(3)@Any N-term	0	13	21835	21847	27	QE	0.954505	0.962538	0.825194	0.440838	pretrained
RKELKR	2	51484	Acetyl:2H(3)@Any N-term;Acetyl:2H(3)@K;Acetyl:2H(3)@K	0;2;5	6	21847	21852	27	QE	0.842809	0.881467	0.686886	0.843609	pretrained
RTEKSPSLR	2	51514	Acetyl:2H(3)@Any N-term;Acetyl:2H(3)@K	0;4	9	21852	21860	27	QE	0.975061	0.979124	0.86969	0.97324	pretrained
RLQEANMR	2	51521	Acetyl:2H(3)@Any N-term	0	8	21860	21867	27	QE	0.924244	0.932051	0.763965	0.688013	pretrained
RVCTNPVDR	2	51532	Acetyl:2H(3)@Any N-term;Carbamidomethyl@C	0;3	9	21867	21875	27	QE	0.939681	0.944087	0.786107	0.691349	pretrained
RAPFAGR	2	51535	Acetyl:2H(3)@Any N-term	0	7	21875	21881	27	QE	0.915612	0.943066	0.784144	0.904783	pretrained
RKLEKQR	2	51553	Acetyl:2H(3)@Any N-term;Acetyl:2H(3)@K;Acetyl:2H(3)@K	0;2;5	7	21881	21887	27	QE	0.872861	0.90375	0.718393	0.840435	pretrained
RGQFIR	2	51565	Acetyl:2H(3)@Any N-term	0	6	21887	21892	27	QE	0.975753	0.981139	0.876159	0.796992	pretrained
RPVLGCR	2	51593	Acetyl:2H(3)@Any N-term;Carbamidomethyl@C	0;6	7	21892	21898	27	QE	0.973775	0.978311	0.867168	0.905217	pretrained
RASSVLAQR	2	51594	Acetyl:2H(3)@Any N-term	0	9	21898	21906	27	QE	0.936236	0.94238	0.782834	0.636364	pretrained
RQDLYSAR	2	51602	Acetyl:2H(3)@Any N-term	0	8	21906	21913	27	QE	0.91899	0.935315	0.769767	0.822113	pretrained
RMFGGPGTASRPSSSR	3	51686	Acetyl:2H(3)@Any N-term	0	16	21913	21928	27	QE	0.637081	0.692621	0.487088	0.156293	pretrained
RTMTNALR	2	51722	Acetyl:2H(3)@Any N-term	0	8	21928	21935	27	QE	0.962047	0.964992	0.831053	0.644499	pretrained
RLEEEVR	2	51727	Acetyl:2H(3)@Any N-term	0	7	21935	21941	27	QE	0.896125	0.920033	0.743676	0.838261	pretrained
RGGPNYQEGLR	2	51735	Acetyl:2H(3)@Any N-term	0	11	21941	21951	27	QE	0.937929	0.951093	0.800075	0.671576	pretrained
RNKDDSTKNKA	2	51739	Acetyl:2H(3)@Any N-term;Acetyl:2H(3)@K;Acetyl:2H(3)@K;Acetyl:2H(3)@K	0;3;8;10	11	21951	21961	27	QE	0.836335	0.870627	0.672573	0.743809	pretrained
RGEEGHDPKEPEQLR	3	51760	Acetyl:2H(3)@Any N-term;Acetyl:2H(3)@K	0;9	15	21961	21975	27	QE	0.803645	0.829468	0.622712	0.69689	pretrained
RNEPIKYQR	2	51763	Acetyl:2H(3)@Any N-term;Acetyl:2H(3)@K	0;6	9	21975	21983	27	QE	0.969049	0.975725	0.859442	0.829362	pretrained
RAVKFQR	2	51814	Acetyl:2H(3)@Any N-term;Acetyl:2H(3)@K	0;4	7	21983	21989	27	QE	0.930422	0.949566	0.796951	0.884348	pretrained
RKSEAKQMPR	2	51818	Acetyl:2H(3)@Any N-term;Acetyl:2H(3)@K;Acetyl:2H(3)@K	0;2;6	10	21989	21998	27	QE	0.547372	0.618624	0.424619	0.632304	pretrained
RGGVVGTLR	2	51842	Acetyl:2H(3)@Any N-term	0	9	21998	22006	27	QE	0.97253	0.976398	0.861412	0.857038	pretrained
RPKEEDPATGTGDPPR	2	51847	Acetyl:2H(3)@Any N-term;Acetyl:2H(3)@K	0;3	16	22006	22021	27	QE	0.958238	0.95989	0.819081	0.76549	pretrained
RPKEEDPATGTGDPPR	3	51851	Acetyl:2H(3)@Any N-term;Acetyl:2H(3)@K	0;3	16	22021	22036	27	QE	0.938271	0.941983	0.78208	0.554876	pretrained
RAAEEAEEARVQAER	3	51937	Acetyl:2H(3)@Any N-term	0	15	22036	22050	27	QE	0.928373	0.940762	0.779777	0.556357	pretrained
RQAVDVSPLRR	3	51973	Acetyl:2H(3)@Any N-term	0	11	22050	22060	27	QE	0.950916	0.957112	0.812876	0.462007	pretrained
RDLEGSDIDTR	2	52101	Acetyl:2H(3)@Any N-term	0	11	22060	22070	27	QE	0.989268	0.990195	0.910779	0.822983	pretrained
RVPPPALSR	2	52133	Acetyl:2H(3)@Any N-term	0	9	22070	22078	27	QE	0.916365	0.934965	0.769139	0.774194	pretrained
RLVSDGNINSDR	2	52138	Acetyl:2H(3)@Any N-term	0	12	22078	22089	27	QE	0.958425	0.96431	0.829403	0.77618	pretrained
RKEDEVEEWQHR	3	52210	Acetyl:2H(3)@Any N-term;Acetyl:2H(3)@K	0;2	12	22089	22100	27	QE	0.8973	0.920685	0.744738	0.985342	pretrained
RLVSDGNINSDR	2	52222	Acetyl:2H(3)@Any N-term	0	12	22100	22111	27	QE	0.938988	0.943416	0.784816	0.52537	pretrained
RPLEEDFRR	3	52244	Acetyl:2H(3)@Any N-term	0	9	22111	22119	27	QE	0.865549	0.877824	0.68201	0.619501	pretrained
RDPEEDGMMKR	2	52245	Acetyl:2H(3)@Any N-term;Acetyl:2H(3)@K	0;10	11	22119	22129	27	QE	0.804952	0.834518	0.628507	0.462195	pretrained
RDVYLSPR	2	52250	Acetyl:2H(3)@Any N-term	0	8	22129	22136	27	QE	0.923297	0.946738	0.791286	0.775315	pretrained
RLQAQRNELNAKVR	3	52263	Acetyl:2H(3)@Any N-term;Acetyl:2H(3)@K	0;12	14	22136	22149	27	QE	0.759142	0.796646	0.586789	0.243789	pretrained
RGTEHSGSTVPSILNR	3	52274	Acetyl:2H(3)@Any N-term	0	16	22149	22164	27	QE	0.902487	0.909489	0.727054	0.65746	pretrained
RQEQTLRDATMEVQR	3	52290	Acetyl:2H(3)@Any N-term;Oxidation@M	0;11	15	22164	22178	27	QE	0.929022	0.939605	0.777615	0.485304	pretrained
RTEEGPTLSYGR	2	52305	Acetyl:2H(3)@Any N-term	0	12	22178	22189	27	QE	0.926071	0.945197	0.78826	0.788865	pretrained
RADDFPVR	2	52327	Acetyl:2H(3)@Any N-term	0	8	22189	22196	27	QE	0.799916	0.833684	0.627545	0.393268	pretrained
RLDQLER	2	52330	Acetyl:2H(3)@Any N-term	0	7	22196	22202	27	QE	0.977522	0.983103	0.882802	0.9	pretrained
REASSEELKAAYRR	3	52334	Acetyl:2H(3)@Any N-term;Acetyl:2H(3)@K	0;9	14	22202	22215	27	QE	0.786297	0.818408	0.610286	0.14962	pretrained
RDEFLGR	2	52352	Acetyl:2H(3)@Any N-term	0	7	22215	22221	27	QE	0.91668	0.935287	0.769717	0.877826	pretrained
RLEEAALR	2	52384	Acetyl:2H(3)@Any N-term	0	8	22221	22228	27	QE	0.969335	0.976637	0.862118	0.775862	pretrained
RLCDLER	2	52407	Acetyl:2H(3)@Any N-term;Carbamidomethyl@C	0;3	7	22228	22234	27	QE	0.909893	0.929504	0.759529	0.839565	pretrained
RLDTDLAR	2	52414	Acetyl:2H(3)@Any N-term	0	8	22234	22241	27	QE	0.950578	0.961823	0.823523	0.866721	pretrained
RLKEEIERR	3	52434	Acetyl:2H(3)@Any N-term;Acetyl:2H(3)@K	0;3	9	22241	22249	27	QE	0.847542	0.886106	0.6932	0.626283	pretrained
RADLNQGIGEPQSPSR	2	52482	Acetyl:2H(3)@Any N-term	0	16	22249	22264	27	QE	0.970044	0.973787	0.853915	0.448652	pretrained
RADLNQGIGEPQSPSR	3	52488	Acetyl:2H(3)@Any N-term	0	16	22264	22279	27	QE	0.708915	0.754268	0.544016	0.655488	pretrained
RQQEELLAEENQR	3	52496	Acetyl:2H(3)@Any N-term	0	13	22279	22291	27	QE	0.992903	0.993994	0.930193	0.907241	pretrained
RQQEELLAEENQR	2	52505	Acetyl:2H(3)@Any N-term	0	13	22291	22303	27	QE	0.89434	0.931639	0.763241	0.860725	pretrained
RGDDSFGDKYR	2	52529	Acetyl:2H(3)@Any N-term;Acetyl:2H(3)@K	0;9	11	22303	22313	27	QE	0.895368	0.918668	0.741467	0.720263	pretrained
RLAKKTAEEPAASGR	3	52532	Acetyl:2H(3)@Any N-term;Acetyl:2H(3)@K;Acetyl:2H(3)@K	0;4;5	15	22313	22327	27	QE	0.933251	0.937531	0.773789	0.633288	pretrained
RQEQTLRDATMEVQR	3	52533	Acetyl:2H(3)@Any N-term	0	15	22327	22341	27	QE	0.948983	0.958798	0.816619	0.703794	pretrained
RLAKKTAEEPAASGR	2	52541	Acetyl:2H(3)@Any N-term;Acetyl:2H(3)@K;Acetyl:2H(3)@K	0;4;5	15	22341	22355	27	QE	0.939247	0.943143	0.784291	0.759774	pretrained
RQEQTLRDATMEVQR	3	52544	Acetyl:2H(3)@Any N-term;Oxidation@M	0;11	15	22355	22369	27	QE	0.967254	0.966519	0.8348	0.42177	pretrained
RKTVEEIKR	3	52559	Acetyl:2H(3)@Any N-term;Acetyl:2H(3)@K;Acetyl:2H(3)@K	0;2;8	9	22369	22377	27	QE	0.944413	0.957216	0.813106	0.863087	pretrained
RGSLPDQKDLR	2	52578	Acetyl:2H(3)@Any N-term;Acetyl:2H(3)@K	0;8	11	22377	22387	27	QE	0.978213	0.979184	0.869878	0.232458	pretrained
RVLLAQQEAR	2	52609	Acetyl:2H(3)@Any N-term	0	10	22387	22396	27	QE	0.939947	0.952608	0.80322	0.878121	pretrained
REAALKEDFRR	3	52660	Acetyl:2H(3)@Any N-term;Acetyl:2H(3)@K	0;6	11	22396	22406	27	QE	0.956818	0.963018	0.826326	0.483302	pretrained
RAQEAEEAGAALRTAR	3	52673	Acetyl:2H(3)@Any N-term	0	16	22406	22421	27	QE	0.427091	0.529649	0.355352	0.0631009	pretrained
RKTTPKEPTEKKMAR	3	52690	Acetyl:2H(3)@Any N-term;Acetyl:2H(3)@K;Acetyl:2H(3)@K;Acetyl:2H(3)@K;Acetyl:2H(3)@K	0;2;6;11;12	15	22421	22435	27	QE	0.907602	0.92097	0.745204	0.882673	pretrained
RLAAAEETAVSPR	2	52707	Acetyl:2H(3)@Any N-term	0	13	22435	22447	27	QE	0.845536	0.877648	0.681777	0.782132	pretrained
RLTEQKGEQQIQKAR	3	52727	Acetyl:2H(3)@Any N-term;Acetyl:2H(3)@K;Acetyl:2H(3)@K	0;6;13	15	22447	22461	27	QE	0.884287	0.90968	0.727347	0.635338	pretrained
RLTEQKGEQQIQKAR	2	52729	Acetyl:2H(3)@Any N-term;Acetyl:2H(3)@K;Acetyl:2H(3)@K	0;6;13	15	22461	22475	27	QE	0.816522	0.849545	0.646247	0.415482	pretrained
RADDNATIRVTNLSEDTR	3	52735	Acetyl:2H(3)@Any N-term	0	18	22475	22492	27	QE	0.985381	0.986117	0.893798	0.640989	pretrained
RLFEQNVQR	2	52769	Acetyl:2H(3)@Any N-term	0	9	22492	22500	27	QE	0.942557	0.948232	0.794261	0.833761	pretrained
RGGPYKTEPATDLGR	2	52780	Acetyl:2H(3)@Any N-term;Acetyl:2H(3)@K	0;6	15	22500	22514	27	QE	0.98083	0.982469	0.880619	0.934416	pretrained
RDPFRDSPLSSR	3	52814	Acetyl:2H(3)@Any N-term	0	12	22514	22525	27	QE	0.868532	0.890804	0.699715	0.945455	pretrained
RHWGGNVLGPKSVAR	3	52852	Acetyl:2H(3)@Any N-term;Acetyl:2H(3)@K	0;11	15	22525	22539	27	QE	0.766222	0.802142	0.592613	0.732468	pretrained
RELFEER	2	52891	Acetyl:2H(3)@Any N-term	0	7	22539	22545	27	QE	0.942752	0.95641	0.81134	0.908261	pretrained
RPLHSAQAVDVASASNFR	3	52913	Acetyl:2H(3)@Any N-term	0	18	22545	22562	27	QE	0.927828	0.942468	0.783002	0.781158	pretrained
RTPAEIREEFER	3	52998	Acetyl:2H(3)@Any N-term	0	12	22562	22573	27	QE	0.913263	0.927889	0.756757	0.757646	pretrained
RLDLPIERQPR	3	53024	Acetyl:2H(3)@Any N-term	0	11	22573	22583	27	QE	0.90502	0.922001	0.746894	0.819137	pretrained
REKTNEELQEELR	2	53063	Acetyl:2H(3)@Any N-term;Acetyl:2H(3)@K	0;3	13	22583	22595	27	QE	0.954216	0.959134	0.817372	0.653604	pretrained
RENILVMR	2	53096	Acetyl:2H(3)@Any N-term	0	8	22595	22602	27	QE	0.967719	0.974849	0.856917	0.851943	pretrained
RGIPGLPDGR	2	53143	Acetyl:2H(3)@Any N-term	0	10	22602	22611	27	QE	0.986514	0.987609	0.899677	0.792278	pretrained
RRVGLKAPGIIPR	3	53145	Acetyl:2H(3)@Any N-term;Acetyl:2H(3)@K	0;6	13	22611	22623	27	QE	0.706716	0.732737	0.523515	0.245386	pretrained
RELAKMKQEPVKPEEGR	3	53163	Acetyl:2H(3)@Any N-term;Acetyl:2H(3)@K;Oxidation@M;Acetyl:2H(3)@K;Acetyl:2H(3)@K	0;5;6;7;12	17	22623	22639	27	QE	0.966161	0.968819	0.840604	0.647413	pretrained
RGPPGLEDTTSKKKQKDR	3	53176	Acetyl:2H(3)@Any N-term;Acetyl:2H(3)@K;Acetyl:2H(3)@K;Acetyl:2H(3)@K;Acetyl:2H(3)@K	0;12;13;14;16	18	22639	22656	27	QE	0.963571	0.971013	0.846343	0.716074	pretrained
RGIPGLPDGR	2	53180	Acetyl:2H(3)@Any N-term	0	10	22656	22665	27	QE	0.986353	0.987781	0.900377	0.772973	pretrained
RYQKSTELLIR	3	53183	Acetyl:2H(3)@Any N-term;Acetyl:2H(3)@K	0;4	11	22665	22675	27	QE	0.966198	0.973704	0.853682	0.858349	pretrained
RYQKSTELLIR	2	53186	Acetyl:2H(3)@Any N-term;Acetyl:2H(3)@K	0;4	11	22675	22685	27	QE	0.966964	0.964899	0.830826	0.523358	pretrained
RLNDFASTVR	2	53206	Acetyl:2H(3)@Any N-term	0	10	22685	22694	27	QE	0.972986	0.977921	0.865975	0.840541	pretrained
RLPENLYNDR	2	53222	Acetyl:2H(3)@Any N-term	0	10	22694	22703	27	QE	0.959876	0.967923	0.838319	0.809009	pretrained
RGLGLTLR	2	53279	Acetyl:2H(3)@Any N-term	0	8	22703	22710	27	QE	0.959915	0.964857	0.830725	0.509579	pretrained
RLSESQLSFR	2	53326	Acetyl:2H(3)@Any N-term	0	10	22710	22719	27	QE	0.907256	0.904567	0.719612	0.475418	pretrained
RLQTILR	2	53329	Acetyl:2H(3)@Any N-term	0	7	22719	22725	27	QE	0.970059	0.974975	0.857277	0.678261	pretrained
RDDKERPPFIPEGVVARR	4	53374	Acetyl:2H(3)@Any N-term;Acetyl:2H(3)@K	0;4	18	22725	22742	27	QE	0.908469	0.92053	0.744485	0.365996	pretrained
RRQQQEEDEQETAALLEEAR	3	53407	Acetyl:2H(3)@Any N-term	0	20	22742	22761	27	QE	0.943737	0.951317	0.800537	0.769542	pretrained
RQQEGFKGTFPDAR	2	53439	Acetyl:2H(3)@Any N-term;Acetyl:2H(3)@K	0;7	14	22761	22774	27	QE	0.965584	0.967443	0.837108	0.148852	pretrained
REVLQNQLGIRPPTR	3	53538	Acetyl:2H(3)@Any N-term	0	15	22774	22788	27	QE	0.88973	0.910925	0.72926	0.721463	pretrained
RLKAQMIEKR	2	53547	Acetyl:2H(3)@Any N-term;Acetyl:2H(3)@K;Acetyl:2H(3)@K	0;3;9	10	22788	22797	27	QE	0.955566	0.959083	0.817258	0.813127	pretrained
RLKAQMIEKR	3	53552	Acetyl:2H(3)@Any N-term;Acetyl:2H(3)@K;Acetyl:2H(3)@K	0;3;9	10	22797	22806	27	QE	0.912328	0.933293	0.766156	0.936293	pretrained
RSECNMCNTPKYAKLEER	3	53560	Acetyl:2H(3)@Any N-term;Carbamidomethyl@C;Carbamidomethyl@C;Acetyl:2H(3)@K;Acetyl:2H(3)@K	0;4;7;11;14	18	22806	22823	27	QE	0.876696	0.89836	0.710481	0.735409	pretrained
RIEQDMLEKR	2	53580	Acetyl:2H(3)@Any N-term;Acetyl:2H(3)@K	0;9	10	22823	22832	27	QE	0.921917	0.939144	0.776759	0.674646	pretrained
RIATGSFLKR	2	53602	Acetyl:2H(3)@Any N-term;Acetyl:2H(3)@K	0;9	10	22832	22841	27	QE	0.956761	0.962235	0.824483	0.553024	pretrained
RDEKNKLQKEKALR	3	53768	Acetyl:2H(3)@Any N-term;Acetyl:2H(3)@K;Acetyl:2H(3)@K;Acetyl:2H(3)@K;Acetyl:2H(3)@K	0;4;6;9;11	14	22841	22854	27	QE	0.791738	0.834794	0.628827	0.711176	pretrained
RDEKNKLQKEKALR	2	53774	Acetyl:2H(3)@Any N-term;Acetyl:2H(3)@K;Acetyl:2H(3)@K;Acetyl:2H(3)@K;Acetyl:2H(3)@K	0;4;6;9;11	14	22854	22867	27	QE	0.776021	0.792465	0.582405	0.0897294	pretrained
RYQKSTELLIR	2	53838	Acetyl:2H(3)@Any N-term;Acetyl:2H(3)@K	0;4	11	22867	22877	27	QE	0.967674	0.971116	0.846619	0.636116	pretrained
RYQKSTELLIR	3	53840	Acetyl:2H(3)@Any N-term;Acetyl:2H(3)@K	0;4	11	22877	22887	27	QE	0.943047	0.955786	0.809985	0.874578	pretrained
RYQKSTELLIR	2	53887	Acetyl:2H(3)@Any N-term;Acetyl:2H(3)@K	0;4	11	22887	22897	27	QE	0.967876	0.97206	0.849158	0.72242	pretrained
RYQKSTELLIR	2	53987	Acetyl:2H(3)@Any N-term;Acetyl:2H(3)@K	0;4	11	22897	22907	27	QE	0.984519	0.986935	0.89698	0.671013	pretrained
RKSNCVKEVEKLQEKR	3	54015	Acetyl:2H(3)@Any N-term;Acetyl:2H(3)@K;Carbamidomethyl@C;Acetyl:2H(3)@K;Acetyl:2H(3)@K;Acetyl:2H(3)@K	0;2;5;7;11;15	16	22907	22922	27	QE	0.928966	0.945176	0.788221	0.590803	pretrained
RAAAKCLDAVVSTR	2	54046	Acetyl:2H(3)@Any N-term;Acetyl:2H(3)@K;Carbamidomethyl@C	0;5;6	14	22922	22935	27	QE	0.95267	0.951965	0.801881	0.613891	pretrained
RNPPGGKSSLVLG	2	54108	Acetyl:2H(3)@Any N-term;Acetyl:2H(3)@K	0;7	13	22935	22947	27	QE	0.698473	0.757441	0.547102	0.62424	pretrained
RLMKELEEIR	2	54109	Acetyl:2H(3)@Any N-term;Oxidation@M;Acetyl:2H(3)@K	0;3;4	10	22947	22956	27	QE	0.97996	0.981982	0.878968	0.660232	pretrained
RNPPGGKSSLVLG	2	54155	Acetyl:2H(3)@Any N-term;Acetyl:2H(3)@K	0;7	13	22956	22968	27	QE	0.675903	0.737371	0.527866	0.800098	pretrained
RELAKMKQEPVKPEEGR	3	54185	Acetyl:2H(3)@Any N-term;Acetyl:2H(3)@K;Acetyl:2H(3)@K;Acetyl:2H(3)@K	0;5;7;12	17	22968	22984	27	QE	0.967262	0.970703	0.845519	0.693429	pretrained
RKELEEVSPETPVVPATTQR	3	54201	Acetyl:2H(3)@Any N-term;Acetyl:2H(3)@K	0;2	20	22984	23003	27	QE	0.951965	0.955192	0.808702	0.728858	pretrained
RKELEEVSPETPVVPATTQR	2	54202	Acetyl:2H(3)@Any N-term;Acetyl:2H(3)@K	0;2	20	23003	23022	27	QE	0.863689	0.881876	0.687439	0.779371	pretrained
RIEFAEQINKMEARPR	3	54294	Acetyl:2H(3)@Any N-term;Acetyl:2H(3)@K	0;10	16	23022	23037	27	QE	0.651928	0.733142	0.523894	0.410725	pretrained
RIEKGALTLSSPEVR	3	54330	Acetyl:2H(3)@Any N-term;Acetyl:2H(3)@K	0;4	15	23037	23051	27	QE	0.911378	0.92498	0.751837	0.787902	pretrained
RGLKYELISETGGSHDKR	3	54347	Acetyl:2H(3)@Any N-term;Acetyl:2H(3)@K;Acetyl:2H(3)@K	0;4;17	18	23051	23068	27	QE	0.93896	0.947322	0.792444	0.553098	pretrained
RELAELVKR	2	54425	Acetyl:2H(3)@Any N-term;Acetyl:2H(3)@K	0;8	9	23068	23076	27	QE	0.881155	0.903352	0.717802	0.46206	pretrained
RKTPVIVTLKENER	3	54426	Acetyl:2H(3)@Any N-term;Acetyl:2H(3)@K;Acetyl:2H(3)@K	0;2;10	14	23076	23089	27	QE	0.971581	0.975784	0.859612	0.599078	pretrained
RKTPVIVTLKENER	2	54432	Acetyl:2H(3)@Any N-term;Acetyl:2H(3)@K;Acetyl:2H(3)@K	0;2;10	14	23089	23102	27	QE	0.917284	0.931163	0.76241	0.670537	pretrained
RKTPVIVTLKENER	2	54443	Acetyl:2H(3)@Any N-term;Acetyl:2H(3)@K;Acetyl:2H(3)@K	0;2;10	14	23102	23115	27	QE	0.866532	0.88666	0.69396	0.52732	pretrained
RKQYPISLVLAPTR	3	54748	Acetyl:2H(3)@Any N-term;Acetyl:2H(3)@K	0;2	14	23115	23128	27	QE	0.918851	0.933091	0.765799	0.673226	pretrained
RVPFSLLR	2	54753	Acetyl:2H(3)@Any N-term	0	8	23128	23135	27	QE	0.939388	0.953765	0.805658	0.738643	pretrained
RACGCAAAPDVKELLSR	2	54803	Acetyl:2H(3)@Any N-term;Carbamidomethyl@C;Carbamidomethyl@C;Acetyl:2H(3)@K	0;3;5;12	17	23135	23151	27	QE	0.852955	0.864006	0.664105	0.598535	pretrained
RACGCAAAPDVKELLSR	3	54804	Acetyl:2H(3)@Any N-term;Carbamidomethyl@C;Carbamidomethyl@C;Acetyl:2H(3)@K	0;3;5;12	17	23151	23167	27	QE	0.961383	0.9672	0.836497	0.667033	pretrained
RLLPSLIGR	2	54821	Acetyl:2H(3)@Any N-term	0	9	23167	23175	27	QE	0.911671	0.926211	0.753908	0.508431	pretrained
RMEIQVKDLSQQIR	3	54889	Acetyl:2H(3)@Any N-term;Acetyl:2H(3)@K	0;7	14	23175	23188	27	QE	0.970338	0.975979	0.860182	0.838385	pretrained
RMEIQVKDLSQQIR	2	54900	Acetyl:2H(3)@Any N-term;Acetyl:2H(3)@K	0;7	14	23188	23201	27	QE	0.96487	0.967501	0.837253	0.643772	pretrained
RKKEEKAADRLEQELLR	3	55073	Acetyl:2H(3)@Any N-term;Acetyl:2H(3)@K;Acetyl:2H(3)@K;Acetyl:2H(3)@K	0;2;3;6	17	23201	23217	27	QE	0.716318	0.734294	0.524974	0.438324	pretrained
RKDAKSVKIKKNKDNVKFKVR	3	55102	Acetyl:2H(3)@Any N-term;Acetyl:2H(3)@K;Acetyl:2H(3)@K;Acetyl:2H(3)@K;Acetyl:2H(3)@K;Acetyl:2H(3)@K;Acetyl:2H(3)@K;Acetyl:2H(3)@K;Acetyl:2H(3)@K	0;2;5;8;10;11;13;17;19	21	23217	23237	27	QE	0.696493	0.764285	0.553816	0.378446	pretrained
RAEAEKQLQQAQAAGAEQEVEKFTKR	3	55323	Acetyl:2H(3)@Any N-term;Acetyl:2H(3)@K;Acetyl:2H(3)@K;Acetyl:2H(3)@K	0;6;22;25	26	23237	23262	27	QE	0.772243	0.819971	0.612021	0.315157	pretrained
RAEAEKQLQQAQAAGAEQEVEKFTKR	4	55328	Acetyl:2H(3)@Any N-term;Acetyl:2H(3)@K;Acetyl:2H(3)@K;Acetyl:2H(3)@K	0;6;22;25	26	23262	23287	27	QE	0.787634	0.828952	0.622124	0.235782	pretrained
RAEAEKQLQQAQAAGAEQEVEKFTKR	3	55362	Acetyl:2H(3)@Any N-term;Acetyl:2H(3)@K;Acetyl:2H(3)@K;Acetyl:2H(3)@K	0;6;22;25	26	23287	23312	27	QE	0.777378	0.823862	0.61637	0.376568	pretrained
RVNQAIWLLCTGAR	2	55363	Acetyl:2H(3)@Any N-term;Carbamidomethyl@C	0;10	14	23312	23325	27	QE	0.935311	0.950327	0.798503	0.595108	pretrained
RVNQAIWLLCTGAR	3	55373	Acetyl:2H(3)@Any N-term;Carbamidomethyl@C	0;10	14	23325	23338	27	QE	0.98333	0.986091	0.893697	0.800435	pretrained
RSQPKAPPVDDAEVDELVLQTKR	3	55431	Acetyl:2H(3)@Any N-term;Acetyl:2H(3)@K;Acetyl:2H(3)@K	0;5;22	23	23338	23360	27	QE	0.944277	0.950795	0.799461	0.482072	pretrained
RSDEPAKTKKGLSSILDAAR	3	55493	Acetyl:2H(3)@Any N-term;Acetyl:2H(3)@K;Acetyl:2H(3)@K;Acetyl:2H(3)@K	0;7;9;10	20	23360	23379	27	QE	0.95574	0.959479	0.81815	0.682953	pretrained
RKGTDVNVFNTILTTR	3	55509	Acetyl:2H(3)@Any N-term;Acetyl:2H(3)@K	0;2	16	23379	23394	27	QE	0.913316	0.928916	0.758517	0.817727	pretrained
RKGTDVNVFNTILTTR	2	55510	Acetyl:2H(3)@Any N-term;Acetyl:2H(3)@K	0;2	16	23394	23409	27	QE	0.899429	0.912021	0.730958	0.381467	pretrained
RYDDPEVQKDIKNVPFKIVR	3	55565	Acetyl:2H(3)@Any N-term;Acetyl:2H(3)@K;Acetyl:2H(3)@K;Acetyl:2H(3)@K	0;9;12;17	20	23409	23428	27	QE	0.975107	0.977219	0.863853	0.462228	pretrained
RSLEQNIQLPAALLSR	3	55614	Acetyl:2H(3)@Any N-term	0	16	23428	23443	27	QE	0.989263	0.990151	0.910577	0.829786	pretrained
RSLEQNIQLPAALLSR	2	55615	Acetyl:2H(3)@Any N-term	0	16	23443	23458	27	QE	0.937287	0.944486	0.786878	0.386163	pretrained
REILGTCKMLGQMTDQVADLR	3	55618	Acetyl:2H(3)@Any N-term;Carbamidomethyl@C;Acetyl:2H(3)@K;Oxidation@M	0;7;8;9	21	23458	23478	27	QE	0.804632	0.831341	0.624852	0.558908	pretrained
RGDVLAAWSGIRPLVTDPKSADTQSISR	3	55770	Acetyl:2H(3)@Any N-term;Acetyl:2H(3)@K	0;19	28	23478	23505	27	QE	0.994927	0.994963	0.936074	0.760677	pretrained
RGDVLAAWSGIRPLVTDPKSADTQSISR	3	55771	Acetyl:2H(3)@Any N-term;Acetyl:2H(3)@K	0;19	28	23505	23532	27	QE	0.994112	0.99399	0.93017	0.720703	pretrained
RLLSRPQDVLEGVVLSPSLEAR	3	55795	Acetyl:2H(3)@Any N-term	0	22	23532	23553	27	QE	0.919916	0.930486	0.76123	0.677432	pretrained
RPLYKNIVLSGGSTMFR	3	55894	Acetyl:2H(3)@Any N-term;Acetyl:2H(3)@K	0;5	17	23553	23569	27	QE	0.91773	0.927148	0.755494	0.677518	pretrained
RLQGQLEQGDDTAAERLEKVYEELR	3	55913	Acetyl:2H(3)@Any N-term;Acetyl:2H(3)@K	0;19	25	23569	23593	27	QE	0.916687	0.923155	0.748797	0.362215	pretrained
RIGIFGQDEDVTSKAFTGREFDELNPSAQR	3	55922	Acetyl:2H(3)@Any N-term;Acetyl:2H(3)@K	0;14	30	23593	23622	27	QE	0.31206	0.349499	0.227296	0.626475	pretrained
RFVNVVPTFGKKKGPNANS	3	55961	Acetyl:2H(3)@Any N-term;Acetyl:2H(3)@K;Acetyl:2H(3)@K;Acetyl:2H(3)@K	0;11;12;13	19	23622	23640	27	QE	0.98582	0.986683	0.895988	0.137067	pretrained
RFVNVVPTFGKKKGPNANS	2	55970	Acetyl:2H(3)@Any N-term;Acetyl:2H(3)@K;Acetyl:2H(3)@K;Acetyl:2H(3)@K	0;11;12;13	19	23640	23658	27	QE	0.952987	0.957223	0.813121	0.526851	pretrained
RFVNVVPTFGKKKGPNANS	3	56009	Acetyl:2H(3)@Any N-term;Acetyl:2H(3)@K;Acetyl:2H(3)@K;Acetyl:2H(3)@K	0;11;12;13	19	23658	23676	27	QE	0.983487	0.984474	0.887671	0.293556	pretrained
RVKLQGILADLR	3	56011	Acetyl:2H(3)@Any N-term;Acetyl:2H(3)@K	0;3	12	23676	23687	27	QE	0.94162	0.95052	0.798898	0.584778	pretrained
RAEDGSVIDYELIDQDARDLYDAGVKR	3	56116	Acetyl:2H(3)@Any N-term;Acetyl:2H(3)@K	0;26	27	23687	23713	27	QE	0.968649	0.97119	0.846815	0.7665	pretrained
RSSDPLGDTASNLGSAVDELMR	3	56315	Acetyl:2H(3)@Any N-term	0	22	23713	23734	27	QE	0.975885	0.9793	0.870243	0.739192	pretrained
RQTLLQKMSSF	2	56466	Acetyl:2H(3)@Any N-term;Acetyl:2H(3)@K	0;7	11	23734	23744	27	QE	0.783221	0.829722	0.623002	0.515854	pretrained
RLLEDGEDFNLGDALDSSNSMQTIQKTTTR	3	56492	Acetyl:2H(3)@Any N-term;Oxidation@M;Acetyl:2H(3)@K	0;21;26	30	23744	23773	27	QE	0.839285	0.85302	0.650463	0.381963	pretrained
RVLQALEGLKMVEKDQDGGR	4	56497	Acetyl:2H(3)@Any N-term;Acetyl:2H(3)@K;Oxidation@M;Acetyl:2H(3)@K	0;10;11;14	20	23773	23792	27	QE	0.957171	0.961373	0.82248	0.914805	pretrained
RVLQALEGLKMVEKDQDGGR	3	56500	Acetyl:2H(3)@Any N-term;Acetyl:2H(3)@K;Oxidation@M;Acetyl:2H(3)@K	0;10;11;14	20	23792	23811	27	QE	0.960097	0.966664	0.83516	0.496528	pretrained
RQVEDLQATFSSIHSFQDLSSSILAQSR	3	56568	Acetyl:2H(3)@Any N-term	0	28	23811	23838	27	QE	0.898449	0.918609	0.741372	0.62171	pretrained
REELLKQLKAVEDAIAR	3	56919	Acetyl:2H(3)@Any N-term;Acetyl:2H(3)@K;Acetyl:2H(3)@K	0;6;9	17	23838	23854	27	QE	0.923815	0.936053	0.771099	0.706914	pretrained
REELLKQLKAVEDAIAR	2	56926	Acetyl:2H(3)@Any N-term;Acetyl:2H(3)@K;Acetyl:2H(3)@K	0;6;9	17	23854	23870	27	QE	0.900287	0.903851	0.718544	0.428571	pretrained
RGMDDDRGPR	3	57093	Acetyl:2H(3)@Any N-term;Oxidation@M	0;3	10	23870	23879	27	QE	0.939532	0.94151	0.781186	0.546589	pretrained
RGMDDDRGPR	3	57094	Acetyl:2H(3)@Any N-term	0	10	23879	23888	27	QE	0.813082	0.840719	0.635734	0.476319	pretrained
RTEASRNAADKER	3	57095	Acetyl:2H(3)@Any N-term;Acetyl:2H(3)@K	0;11	13	23888	23900	27	QE	0.77962	0.815483	0.607057	0.683728	pretrained
RGMDDDRGPR	3	57109	Acetyl:2H(3)@Any N-term	0	10	23900	23909	27	QE	0.802709	0.818894	0.610825	0.352896	pretrained
RGMDDDRGPR	3	57114	Acetyl:2H(3)@Any N-term;Oxidation@M	0;3	10	23909	23918	27	QE	0.941148	0.942924	0.783873	0.55251	pretrained
RKPAMTTPTRR	3	57134	Acetyl:2H(3)@Any N-term;Acetyl:2H(3)@K;Oxidation@M	0;2;5	11	23918	23928	27	QE	0.892742	0.905309	0.720721	0.557974	pretrained
REQHLHKQKQKR	4	57136	Acetyl:2H(3)@Any N-term;Acetyl:2H(3)@K;Acetyl:2H(3)@K;Acetyl:2H(3)@K	0;7;9;11	12	23928	23939	27	QE	0.642588	0.700913	0.494448	0.3642	pretrained
RGGEASGTSDGGPPPSR	2	57146	Acetyl:2H(3)@Any N-term	0	17	23939	23955	27	QE	0.989371	0.989866	0.90929	0.544918	pretrained
RANKDATAER	2	57147	Acetyl:2H(3)@Any N-term;Acetyl:2H(3)@K	0;4	10	23955	23964	27	QE	0.97932	0.980776	0.874968	0.623552	pretrained
REAEADKPRR	3	57161	Acetyl:2H(3)@Any N-term;Acetyl:2H(3)@K	0;7	10	23964	23973	27	QE	0.868174	0.883019	0.688986	0.380695	pretrained
RRPTKSKGSKSSR	3	57162	Acetyl:2H(3)@Any N-term;Acetyl:2H(3)@K;Acetyl:2H(3)@K;Acetyl:2H(3)@K	0;5;7;10	13	23973	23985	27	QE	0.869159	0.881549	0.686998	0.293639	pretrained
RGGEASGTSDGGPPPSR	3	57165	Acetyl:2H(3)@Any N-term	0	17	23985	24001	27	QE	0.88612	0.903492	0.71801	0.600412	pretrained
RDRDGYSYGSR	3	57183	Acetyl:2H(3)@Any N-term	0	11	24001	24011	27	QE	0.92934	0.944949	0.787777	0.64334	pretrained
RAKQKANQQR	2	57192	Acetyl:2H(3)@Any N-term;Acetyl:2H(3)@K;Acetyl:2H(3)@K	0;3;5	10	24011	24020	27	QE	0.958269	0.967079	0.836194	0.648906	pretrained
RAKQKANQQR	3	57205	Acetyl:2H(3)@Any N-term;Acetyl:2H(3)@K;Acetyl:2H(3)@K	0;3;5	10	24020	24029	27	QE	0.628536	0.702173	0.495573	0.438095	pretrained
RDQALTEEHAR	3	57214	Acetyl:2H(3)@Any N-term	0	11	24029	24039	27	QE	0.850627	0.879283	0.683955	0.437242	pretrained
RGPPPPPR	2	57220	Acetyl:2H(3)@Any N-term	0	8	24039	24046	27	QE	0.633476	0.758981	0.548605	0.805419	pretrained
RDQALTEEHAR	3	57231	Acetyl:2H(3)@Any N-term	0	11	24046	24056	27	QE	0.978067	0.981943	0.878836	0.847467	pretrained
RGPPPPPR	2	57235	Acetyl:2H(3)@Any N-term	0	8	24056	24063	27	QE	0.667575	0.776982	0.566501	0.764094	pretrained
RTPRPLTSAR	3	57237	Acetyl:2H(3)@Any N-term	0	10	24063	24072	27	QE	0.90182	0.922909	0.74839	0.8287	pretrained
RDQALTEEHAR	2	57241	Acetyl:2H(3)@Any N-term	0	11	24072	24082	27	QE	0.931929	0.949038	0.795883	0.656004	pretrained
RAKQKASQQR	2	57242	Acetyl:2H(3)@Any N-term;Acetyl:2H(3)@K;Acetyl:2H(3)@K	0;3;5	10	24082	24091	27	QE	0.958675	0.964689	0.830319	0.554569	pretrained
RSKSKSSSVSR	2	57246	Acetyl:2H(3)@Any N-term;Acetyl:2H(3)@K;Acetyl:2H(3)@K	0;3;5	11	24091	24101	27	QE	0.930446	0.939867	0.778103	0.356754	pretrained
RDQALTEEHAR	3	57249	Acetyl:2H(3)@Any N-term	0	11	24101	24111	27	QE	0.977902	0.982665	0.881291	0.782364	pretrained
RGPPPPPR	2	57252	Acetyl:2H(3)@Any N-term	0	8	24111	24118	27	QE	0.69776	0.800309	0.590662	0.655993	pretrained
RSQAGVSSGAPPGR	3	57275	Acetyl:2H(3)@Any N-term	0	14	24118	24131	27	QE	0.964771	0.968749	0.840425	0.808375	pretrained
RQPPPPPR	2	57285	Acetyl:2H(3)@Any N-term	0	8	24131	24138	27	QE	0.337966	0.526567	0.353042	0.266557	pretrained
RSQAGVSSGAPPGR	2	57296	Acetyl:2H(3)@Any N-term	0	14	24138	24151	27	QE	0.870685	0.885584	0.692483	0.440408	pretrained
RSQAGVSSGAPPGR	2	57320	Acetyl:2H(3)@Any N-term	0	14	24151	24164	27	QE	0.690168	0.717046	0.509013	0.150815	pretrained
RDEGSQDQTGSLSR	2	57348	Acetyl:2H(3)@Any N-term	0	14	24164	24177	27	QE	0.958574	0.963635	0.827788	0.644113	pretrained
RPGPGGKAGSSGSSSGGGGGGPGGR	3	57365	Acetyl:2H(3)@Any N-term;Acetyl:2H(3)@K	0;7	25	24177	24201	27	QE	0.62254	0.671291	0.46852	0.469282	pretrained
RMFGGPGTASRPSSSR	3	57386	Acetyl:2H(3)@Any N-term;Oxidation@M	0;2	16	24201	24216	27	QE	0.897773	0.905699	0.721307	0.773548	pretrained
RSGQRKPATSYVR	3	57447	Acetyl:2H(3)@Any N-term;Acetyl:2H(3)@K	0;6	13	24216	24228	27	QE	0.823633	0.839756	0.634604	0.510747	pretrained
RRGEEGHDPKEPEQLR	4	57457	Acetyl:2H(3)@Any N-term;Acetyl:2H(3)@K	0;10	16	24228	24243	27	QE	0.925964	0.931432	0.76288	0.462351	pretrained
RGSQGDSKQQNGPPRKHIVER	4	57475	Acetyl:2H(3)@Any N-term;Acetyl:2H(3)@K;Acetyl:2H(3)@K	0;8;16	21	24243	24263	27	QE	0.891317	0.904502	0.719515	0.574203	pretrained
RQQEEILRR	3	57497	Acetyl:2H(3)@Any N-term	0	9	24263	24271	27	QE	0.86811	0.889666	0.698126	0.494501	pretrained
RTEATDKKTSDQR	2	57530	Acetyl:2H(3)@Any N-term;Acetyl:2H(3)@K;Acetyl:2H(3)@K	0;7;8	13	24271	24283	27	QE	0.254895	0.316211	0.204822	0.20343	pretrained
RKPLDSR	2	57533	Acetyl:2H(3)@Any N-term;Acetyl:2H(3)@K	0;2	7	24283	24289	27	QE	0.996925	0.997271	0.952956	0.606957	pretrained
RTEATDKKTSDQR	3	57535	Acetyl:2H(3)@Any N-term;Acetyl:2H(3)@K;Acetyl:2H(3)@K	0;7;8	13	24289	24301	27	QE	0.517973	0.585279	0.39803	0.633142	pretrained
REEKTEKPR	2	57539	Acetyl:2H(3)@Any N-term;Acetyl:2H(3)@K;Acetyl:2H(3)@K	0;4;7	9	24301	24309	27	QE	0.769649	0.83149	0.625023	0.813416	pretrained
[truncated: 36,277 more rows]

## Sheet: Chymotrypsin
sequence	charge	spec_idx	mods	mod_sites	nAA	frag_start_idx	frag_stop_idx	nce	instrument	PCC	COS	SA	SPC	model
RSIRGEDHPPS	3	311652	Acetyl:2H(3)@Any N-term	0	11	0	10	27	QE	0.913542	0.922109	0.74707	0.334146	pretrained
RASTSKSESSQK	2	311657	Acetyl:2H(3)@Any N-term;Acetyl:2H(3)@K;Acetyl:2H(3)@K	0;6;12	12	10	21	27	QE	0.850438	0.876031	0.679636	0.255955	pretrained
RSIRGEDHPPS	3	311658	Acetyl:2H(3)@Any N-term	0	11	21	31	27	QE	0.85634	0.869766	0.67146	0.435553	pretrained
RSIRGEDHPPS	3	311661	Acetyl:2H(3)@Any N-term	0	11	31	41	27	QE	0.902437	0.911677	0.730424	0.555441	pretrained
RAAATDHRQEL	3	311706	Acetyl:2H(3)@Any N-term	0	11	41	51	27	QE	0.936834	0.951198	0.800292	0.513321	pretrained
RLRSGEERQDY	3	311772	Acetyl:2H(3)@Any N-term	0	11	51	61	27	QE	0.8037	0.852229	0.6495	0.571857	pretrained
RERAEQESARQL	3	311817	Acetyl:2H(3)@Any N-term	0	12	61	72	27	QE	0.838453	0.878775	0.683278	0.21642	pretrained
RERAEQESARQL	2	311821	Acetyl:2H(3)@Any N-term	0	12	72	83	27	QE	0.825606	0.845883	0.641852	0.163284	pretrained
RASTSKSESSQK	2	311829	Acetyl:2H(3)@Any N-term;Acetyl:2H(3)@K;Acetyl:2H(3)@K	0;6;12	12	83	94	27	QE	0.865324	0.890083	0.698707	0.713249	pretrained
RQHGCTANDANTKY	2	311858	Acetyl:2H(3)@Any N-term;Carbamidomethyl@C;Acetyl:2H(3)@K	0;5;13	14	94	107	27	QE	0.759421	0.813477	0.604856	0.591309	pretrained
RQKVDNFVSTHL	2	311912	Acetyl:2H(3)@Any N-term;Acetyl:2H(3)@K	0;3	12	107	118	27	QE	-0.116622	0.0220682	0.0140502	-0.62692	pretrained
RTESDTAARL	2	312020	Acetyl:2H(3)@Any N-term	0	10	118	127	27	QE	0.956862	0.9642	0.82914	0.779151	pretrained
RDKDNTQRF	2	312033	Acetyl:2H(3)@Any N-term;Acetyl:2H(3)@K	0;3	9	127	135	27	QE	0.94067	0.946403	0.790626	0.884347	pretrained
RTACERAKRTL	3	312067	Acetyl:2H(3)@Any N-term;Carbamidomethyl@C;Acetyl:2H(3)@K	0;4;8	11	135	145	27	QE	0.798312	0.853431	0.650965	0.833114	pretrained
RNQGKRNKDEL	2	312118	Acetyl:2H(3)@Any N-term;Acetyl:2H(3)@K;Acetyl:2H(3)@K	0;5;8	11	145	155	27	QE	0.979481	0.980394	0.873729	0.42636	pretrained
RGKSTEEARKEL	3	312152	Acetyl:2H(3)@Any N-term;Acetyl:2H(3)@K;Acetyl:2H(3)@K	0;3;10	12	155	166	27	QE	0.719191	0.780454	0.570024	0.322269	pretrained
RGKSTEEARKEL	2	312156	Acetyl:2H(3)@Any N-term;Acetyl:2H(3)@K;Acetyl:2H(3)@K	0;3;10	12	166	177	27	QE	0.762577	0.793388	0.58337	0.307963	pretrained
RHGFREGTTPKPKRAAVAASSSS	4	312303	Acetyl:2H(3)@Any N-term;Acetyl:2H(3)@K;Acetyl:2H(3)@K	0;11;13	23	177	199	27	QE	0.788217	0.795589	0.585677	0.625656	pretrained
RAKHTQENCETW	2	312359	Acetyl:2H(3)@Any N-term;Acetyl:2H(3)@K;Carbamidomethyl@C	0;3;9	12	199	210	27	QE	0.744567	0.819785	0.611814	0.591614	pretrained
RAEGTNF	1	312374	Acetyl:2H(3)@Any N-term	0	7	210	216	27	QE	0.781613	0.815406	0.606972	0.516087	pretrained
RAEGTNF	2	312377	Acetyl:2H(3)@Any N-term	0	7	216	222	27	QE	0.984935	0.988473	0.903245	0.900435	pretrained
RQKHSQAVEEL	2	312424	Acetyl:2H(3)@Any N-term;Acetyl:2H(3)@K	0;3	11	222	232	27	QE	0.819481	0.855836	0.653913	0.694934	pretrained
RQKHSQAVEEL	2	312425	Acetyl:2H(3)@Any N-term;Acetyl:2H(3)@K	0;3	11	232	242	27	QE	0.840909	0.869438	0.671038	0.740525	pretrained
RACKEAAY	1	312471	Acetyl:2H(3)@Any N-term;Carbamidomethyl@C;Acetyl:2H(3)@K	0;3;4	8	242	249	27	QE	0.643592	0.70141	0.494892	0.347017	pretrained
RQTTQDAPEEVRNRDF	3	312500	Acetyl:2H(3)@Any N-term	0	16	249	264	27	QE	0.988846	0.98906	0.905744	0.680856	pretrained
REGTTPKPKRAAVAASSSS	2	312511	Acetyl:2H(3)@Any N-term;Acetyl:2H(3)@K;Acetyl:2H(3)@K	0;7;9	19	264	282	27	QE	0.770652	0.779297	0.568847	0.403981	pretrained
RNLTEEERRAEL	3	312591	Acetyl:2H(3)@Any N-term	0	12	282	293	27	QE	0.921697	0.940494	0.779274	0.755673	pretrained
RGKSTEEARKEL	2	312620	Acetyl:2H(3)@Any N-term;Acetyl:2H(3)@K;Acetyl:2H(3)@K	0;3;10	12	293	304	27	QE	0.750478	0.786378	0.576092	0.729598	pretrained
RGKSTEEARKEL	3	312622	Acetyl:2H(3)@Any N-term;Acetyl:2H(3)@K;Acetyl:2H(3)@K	0;3;10	12	304	315	27	QE	0.794073	0.841339	0.636465	0.670965	pretrained
RGKSTEEARKEL	2	312626	Acetyl:2H(3)@Any N-term;Acetyl:2H(3)@K;Acetyl:2H(3)@K	0;3;10	12	315	326	27	QE	0.641686	0.687284	0.482394	-0.118675	pretrained
RGKSTEEARKEL	3	312629	Acetyl:2H(3)@Any N-term;Acetyl:2H(3)@K;Acetyl:2H(3)@K	0;3;10	12	326	337	27	QE	0.725276	0.788907	0.578705	0.682523	pretrained
RSGASGPENF	2	312633	Acetyl:2H(3)@Any N-term	0	10	337	346	27	QE	0.970426	0.974249	0.855213	0.655084	pretrained
RSGASGPENF	1	312634	Acetyl:2H(3)@Any N-term	0	10	346	355	27	QE	0.895713	0.910483	0.72858	0.308108	pretrained
RSQDSMSSDTARTSPVTARTL	3	312715	Acetyl:2H(3)@Any N-term	0	21	355	375	27	QE	0.933922	0.939568	0.777546	0.223547	pretrained
RNRSPEEVTEL	2	312751	Acetyl:2H(3)@Any N-term	0	11	375	385	27	QE	0.954725	0.961043	0.821718	0.441088	pretrained
RKRNVDSSGNKSVL	2	312762	Acetyl:2H(3)@Any N-term;Acetyl:2H(3)@K;Acetyl:2H(3)@K	0;2;11	14	385	398	27	QE	0.632736	0.66361	0.461953	0.615897	pretrained
RRPLPKKPKK	2	312870	Acetyl:2H(3)@Any N-term;Acetyl:2H(3)@K;Acetyl:2H(3)@K;Acetyl:2H(3)@K;Acetyl:2H(3)@K	0;6;7;9;10	10	398	407	27	QE	0.764233	0.796578	0.586717	0.425869	pretrained
RRPLPKKPKK	3	312871	Acetyl:2H(3)@Any N-term;Acetyl:2H(3)@K;Acetyl:2H(3)@K;Acetyl:2H(3)@K;Acetyl:2H(3)@K	0;6;7;9;10	10	407	416	27	QE	0.792276	0.814617	0.606106	0.161133	pretrained
RVQVVDEEGDQQHQEGKRL	3	312925	Acetyl:2H(3)@Any N-term;Acetyl:2H(3)@K	0;17	19	416	434	27	QE	0.950591	0.95872	0.816444	0.693967	pretrained
RKLNEQSPTRCTL	2	312937	Acetyl:2H(3)@Any N-term;Acetyl:2H(3)@K;Carbamidomethyl@C	0;2;11	13	434	446	27	QE	0.679363	0.725746	0.517011	0.161963	pretrained
RGKASIRTF	2	312971	Acetyl:2H(3)@Any N-term;Acetyl:2H(3)@K	0;3	9	446	454	27	QE	0.948994	0.963516	0.827505	0.679619	pretrained
REIQVQHPAAKSM	2	312972	Acetyl:2H(3)@Any N-term;Acetyl:2H(3)@K	0;11	13	454	466	27	QE	0.916305	0.928447	0.757711	0.625326	pretrained
RNDLRPANKL	2	312979	Acetyl:2H(3)@Any N-term;Acetyl:2H(3)@K	0;9	10	466	475	27	QE	0.877616	0.895152	0.705867	0.0240669	pretrained
RGHLDNISNNL	2	313092	Acetyl:2H(3)@Any N-term	0	11	475	485	27	QE	0.814111	0.859439	0.658374	0.689869	pretrained
RVGSHITGGDIY	2	313120	Acetyl:2H(3)@Any N-term	0	12	485	496	27	QE	0.923431	0.935136	0.769446	0.64778	pretrained
RLKEAGTVGRGGGQEERPF	3	313145	Acetyl:2H(3)@Any N-term;Acetyl:2H(3)@K	0;3	19	496	514	27	QE	0.916454	0.926825	0.754947	0.605859	pretrained
REKSEKF	2	313173	Acetyl:2H(3)@Any N-term;Acetyl:2H(3)@K;Acetyl:2H(3)@K	0;3;6	7	514	520	27	QE	0.555588	0.637574	0.440124	0.327826	pretrained
RSVGDGETVEF	2	313175	Acetyl:2H(3)@Any N-term	0	11	520	530	27	QE	0.945559	0.953461	0.805015	0.995122	pretrained
RTEMEDLM	2	313180	Acetyl:2H(3)@Any N-term;Oxidation@M	0;8	8	530	537	27	QE	0.998313	0.998512	0.965267	0.893815	pretrained
RNHIIKDQL	2	313185	Acetyl:2H(3)@Any N-term;Acetyl:2H(3)@K	0;6	9	537	545	27	QE	0.788001	0.835451	0.629587	0.728922	pretrained
REIPSHVL	2	313189	Acetyl:2H(3)@Any N-term	0	8	545	552	27	QE	0.824314	0.850394	0.647273	0.650794	pretrained
REKSEKF	1	313190	Acetyl:2H(3)@Any N-term;Acetyl:2H(3)@K;Acetyl:2H(3)@K	0;3;6	7	552	558	27	QE	0.782703	0.820749	0.612887	0.673478	pretrained
REKSEKF	2	313207	Acetyl:2H(3)@Any N-term;Acetyl:2H(3)@K;Acetyl:2H(3)@K	0;3;6	7	558	564	27	QE	0.791402	0.827853	0.620876	0.88913	pretrained
RDKYRTEIQQQSAL	3	313239	Acetyl:2H(3)@Any N-term;Acetyl:2H(3)@K	0;3	14	564	577	27	QE	0.915828	0.927297	0.755748	0.325536	pretrained
RAQPSVSL	2	313244	Acetyl:2H(3)@Any N-term	0	8	577	584	27	QE	0.932532	0.944072	0.786079	0.394089	pretrained
RTKSTGGAPTF	2	313276	Acetyl:2H(3)@Any N-term;Acetyl:2H(3)@K	0;3	11	584	594	27	QE	0.959093	0.962758	0.825711	0.735929	pretrained
RQQPDTEAVL	2	313326	Acetyl:2H(3)@Any N-term	0	10	594	603	27	QE	0.980188	0.983296	0.883475	0.670142	pretrained
RKGNYAERVGAGAPVYM	3	313359	Acetyl:2H(3)@Any N-term;Acetyl:2H(3)@K;Oxidation@M	0;2;17	17	603	619	27	QE	0.966871	0.967798	0.838003	0.402244	pretrained
RAQDPSEVL	2	313372	Acetyl:2H(3)@Any N-term	0	9	619	627	27	QE	0.994514	0.994757	0.934783	0.606488	pretrained
RAQDPSEVL	1	313381	Acetyl:2H(3)@Any N-term	0	9	627	635	27	QE	0.998802	0.998849	0.96945	0.890029	pretrained
RALQSGQCAGAAL	2	313442	Acetyl:2H(3)@Any N-term;Carbamidomethyl@C	0;8	13	635	647	27	QE	0.864102	0.898651	0.710904	0.520245	pretrained
RALEEGRVREVF	3	313485	Acetyl:2H(3)@Any N-term	0	12	647	658	27	QE	0.945932	0.955008	0.808308	0.625863	pretrained
RALEEGRVREVF	3	313491	Acetyl:2H(3)@Any N-term	0	12	658	669	27	QE	0.947207	0.956177	0.810834	0.537068	pretrained
RTLNETEL	1	313533	Acetyl:2H(3)@Any N-term	0	8	669	676	27	QE	0.906111	0.915717	0.736752	0.38971	pretrained
RKIKPKNSKQAEREEKRVL	3	313648	Acetyl:2H(3)@Any N-term;Acetyl:2H(3)@K;Acetyl:2H(3)@K;Acetyl:2H(3)@K;Acetyl:2H(3)@K;Acetyl:2H(3)@K	0;2;4;6;9;16	19	676	694	27	QE	0.912994	0.918639	0.741421	0.585793	pretrained
RYHPDKNKEPGAEEKF	3	313744	Acetyl:2H(3)@Any N-term;Acetyl:2H(3)@K;Acetyl:2H(3)@K;Acetyl:2H(3)@K	0;6;8;15	16	694	709	27	QE	0.550081	0.61721	0.423474	0.195026	pretrained
RYHPDKNKEPGAEEKF	2	313748	Acetyl:2H(3)@Any N-term;Acetyl:2H(3)@K;Acetyl:2H(3)@K;Acetyl:2H(3)@K	0;6;8;15	16	709	724	27	QE	0.948796	0.953522	0.805143	0.375549	pretrained
RYHPDKNKEPGAEEKF	3	313767	Acetyl:2H(3)@Any N-term;Acetyl:2H(3)@K;Acetyl:2H(3)@K;Acetyl:2H(3)@K	0;6;8;15	16	724	739	27	QE	0.585851	0.645225	0.446473	0.24229	pretrained
RQKAQVEQEL	2	313798	Acetyl:2H(3)@Any N-term;Acetyl:2H(3)@K	0;3	10	739	748	27	QE	0.960776	0.968898	0.840807	0.695753	pretrained
RQKAQVEQEL	2	313800	Acetyl:2H(3)@Any N-term;Acetyl:2H(3)@K	0;3	10	748	757	27	QE	0.946123	0.956716	0.812008	0.581081	pretrained
RQKAQVEQEL	2	313801	Acetyl:2H(3)@Any N-term;Acetyl:2H(3)@K	0;3	10	757	766	27	QE	0.963192	0.970986	0.84627	0.619949	pretrained
RYHPDKNKEPGAEEKF	3	313824	Acetyl:2H(3)@Any N-term;Acetyl:2H(3)@K;Acetyl:2H(3)@K;Acetyl:2H(3)@K	0;6;8;15	16	766	781	27	QE	0.636905	0.689333	0.484193	0.227702	pretrained
REATKAAREALL	2	313894	Acetyl:2H(3)@Any N-term;Acetyl:2H(3)@K	0;5	12	781	792	27	QE	0.746715	0.819088	0.61104	0.453066	pretrained
RVAPEEHPVLL	2	314105	Acetyl:2H(3)@Any N-term	0	11	792	802	27	QE	0.909	0.924175	0.750492	0.559381	pretrained
RVRLAEAEETARTAERQKSQL	4	314115	Acetyl:2H(3)@Any N-term;Acetyl:2H(3)@K	0;18	21	802	822	27	QE	0.780894	0.806153	0.596908	0.400234	pretrained
RRQLETLGQEKL	3	314190	Acetyl:2H(3)@Any N-term;Acetyl:2H(3)@K	0;11	12	822	833	27	QE	0.895018	0.907668	0.724278	0.258985	pretrained
RKLDPGSEETQTL	2	314242	Acetyl:2H(3)@Any N-term;Acetyl:2H(3)@K	0;2	13	833	845	27	QE	0.96136	0.963846	0.828292	0.401813	pretrained
RKLDPGSEETQTL	2	314246	Acetyl:2H(3)@Any N-term;Acetyl:2H(3)@K	0;2	13	845	857	27	QE	0.971268	0.974052	0.85466	0.495332	pretrained
RKLDPGSEETQTL	1	314266	Acetyl:2H(3)@Any N-term;Acetyl:2H(3)@K	0;2	13	857	869	27	QE	0.936697	0.937665	0.774034	0.502497	pretrained
RKLDPGSEETQTL	2	314267	Acetyl:2H(3)@Any N-term;Acetyl:2H(3)@K	0;2	13	869	881	27	QE	0.966536	0.969908	0.843428	0.502931	pretrained
RTPKIVSGKDY	2	314301	Acetyl:2H(3)@Any N-term;Acetyl:2H(3)@K;Acetyl:2H(3)@K	0;4;9	11	881	891	27	QE	0.823073	0.867714	0.668823	0.572983	pretrained
RSIKRIF	2	314311	Acetyl:2H(3)@Any N-term;Acetyl:2H(3)@K	0;4	7	891	897	27	QE	0.899533	0.92932	0.759211	0.737826	pretrained
REDDFRRVVDF	3	314488	Acetyl:2H(3)@Any N-term	0	11	897	907	27	QE	0.703401	0.730535	0.521458	0.487992	pretrained
RVAEEHAPSIVF	2	314628	Acetyl:2H(3)@Any N-term	0	12	907	918	27	QE	0.964974	0.97166	0.848076	0.874912	pretrained
RQAIAERIKPVLM	3	314634	Acetyl:2H(3)@Any N-term;Acetyl:2H(3)@K;Oxidation@M	0;9;13	13	918	930	27	QE	0.975314	0.977913	0.865952	0.604538	pretrained
RKGNYAERVGAGAPVYL	3	314639	Acetyl:2H(3)@Any N-term;Acetyl:2H(3)@K	0;2	17	930	946	27	QE	0.966915	0.969021	0.841126	0.651809	pretrained
RKGNYAERVGAGAPVYL	2	314641	Acetyl:2H(3)@Any N-term;Acetyl:2H(3)@K	0;2	17	946	962	27	QE	0.771598	0.80206	0.592526	0.369551	pretrained
RKGNYAERVGAGAPVYL	2	314651	Acetyl:2H(3)@Any N-term;Acetyl:2H(3)@K	0;2	17	962	978	27	QE	0.514802	0.545582	0.367383	0.0490613	pretrained
RSEIINSKNF	2	314674	Acetyl:2H(3)@Any N-term;Acetyl:2H(3)@K	0;8	10	978	987	27	QE	0.829594	0.857016	0.655368	0.709524	pretrained
RFTQAGSEVSAL	2	314767	Acetyl:2H(3)@Any N-term	0	12	987	998	27	QE	0.883238	0.903695	0.718312	0.341931	pretrained
RTEMEDLM	2	314897	Acetyl:2H(3)@Any N-term	0	8	998	1005	27	QE	0.996687	0.996949	0.950254	0.900383	pretrained
RTEMEDLM	2	314912	Acetyl:2H(3)@Any N-term	0	8	1005	1012	27	QE	0.994286	0.994915	0.935772	0.767926	pretrained
RAVDQSVLL	2	314923	Acetyl:2H(3)@Any N-term	0	9	1012	1020	27	QE	0.826716	0.862253	0.661895	0.368952	pretrained
RLDLAGRDLTDY	2	314980	Acetyl:2H(3)@Any N-term	0	12	1020	1031	27	QE	0.722937	0.757054	0.546724	0.678436	pretrained
RLDLAGRDLTDY	2	315040	Acetyl:2H(3)@Any N-term	0	12	1031	1042	27	QE	0.98324	0.985575	0.891738	0.791684	pretrained
RVNPALAEL	2	315107	Acetyl:2H(3)@Any N-term	0	9	1042	1050	27	QE	0.955956	0.96413	0.828972	0.76118	pretrained
RVNPALAEL	2	315118	Acetyl:2H(3)@Any N-term	0	9	1050	1058	27	QE	0.925771	0.940041	0.778428	0.608504	pretrained
RVSNPGRLAELL	2	315136	Acetyl:2H(3)@Any N-term	0	12	1058	1069	27	QE	0.91518	0.93184	0.763594	0.595983	pretrained
RLGGIGQF	2	315239	Acetyl:2H(3)@Any N-term	0	8	1069	1076	27	QE	0.976645	0.980647	0.874549	0.777504	pretrained
RKANKVGIF	2	315297	Acetyl:2H(3)@Any N-term;Acetyl:2H(3)@K;Acetyl:2H(3)@K	0;2;5	9	1076	1084	27	QE	0.720415	0.777213	0.566734	0.636364	pretrained
RTYDRDNSGMIDKNELKQAL	3	315336	Acetyl:2H(3)@Any N-term;Acetyl:2H(3)@K;Acetyl:2H(3)@K	0;13;17	20	1084	1103	27	QE	0.775925	0.799695	0.590011	0.429993	pretrained
RALQSPALGL	2	315360	Acetyl:2H(3)@Any N-term	0	10	1103	1112	27	QE	0.987084	0.989292	0.906754	0.646461	pretrained
RGGMGSGGLATGIAGGL	2	315515	Acetyl:2H(3)@Any N-term	0	17	1112	1128	27	QE	0.88648	0.908148	0.725008	0.387363	pretrained
RDAKLDKSQIHDIVL	2	315601	Acetyl:2H(3)@Any N-term;Acetyl:2H(3)@K;Acetyl:2H(3)@K	0;4;7	15	1128	1142	27	QE	0.968586	0.971757	0.848337	0.403213	pretrained
RDAKLDKSQIHDIVL	3	315605	Acetyl:2H(3)@Any N-term;Acetyl:2H(3)@K;Acetyl:2H(3)@K	0;4;7	15	1142	1156	27	QE	0.855466	0.870833	0.672839	0.678366	pretrained
RDAKLDKSQIHDIVL	2	315616	Acetyl:2H(3)@Any N-term;Acetyl:2H(3)@K;Acetyl:2H(3)@K	0;4;7	15	1156	1170	27	QE	0.663993	0.705697	0.498732	0.288517	pretrained
REKAKKDLEEW	2	315620	Acetyl:2H(3)@Any N-term;Acetyl:2H(3)@K;Acetyl:2H(3)@K;Acetyl:2H(3)@K	0;3;5;6	11	1170	1180	27	QE	0.741519	0.81306	0.6044	0.197936	pretrained
REAATAVEQEKEIL	2	315659	Acetyl:2H(3)@Any N-term;Acetyl:2H(3)@K	0;11	14	1180	1193	27	QE	0.923482	0.936647	0.772177	0.400623	pretrained
RKELEGLAGQL	2	315866	Acetyl:2H(3)@Any N-term;Acetyl:2H(3)@K	0;2	11	1193	1203	27	QE	0.945804	0.957595	0.813941	0.602251	pretrained
RKELEGLAGQL	2	315868	Acetyl:2H(3)@Any N-term;Acetyl:2H(3)@K	0;2	11	1203	1213	27	QE	0.9081	0.928509	0.757817	0.58621	pretrained
RDAAPKMYKEEGLKAF	2	315915	Acetyl:2H(3)@Any N-term;Acetyl:2H(3)@K;Acetyl:2H(3)@K;Acetyl:2H(3)@K	0;6;9;14	16	1213	1228	27	QE	0.254327	0.362767	0.236336	-0.100945	pretrained
RLDLAGRDLTDYLM	2	316036	Acetyl:2H(3)@Any N-term;Oxidation@M	0;14	14	1228	1241	27	QE	0.978112	0.980036	0.872579	0.44489	pretrained
RKEVEGDDVPESIML	2	316045	Acetyl:2H(3)@Any N-term;Acetyl:2H(3)@K	0;2	15	1241	1255	27	QE	0.967203	0.969707	0.842902	0.480861	pretrained
RNIENSDKAIKLL	2	316088	Acetyl:2H(3)@Any N-term;Acetyl:2H(3)@K;Acetyl:2H(3)@K	0;8;11	13	1255	1267	27	QE	0.925374	0.93746	0.773659	0.811496	pretrained
RGLQKEEVVLL	2	316205	Acetyl:2H(3)@Any N-term;Acetyl:2H(3)@K	0;5	11	1267	1277	27	QE	0.95559	0.964625	0.830163	0.56651	pretrained
RGIFPVL	2	316440	Acetyl:2H(3)@Any N-term	0	7	1277	1283	27	QE	0.995566	0.995775	0.941459	0.637391	pretrained
RGNTQKATCM	2	316597	Acetyl:2H(3)@Any N-term;Acetyl:2H(3)@K;Carbamidomethyl@C;Oxidation@M	0;6;9;10	10	1283	1292	27	QE	0.929698	0.943387	0.784759	0.664221	pretrained
RRMEELHNQEM	3	316678	Acetyl:2H(3)@Any N-term;Oxidation@M	0;11	11	1292	1302	27	QE	0.975522	0.978326	0.867215	0.499156	pretrained
RASTSKSESSQK	2	316750	Acetyl:2H(3)@Any N-term;Acetyl:2H(3)@K;Acetyl:2H(3)@K	0;6;12	12	1302	1313	27	QE	0.854102	0.882821	0.688718	0.454757	pretrained
RDNGKHAL	2	316779	Acetyl:2H(3)@Any N-term;Acetyl:2H(3)@K	0;5	8	1313	1320	27	QE	0.889943	0.909542	0.727135	0.677887	pretrained
RNKSSGQSRGF	2	316780	Acetyl:2H(3)@Any N-term;Acetyl:2H(3)@K	0;3	11	1320	1330	27	QE	0.84676	0.880857	0.686065	0.370919	pretrained
RTHGTCAENF	2	316829	Acetyl:2H(3)@Any N-term;Carbamidomethyl@C	0;6	10	1330	1339	27	QE	0.679009	0.779024	0.56857	0.503089	pretrained
RGGSDGYGSGRGF	3	316843	Acetyl:2H(3)@Any N-term	0	13	1339	1351	27	QE	0.985102	0.986501	0.895279	0.574848	pretrained
REEQRKKAM	2	316911	Acetyl:2H(3)@Any N-term;Acetyl:2H(3)@K;Acetyl:2H(3)@K	0;6;7	9	1351	1359	27	QE	0.300988	0.489663	0.32576	0.0782624	pretrained
RSDPNRETDDTL	2	316964	Acetyl:2H(3)@Any N-term	0	12	1359	1370	27	QE	0.988408	0.98945	0.907446	0.8642	pretrained
RRPYEKGRL	3	316997	Acetyl:2H(3)@Any N-term;Acetyl:2H(3)@K	0;6	9	1370	1378	27	QE	0.757907	0.817217	0.608968	0.418072	pretrained
RKEDCQRF	2	317015	Acetyl:2H(3)@Any N-term;Acetyl:2H(3)@K;Carbamidomethyl@C	0;2;5	8	1378	1385	27	QE	0.894351	0.906791	0.722951	0.83908	pretrained
RKAAAKKD	2	317019	Acetyl:2H(3)@Any N-term;Acetyl:2H(3)@K;Acetyl:2H(3)@K;Acetyl:2H(3)@K	0;2;6;7	8	1385	1392	27	QE	0.945463	0.953971	0.806093	0.5104	pretrained
RKAAAKKD	1	317021	Acetyl:2H(3)@Any N-term;Acetyl:2H(3)@K;Acetyl:2H(3)@K;Acetyl:2H(3)@K	0;2;6;7	8	1392	1399	27	QE	0.690268	0.740604	0.530921	0.190476	pretrained
RAAQDRDQIY	2	317060	Acetyl:2H(3)@Any N-term	0	10	1399	1408	27	QE	0.941597	0.953054	0.804158	0.68417	pretrained
REGTTPKPKRAAVAASSSS	3	317064	Acetyl:2H(3)@Any N-term;Acetyl:2H(3)@K;Acetyl:2H(3)@K	0;7;9	19	1408	1426	27	QE	0.669667	0.711381	0.50386	0.411136	pretrained
RGKSTEEARKEL	3	317072	Acetyl:2H(3)@Any N-term;Acetyl:2H(3)@K;Acetyl:2H(3)@K	0;3;10	12	1426	1437	27	QE	0.671968	0.742993	0.533188	0.382664	pretrained
REGTTPKPKRAAVAASSSS	3	317108	Acetyl:2H(3)@Any N-term;Acetyl:2H(3)@K;Acetyl:2H(3)@K	0;7;9	19	1437	1455	27	QE	0.771953	0.800199	0.590546	0.346212	pretrained
RGGSDGYGSGRGF	3	317119	Acetyl:2H(3)@Any N-term	0	13	1455	1467	27	QE	0.676402	0.703104	0.496407	0.0895571	pretrained
RGGSDGYGSGRGF	3	317126	Acetyl:2H(3)@Any N-term	0	13	1467	1479	27	QE	0.669553	0.697611	0.491507	0.151921	pretrained
RNHPQLSAM	2	317187	Acetyl:2H(3)@Any N-term	0	9	1479	1487	27	QE	0.886381	0.907285	0.723698	0.445565	pretrained
RKHEGLERDL	3	317191	Acetyl:2H(3)@Any N-term;Acetyl:2H(3)@K	0;2	10	1487	1496	27	QE	0.6957	0.751775	0.541605	0.598198	pretrained
REIRRYQKSTEL	4	317253	Acetyl:2H(3)@Any N-term;Acetyl:2H(3)@K	0;8	12	1496	1507	27	QE	0.828062	0.837551	0.632026	0.0490486	pretrained
RSGASGPENF	2	317531	Acetyl:2H(3)@Any N-term	0	10	1507	1516	27	QE	0.967042	0.97128	0.847056	0.609395	pretrained
RRRKPDTIEVQQM	3	317612	Acetyl:2H(3)@Any N-term;Acetyl:2H(3)@K	0;4	13	1516	1528	27	QE	0.950472	0.955671	0.809735	0.738059	pretrained
RQIRQGNTKQRIDEF	3	317773	Acetyl:2H(3)@Any N-term;Acetyl:2H(3)@K	0;9	15	1528	1542	27	QE	0.861106	0.884336	0.690777	0.41285	pretrained
RLNSVQSSERPL	2	317809	Acetyl:2H(3)@Any N-term	0	12	1542	1553	27	QE	0.931865	0.941068	0.780352	0.276603	pretrained
RHREQKEKTGEEINF	3	317840	Acetyl:2H(3)@Any N-term;Acetyl:2H(3)@K;Acetyl:2H(3)@K	0;6;8	15	1553	1567	27	QE	0.954092	0.958157	0.815186	0.546548	pretrained
RNPSDRKVCF	2	317877	Acetyl:2H(3)@Any N-term;Acetyl:2H(3)@K;Carbamidomethyl@C	0;7;9	10	1567	1576	27	QE	0.626402	0.702421	0.495795	0.377992	pretrained
REQATGAKDTKPM	2	317940	Acetyl:2H(3)@Any N-term;Acetyl:2H(3)@K;Acetyl:2H(3)@K	0;8;11	13	1576	1588	27	QE	0.943042	0.948309	0.794415	0.553517	pretrained
RQGELNKGRRIAF	3	318023	Acetyl:2H(3)@Any N-term;Acetyl:2H(3)@K	0;7	13	1588	1600	27	QE	0.933991	0.944652	0.787201	0.543422	pretrained
RSSVPGVRL	2	318061	Acetyl:2H(3)@Any N-term	0	9	1600	1608	27	QE	0.870026	0.903298	0.717723	0.837427	pretrained
RKKIEKRNL	2	318080	Acetyl:2H(3)@Any N-term;Acetyl:2H(3)@K;Acetyl:2H(3)@K;Acetyl:2H(3)@K	0;2;3;6	9	1608	1616	27	QE	0.927166	0.933304	0.766177	0.84989	pretrained
RKKIEKRNL	3	318082	Acetyl:2H(3)@Any N-term;Acetyl:2H(3)@K;Acetyl:2H(3)@K;Acetyl:2H(3)@K	0;2;3;6	9	1616	1624	27	QE	0.717368	0.777941	0.567471	0.771811	pretrained
RLEHENPSDPQTPL	2	318098	Acetyl:2H(3)@Any N-term	0	14	1624	1637	27	QE	0.981027	0.982685	0.881357	0.748527	pretrained
RNKIAGY	2	318223	Acetyl:2H(3)@Any N-term;Acetyl:2H(3)@K	0;3	7	1637	1643	27	QE	0.962533	0.971426	0.847447	0.875217	pretrained
RKPESQEAAPL	2	318226	Acetyl:2H(3)@Any N-term;Acetyl:2H(3)@K	0;2	11	1643	1653	27	QE	0.995406	0.995336	0.938488	0.675516	pretrained
RKPESQEAAPL	2	318231	Acetyl:2H(3)@Any N-term;Acetyl:2H(3)@K	0;2	11	1653	1663	27	QE	0.994607	0.994943	0.935949	0.605722	pretrained
RKPESQEAAPL	1	318232	Acetyl:2H(3)@Any N-term;Acetyl:2H(3)@K	0;2	11	1663	1673	27	QE	0.820785	0.842509	0.637845	0.582364	pretrained
RKPESQEAAPL	2	318237	Acetyl:2H(3)@Any N-term;Acetyl:2H(3)@K	0;2	11	1673	1683	27	QE	0.996479	0.996554	0.947137	0.821388	pretrained
RHIVKEF	2	318298	Acetyl:2H(3)@Any N-term;Acetyl:2H(3)@K	0;5	7	1683	1689	27	QE	0.941907	0.95738	0.813466	0.985217	pretrained
RKEEERKKALDERL	3	318325	Acetyl:2H(3)@Any N-term;Acetyl:2H(3)@K;Acetyl:2H(3)@K;Acetyl:2H(3)@K	0;2;7;8	14	1689	1702	27	QE	0.851143	0.862272	0.661918	0.546615	pretrained
RGGDVARTVGGGQKVRW	3	318342	Acetyl:2H(3)@Any N-term;Acetyl:2H(3)@K	0;14	17	1702	1718	27	QE	0.799496	0.83255	0.62624	0.247688	pretrained
RQKNQTSKSTTGPF	2	318390	Acetyl:2H(3)@Any N-term;Acetyl:2H(3)@K;Acetyl:2H(3)@K	0;3;8	14	1718	1731	27	QE	0.941473	0.949525	0.796868	0.719244	pretrained
RGVKGTTGTQASF	2	318410	Acetyl:2H(3)@Any N-term;Acetyl:2H(3)@K	0;4	13	1731	1743	27	QE	0.952842	0.962974	0.82622	0.55102	pretrained
RSEPDDSDPF	2	318515	Acetyl:2H(3)@Any N-term	0	10	1743	1752	27	QE	0.992536	0.993039	0.924839	0.723809	pretrained
RAKQEQEAKQKL	2	318590	Acetyl:2H(3)@Any N-term;Acetyl:2H(3)@K;Acetyl:2H(3)@K;Acetyl:2H(3)@K	0;3;9;11	12	1752	1763	27	QE	0.954748	0.963082	0.826476	0.67012	pretrained
RAAINQKL	2	318656	Acetyl:2H(3)@Any N-term;Acetyl:2H(3)@K	0;7	8	1763	1770	27	QE	0.668038	0.738681	0.529102	0.394362	pretrained
RYHPDKNKEPGAEEKF	3	318686	Acetyl:2H(3)@Any N-term;Acetyl:2H(3)@K;Acetyl:2H(3)@K;Acetyl:2H(3)@K	0;6;8;15	16	1770	1785	27	QE	0.53837	0.609086	0.416927	0.177133	pretrained
RYHPDKNKEPGAEEKF	2	318695	Acetyl:2H(3)@Any N-term;Acetyl:2H(3)@K;Acetyl:2H(3)@K;Acetyl:2H(3)@K	0;6;8;15	16	1785	1800	27	QE	0.932713	0.939819	0.778013	0.336093	pretrained
RYHPDKNKEPGAEEKF	2	318699	Acetyl:2H(3)@Any N-term;Acetyl:2H(3)@K;Acetyl:2H(3)@K;Acetyl:2H(3)@K	0;6;8;15	16	1800	1815	27	QE	0.948587	0.952907	0.803847	0.33576	pretrained
RYHPDKNKEPGAEEKF	3	318704	Acetyl:2H(3)@Any N-term;Acetyl:2H(3)@K;Acetyl:2H(3)@K;Acetyl:2H(3)@K	0;6;8;15	16	1815	1830	27	QE	0.547161	0.613684	0.420626	0.37666	pretrained
RYHPDKNKEPGAEEKF	3	318705	Acetyl:2H(3)@Any N-term;Acetyl:2H(3)@K;Acetyl:2H(3)@K;Acetyl:2H(3)@K	0;6;8;15	16	1830	1845	27	QE	0.546073	0.613427	0.420419	0.352848	pretrained
RLSQECEKL	2	318727	Acetyl:2H(3)@Any N-term;Carbamidomethyl@C;Acetyl:2H(3)@K	0;6;8	9	1845	1853	27	QE	0.82658	0.861654	0.661142	0.450696	pretrained
RLSQECEKL	1	318744	Acetyl:2H(3)@Any N-term;Carbamidomethyl@C;Acetyl:2H(3)@K	0;6;8	9	1853	1861	27	QE	0.628207	0.673325	0.470269	-0.0956745	pretrained
RLSQECEKL	2	318747	Acetyl:2H(3)@Any N-term;Carbamidomethyl@C;Acetyl:2H(3)@K	0;6;8	9	1861	1869	27	QE	0.839771	0.872276	0.674713	0.668438	pretrained
RLSQECEKL	2	318750	Acetyl:2H(3)@Any N-term;Carbamidomethyl@C;Acetyl:2H(3)@K	0;6;8	9	1869	1877	27	QE	0.797254	0.836344	0.630623	0.435117	pretrained
RLSQECEKL	2	318751	Acetyl:2H(3)@Any N-term;Carbamidomethyl@C;Acetyl:2H(3)@K	0;6;8	9	1877	1885	27	QE	0.749257	0.799143	0.589426	0.525843	pretrained
RVDREGSPVLL	2	318856	Acetyl:2H(3)@Any N-term	0	11	1885	1895	27	QE	0.889951	0.912238	0.731294	0.462664	pretrained
RPETKQEKKQRLL	3	319029	Acetyl:2H(3)@Any N-term;Acetyl:2H(3)@K;Acetyl:2H(3)@K;Acetyl:2H(3)@K	0;5;8;9	13	1895	1907	27	QE	0.7458	0.804265	0.594882	0.644214	pretrained
RLDLAGRDL	2	319083	Acetyl:2H(3)@Any N-term	0	9	1907	1915	27	QE	0.741735	0.816336	0.607996	0.528592	pretrained
RKLDPGSEETQTL	2	319214	Acetyl:2H(3)@Any N-term;Acetyl:2H(3)@K	0;2	13	1915	1927	27	QE	0.967506	0.970601	0.84525	0.484043	pretrained
RSIKRIF	2	319257	Acetyl:2H(3)@Any N-term;Acetyl:2H(3)@K	0;4	7	1927	1933	27	QE	0.895945	0.927216	0.755611	0.81913	pretrained
REIAQDF	2	319291	Acetyl:2H(3)@Any N-term	0	7	1933	1939	27	QE	0.965395	0.972585	0.850589	0.902174	pretrained
RDYSRTIPGKQQLL	3	319309	Acetyl:2H(3)@Any N-term;Acetyl:2H(3)@K	0;10	14	1939	1952	27	QE	0.836572	0.858102	0.656713	0.552975	pretrained
RKVSQERGQLEANLL	3	319429	Acetyl:2H(3)@Any N-term;Acetyl:2H(3)@K	0;2	15	1952	1966	27	QE	0.993923	0.99437	0.932414	0.801162	pretrained
REDDFRRVVDF	3	319440	Acetyl:2H(3)@Any N-term	0	11	1966	1976	27	QE	0.858839	0.870397	0.672275	0.387148	pretrained
RELVEPRKQDADSLQRAW	3	319478	Acetyl:2H(3)@Any N-term;Acetyl:2H(3)@K	0;8	18	1976	1993	27	QE	0.948364	0.953355	0.80479	0.217391	pretrained
RDEVEAKAKL	2	319491	Acetyl:2H(3)@Any N-term;Acetyl:2H(3)@K;Acetyl:2H(3)@K	0;7;9	10	1993	2002	27	QE	0.895678	0.915592	0.736554	0.354183	pretrained
RSGKYDLDFKSPDDPSRY	3	319505	Acetyl:2H(3)@Any N-term;Acetyl:2H(3)@K;Acetyl:2H(3)@K	0;4;10	18	2002	2019	27	QE	0.948878	0.955044	0.808385	0.663721	pretrained
RGPAGDATVASEKESVM	2	319560	Acetyl:2H(3)@Any N-term;Acetyl:2H(3)@K	0;13	17	2019	2035	27	QE	0.968151	0.97183	0.848535	0.4481	pretrained
RVDPKRDIVL	2	319575	Acetyl:2H(3)@Any N-term;Acetyl:2H(3)@K	0;5	10	2035	2044	27	QE	0.98403	0.982393	0.88036	0.538867	pretrained
RITGDPYKVQQAKEM	2	319590	Acetyl:2H(3)@Any N-term;Acetyl:2H(3)@K;Acetyl:2H(3)@K	0;8;13	15	2044	2058	27	QE	0.261206	0.359904	0.234381	0.133459	pretrained
RITGDPYKVQQAKEM	3	319597	Acetyl:2H(3)@Any N-term;Acetyl:2H(3)@K;Acetyl:2H(3)@K	0;8;13	15	2058	2072	27	QE	0.213746	0.309725	0.200474	-0.377273	pretrained
RERLTELERKL	3	319667	Acetyl:2H(3)@Any N-term;Acetyl:2H(3)@K	0;10	11	2072	2082	27	QE	0.631675	0.733085	0.523841	0.434146	pretrained
RTSLGPNGLDKM	2	319747	Acetyl:2H(3)@Any N-term;Acetyl:2H(3)@K	0;11	12	2082	2093	27	QE	0.884384	0.907247	0.723641	0.736786	pretrained
RAIVDCGF	2	319770	Acetyl:2H(3)@Any N-term;Carbamidomethyl@C	0;6	8	2093	2100	27	QE	0.987951	0.99028	0.911167	0.849754	pretrained
RTSLGPNGLDKM	2	319775	Acetyl:2H(3)@Any N-term;Acetyl:2H(3)@K	0;11	12	2100	2111	27	QE	0.874377	0.898241	0.710309	0.468076	pretrained
RAIVDCGF	1	319777	Acetyl:2H(3)@Any N-term;Carbamidomethyl@C	0;6	8	2111	2118	27	QE	0.986213	0.986184	0.894053	0.693487	pretrained
RRDSFDDRGPSLNPVLDY	3	319785	Acetyl:2H(3)@Any N-term	0	18	2118	2135	27	QE	0.927559	0.935922	0.770863	0.718956	pretrained
RAIVDCGF	2	319796	Acetyl:2H(3)@Any N-term;Carbamidomethyl@C	0;6	8	2135	2142	27	QE	0.994752	0.995883	0.942211	0.849206	pretrained
RRTVPPAVTGITF	2	319820	Acetyl:2H(3)@Any N-term	0	13	2142	2154	27	QE	0.972328	0.9769	0.8629	0.68465	pretrained
RRTVPPAVTGITF	2	319828	Acetyl:2H(3)@Any N-term	0	13	2154	2166	27	QE	0.956058	0.9629	0.826047	0.682805	pretrained
RVKEDENVPF	2	319839	Acetyl:2H(3)@Any N-term;Acetyl:2H(3)@K	0;3	10	2166	2175	27	QE	0.987308	0.986788	0.896398	0.552638	pretrained
RKQAEEIGEKL	2	319955	Acetyl:2H(3)@Any N-term;Acetyl:2H(3)@K;Acetyl:2H(3)@K	0;2;10	11	2175	2185	27	QE	0.953889	0.960904	0.821398	0.664446	pretrained
RKISSDLDGHPVPKQAF	3	319961	Acetyl:2H(3)@Any N-term;Acetyl:2H(3)@K;Acetyl:2H(3)@K	0;2;14	17	2185	2201	27	QE	0.795449	0.830425	0.623805	0.428846	pretrained
RGVQDIVVGEGTHF	2	319969	Acetyl:2H(3)@Any N-term	0	14	2201	2214	27	QE	0.981388	0.984146	0.886489	0.701486	pretrained
REKLQEEML	2	320109	Acetyl:2H(3)@Any N-term;Acetyl:2H(3)@K	0;3	9	2214	2222	27	QE	0.920715	0.941205	0.78061	0.669538	pretrained
RVDKAAAAAAAL	2	320199	Acetyl:2H(3)@Any N-term;Acetyl:2H(3)@K	0;4	12	2222	2233	27	QE	0.874259	0.902966	0.71723	0.542424	pretrained
RVAGAQIQGAKEVL	2	320252	Acetyl:2H(3)@Any N-term;Acetyl:2H(3)@K	0;11	14	2233	2246	27	QE	0.87442	0.900213	0.713178	0.628917	pretrained
RKLAEQFPRQVL	2	320284	Acetyl:2H(3)@Any N-term;Acetyl:2H(3)@K	0;2	12	2246	2257	27	QE	0.875607	0.909466	0.727019	0.788654	pretrained
RKVDVDEYDENKF	2	320315	Acetyl:2H(3)@Any N-term;Acetyl:2H(3)@K;Acetyl:2H(3)@K	0;2;12	13	2257	2269	27	QE	0.844778	0.87807	0.682339	0.629179	pretrained
RQVVQGLL	2	320570	Acetyl:2H(3)@Any N-term	0	8	2269	2276	27	QE	0.983577	0.985675	0.892116	0.682266	pretrained
RLPSGLGCSTVL	2	320760	Acetyl:2H(3)@Any N-term;Carbamidomethyl@C	0;8	12	2276	2287	27	QE	0.952574	0.961393	0.822527	0.785765	pretrained
RAVGNIVTGTDEQTQVVL	2	320840	Acetyl:2H(3)@Any N-term	0	18	2287	2304	27	QE	0.970304	0.974872	0.856983	0.760755	pretrained
RLVGGKDFEQPL	2	320870	Acetyl:2H(3)@Any N-term;Acetyl:2H(3)@K	0;6	12	2304	2315	27	QE	0.978635	0.979949	0.872299	0.646582	pretrained
RVGKAVTPPMPL	2	320897	Acetyl:2H(3)@Any N-term;Acetyl:2H(3)@K	0;4	12	2315	2326	27	QE	0.966831	0.96934	0.841948	0.528823	pretrained
RDAKLDKAQIHDLVL	2	320921	Acetyl:2H(3)@Any N-term;Acetyl:2H(3)@K;Acetyl:2H(3)@K	0;4;7	15	2326	2340	27	QE	0.972499	0.975999	0.86024	0.549556	pretrained
RDAKLDKAQIHDLVL	3	320924	Acetyl:2H(3)@Any N-term;Acetyl:2H(3)@K;Acetyl:2H(3)@K	0;4;7	15	2340	2354	27	QE	0.80038	0.82871	0.62185	0.733288	pretrained
RIINEPTAAAIAYGLDRTGKGERNVL	3	321023	Acetyl:2H(3)@Any N-term;Acetyl:2H(3)@K	0;20	26	2354	2379	27	QE	0.885483	0.891672	0.700935	0.330657	pretrained
RIINEPTAAAIAYGLDRTGKGERNVL	4	321031	Acetyl:2H(3)@Any N-term;Acetyl:2H(3)@K	0;20	26	2379	2404	27	QE	0.922354	0.932071	0.764	0.680378	pretrained
RFTPPLEDSCF	2	321087	Acetyl:2H(3)@Any N-term;Carbamidomethyl@C	0;10	11	2404	2414	27	QE	0.919251	0.932993	0.765625	0.760882	pretrained
RMLAEDELRDAVLL	2	321139	Acetyl:2H(3)@Any N-term;Oxidation@M	0;2	14	2414	2427	27	QE	0.942186	0.949792	0.797412	0.751003	pretrained
RLDLAGRDLTDYLM	2	321153	Acetyl:2H(3)@Any N-term;Oxidation@M	0;14	14	2427	2440	27	QE	0.979076	0.980939	0.875502	0.467216	pretrained
RLDLAGRDLTDYLM	3	321160	Acetyl:2H(3)@Any N-term;Oxidation@M	0;14	14	2440	2453	27	QE	0.926175	0.931382	0.762791	0.857509	pretrained
RLEAPDADELPKGEFDPGQDTY	3	321199	Acetyl:2H(3)@Any N-term;Acetyl:2H(3)@K	0;12	22	2453	2474	27	QE	0.930449	0.936736	0.772338	0.489622	pretrained
RLEAPDADELPKGEFDPGQDTY	2	321205	Acetyl:2H(3)@Any N-term;Acetyl:2H(3)@K	0;12	22	2474	2495	27	QE	0.904233	0.911899	0.730768	0.503726	pretrained
RVIDLKSEL	2	321258	Acetyl:2H(3)@Any N-term;Acetyl:2H(3)@K	0;6	9	2495	2503	27	QE	0.903566	0.917495	0.739584	0.884531	pretrained
RATENDIANFF	2	321350	Acetyl:2H(3)@Any N-term	0	11	2503	2513	27	QE	0.990086	0.991453	0.916707	0.9303	pretrained
REEGKAEIIPGVL	2	321356	Acetyl:2H(3)@Any N-term;Acetyl:2H(3)@K	0;5	13	2513	2525	27	QE	0.95445	0.957998	0.814833	0.825445	pretrained
RGVDLDQLL	2	321384	Acetyl:2H(3)@Any N-term	0	9	2525	2533	27	QE	0.966398	0.971423	0.847438	0.637463	pretrained
RGVDLDQLL	1	321387	Acetyl:2H(3)@Any N-term	0	9	2533	2541	27	QE	0.993812	0.994257	0.93174	0.765946	pretrained
RKLEAAEDIAYQL	2	321628	Acetyl:2H(3)@Any N-term;Acetyl:2H(3)@K	0;2	13	2541	2553	27	QE	0.918071	0.928961	0.758593	0.643997	pretrained
RKSPVAKDVDLEFL	2	321668	Acetyl:2H(3)@Any N-term;Acetyl:2H(3)@K;Acetyl:2H(3)@K	0;2;7	14	2553	2566	27	QE	0.749301	0.801397	0.591819	0.559208	pretrained
RKSPVAKDVDLEFL	3	321678	Acetyl:2H(3)@Any N-term;Acetyl:2H(3)@K;Acetyl:2H(3)@K	0;2;7	14	2566	2579	27	QE	0.757715	0.792017	0.581938	0.362887	pretrained
RKSPVAKDVDLEFL	3	321682	Acetyl:2H(3)@Any N-term;Acetyl:2H(3)@K;Acetyl:2H(3)@K	0;2;7	14	2579	2592	27	QE	0.556976	0.627484	0.431831	0.307948	pretrained
RKSPVAKDVDLEFL	2	321690	Acetyl:2H(3)@Any N-term;Acetyl:2H(3)@K;Acetyl:2H(3)@K	0;2;7	14	2592	2605	27	QE	0.784385	0.833614	0.627465	0.575301	pretrained
RDRENYDRGY	3	322022	Acetyl:2H(3)@Any N-term	0	10	2605	2614	27	QE	0.874555	0.911366	0.729943	0.837709	pretrained
RQREESETRSESSDF	3	322087	Acetyl:2H(3)@Any N-term	0	15	2614	2628	27	QE	0.959163	0.963461	0.827374	0.531306	pretrained
RANNPEQNRL	2	322111	Acetyl:2H(3)@Any N-term	0	10	2628	2637	27	QE	0.890305	0.915919	0.737073	0.682625	pretrained
RAQHEDQVEQY	2	322120	Acetyl:2H(3)@Any N-term	0	11	2637	2647	27	QE	0.256535	0.455977	0.30142	0.0654784	pretrained
RSQHDEQVRL	3	322126	Acetyl:2H(3)@Any N-term	0	10	2647	2656	27	QE	0.876971	0.903684	0.718296	0.736551	pretrained
RAAHSEGNTTAGL	2	322132	Acetyl:2H(3)@Any N-term	0	13	2656	2668	27	QE	0.838331	0.880104	0.685054	0.557371	pretrained
RKSHEAREKL	3	322154	Acetyl:2H(3)@Any N-term;Acetyl:2H(3)@K;Acetyl:2H(3)@K	0;2;9	10	2668	2677	27	QE	0.893459	0.908242	0.725151	0.390862	pretrained
RKKQSDVM	2	322184	Acetyl:2H(3)@Any N-term;Acetyl:2H(3)@K;Acetyl:2H(3)@K;Oxidation@M	0;2;3;8	8	2677	2684	27	QE	0.865557	0.887785	0.695513	0.565681	pretrained
RTHTGEKPY	2	322202	Acetyl:2H(3)@Any N-term;Acetyl:2H(3)@K	0;7	9	2684	2692	27	QE	0.979892	0.9809	0.875375	0.557185	pretrained
RTACERAKRTL	3	322341	Acetyl:2H(3)@Any N-term;Carbamidomethyl@C;Acetyl:2H(3)@K	0;4;8	11	2692	2702	27	QE	0.594088	0.697885	0.491751	0.803565	pretrained
RRPYEKGRL	3	322344	Acetyl:2H(3)@Any N-term;Acetyl:2H(3)@K	0;6	9	2702	2710	27	QE	0.716544	0.787561	0.577313	0.228556	pretrained
RANVEEERAARL	3	322410	Acetyl:2H(3)@Any N-term	0	12	2710	2721	27	QE	0.914267	0.935388	0.7699	0.748626	pretrained
RGGSDGYGSGRGF	3	322474	Acetyl:2H(3)@Any N-term	0	13	2721	2733	27	QE	0.657205	0.688134	0.48314	0.0200825	pretrained
RGGSDGYGSGRGF	2	322477	Acetyl:2H(3)@Any N-term	0	13	2733	2745	27	QE	0.961586	0.965556	0.832426	0.694095	pretrained
RDKIPEEDRRKM	3	322530	Acetyl:2H(3)@Any N-term;Acetyl:2H(3)@K;Acetyl:2H(3)@K;Oxidation@M	0;3;11;12	12	2745	2756	27	QE	0.82028	0.859896	0.658944	0.464905	pretrained
RGGSDGYGSGRGF	2	322547	Acetyl:2H(3)@Any N-term	0	13	2756	2768	27	QE	0.97568	0.978097	0.866512	0.591403	pretrained
RGAQEVGERL	2	322643	Acetyl:2H(3)@Any N-term	0	10	2768	2777	27	QE	0.865778	0.90665	0.722739	0.593822	pretrained
RVNQPDRECKHKADSL	3	322659	Acetyl:2H(3)@Any N-term;Carbamidomethyl@C;Acetyl:2H(3)@K;Acetyl:2H(3)@K	0;9;10;12	16	2777	2792	27	QE	0.714943	0.741778	0.532035	0.364212	pretrained
RKKKDSVT	2	322695	Acetyl:2H(3)@Any N-term;Acetyl:2H(3)@K;Acetyl:2H(3)@K;Acetyl:2H(3)@K	0;2;3;4	8	2792	2799	27	QE	0.260705	0.448277	0.295925	0.659004	pretrained
RDQKDGYRKNEGY	3	322729	Acetyl:2H(3)@Any N-term;Acetyl:2H(3)@K;Acetyl:2H(3)@K	0;4;9	13	2799	2811	27	QE	0.735939	0.773857	0.563351	0.187419	pretrained
RTNLGPKGTM	2	322730	Acetyl:2H(3)@Any N-term;Acetyl:2H(3)@K;Oxidation@M	0;7;10	10	2811	2820	27	QE	0.664238	0.714938	0.50709	0.344659	pretrained
RSRVRGADAAQAKVL	3	322735	Acetyl:2H(3)@Any N-term;Acetyl:2H(3)@K	0;13	15	2820	2834	27	QE	0.786011	0.803571	0.594139	0.686876	pretrained
REGERPSLRL	3	322761	Acetyl:2H(3)@Any N-term	0	10	2834	2843	27	QE	0.784632	0.839052	0.633779	0.778893	pretrained
RVDSAATSGY	2	322805	Acetyl:2H(3)@Any N-term	0	10	2843	2852	27	QE	0.963886	0.970312	0.844486	0.247233	pretrained
RARSEPEDPVTERSAF	3	322940	Acetyl:2H(3)@Any N-term	0	16	2852	2867	27	QE	0.980617	0.981679	0.877951	0.513559	pretrained
RDKIPEEDRRKM	3	322971	Acetyl:2H(3)@Any N-term;Acetyl:2H(3)@K;Acetyl:2H(3)@K	0;3;11	12	2867	2878	27	QE	0.774681	0.826868	0.619759	0.508739	pretrained
RDKIPEEDRRKM	3	322981	Acetyl:2H(3)@Any N-term;Acetyl:2H(3)@K;Acetyl:2H(3)@K	0;3;11	12	2878	2889	27	QE	0.811215	0.852586	0.649934	0.529316	pretrained
RRECPSDECGAGVF	2	323056	Acetyl:2H(3)@Any N-term;Carbamidomethyl@C;Carbamidomethyl@C	0;4;9	14	2889	2902	27	QE	0.875108	0.888057	0.695891	0.463587	pretrained
RKDPNKL	2	323092	Acetyl:2H(3)@Any N-term;Acetyl:2H(3)@K;Acetyl:2H(3)@K	0;2;6	7	2902	2908	27	QE	0.877064	0.898253	0.710327	0.459565	pretrained
RAKIERARSDEGQLSPATRGAY	4	323290	Acetyl:2H(3)@Any N-term;Acetyl:2H(3)@K	0;3	22	2908	2929	27	QE	0.93969	0.943091	0.784192	0.558864	pretrained
RTNLGPKGTM	2	323546	Acetyl:2H(3)@Any N-term;Acetyl:2H(3)@K	0;7	10	2929	2938	27	QE	0.75587	0.799907	0.590236	0.918662	pretrained
RTNLGPKGTM	1	323551	Acetyl:2H(3)@Any N-term;Acetyl:2H(3)@K	0;7	10	2938	2947	27	QE	0.77567	0.781457	0.571047	0.168082	pretrained
RDCEGRYLAPSGPSGTL	3	323672	Acetyl:2H(3)@Any N-term;Carbamidomethyl@C	0;3	17	2947	2963	27	QE	0.944686	0.949935	0.797703	0.389034	pretrained
RARAEEAEAQKRQAQEEAERL	4	323679	Acetyl:2H(3)@Any N-term;Acetyl:2H(3)@K	0;11	21	2963	2983	27	QE	0.839051	0.86196	0.661526	0.59503	pretrained
RKEEPSNNVKL	2	323740	Acetyl:2H(3)@Any N-term;Acetyl:2H(3)@K;Acetyl:2H(3)@K	0;2;10	11	2983	2993	27	QE	0.980565	0.983353	0.883675	0.592964	pretrained
RKPRHQEGEIFDTEKEKY	3	323830	Acetyl:2H(3)@Any N-term;Acetyl:2H(3)@K;Acetyl:2H(3)@K;Acetyl:2H(3)@K	0;2;15;17	18	2993	3010	27	QE	0.946942	0.952587	0.803177	0.362713	pretrained
RAGVNTVTTL	2	323871	Acetyl:2H(3)@Any N-term	0	10	3010	3019	27	QE	0.951069	0.960692	0.82091	0.640798	pretrained
RKQITMEEL	2	323906	Acetyl:2H(3)@Any N-term;Acetyl:2H(3)@K;Oxidation@M	0;2;6	9	3019	3027	27	QE	0.914055	0.936513	0.771932	0.680352	pretrained
RDLEDSLARERDTSRRLL	5	323928	Acetyl:2H(3)@Any N-term	0	18	3027	3044	27	QE	0.872248	0.879811	0.684662	0.596251	pretrained
REGNQEVPF	2	323938	Acetyl:2H(3)@Any N-term	0	9	3044	3052	27	QE	0.997361	0.997477	0.95477	0.689333	pretrained
REEHIDKVF	2	323958	Acetyl:2H(3)@Any N-term;Acetyl:2H(3)@K	0;7	9	3052	3060	27	QE	0.912141	0.927654	0.756356	0.728556	pretrained
RETQGIEKL	2	324044	Acetyl:2H(3)@Any N-term;Acetyl:2H(3)@K	0;8	9	3060	3068	27	QE	0.815827	0.847468	0.643748	0.420638	pretrained
RKAKKDDQML	2	324112	Acetyl:2H(3)@Any N-term;Acetyl:2H(3)@K;Acetyl:2H(3)@K;Acetyl:2H(3)@K	0;2;4;5	10	3068	3077	27	QE	0.657136	0.756799	0.546476	0.62973	pretrained
RNTNVEDVL	2	324180	Acetyl:2H(3)@Any N-term	0	9	3077	3085	27	QE	0.97246	0.975942	0.860075	0.828079	pretrained
RVQEVAEL	2	324294	Acetyl:2H(3)@Any N-term	0	8	3085	3092	27	QE	0.947954	0.958123	0.81511	0.827313	pretrained
RTDYNASVSVPDSSGPERIL	3	324333	Acetyl:2H(3)@Any N-term	0	20	3092	3111	27	QE	0.914326	0.918783	0.741653	0.278838	pretrained
RKQRLEELKQQQKL	3	324458	Acetyl:2H(3)@Any N-term;Acetyl:2H(3)@K;Acetyl:2H(3)@K;Acetyl:2H(3)@K	0;2;9;13	14	3111	3124	27	QE	0.745447	0.771872	0.561359	0.393964	pretrained
RAKTGGAYGEDLGADY	2	324461	Acetyl:2H(3)@Any N-term;Acetyl:2H(3)@K	0;3	16	3124	3139	27	QE	0.925896	0.937703	0.774104	0.556516	pretrained
RKRESKVPADLL	2	324528	Acetyl:2H(3)@Any N-term;Acetyl:2H(3)@K;Acetyl:2H(3)@K	0;2;6	12	3139	3150	27	QE	0.96807	0.968795	0.840542	0.343622	pretrained
RKRESKVPADLL	3	324539	Acetyl:2H(3)@Any N-term;Acetyl:2H(3)@K;Acetyl:2H(3)@K	0;2;6	12	3150	3161	27	QE	0.986752	0.986995	0.897215	0.90747	pretrained
RRGDIIGVQGNPGKTKKGEL	3	324551	Acetyl:2H(3)@Any N-term;Acetyl:2H(3)@K;Acetyl:2H(3)@K;Acetyl:2H(3)@K	0;14;16;17	20	3161	3180	27	QE	0.527891	0.591373	0.402828	0.0654682	pretrained
RQKAEADKNDKSVKDL	3	324552	Acetyl:2H(3)@Any N-term;Acetyl:2H(3)@K;Acetyl:2H(3)@K;Acetyl:2H(3)@K;Acetyl:2H(3)@K	0;3;8;11;14	16	3180	3195	27	QE	0.836714	0.864617	0.664878	0.404307	pretrained
RTDYNASVSVPDSSGPERIL	3	324598	Acetyl:2H(3)@Any N-term	0	20	3195	3214	27	QE	0.960297	0.962152	0.82429	0.606329	pretrained
RTDYNASVSVPDSSGPERIL	3	324605	Acetyl:2H(3)@Any N-term	0	20	3214	3233	27	QE	0.987734	0.988978	0.905392	0.789679	pretrained
RTDYNASVSVPDSSGPERIL	2	324620	Acetyl:2H(3)@Any N-term	0	20	3233	3252	27	QE	0.8753	0.87881	0.683324	-0.0570471	pretrained
RTDYNASVSVPDSSGPERIL	3	324631	Acetyl:2H(3)@Any N-term	0	20	3252	3271	27	QE	0.969513	0.971458	0.847532	0.626548	pretrained
RVQVQDNEGCPVEAL	2	324692	Acetyl:2H(3)@Any N-term;Carbamidomethyl@C	0;10	15	3271	3285	27	QE	0.942486	0.950389	0.79863	0.652837	pretrained
RVQVQDNEGCPVEAL	3	324715	Acetyl:2H(3)@Any N-term;Carbamidomethyl@C	0;10	15	3285	3299	27	QE	0.773029	0.815547	0.607128	0.414525	pretrained
RVQVQDNEGCPVEAL	2	324745	Acetyl:2H(3)@Any N-term;Carbamidomethyl@C	0;10	15	3299	3313	27	QE	0.171532	0.291379	0.188228	0.406562	pretrained
RAVIVRVL	2	324773	Acetyl:2H(3)@Any N-term	0	8	3313	3320	27	QE	0.901214	0.930052	0.760476	0.710454	pretrained
RKVIDDTNITRL	2	324808	Acetyl:2H(3)@Any N-term;Acetyl:2H(3)@K	0;2	12	3320	3331	27	QE	0.895626	0.913588	0.733399	0.72537	pretrained
RTDYNASVSVPDSSGPERIL	3	324826	Acetyl:2H(3)@Any N-term	0	20	3331	3350	27	QE	0.962179	0.966069	0.833687	0.675338	pretrained
RTDYNASVSVPDSSGPERIL	2	324863	Acetyl:2H(3)@Any N-term	0	20	3350	3369	27	QE	0.889605	0.896541	0.707856	0.07527	pretrained
RKVIDDTNITRL	3	324964	Acetyl:2H(3)@Any N-term;Acetyl:2H(3)@K	0;2	12	3369	3380	27	QE	0.934517	0.949311	0.796436	0.918041	pretrained
RKVIDDTNITRL	3	324980	Acetyl:2H(3)@Any N-term;Acetyl:2H(3)@K	0;2	12	3380	3391	27	QE	0.89912	0.922198	0.747218	0.786892	pretrained
RKVIDDTNITRL	2	324986	Acetyl:2H(3)@Any N-term;Acetyl:2H(3)@K	0;2	12	3391	3402	27	QE	0.871053	0.892473	0.702064	0.206131	pretrained
RKVIDDTNITRL	2	324987	Acetyl:2H(3)@Any N-term;Acetyl:2H(3)@K	0;2	12	3402	3413	27	QE	0.961838	0.967662	0.837659	0.805567	pretrained
RIESLSSQL	2	325034	Acetyl:2H(3)@Any N-term	0	9	3413	3421	27	QE	0.889901	0.912991	0.732467	0.747617	pretrained
RGVQDIVVGEGTHF	2	325078	Acetyl:2H(3)@Any N-term	0	14	3421	3434	27	QE	0.971092	0.974778	0.856715	0.669555	pretrained
RTNLDESDVQPVKEQL	3	325148	Acetyl:2H(3)@Any N-term;Acetyl:2H(3)@K	0;13	16	3434	3449	27	QE	0.932527	0.938907	0.77632	0.377271	pretrained
RLDVGNF	2	325162	Acetyl:2H(3)@Any N-term	0	7	3449	3455	27	QE	0.990754	0.992328	0.92109	0.99913	pretrained
RFVPSDKSAL	2	325183	Acetyl:2H(3)@Any N-term;Acetyl:2H(3)@K	0;7	10	3455	3464	27	QE	0.942105	0.947259	0.792319	0.773488	pretrained
REANQAINPKLL	2	325278	Acetyl:2H(3)@Any N-term;Acetyl:2H(3)@K	0;10	12	3464	3475	27	QE	0.961962	0.964942	0.830931	0.585271	pretrained
REANQAINPKLL	2	325289	Acetyl:2H(3)@Any N-term;Acetyl:2H(3)@K	0;10	12	3475	3486	27	QE	0.961821	0.96572	0.832827	0.372657	pretrained
RVDKAAAAAAAL	2	325291	Acetyl:2H(3)@Any N-term;Acetyl:2H(3)@K	0;4	12	3486	3497	27	QE	0.889561	0.914578	0.734954	0.542142	pretrained
RVDKAAAAAAAL	2	325313	Acetyl:2H(3)@Any N-term;Acetyl:2H(3)@K	0;4	12	3497	3508	27	QE	0.752974	0.810703	0.601829	0.420648	pretrained
RRVDIDEFDENKF	2	325348	Acetyl:2H(3)@Any N-term;Acetyl:2H(3)@K	0;12	13	3508	3520	27	QE	0.718347	0.774819	0.564318	0.149153	pretrained
RNVQAEEMVEF	2	325424	Acetyl:2H(3)@Any N-term	0	11	3520	3530	27	QE	0.981585	0.983991	0.885934	0.741463	pretrained
RAPVPASELL	2	325458	Acetyl:2H(3)@Any N-term	0	10	3530	3539	27	QE	0.85939	0.880707	0.685864	0.709524	pretrained
RKEYGGLDVL	2	325484	Acetyl:2H(3)@Any N-term;Acetyl:2H(3)@K	0;2	10	3539	3548	27	QE	0.982564	0.984047	0.886132	0.49897	pretrained
RLDLLEDRSL	2	325597	Acetyl:2H(3)@Any N-term	0	10	3548	3557	27	QE	0.934257	0.955671	0.809736	0.828185	pretrained
RIGNAKGDDALEKRFL	2	325648	Acetyl:2H(3)@Any N-term;Acetyl:2H(3)@K;Acetyl:2H(3)@K	0;6;13	16	3557	3572	27	QE	0.936717	0.945569	0.788987	0.367158	pretrained
RARMQQQLDEYQELL	3	325652	Acetyl:2H(3)@Any N-term	0	15	3572	3586	27	QE	0.925784	0.933265	0.766106	0.680349	pretrained
RIGNAKGDDALEKRFL	3	325657	Acetyl:2H(3)@Any N-term;Acetyl:2H(3)@K;Acetyl:2H(3)@K	0;6;13	16	3586	3601	27	QE	0.846398	0.874421	0.677517	0.450903	pretrained
RVISSIEQKTM	2	325791	Acetyl:2H(3)@Any N-term;Acetyl:2H(3)@K	0;9	11	3601	3611	27	QE	0.893772	0.915697	0.736722	0.792308	pretrained
RERYAKIVEIPF	3	325810	Acetyl:2H(3)@Any N-term;Acetyl:2H(3)@K	0;6	12	3611	3622	27	QE	0.926594	0.931077	0.762259	0.698802	pretrained
RLPLQDVY	2	325811	Acetyl:2H(3)@Any N-term	0	8	3622	3629	27	QE	0.990153	0.991557	0.917215	0.833881	pretrained
RFPGQLNADLRKL	3	325858	Acetyl:2H(3)@Any N-term;Acetyl:2H(3)@K	0;12	13	3629	3641	27	QE	0.775475	0.811795	0.603019	0.73833	pretrained
RFPGQLNADLRKL	3	325878	Acetyl:2H(3)@Any N-term;Acetyl:2H(3)@K	0;12	13	3641	3653	27	QE	0.975646	0.978769	0.868584	0.73985	pretrained
RFPGQLNADLRKL	2	325894	Acetyl:2H(3)@Any N-term;Acetyl:2H(3)@K	0;12	13	3653	3665	27	QE	0.985591	0.985742	0.892366	0.330167	pretrained
RFPGQLNADLRKL	3	325908	Acetyl:2H(3)@Any N-term;Acetyl:2H(3)@K	0;12	13	3665	3677	27	QE	0.983712	0.985281	0.890637	0.687636	pretrained
RLKAKSLL	2	325925	Acetyl:2H(3)@Any N-term;Acetyl:2H(3)@K;Acetyl:2H(3)@K	0;3;5	8	3677	3684	27	QE	0.618573	0.732946	0.523711	0.473727	pretrained
RSGDSEVYQLGDVSQKTTW	3	325953	Acetyl:2H(3)@Any N-term;Acetyl:2H(3)@K	0;16	19	3684	3702	27	QE	0.457627	0.523463	0.350721	-0.100794	pretrained
RSGDSEVYQLGDVSQKTTW	2	325956	Acetyl:2H(3)@Any N-term;Acetyl:2H(3)@K	0;16	19	3702	3720	27	QE	0.786348	0.823678	0.616163	0.285854	pretrained
RKKEPKTLLPHDPTADVF	3	326006	Acetyl:2H(3)@Any N-term;Acetyl:2H(3)@K;Acetyl:2H(3)@K;Acetyl:2H(3)@K	0;2;3;6	18	3720	3737	27	QE	0.764168	0.790713	0.58058	0.4361	pretrained
RKFPAGKVPAF	2	326192	Acetyl:2H(3)@Any N-term;Acetyl:2H(3)@K;Acetyl:2H(3)@K	0;2;7	11	3737	3747	27	QE	0.835098	0.851641	0.648785	0.532927	pretrained
RADEAKQSAEDILL	2	326246	Acetyl:2H(3)@Any N-term;Acetyl:2H(3)@K	0;6	14	3747	3760	27	QE	0.881457	0.898447	0.710607	0.629984	pretrained
RDISPVLKDPASF	2	326291	Acetyl:2H(3)@Any N-term;Acetyl:2H(3)@K	0;8	13	3760	3772	27	QE	0.955927	0.963527	0.827531	0.650782	pretrained
RMTDQEAIQDLW	2	326502	Acetyl:2H(3)@Any N-term	0	12	3772	3783	27	QE	0.89253	0.911572	0.730261	0.616702	pretrained
RKNLVELAEL	2	326504	Acetyl:2H(3)@Any N-term;Acetyl:2H(3)@K	0;2	10	3783	3792	27	QE	0.911751	0.931036	0.762187	0.509781	pretrained
RETGVIEKLL	2	326548	Acetyl:2H(3)@Any N-term;Acetyl:2H(3)@K	0;8	10	3792	3801	27	QE	0.767465	0.803505	0.594068	0.293565	pretrained
RLDLAGRDLTDYLM	2	326588	Acetyl:2H(3)@Any N-term	0	14	3801	3814	27	QE	0.764488	0.784756	0.574424	0.544395	pretrained
RSKVDISQGIPKQVSISF	3	326605	Acetyl:2H(3)@Any N-term;Acetyl:2H(3)@K;Acetyl:2H(3)@K	0;3;12	18	3814	3831	27	QE	0.904155	0.915652	0.736649	0.421728	pretrained
RQKAEADKNDKSVKDLVIL	3	326725	Acetyl:2H(3)@Any N-term;Acetyl:2H(3)@K;Acetyl:2H(3)@K;Acetyl:2H(3)@K;Acetyl:2H(3)@K	0;3;8;11;14	19	3831	3849	27	QE	0.458609	0.531969	0.357096	0.147341	pretrained
RTQTSDPAMLPTMIGL	2	326829	Acetyl:2H(3)@Any N-term	0	16	3849	3864	27	QE	0.992776	0.993093	0.925134	0.537566	pretrained
RAQVERKM	2	327271	Acetyl:2H(3)@Any N-term;Acetyl:2H(3)@K;Oxidation@M	0;7;8	8	3864	3871	27	QE	0.735647	0.819882	0.611922	0.709907	pretrained
RRMEELHNQEM	3	327293	Acetyl:2H(3)@Any N-term;Oxidation@M	0;11	11	3871	3881	27	QE	0.966429	0.971284	0.847066	0.585553	pretrained
RRMEELHNQEM	3	327296	Acetyl:2H(3)@Any N-term;Oxidation@M	0;11	11	3881	3891	27	QE	0.960307	0.966242	0.834112	0.775516	pretrained
RDPNTKRSRGF	3	327352	Acetyl:2H(3)@Any N-term;Acetyl:2H(3)@K	0;6	11	3891	3901	27	QE	0.985253	0.985892	0.892935	0.325234	pretrained
RDPNTKRSRGF	2	327364	Acetyl:2H(3)@Any N-term;Acetyl:2H(3)@K	0;6	11	3901	3911	27	QE	0.955613	0.957784	0.814359	0.734334	pretrained
RDPNTKRSRGF	3	327369	Acetyl:2H(3)@Any N-term;Acetyl:2H(3)@K	0;6	11	3911	3921	27	QE	0.975018	0.976091	0.860509	0.689212	pretrained
RDPNTKRSRGF	3	327370	Acetyl:2H(3)@Any N-term;Acetyl:2H(3)@K	0;6	11	3921	3931	27	QE	0.979647	0.979771	0.871732	0.533771	pretrained
RDPNTKRSRGF	3	327371	Acetyl:2H(3)@Any N-term;Acetyl:2H(3)@K	0;6	11	3931	3941	27	QE	0.982209	0.981727	0.878111	0.504784	pretrained
RDPNTKRSRGF	3	327372	Acetyl:2H(3)@Any N-term;Acetyl:2H(3)@K	0;6	11	3941	3951	27	QE	0.988978	0.988352	0.902737	0.594934	pretrained
RDPNTKRSRGF	3	327374	Acetyl:2H(3)@Any N-term;Acetyl:2H(3)@K	0;6	11	3951	3961	27	QE	0.979733	0.979551	0.871035	0.511726	pretrained
REHANKL	2	327384	Acetyl:2H(3)@Any N-term;Acetyl:2H(3)@K	0;6	7	3961	3967	27	QE	0.775341	0.834037	0.627952	0.766087	pretrained
RDPNTKRSRGF	3	327389	Acetyl:2H(3)@Any N-term;Acetyl:2H(3)@K	0;6	11	3967	3977	27	QE	0.982115	0.983146	0.882955	0.759568	pretrained
RDPQTKRSRGF	3	327391	Acetyl:2H(3)@Any N-term;Acetyl:2H(3)@K	0;6	11	3977	3987	27	QE	0.984973	0.986056	0.893563	0.63546	pretrained
RDPNTKRSRGF	3	327417	Acetyl:2H(3)@Any N-term;Acetyl:2H(3)@K	0;6	11	3987	3997	27	QE	0.959565	0.961479	0.822724	0.37439	pretrained
RGGSDGYGSGRGF	3	327473	Acetyl:2H(3)@Any N-term	0	13	3997	4009	27	QE	0.982996	0.983953	0.885797	0.355949	pretrained
RQKKAHIM	2	327643	Acetyl:2H(3)@Any N-term;Acetyl:2H(3)@K;Acetyl:2H(3)@K;Oxidation@M	0;3;4;8	8	4009	4016	27	QE	0.85235	0.886533	0.693787	0.570608	pretrained
RQIENGESGRERPL	3	327659	Acetyl:2H(3)@Any N-term	0	14	4016	4029	27	QE	0.778485	0.83243	0.626102	0.451379	pretrained
RTACERAKRTL	3	327671	Acetyl:2H(3)@Any N-term;Carbamidomethyl@C;Acetyl:2H(3)@K	0;4;8	11	4029	4039	27	QE	0.702793	0.775397	0.5649	0.5606	pretrained
RSSVQGASSREGSPARSSTPL	3	327685	Acetyl:2H(3)@Any N-term	0	21	4039	4059	27	QE	0.850507	0.863617	0.663612	0.433462	pretrained
RKVQHQDAL	2	327689	Acetyl:2H(3)@Any N-term;Acetyl:2H(3)@K	0;2	9	4059	4067	27	QE	0.840313	0.874333	0.677401	0.60154	pretrained
RKAAAKKD	2	327715	Acetyl:2H(3)@Any N-term;Acetyl:2H(3)@K;Acetyl:2H(3)@K;Acetyl:2H(3)@K	0;2;6;7	8	4067	4074	27	QE	0.950353	0.957048	0.812736	0.426108	pretrained
RGCGPRAAPASSAGASDARL	3	327720	Acetyl:2H(3)@Any N-term;Carbamidomethyl@C	0;3	20	4074	4093	27	QE	0.994584	0.994887	0.935597	0.538551	pretrained
RYKSQDPRNPHNDRF	4	327753	Acetyl:2H(3)@Any N-term;Acetyl:2H(3)@K	0;3	15	4093	4107	27	QE	0.932986	0.93806	0.774758	0.63404	pretrained
RQEVGSHGRDTRGIF	4	327800	Acetyl:2H(3)@Any N-term	0	15	4107	4121	27	QE	0.960191	0.964011	0.828687	0.614696	pretrained
RDLRDSRDF	3	327812	Acetyl:2H(3)@Any N-term	0	9	4121	4129	27	QE	0.829376	0.854705	0.652524	0.730938	pretrained
RAAAGGTRGSNHARIDAAEGPSDIPD	4	327926	Acetyl:2H(3)@Any N-term	0	26	4129	4154	27	QE	0.994181	0.994153	0.931126	0.721074	pretrained
RGEEGRPGKKL	2	327983	Acetyl:2H(3)@Any N-term;Acetyl:2H(3)@K;Acetyl:2H(3)@K	0;9;10	11	4154	4164	27	QE	0.617957	0.7134	0.505691	0.272326	pretrained
RKQQSKKGTSREDQTL	3	328026	Acetyl:2H(3)@Any N-term;Acetyl:2H(3)@K;Acetyl:2H(3)@K;Acetyl:2H(3)@K	0;2;6;7	16	4164	4179	27	QE	0.746574	0.784313	0.573969	0.358238	pretrained
RAEKSITAS	2	328048	Acetyl:2H(3)@Any N-term;Acetyl:2H(3)@K	0;4	9	4179	4187	27	QE	0.845155	0.883688	0.689895	0.60099	pretrained
RRLSDQRSKERSLL	4	328055	Acetyl:2H(3)@Any N-term;Acetyl:2H(3)@K	0;9	14	4187	4200	27	QE	0.874901	0.882638	0.688469	0.438146	pretrained
RRLSDQRSKERSLL	3	328059	Acetyl:2H(3)@Any N-term;Acetyl:2H(3)@K	0;9	14	4200	4213	27	QE	0.821161	0.828557	0.621675	0.158755	pretrained
RCAADAGRPPGEL	2	328114	Acetyl:2H(3)@Any N-term;Carbamidomethyl@C	0;2	13	4213	4225	27	QE	0.983599	0.985795	0.892569	0.618704	pretrained
RFQSSAVM	2	328130	Acetyl:2H(3)@Any N-term;Oxidation@M	0;8	8	4225	4232	27	QE	0.998932	0.999007	0.97163	0.909688	pretrained
RHKNPKTGIY	2	328229	Acetyl:2H(3)@Any N-term;Acetyl:2H(3)@K;Acetyl:2H(3)@K	0;3;6	10	4232	4241	27	QE	0.204367	0.390326	0.255275	0.259331	pretrained
RHKNPKTGIY	2	328233	Acetyl:2H(3)@Any N-term;Acetyl:2H(3)@K;Acetyl:2H(3)@K	0;3;6	10	4241	4250	27	QE	0.847292	0.882368	0.688104	0.346203	pretrained
RRVEEAKRIM	3	328240	Acetyl:2H(3)@Any N-term;Acetyl:2H(3)@K	0;7	10	4250	4259	27	QE	0.757263	0.817042	0.608775	0.392535	pretrained
RQKKAHLM	2	328307	Acetyl:2H(3)@Any N-term;Acetyl:2H(3)@K;Acetyl:2H(3)@K	0;3;4	8	4259	4266	27	QE	0.830483	0.859938	0.658995	0.592228	pretrained
RKKQSDVM	2	328309	Acetyl:2H(3)@Any N-term;Acetyl:2H(3)@K;Acetyl:2H(3)@K	0;2;3	8	4266	4273	27	QE	0.43481	0.557753	0.376673	0.591133	pretrained
RKKQSDVM	1	328322	Acetyl:2H(3)@Any N-term;Acetyl:2H(3)@K;Acetyl:2H(3)@K	0;2;3	8	4273	4280	27	QE	0.966853	0.969249	0.841714	0.715654	pretrained
RKDIRPECREDF	3	328344	Acetyl:2H(3)@Any N-term;Acetyl:2H(3)@K;Carbamidomethyl@C	0;2;8	12	4280	4291	27	QE	0.988045	0.988797	0.904617	0.622903	pretrained
RGMLDTHHKL	3	328512	Acetyl:2H(3)@Any N-term;Acetyl:2H(3)@K	0;9	10	4291	4300	27	QE	0.837646	0.872187	0.674597	0.676834	pretrained
RSLKDRGF	2	328606	Acetyl:2H(3)@Any N-term;Acetyl:2H(3)@K	0;4	8	4300	4307	27	QE	0.733857	0.820667	0.612796	0.701697	pretrained
RSKQAEEEF	1	328629	Acetyl:2H(3)@Any N-term;Acetyl:2H(3)@K	0;3	9	4307	4315	27	QE	0.838247	0.863428	0.663374	0.745418	pretrained
RSKQAEEEF	2	328630	Acetyl:2H(3)@Any N-term;Acetyl:2H(3)@K	0;3	9	4315	4323	27	QE	0.966431	0.973443	0.852955	0.750916	pretrained
RIATRGAEQLAEGGRM	3	328656	Acetyl:2H(3)@Any N-term	0	16	4323	4338	27	QE	0.896992	0.917379	0.739398	0.689053	pretrained
RPKDIRGL	2	328742	Acetyl:2H(3)@Any N-term;Acetyl:2H(3)@K	0;3	8	4338	4345	27	QE	0.898965	0.901563	0.715158	0.706076	pretrained
RKASDSELERQKGL	2	328867	Acetyl:2H(3)@Any N-term;Acetyl:2H(3)@K;Acetyl:2H(3)@K	0;2;12	14	4345	4358	27	QE	0.965846	0.968467	0.839703	0.598993	pretrained
RARDKFEEDRIY	3	328871	Acetyl:2H(3)@Any N-term;Acetyl:2H(3)@K	0;5	12	4358	4369	27	QE	0.694818	0.761863	0.55143	0.546441	pretrained
RKASDSELERQKGL	3	328873	Acetyl:2H(3)@Any N-term;Acetyl:2H(3)@K;Acetyl:2H(3)@K	0;2;12	14	4369	4382	27	QE	0.889384	0.917461	0.739529	0.730342	pretrained
RSINQGLDRL	2	328931	Acetyl:2H(3)@Any N-term	0	10	4382	4391	27	QE	0.856533	0.890337	0.699062	0.458172	pretrained
REDPDPRKVNL	2	328939	Acetyl:2H(3)@Any N-term;Acetyl:2H(3)@K	0;8	11	4391	4401	27	QE	0.984605	0.98567	0.892094	0.462946	pretrained
RQSVENDIHGL	2	328962	Acetyl:2H(3)@Any N-term	0	11	4401	4411	27	QE	0.987611	0.988638	0.903942	0.785835	pretrained
RKGNYAERVGAGAPVYM	2	328969	Acetyl:2H(3)@Any N-term;Acetyl:2H(3)@K;Oxidation@M	0;2;17	17	4411	4427	27	QE	0.800347	0.821717	0.613967	0.499382	pretrained
RRVREEEIEVDSRVADNSF	4	328970	Acetyl:2H(3)@Any N-term	0	19	4427	4445	27	QE	0.941988	0.942888	0.783804	0.302013	pretrained
RREVEKAKRAL	3	329058	Acetyl:2H(3)@Any N-term;Acetyl:2H(3)@K;Acetyl:2H(3)@K	0;6;8	11	4445	4455	27	QE	0.726931	0.777979	0.56751	0.161632	pretrained
RDCEGRYLAPSGPSGTL	3	329068	Acetyl:2H(3)@Any N-term;Carbamidomethyl@C	0;3	17	4455	4471	27	QE	0.959977	0.964221	0.82919	0.526351	pretrained
RREVEKAKRAL	3	329076	Acetyl:2H(3)@Any N-term;Acetyl:2H(3)@K;Acetyl:2H(3)@K	0;6;8	11	4471	4481	27	QE	0.73926	0.784954	0.574627	0.122608	pretrained
RREVEKAKRAL	3	329082	Acetyl:2H(3)@Any N-term;Acetyl:2H(3)@K;Acetyl:2H(3)@K	0;6;8	11	4481	4491	27	QE	0.40988	0.497353	0.331389	0.275422	pretrained
RDCEGRYLAPSGPSGTL	3	329085	Acetyl:2H(3)@Any N-term;Carbamidomethyl@C	0;3	17	4491	4507	27	QE	0.826406	0.845841	0.641801	0.432761	pretrained
RREVEKAKRAL	3	329099	Acetyl:2H(3)@Any N-term;Acetyl:2H(3)@K;Acetyl:2H(3)@K	0;6;8	11	4507	4517	27	QE	0.289665	0.379685	0.247935	0.0557223	pretrained
RDCEGRYLAPSGPSGTL	3	329108	Acetyl:2H(3)@Any N-term;Carbamidomethyl@C	0;3	17	4517	4533	27	QE	0.947093	0.952656	0.803322	0.488416	pretrained
RFQSSAVM	2	329151	Acetyl:2H(3)@Any N-term	0	8	4533	4540	27	QE	0.994451	0.995126	0.937117	0.903941	pretrained
RFQSSAVM	2	329158	Acetyl:2H(3)@Any N-term	0	8	4540	4547	27	QE	0.880505	0.893304	0.703238	0.986316	pretrained
RVHLAEKGDGAEL	2	329256	Acetyl:2H(3)@Any N-term;Acetyl:2H(3)@K	0;7	13	4547	4559	27	QE	0.646276	0.730128	0.521079	0.761452	pretrained
RDCEGRYLAPSGPSGTL	2	329332	Acetyl:2H(3)@Any N-term;Carbamidomethyl@C	0;3	17	4559	4575	27	QE	0.952345	0.956976	0.812579	0.32445	pretrained
RKGNYAERVGAGAPVYM	3	329336	Acetyl:2H(3)@Any N-term;Acetyl:2H(3)@K	0;2	17	4575	4591	27	QE	0.978065	0.979006	0.869322	0.808356	pretrained
RDCEGRYLAPSGPSGTL	3	329338	Acetyl:2H(3)@Any N-term;Carbamidomethyl@C	0;3	17	4591	4607	27	QE	0.921241	0.928443	0.757704	0.344711	pretrained
RYHPDKNKEPGAEEKF	2	329345	Acetyl:2H(3)@Any N-term;Acetyl:2H(3)@K;Acetyl:2H(3)@K;Acetyl:2H(3)@K	0;6;8;15	16	4607	4622	27	QE	0.936141	0.942079	0.782262	0.294776	pretrained
RKAQCPIVERL	2	329347	Acetyl:2H(3)@Any N-term;Acetyl:2H(3)@K;Carbamidomethyl@C	0;2;5	11	4622	4632	27	QE	0.836132	0.884384	0.690842	0.729081	pretrained
RYHPDKNKEPGAEEKF	3	329350	Acetyl:2H(3)@Any N-term;Acetyl:2H(3)@K;Acetyl:2H(3)@K;Acetyl:2H(3)@K	0;6;8;15	16	4632	4647	27	QE	0.569192	0.624555	0.429439	0.234565	pretrained
RYHPDKNKEPGAEEKF	3	329351	Acetyl:2H(3)@Any N-term;Acetyl:2H(3)@K;Acetyl:2H(3)@K;Acetyl:2H(3)@K	0;6;8;15	16	4647	4662	27	QE	0.566362	0.629758	0.433692	0.231787	pretrained
RSPPPGMGL	2	329364	Acetyl:2H(3)@Any N-term	0	9	4662	4670	27	QE	0.680035	0.741899	0.53215	0.439333	pretrained
RKAQCPIVERL	3	329380	Acetyl:2H(3)@Any N-term;Acetyl:2H(3)@K;Carbamidomethyl@C	0;2;5	11	4670	4680	27	QE	0.884227	0.899287	0.711828	0.819794	pretrained
RKAQCPIVERL	2	329411	Acetyl:2H(3)@Any N-term;Acetyl:2H(3)@K;Carbamidomethyl@C	0;2;5	11	4680	4690	27	QE	0.836782	0.883571	0.689735	0.631613	pretrained
RGTLDPVEKAL	2	329434	Acetyl:2H(3)@Any N-term;Acetyl:2H(3)@K	0;9	11	4690	4700	27	QE	0.217167	0.33033	0.21432	0.0183864	pretrained
RAAVPSGASTGIY	2	329455	Acetyl:2H(3)@Any N-term	0	13	4700	4712	27	QE	0.978423	0.981429	0.877118	0.663591	pretrained
RAAVPSGASTGIY	1	329459	Acetyl:2H(3)@Any N-term	0	13	4712	4724	27	QE	0.852197	0.858477	0.657177	0.210649	pretrained
RAAVPSGASTGIY	2	329483	Acetyl:2H(3)@Any N-term	0	13	4724	4736	27	QE	0.890147	0.906412	0.722379	0.157512	pretrained
RKHGLEVIY	2	329490	Acetyl:2H(3)@Any N-term;Acetyl:2H(3)@K	0;2	9	4736	4744	27	QE	0.805575	0.837693	0.632192	0.732038	pretrained
RDPALKRKARREAKVKF	4	329509	Acetyl:2H(3)@Any N-term;Acetyl:2H(3)@K;Acetyl:2H(3)@K;Acetyl:2H(3)@K;Acetyl:2H(3)@K	0;6;8;14;16	17	4744	4760	27	QE	0.89859	0.90288	0.717102	0.53473	pretrained
RDPALKRKARREAKVKF	4	329510	Acetyl:2H(3)@Any N-term;Acetyl:2H(3)@K;Acetyl:2H(3)@K;Acetyl:2H(3)@K;Acetyl:2H(3)@K	0;6;8;14;16	17	4760	4776	27	QE	0.926913	0.930019	0.76042	0.460485	pretrained
RLNNKSAKVRQQAADL	3	329568	Acetyl:2H(3)@Any N-term;Acetyl:2H(3)@K;Acetyl:2H(3)@K	0;5;8	16	4776	4791	27	QE	0.838445	0.865342	0.665798	0.288802	pretrained
RDNIQGITKPAIRRL	3	329658	Acetyl:2H(3)@Any N-term;Acetyl:2H(3)@K	0;9	15	4791	4805	27	QE	0.793066	0.843055	0.63849	0.605024	pretrained
RVAPEEHPVLL	2	329665	Acetyl:2H(3)@Any N-term	0	11	4805	4815	27	QE	0.904035	0.920043	0.743693	0.474953	pretrained
RDNIQGITKPAIRRL	4	329668	Acetyl:2H(3)@Any N-term;Acetyl:2H(3)@K	0;9	15	4815	4829	27	QE	0.987945	0.988602	0.903791	0.892447	pretrained
RDNIQGITKPAIRRL	3	329677	Acetyl:2H(3)@Any N-term;Acetyl:2H(3)@K	0;9	15	4829	4843	27	QE	0.812356	0.857348	0.655779	0.786159	pretrained
RDNIQGITKPAIRRL	3	329691	Acetyl:2H(3)@Any N-term;Acetyl:2H(3)@K	0;9	15	4843	4857	27	QE	0.76826	0.819916	0.611959	0.593917	pretrained
RDNIQGITKPAIRRL	3	329707	Acetyl:2H(3)@Any N-term;Acetyl:2H(3)@K	0;9	15	4857	4871	27	QE	0.763522	0.81894	0.610876	0.681408	pretrained
RDNIQGITKPAIRRL	3	329764	Acetyl:2H(3)@Any N-term;Acetyl:2H(3)@K	0;9	15	4871	4885	27	QE	0.832652	0.872428	0.674912	0.650786	pretrained
RYGDFRADDADEF	3	329782	Acetyl:2H(3)@Any N-term	0	13	4885	4897	27	QE	0.86438	0.87889	0.68343	0.443063	pretrained
RATENDIANF	2	329784	Acetyl:2H(3)@Any N-term	0	10	4897	4906	27	QE	0.988961	0.989832	0.909139	0.748906	pretrained
RKGNYAERVGAGAPVYM	3	329786	Acetyl:2H(3)@Any N-term;Acetyl:2H(3)@K	0;2	17	4906	4922	27	QE	0.967243	0.968494	0.839772	0.632624	pretrained
RKGNYAERVGAGAPVYM	2	329799	Acetyl:2H(3)@Any N-term;Acetyl:2H(3)@K	0;2	17	4922	4938	27	QE	0.696514	0.73394	0.524641	0.458242	pretrained
RKGNYAERVGAGAPVYM	3	329812	Acetyl:2H(3)@Any N-term;Acetyl:2H(3)@K	0;2	17	4938	4954	27	QE	0.782229	0.798924	0.589194	0.525893	pretrained
RDNIQGITKPAIRRL	3	329813	Acetyl:2H(3)@Any N-term;Acetyl:2H(3)@K	0;9	15	4954	4968	27	QE	0.397702	0.497281	0.331337	0.542925	pretrained
RDNIQGITKPAIRRL	2	329816	Acetyl:2H(3)@Any N-term;Acetyl:2H(3)@K	0;9	15	4968	4982	27	QE	0.795286	0.816051	0.607683	0.152051	pretrained
RAQHEDQVEQYKKEL	3	329828	Acetyl:2H(3)@Any N-term;Acetyl:2H(3)@K;Acetyl:2H(3)@K	0;12;13	15	4982	4996	27	QE	0.613915	0.690829	0.485508	0.181476	pretrained
RAQHEDQVEQYKKEL	3	329829	Acetyl:2H(3)@Any N-term;Acetyl:2H(3)@K;Acetyl:2H(3)@K	0;12;13	15	4996	5010	27	QE	0.610063	0.691233	0.485864	0.314901	pretrained
RQMVETEL	2	329830	Acetyl:2H(3)@Any N-term	0	8	5010	5017	27	QE	0.891981	0.913782	0.733703	0.714012	pretrained
RAQHEDQVEQYKKEL	2	329832	Acetyl:2H(3)@Any N-term;Acetyl:2H(3)@K;Acetyl:2H(3)@K	0;12;13	15	5017	5031	27	QE	0.868724	0.901712	0.715378	0.563602	pretrained
RKADIDL	2	329839	Acetyl:2H(3)@Any N-term;Acetyl:2H(3)@K	0;2	7	5031	5037	27	QE	0.978849	0.982995	0.882429	0.776087	pretrained
RKADIDL	1	329843	Acetyl:2H(3)@Any N-term;Acetyl:2H(3)@K	0;2	7	5037	5043	27	QE	0.951361	0.956809	0.812213	0.814348	pretrained
RDICNDVL	2	329852	Acetyl:2H(3)@Any N-term;Carbamidomethyl@C	0;4	8	5043	5050	27	QE	0.993751	0.994419	0.93271	0.598522	pretrained
RDICNDVL	2	329857	Acetyl:2H(3)@Any N-term;Carbamidomethyl@C	0;4	8	5050	5057	27	QE	0.987019	0.98817	0.901978	0.598522	pretrained
RDICNDVL	1	329870	Acetyl:2H(3)@Any N-term;Carbamidomethyl@C	0;4	8	5057	5064	27	QE	0.98751	0.987916	0.900933	0.695129	pretrained
RVAIKDKQEGIE	2	329914	Acetyl:2H(3)@Any N-term;Acetyl:2H(3)@K;Acetyl:2H(3)@K	0;5;7	12	5064	5075	27	QE	0.807725	0.852616	0.64997	0.436505	pretrained
RVKYETEL	2	329918	Acetyl:2H(3)@Any N-term;Acetyl:2H(3)@K	0;3	8	5075	5082	27	QE	0.846046	0.873935	0.67688	0.52162	pretrained
RPDMEEEEAKNL	2	329920	Acetyl:2H(3)@Any N-term;Acetyl:2H(3)@K	0;10	12	5082	5093	27	QE	0.883735	0.904489	0.719494	0.641085	pretrained
RKGNYSERVGAGAPVYL	3	329927	Acetyl:2H(3)@Any N-term;Acetyl:2H(3)@K	0;2	17	5093	5109	27	QE	0.969453	0.971061	0.846472	0.415499	pretrained
RKGNYSERVGAGAPVYL	2	329935	Acetyl:2H(3)@Any N-term;Acetyl:2H(3)@K	0;2	17	5109	5125	27	QE	0.674388	0.711381	0.50386	0.439423	pretrained
RGQDDKIRVVL	2	330098	Acetyl:2H(3)@Any N-term;Acetyl:2H(3)@K	0;6	11	5125	5135	27	QE	0.911683	0.929552	0.759612	0.534428	pretrained
RKVIDDTNITRL	2	330112	Acetyl:2H(3)@Any N-term;Acetyl:2H(3)@K	0;2	12	5135	5146	27	QE	0.93549	0.945876	0.789589	0.581395	pretrained
RKVIDDTNITRL	3	330121	Acetyl:2H(3)@Any N-term;Acetyl:2H(3)@K	0;2	12	5146	5157	27	QE	0.932269	0.94753	0.792857	0.816631	pretrained
REEAIKF	2	330151	Acetyl:2H(3)@Any N-term;Acetyl:2H(3)@K	0;6	7	5157	5163	27	QE	0.789982	0.826768	0.619646	0.882609	pretrained
REEAIKF	1	330155	Acetyl:2H(3)@Any N-term;Acetyl:2H(3)@K	0;6	7	5163	5169	27	QE	0.618864	0.701648	0.495104	0.977391	pretrained
RAVIVRVL	2	330177	Acetyl:2H(3)@Any N-term	0	8	5169	5176	27	QE	0.926788	0.947276	0.792352	0.712096	pretrained
RQAIAERIKPVLM	3	330185	Acetyl:2H(3)@Any N-term;Acetyl:2H(3)@K;Oxidation@M	0;9;13	13	5176	5188	27	QE	0.892686	0.905217	0.720583	0.657675	pretrained
RGQLEALQVDGGRL	2	330235	Acetyl:2H(3)@Any N-term	0	14	5188	5201	27	QE	0.944071	0.946705	0.791222	0.61658	pretrained
RKLLEGEEERL	2	330291	Acetyl:2H(3)@Any N-term;Acetyl:2H(3)@K	0;2	11	5201	5211	27	QE	0.815918	0.863915	0.663989	0.735366	pretrained
RKLLEGEEERL	2	330294	Acetyl:2H(3)@Any N-term;Acetyl:2H(3)@K	0;2	11	5211	5221	27	QE	0.757222	0.822335	0.614658	0.797467	pretrained
RKLLEGEEERL	2	330295	Acetyl:2H(3)@Any N-term;Acetyl:2H(3)@K	0;2	11	5221	5231	27	QE	0.799297	0.851621	0.64876	0.729174	pretrained
RRVDDFKKAF	2	330300	Acetyl:2H(3)@Any N-term;Acetyl:2H(3)@K;Acetyl:2H(3)@K	0;7;8	10	5231	5240	27	QE	0.700689	0.761868	0.551435	0.547233	pretrained
RKLLEGEEERL	2	330304	Acetyl:2H(3)@Any N-term;Acetyl:2H(3)@K	0;2	11	5240	5250	27	QE	0.707121	0.78599	0.575693	0.584334	pretrained
REESGARINISEGNCPERIITL	3	330334	Acetyl:2H(3)@Any N-term;Carbamidomethyl@C	0;15	22	5250	5271	27	QE	0.739542	0.767252	0.556753	0.126638	pretrained
RADYEIASKEQDF	2	330381	Acetyl:2H(3)@Any N-term;Acetyl:2H(3)@K	0;9	13	5271	5283	27	QE	0.846695	0.871346	0.673504	0.684108	pretrained
RKVIDDTNITRL	2	330409	Acetyl:2H(3)@Any N-term;Acetyl:2H(3)@K	0;2	12	5283	5294	27	QE	0.942587	0.951937	0.801822	0.807541	pretrained
RKVIDDTNITRL	3	330413	Acetyl:2H(3)@Any N-term;Acetyl:2H(3)@K	0;2	12	5294	5305	27	QE	0.928732	0.944872	0.787628	0.794433	pretrained
REHVEAIKIGL	2	330423	Acetyl:2H(3)@Any N-term;Acetyl:2H(3)@K	0;8	11	5305	5315	27	QE	0.775549	0.82158	0.613815	0.560507	pretrained
REHVEAIKIGL	2	330424	Acetyl:2H(3)@Any N-term;Acetyl:2H(3)@K	0;8	11	5315	5325	27	QE	0.799014	0.839699	0.634537	0.660319	pretrained
REHVEAIKIGL	3	330433	Acetyl:2H(3)@Any N-term;Acetyl:2H(3)@K	0;8	11	5325	5335	27	QE	0.356526	0.470265	0.311683	0.322795	pretrained
RTVKEEAEKPEREAKEQHQKLW	3	330481	Acetyl:2H(3)@Any N-term;Acetyl:2H(3)@K;Acetyl:2H(3)@K;Acetyl:2H(3)@K;Acetyl:2H(3)@K	0;4;9;15;20	22	5335	5356	27	QE	0.647048	0.689634	0.484457	0.337329	pretrained
RVDKAGSPTLL	2	330595	Acetyl:2H(3)@Any N-term;Acetyl:2H(3)@K	0;4	11	5356	5366	27	QE	0.943532	0.954372	0.806948	0.610788	pretrained
RVDQIIM	2	330749	Acetyl:2H(3)@Any N-term	0	7	5366	5372	27	QE	0.97873	0.982414	0.880431	0.762609	pretrained
REANQAINPKLL	2	330773	Acetyl:2H(3)@Any N-term;Acetyl:2H(3)@K	0;10	12	5372	5383	27	QE	0.946034	0.951356	0.800618	0.46568	pretrained
RQLYEEEIREL	2	330820	Acetyl:2H(3)@Any N-term	0	11	5383	5393	27	QE	0.848171	0.884784	0.691388	0.847936	pretrained
RNTGTEAKIQSTVTQPGGKF	3	330846	Acetyl:2H(3)@Any N-term;Acetyl:2H(3)@K;Acetyl:2H(3)@K	0;8;19	20	5393	5412	27	QE	0.884982	0.895522	0.706395	0.133233	pretrained
RFEIGEGENL	2	330909	Acetyl:2H(3)@Any N-term	0	10	5412	5421	27	QE	0.922061	0.940991	0.780208	0.773359	pretrained
RFEIGEGENL	1	330922	Acetyl:2H(3)@Any N-term	0	10	5421	5430	27	QE	0.89596	0.912481	0.731672	0.394208	pretrained
RQITVNDLPVGRSVDETL	2	330939	Acetyl:2H(3)@Any N-term	0	18	5430	5447	27	QE	0.8839	0.891099	0.700129	0.348093	pretrained
RQITVNDLPVGRSVDETL	3	330944	Acetyl:2H(3)@Any N-term	0	18	5447	5464	27	QE	0.99049	0.990866	0.913891	0.637649	pretrained
RQVEVINF	2	330983	Acetyl:2H(3)@Any N-term	0	8	5464	5471	27	QE	0.986884	0.988926	0.905168	0.592228	pretrained
RKASDSELERQKGLVEDTL	3	331025	Acetyl:2H(3)@Any N-term;Acetyl:2H(3)@K;Acetyl:2H(3)@K	0;2;12	19	5471	5489	27	QE	0.921539	0.931984	0.763848	0.667503	pretrained
RKASDSELERQKGLVEDTL	2	331033	Acetyl:2H(3)@Any N-term;Acetyl:2H(3)@K;Acetyl:2H(3)@K	0;2;12	19	5489	5507	27	QE	0.988892	0.989389	0.907175	0.572111	pretrained
RKASDSELERQKGLVEDTL	3	331035	Acetyl:2H(3)@Any N-term;Acetyl:2H(3)@K;Acetyl:2H(3)@K	0;2;12	19	5507	5525	27	QE	0.891819	0.906605	0.722671	0.571757	pretrained
RKASDSELERQKGLVEDTL	3	331036	Acetyl:2H(3)@Any N-term;Acetyl:2H(3)@K;Acetyl:2H(3)@K	0;2;12	19	5525	5543	27	QE	0.877867	0.894861	0.705451	0.516995	pretrained
RKASDSELERQKGLVEDTL	3	331040	Acetyl:2H(3)@Any N-term;Acetyl:2H(3)@K;Acetyl:2H(3)@K	0;2;12	19	5543	5561	27	QE	0.914734	0.926337	0.75412	0.447794	pretrained
RKVEKIDDF	2	331062	Acetyl:2H(3)@Any N-term;Acetyl:2H(3)@K;Acetyl:2H(3)@K	0;2;5	9	5561	5569	27	QE	0.891465	0.91451	0.734847	0.517045	pretrained
RTLNETELTEL	1	331076	Acetyl:2H(3)@Any N-term	0	11	5569	5579	27	QE	0.911725	0.919872	0.743415	0.363133	pretrained
RKLEAAEDIAY	2	331093	Acetyl:2H(3)@Any N-term;Acetyl:2H(3)@K	0;2	11	5579	5589	27	QE	0.972539	0.975388	0.858464	0.622326	pretrained
RQITVNDLPVGRSVDETL	2	331115	Acetyl:2H(3)@Any N-term	0	18	5589	5606	27	QE	0.987691	0.988615	0.903846	0.338722	pretrained
RQITVNDLPVGRSVDETL	3	331116	Acetyl:2H(3)@Any N-term	0	18	5606	5623	27	QE	0.99273	0.99306	0.924952	0.705043	pretrained
RQITVNDLPVGRSVDETL	3	331129	Acetyl:2H(3)@Any N-term	0	18	5623	5640	27	QE	0.916063	0.923112	0.748726	0.716952	pretrained
RLMNETTAVAL	2	331162	Acetyl:2H(3)@Any N-term	0	11	5640	5650	27	QE	0.95539	0.961851	0.823587	0.586773	pretrained
RKPGINVASDW	2	331182	Acetyl:2H(3)@Any N-term;Acetyl:2H(3)@K	0;2	11	5650	5660	27	QE	0.963042	0.972083	0.849219	0.788462	pretrained
RELVDRKKDALL	2	331236	Acetyl:2H(3)@Any N-term;Acetyl:2H(3)@K;Acetyl:2H(3)@K	0;7;8	12	5660	5671	27	QE	0.889115	0.901131	0.714523	0.564341	pretrained
RELVDRKKDALL	3	331238	Acetyl:2H(3)@Any N-term;Acetyl:2H(3)@K;Acetyl:2H(3)@K	0;7;8	12	5671	5682	27	QE	0.70042	0.726937	0.518113	0.836293	pretrained
RASFPQGPIGGANRDISIL	2	331279	Acetyl:2H(3)@Any N-term	0	19	5682	5700	27	QE	0.894966	0.899879	0.71269	-0.0125248	pretrained
RSTLEPVEKALRDAKL	3	331303	Acetyl:2H(3)@Any N-term;Acetyl:2H(3)@K;Acetyl:2H(3)@K	0;9;15	16	5700	5715	27	QE	0.853551	0.87104	0.673107	0.467296	pretrained
RSTLEPVEKALRDAKL	2	331307	Acetyl:2H(3)@Any N-term;Acetyl:2H(3)@K;Acetyl:2H(3)@K	0;9;15	16	5715	5730	27	QE	0.839027	0.848316	0.644766	0.368241	pretrained
RKEYGGLDVL	2	331355	Acetyl:2H(3)@Any N-term;Acetyl:2H(3)@K	0;2	10	5730	5739	27	QE	0.977976	0.980825	0.875131	0.405405	pretrained
RIVAPGKGIL	2	331415	Acetyl:2H(3)@Any N-term;Acetyl:2H(3)@K	0;7	10	5739	5748	27	QE	0.828172	0.851807	0.648986	0.687516	pretrained
RGTLDPVEKALRDAKL	2	331466	Acetyl:2H(3)@Any N-term;Acetyl:2H(3)@K;Acetyl:2H(3)@K	0;9;15	16	5748	5763	27	QE	0.950745	0.951814	0.801566	0.154293	pretrained
RGTLDPVEKALRDAKL	3	331471	Acetyl:2H(3)@Any N-term;Acetyl:2H(3)@K;Acetyl:2H(3)@K	0;9;15	16	5763	5778	27	QE	0.944842	0.949255	0.79632	0.510225	pretrained
RSMQDVVEDF	2	331503	Acetyl:2H(3)@Any N-term	0	10	5778	5787	27	QE	0.988997	0.99082	0.913674	0.780952	pretrained
RSMQDVVEDF	1	331506	Acetyl:2H(3)@Any N-term	0	10	5787	5796	27	QE	0.986227	0.986901	0.896845	0.778636	pretrained
RQQLPTFL	2	331524	Acetyl:2H(3)@Any N-term	0	8	5796	5803	27	QE	0.991752	0.993464	0.927172	0.84127	pretrained
RIKAEYEGDGIPTVF	2	331567	Acetyl:2H(3)@Any N-term;Acetyl:2H(3)@K	0;3	15	5803	5817	27	QE	0.941109	0.945838	0.789515	0.420984	pretrained
RSFPQLKL	2	331727	Acetyl:2H(3)@Any N-term;Acetyl:2H(3)@K	0;7	8	5817	5824	27	QE	0.855135	0.883243	0.689289	0.454023	pretrained
RQKAEADKNDKAVKDLVVL	3	331864	Acetyl:2H(3)@Any N-term;Acetyl:2H(3)@K;Acetyl:2H(3)@K;Acetyl:2H(3)@K;Acetyl:2H(3)@K	0;3;8;11;14	19	5824	5842	27	QE	0.542271	0.614269	0.421098	0.240996	pretrained
RLGDAVEQGVINNTVL	3	331898	Acetyl:2H(3)@Any N-term	0	16	5842	5857	27	QE	0.985326	0.985627	0.891934	0.465435	pretrained
RKDDPLTNLNTAF	2	331934	Acetyl:2H(3)@Any N-term;Acetyl:2H(3)@K	0;2	13	5857	5869	27	QE	0.946586	0.955637	0.809662	0.568932	pretrained
RKVGKGSLDPESIF	2	332042	Acetyl:2H(3)@Any N-term;Acetyl:2H(3)@K;Acetyl:2H(3)@K	0;2;5	14	5869	5882	27	QE	0.95212	0.956156	0.810789	0.396653	pretrained
RSEQLPKKDIIKF	2	332072	Acetyl:2H(3)@Any N-term;Acetyl:2H(3)@K;Acetyl:2H(3)@K;Acetyl:2H(3)@K	0;7;8;12	13	5882	5894	27	QE	0.916997	0.930339	0.760975	0.42233	pretrained
RLQTTEESFIPL	2	332085	Acetyl:2H(3)@Any N-term	0	12	5894	5905	27	QE	0.995618	0.995669	0.940728	0.82544	pretrained
REKAPDFLPL	2	332096	Acetyl:2H(3)@Any N-term;Acetyl:2H(3)@K	0;3	10	5905	5914	27	QE	0.986655	0.987106	0.897659	0.419434	pretrained
RIINEPTAAAIAYGLDKKVGAERNVL	3	332126	Acetyl:2H(3)@Any N-term;Acetyl:2H(3)@K;Acetyl:2H(3)@K	0;17;18	26	5914	5939	27	QE	0.768582	0.798555	0.588804	0.148725	pretrained
RKVEDLFL	2	332189	Acetyl:2H(3)@Any N-term;Acetyl:2H(3)@K	0;2	8	5939	5946	27	QE	0.945983	0.953705	0.805531	0.469896	pretrained
RCPEALFQPSFL	2	332302	Acetyl:2H(3)@Any N-term;Carbamidomethyl@C	0;2	12	5946	5957	27	QE	0.958845	0.965139	0.83141	0.992248	pretrained
RCPEAIFQPSFL	2	332312	Acetyl:2H(3)@Any N-term;Carbamidomethyl@C	0;2	12	5957	5968	27	QE	0.96486	0.969899	0.843404	0.880268	pretrained
RCPEAIFQPSFL	2	332315	Acetyl:2H(3)@Any N-term;Carbamidomethyl@C	0;2	12	5968	5979	27	QE	0.966338	0.971431	0.847461	0.937632	pretrained
RCPEAIFQPSFL	2	332319	Acetyl:2H(3)@Any N-term;Carbamidomethyl@C	0;2	12	5979	5990	27	QE	0.961087	0.96701	0.836022	0.93735	pretrained
RKAFEEAEKNAPAIIF	3	332332	Acetyl:2H(3)@Any N-term;Acetyl:2H(3)@K;Acetyl:2H(3)@K	0;2;9	16	5990	6005	27	QE	0.674883	0.718693	0.510518	0.487802	pretrained
RKAFEEAEKNAPAIIF	2	332335	Acetyl:2H(3)@Any N-term;Acetyl:2H(3)@K;Acetyl:2H(3)@K	0;2;9	16	6005	6020	27	QE	0.626721	0.680259	0.476265	0.381828	pretrained
RKAFEEAEKNAPAIIF	3	332340	Acetyl:2H(3)@Any N-term;Acetyl:2H(3)@K;Acetyl:2H(3)@K	0;2;9	16	6020	6035	27	QE	0.779881	0.806556	0.597342	0.446124	pretrained
RDPDEPVLLEEPVVL	2	332342	Acetyl:2H(3)@Any N-term	0	15	6035	6049	27	QE	0.973322	0.977966	0.866113	0.848086	pretrained
RDLINEAMDVKL	2	332394	Acetyl:2H(3)@Any N-term;Acetyl:2H(3)@K	0;11	12	6049	6060	27	QE	0.955178	0.960314	0.820047	0.669838	pretrained
RQIIQQNPSLLPALL	2	332438	Acetyl:2H(3)@Any N-term	0	15	6060	6074	27	QE	0.988041	0.989657	0.90836	0.771907	pretrained
RSLVQEMVGSF	2	332470	Acetyl:2H(3)@Any N-term	0	11	6074	6084	27	QE	0.929198	0.942165	0.782427	0.677486	pretrained
RSQIRSRTPSASNDDQQE	4	332626	Acetyl:2H(3)@Any N-term	0	18	6084	6101	27	QE	0.928482	0.929191	0.75899	0.357159	pretrained
REHPGGTHTKVTQRE	4	332627	Acetyl:2H(3)@Any N-term;Acetyl:2H(3)@K	0;10	15	6101	6115	27	QE	0.894711	0.907091	0.723405	0.563124	pretrained
REHPGGTHTKVTQRE	3	332629	Acetyl:2H(3)@Any N-term;Acetyl:2H(3)@K	0;10	15	6115	6129	27	QE	0.919272	0.931616	0.763202	0.324265	pretrained
RSQIRSRTPSASNDDQQE	3	332742	Acetyl:2H(3)@Any N-term	0	18	6129	6146	27	QE	0.809017	0.822407	0.614738	0.727755	pretrained
RSQIRSRTPSASNDDQQE	3	332757	Acetyl:2H(3)@Any N-term	0	18	6146	6163	27	QE	0.807005	0.820227	0.612306	0.665744	pretrained
RRREQRDPTVHDDVL	4	332826	Acetyl:2H(3)@Any N-term	0	15	6163	6177	27	QE	0.397847	0.444577	0.293292	0.805844	pretrained
RDPNTKRSRGF	3	332835	Acetyl:2H(3)@Any N-term;Acetyl:2H(3)@K	0;6	11	6177	6187	27	QE	0.979349	0.980876	0.875295	0.423077	pretrained
RLHDESNQRTL	3	332841	Acetyl:2H(3)@Any N-term	0	11	6187	6197	27	QE	0.788252	0.846817	0.642968	0.804315	pretrained
RDPQTKRSRGF	3	332842	Acetyl:2H(3)@Any N-term;Acetyl:2H(3)@K	0;6	11	6197	6207	27	QE	0.977364	0.978545	0.867889	0.438368	pretrained
RNPKAK	2	332859	Acetyl:2H(3)@Any N-term;Acetyl:2H(3)@K;Acetyl:2H(3)@K	0;4;6	6	6207	6212	27	QE	0.842296	0.879461	0.684193	0.74812	pretrained
REQHDAQVRL	3	332894	Acetyl:2H(3)@Any N-term	0	10	6212	6221	27	QE	0.842943	0.877328	0.681352	0.744273	pretrained
RDPASKRSRGF	3	332898	Acetyl:2H(3)@Any N-term;Acetyl:2H(3)@K	0;6	11	6221	6231	27	QE	0.989837	0.990657	0.912909	0.579831	pretrained
RDPASKRSRGF	3	332899	Acetyl:2H(3)@Any N-term;Acetyl:2H(3)@K	0;6	11	6231	6241	27	QE	0.976999	0.976972	0.863114	0.77561	pretrained
RDPASKRSRGF	3	332909	Acetyl:2H(3)@Any N-term;Acetyl:2H(3)@K	0;6	11	6241	6251	27	QE	0.990551	0.991046	0.914745	0.662852	pretrained
RDPASKRSRGF	3	332921	Acetyl:2H(3)@Any N-term;Acetyl:2H(3)@K	0;6	11	6251	6261	27	QE	0.978953	0.980966	0.875591	0.553471	pretrained
RDPASKRSRGF	3	332949	Acetyl:2H(3)@Any N-term;Acetyl:2H(3)@K	0;6	11	6261	6271	27	QE	0.944428	0.948998	0.795801	0.374015	pretrained
RCEMEQQNQEY	2	332960	Acetyl:2H(3)@Any N-term;Carbamidomethyl@C;Oxidation@M	0;2;4	11	6271	6281	27	QE	0.895063	0.916303	0.737683	0.411538	pretrained
RKCQGDASRL	2	332961	Acetyl:2H(3)@Any N-term;Acetyl:2H(3)@K;Carbamidomethyl@C	0;2;3	10	6281	6290	27	QE	0.869548	0.881512	0.686947	0.320335	pretrained
RTGNPTGTY	2	333073	Acetyl:2H(3)@Any N-term	0	9	6290	6298	27	QE	0.970481	0.974836	0.85688	0.515213	pretrained
RTACERAKRTL	3	333074	Acetyl:2H(3)@Any N-term;Carbamidomethyl@C;Acetyl:2H(3)@K	0;4;8	11	6298	6308	27	QE	0.835467	0.881022	0.686288	0.836773	pretrained
RTACERAKRTL	3	333085	Acetyl:2H(3)@Any N-term;Carbamidomethyl@C;Acetyl:2H(3)@K	0;4;8	11	6308	6318	27	QE	0.774174	0.839148	0.633892	0.804878	pretrained
RTACERAKRTL	3	333086	Acetyl:2H(3)@Any N-term;Carbamidomethyl@C;Acetyl:2H(3)@K	0;4;8	11	6318	6328	27	QE	0.863559	0.902399	0.716391	0.827204	pretrained
RTACERAKRTL	3	333089	Acetyl:2H(3)@Any N-term;Carbamidomethyl@C;Acetyl:2H(3)@K	0;4;8	11	6328	6338	27	QE	0.843811	0.888556	0.696582	0.749437	pretrained
RTCKHEKL	2	333117	Acetyl:2H(3)@Any N-term;Carbamidomethyl@C;Acetyl:2H(3)@K;Acetyl:2H(3)@K	0;3;4;7	8	6338	6345	27	QE	0.877	0.906616	0.722687	0.599617	pretrained
RSSVQGASSREGSPARSSTPL	3	333120	Acetyl:2H(3)@Any N-term	0	21	6345	6365	27	QE	0.784254	0.797689	0.587888	0.175703	pretrained
RTACERAKRTL	3	333122	Acetyl:2H(3)@Any N-term;Carbamidomethyl@C;Acetyl:2H(3)@K	0;4;8	11	6365	6375	27	QE	0.821524	0.868931	0.670385	0.891932	pretrained
RERYEDSQQEEAQY	3	333125	Acetyl:2H(3)@Any N-term	0	14	6375	6388	27	QE	0.961504	0.965596	0.832525	0.776103	pretrained
RCAARGTKCL	2	333148	Acetyl:2H(3)@Any N-term;Carbamidomethyl@C;Acetyl:2H(3)@K;Carbamidomethyl@C	0;2;8;9	10	6388	6397	27	QE	0.71175	0.759828	0.549434	0.271429	pretrained
RATGKAY	1	333157	Acetyl:2H(3)@Any N-term;Acetyl:2H(3)@K	0;5	7	6397	6403	27	QE	0.379055	0.465536	0.308277	0.281739	pretrained
RESCDSAL	2	333171	Acetyl:2H(3)@Any N-term;Carbamidomethyl@C	0;4	8	6403	6410	27	QE	0.94433	0.955306	0.808949	0.566776	pretrained
RKVRAKETRKRAL	4	333180	Acetyl:2H(3)@Any N-term;Acetyl:2H(3)@K;Acetyl:2H(3)@K;Acetyl:2H(3)@K	0;2;6;10	13	6410	6422	27	QE	0.814299	0.824192	0.616741	0.471939	pretrained
RKAKSNRKL	2	333246	Acetyl:2H(3)@Any N-term;Acetyl:2H(3)@K;Acetyl:2H(3)@K;Acetyl:2H(3)@K	0;2;4;8	9	6422	6430	27	QE	0.58417	0.677381	0.47377	0.466276	pretrained
RQEVGSHGRDTRGIF	4	333250	Acetyl:2H(3)@Any N-term	0	15	6430	6444	27	QE	0.961065	0.964952	0.830955	0.733459	pretrained
RCGKEGHW	2	333255	Acetyl:2H(3)@Any N-term;Carbamidomethyl@C;Acetyl:2H(3)@K	0;2;4	8	6444	6451	27	QE	0.75316	0.806092	0.596843	0.656541	pretrained
RSKQAEEEF	2	333259	Acetyl:2H(3)@Any N-term;Acetyl:2H(3)@K	0;3	9	6451	6459	27	QE	0.976747	0.981551	0.877525	0.61217	pretrained
RQYDGSRNPRIL	3	333266	Acetyl:2H(3)@Any N-term	0	12	6459	6470	27	QE	0.963439	0.967849	0.838132	0.676674	pretrained
RQEVKQNLH	2	333286	Acetyl:2H(3)@Any N-term;Acetyl:2H(3)@K	0;5	9	6470	6478	27	QE	0.988569	0.990109	0.910386	0.493402	pretrained
REIRRYQKSTEL	4	333335	Acetyl:2H(3)@Any N-term;Acetyl:2H(3)@K	0;8	12	6478	6489	27	QE	0.766801	0.780156	0.56972	-0.118746	pretrained
RNADDDRIPRRGAEDDRGPW	5	333393	Acetyl:2H(3)@Any N-term	0	20	6489	6508	27	QE	0.927994	0.930315	0.760933	0.751251	pretrained
RECERDYQDDTL	3	333467	Acetyl:2H(3)@Any N-term;Carbamidomethyl@C	0;3	12	6508	6519	27	QE	0.880176	0.889116	0.697359	0.0977449	pretrained
RRLSDQRSKERSLL	3	333472	Acetyl:2H(3)@Any N-term;Acetyl:2H(3)@K	0;9	14	6519	6532	27	QE	0.809413	0.817705	0.609508	0.199565	pretrained
RGHSDLVRCL	3	333493	Acetyl:2H(3)@Any N-term;Carbamidomethyl@C	0;9	10	6532	6541	27	QE	0.870475	0.907946	0.7247	0.690862	pretrained
RDSHGVAQVRF	3	333504	Acetyl:2H(3)@Any N-term	0	11	6541	6551	27	QE	0.879915	0.902267	0.716196	0.636679	pretrained
RGQHVTGSPF	2	333518	Acetyl:2H(3)@Any N-term	0	10	6551	6560	27	QE	0.98056	0.981993	0.879005	0.75444	pretrained
RCEMEQQNQEY	2	333602	Acetyl:2H(3)@Any N-term;Carbamidomethyl@C	0;2	11	6560	6570	27	QE	0.960461	0.967269	0.83667	0.481332	pretrained
RLQAEEAERRL	3	333646	Acetyl:2H(3)@Any N-term	0	11	6570	6580	27	QE	0.698965	0.78547	0.575157	0.650094	pretrained
RDSHGVAQVRF	3	333710	Acetyl:2H(3)@Any N-term	0	11	6580	6590	27	QE	0.850952	0.882414	0.688167	0.570825	pretrained
RVQTEVNREL	2	333740	Acetyl:2H(3)@Any N-term	0	10	6590	6599	27	QE	0.874144	0.91543	0.736299	0.768597	pretrained
RHGLEVSEM	2	333747	Acetyl:2H(3)@Any N-term	0	9	6599	6607	27	QE	0.903986	0.923913	0.750055	0.792339	pretrained
RQEAIDRF	2	333765	Acetyl:2H(3)@Any N-term	0	8	6607	6614	27	QE	0.958435	0.96812	0.838819	0.93514	pretrained
RMERQAASEEKRKL	3	333828	Acetyl:2H(3)@Any N-term;Acetyl:2H(3)@K;Acetyl:2H(3)@K	0;11;13	14	6614	6627	27	QE	0.533583	0.627139	0.431549	0.275805	pretrained
RAFEDEKKARM	3	333851	Acetyl:2H(3)@Any N-term;Acetyl:2H(3)@K;Acetyl:2H(3)@K;Oxidation@M	0;7;8;11	11	6627	6637	27	QE	0.708344	0.763979	0.553513	0.608818	pretrained
RTAPGMGDQSGCY	2	333855	Acetyl:2H(3)@Any N-term;Carbamidomethyl@C	0;12	13	6637	6649	27	QE	0.973556	0.977638	0.865115	0.773231	pretrained
REATKAAREAL	2	333889	Acetyl:2H(3)@Any N-term;Acetyl:2H(3)@K	0;5	11	6649	6659	27	QE	0.554593	0.704668	0.497808	0.105347	pretrained
REHVKEVQQL	2	333899	Acetyl:2H(3)@Any N-term;Acetyl:2H(3)@K	0;5	10	6659	6668	27	QE	0.650017	0.747175	0.53718	0.741956	pretrained
RRVHKPPKVQEKCQL	3	333935	Acetyl:2H(3)@Any N-term;Acetyl:2H(3)@K;Acetyl:2H(3)@K;Acetyl:2H(3)@K;Carbamidomethyl@C	0;5;8;12;13	15	6668	6682	27	QE	0.363033	0.447363	0.295273	0.282741	pretrained
RQKVAEQERTAQQL	2	333979	Acetyl:2H(3)@Any N-term;Acetyl:2H(3)@K	0;3	14	6682	6695	27	QE	0.730276	0.777124	0.566644	0.379834	pretrained
RQKVAEQERTAQQL	3	333980	Acetyl:2H(3)@Any N-term;Acetyl:2H(3)@K	0;3	14	6695	6708	27	QE	0.970984	0.975364	0.858396	0.723384	pretrained
RKAAGKEL	2	334047	Acetyl:2H(3)@Any N-term;Acetyl:2H(3)@K;Acetyl:2H(3)@K	0;2;6	8	6708	6715	27	QE	0.650016	0.727922	0.519027	0.629174	pretrained
RKAAGKEL	1	334051	Acetyl:2H(3)@Any N-term;Acetyl:2H(3)@K;Acetyl:2H(3)@K	0;2;6	8	6715	6722	27	QE	0.716072	0.749387	0.539303	0.277504	pretrained
RAQAEAQQPTF	1	334080	Acetyl:2H(3)@Any N-term	0	11	6722	6732	27	QE	0.835911	0.845015	0.640818	0.189493	pretrained
RAAVATTRGDQESAEANKF	3	334180	Acetyl:2H(3)@Any N-term;Acetyl:2H(3)@K	0;18	19	6732	6750	27	QE	0.952742	0.957587	0.813924	0.517397	pretrained
RKGANEATKTL	2	334202	Acetyl:2H(3)@Any N-term;Acetyl:2H(3)@K;Acetyl:2H(3)@K	0;2;9	11	6750	6760	27	QE	0.856999	0.881831	0.687378	0.523921	pretrained
RKAPEKL	2	334233	Acetyl:2H(3)@Any N-term;Acetyl:2H(3)@K;Acetyl:2H(3)@K	0;2;6	7	6760	6766	27	QE	0.833343	0.868242	0.669499	0.513044	pretrained
RVDLQRGL	2	334260	Acetyl:2H(3)@Any N-term	0	8	6766	6773	27	QE	0.897481	0.924405	0.750875	0.697044	pretrained
RKEAEQEAARRAQAEQAAL	3	334298	Acetyl:2H(3)@Any N-term;Acetyl:2H(3)@K	0;2	19	6773	6791	27	QE	0.8672	0.878725	0.68321	0.627677	pretrained
RIQEKRESPEVL	2	334415	Acetyl:2H(3)@Any N-term;Acetyl:2H(3)@K	0;5	12	6791	6802	27	QE	0.562665	0.639836	0.441996	0.248203	pretrained
RDELRGAQEVGERL	3	334470	Acetyl:2H(3)@Any N-term	0	14	6802	6815	27	QE	0.497465	0.628475	0.432641	0.648596	pretrained
REMEENF	2	334539	Acetyl:2H(3)@Any N-term	0	7	6815	6821	27	QE	0.990353	0.992548	0.92223	0.900435	pretrained
RRLKEQGQAPITPQQGQAL	3	334563	Acetyl:2H(3)@Any N-term;Acetyl:2H(3)@K	0;4	19	6821	6839	27	QE	0.917794	0.92413	0.750418	0.480642	pretrained
RQEKITRTKEEAL	2	334662	Acetyl:2H(3)@Any N-term;Acetyl:2H(3)@K;Acetyl:2H(3)@K	0;4;9	13	6839	6851	27	QE	0.707353	0.745884	0.535945	-0.144214	pretrained
RAKQKEEEEKL	2	334674	Acetyl:2H(3)@Any N-term;Acetyl:2H(3)@K;Acetyl:2H(3)@K;Acetyl:2H(3)@K	0;3;5;10	11	6851	6861	27	QE	0.935345	0.947707	0.793211	0.121951	pretrained
RAFEDEKKARM	2	334705	Acetyl:2H(3)@Any N-term;Acetyl:2H(3)@K;Acetyl:2H(3)@K	0;7;8	11	6861	6871	27	QE	0.867833	0.892121	0.701566	0.648311	pretrained
RAFEDEKKARM	3	334710	Acetyl:2H(3)@Any N-term;Acetyl:2H(3)@K;Acetyl:2H(3)@K	0;7;8	11	6871	6881	27	QE	0.930818	0.943808	0.785568	0.876454	pretrained
RQIAASSQDSVGRVL	3	334733	Acetyl:2H(3)@Any N-term	0	15	6881	6895	27	QE	0.889482	0.911956	0.730857	0.763329	pretrained
RSVVTPARVQF	2	334876	Acetyl:2H(3)@Any N-term	0	11	6895	6905	27	QE	0.827467	0.872455	0.674947	0.640525	pretrained
RKKKQLM	2	334883	Acetyl:2H(3)@Any N-term;Acetyl:2H(3)@K;Acetyl:2H(3)@K;Acetyl:2H(3)@K	0;2;3;4	7	6905	6911	27	QE	0.319884	0.528155	0.354232	0.368696	pretrained
RSLGQNPTEAEL	2	334907	Acetyl:2H(3)@Any N-term	0	12	6911	6922	27	QE	0.978072	0.980492	0.874046	0.685624	pretrained
RELVEPRKQDADSL	2	334927	Acetyl:2H(3)@Any N-term;Acetyl:2H(3)@K	0;8	14	6922	6935	27	QE	0.546805	0.590086	0.401812	0.145821	pretrained
RNLGVQQSQGW	2	335044	Acetyl:2H(3)@Any N-term	0	11	6935	6945	27	QE	0.975542	0.981308	0.876718	0.628424	pretrained
RVAPEEHPVLL	2	335077	Acetyl:2H(3)@Any N-term	0	11	6945	6955	27	QE	0.915598	0.929137	0.758896	0.585835	pretrained
RDNIQGITKPAIRRL	3	335078	Acetyl:2H(3)@Any N-term;Acetyl:2H(3)@K	0;9	15	6955	6969	27	QE	0.833102	0.872813	0.675413	0.599932	pretrained
RTQLVSNL	2	335107	Acetyl:2H(3)@Any N-term	0	8	6969	6976	27	QE	0.949968	0.954167	0.806512	0.748495	pretrained
RDNIQGITKPAIRRL	3	335118	Acetyl:2H(3)@Any N-term;Acetyl:2H(3)@K	0;9	15	6976	6990	27	QE	0.830843	0.870911	0.67294	0.762543	pretrained
RDNIQGITKPAIRRL	3	335131	Acetyl:2H(3)@Any N-term;Acetyl:2H(3)@K	0;9	15	6990	7004	27	QE	0.843002	0.880009	0.684928	0.685817	pretrained
RDNIQGITKPAIRRL	3	335200	Acetyl:2H(3)@Any N-term;Acetyl:2H(3)@K	0;9	15	7004	7018	27	QE	0.41932	0.526647	0.353102	0.439098	pretrained
RDNIQGITKPAIRRL	3	335205	Acetyl:2H(3)@Any N-term;Acetyl:2H(3)@K	0;9	15	7018	7032	27	QE	0.378641	0.49669	0.330903	0.577785	pretrained
RQAVKQVL	2	335214	Acetyl:2H(3)@Any N-term;Acetyl:2H(3)@K	0;5	8	7032	7039	27	QE	0.860244	0.888723	0.696813	0.57827	pretrained
RSYRDQTIVDPF	3	335220	Acetyl:2H(3)@Any N-term	0	12	7039	7050	27	QE	0.991475	0.991225	0.915603	0.661945	pretrained
RKAVAEELAK	2	335233	Acetyl:2H(3)@Any N-term;Acetyl:2H(3)@K;Acetyl:2H(3)@K	0;2;10	10	7050	7059	27	QE	0.948315	0.958102	0.815065	0.503475	pretrained
RVSLDVNHF	2	335243	Acetyl:2H(3)@Any N-term	0	9	7059	7067	27	QE	0.984601	0.986819	0.896521	0.615653	pretrained
RSDEAVKPF	1	335268	Acetyl:2H(3)@Any N-term;Acetyl:2H(3)@K	0;7	9	7067	7075	27	QE	0.908279	0.924261	0.750635	0.77566	pretrained
RDVPAYSQDTF	2	335297	Acetyl:2H(3)@Any N-term	0	11	7075	7085	27	QE	0.964116	0.96978	0.843093	0.744278	pretrained
RKYGKKVQTEVL	2	335314	Acetyl:2H(3)@Any N-term;Acetyl:2H(3)@K;Acetyl:2H(3)@K;Acetyl:2H(3)@K	0;2;5;6	12	7085	7096	27	QE	0.415816	0.548401	0.369527	0.554898	pretrained
RKYGKKVQTEVL	3	335334	Acetyl:2H(3)@Any N-term;Acetyl:2H(3)@K;Acetyl:2H(3)@K;Acetyl:2H(3)@K	0;2;5;6	12	7096	7107	27	QE	0.787617	0.806657	0.597451	0.386681	pretrained
RKKKKKVSGTL	2	335363	Acetyl:2H(3)@Any N-term;Acetyl:2H(3)@K;Acetyl:2H(3)@K;Acetyl:2H(3)@K;Acetyl:2H(3)@K;Acetyl:2H(3)@K	0;2;3;4;5;6	11	7107	7117	27	QE	0.191556	0.381793	0.249387	0.0884615	pretrained
RSTMKPVQKVL	2	335384	Acetyl:2H(3)@Any N-term;Oxidation@M;Acetyl:2H(3)@K;Acetyl:2H(3)@K	0;4;5;9	11	7117	7127	27	QE	0.908764	0.925087	0.752016	0.190619	pretrained
RCDLCQEVL	2	335512	Acetyl:2H(3)@Any N-term;Carbamidomethyl@C;Carbamidomethyl@C	0;2;5	9	7127	7135	27	QE	0.977327	0.980734	0.874834	0.687133	pretrained
RIDPASEAKL	2	335579	Acetyl:2H(3)@Any N-term;Acetyl:2H(3)@K	0;9	10	7135	7144	27	QE	0.844296	0.868786	0.670198	0.481339	pretrained
RKGNYAERVGAGAPVYL	3	335597	Acetyl:2H(3)@Any N-term;Acetyl:2H(3)@K	0;2	17	7144	7160	27	QE	0.984489	0.985272	0.890606	0.68631	pretrained
RKGNYAERVGAGAPVYL	2	335598	Acetyl:2H(3)@Any N-term;Acetyl:2H(3)@K	0;2	17	7160	7176	27	QE	0.605291	0.641195	0.443122	0.19478	pretrained
RKGNYAERVGAGAPVYL	3	335608	Acetyl:2H(3)@Any N-term;Acetyl:2H(3)@K	0;2	17	7176	7192	27	QE	0.960593	0.963136	0.826604	0.711699	pretrained
RKIARDEGGKAFF	3	335643	Acetyl:2H(3)@Any N-term;Acetyl:2H(3)@K;Acetyl:2H(3)@K	0;2;10	13	7192	7204	27	QE	0.921067	0.929748	0.75995	0.622558	pretrained
RKIARDEGGKAFF	2	335644	Acetyl:2H(3)@Any N-term;Acetyl:2H(3)@K;Acetyl:2H(3)@K	0;2;10	13	7204	7216	27	QE	0.34056	0.450925	0.297812	0.307805	pretrained
RGKKKEELL	2	335694	Acetyl:2H(3)@Any N-term;Acetyl:2H(3)@K;Acetyl:2H(3)@K;Acetyl:2H(3)@K	0;3;4;5	9	7216	7224	27	QE	0.11839	0.319593	0.207092	0.444098	pretrained
RQTEEQVNDLKERL	3	335708	Acetyl:2H(3)@Any N-term;Acetyl:2H(3)@K	0;11	14	7224	7237	27	QE	0.985786	0.988324	0.902621	0.620592	pretrained
RGKKKEELL	2	335730	Acetyl:2H(3)@Any N-term;Acetyl:2H(3)@K;Acetyl:2H(3)@K;Acetyl:2H(3)@K	0;3;4;5	9	7237	7245	27	QE	0.104921	0.311646	0.20176	0.392045	pretrained
RCELPKLEKRL	2	335968	Acetyl:2H(3)@Any N-term;Carbamidomethyl@C;Acetyl:2H(3)@K;Acetyl:2H(3)@K	0;2;6;9	11	7245	7255	27	QE	0.841774	0.872293	0.674736	0.73349	pretrained
RAYLEGTCVEW	2	336145	Acetyl:2H(3)@Any N-term;Carbamidomethyl@C	0;8	11	7255	7265	27	QE	0.95052	0.960075	0.819501	0.858724	pretrained
RGVTNDQVDPSVDVL	2	336182	Acetyl:2H(3)@Any N-term	0	15	7265	7279	27	QE	0.974447	0.976285	0.861079	0.514525	pretrained
RGVTNDQVDPSVDVL	2	336183	Acetyl:2H(3)@Any N-term	0	15	7279	7293	27	QE	0.960326	0.963008	0.826301	0.471565	pretrained
RCILQDGRIF	2	336226	Acetyl:2H(3)@Any N-term;Carbamidomethyl@C	0;2	10	7293	7302	27	QE	0.650729	0.713498	0.50578	0.66435	pretrained
RGRTVPVKIDKVRIF	3	336241	Acetyl:2H(3)@Any N-term;Acetyl:2H(3)@K;Acetyl:2H(3)@K	0;8;11	15	7302	7316	27	QE	0.540095	0.611652	0.418989	0.147163	pretrained
RELDDTRASREEILAQAKENEKKL	3	336262	Acetyl:2H(3)@Any N-term;Acetyl:2H(3)@K;Acetyl:2H(3)@K;Acetyl:2H(3)@K	0;18;22;23	24	7316	7339	27	QE	0.920321	0.923103	0.748711	0.398286	pretrained
RIEPGVSVSL	2	336320	Acetyl:2H(3)@Any N-term	0	10	7339	7348	27	QE	0.972693	0.9778	0.865605	0.477477	pretrained
RIEPGVSVSL	1	336327	Acetyl:2H(3)@Any N-term	0	10	7348	7357	27	QE	0.931055	0.934489	0.768286	0.11583	pretrained
RQITVNDLPVGRSVDETL	2	336410	Acetyl:2H(3)@Any N-term	0	18	7357	7374	27	QE	0.992924	0.993451	0.927101	0.338493	pretrained
RLVKPGNQNTQVTEAW	2	336422	Acetyl:2H(3)@Any N-term;Acetyl:2H(3)@K	0;4	16	7374	7389	27	QE	0.97346	0.975833	0.859756	0.401389	pretrained
RQITVNDLPVGRSVDETL	3	336445	Acetyl:2H(3)@Any N-term	0	18	7389	7406	27	QE	0.978245	0.979713	0.871549	0.658911	pretrained
RIINEPTAAAIAY	2	336451	Acetyl:2H(3)@Any N-term	0	13	7406	7418	27	QE	0.976125	0.980327	0.873514	0.675152	pretrained
RIINEPTAAAIAY	1	336457	Acetyl:2H(3)@Any N-term	0	13	7418	7430	27	QE	0.92893	0.929545	0.759601	0.160986	pretrained
RQITVNDLPVGRSVDEAL	3	336489	Acetyl:2H(3)@Any N-term	0	18	7430	7447	27	QE	0.955962	0.959034	0.817148	0.558136	pretrained
RAEDGENYDIKKQAEIL	3	336548	Acetyl:2H(3)@Any N-term;Acetyl:2H(3)@K;Acetyl:2H(3)@K	0;11;12	17	7447	7463	27	QE	0.568694	0.620186	0.425885	0.250687	pretrained
RAEDGENYDIKKQAEIL	2	336550	Acetyl:2H(3)@Any N-term;Acetyl:2H(3)@K;Acetyl:2H(3)@K	0;11;12	17	7463	7479	27	QE	0.792387	0.818319	0.610187	0.100298	pretrained
RAEDGENYDIKKQAEIL	3	336555	Acetyl:2H(3)@Any N-term;Acetyl:2H(3)@K;Acetyl:2H(3)@K	0;11;12	17	7479	7495	27	QE	0.591191	0.635703	0.438579	0.115293	pretrained
RAEDGENYDIKKQAEIL	3	336557	Acetyl:2H(3)@Any N-term;Acetyl:2H(3)@K;Acetyl:2H(3)@K	0;11;12	17	7495	7511	27	QE	0.548823	0.605974	0.414433	-0.00201476	pretrained
RKAGTQIENIDEDFRDGL	2	336585	Acetyl:2H(3)@Any N-term;Acetyl:2H(3)@K	0;2	18	7511	7528	27	QE	0.964382	0.965613	0.832565	0.633985	pretrained
RLSTSQTPQQQVELF	2	336601	Acetyl:2H(3)@Any N-term	0	15	7528	7542	27	QE	0.979905	0.982311	0.880082	0.789952	pretrained
RAEDGENYDIKKQAEIL	3	336621	Acetyl:2H(3)@Any N-term;Acetyl:2H(3)@K;Acetyl:2H(3)@K	0;11;12	17	7542	7558	27	QE	0.560102	0.618543	0.424554	-0.030838	pretrained
RLLDEEEATDNDLRAKF	3	336813	Acetyl:2H(3)@Any N-term;Acetyl:2H(3)@K	0;16	17	7558	7574	27	QE	0.948223	0.956661	0.811888	0.87532	pretrained
RIINEPTAAAIAYGLDRTGKGERNVL	3	336816	Acetyl:2H(3)@Any N-term;Acetyl:2H(3)@K	0;20	26	7574	7599	27	QE	0.872038	0.876814	0.680672	0.259304	pretrained
RIINEPTAAAIAYGLDRTGKGERNVL	4	336820	Acetyl:2H(3)@Any N-term;Acetyl:2H(3)@K	0;20	26	7599	7624	27	QE	0.925679	0.934966	0.769141	0.74474	pretrained
RRLAPITSDPTEATAVGAVEASF	2	336833	Acetyl:2H(3)@Any N-term	0	23	7624	7646	27	QE	0.972608	0.973486	0.853075	0.488227	pretrained
RRLAPITSDPTEATAVGAVEASF	3	336835	Acetyl:2H(3)@Any N-term	0	23	7646	7668	27	QE	0.899611	0.911086	0.72951	0.785927	pretrained
RNIKTIAECL	2	336913	Acetyl:2H(3)@Any N-term;Acetyl:2H(3)@K;Carbamidomethyl@C	0;4;9	10	7668	7677	27	QE	0.956727	0.96326	0.826897	0.630373	pretrained
RAPIICVL	2	336965	Acetyl:2H(3)@Any N-term;Carbamidomethyl@C	0;6	8	7677	7684	27	QE	0.970774	0.975271	0.858128	0.821839	pretrained
RETVVEVPQVTW	2	337087	Acetyl:2H(3)@Any N-term	0	12	7684	7695	27	QE	0.475471	0.552225	0.372442	0.245384	pretrained
RSEQLPKKDIIKF	3	337278	Acetyl:2H(3)@Any N-term;Acetyl:2H(3)@K;Acetyl:2H(3)@K;Acetyl:2H(3)@K	0;7;8;12	13	7695	7707	27	QE	0.782393	0.810083	0.601156	-0.24099	pretrained
RSEQLPKKDIIKF	2	337280	Acetyl:2H(3)@Any N-term;Acetyl:2H(3)@K;Acetyl:2H(3)@K;Acetyl:2H(3)@K	0;7;8;12	13	7707	7719	27	QE	0.935987	0.945798	0.789437	0.32398	pretrained
RKAQRNNEDISIIPPLF	3	337297	Acetyl:2H(3)@Any N-term;Acetyl:2H(3)@K	0;2	17	7719	7735	27	QE	0.948232	0.951751	0.801436	0.542033	pretrained
RQLLDETSAITL	2	337328	Acetyl:2H(3)@Any N-term	0	12	7735	7746	27	QE	0.982341	0.985128	0.890068	0.763284	pretrained
RALPDMEVVGL	2	337359	Acetyl:2H(3)@Any N-term	0	11	7746	7756	27	QE	0.912876	0.925083	0.752009	0.4894	pretrained
RIINEPTAAAIAYGLDKKVGAERNVL	3	337378	Acetyl:2H(3)@Any N-term;Acetyl:2H(3)@K;Acetyl:2H(3)@K	0;17;18	26	7756	7781	27	QE	0.726709	0.759679	0.549288	0.0456225	pretrained
RKLLEGEESRISLPLPNF	3	337562	Acetyl:2H(3)@Any N-term;Acetyl:2H(3)@K	0;2	18	7781	7798	27	QE	0.937832	0.939498	0.777415	0.559969	pretrained
RTLPLADQIKIL	2	337577	Acetyl:2H(3)@Any N-term;Acetyl:2H(3)@K	0;10	12	7798	7809	27	QE	0.830475	0.86161	0.661087	0.452008	pretrained
RENFIPTIVNF	2	337653	Acetyl:2H(3)@Any N-term	0	11	7809	7819	27	QE	0.964099	0.968283	0.839234	0.539493	pretrained
RHPGASDRPQPTAM	3	338033	Acetyl:2H(3)@Any N-term;Oxidation@M	0;14	14	7819	7832	27	QE	0.91415	0.922522	0.747751	0.192393	pretrained
RERANQKHQGL	3	338089	Acetyl:2H(3)@Any N-term;Acetyl:2H(3)@K	0;7	11	7832	7842	27	QE	0.965527	0.968354	0.839414	0.167167	pretrained
RQEEREQEQRQAL	3	338170	Acetyl:2H(3)@Any N-term	0	13	7842	7854	27	QE	0.812809	0.865942	0.66656	0.545973	pretrained
RRKAERETF	3	338255	Acetyl:2H(3)@Any N-term;Acetyl:2H(3)@K	0;3	9	7854	7862	27	QE	0.847914	0.870983	0.673034	0.369318	pretrained
RGVKDGGRRDSASY	3	338292	Acetyl:2H(3)@Any N-term;Acetyl:2H(3)@K	0;4	14	7862	7875	27	QE	0.913092	0.915464	0.736352	0.379664	pretrained
RTRKEKARAL	3	338370	Acetyl:2H(3)@Any N-term;Acetyl:2H(3)@K;Acetyl:2H(3)@K	0;4;6	10	7875	7884	27	QE	0.678602	0.748145	0.538111	0.199485	pretrained
RGAGTKDRTL	2	338393	Acetyl:2H(3)@Any N-term;Acetyl:2H(3)@K	0;6	10	7884	7893	27	QE	0.590825	0.682494	0.478209	0.361647	pretrained
RNEARKL	2	338397	Acetyl:2H(3)@Any N-term;Acetyl:2H(3)@K	0;6	7	7893	7899	27	QE	0.592396	0.740572	0.530891	0.578261	pretrained
RHRDDERQKVCL	4	338409	Acetyl:2H(3)@Any N-term;Acetyl:2H(3)@K;Carbamidomethyl@C	0;9;11	12	7899	7910	27	QE	0.697481	0.729888	0.520856	0.315011	pretrained
RKKQRPL	2	338433	Acetyl:2H(3)@Any N-term;Acetyl:2H(3)@K;Acetyl:2H(3)@K	0;2;3	7	7910	7916	27	QE	0.910821	0.930025	0.760431	0.552609	pretrained
RRDPSVKRTL	3	338484	Acetyl:2H(3)@Any N-term;Acetyl:2H(3)@K	0;7	10	7916	7925	27	QE	0.939053	0.943093	0.784195	0.473359	pretrained
RTACERAKRTL	3	338494	Acetyl:2H(3)@Any N-term;Carbamidomethyl@C;Acetyl:2H(3)@K	0;4;8	11	7925	7935	27	QE	0.84544	0.885805	0.692787	0.785366	pretrained
RQSQPSREVL	2	338498	Acetyl:2H(3)@Any N-term	0	10	7935	7944	27	QE	0.941468	0.953536	0.805174	0.625483	pretrained
RTACERAKRTL	2	338500	Acetyl:2H(3)@Any N-term;Carbamidomethyl@C;Acetyl:2H(3)@K	0;4;8	11	7944	7954	27	QE	0.924784	0.934242	0.767844	0.710882	pretrained
RIQGQKERRNQKSSL	3	338535	Acetyl:2H(3)@Any N-term;Acetyl:2H(3)@K;Acetyl:2H(3)@K	0;6;12	15	7954	7968	27	QE	0.538239	0.596697	0.407041	0.423855	pretrained
RGNTQKATCM	2	338645	Acetyl:2H(3)@Any N-term;Acetyl:2H(3)@K;Carbamidomethyl@C	0;6;9	10	7968	7977	27	QE	0.834869	0.868785	0.670198	0.273874	pretrained
RDLEDSLARERDTSRRL	5	338748	Acetyl:2H(3)@Any N-term	0	17	7977	7993	27	QE	0.967537	0.969133	0.841414	0.576396	pretrained
RAEDSEREKF	2	338845	Acetyl:2H(3)@Any N-term;Acetyl:2H(3)@K	0;9	10	7993	8002	27	QE	0.875095	0.899123	0.711589	0.737709	pretrained
RKENEAL	2	338886	Acetyl:2H(3)@Any N-term;Acetyl:2H(3)@K	0;2	7	8002	8008	27	QE	0.84262	0.885727	0.692679	0.418696	pretrained
RATGGNRTKTPGPGAQSAL	3	338912	Acetyl:2H(3)@Any N-term;Acetyl:2H(3)@K	0;9	19	8008	8026	27	QE	0.821548	0.842817	0.638209	0.348608	pretrained
RATGGNRTKTPGPGAQSAL	2	338917	Acetyl:2H(3)@Any N-term;Acetyl:2H(3)@K	0;9	19	8026	8044	27	QE	0.945599	0.945585	0.789018	0.276304	pretrained
RTESDTAVRL	2	338964	Acetyl:2H(3)@Any N-term	0	10	8044	8053	27	QE	0.879572	0.897981	0.709932	0.808237	pretrained
RRQVQDESQRKRQAEVEL	4	338969	Acetyl:2H(3)@Any N-term;Acetyl:2H(3)@K	0;11	18	8053	8070	27	QE	0.666674	0.688183	0.483183	0.328167	pretrained
RRQVQDESQRKRQAEVEL	3	338970	Acetyl:2H(3)@Any N-term;Acetyl:2H(3)@K	0;11	18	8070	8087	27	QE	0.588146	0.615368	0.421985	0.307993	pretrained
RQISDGEREEL	2	338976	Acetyl:2H(3)@Any N-term	0	11	8087	8097	27	QE	0.853005	0.8779	0.682112	0.71379	pretrained
RMTTDEGTGGRGF	2	338977	Acetyl:2H(3)@Any N-term	0	13	8097	8109	27	QE	0.940509	0.949133	0.796074	0.625651	pretrained
RSIEKRDTL	2	339097	Acetyl:2H(3)@Any N-term;Acetyl:2H(3)@K	0;5	9	8109	8117	27	QE	0.936014	0.949121	0.79605	0.978372	pretrained
REKESSAVPARSL	2	339105	Acetyl:2H(3)@Any N-term;Acetyl:2H(3)@K	0;3	13	8117	8129	27	QE	0.859473	0.873402	0.676183	0.0116696	pretrained
RTHTGKYW	2	339187	Acetyl:2H(3)@Any N-term;Acetyl:2H(3)@K	0;6	8	8129	8136	27	QE	0.806135	0.850468	0.647363	0.79283	pretrained
RNRTPSDVKEL	2	339188	Acetyl:2H(3)@Any N-term;Acetyl:2H(3)@K	0;9	11	8136	8146	27	QE	0.98043	0.981569	0.877583	0.586022	pretrained
RGTLKGHNGW	2	339356	Acetyl:2H(3)@Any N-term;Acetyl:2H(3)@K	0;5	10	8146	8155	27	QE	0.888376	0.918458	0.74113	0.893694	pretrained
RKGICEY	2	339533	Acetyl:2H(3)@Any N-term;Acetyl:2H(3)@K;Carbamidomethyl@C	0;2;5	7	8155	8161	27	QE	0.967398	0.973897	0.854222	0.456522	pretrained
RKGICEY	1	339534	Acetyl:2H(3)@Any N-term;Acetyl:2H(3)@K;Carbamidomethyl@C	0;2;5	7	8161	8167	27	QE	0.588698	0.658794	0.457866	0.316087	pretrained
RMVVNEGSDGGQSVY	2	339593	Acetyl:2H(3)@Any N-term;Oxidation@M	0;2	15	8167	8181	27	QE	0.769401	0.815699	0.607294	0.666268	pretrained
RDPNGKSKGF	2	339664	Acetyl:2H(3)@Any N-term;Acetyl:2H(3)@K;Acetyl:2H(3)@K	0;6;8	10	8181	8190	27	QE	0.844997	0.879295	0.683971	0.739125	pretrained
RALAEEAKRQRQL	3	339726	Acetyl:2H(3)@Any N-term;Acetyl:2H(3)@K	0;8	13	8190	8202	27	QE	0.809391	0.852006	0.649228	0.725304	pretrained
RALAEEAKRQRQL	3	339729	Acetyl:2H(3)@Any N-term;Acetyl:2H(3)@K	0;8	13	8202	8214	27	QE	0.87553	0.902986	0.71726	0.676183	pretrained
REMEENF	2	339957	Acetyl:2H(3)@Any N-term	0	7	8214	8220	27	QE	0.511488	0.629651	0.433604	0.558261	pretrained
RDIARARENIQKSL	3	339966	Acetyl:2H(3)@Any N-term;Acetyl:2H(3)@K	0;12	14	8220	8233	27	QE	0.832881	0.851714	0.648873	0.717365	pretrained
RDIARARENIQKSL	3	339979	Acetyl:2H(3)@Any N-term;Acetyl:2H(3)@K	0;12	14	8233	8246	27	QE	0.915043	0.924502	0.751037	0.861479	pretrained
RITTRKTPCGEGSKTW	2	340033	Acetyl:2H(3)@Any N-term;Acetyl:2H(3)@K;Carbamidomethyl@C;Acetyl:2H(3)@K	0;6;9;14	16	8246	8261	27	QE	0.49044	0.532596	0.357567	0.210558	pretrained
RTYDRDNSGMIDKNEL	3	340061	Acetyl:2H(3)@Any N-term;Acetyl:2H(3)@K	0;13	16	8261	8276	27	QE	0.947744	0.9521	0.802162	0.418977	pretrained
RLQQLREL	2	340179	Acetyl:2H(3)@Any N-term	0	8	8276	8283	27	QE	0.857291	0.911486	0.730128	0.821292	pretrained
RMKDQCDKCREIL	3	340216	Acetyl:2H(3)@Any N-term;Acetyl:2H(3)@K;Carbamidomethyl@C;Acetyl:2H(3)@K;Carbamidomethyl@C	0;3;6;8;9	13	8283	8295	27	QE	0.702892	0.771814	0.5613	0.739904	pretrained
RMKDQCDKCREIL	2	340217	Acetyl:2H(3)@Any N-term;Acetyl:2H(3)@K;Carbamidomethyl@C;Acetyl:2H(3)@K;Carbamidomethyl@C	0;3;6;8;9	13	8295	8307	27	QE	0.929867	0.93555	0.770191	0.322026	pretrained
RLVPKHEEEAF	2	340286	Acetyl:2H(3)@Any N-term;Acetyl:2H(3)@K	0;5	11	8307	8317	27	QE	0.688994	0.749474	0.539387	0.771388	pretrained
RKKKELEEQRKL	3	340299	Acetyl:2H(3)@Any N-term;Acetyl:2H(3)@K;Acetyl:2H(3)@K;Acetyl:2H(3)@K;Acetyl:2H(3)@K	0;2;3;4;11	12	8317	8328	27	QE	0.727639	0.781901	0.5715	0.473291	pretrained
RKKKELEEQRKL	2	340304	Acetyl:2H(3)@Any N-term;Acetyl:2H(3)@K;Acetyl:2H(3)@K;Acetyl:2H(3)@K;Acetyl:2H(3)@K	0;2;3;4;11	12	8328	8339	27	QE	0.774351	0.813133	0.60448	0.377097	pretrained
RDLLPKQEKRHVL	3	340327	Acetyl:2H(3)@Any N-term;Acetyl:2H(3)@K;Acetyl:2H(3)@K	0;6;9	13	8339	8351	27	QE	0.881644	0.889517	0.697918	0.790979	pretrained
RKAINRKEGICAL	2	340332	Acetyl:2H(3)@Any N-term;Acetyl:2H(3)@K;Acetyl:2H(3)@K;Carbamidomethyl@C	0;2;7;11	13	8351	8363	27	QE	0.620451	0.677825	0.474154	0.372069	pretrained
RKAINRKEGICAL	3	340340	Acetyl:2H(3)@Any N-term;Acetyl:2H(3)@K;Acetyl:2H(3)@K;Carbamidomethyl@C	0;2;7;11	13	8363	8375	27	QE	0.771088	0.805274	0.595964	0.408597	pretrained
RGNLANVIRY	2	340404	Acetyl:2H(3)@Any N-term	0	10	8375	8384	27	QE	0.587326	0.722663	0.514165	0.0435007	pretrained
RLATGSDDNCAAF	2	340410	Acetyl:2H(3)@Any N-term;Carbamidomethyl@C	0;10	13	8384	8396	27	QE	0.903244	0.925416	0.752568	0.662723	pretrained
RMVVNEGSDGGQSVY	2	340417	Acetyl:2H(3)@Any N-term	0	15	8396	8410	27	QE	0.969509	0.974607	0.856229	0.550547	pretrained
RDNIQGITKPAIRRL	3	340469	Acetyl:2H(3)@Any N-term;Acetyl:2H(3)@K	0;9	15	8410	8424	27	QE	0.804649	0.85084	0.647813	0.668011	pretrained
RKERELEEARKKL	3	340487	Acetyl:2H(3)@Any N-term;Acetyl:2H(3)@K;Acetyl:2H(3)@K;Acetyl:2H(3)@K	0;2;11;12	13	8424	8436	27	QE	0.605984	0.693942	0.488255	0.307696	pretrained
RKERELEEARKKL	3	340501	Acetyl:2H(3)@Any N-term;Acetyl:2H(3)@K;Acetyl:2H(3)@K;Acetyl:2H(3)@K	0;2;11;12	13	8436	8448	27	QE	0.0382746	0.187708	0.120212	-0.0681177	pretrained
RDVRQQYESVAAKNL	3	340508	Acetyl:2H(3)@Any N-term;Acetyl:2H(3)@K	0;13	15	8448	8462	27	QE	0.905659	0.908238	0.725145	0.490465	pretrained
RYLMGERL	2	340520	Acetyl:2H(3)@Any N-term	0	8	8462	8469	27	QE	0.770548	0.85453	0.65231	0.775862	pretrained
RATKVTKGAF	2	340600	Acetyl:2H(3)@Any N-term;Acetyl:2H(3)@K;Acetyl:2H(3)@K	0;4;7	10	8469	8478	27	QE	0.792023	0.834475	0.628458	0.392407	pretrained
RGETAVPGAPEAL	2	340625	Acetyl:2H(3)@Any N-term	0	13	8478	8490	27	QE	0.94742	0.952378	0.802741	0.511832	pretrained
RIKKTIQGDEEDLR	2	340711	Acetyl:2H(3)@Any N-term;Acetyl:2H(3)@K;Acetyl:2H(3)@K	0;3;4	14	8490	8503	27	QE	0.992168	0.991128	0.915135	0.573209	pretrained
RCGKKKVW	2	340774	Acetyl:2H(3)@Any N-term;Carbamidomethyl@C;Acetyl:2H(3)@K;Acetyl:2H(3)@K;Acetyl:2H(3)@K	0;2;4;5;6	8	8503	8510	27	QE	0.449305	0.585049	0.39785	0.281609	pretrained
RCGKKKVW	2	340786	Acetyl:2H(3)@Any N-term;Carbamidomethyl@C;Acetyl:2H(3)@K;Acetyl:2H(3)@K;Acetyl:2H(3)@K	0;2;4;5;6	8	8510	8517	27	QE	0.45923	0.581003	0.394679	0.221401	pretrained
REESGARINISEGNCPERIITL	4	340792	Acetyl:2H(3)@Any N-term;Carbamidomethyl@C	0;15	22	8517	8538	27	QE	0.968266	0.970853	0.845917	0.59513	pretrained
RENGKYIPKQSF	2	340816	Acetyl:2H(3)@Any N-term;Acetyl:2H(3)@K;Acetyl:2H(3)@K	0;5;9	12	8538	8549	27	QE	0.885958	0.89531	0.706091	0.0769556	pretrained
REQIKRVKDSEDVPM	2	340871	Acetyl:2H(3)@Any N-term;Acetyl:2H(3)@K;Acetyl:2H(3)@K	0;5;8	15	8549	8563	27	QE	0.948065	0.951078	0.800043	0.388004	pretrained
RIEEEIRVVRL	3	340988	Acetyl:2H(3)@Any N-term	0	11	8563	8573	27	QE	0.760357	0.802149	0.59262	0.496248	pretrained
RDAAPKMYKEEGL	2	341019	Acetyl:2H(3)@Any N-term;Acetyl:2H(3)@K;Acetyl:2H(3)@K	0;6;9	13	8573	8585	27	QE	0.175182	0.304803	0.197182	-0.395571	pretrained
RLTDEQVAL	2	341031	Acetyl:2H(3)@Any N-term	0	9	8585	8593	27	QE	0.926564	0.938541	0.775644	0.44978	pretrained
RNEKEQELDTL	2	341034	Acetyl:2H(3)@Any N-term;Acetyl:2H(3)@K	0;4	11	8593	8603	27	QE	0.949765	0.960773	0.821096	0.570075	pretrained
RGKKKEELL	2	341081	Acetyl:2H(3)@Any N-term;Acetyl:2H(3)@K;Acetyl:2H(3)@K;Acetyl:2H(3)@K	0;3;4;5	9	8603	8611	27	QE	0.142268	0.333862	0.216704	0.388746	pretrained
RDYQDNKADVIL	2	341152	Acetyl:2H(3)@Any N-term;Acetyl:2H(3)@K	0;7	12	8611	8622	27	QE	0.882824	0.898552	0.71076	0.531572	pretrained
RAKESLKEL	2	341241	Acetyl:2H(3)@Any N-term;Acetyl:2H(3)@K;Acetyl:2H(3)@K	0;3;7	9	8622	8630	27	QE	0.755955	0.797965	0.588181	0.499633	pretrained
RGEDKTFYPEEISSM	2	341288	Acetyl:2H(3)@Any N-term;Acetyl:2H(3)@K;Oxidation@M	0;5;15	15	8630	8644	27	QE	0.906439	0.919034	0.742058	0.379289	pretrained
RKVACIGAWHPARVAF	3	341414	Acetyl:2H(3)@Any N-term;Acetyl:2H(3)@K;Carbamidomethyl@C	0;2;5	16	8644	8659	27	QE	0.973858	0.972726	0.850974	0.551042	pretrained
RQTLQEDLL	2	341469	Acetyl:2H(3)@Any N-term	0	9	8659	8667	27	QE	0.974371	0.978457	0.867619	0.802603	pretrained
RDEEVHAGLGELL	2	341507	Acetyl:2H(3)@Any N-term	0	13	8667	8679	27	QE	0.9466	0.95785	0.814505	0.881079	pretrained
RLRSGGTEGLLAEKL	3	341528	Acetyl:2H(3)@Any N-term;Acetyl:2H(3)@K	0;14	15	8679	8693	27	QE	0.939386	0.945065	0.788003	0.429938	pretrained
RFDGQPINETDTPAQL	2	341548	Acetyl:2H(3)@Any N-term	0	16	8693	8708	27	QE	0.968509	0.973233	0.852371	0.483662	pretrained
RFDGQPINETDTPAQL	3	341556	Acetyl:2H(3)@Any N-term	0	16	8708	8723	27	QE	0.754197	0.771159	0.560645	0.0500417	pretrained
RLQDYEEKTKKAEREL	3	341594	Acetyl:2H(3)@Any N-term;Acetyl:2H(3)@K;Acetyl:2H(3)@K;Acetyl:2H(3)@K	0;8;10;11	16	8723	8738	27	QE	0.829375	0.859827	0.658857	0.246763	pretrained
RLQDYEEKTKKAEREL	3	341606	Acetyl:2H(3)@Any N-term;Acetyl:2H(3)@K;Acetyl:2H(3)@K;Acetyl:2H(3)@K	0;8;10;11	16	8738	8753	27	QE	0.810789	0.8423	0.637598	0.24793	pretrained
RLQDYEEKTKKAEREL	3	341607	Acetyl:2H(3)@Any N-term;Acetyl:2H(3)@K;Acetyl:2H(3)@K;Acetyl:2H(3)@K	0;8;10;11	16	8753	8768	27	QE	0.825934	0.85483	0.652678	0.253654	pretrained
RFDGQPINETDTPAQL	2	341609	Acetyl:2H(3)@Any N-term	0	16	8768	8783	27	QE	0.853964	0.876646	0.680449	0.658544	pretrained
RKCLEELQKRF	2	341619	Acetyl:2H(3)@Any N-term;Acetyl:2H(3)@K;Carbamidomethyl@C;Acetyl:2H(3)@K	0;2;3;9	11	8783	8793	27	QE	0.817507	0.875733	0.679243	0.559756	pretrained
RGKLIEAEDNMNCQM	3	341625	Acetyl:2H(3)@Any N-term;Acetyl:2H(3)@K;Carbamidomethyl@C	0;3;13	15	8793	8807	27	QE	0.87039	0.89172	0.701002	0.355024	pretrained
RVVSSIEQKTEGAEKKQQM	3	341682	Acetyl:2H(3)@Any N-term;Acetyl:2H(3)@K;Acetyl:2H(3)@K;Acetyl:2H(3)@K;Oxidation@M	0;9;15;16;19	19	8807	8825	27	QE	0.82623	0.853126	0.650592	0.435735	pretrained
RGTLDPVEKALRDAKL	3	341711	Acetyl:2H(3)@Any N-term;Acetyl:2H(3)@K;Acetyl:2H(3)@K	0;9;15	16	8825	8840	27	QE	0.413285	0.484038	0.321661	0.417283	pretrained
RPALVGVVKEA	2	341718	Acetyl:2H(3)@Any N-term;Acetyl:2H(3)@K	0;9	11	8840	8850	27	QE	0.91926	0.929376	0.759308	0.206942	pretrained
RGTLDPVEKALRDAKL	2	341722	Acetyl:2H(3)@Any N-term;Acetyl:2H(3)@K;Acetyl:2H(3)@K	0;9;15	16	8850	8865	27	QE	0.461593	0.487808	0.324406	0.428508	pretrained
RALLEPELRPEDRIL	3	341727	Acetyl:2H(3)@Any N-term	0	15	8865	8879	27	QE	0.898279	0.917577	0.739716	0.535167	pretrained
RKLNDLIKRARL	3	341838	Acetyl:2H(3)@Any N-term;Acetyl:2H(3)@K;Acetyl:2H(3)@K	0;2;8	12	8879	8890	27	QE	0.763835	0.784952	0.574625	0.71339	pretrained
RIINEPTAAAIAY	2	341849	Acetyl:2H(3)@Any N-term	0	13	8890	8902	27	QE	0.971006	0.976051	0.860392	0.787723	pretrained
RIINEPTAAAIAY	1	341860	Acetyl:2H(3)@Any N-term	0	13	8902	8914	27	QE	0.919353	0.914617	0.735016	0.160606	pretrained
RVPTANVSVVDL	2	342081	Acetyl:2H(3)@Any N-term	0	12	8914	8925	27	QE	0.963773	0.970666	0.845422	0.848485	pretrained
RVPTANVSVVDL	1	342084	Acetyl:2H(3)@Any N-term	0	12	8925	8936	27	QE	0.988166	0.988565	0.903634	0.1926	pretrained
RALQSGQCAGAALDVF	2	342293	Acetyl:2H(3)@Any N-term;Carbamidomethyl@C	0;8	16	8936	8951	27	QE	0.934895	0.9508	0.799472	0.674854	pretrained
RRLAPITSDPTEATAVGAVEASF	3	342304	Acetyl:2H(3)@Any N-term	0	23	8951	8973	27	QE	0.896132	0.908131	0.724981	0.825922	pretrained
RQIPVVGSVL	2	342449	Acetyl:2H(3)@Any N-term	0	10	8973	8982	27	QE	0.980073	0.982814	0.881802	0.653153	pretrained
RLPEGDLGKEIEQKY	2	342453	Acetyl:2H(3)@Any N-term;Acetyl:2H(3)@K;Acetyl:2H(3)@K	0;9;14	15	8982	8996	27	QE	0.947637	0.956944	0.812507	0.571394	pretrained
RLPEGDLGKEIEQKY	3	342455	Acetyl:2H(3)@Any N-term;Acetyl:2H(3)@K;Acetyl:2H(3)@K	0;9;14	15	8996	9010	27	QE	0.851414	0.873855	0.676775	0.154306	pretrained
RVEKLKPVPVAQENQGVF	3	342511	Acetyl:2H(3)@Any N-term;Acetyl:2H(3)@K;Acetyl:2H(3)@K	0;4;6	18	9010	9027	27	QE	0.617967	0.657432	0.456715	0.0786541	pretrained
RVEKLKPVPVAQENQGVF	2	342518	Acetyl:2H(3)@Any N-term;Acetyl:2H(3)@K;Acetyl:2H(3)@K	0;4;6	18	9027	9044	27	QE	0.967734	0.9712	0.846841	0.446063	pretrained
RANAIASLF	2	342589	Acetyl:2H(3)@Any N-term	0	9	9044	9052	27	QE	0.981891	0.985416	0.891142	0.917155	pretrained
RIIDVSTVKEL	2	342669	Acetyl:2H(3)@Any N-term;Acetyl:2H(3)@K	0;9	11	9052	9062	27	QE	0.641297	0.711756	0.5042	0.500281	pretrained
RTIEELQNKIL	2	342776	Acetyl:2H(3)@Any N-term;Acetyl:2H(3)@K	0;9	11	9062	9072	27	QE	0.72717	0.772129	0.561616	0.601032	pretrained
RTIEELQNKIL	2	342779	Acetyl:2H(3)@Any N-term;Acetyl:2H(3)@K	0;9	11	9072	9082	27	QE	0.775732	0.821864	0.614131	0.553377	pretrained
RALEEELAGL	2	342821	Acetyl:2H(3)@Any N-term	0	10	9082	9091	27	QE	0.970831	0.975594	0.859061	0.845174	pretrained
RDNNGVIGLLEPM	2	342881	Acetyl:2H(3)@Any N-term	0	13	9091	9103	27	QE	0.946641	0.951174	0.800243	0.50825	pretrained
RLEGNTVGVEAARVIAKAL	3	343025	Acetyl:2H(3)@Any N-term;Acetyl:2H(3)@K	0;17	19	9103	9121	27	QE	0.653632	0.717645	0.509559	0.538861	pretrained
RFDGALNVDLTEF	2	343051	Acetyl:2H(3)@Any N-term	0	13	9121	9133	27	QE	0.792984	0.819788	0.611818	0.453702	pretrained
RFDGALNVDLTEF	2	343065	Acetyl:2H(3)@Any N-term	0	13	9133	9145	27	QE	0.78337	0.808804	0.599769	0.245115	pretrained
RVDLPATSVVITF	2	343091	Acetyl:2H(3)@Any N-term	0	13	9145	9157	27	QE	0.973955	0.978064	0.866412	0.87576	pretrained
RSIVEEIEDL	2	343225	Acetyl:2H(3)@Any N-term	0	10	9157	9166	27	QE	0.974485	0.978696	0.868357	0.851223	pretrained
RTACERAKRTL	3	343519	Acetyl:2H(3)@Any N-term;Carbamidomethyl@C;Acetyl:2H(3)@K	0;4;8	11	9166	9176	27	QE	0.451227	0.585093	0.397884	0.337148	pretrained
RERANQKHQGL	3	343531	Acetyl:2H(3)@Any N-term;Acetyl:2H(3)@K	0;7	11	9176	9186	27	QE	0.937857	0.941905	0.781933	0.485647	pretrained
RERANQKHQGL	3	343535	Acetyl:2H(3)@Any N-term;Acetyl:2H(3)@K	0;7	11	9186	9196	27	QE	0.903927	0.910215	0.728167	0.330019	pretrained
RTHAPCWGTGGAPAPREPY	3	343558	Acetyl:2H(3)@Any N-term;Carbamidomethyl@C	0;6	19	9196	9214	27	QE	0.208868	0.293458	0.189612	-0.333751	pretrained
RARRQEQEKRSPL	4	343566	Acetyl:2H(3)@Any N-term;Acetyl:2H(3)@K	0;9	13	9214	9226	27	QE	0.781297	0.807286	0.598129	0.20761	pretrained
RKENAHNRQKL	3	343584	Acetyl:2H(3)@Any N-term;Acetyl:2H(3)@K;Acetyl:2H(3)@K	0;2;10	11	9226	9236	27	QE	0.86753	0.88387	0.690142	0.421013	pretrained
RDPNTKRSRGF	3	343676	Acetyl:2H(3)@Any N-term;Acetyl:2H(3)@K	0;6	11	9236	9246	27	QE	0.959161	0.962438	0.824959	0.503096	pretrained
RLQRDQERL	3	343715	Acetyl:2H(3)@Any N-term	0	9	9246	9254	27	QE	0.567811	0.69176	0.486329	0.732405	pretrained
RDPASKRSRGF	3	343753	Acetyl:2H(3)@Any N-term;Acetyl:2H(3)@K	0;6	11	9254	9264	27	QE	0.993217	0.993659	0.928271	0.665009	pretrained
RRQGKGDSPEARAL	3	343755	Acetyl:2H(3)@Any N-term;Acetyl:2H(3)@K	0;5	14	9264	9277	27	QE	0.80006	0.825827	0.618583	0.377956	pretrained
RDERKNPDSQY	2	343767	Acetyl:2H(3)@Any N-term;Acetyl:2H(3)@K	0;5	11	9277	9287	27	QE	0.981514	0.981161	0.876232	0.46576	pretrained
RDKRSAL	1	343781	Acetyl:2H(3)@Any N-term;Acetyl:2H(3)@K	0;3	7	9287	9293	27	QE	0.674035	0.714961	0.507111	0.606087	pretrained
RQSQPSREVL	2	343896	Acetyl:2H(3)@Any N-term	0	10	9293	9302	27	QE	0.934784	0.949862	0.797555	0.699099	pretrained
RTACERAKRTL	3	343898	Acetyl:2H(3)@Any N-term;Carbamidomethyl@C;Acetyl:2H(3)@K	0;4;8	11	9302	9312	27	QE	0.658546	0.757771	0.547423	0.673358	pretrained
RKQKTRTF	2	344032	Acetyl:2H(3)@Any N-term;Acetyl:2H(3)@K;Acetyl:2H(3)@K	0;2;4	8	9312	9319	27	QE	0.732424	0.817563	0.609351	0.68555	pretrained
RDHVTATQL	2	344124	Acetyl:2H(3)@Any N-term	0	9	9319	9327	27	QE	0.857299	0.903917	0.718642	0.783358	pretrained
RKNKRDEHLL	3	344194	Acetyl:2H(3)@Any N-term;Acetyl:2H(3)@K;Acetyl:2H(3)@K	0;2;4	10	9327	9336	27	QE	0.855195	0.866041	0.666686	0.589961	pretrained
RQAKQESTEY	2	344220	Acetyl:2H(3)@Any N-term;Acetyl:2H(3)@K	0;4	10	9336	9345	27	QE	0.947246	0.960979	0.82157	0.821236	pretrained
RNKDEKY	1	344231	Acetyl:2H(3)@Any N-term;Acetyl:2H(3)@K;Acetyl:2H(3)@K	0;3;6	7	9345	9351	27	QE	0.962105	0.964766	0.830504	0.986957	pretrained
RLNQPGTPTRTAV	2	344318	Acetyl:2H(3)@Any N-term	0	13	9351	9363	27	QE	0.92952	0.938129	0.774885	0.302269	pretrained
RGGLGGGYGGASGM	2	344337	Acetyl:2H(3)@Any N-term;Oxidation@M	0;14	14	9363	9376	27	QE	0.963772	0.968719	0.840348	0.291983	pretrained
RATGGNRTKTPGPGAQSAL	3	344389	Acetyl:2H(3)@Any N-term;Acetyl:2H(3)@K	0;9	19	9376	9394	27	QE	0.818568	0.83738	0.631827	0.352048	pretrained
RATGGNRTKTPGPGAQSAL	2	344392	Acetyl:2H(3)@Any N-term;Acetyl:2H(3)@K	0;9	19	9394	9412	27	QE	0.94763	0.947489	0.792776	0.276304	pretrained
RATGGNRTKTPGPGAQSAL	3	344409	Acetyl:2H(3)@Any N-term;Acetyl:2H(3)@K	0;9	19	9412	9430	27	QE	0.716562	0.739121	0.529518	0.422792	pretrained
REEVAAPGAVGGERRSL	3	344445	Acetyl:2H(3)@Any N-term	0	17	9430	9446	27	QE	0.782326	0.820481	0.612589	0.306227	pretrained
RDAIKRREEF	3	344446	Acetyl:2H(3)@Any N-term;Acetyl:2H(3)@K	0;5	10	9446	9455	27	QE	0.907246	0.922799	0.748209	0.802059	pretrained
RDEGLRL	2	344781	Acetyl:2H(3)@Any N-term	0	7	9455	9461	27	QE	0.550923	0.653522	0.453418	0.792174	pretrained
RPETKQEKKQRL	2	344824	Acetyl:2H(3)@Any N-term;Acetyl:2H(3)@K;Acetyl:2H(3)@K;Acetyl:2H(3)@K	0;5;8;9	12	9461	9472	27	QE	0.46459	0.572839	0.388316	0.303735	pretrained
RPETKQEKKQRL	3	344826	Acetyl:2H(3)@Any N-term;Acetyl:2H(3)@K;Acetyl:2H(3)@K;Acetyl:2H(3)@K	0;5;8;9	12	9472	9483	27	QE	0.866705	0.899595	0.712277	0.570261	pretrained
RPETKQEKKQRL	2	344827	Acetyl:2H(3)@Any N-term;Acetyl:2H(3)@K;Acetyl:2H(3)@K;Acetyl:2H(3)@K	0;5;8;9	12	9483	9494	27	QE	0.508359	0.594254	0.405105	0.29852	pretrained
RSKEQAELEAARQRQL	3	345059	Acetyl:2H(3)@Any N-term;Acetyl:2H(3)@K	0;3	16	9494	9509	27	QE	0.691078	0.73817	0.528619	0.363573	pretrained
RNQIQDARKACNDATL	3	345091	Acetyl:2H(3)@Any N-term;Acetyl:2H(3)@K;Carbamidomethyl@C	0;9;11	16	9509	9524	27	QE	0.836447	0.852653	0.650015	0.711475	pretrained
RMPDRPRLGL	3	345189	Acetyl:2H(3)@Any N-term	0	10	9524	9533	27	QE	0.904072	0.927021	0.755278	0.76834	pretrained
RSDEAVKPF	2	345198	Acetyl:2H(3)@Any N-term;Acetyl:2H(3)@K	0;7	9	9533	9541	27	QE	0.958517	0.962416	0.824907	0.811034	pretrained
RIGGKSPDTNY	2	345233	Acetyl:2H(3)@Any N-term;Acetyl:2H(3)@K	0;5	11	9541	9551	27	QE	0.857728	0.88176	0.687283	0.654784	pretrained
RLKQQSEL	2	345324	Acetyl:2H(3)@Any N-term;Acetyl:2H(3)@K	0;3	8	9551	9558	27	QE	0.850652	0.888724	0.696815	0.699507	pretrained
RLKQQSEL	2	345343	Acetyl:2H(3)@Any N-term;Acetyl:2H(3)@K	0;3	8	9558	9565	27	QE	0.882583	0.91519	0.73592	0.602901	pretrained
RDGGVQACF	1	345363	Acetyl:2H(3)@Any N-term;Carbamidomethyl@C	0;8	9	9565	9573	27	QE	0.649514	0.694274	0.488549	0.164773	pretrained
RDGGVQACF	2	345366	Acetyl:2H(3)@Any N-term;Carbamidomethyl@C	0;8	9	9573	9581	27	QE	0.978035	0.982339	0.880175	0.680169	pretrained
RGLQQQNSDW	2	345397	Acetyl:2H(3)@Any N-term	0	10	9581	9590	27	QE	0.966508	0.973324	0.852625	0.612098	pretrained
RREVEKAKRAL	3	345415	Acetyl:2H(3)@Any N-term;Acetyl:2H(3)@K;Acetyl:2H(3)@K	0;6;8	11	9590	9600	27	QE	0.628473	0.696519	0.490538	0.399625	pretrained
RKVKDANL	2	345422	Acetyl:2H(3)@Any N-term;Acetyl:2H(3)@K;Acetyl:2H(3)@K	0;2;4	8	9600	9607	27	QE	0.669284	0.776631	0.566146	0.648057	pretrained
RKVSMDNRLM	2	345481	Acetyl:2H(3)@Any N-term;Acetyl:2H(3)@K	0;2	10	9607	9616	27	QE	0.973282	0.972463	0.850254	0.667568	pretrained
RVNVGAGSHPNKVKVY	3	345510	Acetyl:2H(3)@Any N-term;Acetyl:2H(3)@K;Acetyl:2H(3)@K	0;12;14	16	9616	9631	27	QE	0.821366	0.843006	0.638433	0.621562	pretrained
RVNVGAGSHPNKVKVY	2	345513	Acetyl:2H(3)@Any N-term;Acetyl:2H(3)@K;Acetyl:2H(3)@K	0;12;14	16	9631	9646	27	QE	0.918895	0.928662	0.75808	0.630425	pretrained
RVNVGAGSHPNKVKVY	3	345518	Acetyl:2H(3)@Any N-term;Acetyl:2H(3)@K;Acetyl:2H(3)@K	0;12;14	16	9646	9661	27	QE	0.830431	0.850972	0.647973	0.543595	pretrained
REELREKDRLL	3	345588	Acetyl:2H(3)@Any N-term;Acetyl:2H(3)@K	0;7	11	9661	9671	27	QE	0.587382	0.684089	0.4796	0.265572	pretrained
RQKDYETATL	2	345646	Acetyl:2H(3)@Any N-term;Acetyl:2H(3)@K	0;3	10	9671	9680	27	QE	0.845757	0.878217	0.682534	0.53462	pretrained
RDIAQQL	1	345681	Acetyl:2H(3)@Any N-term	0	7	9680	9686	27	QE	0.790792	0.831701	0.625265	0.716522	pretrained
RDIAQQL	2	345683	Acetyl:2H(3)@Any N-term	0	7	9686	9692	27	QE	0.982717	0.986437	0.89503	0.838696	pretrained
RNETETAEERVAEL	2	345701	Acetyl:2H(3)@Any N-term	0	14	9692	9705	27	QE	0.395425	0.495153	0.329776	0.486084	pretrained
RMKDQCDKCREIL	2	345728	Acetyl:2H(3)@Any N-term;Acetyl:2H(3)@K;Carbamidomethyl@C;Acetyl:2H(3)@K;Carbamidomethyl@C	0;3;6;8;9	13	9705	9717	27	QE	0.938902	0.942216	0.782523	0.289079	pretrained
RAAVPSGASTGIY	2	345757	Acetyl:2H(3)@Any N-term	0	13	9717	9729	27	QE	0.963623	0.96884	0.840658	0.482577	pretrained
RGNLANVIRY	2	345902	Acetyl:2H(3)@Any N-term	0	10	9729	9738	27	QE	0.742843	0.826154	0.618952	0.507722	pretrained
RQLAEEDLAQQRAL	3	345924	Acetyl:2H(3)@Any N-term	0	14	9738	9751	27	QE	0.922794	0.935753	0.770556	0.619227	pretrained
RVAPEEHPVLL	2	345936	Acetyl:2H(3)@Any N-term	0	11	9751	9761	27	QE	0.914536	0.928813	0.758339	0.536304	pretrained
RSVPTSTVF	2	346111	Acetyl:2H(3)@Any N-term	0	9	9761	9769	27	QE	0.954705	0.961877	0.82365	0.868035	pretrained
RQLYEEEIREL	3	346135	Acetyl:2H(3)@Any N-term	0	11	9769	9779	27	QE	0.559668	0.650896	0.451213	0.357974	pretrained
RSVPTSTVF	2	346149	Acetyl:2H(3)@Any N-term	0	9	9779	9787	27	QE	0.972005	0.976734	0.862407	0.919355	pretrained
RSVPTSTVF	1	346150	Acetyl:2H(3)@Any N-term	0	9	9787	9795	27	QE	0.873397	0.896516	0.707821	0.536107	pretrained
RSICTTVL	2	346183	Acetyl:2H(3)@Any N-term;Carbamidomethyl@C	0;4	8	9795	9802	27	QE	0.986629	0.989442	0.907409	0.918719	pretrained
RANIQAVSL	2	346284	Acetyl:2H(3)@Any N-term	0	9	9802	9810	27	QE	0.893424	0.915484	0.736384	0.094025	pretrained
RLEEEVARL	2	346326	Acetyl:2H(3)@Any N-term	0	9	9810	9818	27	QE	0.893041	0.932817	0.765314	0.800587	pretrained
RNSPVNTKNQAVKERAQGVVL	3	346348	Acetyl:2H(3)@Any N-term;Acetyl:2H(3)@K;Acetyl:2H(3)@K	0;8;13	21	9818	9838	27	QE	0.624486	0.689339	0.484198	0.808521	pretrained
RIVDDCGGAF	1	346359	Acetyl:2H(3)@Any N-term;Carbamidomethyl@C	0;6	10	9838	9847	27	QE	0.981948	0.983057	0.882645	0.672329	pretrained
REAPIDKKGNF	2	346378	Acetyl:2H(3)@Any N-term;Acetyl:2H(3)@K;Acetyl:2H(3)@K	0;7;8	11	9847	9857	27	QE	0.87053	0.893449	0.703444	0.588649	pretrained
RHLEPALAF	2	346388	Acetyl:2H(3)@Any N-term	0	9	9857	9865	27	QE	0.92877	0.945091	0.788055	0.994501	pretrained
RDAKLDKAQIHDL	2	346393	Acetyl:2H(3)@Any N-term;Acetyl:2H(3)@K;Acetyl:2H(3)@K	0;4;7	13	9865	9877	27	QE	0.892978	0.910976	0.72934	0.561713	pretrained
RDAKLDKAQIHDL	3	346397	Acetyl:2H(3)@Any N-term;Acetyl:2H(3)@K;Acetyl:2H(3)@K	0;4;7	13	9877	9889	27	QE	0.937154	0.947957	0.793711	0.639112	pretrained
RDAKLDKAQIHDL	2	346401	Acetyl:2H(3)@Any N-term;Acetyl:2H(3)@K;Acetyl:2H(3)@K	0;4;7	13	9889	9901	27	QE	0.882048	0.900509	0.713611	0.167933	pretrained
RDAKLDKAQIHDL	2	346402	Acetyl:2H(3)@Any N-term;Acetyl:2H(3)@K;Acetyl:2H(3)@K	0;4;7	13	9901	9913	27	QE	0.923039	0.936007	0.771017	0.441381	pretrained
RDAKLDKAQIHDL	2	346412	Acetyl:2H(3)@Any N-term;Acetyl:2H(3)@K;Acetyl:2H(3)@K	0;4;7	13	9913	9925	27	QE	0.839706	0.863891	0.663959	-0.119464	pretrained
RKTKAATIL	2	346447	Acetyl:2H(3)@Any N-term;Acetyl:2H(3)@K;Acetyl:2H(3)@K	0;2;4	9	9925	9933	27	QE	0.552849	0.675971	0.472551	0.476906	pretrained
RKMGAPESGLAEY	2	346454	Acetyl:2H(3)@Any N-term;Acetyl:2H(3)@K	0;2	13	9933	9945	27	QE	0.934567	0.944857	0.787598	0.317901	pretrained
RVAKVTGGAASKL	2	346519	Acetyl:2H(3)@Any N-term;Acetyl:2H(3)@K;Acetyl:2H(3)@K	0;4;12	13	9945	9957	27	QE	0.827532	0.857591	0.65608	0.43921	pretrained
RVAKVTGGAASKL	2	346520	Acetyl:2H(3)@Any N-term;Acetyl:2H(3)@K;Acetyl:2H(3)@K	0;4;12	13	9957	9969	27	QE	0.62213	0.665557	0.463612	0.2684	pretrained
RNRIIKNEVKKL	2	346527	Acetyl:2H(3)@Any N-term;Acetyl:2H(3)@K;Acetyl:2H(3)@K;Acetyl:2H(3)@K	0;6;10;11	12	9969	9980	27	QE	0.705864	0.752395	0.542203	0.290416	pretrained
RVAKVTGGAASKL	3	346534	Acetyl:2H(3)@Any N-term;Acetyl:2H(3)@K;Acetyl:2H(3)@K	0;4;12	13	9980	9992	27	QE	0.475955	0.576151	0.390892	-0.00135696	pretrained
RNRIIKNEVKKL	3	346540	Acetyl:2H(3)@Any N-term;Acetyl:2H(3)@K;Acetyl:2H(3)@K;Acetyl:2H(3)@K	0;6;10;11	12	9992	10003	27	QE	0.954145	0.958462	0.815866	0.156871	pretrained
RVAKVTGGAASKL	2	346577	Acetyl:2H(3)@Any N-term;Acetyl:2H(3)@K;Acetyl:2H(3)@K	0;4;12	13	10003	10015	27	QE	0.829838	0.857444	0.655898	0.326802	pretrained
RQKHSQAVEELAEQL	2	346579	Acetyl:2H(3)@Any N-term;Acetyl:2H(3)@K	0;3	15	10015	10029	27	QE	0.907068	0.926595	0.754557	0.650718	pretrained
RQKHSQAVEELAEQL	3	346580	Acetyl:2H(3)@Any N-term;Acetyl:2H(3)@K	0;3	15	10029	10043	27	QE	0.942174	0.947747	0.793291	0.814217	pretrained
RRQVDQLTNDKARVEVERDNLAEDIM	4	346589	Acetyl:2H(3)@Any N-term;Acetyl:2H(3)@K;Oxidation@M	0;11;26	26	10043	10068	27	QE	0.815898	0.820652	0.612779	0.525893	pretrained
RDYPPVLRQAVSL	3	346676	Acetyl:2H(3)@Any N-term	0	13	10068	10080	27	QE	0.839625	0.868823	0.670247	0.349544	pretrained
RENLATVEGNF	2	346728	Acetyl:2H(3)@Any N-term	0	11	10080	10090	27	QE	0.968202	0.974109	0.854818	0.860694	pretrained
RAKESLKEL	2	346764	Acetyl:2H(3)@Any N-term;Acetyl:2H(3)@K;Acetyl:2H(3)@K	0;3;7	9	10090	10098	27	QE	0.622165	0.679747	0.475821	0.499633	pretrained
RIQKDINEL	2	346799	Acetyl:2H(3)@Any N-term;Acetyl:2H(3)@K	0;4	9	10098	10106	27	QE	0.871109	0.894563	0.705026	0.751833	pretrained
RIQKDINEL	1	346808	Acetyl:2H(3)@Any N-term;Acetyl:2H(3)@K	0;4	9	10106	10114	27	QE	0.967546	0.969721	0.84294	0.443365	pretrained
RKKGPTAAQAKSKQAIL	3	346825	Acetyl:2H(3)@Any N-term;Acetyl:2H(3)@K;Acetyl:2H(3)@K;Acetyl:2H(3)@K;Acetyl:2H(3)@K	0;2;3;11;13	17	10114	10130	27	QE	0.328181	0.490551	0.326409	0.0645375	pretrained
RKKGPTAAQAKSKQAIL	2	346835	Acetyl:2H(3)@Any N-term;Acetyl:2H(3)@K;Acetyl:2H(3)@K;Acetyl:2H(3)@K;Acetyl:2H(3)@K	0;2;3;11;13	17	10130	10146	27	QE	0.497857	0.583749	0.39683	-0.01337	pretrained
RKKGPTAAQAKSKQAIL	3	346838	Acetyl:2H(3)@Any N-term;Acetyl:2H(3)@K;Acetyl:2H(3)@K;Acetyl:2H(3)@K;Acetyl:2H(3)@K	0;2;3;11;13	17	10146	10162	27	QE	0.314519	0.475209	0.315255	-0.0524726	pretrained
RRQVDQLTNDKARVEVERDNLAEDIM	4	346877	Acetyl:2H(3)@Any N-term;Acetyl:2H(3)@K	0;11	26	10162	10187	27	QE	0.793531	0.798368	0.588606	0.534389	pretrained
REYQDLL	2	346900	Acetyl:2H(3)@Any N-term	0	7	10187	10193	27	QE	0.994902	0.995458	0.939301	0.899565	pretrained
RVIDLRAEL	2	346913	Acetyl:2H(3)@Any N-term	0	9	10193	10201	27	QE	0.976748	0.977414	0.864438	0.83871	pretrained
REDVISSIRNF	2	347000	Acetyl:2H(3)@Any N-term	0	11	10201	10211	27	QE	0.906492	0.931788	0.763502	0.723827	pretrained
RKLLEGEESRLESGMQNM	3	347007	Acetyl:2H(3)@Any N-term;Acetyl:2H(3)@K;Oxidation@M	0;2;15	18	10211	10228	27	QE	0.948405	0.955943	0.810325	0.835382	pretrained
RDISEDLKSSVG	2	347017	Acetyl:2H(3)@Any N-term;Acetyl:2H(3)@K	0;8	12	10228	10239	27	QE	0.889178	0.899519	0.712166	0.392882	pretrained
RFDGQPINETDTPAQL	2	347078	Acetyl:2H(3)@Any N-term	0	16	10239	10254	27	QE	0.976976	0.980305	0.873443	0.550653	pretrained
RVVSSIEQKTEGAEKKQQM	3	347194	Acetyl:2H(3)@Any N-term;Acetyl:2H(3)@K;Acetyl:2H(3)@K;Acetyl:2H(3)@K;Oxidation@M	0;9;15;16;19	19	10254	10272	27	QE	0.882399	0.901145	0.714544	0.606759	pretrained
RNLQKIIKEREL	2	347224	Acetyl:2H(3)@Any N-term;Acetyl:2H(3)@K;Acetyl:2H(3)@K	0;5;8	12	10272	10283	27	QE	0.802728	0.862175	0.661797	0.631642	pretrained
RPALVGVVKEA	2	347227	Acetyl:2H(3)@Any N-term;Acetyl:2H(3)@K	0;9	11	10283	10293	27	QE	0.778776	0.812462	0.603747	0.414634	pretrained
RQEKITRTKEEALEL	3	347231	Acetyl:2H(3)@Any N-term;Acetyl:2H(3)@K;Acetyl:2H(3)@K	0;4;9	15	10293	10307	27	QE	0.914534	0.922625	0.747921	0.641012	pretrained
REVQAEIGKL	2	347233	Acetyl:2H(3)@Any N-term;Acetyl:2H(3)@K	0;9	10	10307	10316	27	QE	0.879658	0.897823	0.709704	0.477091	pretrained
RGTLDPVEKALRDAKL	3	347275	Acetyl:2H(3)@Any N-term;Acetyl:2H(3)@K;Acetyl:2H(3)@K	0;9;15	16	10316	10331	27	QE	0.30047	0.387132	0.253069	0.302529	pretrained
RLVDSKGFDEY	2	347319	Acetyl:2H(3)@Any N-term;Acetyl:2H(3)@K	0;6	11	10331	10341	27	QE	0.871029	0.896409	0.707666	0.788368	pretrained
RSTLEPVEKALRDAKL	3	347459	Acetyl:2H(3)@Any N-term;Acetyl:2H(3)@K;Acetyl:2H(3)@K	0;9;15	16	10341	10356	27	QE	0.829792	0.850794	0.647757	0.528536	pretrained
RSTLEPVEKALRDAKL	2	347467	Acetyl:2H(3)@Any N-term;Acetyl:2H(3)@K;Acetyl:2H(3)@K	0;9;15	16	10356	10371	27	QE	0.920555	0.926471	0.754347	0.388636	pretrained
RLEVNLQAM	2	347540	Acetyl:2H(3)@Any N-term	0	9	10371	10379	27	QE	0.988513	0.990679	0.913012	0.772361	pretrained
RIGDLQAF	2	347588	Acetyl:2H(3)@Any N-term	0	8	10379	10386	27	QE	0.989659	0.991346	0.916185	0.898741	pretrained
RIGDLQAF	1	347589	Acetyl:2H(3)@Any N-term	0	8	10386	10393	27	QE	0.992216	0.990756	0.913373	-0.0210729	pretrained
RVVSSIEQKTEGAEKKQQM	3	347590	Acetyl:2H(3)@Any N-term;Acetyl:2H(3)@K;Acetyl:2H(3)@K;Acetyl:2H(3)@K	0;9;15;16	19	10393	10411	27	QE	0.917863	0.929511	0.759542	0.411988	pretrained
RVVSSIEQKTEGAEKKQQM	2	347593	Acetyl:2H(3)@Any N-term;Acetyl:2H(3)@K;Acetyl:2H(3)@K;Acetyl:2H(3)@K	0;9;15;16	19	10411	10429	27	QE	0.860374	0.89178	0.701086	0.717233	pretrained
RAKQEQEAKQKLEEDAEM	3	347605	Acetyl:2H(3)@Any N-term;Acetyl:2H(3)@K;Acetyl:2H(3)@K;Acetyl:2H(3)@K	0;3;9;11	18	10429	10446	27	QE	0.716039	0.766876	0.55638	0.223346	pretrained
RAKQEQEAKQKLEEDAEM	2	347607	Acetyl:2H(3)@Any N-term;Acetyl:2H(3)@K;Acetyl:2H(3)@K;Acetyl:2H(3)@K	0;3;9;11	18	10446	10463	27	QE	0.799348	0.828499	0.621609	0.318014	pretrained
RLAKADGIVSKNF	2	347612	Acetyl:2H(3)@Any N-term;Acetyl:2H(3)@K;Acetyl:2H(3)@K	0;4;11	13	10463	10475	27	QE	0.787748	0.823614	0.616092	0.798958	pretrained
RVPTANVSVVDL	2	347622	Acetyl:2H(3)@Any N-term	0	12	10475	10486	27	QE	0.907717	0.926852	0.754993	0.803524	pretrained
RKKQLAEQEELERQMKEL	3	347656	Acetyl:2H(3)@Any N-term;Acetyl:2H(3)@K;Acetyl:2H(3)@K;Acetyl:2H(3)@K	0;2;3;16	18	10486	10503	27	QE	0.63505	0.72809	0.519184	0.475894	pretrained
RKNGIIKTDKVF	2	347727	Acetyl:2H(3)@Any N-term;Acetyl:2H(3)@K;Acetyl:2H(3)@K;Acetyl:2H(3)@K	0;2;7;10	12	10503	10514	27	QE	0.676101	0.727834	0.518946	-0.136857	pretrained
RLAGTQPLEVL	2	347804	Acetyl:2H(3)@Any N-term	0	11	10514	10524	27	QE	0.983205	0.984966	0.889472	0.684428	pretrained
RLIVENL	2	347809	Acetyl:2H(3)@Any N-term	0	7	10524	10530	27	QE	0.987924	0.990416	0.911793	0.996522	pretrained
RAVLGEVKL	2	347851	Acetyl:2H(3)@Any N-term;Acetyl:2H(3)@K	0;8	9	10530	10538	27	QE	0.919559	0.92781	0.756621	0.734971	pretrained
RVGSVLQEGCGKISKL	3	348001	Acetyl:2H(3)@Any N-term;Carbamidomethyl@C;Acetyl:2H(3)@K;Acetyl:2H(3)@K	0;10;12;15	16	10538	10553	27	QE	0.944322	0.950809	0.79949	0.174549	pretrained
RAKEELERQAVDQIKSQEQL	3	348012	Acetyl:2H(3)@Any N-term;Acetyl:2H(3)@K;Acetyl:2H(3)@K	0;3;15	20	10553	10572	27	QE	0.907263	0.917174	0.73907	0.533452	pretrained
RSGKAPILIATDVASRGL	3	348062	Acetyl:2H(3)@Any N-term;Acetyl:2H(3)@K	0;4	18	10572	10589	27	QE	0.939399	0.950618	0.799098	0.52777	pretrained
RSGKAPILIATDVASRGL	2	348063	Acetyl:2H(3)@Any N-term;Acetyl:2H(3)@K	0;4	18	10589	10606	27	QE	0.902737	0.911097	0.729526	0.241383	pretrained
RKLDDAIEDCTNAVKL	2	348078	Acetyl:2H(3)@Any N-term;Acetyl:2H(3)@K;Carbamidomethyl@C;Acetyl:2H(3)@K	0;2;10;15	16	10606	10621	27	QE	0.944442	0.951447	0.800806	0.424451	pretrained
RQKAEADKNDKAVKDLVVL	3	348082	Acetyl:2H(3)@Any N-term;Acetyl:2H(3)@K;Acetyl:2H(3)@K;Acetyl:2H(3)@K;Acetyl:2H(3)@K	0;3;8;11;14	19	10621	10639	27	QE	0.632134	0.684911	0.480318	0.321773	pretrained
RLDLLEDRSLL	2	348102	Acetyl:2H(3)@Any N-term	0	11	10639	10649	27	QE	0.80231	0.86121	0.660585	0.609475	pretrained
RFTQAGSEVSALL	2	348107	Acetyl:2H(3)@Any N-term	0	13	10649	10661	27	QE	0.958534	0.965614	0.832568	0.673578	pretrained
RLKKLQEESDLEL	2	348114	Acetyl:2H(3)@Any N-term;Acetyl:2H(3)@K;Acetyl:2H(3)@K	0;3;4	13	10661	10673	27	QE	0.401448	0.505558	0.337427	0.34911	pretrained
RFTQAGSEVSALL	2	348120	Acetyl:2H(3)@Any N-term	0	13	10673	10685	27	QE	0.969609	0.974787	0.85674	0.815458	pretrained
RGKAAVKDVEEEKFPTQL	3	348145	Acetyl:2H(3)@Any N-term;Acetyl:2H(3)@K;Acetyl:2H(3)@K;Acetyl:2H(3)@K	0;3;7;13	18	10685	10702	27	QE	0.894808	0.909123	0.726493	0.314788	pretrained
RGKAAVKDVEEEKFPTQL	2	348148	Acetyl:2H(3)@Any N-term;Acetyl:2H(3)@K;Acetyl:2H(3)@K;Acetyl:2H(3)@K	0;3;7;13	18	10702	10719	27	QE	0.897994	0.908112	0.724953	0.665057	pretrained
RFDGALNVDLTEF	2	348590	Acetyl:2H(3)@Any N-term	0	13	10719	10731	27	QE	0.801175	0.82398	0.616502	0.469388	pretrained
RLEKEIQDLEKAEL	2	348657	Acetyl:2H(3)@Any N-term;Acetyl:2H(3)@K;Acetyl:2H(3)@K	0;4;11	14	10731	10744	27	QE	0.841842	0.867829	0.66897	0.415991	pretrained
RAPAALPALCDLL	2	348715	Acetyl:2H(3)@Any N-term;Carbamidomethyl@C	0;10	13	10744	10756	27	QE	0.951622	0.957525	0.813787	0.577236	pretrained
RQEEERRRREEEMM	4	348998	Acetyl:2H(3)@Any N-term;Oxidation@M	0;14	14	10756	10769	27	QE	0.511146	0.550584	0.37119	0.636985	pretrained
RQADEEKHKRQM	3	349032	Acetyl:2H(3)@Any N-term;Acetyl:2H(3)@K;Acetyl:2H(3)@K;Oxidation@M	0;7;9;12	12	10769	10780	27	QE	0.973983	0.976813	0.862641	0.817336	pretrained
RTACERAKRTL	3	349037	Acetyl:2H(3)@Any N-term;Carbamidomethyl@C;Acetyl:2H(3)@K	0;4;8	11	10780	10790	27	QE	0.48582	0.628999	0.43307	0.446248	pretrained
RARRQEQEKRSPL	4	349082	Acetyl:2H(3)@Any N-term;Acetyl:2H(3)@K	0;9	13	10790	10802	27	QE	0.744824	0.775822	0.565329	0.216185	pretrained
RKGPSAKRRY	3	349120	Acetyl:2H(3)@Any N-term;Acetyl:2H(3)@K;Acetyl:2H(3)@K	0;2;7	10	10802	10811	27	QE	0.902892	0.916015	0.737226	0.459459	pretrained
RQQRKEHIRESM	4	349130	Acetyl:2H(3)@Any N-term;Acetyl:2H(3)@K	0;5	12	10811	10822	27	QE	0.349508	0.418587	0.274949	0.60148	pretrained
RQQRKEHIRESM	3	349131	Acetyl:2H(3)@Any N-term;Acetyl:2H(3)@K	0;5	12	10822	10833	27	QE	0.693891	0.768556	0.558049	0.590768	pretrained
RQKQAADAEM	2	349157	Acetyl:2H(3)@Any N-term;Acetyl:2H(3)@K;Oxidation@M	0;3;10	10	10833	10842	27	QE	0.95653	0.962995	0.826271	0.799614	pretrained
RKRTEEPDRDERL	4	349200	Acetyl:2H(3)@Any N-term;Acetyl:2H(3)@K	0;2	13	10842	10854	27	QE	0.646367	0.701423	0.494903	0.783489	pretrained
RDGPPLRGSNM	2	349218	Acetyl:2H(3)@Any N-term;Oxidation@M	0;11	11	10854	10864	27	QE	0.934995	0.941862	0.781851	0.749156	pretrained
RRLSDQRSKERSL	4	349260	Acetyl:2H(3)@Any N-term;Acetyl:2H(3)@K	0;9	13	10864	10876	27	QE	0.88698	0.895961	0.707024	0.569963	pretrained
RRAPPESRVSQGKSEKA	3	349285	Acetyl:2H(3)@Any N-term;Acetyl:2H(3)@K;Acetyl:2H(3)@K	0;13;16	17	10876	10892	27	QE	0.796861	0.815302	0.606859	0.37619	pretrained
RAETEQGEQQRQL	2	349297	Acetyl:2H(3)@Any N-term	0	13	10892	10904	27	QE	0.911282	0.932215	0.764253	0.463254	pretrained
RDPASKRSRGF	3	349306	Acetyl:2H(3)@Any N-term;Acetyl:2H(3)@K	0;6	11	10904	10914	27	QE	0.954736	0.956526	0.811592	0.516416	pretrained
RSKGNRDRPW	3	349326	Acetyl:2H(3)@Any N-term;Acetyl:2H(3)@K	0;3	10	10914	10923	27	QE	0.631506	0.727497	0.518633	0.708623	pretrained
RHIDCAHVY	3	349357	Acetyl:2H(3)@Any N-term;Carbamidomethyl@C	0;5	9	10923	10931	27	QE	0.85213	0.888135	0.695999	0.838526	pretrained
RRVEVTRQL	3	349378	Acetyl:2H(3)@Any N-term	0	9	10931	10939	27	QE	0.871408	0.905756	0.721393	0.925953	pretrained
RTACERAKRTL	3	349426	Acetyl:2H(3)@Any N-term;Carbamidomethyl@C;Acetyl:2H(3)@K	0;4;8	11	10939	10949	27	QE	0.829871	0.876426	0.680158	0.836492	pretrained
RAEKDRESL	2	349466	Acetyl:2H(3)@Any N-term;Acetyl:2H(3)@K	0;4	9	10949	10957	27	QE	0.827762	0.879097	0.683707	0.713526	pretrained
RGGSDGYGSGRGF	2	349588	Acetyl:2H(3)@Any N-term	0	13	10957	10969	27	QE	0.962317	0.966938	0.83584	0.591945	pretrained
[truncated: 23,358 more rows]
