# Supplementary material for: Implementing N-terminomics and machine learning to probe in vivo Nt-arginylation
Source: Research Square preprint supplement (doi:10.21203/rs.3.rs-6500900/v1), 2025-05-12
Supplement: Supplementary file 7 [file ecb221429081ab56dd0b891d.xlsx]

## Sheet: Sheet Description
Sheet	Description
Nt-arginylation Sites	LFQ data for the Nt-arginylation sites. LFQ data plus scan counts for Nt-arginylation (Arg) and Unmodified (Free) per each experiments are decribed
Localization	Localization
Mitochondrial Proteins	Description for the mitochondrial proteins
Cleavage Sites	LFQ data for the Nt-arginylation sites. This sheet contains the sites with protease cleavage sites. SP: signal peptidase, mTP: mitochondrial transit peptidase

## Sheet: Nt-arginylation Sites
prot_pos_master	prot_pos_reposition	sequence	pcc_check	rt_check	b_y_ttest_check	p2gv_check	p1r_check	score_sum	prot	Localizations	Sequence	count	gene	MOCK	MG132	MGTG	argpair_MOCK	argpair_MG132	argpair_MGTG	ML filtering	gene_position	loc	MG132_arg	MGTG_arg	MOCK_arg	MG132_free	MGTG_free	MOCK_free	cleavage_type	cleavage_score	cleavage_pos	source_cleavage	protease
A5A3E0|712	ACTB|P60709|ACTB_HUMAN|12	RDGSGMCKAGFAGDDAPR	1	1	1	0	0	3	A5A3E0	Cytoplasm	NGSGMCKAGFAGDDAPR	25	ACTB	4	12	9	21	30	19	Passed	ACTB|712	Cytoplasm	0.87959	-1.39883	0.519237	0.358144	1.00575	-1.36389	C14.001	0.995	procleave	NA	caspase-1
O00264|49	PGRMC1|O00264|PGRC1_HUMAN|49	RDQPAASGDSDDDEPPPLPR	1	1	1	0	0	3	O00264	Endoplasmic reticulum	DQPAASGDSDDDEPPPLPR	1	PGRMC1	0	0	1	0	0	0	Passed	PGRMC1|49	Endoplasmic reticulum	-0.913596	1.39168	-0.478086	NA	NA	NA	NA	NA	NA	NA	NA
O00767|142	SCD|O00767|SCD_HUMAN|142	RDTMAFQNDVYEWAR	1	1	1	0	0	3	O00767	Endoplasmic reticulum	NTMAFQNDVYEWAR	1	SCD	0	1	0	0	0	0	Passed	SCD|142	Endoplasmic reticulum	1.31092	-0.195983	-1.11494	NA	NA	NA	NA	NA	NA	NA	NA
O00767|7	SCD|O00767|SCD_HUMAN|7	REDDISSSYTTTTTITAPPSR	1	1	1	0	0	3	O00767	Endoplasmic reticulum	QDDISSSYTTTTTITAPPSR	1	SCD	0	1	0	0	0	0	Passed	SCD|7	Endoplasmic reticulum	NA	NA	NA	NA	NA	NA	NA	NA	NA	NA	NA
O14828|22	SCAMP3|O14828|SCAM3_HUMAN|22	REDPAVIQHRPSR	1	1	1	0	0	3	O14828	Cell membrane|Lysosome/Vacuole|Golgi apparatus	QDPAVIQHRPSR	1	SCAMP3	0	1	1	1	0	0	Passed	SCAMP3|22	Cell membrane	1.3557	-1.02651	-0.329182	NA	NA	NA	NA	NA	NA	NA	NA
O14965|35	AURKA|O14965|AURKA_HUMAN|35	RDPLPVNSGQAQR	1	1	1	0	0	3	O14965	Cytoplasm|Nucleus	NPLPVNSGQAQR	1	AURKA	0	1	0	0	0	0	Passed	AURKA|35	Cytoplasm	1.22441	0.000674849	-1.22508	NA	NA	NA	NA	NA	NA	NA	NA
O43290|646	SART1|O43290|SNUT1_HUMAN|646	RENKGLLETTVQKVAR	1	1	1	0	0	3	O43290	Nucleus	QNKGLLETTVQKVAR	1	SART1	0	1	0	0	0	0	Passed	SART1|646	Nucleus	-0.915602	1.39121	-0.47561	NA	NA	NA	NA	NA	NA	NA	NA
O43681|166	GET3|O43681|GET3_HUMAN|166	RDTAPTGHTLR	1	1	1	0	0	3	O43681	Cytoplasm	DTAPTGHTLR	1	GET3	0	1	0	0	0	0	Passed	GET3|166	Cytoplasm	-1.32185	1.09628	0.225569	NA	NA	NA	NA	NA	NA	NA	NA
O43776|5	NARS1|O43776|SYNC_HUMAN|5	RELYVSDR	1	1	1	0	0	3	O43776	Cytoplasm	ELYVSDR	1	NARS1	0	0	1	0	0	0	Passed	NARS1|5	Cytoplasm	-1.3877	0.929902	0.457796	NA	NA	NA	NA	NA	NA	NA	NA
O43852|225	CALU|O43852|CALU_HUMAN|225	RDEPEWVKTER	1	1	1	0	0	3	O43852	Extracellular|Endoplasmic reticulum	DEPEWVKTER	2	CALU	0	0	2	0	0	0	Passed	CALU|225	Extracellular	-0.586318	1.40769	-0.82137	NA	NA	NA	NA	NA	NA	NA	NA
O60427|4	FADS1|O60427|FADS1_HUMAN|4	RDPVAAETAAQGPTPR	1	1	1	0	0	3	O60427	Endoplasmic reticulum	DPVAAETAAQGPTPR	17	FADS1	6	5	6	2	4	4	Passed	FADS1|4	Endoplasmic reticulum	1.41077	-0.619915	-0.790851	-0.542922	1.40236	-0.859436	M12.033	0.937	procleave	NA	LAST_MAM peptidase
O60427|9	FADS1|O60427|FADS1_HUMAN|9	RETAAQGPTPR	1	1	1	0	0	3	O60427	Endoplasmic reticulum	ETAAQGPTPR	1	FADS1	0	1	0	5	3	5	Passed	FADS1|9	Endoplasmic reticulum	1.33056	-0.250301	-1.08026	NA	NA	NA	NA	NA	NA	NA	NA
O75369|134	FLNB|O75369|FLNB_HUMAN|134	RDDAKKQTPKQR	1	1	1	0	0	3	O75369	Cytoplasm	DDAKKQTPKQR	9	FLNB	0	4	5	0	2	2	Passed	FLNB|134	Cytoplasm	0.67109	0.742522	-1.41361	0.617504	0.793072	-1.41058	NA	NA	NA	NA	NA
O75396|152	SEC22B|O75396|SC22B_HUMAN|152	RDIEEVLQR	1	1	1	0	0	3	O75396	Endoplasmic reticulum|Golgi apparatus	NIEEVLQR	2	SEC22B	0	2	0	0	0	0	Passed	SEC22B|152	Endoplasmic reticulum	0.596827	-1.40875	0.811923	NA	NA	NA	NA	NA	NA	NA	NA
O75787|282	ATP6AP2|O75787|RENR_HUMAN|282	REAKQAKNPASPY	1	1	1	0	0	3	O75787	Endoplasmic reticulum	EAKQAKNPASPY	1	ATP6AP2	0	1	0	0	1	0	Passed	ATP6AP2|282	Endoplasmic reticulum	0.837018	-1.4057	0.568685	1.18924	-1.2574	0.0681578	NA	NA	NA	NA	NA
O95347|238	SMC2|O95347|SMC2_HUMAN|238	REFLLAEDTKVR	1	1	1	0	0	3	O95347	Cytoplasm|Nucleus	QFLLAEDTKVR	1	SMC2	0	1	0	0	0	0	Passed	SMC2|238	Cytoplasm	0.624445	0.786664	-1.41111	NA	NA	NA	NA	NA	NA	NA	NA
O95347|989	SMC2|O95347|SMC2_HUMAN|989	RDVLTEAEER	1	1	1	0	0	3	O95347	Cytoplasm|Nucleus	NVLTEAEER	1	SMC2	0	1	0	1	0	0	Passed	SMC2|989	Cytoplasm	0.543819	0.858664	-1.40248	NA	NA	NA	NA	NA	NA	NA	NA
O95721|36	SNAP29|O95721|SNP29_HUMAN|36	RDAPADRQQYLR	1	1	1	0	0	3	O95721	Cytoplasm|Lysosome/Vacuole	DAPADRQQYLR	1	SNAP29	0	0	1	0	0	0	Passed	SNAP29|36	Cytoplasm	-1.09886	1.32039	-0.221534	NA	NA	NA	NA	NA	NA	NA	NA
P02452|24	COL1A1|P02452|CO1A1_HUMAN|24	REEGQVEGQDEDIPPITCVQNGLR	1	1	1	0	0	3	P02452	Extracellular	EEGQVEGQDEDIPPITCVQNGLR	1	COL1A1	0	0	1	0	0	0	Passed	COL1A1|24	Extracellular	-0.942564	1.38434	-0.441779	NA	NA	NA	SP	1	prot_pos_pos1	uniprot	NA
P02545|231	LMNA|P02545|LMNA_HUMAN|231	RDGKQREFESR	1	1	1	0	0	3	P02545	Cytoplasm|Nucleus	NGKQREFESR	11	LMNA	2	7	2	0	0	0	Passed	LMNA|231	Cytoplasm	0.800881	0.608986	-1.40987	NA	NA	NA	C14.005	0.995	procleave	NA	caspase-5
P04792|64	HSPB1|P04792|HSPB1_HUMAN|64	RESPAVAAPAYSR	1	1	1	0	0	3	P04792	Cytoplasm	ESPAVAAPAYSR	2	HSPB1	0	1	1	5	22	15	Passed	HSPB1|64	Cytoplasm	1.33834	-0.273385	-1.06495	NA	NA	NA	NA	NA	NA	NA	NA
P05787|69	KRT8|P05787|K2C8_HUMAN|69	RDQSLLSPLVLEVDPNIQAVR	1	1	1	0	0	3	P05787	Cytoplasm	NQSLLSPLVLEVDPNIQAVR	2	KRT8	0	1	1	0	0	0	Passed	KRT8|69	Cytoplasm	0.564161	0.840992	-1.40515	NA	NA	NA	NA	NA	NA	NA	NA
P05787|70	KRT8|P05787|K2C8_HUMAN|70	RESLLSPLVLEVDPNIQAVR	1	1	1	0	0	3	P05787	Cytoplasm	QSLLSPLVLEVDPNIQAVR	1	KRT8	0	0	1	2	1	0	Passed	KRT8|70	Cytoplasm	-1.25569	1.19125	0.0644384	0.124071	-1.28206	1.15799	NA	NA	NA	NA	NA
P06748|209	NPM1|P06748|NPM_HUMAN|209	RENGKDSKPSSTPR	1	1	1	0	0	3	P06748	Nucleus	QNGKDSKPSSTPR	2	NPM1	0	1	1	1	1	2	Passed	NPM1|209	Nucleus	0.987896	0.382435	-1.37033	-0.75828	1.41295	-0.654668	NA	NA	NA	NA	NA
P07237|18	P4HB|P07237|PDIA1_HUMAN|18	RDAPEEEDHVLVLR	1	1	1	0	0	3	P07237	Endoplasmic reticulum	DAPEEEDHVLVLR	37	P4HB	1	11	25	64	73	34	Passed	P4HB|18	Endoplasmic reticulum	0.0942243	1.17491	-1.26914	0.932649	-1.38699	0.454341	SP	1	prot_pos_0	uniprot	NA
P07919|15	UQCRHL|A0A096LP55|QCR6L_HUMAN|15	RDPEEEEEEEEELVDPLTTVR	1	1	1	0	0	3	P07919	Cytoplasm|Mitochondrion	DPEEEEEEEEELVDPLTTVR	2	UQCRHL	0	1	1	0	0	0	Passed	UQCRHL|15	Cytoplasm	-1.36284	1.00852	0.354323	NA	NA	NA	mTP	1	prot_pos_pos1	uniprot	NA
P07996|19	THBS1|P07996|TSP1_HUMAN|19	RDRIPESGGDNSVFDIFELTGAAR	1	1	1	0	0	3	P07996	Extracellular	NRIPESGGDNSVFDIFELTGAAR	5	THBS1	0	0	5	3	2	8	Passed	THBS1|19	Extracellular	-0.798663	1.41008	-0.611412	-1.19077	1.2561	-0.065334	SP	1	prot_pos_0	uniprot	NA
P08174|35	CD55|P08174|DAF_HUMAN|35	RDCGLPPDVPNAQPALEGR	1	1	1	0	0	3	P08174	Cell membrane	DCGLPPDVPNAQPALEGR	25	CD55	0	4	21	68	65	45	Passed	CD55|35	Cell membrane	0.0455388	1.20134	-1.24688	-0.375376	-0.993125	1.3685	SP	1	prot_pos_0	uniprot	NA
P08670|259	VIM|P08670|VIME_HUMAN|259	RDVSKPDLTAALR	1	1	1	0	0	3	P08670	Cytoplasm	DVSKPDLTAALR	1	VIM	0	1	0	0	0	1	Passed	VIM|259	Cytoplasm	1.21729	0.0147742	-1.23207	-0.255942	1.33249	-1.07655	M12.004	0.986	procleave	NA	meprin beta subunit
P08670|93	VIM|P08670|VIME_HUMAN|93	RDTEFKNTR	1	1	1	0	0	3	P08670	Cytoplasm	NTEFKNTR	1	VIM	0	0	1	0	0	0	Passed	VIM|93	Cytoplasm	NA	NA	NA	NA	NA	NA	NA	NA	NA	NA	NA
P08729|70	KRT7|P08729|K2C7_HUMAN|70	RESLLAPLRLDADPSLQR	1	1	1	0	0	3	P08729	Cytoplasm	QSLLAPLR	1	KRT7	0	1	1	0	0	0	Passed	KRT7|70	Cytoplasm	1.30993	-0.193382	-1.11655	NA	NA	NA	NA	NA	NA	NA	NA
P0DMV9|333	HSPA1A|P0DMV8|HS71A_HUMAN|333	RDLVLVGGSTR	1	1	1	0	0	3	P0DMV9	Cytoplasm	DLVLVGGSTR	1	HSPA1A	0	1	0	0	3	2	Passed	HSPA1A|333	Cytoplasm	0.383711	-1.37066	0.986947	1.30475	-0.179923	-1.12483	NA	NA	NA	NA	NA
P10412|3	H1-4|P10412|H14_HUMAN|3	RETAPAAPAAPAPAEKTPVKKKAR	1	1	1	0	0	3	P10412	Nucleus	ETAPAAPAAPAPAEKTPVKKKAR	1	H1-4	0	1	0	17	16	11	Passed	H1-4|3	Nucleus	1.41311	-0.754908	-0.658203	NA	NA	NA	NA	NA	NA	NA	NA
P13995|36	MTHFD2|P13995|MTDC_HUMAN|36	REAVVISGR	1	1	1	0	0	3	P13995	Mitochondrion	EAVVISGR	2	MTHFD2	0	1	1	6	4	5	Passed	MTHFD2|36	Mitochondrion	1.13165	0.168698	-1.30035	1.30706	-1.12118	-0.185872	mTP	1	prot_pos_0	uniprot	NA
P14625|22	HSP90B1|P14625|ENPL_HUMAN|22	RDDEVDVDGTVEEDLGKSR	1	1	1	0	0	3	P14625	Endoplasmic reticulum|Lysosome/Vacuole	DDEVDVDGTVEEDLGKSR	64	HSP90B1	0	2	62	59	15	45	Passed	HSP90B1|22	Endoplasmic reticulum	-0.396246	1.37381	-0.977565	-1.37544	0.402899	0.972541	SP	1	prot_pos_0	uniprot	NA
P14625|24	HSP90B1|P14625|ENPL_HUMAN|24	REVDVDGTVEEDLGKSR	1	1	1	0	0	3	P14625	Endoplasmic reticulum|Lysosome/Vacuole	EVDVDGTVEEDLGKSR	12	HSP90B1	0	2	10	19	16	17	Passed	HSP90B1|24	Endoplasmic reticulum	-0.133804	1.28615	-1.15235	0.24035	1.08675	-1.3271	SP	1	prot_pos_pos2	uniprot	NA
P14625|26	HSP90B1|P14625|ENPL_HUMAN|26	RDVDGTVEEDLGKSR	1	1	1	0	0	3	P14625	Endoplasmic reticulum|Lysosome/Vacuole	DVDGTVEEDLGKSR	5	HSP90B1	0	2	3	0	0	0	Passed	HSP90B1|26	Endoplasmic reticulum	0.609412	0.800492	-1.4099	NA	NA	NA	NA	NA	NA	NA	NA
P17302|47	GJA1|P17302|CXA1_HUMAN|47	RDEQSAFR	1	1	1	0	0	3	P17302	Cell membrane	DEQSAFR	1	GJA1	0	0	1	0	0	0	Passed	GJA1|47	Cell membrane	1.11294	0.199191	-1.31213	NA	NA	NA	NA	NA	NA	NA	NA
P17813|26	ENG|P17813|EGLN_HUMAN|26	RETVHCDLQPVGPER	1	1	1	0	0	3	P17813	Cell membrane	ETVHCDLQPVGPER	2	ENG	0	0	2	11	5	5	Passed	ENG|26	Cell membrane	-1.1983	-0.0512878	1.24958	-0.00797024	-1.22074	1.22871	SP	1	prot_pos_0	uniprot	NA
P20810|77	CAST|P20810|ICAL_HUMAN|77	RDAHNKKAVSR	1	1	1	0	0	3	P20810	Cytoplasm	DAHNKKAVSR	4	CAST	0	2	2	2	3	3	Passed	CAST|77	Cytoplasm	0.459332	0.928678	-1.38801	0.621165	0.789697	-1.41086	NA	NA	NA	NA	NA
P21333|1502	FLNA|P21333|FLNA_HUMAN|1502	RDADGTQTVNYVPSR	1	1	1	0	0	3	P21333	Cytoplasm	NADGTQTVNYVPSR	24	FLNA	0	12	12	0	0	0	Passed	FLNA|1502	Cytoplasm	0.998457	0.368132	-1.36659	NA	NA	NA	C14.003	0.996	procleave	NA	caspase-3
P21333|1504	FLNA|P21333|FLNA_HUMAN|1504	RDGTQTVNYVPSR	1	1	1	0	0	3	P21333	Cytoplasm	DGTQTVNYVPSR	2	FLNA	0	2	0	0	0	0	Passed	FLNA|1504	Cytoplasm	1.34938	-1.04127	-0.308117	NA	NA	NA	NA	NA	NA	NA	NA
P21399|179	ACO1|P21399|ACOHC_HUMAN|179	REVNLEYLAR	1	1	1	0	0	3	P21399	Cytoplasm	QVNLEYLAR	2	ACO1	0	2	0	0	0	0	Passed	ACO1|179	Cytoplasm	1.09381	0.229428	-1.32323	NA	NA	NA	NA	NA	NA	NA	NA
P22692|22	IGFBP4|P22692|IBP4_HUMAN|22	RDEAIHCPPCSEEKLAR	1	1	1	0	0	3	P22692	Extracellular	DEAIHCPPCSEEKLAR	2	IGFBP4	0	0	2	3	3	2	Passed	IGFBP4|22	Extracellular	0.347354	1.01355	-1.3609	0.547666	-1.40301	0.855347	SP	1	prot_pos_0	uniprot	NA
P23142|30	FBLN1|P23142|FBLN1_HUMAN|30	RDVLLEACCADGHR	1	1	1	0	0	3	P23142	Extracellular	DVLLEACCADGHR	12	FBLN1	0	4	8	7	16	6	Passed	FBLN1|30	Extracellular	0.322021	1.03156	-1.35358	1.32659	-1.08771	-0.238881	SP	1	prot_pos_0	uniprot	NA
P23588|46	EIF4B|P23588|IF4B_HUMAN|46	RDLEGDVSTTWHSNDDDVYR	1	1	1	0	0	3	P23588	Cytoplasm	DLEGDVSTTWHSNDDDVYR	1	EIF4B	0	0	3	0	0	0	Passed	EIF4B|46	Cytoplasm	-0.949962	1.38227	-0.432311	NA	NA	NA	C14.003	0.997	procleave	NA	caspase-3
P26038|485	MSN|P26038|MOES_HUMAN|485	RENGAEASADLR	1	1	1	0	0	3	P26038	Cytoplasm	ENGAEASADLR	1	MSN	0	0	1	14	6	8	Passed	MSN|485	Cytoplasm	-1.29307	1.1425	0.150568	NA	NA	NA	C14.003	0.957	procleave	NA	caspase-3
P26599|43	PTBP1|P26599|PTBP1_HUMAN|43	RDSKKFKGDSR	1	1	1	0	0	3	P26599	Nucleus	DSKKFKGDSR	2	PTBP1	0	1	1	0	0	1	Passed	PTBP1|43	Nucleus	1.39934	-0.876837	-0.522502	0.824071	0.583294	-1.40736	NA	NA	NA	NA	NA
P27797|18	CALR|P27797|CALR_HUMAN|18	REPAVYFKEQFLDGDGWTSR	1	1	1	0	0	3	P27797	Endoplasmic reticulum	EPAVYFKEQFLDGDGWTSR	36	CALR	1	5	30	23	15	9	Passed	CALR|18	Endoplasmic reticulum	-0.622064	1.41093	-0.788867	-0.878821	-0.520149	1.39897	SP	1	prot_pos_0	uniprot	NA
P27816|12	MAP4|P27816|MAP4_HUMAN|12	REPSPDIEGEIKR	1	1	1	0	0	3	P27816	Cytoplasm	EPSPDIEGEIKR	3	MAP4	0	1	2	5	6	2	Passed	MAP4|12	Cytoplasm	0.937583	0.448108	-1.38569	NA	NA	NA	NA	NA	NA	NA	NA
P29353|112	SHC1|P29353|SHC1_HUMAN|112	RDKLSGGGGRR	1	1	1	0	0	3	P29353	Cytoplasm|Cell membrane	NKLSGGGGRR	1	SHC1	0	1	0	0	0	0	Passed	SHC1|112	Cytoplasm	0.502551	-1.39608	0.893531	NA	NA	NA	NA	NA	NA	NA	NA
P30101|26	PDIA3|P30101|PDIA3_HUMAN|26	RDVLELTDDNFESR	1	1	1	0	0	3	P30101	Endoplasmic reticulum	DVLELTDDNFESR	3	PDIA3	0	0	3	0	0	0	Passed	PDIA3|26	Endoplasmic reticulum	-0.678407	1.41383	-0.735423	NA	NA	NA	SP	1	prot_pos_pos1	uniprot	NA
P33897|424	ABCD1|P33897|ABCD1_HUMAN|424	REVFEDVQR	1	1	1	0	0	3	P33897	Mitochondrion|Peroxisome	QVFEDVQR	3	ABCD1	0	3	0	0	0	0	Passed	ABCD1|424	Mitochondrion	1.38534	-0.446438	-0.938899	NA	NA	NA	NA	NA	NA	NA	NA
P34897|27	SHMT2|P34897|GLYM_HUMAN|27	REHSNAAQTQTGEANR	1	1	1	0	0	3	P34897	Mitochondrion	QHSNAAQTQTGEANR	2	SHMT2	0	1	1	16	5	4	Passed	SHMT2|27	Mitochondrion	-0.674999	1.41373	-0.738735	-1.41421	0.709941	0.704269	mTP	0.958177	prot_pos_neg2	NA	NA
P35052|24	GPC1|P35052|GPC1_HUMAN|24	RDPASKSR	1	1	1	0	0	3	P35052	Cell membrane	DPASKSR	1	GPC1	0	0	1	1	1	1	Passed	GPC1|24	Cell membrane	0.842536	0.562398	-1.40493	1.40631	-0.573854	-0.832456	SP	1	prot_pos_0	uniprot	NA
P35555|28	FBN1|P35555|FBN1_HUMAN|28	RDLEAGNVKETR	1	1	1	0	0	3	P35555	Extracellular	NLEAGNVKETR	4	FBN1	0	2	2	2	1	0	Passed	FBN1|28	Extracellular	0.401468	0.973625	-1.37509	1.02284	0.334365	-1.3572	SP	0.999856	prot_pos_0	NA	NA
P35613|161	BSG|P35613|BASI_HUMAN|161	RDSATEVTGHR	1	1	1	0	0	3	P35613	Cell membrane	DSATEVTGHR	2	BSG	0	2	0	0	0	0	Passed	BSG|161	Cell membrane	1.41386	-0.679635	-0.734227	NA	NA	NA	NA	NA	NA	NA	NA
P35998|3	PSMC2|P35998|PRS7_HUMAN|3	RDYLGADQR	1	1	1	0	0	3	P35998	Cytoplasm	DYLGADQR	3	PSMC2	0	1	2	0	0	0	Passed	PSMC2|3	Cytoplasm	-1.00393	-0.360645	1.36457	NA	NA	NA	NA	NA	NA	NA	NA
P42766|23	RPL35|P42766|RL35_HUMAN|23	RDLKVELSQLR	1	1	1	0	0	3	P42766	Cytoplasm	DLKVELSQLR	1	RPL35	0	1	0	1	1	1	Passed	RPL35|23	Cytoplasm	0.547956	0.855096	-1.40305	1.2663	-0.0878486	-1.17846	M12.002	0.989	procleave	NA	meprin alpha subunit
P42766|62	RPL35|P42766|RL35_HUMAN|62	RDQTQKENLR	1	1	1	0	0	3	P42766	Cytoplasm	NQTQKENLR	3	RPL35	0	2	1	0	0	0	Passed	RPL35|62	Cytoplasm	1.39676	-0.506557	-0.890203	NA	NA	NA	NA	NA	NA	NA	NA
P42766|63	RPL35|P42766|RL35_HUMAN|63	RETQKENLR	1	1	1	0	0	3	P42766	Cytoplasm	QTQKENLR	3	RPL35	0	2	1	0	0	0	Passed	RPL35|63	Cytoplasm	1.40364	-0.851309	-0.55233	NA	NA	NA	NA	NA	NA	NA	NA
P43487|131	RANBP1|P43487|RANG_HUMAN|131	RECPKPELLAIR	1	1	1	0	0	3	P43487	Cytoplasm|Nucleus	ECPKPELLAIR	3	RANBP1	0	1	2	5	6	9	Passed	RANBP1|131	Cytoplasm	1.02764	0.327581	-1.35523	NA	NA	NA	NA	NA	NA	NA	NA
P48634|1466	PRRC2A|P48634|PRC2A_HUMAN|1466	RDQVIHSNPAGIQQALAQLSSR	1	1	1	0	0	3	P48634	Cytoplasm|Nucleus	DQVIHSNPAGIQQALAQLSSR	2	PRRC2A	0	1	1	0	0	0	Passed	PRRC2A|1466	Cytoplasm	0.701874	0.712326	-1.4142	NA	NA	NA	NA	NA	NA	NA	NA
P52292|59	KPNA2|P52292|IMA1_HUMAN|59	RDATSPLQENR	1	1	1	0	0	3	P52292	Cytoplasm|Nucleus	DATSPLQENR	6	KPNA2	1	3	2	0	0	0	Passed	KPNA2|59	Cytoplasm	1.35366	-0.322291	-1.03137	NA	NA	NA	NA	NA	NA	NA	NA
P60709|280	ACTB|P60709|ACTB_HUMAN|280	RDSIMKCDVDIR	1	1	1	0	0	3	P60709	Cytoplasm|Nucleus	NSIMKCDVDIR	9	ACTB	0	5	4	32	22	21	Passed	ACTB|280	Cytoplasm	1.4105	-0.793942	-0.616559	-1.36006	0.344365	1.0157	A01.009	0.989	procleave	NA	cathepsin D
P62310|7	LSM3|P62310|LSM3_HUMAN|7	REQQTTNTVEEPLDLIR	1	1	1	0	0	3	P62310	Cytoplasm|Nucleus	QQQTTNTVEEPLDLIR	11	LSM3	0	5	6	0	0	0	Passed	LSM3|7	Cytoplasm	-1.30539	1.12382	0.181571	NA	NA	NA	C14.003	0.994	procleave	NA	caspase-3
P62310|9	LSM3|P62310|LSM3_HUMAN|9	RETTNTVEEPLDLIR	1	1	1	0	0	3	P62310	Cytoplasm|Nucleus	QTTNTVEEPLDLIR	1	LSM3	0	0	1	0	0	0	Passed	LSM3|9	Cytoplasm	-0.666218	1.41344	-0.747222	NA	NA	NA	NA	NA	NA	NA	NA
P62753|110	RPS6|P62753|RS6_HUMAN|110	RDLVIVKKGEKDIPGLTDTTVPR	1	1	1	0	0	3	P62753	Cytoplasm|Nucleus	NLVIVKKGEKDIPGLTDTTVPR	4	RPS6	0	2	2	20	9	17	Passed	RPS6|110	Cytoplasm	0.504392	0.892003	-1.3964	-1.30768	0.187486	1.12019	NA	NA	NA	NA	NA
P67809|223	YBX1|P67809|YBOX1_HUMAN|223	RDQGAGEQGRPVR	1	1	1	0	0	3	P67809	Cytoplasm|Nucleus	NQGAGEQGRPVR	1	YBX1	0	0	1	0	0	0	Passed	YBX1|223	Cytoplasm	-1.21435	1.23488	-0.0205289	NA	NA	NA	M12.002	0.985	procleave	NA	meprin alpha subunit
P78333|25	GPC5|P78333|GPC5_HUMAN|25	REGVQTCEEVR	1	1	1	0	0	3	P78333	Cell membrane	EGVQTCEEVR	2	GPC5	0	1	1	0	0	0	Passed	GPC5|25	Cell membrane	1.04978	0.295764	-1.34554	NA	NA	NA	SP	1	prot_pos_0	uniprot	NA
P78347|692	GTF2I|P78347|GTF2I_HUMAN|692	RDNNNPQTSAVR	1	1	1	0	0	3	P78347	Nucleus	NNNNPQTSAVR	2	GTF2I	0	1	1	0	0	0	Passed	GTF2I|692	Nucleus	0.828641	0.578159	-1.4068	NA	NA	NA	NA	NA	NA	NA	NA
P78347|693	GTF2I|P78347|GTF2I_HUMAN|693	RDNNPQTSAVR	1	1	1	0	0	3	P78347	Nucleus	NNNPQTSAVR	1	GTF2I	0	1	0	0	0	0	Passed	GTF2I|693	Nucleus	1.41261	-0.764563	-0.64805	NA	NA	NA	NA	NA	NA	NA	NA
P78527|2714	PRKDC|P78527|PRKDC_HUMAN|2714	RDKVKGAAGRTDLLR	1	1	1	0	0	3	P78527	Cytoplasm	NKVKGAAGR	16	PRKDC	3	9	8	1	3	5	Passed	PRKDC|2714	Cytoplasm	0.76901	0.643341	-1.41235	0.809587	0.599411	-1.409	C14.003	0.998	procleave	NA	caspase-3
P98153|22	DGCR2|P98153|IDD_HUMAN|22	REPLRPELR	1	1	1	0	0	3	P98153	Cell membrane|Lysosome/Vacuole	EPLRPELR	2	DGCR2	0	1	1	0	0	0	Passed	DGCR2|22	Cell membrane	-0.0616337	1.2544	-1.19276	NA	NA	NA	SP	1	prot_pos_pos1	uniprot	NA
Q03518|638	TAP1|Q03518|TAP1_HUMAN|638	REAGSQLSGGQR	1	1	1	0	0	3	Q03518	Lysosome/Vacuole	EAGSQLSGGQR	1	TAP1	0	1	0	1	2	0	Passed	TAP1|638	Lysosome/Vacuole	1.39949	-0.523508	-0.875987	NA	NA	NA	C14.005	0.94	procleave	NA	caspase-5
Q04637|1049	EIF4G1|Q04637|IF4G1_HUMAN|1049	RDGGWNTVPISKGSRPIDTSR	1	1	1	0	0	3	Q04637	Cytoplasm	DGGWNTVPISKGSRPIDTSR	2	EIF4G1	0	0	2	0	0	0	Passed	EIF4G1|1049	Cytoplasm	1.22146	0.00654696	-1.22801	NA	NA	NA	NA	NA	NA	NA	NA
Q04837|17	SSBP1|Q04837|SSBP_HUMAN|17	RESETTTSLVLER	1	1	1	0	0	3	Q04837	Mitochondrion	ESETTTSLVLER	3	SSBP1	2	0	1	37	25	21	Passed	SSBP1|17	Mitochondrion	-1.3498	0.309497	1.04031	0.461439	-1.38844	0.926996	mTP	1	prot_pos_0	uniprot	NA
Q12772|801	SREBF2|Q12772|SRBP2_HUMAN|801	REAFCKNLLER	1	1	1	0	0	3	Q12772	Endoplasmic reticulum	QAFCKNLLER	3	SREBF2	0	2	1	0	0	0	Passed	SREBF2|801	Endoplasmic reticulum	1.0708	-1.33542	0.26462	NA	NA	NA	NA	NA	NA	NA	NA
Q12907|45	LMAN2|Q12907|LMAN2_HUMAN|45	RDITDGNSEHLKR	1	1	1	0	0	3	Q12907	Endoplasmic reticulum|Lysosome/Vacuole|Golgi apparatus	DITDGNSEHLKR	4	LMAN2	0	0	4	26	22	14	Passed	LMAN2|45	Endoplasmic reticulum	0.185582	1.12136	-1.30694	1.26452	-1.18067	-0.0838495	SP	1	prot_pos_0	uniprot	NA
Q12972|165	PPP1R8|Q12972|PP1R8_HUMAN|165	RDLTEFNTAHNKR	1	1	1	0	0	3	Q12972	Nucleus	NLTEFNTAHNKR	2	PPP1R8	0	0	2	0	0	0	Passed	PPP1R8|165	Nucleus	0.743581	0.669994	-1.41358	NA	NA	NA	S01.010	0.911	procleave	NA	granzyme B
Q13018|21	PLA2R1|Q13018|PLA2R_HUMAN|21	REGVAAALTPER	1	1	1	0	0	3	Q13018	Cell membrane|Lysosome/Vacuole	EGVAAALTPER	1	PLA2R1	0	1	0	0	1	1	Passed	PLA2R1|21	Cell membrane	1.41362	-0.671348	-0.742272	1.31199	-0.198821	-1.11317	SP	1	prot_pos_0	uniprot	NA
Q13136|222	PPFIA1|Q13136|LIPA1_HUMAN|222	RDINHEQENTPSTSGKR	1	1	1	0	0	3	Q13136	Cytoplasm	DINHEQENTPSTSGKR	1	PPFIA1	0	0	1	0	0	0	Passed	PPFIA1|222	Cytoplasm	0.465639	0.923634	-1.38927	NA	NA	NA	NA	NA	NA	NA	NA
Q13136|837	PPFIA1|Q13136|LIPA1_HUMAN|837	RDSSQDALGLSKLGGQAEKNR	1	1	1	0	0	3	Q13136	Cytoplasm	NSSQDALGLSKLGGQAEKNR	5	PPFIA1	0	3	2	0	0	0	Passed	PPFIA1|837	Cytoplasm	0.502896	0.893245	-1.39614	NA	NA	NA	C14.003	0.996	procleave	NA	caspase-3
Q13185|101	CBX3|Q13185|CBX3_HUMAN|101	RDSKSKKKR	1	1	1	0	0	3	Q13185	Nucleus	DSKSKKKR	3	CBX3	1	1	1	0	0	2	Passed	CBX3|101	Nucleus	0.427502	0.953696	-1.3812	0.659248	0.753909	-1.41316	NA	NA	NA	NA	NA
Q13813|678	SPTAN1|Q13813|SPTN1_HUMAN|678	RDQQQQFNR	1	1	1	0	0	3	Q13813	Cytoplasm	NQQQQFNR	1	SPTAN1	0	1	0	0	0	0	Passed	SPTAN1|678	Cytoplasm	0.846106	-1.40442	0.558313	NA	NA	NA	NA	NA	NA	NA	NA
Q14157|22	UBAP2L|Q14157|UBP2L_HUMAN|22	RETQHKQRPQATAEQIR	1	1	1	0	0	3	Q14157	Cytoplasm|Nucleus	QTQHKQRPQATAEQIR	1	UBAP2L	0	0	1	0	0	0	Passed	UBAP2L|22	Cytoplasm	0.124036	1.15801	-1.28204	NA	NA	NA	NA	NA	NA	NA	NA
Q14257|26	RCN2|Q14257|RCN2_HUMAN|26	REELHYPLGER	1	1	1	0	0	3	Q14257	Endoplasmic reticulum	EELHYPLGER	2	RCN2	0	0	2	4	2	2	Passed	RCN2|26	Endoplasmic reticulum	-0.997411	1.36697	-0.369556	0.230793	-1.32372	1.09293	SP	0.999846	prot_pos_0	NA	NA
Q14444|101	CAPRIN1|Q14444|CAPR1_HUMAN|101	REVTNNLEFAKELQR	1	1	1	0	0	3	Q14444	Cytoplasm|Nucleus	EVTNNLEFAKELQR	1	CAPRIN1	0	0	1	7	9	9	Passed	CAPRIN1|101	Cytoplasm	-0.992536	1.36871	-0.376174	NA	NA	NA	NA	NA	NA	NA	NA
Q14683|1114	SMC1B|Q8NDV3|SMC1B_HUMAN|1110	RDCVAPGKR	1	1	1	0	0	3	Q14683	Cytoplasm|Nucleus	NCVAPGKR	1	SMC1B	0	1	0	0	0	0	Passed	SMC1B|1114	Cytoplasm	0.953495	0.427761	-1.38126	NA	NA	NA	NA	NA	NA	NA	NA
Q15904|42	ATP6AP1|Q15904|VAS1_HUMAN|42	REQQVPLVLWSSDR	1	1	1	0	0	3	Q15904	Lysosome/Vacuole	EQQVPLVLWSSDR	2	ATP6AP1	0	2	0	2	2	1	Passed	ATP6AP1|42	Lysosome/Vacuole	0.857021	0.545726	-1.40275	0.532264	-1.40082	0.868558	SP	1	prot_pos_0	uniprot	NA
Q15910|209	EZH2|Q15910|EZH2_HUMAN|209	RDKESRPPR	1	1	1	0	0	3	Q15910	Nucleus	DKESRPPR	4	EZH2	0	2	2	0	0	0	Passed	EZH2|209	Nucleus	-0.950475	1.38213	-0.431651	NA	NA	NA	NA	NA	NA	NA	NA
Q16363|28	LAMA4|Q16363|LAMA4_HUMAN|28	RDDNAFPFDIEGSSAVGR	1	1	1	0	0	3	Q16363	Extracellular	DDNAFPFDIEGSSAVGR	1	LAMA4	0	0	1	0	0	0	Passed	LAMA4|28	Extracellular	NA	NA	NA	NA	NA	NA	SP	0.999897	prot_pos_0	NA	NA
Q16513|207	PKN2|Q16513|PKN2_HUMAN|207	RDAKPVISPLELR	1	1	1	0	0	3	Q16513	Cytoplasm|Cell membrane	NAKPVISPLELR	2	PKN2	0	0	2	0	0	0	Passed	PKN2|207	Cytoplasm	1.23221	-0.0150782	-1.21714	NA	NA	NA	NA	NA	NA	NA	NA
Q17RY6|18	LY6K|Q17RY6|LY6K_HUMAN|18	RDANLTAR	1	1	1	0	0	3	Q17RY6	Cell membrane	DANLTAR	1	LY6K	0	0	1	0	0	0	Passed	LY6K|18	Cell membrane	0.053554	1.19709	-1.25064	NA	NA	NA	SP	1	prot_pos_0	uniprot	NA
Q5T0F9|370	CC2D1B|Q5T0F9|C2D1B_HUMAN|370	RDVPATPVAPTESQTVLDALQQR	1	1	1	0	0	3	Q5T0F9	Cytoplasm	DVPATPVAPTESQTVLDALQQR	3	CC2D1B	0	1	2	0	0	0	Passed	CC2D1B|370	Cytoplasm	0.714013	0.700178	-1.41419	NA	NA	NA	NA	NA	NA	NA	NA
Q5T4S7|2313	UBR4|Q5T4S7|UBR4_HUMAN|2313	RDAQQIKHR	1	1	1	0	0	3	Q5T4S7	Cytoplasm|Nucleus	NAQQIKHR	1	UBR4	0	0	1	0	0	0	Passed	UBR4|2313	Cytoplasm	1.24016	-0.031428	-1.20873	NA	NA	NA	NA	NA	NA	NA	NA
Q63ZY3|257	KANK2|Q63ZY3|KANK2_HUMAN|257	REDPVALETR	1	1	1	0	0	3	Q63ZY3	Cytoplasm	EDPVALETR	1	KANK2	0	1	0	0	0	0	Passed	KANK2|257	Cytoplasm	1.16987	0.103221	-1.27309	NA	NA	NA	NA	NA	NA	NA	NA
Q68BL7|28	OLFML2A|Q68BL7|OLM2A_HUMAN|28	RDSKVFGDLDQVR	1	1	1	0	0	3	Q68BL7	Extracellular	DSKVFGDLDQVR	3	OLFML2A	0	1	2	0	0	1	Passed	OLFML2A|28	Extracellular	0.877723	0.521452	-1.39917	1.40524	-0.564851	-0.840387	SP	1	prot_pos_0	uniprot	NA
Q6NUK1|16	SLC25A24|Q6NUK1|SCMC1_HUMAN|16	REDAEQPTRYETLFQALDR	1	1	1	0	0	3	Q6NUK1	Mitochondrion	QDAEQPTRYETLFQALDR	3	SLC25A24	1	2	0	3	2	3	Passed	SLC25A24|16	Mitochondrion	1.33114	-0.251977	-1.07916	-0.352221	-1.01004	1.36226	NA	NA	NA	NA	NA
Q71F23|49	CENPU|Q71F23|CENPU_HUMAN|49	RDSDVSSIGR	1	1	1	0	0	3	Q71F23	Nucleus	NSDVSSIGR	3	CENPU	0	3	0	0	0	0	Passed	CENPU|49	Nucleus	1.13154	0.168877	-1.30042	NA	NA	NA	C14.003	0.94	procleave	NA	caspase-3
Q75N03|6	CBLL1|Q75N03|HAKAI_HUMAN|6	RDELQGTNSSGSLGGLDVR	1	1	1	0	0	3	Q75N03	Cytoplasm|Nucleus	NELQGTNSSGSLGGLDVR	1	CBLL1	0	0	1	0	0	0	Passed	CBLL1|6	Cytoplasm	0.837697	0.567913	-1.40561	NA	NA	NA	C14.003	0.949	procleave	NA	caspase-3
Q7L2J0|247	MEPCE|Q7L2J0|MEPCE_HUMAN|247	REGHVVLASPLKTGR	1	1	1	0	0	3	Q7L2J0	Nucleus	EGHVVLASPLKTGR	1	MEPCE	0	0	1	1	2	0	Passed	MEPCE|247	Nucleus	-0.624858	1.41114	-0.786281	NA	NA	NA	NA	NA	NA	NA	NA
Q7Z4N8|29	P4HA3|Q7Z4N8|P4HA3_HUMAN|29	RDTFSALTSVAR	1	1	1	0	0	3	Q7Z4N8	Endoplasmic reticulum	DTFSALTSVAR	3	P4HA3	0	2	1	2	1	0	Passed	P4HA3|29	Endoplasmic reticulum	1.31159	-0.197746	-1.11384	-0.0598355	-1.19373	1.25357	SP	0.999839	prot_pos_pos2	NA	NA
Q8N684|33	CPSF7|Q8N684|CPSF7_HUMAN|33	RDVLTATSQPSDDR	1	1	1	0	0	3	Q8N684	Nucleus	DVLTATSQPSDDR	1	CPSF7	0	0	1	0	0	0	Passed	CPSF7|33	Nucleus	1.38203	-0.431214	-0.950815	NA	NA	NA	C14.003	0.914	procleave	NA	caspase-3
Q8NC51|7	SERBP1|Q8NC51|PAIRB_HUMAN|7	REGFGCVVTNR	1	1	1	0	0	3	Q8NC51	Cytoplasm	EGFGCVVTNR	2	SERBP1	0	1	1	7	10	6	Passed	SERBP1|7	Cytoplasm	1.12219	0.184233	-1.30642	NA	NA	NA	M12.004	0.99	procleave	NA	meprin beta subunit
Q8WW12|3	PCNP|Q8WW12|PCNP_HUMAN|3	RDGKAGDEKPEKSQR	1	1	1	0	0	3	Q8WW12	Nucleus	DGKAGDEKPEKSQR	3	PCNP	0	1	2	0	0	0	Passed	PCNP|3	Nucleus	0.54686	0.856042	-1.4029	NA	NA	NA	NA	NA	NA	NA	NA
Q8WW12|8	PCNP|Q8WW12|PCNP_HUMAN|8	RDEKPEKSQR	1	1	1	0	0	3	Q8WW12	Nucleus	DEKPEKSQR	1	PCNP	0	0	1	0	0	0	Passed	PCNP|8	Nucleus	-1.32328	0.229543	1.09373	NA	NA	NA	NA	NA	NA	NA	NA
Q8WYP5|1733	AHCTF1|Q8WYP5|ELYS_HUMAN|1733	RDVVSSKTR	1	1	1	0	0	3	Q8WYP5	Nucleus	DVVSSKTR	2	AHCTF1	1	0	1	0	0	1	Passed	AHCTF1|1733	Nucleus	0.606461	0.803185	-1.40965	-0.311547	1.35043	-1.03888	NA	NA	NA	NA	NA
Q8WZ42|3157	TTN|Q8WZ42|TITIN_HUMAN|3157	REVIEKQR	1	1	1	0	0	3	Q8WZ42	Cytoplasm	QVIEKQR	1	TTN	0	0	1	0	0	0	Passed	TTN|3157	Cytoplasm	-1.20034	-0.0474224	1.24777	NA	NA	NA	NA	NA	NA	NA	NA
Q92598|466	HSPH1|Q92598|HS105_HUMAN|466	RDVSAQKDGEKSR	1	1	1	0	0	3	Q92598	Cytoplasm|Nucleus	NVSAQKDGEKSR	1	HSPH1	0	1	0	0	0	0	Passed	HSPH1|466	Cytoplasm	1.16013	0.120345	-1.28047	NA	NA	NA	NA	NA	NA	NA	NA
Q96AG4|223	LRRC59|Q96AG4|LRC59_HUMAN|223	REAPKSKSGSRPR	1	1	1	0	0	3	Q96AG4	Endoplasmic reticulum	QAPKSKSGSRPR	3	LRRC59	0	2	1	1	2	0	Passed	LRRC59|223	Endoplasmic reticulum	1.03596	0.315744	-1.3517	1.41187	-0.776473	-0.635393	NA	NA	NA	NA	NA
Q96CV9|251	OPTN|Q96CV9|OPTN_HUMAN|251	REVALKEAKER	1	1	1	0	0	3	Q96CV9	Cytoplasm	EVALKEAKER	2	OPTN	1	0	1	2	4	1	Passed	OPTN|251	Cytoplasm	-1.36463	1.00378	0.360849	NA	NA	NA	NA	NA	NA	NA	NA
Q96GX1|26	TCTN2|Q96GX1|TECT2_HUMAN|26	RDLAFIPPFIR	1	1	1	0	0	3	Q96GX1	Golgi apparatus	DLAFIPPFIR	1	TCTN2	0	1	0	1	1	1	Passed	TCTN2|26	Golgi apparatus	-0.412146	1.37765	-0.965508	-1.36775	0.995227	0.372526	SP	1	prot_pos_0	uniprot	NA
Q96HC4|302	PDLIM5|Q96HC4|PDLI5_HUMAN|302	RDTKKANNSQEPSPQLASSVASTR	1	1	1	0	0	3	Q96HC4	Cytoplasm	NTKKANNSQEPSPQLASSVASTR	2	PDLIM5	0	0	2	0	0	0	Passed	PDLIM5|302	Cytoplasm	-1.13022	1.30129	-0.171071	NA	NA	NA	NA	NA	NA	NA	NA
Q96HE7|24	ERO1A|Q96HE7|ERO1A_HUMAN|24	REEQPPETAAQR	1	1	1	0	0	3	Q96HE7	Endoplasmic reticulum	EEQPPETAAQR	6	ERO1A	0	1	5	2	2	2	Passed	ERO1A|24	Endoplasmic reticulum	-1.41262	0.764448	0.648172	-0.897077	-0.498266	1.39534	SP	1	prot_pos_0	uniprot	NA
Q96S16|24	JMJD8|Q96S16|JMJD8_HUMAN|24	REGDGGWRPGGPGAVAEEER	1	1	1	0	0	3	Q96S16	Endoplasmic reticulum	EGDGGWRPGGPGAVAEEER	2	JMJD8	0	1	1	0	1	1	Passed	JMJD8|24	Endoplasmic reticulum	0.975823	-1.37438	0.398557	-0.99404	1.36818	-0.374136	SP	1	prot_pos_0	uniprot	NA
Q99805|166	TM9SF2|Q99805|TM9S2_HUMAN|166	RDVEDGQRF	1	1	1	0	0	3	Q99805	Cell membrane|Lysosome/Vacuole	DVEDGQRF	1	TM9SF2	0	0	1	0	0	0	Passed	TM9SF2|166	Cell membrane	-1.21876	-0.0118863	1.23064	NA	NA	NA	NA	NA	NA	NA	NA
Q9BV44|214	THUMPD3|Q9BV44|THUM3_HUMAN|214	RESSKEETEPQVLKFR	1	1	1	0	0	3	Q9BV44	Cytoplasm|Nucleus	ESSKEETEPQVLKFR	4	THUMPD3	2	0	2	1	1	2	Passed	THUMPD3|214	Cytoplasm	-1.28115	0.121931	1.15922	NA	NA	NA	C14.003	0.991	procleave	NA	caspase-3
Q9BXS4|36	TMEM59|Q9BXS4|TMM59_HUMAN|36	REAFDSVLGDTASCHR	1	1	1	0	0	3	Q9BXS4	Endoplasmic reticulum|Lysosome/Vacuole|Golgi apparatus	EAFDSVLGDTASCHR	1	TMEM59	0	0	1	0	2	2	Passed	TMEM59|36	Endoplasmic reticulum	-1.03363	1.3527	-0.319068	1.1579	0.12422	-1.28212	SP	1	prot_pos_0	uniprot	NA
Q9C0C9|490	UBE2O|Q9C0C9|UBE2O_HUMAN|490	RDTSSVTSSASSTTSSQSGSGTSR	1	1	1	0	0	3	Q9C0C9	Cytoplasm|Nucleus	DTSSVTSSASSTTSSQSGSGTSR	2	UBE2O	1	0	1	0	0	0	Passed	UBE2O|490	Cytoplasm	NA	NA	NA	NA	NA	NA	NA	NA	NA	NA	NA
Q9H1R3|542	MYLK2|Q9H1R3|MYLK2_HUMAN|542	RDLAEKAKR	1	1	1	0	0	3	Q9H1R3	Cytoplasm	NLAEKAKR	2	MYLK2	1	0	1	0	0	0	Passed	MYLK2|542	Cytoplasm	-1.35002	1.03981	0.310206	NA	NA	NA	NA	NA	NA	NA	NA
Q9H2G4|6	TSPYL2|Q9H2G4|TSYL2_HUMAN|6	REGPPAKTRR	1	1	1	0	0	3	Q9H2G4	Cytoplasm|Nucleus	EGPPAKTRR	2	TSPYL2	0	1	1	0	1	0	Passed	TSPYL2|6	Cytoplasm	0.146135	1.14512	-1.29126	NA	NA	NA	NA	NA	NA	NA	NA
Q9NP84|28	TNFRSF12A|Q9NP84|TNR12_HUMAN|28	REQAPGTAPCSR	1	1	1	0	0	3	Q9NP84	Cell membrane	EQAPGTAPCSR	5	TNFRSF12A	0	2	3	5	13	8	Passed	TNFRSF12A|28	Cell membrane	0.119992	1.16033	-1.28032	0.984845	0.386532	-1.37138	SP	1	prot_pos_0	uniprot	NA
Q9NRY5|35	FAM114A2|Q9NRY5|F1142_HUMAN|35	REGAKPESKSEPVVSTR	1	1	1	0	0	3	Q9NRY5	Cytoplasm	QGAKPESKSEPVVSTR	1	FAM114A2	0	0	1	0	0	0	Passed	FAM114A2|35	Cytoplasm	-0.855796	1.40294	-0.547146	NA	NA	NA	NA	NA	NA	NA	NA
Q9NXG6|88	P4HTM|Q9NXG6|P4HTM_HUMAN|88	RDESSDPGPQHR	1	1	1	0	0	3	Q9NXG6	Endoplasmic reticulum|Golgi apparatus	DESSDPGPQHR	2	P4HTM	0	0	2	0	0	0	Passed	P4HTM|88	Endoplasmic reticulum	1.34251	-0.28622	-1.05629	NA	NA	NA	NA	NA	NA	NA	NA
Q9NYL4|26	FKBP11|Q9NYL4|FKB11_HUMAN|26	REAGLETESPVR	1	1	1	0	0	3	Q9NYL4	Endoplasmic reticulum	EAGLETESPVR	3	FKBP11	0	1	2	5	6	5	Passed	FKBP11|26	Endoplasmic reticulum	-0.221022	1.32021	-1.09918	1.27261	-0.102131	-1.17048	SP	1	prot_pos_neg2	uniprot	NA
Q9P0T7|21	TMEM9|Q9P0T7|TMEM9_HUMAN|21	RDKSSEDIR	1	1	1	0	0	3	Q9P0T7	Cell membrane|Endoplasmic reticulum	NKSSEDIR	1	TMEM9	0	0	1	1	1	0	Passed	TMEM9|21	Cell membrane	-1.21976	1.22967	-0.00991743	0.583541	-1.40739	0.82385	SP	1	prot_pos_0	uniprot	NA
Q9UEE9|44	CFDP1|Q9UEE9|CFDP1_HUMAN|44	RETQKTQGKKR	1	1	1	0	0	3	Q9UEE9	Nucleus	QTQKTQGKKR	3	CFDP1	0	1	2	0	0	0	Passed	CFDP1|44	Nucleus	1.21755	0.0142582	-1.23181	NA	NA	NA	NA	NA	NA	NA	NA
Q9UEU0|158	VTI1B|Q9UEU0|VTI1B_HUMAN|158	REIGSEIIEELGEQR	1	1	1	0	0	3	Q9UEU0	Endoplasmic reticulum|Lysosome/Vacuole	QIGSEIIEELGEQR	2	VTI1B	1	0	1	0	0	0	Passed	VTI1B|158	Endoplasmic reticulum	-1.41351	0.745507	0.667998	NA	NA	NA	NA	NA	NA	NA	NA
Q9UHB9|6	SRP68|Q9UHB9|SRP68_HUMAN|6	REVPGGGGGGGSGGGGGSGGGGSGGGR	1	1	1	0	0	3	Q9UHB9	Cytoplasm	QVPGGGGGGGSGGGGGSGGGGSGGGR	1	SRP68	0	0	1	0	0	0	Passed	SRP68|6	Cytoplasm	0.589777	0.81827	-1.40805	NA	NA	NA	NA	NA	NA	NA	NA
Q9UQ13|70	SHOC2|Q9UQ13|SHOC2_HUMAN|70	RDTIKRPNPAPGTR	1	1	1	0	0	3	Q9UQ13	Cytoplasm	NTIKRPNPAPGTR	1	SHOC2	0	0	1	0	0	0	Passed	SHOC2|70	Cytoplasm	NA	NA	NA	NA	NA	NA	NA	NA	NA	NA	NA
Q9Y4L1|713	HYOU1|Q9Y4L1|HYOU1_HUMAN|713	REDKLAQSVQKLQDLTLR	1	1	1	0	0	3	Q9Y4L1	Endoplasmic reticulum	EDKLAQSVQKLQDLTLR	1	HYOU1	0	0	1	1	1	1	Passed	HYOU1|713	Endoplasmic reticulum	1.14986	0.138074	-1.28793	NA	NA	NA	NA	NA	NA	NA	NA
Q9Y5K6|577	CD2AP|Q9Y5K6|CD2AP_HUMAN|577	RDVKKNSLDELR	1	1	1	0	0	3	Q9Y5K6	Cytoplasm	DVKKNSLDELR	1	CD2AP	0	0	1	0	0	0	Passed	CD2AP|577	Cytoplasm	-1.11982	1.30791	-0.18809	NA	NA	NA	C14.005	0.972	procleave	NA	caspase-5
Q9Y6M0|22	PRSS21|Q9Y6M0|TEST_HUMAN|22	RESQEAAPLSGPCGR	1	1	1	0	0	3	Q9Y6M0	Cell membrane	ESQEAAPLSGPCGR	6	PRSS21	0	6	4	2	3	2	Passed	PRSS21|22	Cell membrane	1.0615	0.278521	-1.34002	1.39567	-0.500146	-0.895523	SP	1	prot_pos_pos2	uniprot	NA

## Sheet: Mitochondrial Proteins
Entry	Entry Name	Protein names	Gene Names	Organism	Subcellular location [CC]
Q6NUK1	SCMC1_HUMAN	Mitochondrial adenyl nucleotide antiporter SLC25A24 (Mitochondrial ATP-Mg/Pi carrier protein 1) (Mitochondrial Ca(2+)-dependent solute carrier protein 1) (Short calcium-binding mitochondrial carrier protein 1) (SCaMC-1) (Solute carrier family 25 member 24)	SLC25A24 APC1 MCSC1 SCAMC1	Homo sapiens (Human)	SUBCELLULAR LOCATION: Mitochondrion inner membrane {ECO:0000305|PubMed:15054102, ECO:0000305|PubMed:15123600, ECO:0000305|PubMed:22015608}; Multi-pass membrane protein {ECO:0000255}.
P34897	GLYM_HUMAN	Serine hydroxymethyltransferase, mitochondrial (SHMT) (EC 2.1.2.1) (Glycine hydroxymethyltransferase) (Serine methylase)	SHMT2	Homo sapiens (Human)	SUBCELLULAR LOCATION: Mitochondrion {ECO:0000269|PubMed:21876188, ECO:0000269|PubMed:24075985}. Mitochondrion matrix, mitochondrion nucleoid {ECO:0000269|PubMed:18063578}. Mitochondrion inner membrane {ECO:0000269|PubMed:21876188}. Cytoplasm {ECO:0000269|PubMed:24075985}. Nucleus {ECO:0000269|PubMed:24075985}. Note=Mainly localizes in the mitochondrion. Also found in the cytoplasm and nucleus as …
P13995	MTDC_HUMAN	Bifunctional methylenetetrahydrofolate dehydrogenase/cyclohydrolase, mitochondrial [Includes: NAD-dependent methylenetetrahydrofolate dehydrogenase (EC 1.5.1.15); Methenyltetrahydrofolate cyclohydrolase (EC 3.5.4.9)]	MTHFD2 NMDMC	Homo sapiens (Human)	SUBCELLULAR LOCATION: Mitochondrion.
P07919	QCR6_HUMAN	Cytochrome b-c1 complex subunit 6, mitochondrial (Complex III subunit 6) (Complex III subunit VIII) (Cytochrome c1 non-heme 11 kDa protein) (Mitochondrial hinge protein) (Ubiquinol-cytochrome c reductase complex 11 kDa protein)	UQCRH	Homo sapiens (Human)	SUBCELLULAR LOCATION: Mitochondrion inner membrane {ECO:0000250|UniProtKB:P00127}; Peripheral membrane protein {ECO:0000250|UniProtKB:P00127}; Intermembrane side {ECO:0000250|UniProtKB:P00127}.
Q04837	SSBP_HUMAN	Single-stranded DNA-binding protein, mitochondrial (Mt-SSB) (MtSSB) (PWP1-interacting protein 17)	SSBP1 SSBP	Homo sapiens (Human)	SUBCELLULAR LOCATION: Mitochondrion {ECO:0000269|PubMed:18063578, ECO:0000269|PubMed:31550237, ECO:0000269|PubMed:31550240}. Mitochondrion matrix, mitochondrion nucleoid {ECO:0000269|PubMed:18063578, ECO:0000269|PubMed:31550240}.

## Sheet: Cleavage Sites
prot_pos_master	prot_pos_reposition	sequence	pcc_check	rt_check	b_y_ttest_check	p2gv_check	p1r_check	score_sum	prot	Localizations	Sequence	count	gene	MOCK	MG132	MGTG	argpair_MOCK	argpair_MG132	argpair_MGTG	ML filtering	gene_position	loc	MG132_arg	MGTG_arg	MOCK_arg	MG132_free	MGTG_free	MOCK_free	cleavage_type	cleavage_score	cleavage_pos	source_cleavage	protease
P60709|280	ACTB|P60709|ACTB_HUMAN|280	RDSIMKCDVDIR	1	1	1	0	0	3	P60709	Cytoplasm|Nucleus	NSIMKCDVDIR	9	ACTB	0	5	4	32	22	21	Passed	ACTB|280	Cytoplasm	1.4105	-0.793942	-0.616559	-1.36006	0.344365	1.0157	A01.009	0.989	procleave	NA	cathepsin D
A5A3E0|712	ACTB|P60709|ACTB_HUMAN|12	RDGSGMCKAGFAGDDAPR	1	1	1	0	0	3	A5A3E0	Cytoplasm	NGSGMCKAGFAGDDAPR	25	ACTB	4	12	9	21	30	19	Passed	ACTB|712	Cytoplasm	0.87959	-1.39883	0.519237	0.358144	1.00575	-1.36389	C14.001	0.995	procleave	NA	caspase-1
P21333|1502	FLNA|P21333|FLNA_HUMAN|1502	RDADGTQTVNYVPSR	1	1	1	0	0	3	P21333	Cytoplasm	NADGTQTVNYVPSR	24	FLNA	0	12	12	0	0	0	Passed	FLNA|1502	Cytoplasm	0.998457	0.368132	-1.36659	NA	NA	NA	C14.003	0.996	procleave	NA	caspase-3
P23588|46	EIF4B|P23588|IF4B_HUMAN|46	RDLEGDVSTTWHSNDDDVYR	1	1	1	0	0	3	P23588	Cytoplasm	DLEGDVSTTWHSNDDDVYR	1	EIF4B	0	0	3	0	0	0	Passed	EIF4B|46	Cytoplasm	-0.949962	1.38227	-0.432311	NA	NA	NA	C14.003	0.997	procleave	NA	caspase-3
P26038|485	MSN|P26038|MOES_HUMAN|485	RENGAEASADLR	1	1	1	0	0	3	P26038	Cytoplasm	ENGAEASADLR	1	MSN	0	0	1	14	6	8	Passed	MSN|485	Cytoplasm	-1.29307	1.1425	0.150568	NA	NA	NA	C14.003	0.957	procleave	NA	caspase-3
P62310|7	LSM3|P62310|LSM3_HUMAN|7	REQQTTNTVEEPLDLIR	1	1	1	0	0	3	P62310	Cytoplasm|Nucleus	QQQTTNTVEEPLDLIR	11	LSM3	0	5	6	0	0	0	Passed	LSM3|7	Cytoplasm	-1.30539	1.12382	0.181571	NA	NA	NA	C14.003	0.994	procleave	NA	caspase-3
P78527|2714	PRKDC|P78527|PRKDC_HUMAN|2714	RDKVKGAAGRTDLLR	1	1	1	0	0	3	P78527	Cytoplasm	NKVKGAAGR	16	PRKDC	3	9	8	1	3	5	Passed	PRKDC|2714	Cytoplasm	0.76901	0.643341	-1.41235	0.809587	0.599411	-1.409	C14.003	0.998	procleave	NA	caspase-3
Q13136|837	PPFIA1|Q13136|LIPA1_HUMAN|837	RDSSQDALGLSKLGGQAEKNR	1	1	1	0	0	3	Q13136	Cytoplasm	NSSQDALGLSKLGGQAEKNR	5	PPFIA1	0	3	2	0	0	0	Passed	PPFIA1|837	Cytoplasm	0.502896	0.893245	-1.39614	NA	NA	NA	C14.003	0.996	procleave	NA	caspase-3
Q71F23|49	CENPU|Q71F23|CENPU_HUMAN|49	RDSDVSSIGR	1	1	1	0	0	3	Q71F23	Nucleus	NSDVSSIGR	3	CENPU	0	3	0	0	0	0	Passed	CENPU|49	Nucleus	1.13154	0.168877	-1.30042	NA	NA	NA	C14.003	0.94	procleave	NA	caspase-3
Q75N03|6	CBLL1|Q75N03|HAKAI_HUMAN|6	RDELQGTNSSGSLGGLDVR	1	1	1	0	0	3	Q75N03	Cytoplasm|Nucleus	NELQGTNSSGSLGGLDVR	1	CBLL1	0	0	1	0	0	0	Passed	CBLL1|6	Cytoplasm	0.837697	0.567913	-1.40561	NA	NA	NA	C14.003	0.949	procleave	NA	caspase-3
Q8N684|33	CPSF7|Q8N684|CPSF7_HUMAN|33	RDVLTATSQPSDDR	1	1	1	0	0	3	Q8N684	Nucleus	DVLTATSQPSDDR	1	CPSF7	0	0	1	0	0	0	Passed	CPSF7|33	Nucleus	1.38203	-0.431214	-0.950815	NA	NA	NA	C14.003	0.914	procleave	NA	caspase-3
Q9BV44|214	THUMPD3|Q9BV44|THUM3_HUMAN|214	RESSKEETEPQVLKFR	1	1	1	0	0	3	Q9BV44	Cytoplasm|Nucleus	ESSKEETEPQVLKFR	4	THUMPD3	2	0	2	1	1	2	Passed	THUMPD3|214	Cytoplasm	-1.28115	0.121931	1.15922	NA	NA	NA	C14.003	0.991	procleave	NA	caspase-3
P02545|231	LMNA|P02545|LMNA_HUMAN|231	RDGKQREFESR	1	1	1	0	0	3	P02545	Cytoplasm|Nucleus	NGKQREFESR	11	LMNA	2	7	2	0	0	0	Passed	LMNA|231	Cytoplasm	0.800881	0.608986	-1.40987	NA	NA	NA	C14.005	0.995	procleave	NA	caspase-5
Q03518|638	TAP1|Q03518|TAP1_HUMAN|638	REAGSQLSGGQR	1	1	1	0	0	3	Q03518	Lysosome/Vacuole	EAGSQLSGGQR	1	TAP1	0	1	0	1	2	0	Passed	TAP1|638	Lysosome/Vacuole	1.39949	-0.523508	-0.875987	NA	NA	NA	C14.005	0.94	procleave	NA	caspase-5
Q9Y5K6|577	CD2AP|Q9Y5K6|CD2AP_HUMAN|577	RDVKKNSLDELR	1	1	1	0	0	3	Q9Y5K6	Cytoplasm	DVKKNSLDELR	1	CD2AP	0	0	1	0	0	0	Passed	CD2AP|577	Cytoplasm	-1.11982	1.30791	-0.18809	NA	NA	NA	C14.005	0.972	procleave	NA	caspase-5
P42766|23	RPL35|P42766|RL35_HUMAN|23	RDLKVELSQLR	1	1	1	0	0	3	P42766	Cytoplasm	DLKVELSQLR	1	RPL35	0	1	0	1	1	1	Passed	RPL35|23	Cytoplasm	0.547956	0.855096	-1.40305	1.2663	-0.0878486	-1.17846	M12.002	0.989	procleave	NA	meprin alpha subunit
P67809|223	YBX1|P67809|YBOX1_HUMAN|223	RDQGAGEQGRPVR	1	1	1	0	0	3	P67809	Cytoplasm|Nucleus	NQGAGEQGRPVR	1	YBX1	0	0	1	0	0	0	Passed	YBX1|223	Cytoplasm	-1.21435	1.23488	-0.0205289	NA	NA	NA	M12.002	0.985	procleave	NA	meprin alpha subunit
P08670|259	VIM|P08670|VIME_HUMAN|259	RDVSKPDLTAALR	1	1	1	0	0	3	P08670	Cytoplasm	DVSKPDLTAALR	1	VIM	0	1	0	0	0	1	Passed	VIM|259	Cytoplasm	1.21729	0.0147742	-1.23207	-0.255942	1.33249	-1.07655	M12.004	0.986	procleave	NA	meprin beta subunit
Q8NC51|7	SERBP1|Q8NC51|PAIRB_HUMAN|7	REGFGCVVTNR	1	1	1	0	0	3	Q8NC51	Cytoplasm	EGFGCVVTNR	2	SERBP1	0	1	1	7	10	6	Passed	SERBP1|7	Cytoplasm	1.12219	0.184233	-1.30642	NA	NA	NA	M12.004	0.99	procleave	NA	meprin beta subunit
O60427|4	FADS1|O60427|FADS1_HUMAN|4	RDPVAAETAAQGPTPR	1	1	1	0	0	3	O60427	Endoplasmic reticulum	DPVAAETAAQGPTPR	17	FADS1	6	5	6	2	4	4	Passed	FADS1|4	Endoplasmic reticulum	1.41077	-0.619915	-0.790851	-0.542922	1.40236	-0.859436	M12.033	0.937	procleave	NA	LAST_MAM peptidase
P07919|15	UQCRHL|A0A096LP55|QCR6L_HUMAN|15	RDPEEEEEEEEELVDPLTTVR	1	1	1	0	0	3	P07919	Cytoplasm|Mitochondrion	DPEEEEEEEEELVDPLTTVR	2	UQCRHL	0	1	1	0	0	0	Passed	UQCRHL|15	Cytoplasm	-1.36284	1.00852	0.354323	NA	NA	NA	mTP	1	prot_pos_pos1	uniprot	NA
P13995|36	MTHFD2|P13995|MTDC_HUMAN|36	REAVVISGR	1	1	1	0	0	3	P13995	Mitochondrion	EAVVISGR	2	MTHFD2	0	1	1	6	4	5	Passed	MTHFD2|36	Mitochondrion	1.13165	0.168698	-1.30035	1.30706	-1.12118	-0.185872	mTP	1	prot_pos_0	uniprot	NA
P34897|27	SHMT2|P34897|GLYM_HUMAN|27	REHSNAAQTQTGEANR	1	1	1	0	0	3	P34897	Mitochondrion	QHSNAAQTQTGEANR	2	SHMT2	0	1	1	16	5	4	Passed	SHMT2|27	Mitochondrion	-0.674999	1.41373	-0.738735	-1.41421	0.709941	0.704269	mTP	0.958177	prot_pos_neg2	NA	NA
Q04837|17	SSBP1|Q04837|SSBP_HUMAN|17	RESETTTSLVLER	1	1	1	0	0	3	Q04837	Mitochondrion	ESETTTSLVLER	3	SSBP1	2	0	1	37	25	21	Passed	SSBP1|17	Mitochondrion	-1.3498	0.309497	1.04031	0.461439	-1.38844	0.926996	mTP	1	prot_pos_0	uniprot	NA
Q12972|165	PPP1R8|Q12972|PP1R8_HUMAN|165	RDLTEFNTAHNKR	1	1	1	0	0	3	Q12972	Nucleus	NLTEFNTAHNKR	2	PPP1R8	0	0	2	0	0	0	Passed	PPP1R8|165	Nucleus	0.743581	0.669994	-1.41358	NA	NA	NA	S01.010	0.911	procleave	NA	granzyme B
P02452|24	COL1A1|P02452|CO1A1_HUMAN|24	REEGQVEGQDEDIPPITCVQNGLR	1	1	1	0	0	3	P02452	Extracellular	EEGQVEGQDEDIPPITCVQNGLR	1	COL1A1	0	0	1	0	0	0	Passed	COL1A1|24	Extracellular	-0.942564	1.38434	-0.441779	NA	NA	NA	SP	1	prot_pos_pos1	uniprot	NA
P07237|18	P4HB|P07237|PDIA1_HUMAN|18	RDAPEEEDHVLVLR	1	1	1	0	0	3	P07237	Endoplasmic reticulum	DAPEEEDHVLVLR	37	P4HB	1	11	25	64	73	34	Passed	P4HB|18	Endoplasmic reticulum	0.0942243	1.17491	-1.26914	0.932649	-1.38699	0.454341	SP	1	prot_pos_0	uniprot	NA
P07996|19	THBS1|P07996|TSP1_HUMAN|19	RDRIPESGGDNSVFDIFELTGAAR	1	1	1	0	0	3	P07996	Extracellular	NRIPESGGDNSVFDIFELTGAAR	5	THBS1	0	0	5	3	2	8	Passed	THBS1|19	Extracellular	-0.798663	1.41008	-0.611412	-1.19077	1.2561	-0.065334	SP	1	prot_pos_0	uniprot	NA
P08174|35	CD55|P08174|DAF_HUMAN|35	RDCGLPPDVPNAQPALEGR	1	1	1	0	0	3	P08174	Cell membrane	DCGLPPDVPNAQPALEGR	25	CD55	0	4	21	68	65	45	Passed	CD55|35	Cell membrane	0.0455388	1.20134	-1.24688	-0.375376	-0.993125	1.3685	SP	1	prot_pos_0	uniprot	NA
P14625|22	HSP90B1|P14625|ENPL_HUMAN|22	RDDEVDVDGTVEEDLGKSR	1	1	1	0	0	3	P14625	Endoplasmic reticulum|Lysosome/Vacuole	DDEVDVDGTVEEDLGKSR	64	HSP90B1	0	2	62	59	15	45	Passed	HSP90B1|22	Endoplasmic reticulum	-0.396246	1.37381	-0.977565	-1.37544	0.402899	0.972541	SP	1	prot_pos_0	uniprot	NA
P14625|24	HSP90B1|P14625|ENPL_HUMAN|24	REVDVDGTVEEDLGKSR	1	1	1	0	0	3	P14625	Endoplasmic reticulum|Lysosome/Vacuole	EVDVDGTVEEDLGKSR	12	HSP90B1	0	2	10	19	16	17	Passed	HSP90B1|24	Endoplasmic reticulum	-0.133804	1.28615	-1.15235	0.24035	1.08675	-1.3271	SP	1	prot_pos_pos2	uniprot	NA
P17813|26	ENG|P17813|EGLN_HUMAN|26	RETVHCDLQPVGPER	1	1	1	0	0	3	P17813	Cell membrane	ETVHCDLQPVGPER	2	ENG	0	0	2	11	5	5	Passed	ENG|26	Cell membrane	-1.1983	-0.0512878	1.24958	-0.00797024	-1.22074	1.22871	SP	1	prot_pos_0	uniprot	NA
P22692|22	IGFBP4|P22692|IBP4_HUMAN|22	RDEAIHCPPCSEEKLAR	1	1	1	0	0	3	P22692	Extracellular	DEAIHCPPCSEEKLAR	2	IGFBP4	0	0	2	3	3	2	Passed	IGFBP4|22	Extracellular	0.347354	1.01355	-1.3609	0.547666	-1.40301	0.855347	SP	1	prot_pos_0	uniprot	NA
P23142|30	FBLN1|P23142|FBLN1_HUMAN|30	RDVLLEACCADGHR	1	1	1	0	0	3	P23142	Extracellular	DVLLEACCADGHR	12	FBLN1	0	4	8	7	16	6	Passed	FBLN1|30	Extracellular	0.322021	1.03156	-1.35358	1.32659	-1.08771	-0.238881	SP	1	prot_pos_0	uniprot	NA
P27797|18	CALR|P27797|CALR_HUMAN|18	REPAVYFKEQFLDGDGWTSR	1	1	1	0	0	3	P27797	Endoplasmic reticulum	EPAVYFKEQFLDGDGWTSR	36	CALR	1	5	30	23	15	9	Passed	CALR|18	Endoplasmic reticulum	-0.622064	1.41093	-0.788867	-0.878821	-0.520149	1.39897	SP	1	prot_pos_0	uniprot	NA
P30101|26	PDIA3|P30101|PDIA3_HUMAN|26	RDVLELTDDNFESR	1	1	1	0	0	3	P30101	Endoplasmic reticulum	DVLELTDDNFESR	3	PDIA3	0	0	3	0	0	0	Passed	PDIA3|26	Endoplasmic reticulum	-0.678407	1.41383	-0.735423	NA	NA	NA	SP	1	prot_pos_pos1	uniprot	NA
P35052|24	GPC1|P35052|GPC1_HUMAN|24	RDPASKSR	1	1	1	0	0	3	P35052	Cell membrane	DPASKSR	1	GPC1	0	0	1	1	1	1	Passed	GPC1|24	Cell membrane	0.842536	0.562398	-1.40493	1.40631	-0.573854	-0.832456	SP	1	prot_pos_0	uniprot	NA
P35555|28	FBN1|P35555|FBN1_HUMAN|28	RDLEAGNVKETR	1	1	1	0	0	3	P35555	Extracellular	NLEAGNVKETR	4	FBN1	0	2	2	2	1	0	Passed	FBN1|28	Extracellular	0.401468	0.973625	-1.37509	1.02284	0.334365	-1.3572	SP	0.999856	prot_pos_0	NA	NA
P78333|25	GPC5|P78333|GPC5_HUMAN|25	REGVQTCEEVR	1	1	1	0	0	3	P78333	Cell membrane	EGVQTCEEVR	2	GPC5	0	1	1	0	0	0	Passed	GPC5|25	Cell membrane	1.04978	0.295764	-1.34554	NA	NA	NA	SP	1	prot_pos_0	uniprot	NA
P98153|22	DGCR2|P98153|IDD_HUMAN|22	REPLRPELR	1	1	1	0	0	3	P98153	Cell membrane|Lysosome/Vacuole	EPLRPELR	2	DGCR2	0	1	1	0	0	0	Passed	DGCR2|22	Cell membrane	-0.0616337	1.2544	-1.19276	NA	NA	NA	SP	1	prot_pos_pos1	uniprot	NA
Q12907|45	LMAN2|Q12907|LMAN2_HUMAN|45	RDITDGNSEHLKR	1	1	1	0	0	3	Q12907	Endoplasmic reticulum|Lysosome/Vacuole|Golgi apparatus	DITDGNSEHLKR	4	LMAN2	0	0	4	26	22	14	Passed	LMAN2|45	Endoplasmic reticulum	0.185582	1.12136	-1.30694	1.26452	-1.18067	-0.0838495	SP	1	prot_pos_0	uniprot	NA
Q13018|21	PLA2R1|Q13018|PLA2R_HUMAN|21	REGVAAALTPER	1	1	1	0	0	3	Q13018	Cell membrane|Lysosome/Vacuole	EGVAAALTPER	1	PLA2R1	0	1	0	0	1	1	Passed	PLA2R1|21	Cell membrane	1.41362	-0.671348	-0.742272	1.31199	-0.198821	-1.11317	SP	1	prot_pos_0	uniprot	NA
Q14257|26	RCN2|Q14257|RCN2_HUMAN|26	REELHYPLGER	1	1	1	0	0	3	Q14257	Endoplasmic reticulum	EELHYPLGER	2	RCN2	0	0	2	4	2	2	Passed	RCN2|26	Endoplasmic reticulum	-0.997411	1.36697	-0.369556	0.230793	-1.32372	1.09293	SP	0.999846	prot_pos_0	NA	NA
Q15904|42	ATP6AP1|Q15904|VAS1_HUMAN|42	REQQVPLVLWSSDR	1	1	1	0	0	3	Q15904	Lysosome/Vacuole	EQQVPLVLWSSDR	2	ATP6AP1	0	2	0	2	2	1	Passed	ATP6AP1|42	Lysosome/Vacuole	0.857021	0.545726	-1.40275	0.532264	-1.40082	0.868558	SP	1	prot_pos_0	uniprot	NA
Q16363|28	LAMA4|Q16363|LAMA4_HUMAN|28	RDDNAFPFDIEGSSAVGR	1	1	1	0	0	3	Q16363	Extracellular	DDNAFPFDIEGSSAVGR	1	LAMA4	0	0	1	0	0	0	Passed	LAMA4|28	Extracellular	NA	NA	NA	NA	NA	NA	SP	0.999897	prot_pos_0	NA	NA
Q17RY6|18	LY6K|Q17RY6|LY6K_HUMAN|18	RDANLTAR	1	1	1	0	0	3	Q17RY6	Cell membrane	DANLTAR	1	LY6K	0	0	1	0	0	0	Passed	LY6K|18	Cell membrane	0.053554	1.19709	-1.25064	NA	NA	NA	SP	1	prot_pos_0	uniprot	NA
Q68BL7|28	OLFML2A|Q68BL7|OLM2A_HUMAN|28	RDSKVFGDLDQVR	1	1	1	0	0	3	Q68BL7	Extracellular	DSKVFGDLDQVR	3	OLFML2A	0	1	2	0	0	1	Passed	OLFML2A|28	Extracellular	0.877723	0.521452	-1.39917	1.40524	-0.564851	-0.840387	SP	1	prot_pos_0	uniprot	NA
Q7Z4N8|29	P4HA3|Q7Z4N8|P4HA3_HUMAN|29	RDTFSALTSVAR	1	1	1	0	0	3	Q7Z4N8	Endoplasmic reticulum	DTFSALTSVAR	3	P4HA3	0	2	1	2	1	0	Passed	P4HA3|29	Endoplasmic reticulum	1.31159	-0.197746	-1.11384	-0.0598355	-1.19373	1.25357	SP	0.999839	prot_pos_pos2	NA	NA
Q96GX1|26	TCTN2|Q96GX1|TECT2_HUMAN|26	RDLAFIPPFIR	1	1	1	0	0	3	Q96GX1	Golgi apparatus	DLAFIPPFIR	1	TCTN2	0	1	0	1	1	1	Passed	TCTN2|26	Golgi apparatus	-0.412146	1.37765	-0.965508	-1.36775	0.995227	0.372526	SP	1	prot_pos_0	uniprot	NA
Q96HE7|24	ERO1A|Q96HE7|ERO1A_HUMAN|24	REEQPPETAAQR	1	1	1	0	0	3	Q96HE7	Endoplasmic reticulum	EEQPPETAAQR	6	ERO1A	0	1	5	2	2	2	Passed	ERO1A|24	Endoplasmic reticulum	-1.41262	0.764448	0.648172	-0.897077	-0.498266	1.39534	SP	1	prot_pos_0	uniprot	NA
Q96S16|24	JMJD8|Q96S16|JMJD8_HUMAN|24	REGDGGWRPGGPGAVAEEER	1	1	1	0	0	3	Q96S16	Endoplasmic reticulum	EGDGGWRPGGPGAVAEEER	2	JMJD8	0	1	1	0	1	1	Passed	JMJD8|24	Endoplasmic reticulum	0.975823	-1.37438	0.398557	-0.99404	1.36818	-0.374136	SP	1	prot_pos_0	uniprot	NA
Q9BXS4|36	TMEM59|Q9BXS4|TMM59_HUMAN|36	REAFDSVLGDTASCHR	1	1	1	0	0	3	Q9BXS4	Endoplasmic reticulum|Lysosome/Vacuole|Golgi apparatus	EAFDSVLGDTASCHR	1	TMEM59	0	0	1	0	2	2	Passed	TMEM59|36	Endoplasmic reticulum	-1.03363	1.3527	-0.319068	1.1579	0.12422	-1.28212	SP	1	prot_pos_0	uniprot	NA
Q9NP84|28	TNFRSF12A|Q9NP84|TNR12_HUMAN|28	REQAPGTAPCSR	1	1	1	0	0	3	Q9NP84	Cell membrane	EQAPGTAPCSR	5	TNFRSF12A	0	2	3	5	13	8	Passed	TNFRSF12A|28	Cell membrane	0.119992	1.16033	-1.28032	0.984845	0.386532	-1.37138	SP	1	prot_pos_0	uniprot	NA
Q9NYL4|26	FKBP11|Q9NYL4|FKB11_HUMAN|26	REAGLETESPVR	1	1	1	0	0	3	Q9NYL4	Endoplasmic reticulum	EAGLETESPVR	3	FKBP11	0	1	2	5	6	5	Passed	FKBP11|26	Endoplasmic reticulum	-0.221022	1.32021	-1.09918	1.27261	-0.102131	-1.17048	SP	1	prot_pos_neg2	uniprot	NA
Q9P0T7|21	TMEM9|Q9P0T7|TMEM9_HUMAN|21	RDKSSEDIR	1	1	1	0	0	3	Q9P0T7	Cell membrane|Endoplasmic reticulum	NKSSEDIR	1	TMEM9	0	0	1	1	1	0	Passed	TMEM9|21	Cell membrane	-1.21976	1.22967	-0.00991743	0.583541	-1.40739	0.82385	SP	1	prot_pos_0	uniprot	NA
Q9Y6M0|22	PRSS21|Q9Y6M0|TEST_HUMAN|22	RESQEAAPLSGPCGR	1	1	1	0	0	3	Q9Y6M0	Cell membrane	ESQEAAPLSGPCGR	6	PRSS21	0	6	4	2	3	2	Passed	PRSS21|22	Cell membrane	1.0615	0.278521	-1.34002	1.39567	-0.500146	-0.895523	SP	1	prot_pos_pos2	uniprot	NA
